# Supplementary material for: Structure-Based Virtual Screening, Docking, ADMET, Molecular Dynamics, and MM-PBSA Calculations for the Discovery of Potential Natural SARS-CoV-2 Helicase Inhibitors from the Traditional Chinese Medicine
Source: Hindawi journal article supplement (doi:10.1155/2022/7270094), 2022-08-22
Supplement: f1 [file 7270094.f1.pdf]

## Supporting Data

### Structure-Based Virtual Screening, Docking, ADMET, Molecular Dynamics, and MM-PBSA Calculations for the discovery of Potential Natural SARS-CoV-2 Helicase Inhibitors From The Traditional Chinese Medicine

Ahmed M. Metwaly<sup>a,b\*</sup>, Alaa Elwan<sup>c</sup>, Abdul-Aziz M.M. El-Attar<sup>d</sup>, Sara T. Al-Rashood<sup>e</sup>,  
Ibrahim. H. Eissa<sup>c\*</sup>

<sup>a</sup> Pharmacognosy and Medicinal Plants Department, Faculty of Pharmacy (Boys), Al-Azhar University, Cairo 11884, Egypt

<sup>b</sup>. Biopharmaceutical Products Research Department, Genetic Engineering and Biotechnology Research Institute, City of Scientific Research and Technological Applications (SRTA-City), Alexandria 21934, Egypt

<sup>c</sup> Pharmaceutical Medicinal Chemistry & Drug Design Department, Faculty of Pharmacy (Boys), Al-Azhar University, Cairo 11884, Egypt.

<sup>d</sup> Pharmaceutical Analytical Chemistry Department, Faculty of Pharmacy, Al-Azhar University, 11884, Nasr City, Cairo, Egypt

<sup>e</sup> Department of Pharmaceutical Chemistry, College of Pharmacy, King Saud University, P.O. Box 2457, Riyadh 11451, Saudi Arabia, salrashood@ksu.edu.sa

#### \*Corresponding authors:

#### Ahmed M. Metwaly

Pharmacognosy and Medicinal Plants Department, Faculty of Pharmacy (Boys), Al-Azhar University, Cairo 11884, Egypt. **Email:** [ametwaly@azhar.edu.eg](mailto:ametwaly@azhar.edu.eg)

#### Ibrahim H. Eissa

Medicinal Chemistry Department, Faculty of Pharmacy (Boys), Al-Azhar University, Cairo 11884, Egypt. **Email:** [Ibrahimeissa@azhar.edu.eg](mailto:Ibrahimeissa@azhar.edu.eg)

## Content

|                 |                               |
|-----------------|-------------------------------|
| Method          | Fingerprint studies           |
|                 | Molecular Similarity          |
|                 | Docking studies               |
|                 | ADMET studies                 |
|                 | Toxicity studies              |
|                 | Molecular dynamics and MMPBSA |
| Toxicity report |                               |

# Method

### **Fingerprint study**

Fingerprint study of the selected compounds against the co-crystallized ligand was carried out calculated using Discovery studio 4.0. At first, the CHARMM force field was applied then the compounds were prepared using prepare ligand protocol. Then, the compounds were used as a test set while the co-crystallized ligand was used as a reference compounds. The protocol was adjusted to give the most related compounds to the co-crystallized ligand. The default molecular properties were applied. The used fingerprints were based on some parameters related to type of atoms which may be one of the following: charge, hybridization, H-bond acceptor, H-bond donor, Positive ionizable, Negative ionizable, Halogen, Aromatic, or None of the above. In addition, it includes the ALogP category of atoms.

### **Molecular Similarity**

Molecular Similarity of the examined natural compounds against the co-crystallized ligand was carried out calculated using Discovery studio 4.0. At first, the CHARMM force field was applied then the compounds were prepared using prepare ligand protocol. Then, the compounds were used as a test set while the co-crystallized ligand was used as a reference compounds. The default molecular properties were applied. The molecular properties include number of rotatable bonds, number of rings, number of aromatic rings, number of hydrogen bond donors (HBA), number of hydrogen bond acceptors (HBD), partition coefficient (ALog p), molecular weight (M. Wt), and molecular fractional polar surface area (MFPSA).

### **Docking studies**

Crystal structure target enzyme was obtained from Protein Data Bank. The docking investigation was accomplished using MOE2014 software. At first, the crystal structure of the protein was prepared by removing water molecules. Only one chain was retained beside the co-crystallized ligand. Then, the selected chain was protonated and subjected to minimization of energy process. Next, the active site of the target protein was defined.

Structures of the tested compounds and the co-crystallized ligand were drawn using ChemBioDraw Ultra 14.0 and saved as MDL-SD format. Such file was opened using MOE to display the 3D structures which were protonated and subjected to energy minimization. Formerly, validation of the docking process was performed by docking the co-crystallized ligand against the isolated pocket of active site. The produced RMSD value indicated the validity of process. Finally,

docking of the tested compounds was done through the dock option inserted in compute window. For each docked molecule, 30 docked poses were produced using ASE for scoring function and force field for refinement. The results of the docking process were then visualized using Discovery Studio 4.0 software.

### **ADMET studies**

ADMET descriptors (absorption, distribution, metabolism, excretion and toxicity) of the compounds were determined using Discovery studio 4.0. At first, the CHARMM force field was applied then the tested compounds were prepared and minimized according to the preparation of small molecule protocol. Then ADMET descriptors protocol was applied to carry out these studies.

### **Toxicity studies**

The toxicity parameters of the tested compounds were calculated using Discovery studio 4.0. At first, the CHARMM force field was applied then the compounds were prepared and minimized according to the preparation of small molecule protocol. Then different parameters were calculated from the toxicity prediction (extensible) protocol.

### **Molecular Dynamics (MD) Simulations**

The system was prepared using the web-based CHARMM-GUI<sup>1-3</sup> interface with the CHARMM36 force field<sup>4</sup>. All the simulations were done using the NAMD 2.13<sup>5</sup> package. The TIP3P explicit solvation model was used<sup>6</sup>, and the periodic boundary conditions were set with a dimension of the dimensions ---- Å, ----- Å, and ----- Å in x, y, and z, respectively. The parameters for the top docking results were generated using the CHARMM general force field<sup>7</sup> Afterward, the system was neutralized using ---- (Cl<sup>-</sup>/Na<sup>+</sup>) ions. The MD protocols involved minimization, equilibration, and production. a 2 *fs* time step of integration was chosen for all MD simulations, the equilibration was carried in the canonical (*NVT*) ensemble, while the isothermal–isobaric (*NPT*) ensemble was for the production. Through the 100 *ns* of MD production, the pressure was set at 1 atm using the Nose–Hoover Langevin piston barostat<sup>8,9</sup> with a Langevin piston decay of 0.05 *ps* and a period of 0.1 *ps*. The temperature was set at 298.15 K using the Langevin thermostat<sup>10</sup>. A distance cutoff of 12.0 Å was applied to short-range nonbonded interactions with a pair list distance of 16 Å, and Lennard Jones interactions were smoothly truncated at 8.0 Å. Long-range electrostatic interactions were treated using the particle-mesh Ewald (PME) method<sup>11,12</sup>, where a grid spacing of 1.0 Å was used for all simulation cells. All covalent bonds involving

hydrogen atoms were constrained using the SHAKE algorithm<sup>13</sup>. For consistency, we have applied the same protocol for all MD simulations.

### *Binding Energy Calculations*

The one-average molecular mechanics generalized Born surface area (MM/GBSA)<sup>14, 15</sup> approach implemented in the MOLAICAL code<sup>16</sup> was used for the relative binding energy calculations, in which the ligand ( $L$ ) binds to the protein receptor ( $R$ ) to form the complex ( $RL$ ),

$$\Delta G_{bind} = \Delta G_{RL} - \Delta G_R - \Delta G_L$$

which can be represented by contributions of different interactions,

$$\Delta G_{bind} = \Delta H - T\Delta S = \Delta E_{MM} + \Delta G_{Sol} - T\Delta S$$

where the changes in the gas phase molecular mechanics ( $\Delta E_{MM}$ ), solvation Gibbs energy ( $\Delta G_{Sol}$ ), and conformational entropy ( $-T\Delta S$ ) are determined as follows:  $\Delta E_{MM}$  is the sum of the changes in the electrostatic energies  $\Delta E_{ele}$ , the van der Waals energies  $\Delta E_{vdW}$ , and the internal energies  $\Delta E_{int}$  (bonded interactions);  $\Delta G_{Sol}$  is the total of both the polar solvation (calculated using the generalized Born model) and the nonpolar solvation (the solvent-accessible surface area) and  $-T\Delta S$  is calculated by the normal mode analysis. The solvent dielectric constant of 78.5 and the surface tension constant of 0.03012 kJ mol<sup>-1</sup> Å<sup>2</sup> were used for MM/GBSA calculations.

### **MMPBSA**

The `g_mmpbsa` package of GROMACS was utilized to calculate the MM/PBSA (Molecular Mechanics/Poisson Boltzmann Surface Area) binding free energies followed by final MD production run to get a detailed overview of the molecular interactions between the protein and ligand. The free solvation energy (polar and nonpolar solvation energies) and potential energy (electrostatic and Van der Waals interactions) of each protein-ligand complex were analyzed to determine the total  $\Delta G_{bind}$  of the complex. The binding energies were calculated using the following equation in this method:

$$\Delta G_{binding} = G_{complex} - (G_{protein} + G_{ligand})$$

Here, the  $\Delta G_{binding}$  = the total binding energy of the protein-ligand complex,  $G_{protein}$  = the energy of free protein, and  $G_{ligand}$  = the of unbounded ligand.

# Toxicity Report

AND Enantiomer

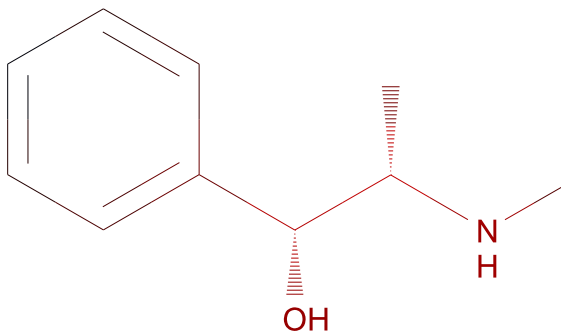C<sub>10</sub>H<sub>15</sub>NO

Molecular Weight: 165.232

ALogP: 1.234

Rotatable Bonds: 3

Acceptors: 2

Donors: 2

## Model Prediction

**Prediction: Toxic**

Probability: 0.694

Enrichment: 1.32

Bayesian Score: 3.75

Mahalanobis Distance: 10.1

Mahalanobis Distance p-value: 0.0165

Prediction: Positive if the Bayesian score is above the estimated best cutoff value from minimizing the false positive and false negative rate.

Probability: The estimated probability that the sample is in the positive category. This assumes that the Bayesian score follows a normal distribution and is different from the prediction using a cutoff.

Enrichment: An estimate of enrichment, that is, the increased likelihood (versus random) of this sample being in the category.

Bayesian Score: The standard Laplacian-modified Bayesian score.

Mahalanobis Distance: The Mahalanobis distance (MD) is the distance to the center of the training data. The larger the MD, the less trustworthy the prediction.

Mahalanobis Distance p-value: The p-value gives the fraction of training data with an MD greater than or equal to the one for the given sample, assuming normally distributed data. The smaller the p-value, the less trustworthy the prediction. For highly non-normal X properties (e.g., fingerprints), the MD p-value is wildly inaccurate.

## Structural Similar Compounds

| Name               | Phenethyl Alcohol                             | Mexiletine .HCl (Free base form)   | Clenbuterol                        |
|--------------------|-----------------------------------------------|------------------------------------|------------------------------------|
| Structure          |                                               |                                    |                                    |
| Actual Endpoint    | Toxic                                         | Non-Toxic                          | Toxic                              |
| Predicted Endpoint | Toxic                                         | Non-Toxic                          | Toxic                              |
| Distance           | 0.514                                         | 0.540                              | 0.621                              |
| Reference          | J Toxicol Environ Health 12(2-3):235-44; 1983 | Iyakuhi Kenkyu 14(4):550-570; 1983 | Iyakuhi Kenkyu 15(4):597-613; 1984 |

## Model Applicability

Unknown features are fingerprint features in the query molecule, but not found or appearing too infrequently in the training set.

1. All properties and OPS components are within expected ranges.

## Feature Contribution

### Top features for positive contribution

| Fingerprint | Bit/Smiles | Feature Structure                                                    | Score | Toxic in training set |
|-------------|------------|----------------------------------------------------------------------|-------|-----------------------|
| SCFP_6      | 1702724181 | <p>AND Enantiomer</p> <p><chem>[*]C([*])[C@H](O)[C@H](N)C</chem></p> | 0.558 | 9 out of 9            |

|                                        |             |                                                                                                                                                                            |         |                       |
|----------------------------------------|-------------|----------------------------------------------------------------------------------------------------------------------------------------------------------------------------|---------|-----------------------|
| SCFP_6                                 | -561151481  | <p>AND Enantiomer</p> 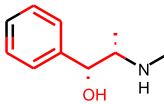 <p>[*]C([*])(C@H)(O)[c]1<br/>:[cH]:[cH]:[*]:[cH]:<br/>[cH]:1</p> | 0.523   | 6 out of 6            |
| SCFP_6                                 | 1318513260  | <p>AND Enantiomer</p>  <p>[*]N(C@@H)(C)C@H)(O)<br/>[c](:[cH]:[*]):[cH]:<br/>[*]</p>     | 0.478   | 4 out of 4            |
| Top Features for negative contribution |             |                                                                                                                                                                            |         |                       |
| Fingerprint                            | Bit/Smiles  | Feature Structure                                                                                                                                                          | Score   | Toxic in training set |
| SCFP_6                                 | -1379591900 | <p>AND Enantiomer</p>  <p>[*][c]1:[*]:[cH]:[cH]<br/>:[cH]:[cH]:1</p>                    | -0.282  | 33 out of 84          |
| SCFP_6                                 | 1653911926  | <p>AND Enantiomer</p>  <p>[*][c]1:[cH]:[cH]:[cH]<br/>:[cH]:[cH]:1</p>                 | -0.188  | 12 out of 28          |
| SCFP_6                                 | -1631132401 | <p>AND Enantiomer</p>  <p>[*]C([*])[c]1:[cH]:[cH]:[cH]:[cH]:[cH]:[cH]:1</p>           | -0.0973 | 8 out of 17           |



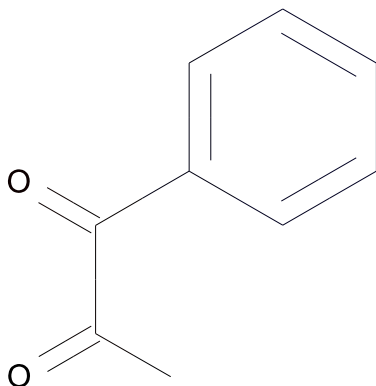C<sub>9</sub>H<sub>8</sub>O<sub>2</sub>

Molecular Weight: 148.159

ALogP: 1.446

Rotatable Bonds: 2

Acceptors: 2

Donors: 0

## Model Prediction

Prediction: Non-Toxic

Probability: 0.514

Enrichment: 0.977

Bayesian Score: -0.907

Mahalanobis Distance: 7.79

Mahalanobis Distance p-value: 0.705

Prediction: Positive if the Bayesian score is above the estimated best cutoff value from minimizing the false positive and false negative rate.

Probability: The estimated probability that the sample is in the positive category. This assumes that the Bayesian score follows a normal distribution and is different from the prediction using a cutoff.

Enrichment: An estimate of enrichment, that is, the increased likelihood (versus random) of this sample being in the category.

Bayesian Score: The standard Laplacian-modified Bayesian score.

Mahalanobis Distance: The Mahalanobis distance (MD) is the distance to the center of the training data. The larger the MD, the less trustworthy the prediction.

Mahalanobis Distance p-value: The p-value gives the fraction of training data with an MD greater than or equal to the one for the given sample, assuming normally distributed data. The smaller the p-value, the less trustworthy the prediction. For highly non-normal X properties (e.g., fingerprints), the MD p-value is wildly inaccurate.

## Structural Similar Compounds

| Name               | Ethyl Acrylate                          | Methylisobutylketone                | 2;2'-Dipyridyl               |
|--------------------|-----------------------------------------|-------------------------------------|------------------------------|
| Structure          |                                         |                                     |                              |
| Actual Endpoint    | Non-Toxic                               | Toxic                               | Toxic                        |
| Predicted Endpoint | Toxic                                   | Toxic                               | Non-Toxic                    |
| Distance           | 0.530                                   | 0.558                               | 0.558                        |
| Reference          | Toxicol Appl Pharmacol 60:106-111; 1981 | Fundam Appl Toxicol 8:310-327; 1987 | Teratology 18(1):63-70; 1978 |

## Model Applicability

Unknown features are fingerprint features in the query molecule, but not found or appearing too infrequently in the training set.

1. All properties and OPS components are within expected ranges.

## Feature Contribution

### Top features for positive contribution

| Fingerprint | Bit/Smiles  | Feature Structure                           | Score | Toxic in training set |
|-------------|-------------|---------------------------------------------|-------|-----------------------|
| SCFP_6      | -1980302127 | <br><chem>[*]C(=[*])C(=O)[c]([*])[*]</chem> | 0.25  | 5 out of 7            |

| SCFP_6                                 | -2056718782 | 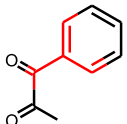<br><chem>[*]C(=[*])[c](:[cH]:[*]):[cH]:[*]</chem>    | 0.0786 | 33 out of 58          |
|----------------------------------------|-------------|------------------------------------------------------------------------------------------------------------------------------------------|--------|-----------------------|
| Top Features for negative contribution |             |                                                                                                                                          |        |                       |
| Fingerprint                            | Bit/Smiles  | Feature Structure                                                                                                                        | Score  | Toxic in training set |
| SCFP_6                                 | -1379591900 | <br><chem>[*][c]1:[*]:[cH]:[cH]:[cH]:[cH]:1</chem>    | -0.282 | 33 out of 84          |
| SCFP_6                                 | 1649310982  | <br><chem>[*]C(=[*])[c]1:[cH]:[cH]:[cH]:[cH]:1</chem> | -0.212 | 10 out of 24          |
| SCFP_6                                 | 1653911926  | <br><chem>[*][c]1:[cH]:[cH]:[cH]:[cH]:[cH]:1</chem>  | -0.188 | 12 out of 28          |

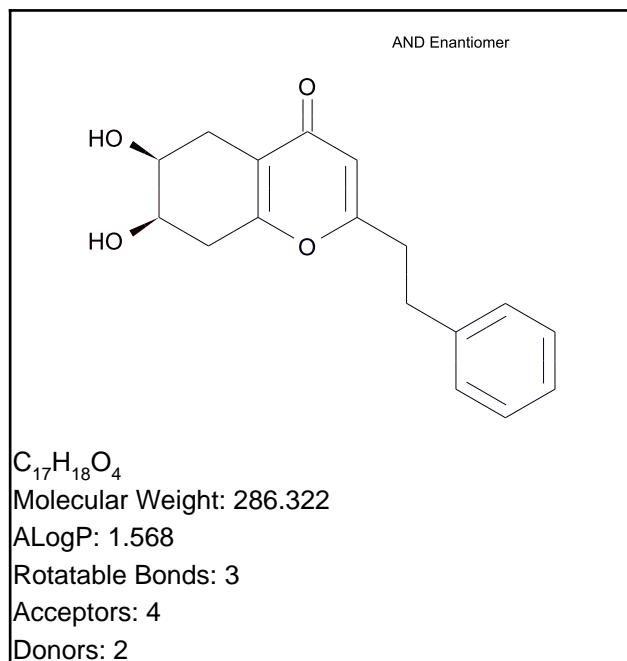

## Model Prediction

**Prediction: Toxic**

Probability: 0.546

Enrichment: 1.04

Bayesian Score: -0.0291

Mahalanobis Distance: 11

Mahalanobis Distance p-value: 0.00128

Prediction: Positive if the Bayesian score is above the estimated best cutoff value from minimizing the false positive and false negative rate.

Probability: The estimated probability that the sample is in the positive category. This assumes that the Bayesian score follows a normal distribution and is different from the prediction using a cutoff.

Enrichment: An estimate of enrichment, that is, the increased likelihood (versus random) of this sample being in the category.

Bayesian Score: The standard Laplacian-modified Bayesian score.

Mahalanobis Distance: The Mahalanobis distance (MD) is the distance to the center of the training data. The larger the MD, the less trustworthy the prediction.

Mahalanobis Distance p-value: The p-value gives the fraction of training data with an MD greater than or equal to the one for the given sample, assuming normally distributed data. The smaller the p-value, the less trustworthy the prediction. For highly non-normal X properties (e.g., fingerprints), the MD p-value is wildly inaccurate.

## Structural Similar Compounds

| Name               | Sulfonylurea Gliclazide                                                             | Cyclopiazonic Acid                                                                  | N-(3-Piperidyl)3,4,5-trimethoxybenzamide                                            |
|--------------------|-------------------------------------------------------------------------------------|-------------------------------------------------------------------------------------|-------------------------------------------------------------------------------------|
| Structure          | 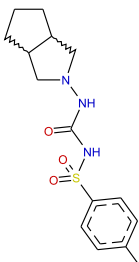 |  |  |
| Actual Endpoint    | Toxic                                                                               | Non-Toxic                                                                           | Toxic                                                                               |
| Predicted Endpoint | Toxic                                                                               | Non-Toxic                                                                           | Toxic                                                                               |
| Distance           | 0.536                                                                               | 0.591                                                                               | 0.603                                                                               |
| Reference          | Yakuri to Chiryo 9:3551-3571; 1981                                                  | J Toxicol Environ Health 14:585-594; 1984                                           | Kiso to Rinsho 18:91-101; 1984                                                      |

## Model Applicability

Unknown features are fingerprint features in the query molecule, but not found or appearing too infrequently in the training set.

1. All properties and OPS components are within expected ranges.

## Feature Contribution

### Top features for positive contribution

| Fingerprint | Bit/Smiles  | Feature Structure                                                                                                                                                    | Score | Toxic in training set |
|-------------|-------------|----------------------------------------------------------------------------------------------------------------------------------------------------------------------|-------|-----------------------|
| SCFP_6      | -1971196727 | <p style="text-align: center;">AND Enantiomer</p> 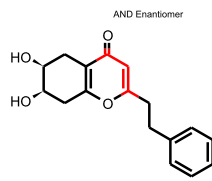 <p>[*]C(=CC(=[*])[*])[*]</p> | 0.293 | 13 out of 18          |

|                                        |             |                                                                                                                                                           |        |                       |
|----------------------------------------|-------------|-----------------------------------------------------------------------------------------------------------------------------------------------------------|--------|-----------------------|
| SCFP_6                                 | -424515134  | <p>AND Enantiomer</p> 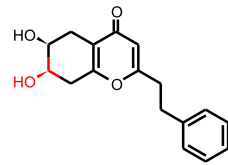 <p>[*]C([*])O</p>                               | 0.275  | 39 out of 56          |
| SCFP_6                                 | -1211866396 | <p>AND Enantiomer</p>  <p>[*]CC[c]1:[cH]:[cH]:[cH]:[*]:[cH]:[cH]:1</p> | 0.21   | 8 out of 12           |
| Top Features for negative contribution |             |                                                                                                                                                           |        |                       |
| Fingerprint                            | Bit/Smiles  | Feature Structure                                                                                                                                         | Score  | Toxic in training set |
| SCFP_6                                 | 616547045   | <p>AND Enantiomer</p>  <p>[*]C\C(=C\[*])\O[*]</p>                      | -0.438 | 1 out of 4            |
| SCFP_6                                 | -1379591900 | <p>AND Enantiomer</p>  <p>[*][c]1:[*]:[cH]:[cH]:[cH]:[cH]:[cH]:1</p>  | -0.282 | 33 out of 84          |
| SCFP_6                                 | 55464376    | <p>AND Enantiomer</p>  <p>[*]CC(=C([*])([*])C(=[*])[*])</p>          | -0.252 | 1 out of 3            |

AND Enantiomer

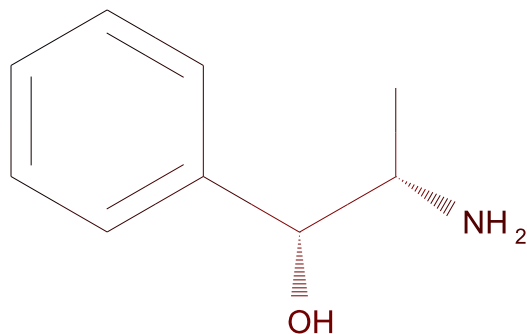C<sub>9</sub>H<sub>13</sub>NO

Molecular Weight: 151.206

ALogP: 0.802

Rotatable Bonds: 2

Acceptors: 2

Donors: 2

## Model Prediction

**Prediction: Toxic**

Probability: 0.638

Enrichment: 1.21

Bayesian Score: 2.33

Mahalanobis Distance: 8.88

Mahalanobis Distance p-value: 0.214

Prediction: Positive if the Bayesian score is above the estimated best cutoff value from minimizing the false positive and false negative rate.

Probability: The estimated probability that the sample is in the positive category. This assumes that the Bayesian score follows a normal distribution and is different from the prediction using a cutoff.

Enrichment: An estimate of enrichment, that is, the increased likelihood (versus random) of this sample being in the category.

Bayesian Score: The standard Laplacian-modified Bayesian score.

Mahalanobis Distance: The Mahalanobis distance (MD) is the distance to the center of the training data. The larger the MD, the less trustworthy the prediction.

Mahalanobis Distance p-value: The p-value gives the fraction of training data with an MD greater than or equal to the one for the given sample, assuming normally distributed data. The smaller the p-value, the less trustworthy the prediction. For highly non-normal X properties (e.g., fingerprints), the MD p-value is wildly inaccurate.

## Structural Similar Compounds

| Name               | Phenethyl Alcohol                             | 2-Methylresorcinol                  | Mexiletine .HCl (Free base form)   |
|--------------------|-----------------------------------------------|-------------------------------------|------------------------------------|
| Structure          |                                               |                                     |                                    |
| Actual Endpoint    | Toxic                                         | Non-Toxic                           | Non-Toxic                          |
| Predicted Endpoint | Toxic                                         | Non-Toxic                           | Non-Toxic                          |
| Distance           | 0.557                                         | 0.560                               | 0.592                              |
| Reference          | J Toxicol Environ Health 12(2-3):235-44; 1983 | Fundam Appl Toxicol 7:293-298; 1986 | Iyakuhi Kenkyu 14(4):550-570; 1983 |

## Model Applicability

Unknown features are fingerprint features in the query molecule, but not found or appearing too infrequently in the training set.

1. All properties and OPS components are within expected ranges.

## Feature Contribution

### Top features for positive contribution

| Fingerprint | Bit/Smiles | Feature Structure                                                     | Score | Toxic in training set |
|-------------|------------|-----------------------------------------------------------------------|-------|-----------------------|
| SCFP_6      | 1702724181 | <p>AND Enantiomer</p> <p><chem>[*]C([*])[C@H](O)c([*])N[*]</chem></p> | 0.558 | 9 out of 9            |

|                                        |             |                                                                                                                                                                            |         |                       |
|----------------------------------------|-------------|----------------------------------------------------------------------------------------------------------------------------------------------------------------------------|---------|-----------------------|
| SCFP_6                                 | -561151481  | <p>AND Enantiomer</p> 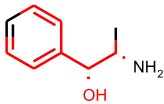 <p>[*]C([*])(C@H)(O)[c]1<br/>:[cH]:[cH]:[*]:[cH]:<br/>[cH]:1</p> | 0.523   | 6 out of 6            |
| SCFP_6                                 | 1318513260  | <p>AND Enantiomer</p>  <p>[*]N[C@@H](C)[C@H](O)<br/>[c](:[cH]:[*]):[cH]:<br/>[*]</p>    | 0.478   | 4 out of 4            |
| Top Features for negative contribution |             |                                                                                                                                                                            |         |                       |
| Fingerprint                            | Bit/Smiles  | Feature Structure                                                                                                                                                          | Score   | Toxic in training set |
| SCFP_6                                 | -1379591900 | <p>AND Enantiomer</p>  <p>[*][c]1:[*]:[cH]:[cH]<br/>:[cH]:[cH]:1</p>                    | -0.282  | 33 out of 84          |
| SCFP_6                                 | 1653911926  | <p>AND Enantiomer</p>  <p>[*][c]1:[cH]:[cH]:[cH]<br/>:[cH]:[cH]:1</p>                 | -0.188  | 12 out of 28          |
| SCFP_6                                 | -1631132401 | <p>AND Enantiomer</p>  <p>[*]C([*])[c]1:[cH]:[cH]:[cH]:[cH]:[cH]:1</p>                | -0.0973 | 8 out of 17           |

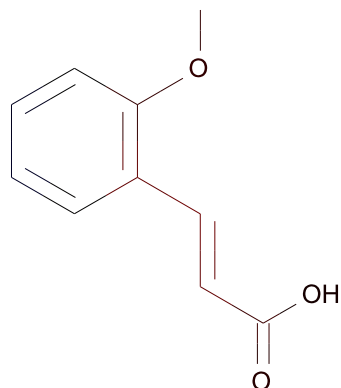C<sub>10</sub>H<sub>10</sub>O<sub>3</sub>

Molecular Weight: 178.185

ALogP: 1.911

Rotatable Bonds: 3

Acceptors: 3

Donors: 1

## Model Prediction

**Prediction: Toxic**

Probability: 0.625

Enrichment: 1.19

Bayesian Score: 1.99

Mahalanobis Distance: 9.21

Mahalanobis Distance p-value: 0.122

Prediction: Positive if the Bayesian score is above the estimated best cutoff value from minimizing the false positive and false negative rate.

Probability: The estimated probability that the sample is in the positive category. This assumes that the Bayesian score follows a normal distribution and is different from the prediction using a cutoff.

Enrichment: An estimate of enrichment, that is, the increased likelihood (versus random) of this sample being in the category.

Bayesian Score: The standard Laplacian-modified Bayesian score.

Mahalanobis Distance: The Mahalanobis distance (MD) is the distance to the center of the training data. The larger the MD, the less trustworthy the prediction.

Mahalanobis Distance p-value: The p-value gives the fraction of training data with an MD greater than or equal to the one for the given sample, assuming normally distributed data. The smaller the p-value, the less trustworthy the prediction. For highly non-normal X properties (e.g., fingerprints), the MD p-value is wildly inaccurate.

## Structural Similar Compounds

| Name               | Carbaryl                                  | Mexiletine .HCl (Free base form)   | Trichloroacetic Acid        |
|--------------------|-------------------------------------------|------------------------------------|-----------------------------|
| Structure          |                                           |                                    |                             |
| Actual Endpoint    | Non-Toxic                                 | Non-Toxic                          | Toxic                       |
| Predicted Endpoint | Non-Toxic                                 | Non-Toxic                          | Non-Toxic                   |
| Distance           | 0.540                                     | 0.562                              | 0.570                       |
| Reference          | Toxicol Appl Pharmacol 26(4):621-38; 1973 | Iyakuin Kenkyu 14(4):550-570; 1983 | Teratology 40:445-451; 1989 |

## Model Applicability

Unknown features are fingerprint features in the query molecule, but not found or appearing too infrequently in the training set.

1. All properties and OPS components are within expected ranges.

## Feature Contribution

### Top features for positive contribution

| Fingerprint | Bit/Smiles  | Feature Structure                              | Score | Toxic in training set |
|-------------|-------------|------------------------------------------------|-------|-----------------------|
| SCFP_6      | -1977229858 | <br><chem>[*]C(=[*])C=C\c1c([*]cH)[*]c1</chem> | 0.478 | 4 out of 4            |

| SCFP_6                                 | -1971137145 | 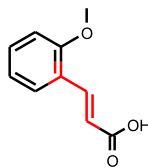<br><chem>[*]C=C\[c]([*]):[*]</chem>                        | 0.431  | 7 out of 8            |
|----------------------------------------|-------------|------------------------------------------------------------------------------------------------------------------------------------------------|--------|-----------------------|
| SCFP_6                                 | 591469355   | <br><chem>[*][c]([*]):[c](OC):[cH]:[*]</chem>               | 0.411  | 10 out of 12          |
| Top Features for negative contribution |             |                                                                                                                                                |        |                       |
| Fingerprint                            | Bit/Smiles  | Feature Structure                                                                                                                              | Score  | Toxic in training set |
| SCFP_6                                 | 1652428703  | <br><chem>[*]O[c]1:[cH]:[cH]:[cH]:[cH]:[cH]:[c]:1[*]</chem> | -0.438 | 1 out of 4            |
| SCFP_6                                 | -424485343  | <br><chem>[*]C(=[*])O</chem>                               | -0.328 | 19 out of 51          |
| SCFP_6                                 | -1379591900 | <br><chem>[*][c]1:[*]:[cH]:[cH]:[cH]:[cH]:1</chem>        | -0.282 | 33 out of 84          |



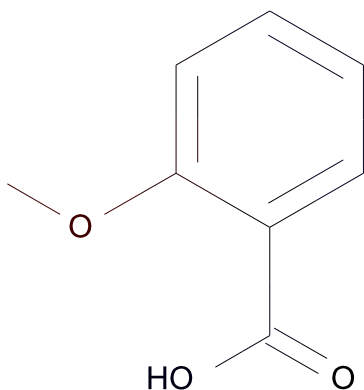C<sub>8</sub>H<sub>8</sub>O<sub>3</sub>

Molecular Weight: 152.147

ALogP: 1.443

Rotatable Bonds: 2

Acceptors: 3

Donors: 1

## Model Prediction

**Prediction: Toxic**

Probability: 0.558

Enrichment: 1.06

Bayesian Score: 0.278

Mahalanobis Distance: 8.01

Mahalanobis Distance p-value: 0.602

Prediction: Positive if the Bayesian score is above the estimated best cutoff value from minimizing the false positive and false negative rate.

Probability: The estimated probability that the sample is in the positive category. This assumes that the Bayesian score follows a normal distribution and is different from the prediction using a cutoff.

Enrichment: An estimate of enrichment, that is, the increased likelihood (versus random) of this sample being in the category.

Bayesian Score: The standard Laplacian-modified Bayesian score.

Mahalanobis Distance: The Mahalanobis distance (MD) is the distance to the center of the training data. The larger the MD, the less trustworthy the prediction.

Mahalanobis Distance p-value: The p-value gives the fraction of training data with an MD greater than or equal to the one for the given sample, assuming normally distributed data. The smaller the p-value, the less trustworthy the prediction. For highly non-normal X properties (e.g., fingerprints), the MD p-value is wildly inaccurate.

## Structural Similar Compounds

| Name               | Trichloroacetic Acid        | 3;6-Dichloropicolinic Acid        | 11-oxo-11H-Pyrido(2;1-b)quinazoline-2-carboxylic Acid |
|--------------------|-----------------------------|-----------------------------------|-------------------------------------------------------|
| Structure          |                             |                                   |                                                       |
| Actual Endpoint    | Toxic                       | Non-Toxic                         | Toxic                                                 |
| Predicted Endpoint | Non-Toxic                   | Non-Toxic                         | Toxic                                                 |
| Distance           | 0.490                       | 0.519                             | 0.565                                                 |
| Reference          | Teratology 40:445-451; 1989 | Fundam Appl Toxicol 4:91-97; 1984 | Teratology 38(4):351-67; 1988                         |

## Model Applicability

Unknown features are fingerprint features in the query molecule, but not found or appearing too infrequently in the training set.

1. All properties and OPS components are within expected ranges.

## Feature Contribution

| Top features for positive contribution |            |                                                |       |                       |
|----------------------------------------|------------|------------------------------------------------|-------|-----------------------|
| Fingerprint                            | Bit/Smiles | Feature Structure                              | Score | Toxic in training set |
| SCFP_6                                 | 591469355  | <br><chem>[*][c](:[*]):[c](OC):[cH]:[*]</chem> | 0.411 | 10 out of 12          |

| SCFP_6                                 | 1627842774  | 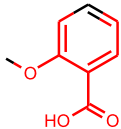<br><chem>[*]O[c]1:[cH]:[*]:[cH]:[cH]:[c]:1C(=O)O</chem> | 0.271  | 1 out of 1            |
|----------------------------------------|-------------|---------------------------------------------------------------------------------------------------------------------------------------------|--------|-----------------------|
| SCFP_6                                 | 136239834   | <br><chem>[*]OC</chem>                                   | 0.242  | 23 out of 34          |
| Top Features for negative contribution |             |                                                                                                                                             |        |                       |
| Fingerprint                            | Bit/Smiles  | Feature Structure                                                                                                                           | Score  | Toxic in training set |
| SCFP_6                                 | 1652428703  | <br><chem>[*]O[c]1:[cH]:[cH]:[cH]:[cH]:[c]:1[*]</chem>   | -0.438 | 1 out of 4            |
| SCFP_6                                 | -424485343  | <br><chem>[*]C(=[*])O</chem>                            | -0.328 | 19 out of 51          |
| SCFP_6                                 | -1379591900 | <br><chem>[*][c]1:[*]:[cH]:[cH]:[cH]:[cH]:1</chem>     | -0.282 | 33 out of 84          |

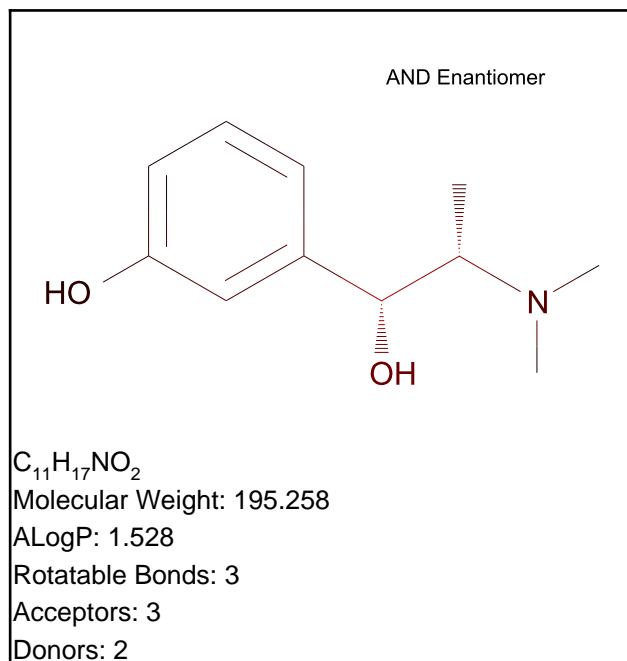

## Model Prediction

**Prediction: Toxic**

Probability: 0.686

Enrichment: 1.3

Bayesian Score: 3.55

Mahalanobis Distance: 10.6

Mahalanobis Distance p-value: 0.00397

Prediction: Positive if the Bayesian score is above the estimated best cutoff value from minimizing the false positive and false negative rate.

Probability: The estimated probability that the sample is in the positive category. This assumes that the Bayesian score follows a normal distribution and is different from the prediction using a cutoff.

Enrichment: An estimate of enrichment, that is, the increased likelihood (versus random) of this sample being in the category.

Bayesian Score: The standard Laplacian-modified Bayesian score.

Mahalanobis Distance: The Mahalanobis distance (MD) is the distance to the center of the training data. The larger the MD, the less trustworthy the prediction.

Mahalanobis Distance p-value: The p-value gives the fraction of training data with an MD greater than or equal to the one for the given sample, assuming normally distributed data. The smaller the p-value, the less trustworthy the prediction. For highly non-normal X properties (e.g., fingerprints), the MD p-value is wildly inaccurate.

## Structural Similar Compounds

| Name               | Mexiletine .HCl (Free base form)                                                    | Bisphenol a                                                                         | Clenbuterol                                                                         |
|--------------------|-------------------------------------------------------------------------------------|-------------------------------------------------------------------------------------|-------------------------------------------------------------------------------------|
| Structure          | 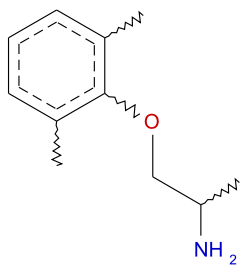 |  |  |
| Actual Endpoint    | Non-Toxic                                                                           | Non-Toxic                                                                           | Toxic                                                                               |
| Predicted Endpoint | Non-Toxic                                                                           | Non-Toxic                                                                           | Toxic                                                                               |
| Distance           | 0.546                                                                               | 0.586                                                                               | 0.599                                                                               |
| Reference          | Iyakuin Kenkyu 14(4):550-570; 1983                                                  | Fundam Appl Toxicol 8:571-582; 1987                                                 | Iyakuin Kenkyu 15(4):597-613; 1984                                                  |

## Model Applicability

Unknown features are fingerprint features in the query molecule, but not found or appearing too infrequently in the training set.

1. All properties and OPS components are within expected ranges.

## Feature Contribution

### Top features for positive contribution

| Fingerprint | Bit/Smiles | Feature Structure                                                                                                                                                                                                  | Score | Toxic in training set |
|-------------|------------|--------------------------------------------------------------------------------------------------------------------------------------------------------------------------------------------------------------------|-------|-----------------------|
| SCFP_6      | 1702724181 | <p style="text-align: center;">AND Enantiomer</p> 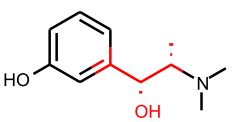 <p style="text-align: center;"><chem>[*]C([*])(C@H)(O)c([*])[*]</chem></p> | 0.558 | 9 out of 9            |

|                                        |             |                                                                                                                                                                            |        |                       |
|----------------------------------------|-------------|----------------------------------------------------------------------------------------------------------------------------------------------------------------------------|--------|-----------------------|
| SCFP_6                                 | -561151481  | <p>AND Enantiomer</p> 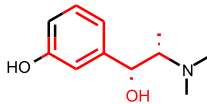 <p>[*]C([*])(C@H)(O)[c]1<br/>:[cH]:[cH]:[*]:[cH]:<br/>[cH]:1</p> | 0.523  | 6 out of 6            |
| SCFP_6                                 | 1318513260  | <p>AND Enantiomer</p>  <p>[*]N[C@@H](C)(C)[C@H](O)<br/>[c]:[cH]:[*]:[cH]:<br/>[*]</p>   | 0.478  | 4 out of 4            |
| Top Features for negative contribution |             |                                                                                                                                                                            |        |                       |
| Fingerprint                            | Bit/Smiles  | Feature Structure                                                                                                                                                          | Score  | Toxic in training set |
| SCFP_6                                 | 1434483901  | <p>AND Enantiomer</p>  <p>[*][c]1:[cH]:[cH]:[cH]<br/>:[c](O):[cH]:1</p>                 | -0.422 | 0 out of 1            |
| SCFP_6                                 | -1379591900 | <p>AND Enantiomer</p>  <p>[*][c]1:[*]:[cH]:[cH]<br/>:[cH]:[cH]:1</p>                  | -0.282 | 33 out of 84          |
| SCFP_6                                 | 3           | <p>AND Enantiomer</p>  <p>[*][c](:[*]):[*]</p>                                        | 0      | 92 out of 181         |

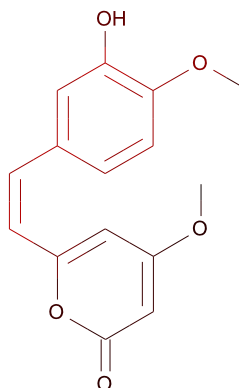C<sub>15</sub>H<sub>14</sub>O<sub>5</sub>

Molecular Weight: 274.269

ALogP: 1.969

Rotatable Bonds: 4

Acceptors: 5

Donors: 1

## Model Prediction

**Prediction: Toxic**

Probability: 0.8

Enrichment: 1.52

Bayesian Score: 6.7

Mahalanobis Distance: 9.67

Mahalanobis Distance p-value: 0.0466

Prediction: Positive if the Bayesian score is above the estimated best cutoff value from minimizing the false positive and false negative rate.

Probability: The estimated probability that the sample is in the positive category. This assumes that the Bayesian score follows a normal distribution and is different from the prediction using a cutoff.

Enrichment: An estimate of enrichment, that is, the increased likelihood (versus random) of this sample being in the category.

Bayesian Score: The standard Laplacian-modified Bayesian score.

Mahalanobis Distance: The Mahalanobis distance (MD) is the distance to the center of the training data. The larger the MD, the less trustworthy the prediction.

Mahalanobis Distance p-value: The p-value gives the fraction of training data with an MD greater than or equal to the one for the given sample, assuming normally distributed data. The smaller the p-value, the less trustworthy the prediction. For highly non-normal X properties (e.g., fingerprints), the MD p-value is wildly inaccurate.

## Structural Similar Compounds

| Name               | N-(3-Piperidyl)3;4;5-trimethoxybenzamide | Triclopyr                           | Tiaramide .HCl (Free base form)         |
|--------------------|------------------------------------------|-------------------------------------|-----------------------------------------|
| Structure          |                                          |                                     |                                         |
| Actual Endpoint    | Toxic                                    | Non-Toxic                           | Toxic                                   |
| Predicted Endpoint | Toxic                                    | Non-Toxic                           | Toxic                                   |
| Distance           | 0.573                                    | 0.580                               | 0.587                                   |
| Reference          | Kiso to Rinsho 18:91-101; 1984           | Fundam Appl Toxicol 4:872-882; 1984 | Arzneimittelforschung 23(4):504-8; 1973 |

## Model Applicability

Unknown features are fingerprint features in the query molecule, but not found or appearing too infrequently in the training set.

1. All properties and OPS components are within expected ranges.

## Feature Contribution

### Top features for positive contribution

| Fingerprint | Bit/Smiles | Feature Structure                                       | Score | Toxic in training set |
|-------------|------------|---------------------------------------------------------|-------|-----------------------|
| SCFP_6      | 2116304939 | <br><chem>[*]O[c]1:[cH]:[*]:[c]([*]):[cH]:[c]:1O</chem> | 0.504 | 5 out of 5            |

| SCFP_6                                 | -538866216  | 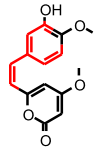<br><chem>[*]C=C/[c]1:[cH]:[cH]:[c]([*]):[c]([*]):[cH]:1</chem>       | 0.478  | 4 out of 4            |
|----------------------------------------|-------------|----------------------------------------------------------------------------------------------------------------------------------------------------------|--------|-----------------------|
| SCFP_6                                 | -1977229858 | <br><chem>[*]C(=[*])C=C/[c]([*]):[cH]:[c]([*]):[c]([*]):[cH]:1</chem> | 0.478  | 4 out of 4            |
| Top Features for negative contribution |             |                                                                                                                                                          |        |                       |
| Fingerprint                            | Bit/Smiles  | Feature Structure                                                                                                                                        | Score  | Toxic in training set |
| SCFP_6                                 | 1132907712  | <br><chem>[*]=CC(=O)O</chem>                                          | -0.184 | 9 out of 21           |
| SCFP_6                                 | 12          | <br><chem>[*]O</chem>                                                | 0      | 97 out of 178         |
| SCFP_6                                 | 1           | <br><chem>[*]C(=[*])[*]</chem>                                      | 0      | 90 out of 173         |

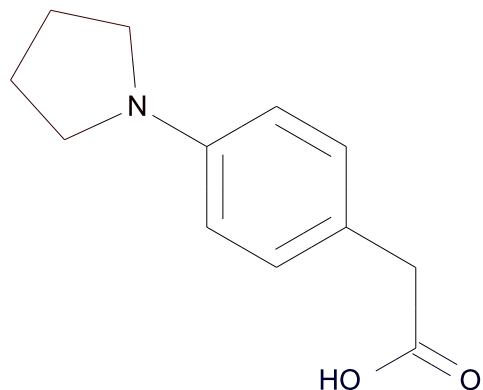

$C_{12}H_{15}NO_2$

Molecular Weight: 205.253

ALogP: 2.117

Rotatable Bonds: 3

Acceptors: 3

Donors: 1

## Model Prediction

**Prediction: Toxic**

Probability: 0.546

Enrichment: 1.04

Bayesian Score: -0.0369

Mahalanobis Distance: 7.92

Mahalanobis Distance p-value: 0.647

Prediction: Positive if the Bayesian score is above the estimated best cutoff value from minimizing the false positive and false negative rate.

Probability: The estimated probability that the sample is in the positive category. This assumes that the Bayesian score follows a normal distribution and is different from the prediction using a cutoff.

Enrichment: An estimate of enrichment, that is, the increased likelihood (versus random) of this sample being in the category.

Bayesian Score: The standard Laplacian-modified Bayesian score.

Mahalanobis Distance: The Mahalanobis distance (MD) is the distance to the center of the training data. The larger the MD, the less trustworthy the prediction.

Mahalanobis Distance p-value: The p-value gives the fraction of training data with an MD greater than or equal to the one for the given sample, assuming normally distributed data. The smaller the p-value, the less trustworthy the prediction. For highly non-normal X properties (e.g., fingerprints), the MD p-value is wildly inaccurate.

## Structural Similar Compounds

| Name               | Pirprofen                         | Miroprofen                      | Mexiletine .HCl (Free base form)   |
|--------------------|-----------------------------------|---------------------------------|------------------------------------|
| Structure          |                                   |                                 |                                    |
| Actual Endpoint    | Non-Toxic                         | Non-Toxic                       | Non-Toxic                          |
| Predicted Endpoint | Non-Toxic                         | Non-Toxic                       | Non-Toxic                          |
| Distance           | 0.482                             | 0.515                           | 0.528                              |
| Reference          | Kiso to Rinsho 18:5651-5673; 1984 | Iyakuin Kenkyu 12:808-826; 1981 | Iyakuin Kenkyu 14(4):550-570; 1983 |

## Model Applicability

Unknown features are fingerprint features in the query molecule, but not found or appearing too infrequently in the training set.

1. OPS PC8 out of range. Value: 4.9801. Training min, max, SD, explained variance: -3.1563, 4.7297, 1.569, 0.0361.

## Feature Contribution

| Top features for positive contribution |            |                                                       |       |                       |
|----------------------------------------|------------|-------------------------------------------------------|-------|-----------------------|
| Fingerprint                            | Bit/Smiles | Feature Structure                                     | Score | Toxic in training set |
| SCFP_6                                 | 1100167450 | <p>[*]C(=[*])C[c]1:[cH]:<br/>[cH]:[*]:[cH]:[cH]:1</p> | 0.441 | 3 out of 3            |

| SCFP_6                                 | 470101049   | 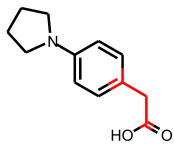<br><chem>[*]C(=[*])C[c](:[*]):</chem><br><chem>[*]</chem>                                      | 0.322  | 4 out of 5            |
|----------------------------------------|-------------|------------------------------------------------------------------------------------------------------------------------------------------------------------------------------------|--------|-----------------------|
| SCFP_6                                 | 1155241219  | <br><chem>[*]N1[*][*]CC1</chem>                                                                 | 0.302  | 11 out of 15          |
| Top Features for negative contribution |             |                                                                                                                                                                                    |        |                       |
| Fingerprint                            | Bit/Smiles  | Feature Structure                                                                                                                                                                  | Score  | Toxic in training set |
| SCFP_6                                 | -1380909229 | <br><chem>[*]N([*])[c]1:[cH]:[*]</chem><br><chem>]:[c]([*]):[cH]:[cH]</chem><br><chem>:1</chem> | -0.449 | 6 out of 19           |
| SCFP_6                                 | -1476721585 | <br><chem>[*]:[cH]:[c]([CC(=O)O)</chem><br><chem>: [cH]:[*]</chem>                             | -0.422 | 0 out of 1            |
| SCFP_6                                 | 1334669481  | <br><chem>[*]N([*])[c](:[cH]:[*]</chem><br><chem>]):[cH]:[*]</chem>                           | -0.355 | 10 out of 28          |



AND Enantiomer

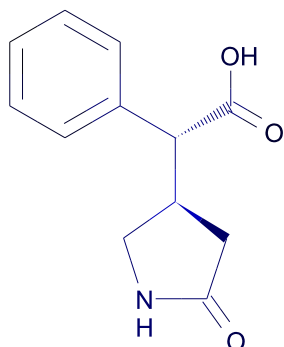C<sub>12</sub>H<sub>13</sub>NO<sub>3</sub>

Molecular Weight: 219.237

ALogP: 0.621

Rotatable Bonds: 3

Acceptors: 3

Donors: 2

## Model Prediction

Prediction: Non-Toxic

Probability: 0.38

Enrichment: 0.723

Bayesian Score: -5.13

Mahalanobis Distance: 11.3

Mahalanobis Distance p-value: 0.000431

Prediction: Positive if the Bayesian score is above the estimated best cutoff value from minimizing the false positive and false negative rate.

Probability: The estimated probability that the sample is in the positive category. This assumes that the Bayesian score follows a normal distribution and is different from the prediction using a cutoff.

Enrichment: An estimate of enrichment, that is, the increased likelihood (versus random) of this sample being in the category.

Bayesian Score: The standard Laplacian-modified Bayesian score.

Mahalanobis Distance: The Mahalanobis distance (MD) is the distance to the center of the training data. The larger the MD, the less trustworthy the prediction.

Mahalanobis Distance p-value: The p-value gives the fraction of training data with an MD greater than or equal to the one for the given sample, assuming normally distributed data. The smaller the p-value, the less trustworthy the prediction. For highly non-normal X properties (e.g., fingerprints), the MD p-value is wildly inaccurate.

## Structural Similar Compounds

| Name               | Bropiramine                 | Sulfonylurea Glucilazide           | Trichloroacetic Acid        |
|--------------------|-----------------------------|------------------------------------|-----------------------------|
| Structure          |                             |                                    |                             |
| Actual Endpoint    | Non-Toxic                   | Toxic                              | Toxic                       |
| Predicted Endpoint | Non-Toxic                   | Toxic                              | Non-Toxic                   |
| Distance           | 0.581                       | 0.624                              | 0.627                       |
| Reference          | Teratology 38(1):7-14; 1988 | Yakuri to Chiryo 9:3551-3571; 1981 | Teratology 40:445-451; 1989 |

## Model Applicability

Unknown features are fingerprint features in the query molecule, but not found or appearing too infrequently in the training set.

1. All properties and OPS components are within expected ranges.

## Feature Contribution

### Top features for positive contribution

| Fingerprint | Bit/Smiles | Feature Structure                                        | Score | Toxic in training set |
|-------------|------------|----------------------------------------------------------|-------|-----------------------|
| SCFP_6      | 1983581611 | <br><chem>[*]C([*])(C@@H)(C(=O)O)N1CC[C@H]1C(=O)O</chem> | 0.271 | 1 out of 1            |

|                                        |             |                                                                                                                                                                           |        |                       |
|----------------------------------------|-------------|---------------------------------------------------------------------------------------------------------------------------------------------------------------------------|--------|-----------------------|
| SCFP_6                                 | 9           | <p>AND Enantiomer</p> 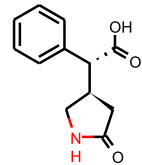 <p>[*]N[*]</p>                                                  | 0.0928 | 45 out of 78          |
| SCFP_6                                 | -1272768868 | <p>AND Enantiomer</p>  <p>[*]C([*])CC(=[*])[*]</p>                                     | 0.0607 | 14 out of 25          |
| Top Features for negative contribution |             |                                                                                                                                                                           |        |                       |
| Fingerprint                            | Bit/Smiles  | Feature Structure                                                                                                                                                         | Score  | Toxic in training set |
| SCFP_6                                 | -1214451192 | <p>AND Enantiomer</p>  <p>[*]C([*])[C@@H](C(=[*])[*])[*]1[cH]:[cH]:[*]:[cH]:[cH].1</p> | -0.849 | 1 out of 7            |
| SCFP_6                                 | 413428563   | <p>AND Enantiomer</p>  <p>[*]C([*])[C@@H](C(=O)O)[*]1[*]:[cH]:[cH].1</p>              | -0.729 | 1 out of 6            |
| SCFP_6                                 | -1047009138 | <p>AND Enantiomer</p>  <p>[*][C@@H]1CNC(=O)C1</p>                                    | -0.718 | 0 out of 2            |

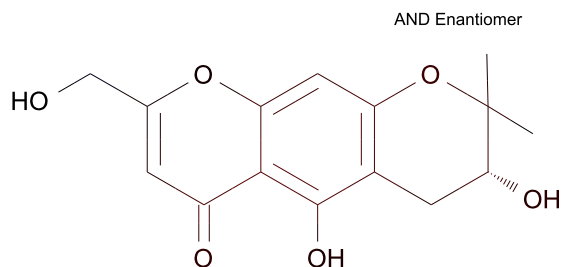C<sub>15</sub>H<sub>16</sub>O<sub>6</sub>

Molecular Weight: 292.284

ALogP: 0.901

Rotatable Bonds: 1

Acceptors: 6

Donors: 3

## Model Prediction

**Prediction: Toxic**

Probability: 0.656

Enrichment: 1.25

Bayesian Score: 2.79

Mahalanobis Distance: 12.5

Mahalanobis Distance p-value: 3.28e-006

Prediction: Positive if the Bayesian score is above the estimated best cutoff value from minimizing the false positive and false negative rate.

Probability: The estimated probability that the sample is in the positive category. This assumes that the Bayesian score follows a normal distribution and is different from the prediction using a cutoff.

Enrichment: An estimate of enrichment, that is, the increased likelihood (versus random) of this sample being in the category.

Bayesian Score: The standard Laplacian-modified Bayesian score.

Mahalanobis Distance: The Mahalanobis distance (MD) is the distance to the center of the training data. The larger the MD, the less trustworthy the prediction.

Mahalanobis Distance p-value: The p-value gives the fraction of training data with an MD greater than or equal to the one for the given sample, assuming normally distributed data. The smaller the p-value, the less trustworthy the prediction. For highly non-normal X properties (e.g., fingerprints), the MD p-value is wildly inaccurate.

## Structural Similar Compounds

| Name               | Piroxicam                          | Dexamethasone                                 | Caffeic Acid                              |
|--------------------|------------------------------------|-----------------------------------------------|-------------------------------------------|
| Structure          |                                    |                                               |                                           |
| Actual Endpoint    | Toxic                              | Non-Toxic                                     | Toxic                                     |
| Predicted Endpoint | Toxic                              | Toxic                                         | Toxic                                     |
| Distance           | 0.628                              | 0.667                                         | 0.672                                     |
| Reference          | Yakuri to Chiryo 8:4655-4671; 1980 | Preclin Rep Cent Inst Exp Anim 8:95-115; 1982 | Toxicol Appl Pharmacol 36(2):227-37; 1976 |

## Model Applicability

Unknown features are fingerprint features in the query molecule, but not found or appearing too infrequently in the training set.

1. All properties and OPS components are within expected ranges.

## Feature Contribution

### Top features for positive contribution

| Fingerprint | Bit/Smiles  | Feature Structure                                            | Score | Toxic in training set |
|-------------|-------------|--------------------------------------------------------------|-------|-----------------------|
| SCFP_6      | -1849894309 | <br><chem>*[c]([*]):[c]1C[C@@H](O)C([*])([*])[c]:1[*]</chem> | 0.381 | 2 out of 2            |

| SCFP_6                                 | -617610981 | <p>AND Enantiomer</p> 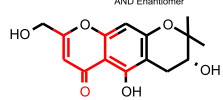 <p>[*][c](:[*]):[c]1C(=O)<br/>)C=C([*])[*][c]:1:[*]<br/>]</p>   | 0.381  | 2 out of 2            |
|----------------------------------------|------------|---------------------------------------------------------------------------------------------------------------------------------------------------------------------------|--------|-----------------------|
| SCFP_6                                 | 130348166  | <p>AND Enantiomer</p>  <p>[*]O[c]1:[cH]:[c](O[*]<br/>]):[c]([*]):[*]:[c]:<br/>1[*]</p> | 0.369  | 5 out of 6            |
| Top Features for negative contribution |            |                                                                                                                                                                           |        |                       |
| Fingerprint                            | Bit/Smiles | Feature Structure                                                                                                                                                         | Score  | Toxic in training set |
| SCFP_6                                 | 616547045  | <p>AND Enantiomer</p>  <p>[*]C\C(=C\[*])\O[*]</p>                                      | -0.438 | 1 out of 4            |
| SCFP_6                                 | -711656408 | <p>AND Enantiomer</p>  <p>[*]C(=[*])CO</p>                                           | 0      | 7 out of 13           |
| SCFP_6                                 | 1311071855 | <p>AND Enantiomer</p>  <p>[*]C(=O)[*]</p>                                            | 0      | 72 out of 141         |

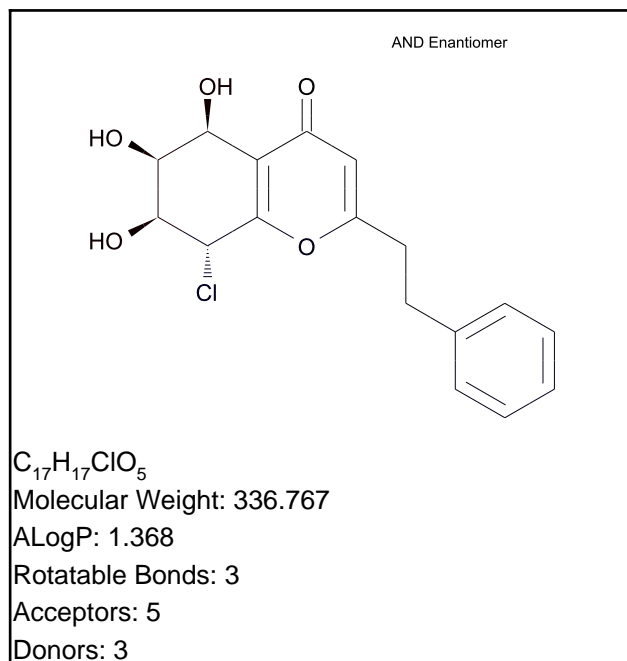

## Model Prediction

Prediction: Non-Toxic

Probability: 0.534

Enrichment: 1.02

Bayesian Score: -0.361

Mahalanobis Distance: 12.5

Mahalanobis Distance p-value: 3.71e-006

Prediction: Positive if the Bayesian score is above the estimated best cutoff value from minimizing the false positive and false negative rate.

Probability: The estimated probability that the sample is in the positive category. This assumes that the Bayesian score follows a normal distribution and is different from the prediction using a cutoff.

Enrichment: An estimate of enrichment, that is, the increased likelihood (versus random) of this sample being in the category.

Bayesian Score: The standard Laplacian-modified Bayesian score.

Mahalanobis Distance: The Mahalanobis distance (MD) is the distance to the center of the training data. The larger the MD, the less trustworthy the prediction.

Mahalanobis Distance p-value: The p-value gives the fraction of training data with an MD greater than or equal to the one for the given sample, assuming normally distributed data. The smaller the p-value, the less trustworthy the prediction. For highly non-normal X properties (e.g., fingerprints), the MD p-value is wildly inaccurate.

## Structural Similar Compounds

| Name               | Dexamethasone                                                                       | Diflorasone Diacetate                                                               | Sulfonylurea Gliclazide                                                             |
|--------------------|-------------------------------------------------------------------------------------|-------------------------------------------------------------------------------------|-------------------------------------------------------------------------------------|
| Structure          | 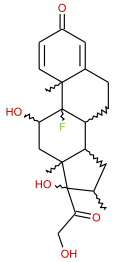 |  |  |
| Actual Endpoint    | Non-Toxic                                                                           | Toxic                                                                               | Toxic                                                                               |
| Predicted Endpoint | Toxic                                                                               | Toxic                                                                               | Toxic                                                                               |
| Distance           | 0.564                                                                               | 0.586                                                                               | 0.610                                                                               |
| Reference          | Preclin Rep Cent Inst Exp Anim 8:95-115; 1982                                       | Oyo Yakuri 28(2):207-224; 1984                                                      | Yakuri to Chiryo 9:3551-3571; 1981                                                  |

## Model Applicability

Unknown features are fingerprint features in the query molecule, but not found or appearing too infrequently in the training set.

1. All properties and OPS components are within expected ranges.

## Feature Contribution

### Top features for positive contribution

| Fingerprint | Bit/Smiles | Feature Structure                                                                                                                   | Score | Toxic in training set |
|-------------|------------|-------------------------------------------------------------------------------------------------------------------------------------|-------|-----------------------|
| SCFP_6      | 1702664599 | 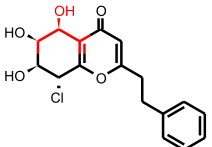<br><chem>[*]C([*])(C@@H)(O)C(=O)C([*])</chem> | 0.322 | 4 out of 5            |

|                                        |             |                                                                                                                                                           |        |                       |
|----------------------------------------|-------------|-----------------------------------------------------------------------------------------------------------------------------------------------------------|--------|-----------------------|
| SCFP_6                                 | -1971196727 | <p>AND Enantiomer</p> 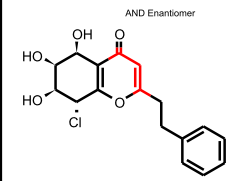 <p>[*]C(=CC(=[*])[*])[*])</p>                   | 0.293  | 13 out of 18          |
| SCFP_6                                 | -424515134  | <p>AND Enantiomer</p>  <p>[*]C([*])O</p>                               | 0.275  | 39 out of 56          |
| Top Features for negative contribution |             |                                                                                                                                                           |        |                       |
| Fingerprint                            | Bit/Smiles  | Feature Structure                                                                                                                                         | Score  | Toxic in training set |
| SCFP_6                                 | -52163885   | <p>AND Enantiomer</p>  <p>[*]C([*])Cl</p>                              | -0.496 | 6 out of 20           |
| SCFP_6                                 | 616547045   | <p>AND Enantiomer</p>  <p>[*]C\C(=C\[*])\O[*]</p>                     | -0.438 | 1 out of 4            |
| SCFP_6                                 | -1379591900 | <p>AND Enantiomer</p>  <p>[*][c]1:[*]:[cH]:[cH]<br/>:[cH]:[cH]:1</p> | -0.282 | 33 out of 84          |

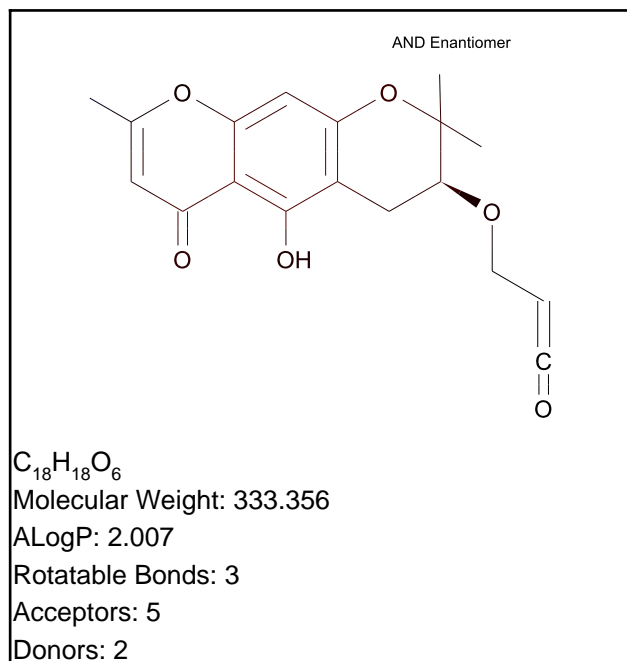

## Model Prediction

Prediction: Toxic

Probability: 0.658

Enrichment: 1.25

Bayesian Score: 2.84

Mahalanobis Distance: 13.3

Mahalanobis Distance p-value: 1.3e-007

Prediction: Positive if the Bayesian score is above the estimated best cutoff value from minimizing the false positive and false negative rate.

Probability: The estimated probability that the sample is in the positive category. This assumes that the Bayesian score follows a normal distribution and is different from the prediction using a cutoff.

Enrichment: An estimate of enrichment, that is, the increased likelihood (versus random) of this sample being in the category.

Bayesian Score: The standard Laplacian-modified Bayesian score.

Mahalanobis Distance: The Mahalanobis distance (MD) is the distance to the center of the training data. The larger the MD, the less trustworthy the prediction.

Mahalanobis Distance p-value: The p-value gives the fraction of training data with an MD greater than or equal to the one for the given sample, assuming normally distributed data. The smaller the p-value, the less trustworthy the prediction. For highly non-normal X properties (e.g., fingerprints), the MD p-value is wildly inaccurate.

## Structural Similar Compounds

| Name               | Sulfonylurea Gliclazide                                                             | D&C Yellow 8                                                                        | N-(3-Piperidyl)3,4,5-trimethoxybenzamide                                            |
|--------------------|-------------------------------------------------------------------------------------|-------------------------------------------------------------------------------------|-------------------------------------------------------------------------------------|
| Structure          | 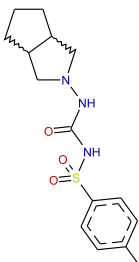 |  |  |
| Actual Endpoint    | Toxic                                                                               | Non-Toxic                                                                           | Toxic                                                                               |
| Predicted Endpoint | Toxic                                                                               | Non-Toxic                                                                           | Toxic                                                                               |
| Distance           | 0.539                                                                               | 0.551                                                                               | 0.613                                                                               |
| Reference          | Yakuri to Chiryo 9:3551-3571; 1981                                                  | Food Chem Toxicol 24:819-823; 1986                                                  | Kiso to Rinsho 18:91-101; 1984                                                      |

## Model Applicability

Unknown features are fingerprint features in the query molecule, but not found or appearing too infrequently in the training set.

1. All properties and OPS components are within expected ranges.

## Feature Contribution

### Top features for positive contribution

| Fingerprint | Bit/Smiles | Feature Structure                                                                                                                                | Score | Toxic in training set |
|-------------|------------|--------------------------------------------------------------------------------------------------------------------------------------------------|-------|-----------------------|
| SCFP_6      | -617610981 | 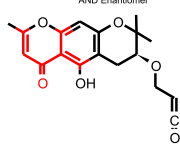<br><chem>[*][c](:[*]):[c]1C(=O)C=C([*])[*][c]:1:[*]</chem> | 0.381 | 2 out of 2            |

|                                        |             |                                                                                                                                                                 |         |                       |
|----------------------------------------|-------------|-----------------------------------------------------------------------------------------------------------------------------------------------------------------|---------|-----------------------|
| SCFP_6                                 | -1849894309 | <p>AND Enantiomer</p> 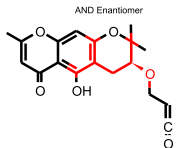 <p>[*][c](:[*]):[c]1C[C@H](O)C([*])([*])[c]:1:[*]</p> | 0.381   | 2 out of 2            |
| SCFP_6                                 | 130348166   | <p>AND Enantiomer</p>  <p>[*]O[c]1:[cH]:[c](O[*])[c]([*]):[*]:[c]:1[*]</p>   | 0.369   | 5 out of 6            |
| Top Features for negative contribution |             |                                                                                                                                                                 |         |                       |
| Fingerprint                            | Bit/Smiles  | Feature Structure                                                                                                                                               | Score   | Toxic in training set |
| SCFP_6                                 | 616547045   | <p>AND Enantiomer</p>  <p>[*]C\C(=C\[*])\O[*]</p>                            | -0.438  | 1 out of 4            |
| SCFP_6                                 | 136627117   | <p>AND Enantiomer</p>  <p>[*]C(=[*])C</p>                                   | -0.0885 | 10 out of 21          |
| SCFP_6                                 | 136597326   | <p>AND Enantiomer</p>  <p>[*]C([*])C</p>                                   | 0       | 50 out of 97          |



AND Enantiomer

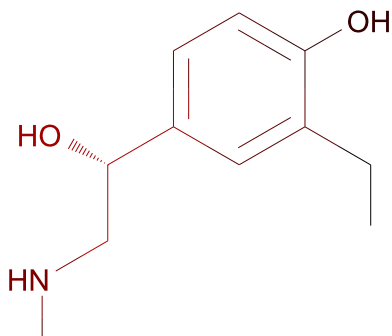C<sub>11</sub>H<sub>17</sub>NO<sub>2</sub>

Molecular Weight: 195.258

ALogP: 1.557

Rotatable Bonds: 4

Acceptors: 3

Donors: 3

## Model Prediction

Prediction: Toxic

Probability: 0.744

Enrichment: 1.41

Bayesian Score: 5.08

Mahalanobis Distance: 9.04

Mahalanobis Distance p-value: 0.164

Prediction: Positive if the Bayesian score is above the estimated best cutoff value from minimizing the false positive and false negative rate.

Probability: The estimated probability that the sample is in the positive category. This assumes that the Bayesian score follows a normal distribution and is different from the prediction using a cutoff.

Enrichment: An estimate of enrichment, that is, the increased likelihood (versus random) of this sample being in the category.

Bayesian Score: The standard Laplacian-modified Bayesian score.

Mahalanobis Distance: The Mahalanobis distance (MD) is the distance to the center of the training data. The larger the MD, the less trustworthy the prediction.

Mahalanobis Distance p-value: The p-value gives the fraction of training data with an MD greater than or equal to the one for the given sample, assuming normally distributed data. The smaller the p-value, the less trustworthy the prediction. For highly non-normal X properties (e.g., fingerprints), the MD p-value is wildly inaccurate.

## Structural Similar Compounds

| Name               | Clenbuterol                        | Procabazine .HCl (Free base form) | Ritodrine .HCl (Free base form)   |
|--------------------|------------------------------------|-----------------------------------|-----------------------------------|
| Structure          |                                    |                                   |                                   |
| Actual Endpoint    | Toxic                              | Toxic                             | Toxic                             |
| Predicted Endpoint | Toxic                              | Toxic                             | Toxic                             |
| Distance           | 0.491                              | 0.539                             | 0.567                             |
| Reference          | Iyakuin Kenkyu 15(4):597-613; 1984 | Teratology 2(1):23-31; 1969       | Kiso to Rinsho 19:2002-2018; 1985 |

## Model Applicability

Unknown features are fingerprint features in the query molecule, but not found or appearing too infrequently in the training set.

1. All properties and OPS components are within expected ranges.

## Feature Contribution

### Top features for positive contribution

| Fingerprint | Bit/Smiles | Feature Structure                                          | Score | Toxic in training set |
|-------------|------------|------------------------------------------------------------|-------|-----------------------|
| SCFP_6      | 1702724181 | <p>AND Enantiomer</p> <p>[*]C([*])C@H([O])[c]([*])[*])</p> | 0.558 | 9 out of 9            |

| SCFP_6                                 | -561151481  | <p>AND Enantiomer</p> 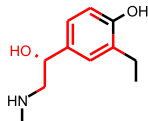 <p><chem>[*]C([*])[C@H](O)[c]1:[cH]:[cH]:[*]:[cH]:[cH]:1</chem></p>       | 0.523 | 6 out of 6            |
|----------------------------------------|-------------|-------------------------------------------------------------------------------------------------------------------------------------------------------------------------------------|-------|-----------------------|
| SCFP_6                                 | -1059390504 | <p>AND Enantiomer</p>  <p><chem>[*]NC[C@H](O)[c]([cH]1:[cH]:[cH]:[*]:[cH]:1):[cH]:[*]</chem></p> | 0.441 | 3 out of 3            |
| Top Features for negative contribution |             |                                                                                                                                                                                     |       |                       |
| Fingerprint                            | Bit/Smiles  | Feature Structure                                                                                                                                                                   | Score | Toxic in training set |
| SCFP_6                                 | -1931277081 | <p>AND Enantiomer</p>  <p><chem>[*]C[c]1:[cH]:[*]:[cH]:[cH]:[c]:1O</chem></p>                    | 0     | 1 out of 2            |
| SCFP_6                                 | 136597326   | <p>AND Enantiomer</p>  <p><chem>[*]C([*])C</chem></p>                                          | 0     | 50 out of 97          |
| SCFP_6                                 | -496409612  | <p>AND Enantiomer</p>  <p><chem>[*][c](:[*]):[cH]:[cH]:[*]</chem></p>                          | 0     | 82 out of 163         |

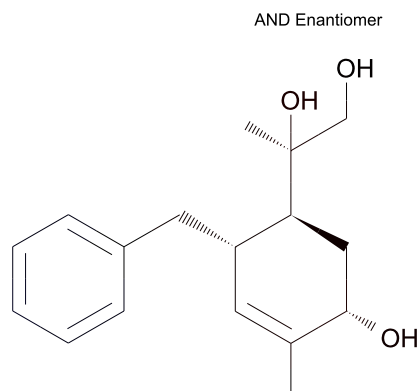C<sub>17</sub>H<sub>24</sub>O<sub>3</sub>

Molecular Weight: 276.371

ALogP: 2.165

Rotatable Bonds: 4

Acceptors: 3

Donors: 3

## Model Prediction

Prediction: Toxic

Probability: 0.573

Enrichment: 1.09

Bayesian Score: 0.671

Mahalanobis Distance: 11.3

Mahalanobis Distance p-value: 0.00035

Prediction: Positive if the Bayesian score is above the estimated best cutoff value from minimizing the false positive and false negative rate.

Probability: The estimated probability that the sample is in the positive category. This assumes that the Bayesian score follows a normal distribution and is different from the prediction using a cutoff.

Enrichment: An estimate of enrichment, that is, the increased likelihood (versus random) of this sample being in the category.

Bayesian Score: The standard Laplacian-modified Bayesian score.

Mahalanobis Distance: The Mahalanobis distance (MD) is the distance to the center of the training data. The larger the MD, the less trustworthy the prediction.

Mahalanobis Distance p-value: The p-value gives the fraction of training data with an MD greater than or equal to the one for the given sample, assuming normally distributed data. The smaller the p-value, the less trustworthy the prediction. For highly non-normal X properties (e.g., fingerprints), the MD p-value is wildly inaccurate.

## Structural Similar Compounds

| Name               | Clenbuterol                           | Ambroxol                              | Procarbazine .HCl (Free base form) |
|--------------------|---------------------------------------|---------------------------------------|------------------------------------|
| Structure          |                                       |                                       |                                    |
| Actual Endpoint    | Toxic                                 | Toxic                                 | Toxic                              |
| Predicted Endpoint | Toxic                                 | Toxic                                 | Toxic                              |
| Distance           | 0.468                                 | 0.608                                 | 0.610                              |
| Reference          | Iyakuin Kenkyu<br>15(4):597-613; 1984 | Iyakuin Kenkyu<br>12(1):371-387; 1981 | Teratology 2(1):23-31;<br>1969     |

## Model Applicability

Unknown features are fingerprint features in the query molecule, but not found or appearing too infrequently in the training set.

1. OPS PC9 out of range. Value: -4.1153. Training min, max, SD, explained variance: -3.9182, 4.9981, 1.45, 0.0308.

## Feature Contribution

### Top features for positive contribution

| Fingerprint | Bit/Smiles | Feature Structure                                      | Score | Toxic in training set |
|-------------|------------|--------------------------------------------------------|-------|-----------------------|
| SCFP_6      | 1702664599 | <p>AND Enantiomer</p> <p>[*]C([*])C@@H(O)C(=O)N[*]</p> | 0.322 | 4 out of 5            |

|                                        |             |                                                                                                                                                      |        |                       |
|----------------------------------------|-------------|------------------------------------------------------------------------------------------------------------------------------------------------------|--------|-----------------------|
| SCFP_6                                 | -424515134  | <p>AND Enantiomer</p> 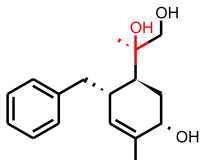 <p>[*]C([*])O</p>                          | 0.275  | 39 out of 56          |
| SCFP_6                                 | 1416196903  | <p>AND Enantiomer</p>  <p>[*]OC(C)(C)C([*])[*]</p>                | 0.255  | 3 out of 4            |
| Top Features for negative contribution |             |                                                                                                                                                      |        |                       |
| Fingerprint                            | Bit/Smiles  | Feature Structure                                                                                                                                    | Score  | Toxic in training set |
| SCFP_6                                 | -1379591900 | <p>AND Enantiomer</p>  <p>[*][c]1:[*]:[cH]:[cH]:[cH]:[cH]:1</p>   | -0.282 | 33 out of 84          |
| SCFP_6                                 | 1653911926  | <p>AND Enantiomer</p>  <p>[*][c]1:[cH]:[cH]:[cH]:[cH]:[cH]:1</p> | -0.188 | 12 out of 28          |
| SCFP_6                                 | -1043339860 | <p>AND Enantiomer</p>  <p>[*]C([*])C1C[*][*]C1</p>              | -0.114 | 13 out of 28          |

# Simeprevir

# TOPKAT\_Developmental\_Toxicity\_Potential

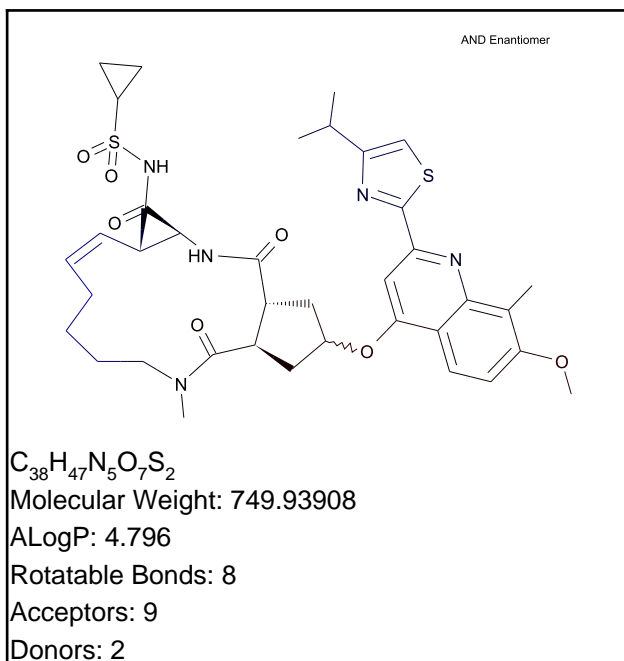

## Model Prediction

Prediction: Non-Toxic

Probability: 0.438

Enrichment: 0.833

Bayesian Score: -3.14

Mahalanobis Distance: 13.4

Mahalanobis Distance p-value: 9.2e-008

Prediction: Positive if the Bayesian score is above the estimated best cutoff value from minimizing the false positive and false negative rate.

Probability: The estimated probability that the sample is in the positive category. This assumes that the Bayesian score follows a normal distribution and is different from the prediction using a cutoff.

Enrichment: An estimate of enrichment, that is, the increased likelihood (versus random) of this sample being in the category. Bayesian Score: The standard Laplacian-modified Bayesian score.

Mahalanobis Distance: The Mahalanobis distance (MD) is the distance to the center of the training data. The larger the MD, the less trustworthy the prediction.

Mahalanobis Distance p-value: The p-value gives the fraction of training data with an MD greater than or equal to the one for the given sample, assuming normally distributed data. The smaller the p-value, the less trustworthy the prediction. For highly non-normal X properties (e.g., fingerprints), the MD p-value is wildly inaccurate.

## Structural Similar Compounds

| Name               | Reserpate                                                                           | Bromocriptine                                                                       | Estramustine Phosphate Disodium (Free acid form)                                    |
|--------------------|-------------------------------------------------------------------------------------|-------------------------------------------------------------------------------------|-------------------------------------------------------------------------------------|
| Structure          | 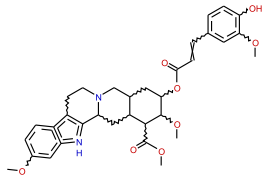 |  |  |
| Actual Endpoint    | Toxic                                                                               | Non-Toxic                                                                           | Non-Toxic                                                                           |
| Predicted Endpoint | Toxic                                                                               | Non-Toxic                                                                           | Non-Toxic                                                                           |
| Distance           | 0.675                                                                               | 0.778                                                                               | 0.819                                                                               |
| Reference          | Oyo Yakuri 18:105-124; 1979                                                         | Toxicol Lett 50:189-194; 1990                                                       | Oyo Yakuri 20(6):1219-1236; 1980                                                    |

## Model Applicability

Unknown features are fingerprint features in the query molecule, but not found or appearing too infrequently in the training set.

- OPS PC12 out of range. Value: 3.5244. Training min, max, SD, explained variance: -3.7514, 3.3159, 1.318, 0.0255.

## Feature Contribution

| Top features for positive contribution |            |                                                                                                                                     |       |                       |
|----------------------------------------|------------|-------------------------------------------------------------------------------------------------------------------------------------|-------|-----------------------|
| Fingerprint                            | Bit/Smiles | Feature Structure                                                                                                                   | Score | Toxic in training set |
| SCFP_6                                 | 591469355  | 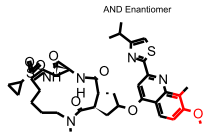<br><chem>[*][c](:[*]):[c](OC):[cH]:[*]</chem> | 0.411 | 10 out of 12          |

|                                        |             |                                                                                                                                                           |        |                       |
|----------------------------------------|-------------|-----------------------------------------------------------------------------------------------------------------------------------------------------------|--------|-----------------------|
| SCFP_6                                 | -395254381  | <p>AND Enantiomer</p> 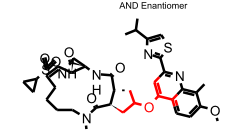 <p>[*]:[cH]:[c](OC1C[*][*]C1):[c](:[*]):[*]</p> | 0.271  | 1 out of 1            |
| SCFP_6                                 | -109092631  | <p>AND Enantiomer</p>  <p>[*]CCN(C)C(=O)C([*])[*]</p>                  | 0.271  | 1 out of 1            |
| Top Features for negative contribution |             |                                                                                                                                                           |        |                       |
| Fingerprint                            | Bit/Smiles  | Feature Structure                                                                                                                                         | Score  | Toxic in training set |
| SCFP_6                                 | -98332825   | <p>AND Enantiomer</p>  <p>[*]CCCCC=[*]</p>                             | -0.718 | 0 out of 2            |
| SCFP_6                                 | -1476112164 | <p>AND Enantiomer</p>  <p>[*]CC\C=C/C1[*][*]1</p>                    | -0.718 | 0 out of 2            |
| SCFP_6                                 | 1260369147  | <p>AND Enantiomer</p>  <p>[*]CCC\C=C/[*]</p>                         | -0.718 | 0 out of 2            |

AND Enantiomer

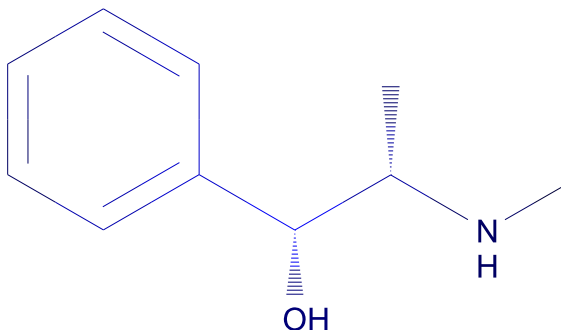C<sub>10</sub>H<sub>15</sub>NO

Molecular Weight: 165.232

ALogP: 1.234

Rotatable Bonds: 3

Acceptors: 2

Donors: 2

## Model Prediction

Prediction: Non-Carcinogen

Probability: 0.207

Enrichment: 0.647

Bayesian Score: -4.88

Mahalanobis Distance: 9.32

Mahalanobis Distance p-value: 0.749

Prediction: Positive if the Bayesian score is above the estimated best cutoff value from minimizing the false positive and false negative rate.

Probability: The estimated probability that the sample is in the positive category. This assumes that the Bayesian score follows a normal distribution and is different from the prediction using a cutoff.

Enrichment: An estimate of enrichment, that is, the increased likelihood (versus random) of this sample being in the category.

Bayesian Score: The standard Laplacian-modified Bayesian score.

Mahalanobis Distance: The Mahalanobis distance (MD) is the distance to the center of the training data. The larger the MD, the less trustworthy the prediction.

Mahalanobis Distance p-value: The p-value gives the fraction of training data with an MD greater than or equal to the one for the given sample, assuming normally distributed data. The smaller the p-value, the less trustworthy the prediction. For highly non-normal X properties (e.g., fingerprints), the MD p-value is wildly inaccurate.

## Structural Similar Compounds

| Name               | Ephedrine                                                           | Phenelzine                                                          | Tocainide                                                           |
|--------------------|---------------------------------------------------------------------|---------------------------------------------------------------------|---------------------------------------------------------------------|
| Structure          |                                                                     |                                                                     |                                                                     |
| Actual Endpoint    | Non-Carcinogen                                                      | Carcinogen                                                          | Non-Carcinogen                                                      |
| Predicted Endpoint | Non-Carcinogen                                                      | Carcinogen                                                          | Non-Carcinogen                                                      |
| Distance           | 0.000                                                               | 0.523                                                               | 0.550                                                               |
| Reference          | US FDA (Centre for Drug Eval.& Res./Off. Testing & Res.) Sept. 1997 | US FDA (Centre for Drug Eval.& Res./Off. Testing & Res.) Sept. 1997 | US FDA (Centre for Drug Eval.& Res./Off. Testing & Res.) Sept. 1997 |

## Model Applicability

Unknown features are fingerprint features in the query molecule, but not found or appearing too infrequently in the training set.

1. All properties and OPS components are within expected ranges.

## Feature Contribution

### Top features for positive contribution

| Fingerprint | Bit/Smiles | Feature Structure | Score | Carcinogen in training set |
|-------------|------------|-------------------|-------|----------------------------|
| ECFP_6      | 864287155  | <p>[*]NC</p>      | 0.2   | 4 out of 10                |

### Top Features for negative contribution

| Fingerprint | Bit/Smiles | Feature Structure | Score | Carcinogen in training set |
|-------------|------------|-------------------|-------|----------------------------|
|             |            |                   |       |                            |

|        |             |                                                                                                                                                                        |        |              |
|--------|-------------|------------------------------------------------------------------------------------------------------------------------------------------------------------------------|--------|--------------|
| ECFP_6 | -388186450  | <p>AND Enantiomer</p> 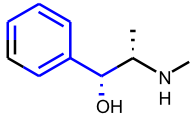 <p><chem>[*]C([*])[c]1:[cH]:[*]:[cH]:[cH]:[cH]:1</chem></p>  | -0.857 | 1 out of 12  |
| ECFP_6 | 2014710090  | <p>AND Enantiomer</p>  <p><chem>[*]C([*])[c]1:[cH]:[cH]:[cH]:[cH]:[cH]:1</chem></p> | -0.716 | 1 out of 10  |
| ECFP_6 | -1910270391 | <p>AND Enantiomer</p>  <p><chem>[*]C([*])[*]</chem></p>                             | -0.307 | 20 out of 89 |



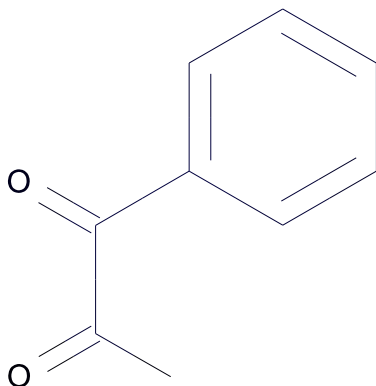C<sub>9</sub>H<sub>8</sub>O<sub>2</sub>

Molecular Weight: 148.159

ALogP: 1.446

Rotatable Bonds: 2

Acceptors: 2

Donors: 0

## Model Prediction

Prediction: Non-Carcinogen

Probability: 0.237

Enrichment: 0.739

Bayesian Score: -1.53

Mahalanobis Distance: 11.1

Mahalanobis Distance p-value: 0.0935

Prediction: Positive if the Bayesian score is above the estimated best cutoff value from minimizing the false positive and false negative rate.

Probability: The estimated probability that the sample is in the positive category. This assumes that the Bayesian score follows a normal distribution and is different from the prediction using a cutoff.

Enrichment: An estimate of enrichment, that is, the increased likelihood (versus random) of this sample being in the category.

Bayesian Score: The standard Laplacian-modified Bayesian score.

Mahalanobis Distance: The Mahalanobis distance (MD) is the distance to the center of the training data. The larger the MD, the less trustworthy the prediction.

Mahalanobis Distance p-value: The p-value gives the fraction of training data with an MD greater than or equal to the one for the given sample, assuming normally distributed data. The smaller the p-value, the less trustworthy the prediction. For highly non-normal X properties (e.g., fingerprints), the MD p-value is wildly inaccurate.

## Structural Similar Compounds

| Name               | Coumarin                                                            | Amphetamine                                                         | Phenacetin                                                          |
|--------------------|---------------------------------------------------------------------|---------------------------------------------------------------------|---------------------------------------------------------------------|
| Structure          |                                                                     |                                                                     |                                                                     |
| Actual Endpoint    | Carcinogen                                                          | Non-Carcinogen                                                      | Carcinogen                                                          |
| Predicted Endpoint | Carcinogen                                                          | Non-Carcinogen                                                      | Carcinogen                                                          |
| Distance           | 0.570                                                               | 0.576                                                               | 0.580                                                               |
| Reference          | US FDA (Centre for Drug Eval.& Res./Off. Testing & Res.) Sept. 1997 | US FDA (Centre for Drug Eval.& Res./Off. Testing & Res.) Sept. 1997 | US FDA (Centre for Drug Eval.& Res./Off. Testing & Res.) Sept. 1997 |

## Model Applicability

Unknown features are fingerprint features in the query molecule, but not found or appearing too infrequently in the training set.

1. All properties and OPS components are within expected ranges.
2. Unknown ECFP\_2 feature: -472613004: [\*]C(=[\*])C(=O)C

## Feature Contribution

### Top features for positive contribution

| Fingerprint | Bit/Smiles | Feature Structure                     | Score | Carcinogen in training set |
|-------------|------------|---------------------------------------|-------|----------------------------|
| ECFP_6      | -175146122 | <br>[*]C(=[*])[c](:[cH]:[*]):[cH]:[*] | 0.171 | 9 out of 24                |

### Top Features for negative contribution

| Fingerprint | Bit/Smiles | Feature Structure                                                                                                                                 | Score  | Carcinogen in training set |
|-------------|------------|---------------------------------------------------------------------------------------------------------------------------------------------------|--------|----------------------------|
| ECFP_6      | 1451403962 | 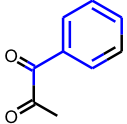<br><chem>[*]C(=[*])[c]1:[cH]:[*]:[cH]:[cH]:[cH]:1</chem>      | -0.459 | 1 out of 7                 |
| ECFP_6      | 169261700  | <br><chem>[*]C(=[*])C(=O)[c]1:[cH]:[cH]:[*]:[cH]:[cH]:1</chem> | -0.27  | 0 out of 1                 |
| ECFP_6      | 1432101658 | <br><chem>[*]C(=[*])C(=O)[c]1:[cH]:[cH]:[cH]:1</chem>          | -0.27  | 0 out of 1                 |

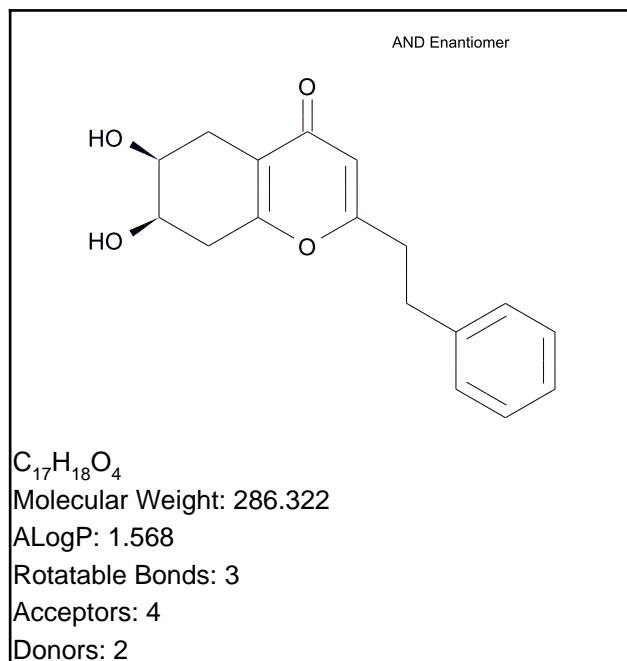

### Model Prediction

Prediction: Carcinogen

Probability: 0.26

Enrichment: 0.811

Bayesian Score: -0.148

Mahalanobis Distance: 10.4

Mahalanobis Distance p-value: 0.282

Prediction: Positive if the Bayesian score is above the estimated best cutoff value from minimizing the false positive and false negative rate.

Probability: The estimated probability that the sample is in the positive category. This assumes that the Bayesian score follows a normal distribution and is different from the prediction using a cutoff.

Enrichment: An estimate of enrichment, that is, the increased likelihood (versus random) of this sample being in the category.

Bayesian Score: The standard Laplacian-modified Bayesian score.

Mahalanobis Distance: The Mahalanobis distance (MD) is the distance to the center of the training data. The larger the MD, the less trustworthy the prediction.

Mahalanobis Distance p-value: The p-value gives the fraction of training data with an MD greater than or equal to the one for the given sample, assuming normally distributed data. The smaller the p-value, the less trustworthy the prediction. For highly non-normal X properties (e.g., fingerprints), the MD p-value is wildly inaccurate.

### Structural Similar Compounds

| Name               | Tolazamide                                                                          | Naltrexone                                                                          | Phenobarbital                                                                       |
|--------------------|-------------------------------------------------------------------------------------|-------------------------------------------------------------------------------------|-------------------------------------------------------------------------------------|
| Structure          | 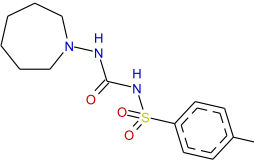 |  |  |
| Actual Endpoint    | Non-Carcinogen                                                                      | Non-Carcinogen                                                                      | Carcinogen                                                                          |
| Predicted Endpoint | Non-Carcinogen                                                                      | Non-Carcinogen                                                                      | Carcinogen                                                                          |
| Distance           | 0.557                                                                               | 0.593                                                                               | 0.614                                                                               |
| Reference          | US FDA (Centre for Drug Eval.& Res./Off. Testing & Res.) Sept. 1997                 | US FDA (Centre for Drug Eval.& Res./Off. Testing & Res.) Sept. 1997                 | US FDA (Centre for Drug Eval.& Res./Off. Testing & Res.) Sept. 1997                 |

### Model Applicability

Unknown features are fingerprint features in the query molecule, but not found or appearing too infrequently in the training set.

1. All properties and OPS components are within expected ranges.
2. Unknown ECFP\_2 feature: 1794461805: [\*]CC(=C([\*])[\*])C(=[\*])[\*])
3. Unknown ECFP\_2 feature: 1650944136: [\*]CC(=C([\*])[\*])O[\*]

### Feature Contribution

#### Top features for positive contribution

| Fingerprint | Bit/Smiles | Feature Structure                                                                                                                                                    | Score | Carcinogen in training set |
|-------------|------------|----------------------------------------------------------------------------------------------------------------------------------------------------------------------|-------|----------------------------|
| ECFP_6      | 464808839  | <p style="text-align: center;">AND Enantiomer</p> 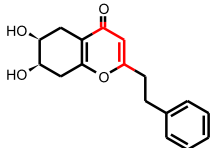 <p>[*]C(=CC(=[*])[*])[*]</p> | 0.524 | 8 out of 14                |

| ECFP_6                                 | 2106656448 | <p>AND Enantiomer</p> 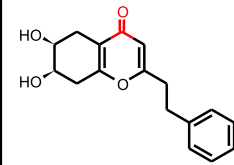 <p>[*]C(=O)[*]</p>                    | 0.254 | 31 out of 77               |
|----------------------------------------|------------|-------------------------------------------------------------------------------------------------------------------------------------------------|-------|----------------------------|
| ECFP_6                                 | -560785749 | <p>AND Enantiomer</p>  <p>[*]C(=[*])OC(=[*])[*]</p>          | 0.212 | 1 out of 2                 |
| Top Features for negative contribution |            |                                                                                                                                                 |       |                            |
| Fingerprint                            | Bit/Smiles | Feature Structure                                                                                                                               | Score | Carcinogen in training set |
| ECFP_6                                 | 571598839  | <p>AND Enantiomer</p>  <p>[*]C1=[*]C[C@@H](O)[C@@H](O)C1</p> | -0.27 | 0 out of 1                 |
| ECFP_6                                 | 1299558496 | <p>AND Enantiomer</p>  <p>[*]C(=[*])C(=O)C=[*]</p>          | -0.27 | 0 out of 1                 |
| ECFP_6                                 | 1875238785 | <p>AND Enantiomer</p>  <p>[*]C\C(=C\[*])\O[*]</p>          | -0.27 | 0 out of 1                 |

AND Enantiomer

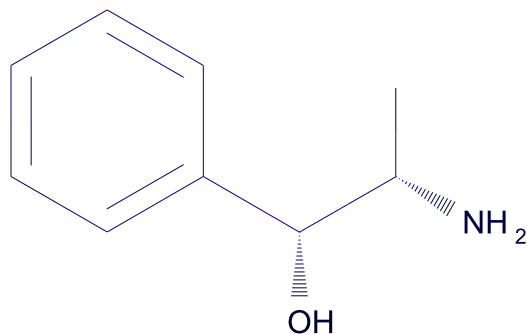C<sub>9</sub>H<sub>13</sub>NO

Molecular Weight: 151.206

ALogP: 0.802

Rotatable Bonds: 2

Acceptors: 2

Donors: 2

**Model Prediction**

Prediction: Non-Carcinogen

Probability: 0.213

Enrichment: 0.665

Bayesian Score: -3.84

Mahalanobis Distance: 9.78

Mahalanobis Distance p-value: 0.547

Prediction: Positive if the Bayesian score is above the estimated best cutoff value from minimizing the false positive and false negative rate.

Probability: The estimated probability that the sample is in the positive category. This assumes that the Bayesian score follows a normal distribution and is different from the prediction using a cutoff.

Enrichment: An estimate of enrichment, that is, the increased likelihood (versus random) of this sample being in the category.

Bayesian Score: The standard Laplacian-modified Bayesian score.

Mahalanobis Distance: The Mahalanobis distance (MD) is the distance to the center of the training data. The larger the MD, the less trustworthy the prediction.

Mahalanobis Distance p-value: The p-value gives the fraction of training data with an MD greater than or equal to the one for the given sample, assuming normally distributed data. The smaller the p-value, the less trustworthy the prediction. For highly non-normal X properties (e.g., fingerprints), the MD p-value is wildly inaccurate.

**Structural Similar Compounds**

| Name               | Ephedrine                                                           | Phenelzine                                                          | Tocainide                                                           |
|--------------------|---------------------------------------------------------------------|---------------------------------------------------------------------|---------------------------------------------------------------------|
| Structure          |                                                                     |                                                                     |                                                                     |
| Actual Endpoint    | Non-Carcinogen                                                      | Carcinogen                                                          | Non-Carcinogen                                                      |
| Predicted Endpoint | Non-Carcinogen                                                      | Carcinogen                                                          | Non-Carcinogen                                                      |
| Distance           | 0.391                                                               | 0.479                                                               | 0.503                                                               |
| Reference          | US FDA (Centre for Drug Eval.& Res./Off. Testing & Res.) Sept. 1997 | US FDA (Centre for Drug Eval.& Res./Off. Testing & Res.) Sept. 1997 | US FDA (Centre for Drug Eval.& Res./Off. Testing & Res.) Sept. 1997 |

**Model Applicability**

Unknown features are fingerprint features in the query molecule, but not found or appearing too infrequently in the training set.

1. All properties and OPS components are within expected ranges.
2. Unknown ECFP\_2 feature: -261056708: [\*]C([\*])[C@H](C)N

**Feature Contribution****Top Features for negative contribution**

| Fingerprint | Bit/Smiles | Feature Structure                       | Score | Carcinogen in training set |
|-------------|------------|-----------------------------------------|-------|----------------------------|
| ECFP_6      | -933808133 | <p>AND Enantiomer</p> <p>[*]C([*])N</p> | -1.33 | 0 out of 9                 |

|        |            |                                                                                                                                                                       |        |             |
|--------|------------|-----------------------------------------------------------------------------------------------------------------------------------------------------------------------|--------|-------------|
| ECFP_6 | -388186450 | <p>AND Enantiomer</p> 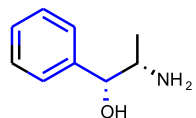 <p><chem>[*]C([*])[c]1:[cH]:[*]:[cH]:[cH]:[cH]:1</chem></p> | -0.857 | 1 out of 12 |
| ECFP_6 | 2014710090 | <p>AND Enantiomer</p>  <p><chem>[*]C([*])[c]1:[cH]:[cH]:[cH]:[cH]:1</chem></p>     | -0.716 | 1 out of 10 |

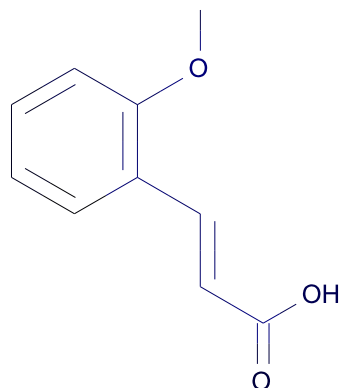C<sub>10</sub>H<sub>10</sub>O<sub>3</sub>

Molecular Weight: 178.185

ALogP: 1.911

Rotatable Bonds: 3

Acceptors: 3

Donors: 1

## Model Prediction

Prediction: Non-Carcinogen

Probability: 0.205

Enrichment: 0.641

Bayesian Score: -5.59

Mahalanobis Distance: 8.3

Mahalanobis Distance p-value: 0.976

Prediction: Positive if the Bayesian score is above the estimated best cutoff value from minimizing the false positive and false negative rate.

Probability: The estimated probability that the sample is in the positive category. This assumes that the Bayesian score follows a normal distribution and is different from the prediction using a cutoff.

Enrichment: An estimate of enrichment, that is, the increased likelihood (versus random) of this sample being in the category.

Bayesian Score: The standard Laplacian-modified Bayesian score.

Mahalanobis Distance: The Mahalanobis distance (MD) is the distance to the center of the training data. The larger the MD, the less trustworthy the prediction.

Mahalanobis Distance p-value: The p-value gives the fraction of training data with an MD greater than or equal to the one for the given sample, assuming normally distributed data. The smaller the p-value, the less trustworthy the prediction. For highly non-normal X properties (e.g., fingerprints), the MD p-value is wildly inaccurate.

## Structural Similar Compounds

| Name               | Aspirin                                                             | Phenacetin                                                          | Eugenol                                                             |
|--------------------|---------------------------------------------------------------------|---------------------------------------------------------------------|---------------------------------------------------------------------|
| Structure          |                                                                     |                                                                     |                                                                     |
| Actual Endpoint    | Non-Carcinogen                                                      | Carcinogen                                                          | Non-Carcinogen                                                      |
| Predicted Endpoint | Non-Carcinogen                                                      | Carcinogen                                                          | Non-Carcinogen                                                      |
| Distance           | 0.527                                                               | 0.555                                                               | 0.560                                                               |
| Reference          | US FDA (Centre for Drug Eval.& Res./Off. Testing & Res.) Sept. 1997 | US FDA (Centre for Drug Eval.& Res./Off. Testing & Res.) Sept. 1997 | US FDA (Centre for Drug Eval.& Res./Off. Testing & Res.) Sept. 1997 |

## Model Applicability

Unknown features are fingerprint features in the query molecule, but not found or appearing too infrequently in the training set.

1. All properties and OPS components are within expected ranges.
2. Unknown ECFP\_2 feature: 1335702447: [\*][c](:[\*]):[c](C=[\*]):c:[\*]

## Feature Contribution

### Top features for positive contribution

| Fingerprint | Bit/Smiles  | Feature Structure | Score | Carcinogen in training set |
|-------------|-------------|-------------------|-------|----------------------------|
| ECFP_6      | -1925046727 |                   | 0.391 | 11 out of 23               |

### Top Features for negative contribution

| Fingerprint | Bit/Smiles  | Feature Structure                                                                                                         | Score  | Carcinogen in training set |
|-------------|-------------|---------------------------------------------------------------------------------------------------------------------------|--------|----------------------------|
| ECFP_6      | -1831055759 | 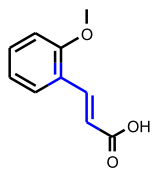<br><chem>[*]C=C\c([*]):[*]:[*]</chem> | -0.805 | 0 out of 4                 |
| ECFP_6      | -470416293  | <br><chem>[*]C=C\C(=[*])[*]</chem>     | -0.657 | 0 out of 3                 |
| ECFP_6      | 1307307440  | <br><chem>[*]:[c](:[*])OC</chem>       | -0.558 | 4 out of 25                |



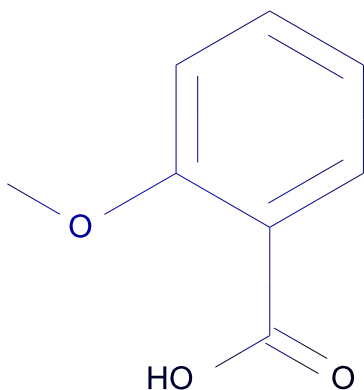C<sub>8</sub>H<sub>8</sub>O<sub>3</sub>

Molecular Weight: 152.147

ALogP: 1.443

Rotatable Bonds: 2

Acceptors: 3

Donors: 1

## Model Prediction

Prediction: Non-Carcinogen

Probability: 0.207

Enrichment: 0.647

Bayesian Score: -4.95

Mahalanobis Distance: 7.82

Mahalanobis Distance p-value: 0.996

Prediction: Positive if the Bayesian score is above the estimated best cutoff value from minimizing the false positive and false negative rate.

Probability: The estimated probability that the sample is in the positive category. This assumes that the Bayesian score follows a normal distribution and is different from the prediction using a cutoff.

Enrichment: An estimate of enrichment, that is, the increased likelihood (versus random) of this sample being in the category.

Bayesian Score: The standard Laplacian-modified Bayesian score.

Mahalanobis Distance: The Mahalanobis distance (MD) is the distance to the center of the training data. The larger the MD, the less trustworthy the prediction.

Mahalanobis Distance p-value: The p-value gives the fraction of training data with an MD greater than or equal to the one for the given sample, assuming normally distributed data. The smaller the p-value, the less trustworthy the prediction. For highly non-normal X properties (e.g., fingerprints), the MD p-value is wildly inaccurate.

## Structural Similar Compounds

| Name               | Aspirin                                                             | Nicotinic acid                                                      | Phenacetin                                                          |
|--------------------|---------------------------------------------------------------------|---------------------------------------------------------------------|---------------------------------------------------------------------|
| Structure          |                                                                     |                                                                     |                                                                     |
| Actual Endpoint    | Non-Carcinogen                                                      | Non-Carcinogen                                                      | Carcinogen                                                          |
| Predicted Endpoint | Non-Carcinogen                                                      | Non-Carcinogen                                                      | Carcinogen                                                          |
| Distance           | 0.348                                                               | 0.569                                                               | 0.592                                                               |
| Reference          | US FDA (Centre for Drug Eval.& Res./Off. Testing & Res.) Sept. 1997 | US FDA (Centre for Drug Eval.& Res./Off. Testing & Res.) Sept. 1997 | US FDA (Centre for Drug Eval.& Res./Off. Testing & Res.) Sept. 1997 |

## Model Applicability

Unknown features are fingerprint features in the query molecule, but not found or appearing too infrequently in the training set.

1. All properties and OPS components are within expected ranges.

## Feature Contribution

### Top features for positive contribution

| Fingerprint | Bit/Smiles | Feature Structure                      | Score | Carcinogen in training set |
|-------------|------------|----------------------------------------|-------|----------------------------|
| ECFP_6      | 989674687  | <br>[*][c](:[*]):[c](:[cH] :[*])C(=O)O | 0.164 | 2 out of 5                 |

### Top Features for negative contribution

| Fingerprint | Bit/Smiles | Feature Structure | Score | Carcinogen in training set |
|-------------|------------|-------------------|-------|----------------------------|
|             |            |                   |       |                            |

|        |            |                                                                                                                                                 |        |             |
|--------|------------|-------------------------------------------------------------------------------------------------------------------------------------------------|--------|-------------|
| ECFP_6 | 1307307440 | 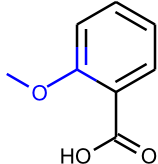<br><chem>[*]:[c](:[*])OC</chem>                             | -0.558 | 4 out of 25 |
| ECFP_6 | 2025485523 | <br><chem>[*]C(=[*])O</chem>                                 | -0.506 | 8 out of 45 |
| ECFP_6 | 1635415905 | <br><chem>[*]C(=[*])[c]1:[cH]:[cH]:[cH]:[cH]:[c]:1[*]</chem> | -0.482 | 0 out of 2  |

AND Enantiomer

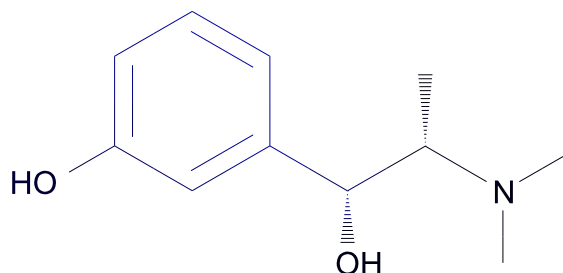C<sub>11</sub>H<sub>17</sub>NO<sub>2</sub>

Molecular Weight: 195.258

ALogP: 1.528

Rotatable Bonds: 3

Acceptors: 3

Donors: 2

## Model Prediction

Prediction: Non-Carcinogen

Probability: 0.208

Enrichment: 0.65

Bayesian Score: -4.66

Mahalanobis Distance: 12

Mahalanobis Distance p-value: 0.0119

Prediction: Positive if the Bayesian score is above the estimated best cutoff value from minimizing the false positive and false negative rate.

Probability: The estimated probability that the sample is in the positive category. This assumes that the Bayesian score follows a normal distribution and is different from the prediction using a cutoff.

Enrichment: An estimate of enrichment, that is, the increased likelihood (versus random) of this sample being in the category.

Bayesian Score: The standard Laplacian-modified Bayesian score.

Mahalanobis Distance: The Mahalanobis distance (MD) is the distance to the center of the training data. The larger the MD, the less trustworthy the prediction.

Mahalanobis Distance p-value: The p-value gives the fraction of training data with an MD greater than or equal to the one for the given sample, assuming normally distributed data. The smaller the p-value, the less trustworthy the prediction. For highly non-normal X properties (e.g., fingerprints), the MD p-value is wildly inaccurate.

## Structural Similar Compounds

| Name               | Ephedrine                                                           | Phenylephrine                                                       | Tocainide                                                           |
|--------------------|---------------------------------------------------------------------|---------------------------------------------------------------------|---------------------------------------------------------------------|
| Structure          |                                                                     |                                                                     |                                                                     |
| Actual Endpoint    | Non-Carcinogen                                                      | Non-Carcinogen                                                      | Non-Carcinogen                                                      |
| Predicted Endpoint | Non-Carcinogen                                                      | Non-Carcinogen                                                      | Non-Carcinogen                                                      |
| Distance           | 0.486                                                               | 0.513                                                               | 0.557                                                               |
| Reference          | US FDA (Centre for Drug Eval.& Res./Off. Testing & Res.) Sept. 1997 | US FDA (Centre for Drug Eval.& Res./Off. Testing & Res.) Sept. 1997 | US FDA (Centre for Drug Eval.& Res./Off. Testing & Res.) Sept. 1997 |

## Model Applicability

Unknown features are fingerprint features in the query molecule, but not found or appearing too infrequently in the training set.

1. All properties and OPS components are within expected ranges.
2. Unknown ECFP\_2 feature: -1280034494: [\*]C([\*])[C@H](C)N([\*])[\*]

## Feature Contribution

### Top features for positive contribution

| Fingerprint | Bit/Smiles | Feature Structure                | Score | Carcinogen in training set |
|-------------|------------|----------------------------------|-------|----------------------------|
| ECFP_6      | -177786161 | <br>[*]:[cH]:[c](O):[cH]:<br>[*] | 0.406 | 7 out of 14                |

### Top Features for negative contribution

| Fingerprint | Bit/Smiles | Feature Structure                                                                                                                                        | Score  | Carcinogen in training set |
|-------------|------------|----------------------------------------------------------------------------------------------------------------------------------------------------------|--------|----------------------------|
| ECFP_6      | -388186450 | <p>AND Enantiomer</p> 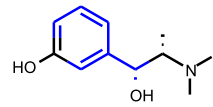 <p>[*]C([*])[c]1:[cH]:[*]:[cH]:[cH]:[cH]:1</p> | -0.857 | 1 out of 12                |
| ECFP_6      | -783815036 | <p>AND Enantiomer</p>  <p>O[c]1:[cH]:[*]:[cH]:[cH]:[cH]:1</p>         | -0.657 | 0 out of 3                 |
| ECFP_6      | 2007300961 | <p>AND Enantiomer</p>  <p>[*][c]1:[*]:[c]([*]):[cH]:[cH]:[cH]:1</p>   | -0.652 | 5 out of 34                |

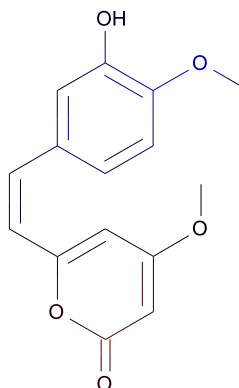C<sub>15</sub>H<sub>14</sub>O<sub>5</sub>

Molecular Weight: 274.269

ALogP: 1.969

Rotatable Bonds: 4

Acceptors: 5

Donors: 1

## Model Prediction

Prediction: Non-Carcinogen

Probability: 0.219

Enrichment: 0.683

Bayesian Score: -3.08

Mahalanobis Distance: 10

Mahalanobis Distance p-value: 0.435

Prediction: Positive if the Bayesian score is above the estimated best cutoff value from minimizing the false positive and false negative rate.

Probability: The estimated probability that the sample is in the positive category. This assumes that the Bayesian score follows a normal distribution and is different from the prediction using a cutoff.

Enrichment: An estimate of enrichment, that is, the increased likelihood (versus random) of this sample being in the category.

Bayesian Score: The standard Laplacian-modified Bayesian score.

Mahalanobis Distance: The Mahalanobis distance (MD) is the distance to the center of the training data. The larger the MD, the less trustworthy the prediction.

Mahalanobis Distance p-value: The p-value gives the fraction of training data with an MD greater than or equal to the one for the given sample, assuming normally distributed data. The smaller the p-value, the less trustworthy the prediction. For highly non-normal X properties (e.g., fingerprints), the MD p-value is wildly inaccurate.

## Structural Similar Compounds

| Name               | Cytembena                                                           | Scopolamine                                                         | Fluconazole                                                         |
|--------------------|---------------------------------------------------------------------|---------------------------------------------------------------------|---------------------------------------------------------------------|
| Structure          |                                                                     |                                                                     |                                                                     |
| Actual Endpoint    | Non-Carcinogen                                                      | Non-Carcinogen                                                      | Non-Carcinogen                                                      |
| Predicted Endpoint | Non-Carcinogen                                                      | Non-Carcinogen                                                      | Non-Carcinogen                                                      |
| Distance           | 0.535                                                               | 0.593                                                               | 0.619                                                               |
| Reference          | US FDA (Centre for Drug Eval.& Res./Off. Testing & Res.) Sept. 1997 | US FDA (Centre for Drug Eval.& Res./Off. Testing & Res.) Sept. 1997 | US FDA (Centre for Drug Eval.& Res./Off. Testing & Res.) Sept. 1997 |

## Model Applicability

Unknown features are fingerprint features in the query molecule, but not found or appearing too infrequently in the training set.

1. OPS PC13 out of range. Value: 5.2896. Training min, max, SD, explained variance: -3.9176, 5.0348, 1.522, 0.0236.
2. Unknown ECFP\_2 feature: -176483725: [\*]=C[c](:c[\*]):c[\*]
3. Unknown ECFP\_2 feature: -1053980253: [\*]O\C(=C[\*])\C=[\*]
4. Unknown ECFP\_2 feature: -444332269: [\*]O\C(=C[\*])\C=[\*]

## Feature Contribution

| Top features for positive contribution |            |                                        |       |                            |
|----------------------------------------|------------|----------------------------------------|-------|----------------------------|
| Fingerprint                            | Bit/Smiles | Feature Structure                      | Score | Carcinogen in training set |
| ECFP_6                                 | 464808839  | <br><chem>[*]C(=CC(=O)O)C(=O)OC</chem> | 0.524 | 8 out of 14                |

| ECFP_6                                 | -1885846789 | 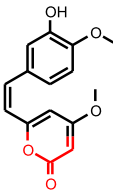<br><chem>[*]OC(=O)C=[*]</chem>                       | 0.424  | 1 out of 1                 |
|----------------------------------------|-------------|------------------------------------------------------------------------------------------------------------------------------------------|--------|----------------------------|
| ECFP_6                                 | -1925046727 | <br><chem>[*]C=[*]</chem>                             | 0.391  | 11 out of 23               |
| Top Features for negative contribution |             |                                                                                                                                          |        |                            |
| Fingerprint                            | Bit/Smiles  | Feature Structure                                                                                                                        | Score  | Carcinogen in training set |
| ECFP_6                                 | 2077607946  | <br><chem>[*]O[c]1:[cH]:[cH]:[c]([*]):[c]:1[*]</chem> | -1.15  | 0 out of 7                 |
| ECFP_6                                 | -1831055759 | <br><chem>[*]C=C[c]([*]):[c]:[c]:1[*]</chem>         | -0.805 | 0 out of 4                 |
| ECFP_6                                 | 1307307440  | <br><chem>[*]:[c]([*])OC</chem>                     | -0.558 | 4 out of 25                |

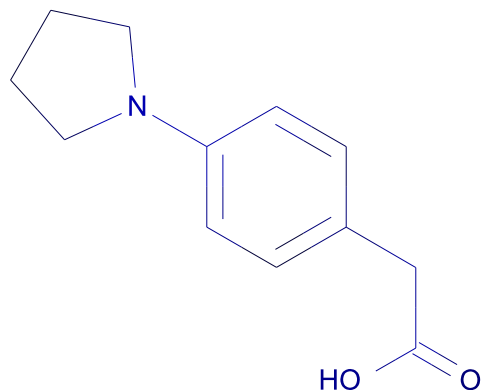

$C_{12}H_{15}NO_2$

Molecular Weight: 205.253

ALogP: 2.117

Rotatable Bonds: 3

Acceptors: 3

Donors: 1

## Model Prediction

Prediction: Non-Carcinogen

Probability: 0.207

Enrichment: 0.645

Bayesian Score: -7.56

Mahalanobis Distance: 10.3

Mahalanobis Distance p-value: 0.304

Prediction: Positive if the Bayesian score is above the estimated best cutoff value from minimizing the false positive and false negative rate.

Probability: The estimated probability that the sample is in the positive category. This assumes that the Bayesian score follows a normal distribution and is different from the prediction using a cutoff.

Enrichment: An estimate of enrichment, that is, the increased likelihood (versus random) of this sample being in the category.

Bayesian Score: The standard Laplacian-modified Bayesian score.

Mahalanobis Distance: The Mahalanobis distance (MD) is the distance to the center of the training data. The larger the MD, the less trustworthy the prediction.

Mahalanobis Distance p-value: The p-value gives the fraction of training data with an MD greater than or equal to the one for the given sample, assuming normally distributed data. The smaller the p-value, the less trustworthy the prediction. For highly non-normal X properties (e.g., fingerprints), the MD p-value is wildly inaccurate.

## Structural Similar Compounds

| Name               | Methylphenidate                                                     | Phenacetin                                                          | Tolmetin                                                            |
|--------------------|---------------------------------------------------------------------|---------------------------------------------------------------------|---------------------------------------------------------------------|
| Structure          |                                                                     |                                                                     |                                                                     |
| Actual Endpoint    | Carcinogen                                                          | Carcinogen                                                          | Non-Carcinogen                                                      |
| Predicted Endpoint | Carcinogen                                                          | Carcinogen                                                          | Non-Carcinogen                                                      |
| Distance           | 0.535                                                               | 0.564                                                               | 0.566                                                               |
| Reference          | US FDA (Centre for Drug Eval.& Res./Off. Testing & Res.) Sept. 1997 | US FDA (Centre for Drug Eval.& Res./Off. Testing & Res.) Sept. 1997 | US FDA (Centre for Drug Eval.& Res./Off. Testing & Res.) Sept. 1997 |

## Model Applicability

Unknown features are fingerprint features in the query molecule, but not found or appearing too infrequently in the training set.

1. All properties and OPS components are within expected ranges.

## Feature Contribution

### Top features for positive contribution

| Fingerprint | Bit/Smiles | Feature Structure                     | Score | Carcinogen in training set |
|-------------|------------|---------------------------------------|-------|----------------------------|
| ECFP_6      | 341335091  | <br><chem>[*]:[c](:[*])N1CCCC1</chem> | 0.212 | 1 out of 2                 |

| ECFP_6                                 | 1737023319 | 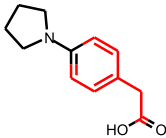<br><chem>[*]C(=[*])C[c]1:[cH]:[cH]:[*]:[cH]:[cH]:1</chem> | 0.212  | 1 out of 2                 |
|----------------------------------------|------------|-----------------------------------------------------------------------------------------------------------------------------------------------|--------|----------------------------|
| ECFP_6                                 | -992506539 | <br><chem>[*]C[*]</chem>                                   | 0.073  | 44 out of 132              |
| Top Features for negative contribution |            |                                                                                                                                               |        |                            |
| Fingerprint                            | Bit/Smiles | Feature Structure                                                                                                                             | Score  | Carcinogen in training set |
| ECFP_6                                 | 1731135544 | <br><chem>[*]CC(=O)O</chem>                                | -1.55  | 0 out of 12                |
| ECFP_6                                 | -175021654 | <br><chem>[*]N([*])[c](:[cH]:[*])[cH]:[*]</chem>          | -0.805 | 0 out of 4                 |
| ECFP_6                                 | -98352723  | <br><chem>[*]:[cH]:[c](:[cH]:[*])N1CCCC1</chem>          | -0.657 | 0 out of 3                 |



AND Enantiomer

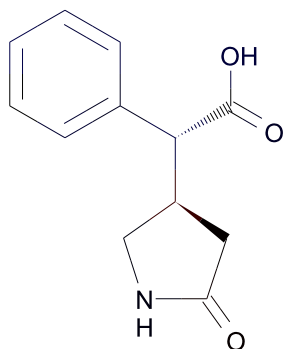C<sub>12</sub>H<sub>13</sub>NO<sub>3</sub>

Molecular Weight: 219.237

ALogP: 0.621

Rotatable Bonds: 3

Acceptors: 3

Donors: 2

## Model Prediction

Prediction: Non-Carcinogen

Probability: 0.228

Enrichment: 0.71

Bayesian Score: -2.25

Mahalanobis Distance: 10.5

Mahalanobis Distance p-value: 0.255

Prediction: Positive if the Bayesian score is above the estimated best cutoff value from minimizing the false positive and false negative rate.

Probability: The estimated probability that the sample is in the positive category. This assumes that the Bayesian score follows a normal distribution and is different from the prediction using a cutoff.

Enrichment: An estimate of enrichment, that is, the increased likelihood (versus random) of this sample being in the category.

Bayesian Score: The standard Laplacian-modified Bayesian score.

Mahalanobis Distance: The Mahalanobis distance (MD) is the distance to the center of the training data. The larger the MD, the less trustworthy the prediction.

Mahalanobis Distance p-value: The p-value gives the fraction of training data with an MD greater than or equal to the one for the given sample, assuming normally distributed data. The smaller the p-value, the less trustworthy the prediction. For highly non-normal X properties (e.g., fingerprints), the MD p-value is wildly inaccurate.

## Structural Similar Compounds

| Name               | Phenobarbital                                                       | Carbromal                                                           | Tocainide                                                           |
|--------------------|---------------------------------------------------------------------|---------------------------------------------------------------------|---------------------------------------------------------------------|
| Structure          |                                                                     |                                                                     |                                                                     |
| Actual Endpoint    | Carcinogen                                                          | Non-Carcinogen                                                      | Non-Carcinogen                                                      |
| Predicted Endpoint | Carcinogen                                                          | Non-Carcinogen                                                      | Non-Carcinogen                                                      |
| Distance           | 0.517                                                               | 0.597                                                               | 0.598                                                               |
| Reference          | US FDA (Centre for Drug Eval.& Res./Off. Testing & Res.) Sept. 1997 | US FDA (Centre for Drug Eval.& Res./Off. Testing & Res.) Sept. 1997 | US FDA (Centre for Drug Eval.& Res./Off. Testing & Res.) Sept. 1997 |

## Model Applicability

Unknown features are fingerprint features in the query molecule, but not found or appearing too infrequently in the training set.

1. All properties and OPS components are within expected ranges.
2. Unknown ECFP\_2 feature: -858846751: [\*]C([\*])C1C[\*][\*]C1

## Feature Contribution

### Top features for positive contribution

| Fingerprint | Bit/Smiles | Feature Structure                                              | Score | Carcinogen in training set |
|-------------|------------|----------------------------------------------------------------|-------|----------------------------|
| ECFP_6      | -622605643 | <p>AND Enantiomer</p> <p>[*]C([*])C@@H(C(=O)O)[*]C1CCNC1=O</p> | 0.424 | 1 out of 1                 |

| ECFP_6                                 | 1603312431  | <p>AND Enantiomer</p> 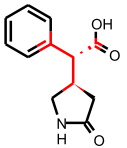 <p>[*]C([*])[C@@H](C(=O)O)[C@H]1CCNC1=O</p>      | 0.424  | 1 out of 1                 |
|----------------------------------------|-------------|------------------------------------------------------------------------------------------------------------------------------------------------------------|--------|----------------------------|
| ECFP_6                                 | -1135409258 | <p>AND Enantiomer</p>  <p>[*]C([*])[C@@H](C(=O)O)[C@H]1CCNC1=O</p>      | 0.424  | 1 out of 1                 |
| Top Features for negative contribution |             |                                                                                                                                                            |        |                            |
| Fingerprint                            | Bit/Smiles  | Feature Structure                                                                                                                                          | Score  | Carcinogen in training set |
| ECFP_6                                 | -388186450  | <p>AND Enantiomer</p>  <p>[*]C([*])[c]1:[cH]:[*]:[cH]:[cH]:[cH]:1</p>   | -0.857 | 1 out of 12                |
| ECFP_6                                 | 2014710090  | <p>AND Enantiomer</p>  <p>[*]C([*])[c]1:[cH]:[cH]:[cH]:[cH]:[cH]:1</p> | -0.716 | 1 out of 10                |
| ECFP_6                                 | -1905455774 | <p>AND Enantiomer</p>  <p>[*]C([*])C(=O)O</p>                         | -0.552 | 1 out of 8                 |

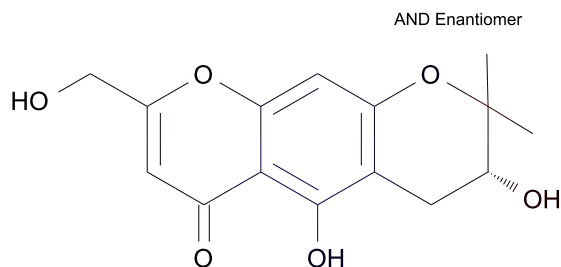

$C_{15}H_{16}O_6$

Molecular Weight: 292.284

ALogP: 0.901

Rotatable Bonds: 1

Acceptors: 6

Donors: 3

## Model Prediction

**Prediction: Carcinogen**

Probability: 0.27

Enrichment: 0.843

Bayesian Score: 0.352

Mahalanobis Distance: 11.7

Mahalanobis Distance p-value: 0.0209

Prediction: Positive if the Bayesian score is above the estimated best cutoff value from minimizing the false positive and false negative rate.

Probability: The estimated probability that the sample is in the positive category. This assumes that the Bayesian score follows a normal distribution and is different from the prediction using a cutoff.

Enrichment: An estimate of enrichment, that is, the increased likelihood (versus random) of this sample being in the category.

Bayesian Score: The standard Laplacian-modified Bayesian score.

Mahalanobis Distance: The Mahalanobis distance (MD) is the distance to the center of the training data. The larger the MD, the less trustworthy the prediction.

Mahalanobis Distance p-value: The p-value gives the fraction of training data with an MD greater than or equal to the one for the given sample, assuming normally distributed data. The smaller the p-value, the less trustworthy the prediction. For highly non-normal X properties (e.g., fingerprints), the MD p-value is wildly inaccurate.

## Structural Similar Compounds

| Name               | Piroxicam                                                           | Triamcinolone                                                       | Sulfamethazine                                                      |
|--------------------|---------------------------------------------------------------------|---------------------------------------------------------------------|---------------------------------------------------------------------|
| Structure          |                                                                     |                                                                     |                                                                     |
| Actual Endpoint    | Non-Carcinogen                                                      | Carcinogen                                                          | Carcinogen                                                          |
| Predicted Endpoint | Non-Carcinogen                                                      | Carcinogen                                                          | Carcinogen                                                          |
| Distance           | 0.664                                                               | 0.677                                                               | 0.685                                                               |
| Reference          | US FDA (Centre for Drug Eval.& Res./Off. Testing & Res.) Sept. 1997 | US FDA (Centre for Drug Eval.& Res./Off. Testing & Res.) Sept. 1997 | US FDA (Centre for Drug Eval.& Res./Off. Testing & Res.) Sept. 1997 |

## Model Applicability

Unknown features are fingerprint features in the query molecule, but not found or appearing too infrequently in the training set.

1. All properties and OPS components are within expected ranges.

## Feature Contribution

### Top features for positive contribution

| Fingerprint | Bit/Smiles | Feature Structure                      | Score | Carcinogen in training set |
|-------------|------------|----------------------------------------|-------|----------------------------|
| ECFP_6      | 464808839  | <br><chem>[*]C(=CC(=[*])[*])[*]</chem> | 0.524 | 8 out of 14                |

|                                        |             |                                                                                                                                                              |        |                            |
|----------------------------------------|-------------|--------------------------------------------------------------------------------------------------------------------------------------------------------------|--------|----------------------------|
| ECFP_6                                 | -200406221  | 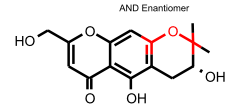<br><chem>[*]C([*])([*])O[c](:[<br/>*]):[*]</chem>                        | 0.451  | 3 out of 5                 |
| ECFP_6                                 | -1051556861 | <br><chem>[*]C[C@@H](O)C([*])([<br/>*])[*]</chem>                         | 0.442  | 2 out of 3                 |
| Top Features for negative contribution |             |                                                                                                                                                              |        |                            |
| Fingerprint                            | Bit/Smiles  | Feature Structure                                                                                                                                            | Score  | Carcinogen in training set |
| ECFP_6                                 | -813997308  | <br><chem>[*]C(=[*])[c](:[c]([*]<br/>)):[*]:[c]([*]):[*]</chem>           | -0.452 | 2 out of 12                |
| ECFP_6                                 | 1778376725  | <br><chem>[*]OC(C)C([*])([*])</chem>                                    | -0.27  | 0 out of 1                 |
| ECFP_6                                 | -1679469954 | <br><chem>[*][C@@H]1[*][c](:[*]<br/>):[c](OC1(C)C):[cH]:<br/>[*]</chem> | -0.27  | 0 out of 1                 |

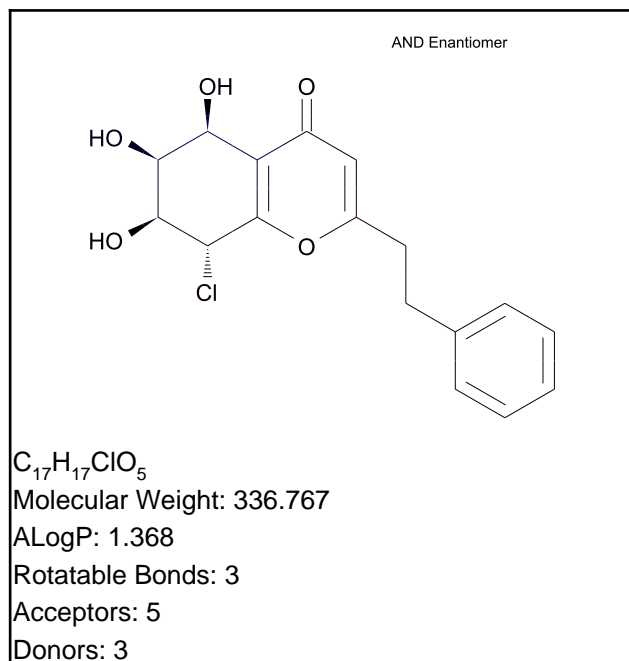

## Model Prediction

Prediction: Non-Carcinogen

Probability: 0.236

Enrichment: 0.735

Bayesian Score: -1.62

Mahalanobis Distance: 13.8

Mahalanobis Distance p-value: 3.11e-005

Prediction: Positive if the Bayesian score is above the estimated best cutoff value from minimizing the false positive and false negative rate.

Probability: The estimated probability that the sample is in the positive category. This assumes that the Bayesian score follows a normal distribution and is different from the prediction using a cutoff.

Enrichment: An estimate of enrichment, that is, the increased likelihood (versus random) of this sample being in the category.

Bayesian Score: The standard Laplacian-modified Bayesian score.

Mahalanobis Distance: The Mahalanobis distance (MD) is the distance to the center of the training data. The larger the MD, the less trustworthy the prediction.

Mahalanobis Distance p-value: The p-value gives the fraction of training data with an MD greater than or equal to the one for the given sample, assuming normally distributed data. The smaller the p-value, the less trustworthy the prediction. For highly non-normal X properties (e.g., fingerprints), the MD p-value is wildly inaccurate.

## Structural Similar Compounds

| Name               | Naltrexone                                                                          | Piroxicam                                                                           | Tolazamide                                                                          |
|--------------------|-------------------------------------------------------------------------------------|-------------------------------------------------------------------------------------|-------------------------------------------------------------------------------------|
| Structure          | 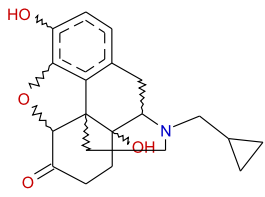 |  |  |
| Actual Endpoint    | Non-Carcinogen                                                                      | Non-Carcinogen                                                                      | Non-Carcinogen                                                                      |
| Predicted Endpoint | Non-Carcinogen                                                                      | Non-Carcinogen                                                                      | Non-Carcinogen                                                                      |
| Distance           | 0.632                                                                               | 0.660                                                                               | 0.661                                                                               |
| Reference          | US FDA (Centre for Drug Eval.& Res./Off. Testing & Res.) Sept. 1997                 | US FDA (Centre for Drug Eval.& Res./Off. Testing & Res.) Sept. 1997                 | US FDA (Centre for Drug Eval.& Res./Off. Testing & Res.) Sept. 1997                 |

## Model Applicability

Unknown features are fingerprint features in the query molecule, but not found or appearing too infrequently in the training set.

1. All properties and OPS components are within expected ranges.
2. Unknown ECFP\_2 feature: -7106223: [\*]C([\*])[C@@H](Cl)C(=[\*])[\*]
3. Unknown ECFP\_2 feature: 1652274794: [\*]OC(=C([\*])[\*])C([\*])[\*]

## Feature Contribution

### Top features for positive contribution

| Fingerprint | Bit/Smiles | Feature Structure                                                                                                           | Score | Carcinogen in training set |
|-------------|------------|-----------------------------------------------------------------------------------------------------------------------------|-------|----------------------------|
| ECFP_6      | 464808839  | 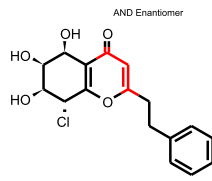<br><chem>[*]C(=CC(=[*])[*])[*]</chem> | 0.524 | 8 out of 14                |

| ECFP_6                                 | 105634199   | <p>AND Enantiomer</p> 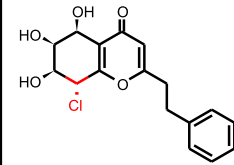 <p>[*]C([*])Cl</p>                            | 0.424  | 1 out of 1                 |
|----------------------------------------|-------------|---------------------------------------------------------------------------------------------------------------------------------------------------------|--------|----------------------------|
| ECFP_6                                 | 2106656448  | <p>AND Enantiomer</p>  <p>[*]C(=O)[*]</p>                            | 0.254  | 31 out of 77               |
| Top Features for negative contribution |             |                                                                                                                                                         |        |                            |
| Fingerprint                            | Bit/Smiles  | Feature Structure                                                                                                                                       | Score  | Carcinogen in training set |
| ECFP_6                                 | 1795792463  | <p>AND Enantiomer</p>  <p>[*]C([*])C(=C([*]))[*]<br/>)C(=[*])[*]</p> | -0.657 | 0 out of 3                 |
| ECFP_6                                 | 305695353   | <p>AND Enantiomer</p>  <p>[*]C([*])C(O)C([*])[*]<br/>]</p>          | -0.638 | 1 out of 9                 |
| ECFP_6                                 | -1567907747 | <p>AND Enantiomer</p>  <p>[*]C([*])C@@H(O)C(=[*])[*]</p>           | -0.27  | 0 out of 1                 |

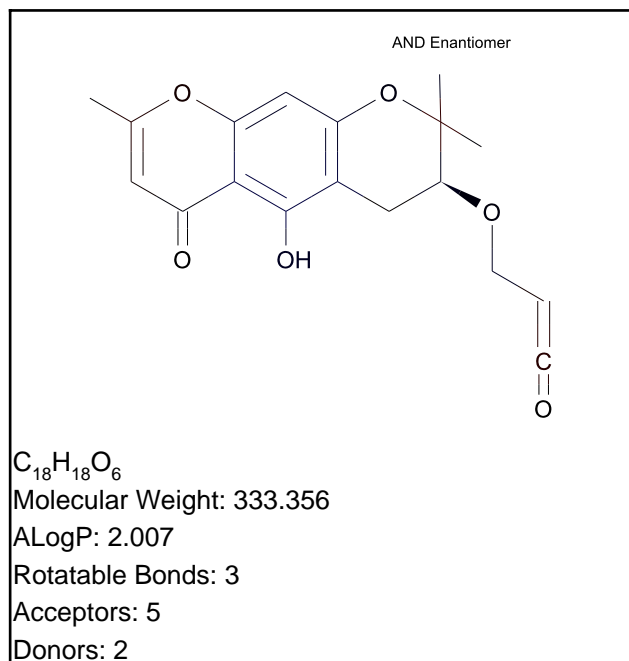

## Model Prediction

Prediction: Carcinogen

Probability: 0.273

Enrichment: 0.853

Bayesian Score: 0.488

Mahalanobis Distance: 13.7

Mahalanobis Distance p-value: 4.68e-005

Prediction: Positive if the Bayesian score is above the estimated best cutoff value from minimizing the false positive and false negative rate.

Probability: The estimated probability that the sample is in the positive category. This assumes that the Bayesian score follows a normal distribution and is different from the prediction using a cutoff.

Enrichment: An estimate of enrichment, that is, the increased likelihood (versus random) of this sample being in the category.

Bayesian Score: The standard Laplacian-modified Bayesian score.

Mahalanobis Distance: The Mahalanobis distance (MD) is the distance to the center of the training data. The larger the MD, the less trustworthy the prediction.

Mahalanobis Distance p-value: The p-value gives the fraction of training data with an MD greater than or equal to the one for the given sample, assuming normally distributed data. The smaller the p-value, the less trustworthy the prediction. For highly non-normal X properties (e.g., fingerprints), the MD p-value is wildly inaccurate.

## Structural Similar Compounds

| Name               | Naltrexone                                                                          | Tolazamide                                                                          | Indapamide                                                                          |
|--------------------|-------------------------------------------------------------------------------------|-------------------------------------------------------------------------------------|-------------------------------------------------------------------------------------|
| Structure          | 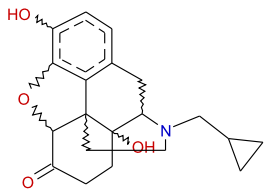 |  |  |
| Actual Endpoint    | Non-Carcinogen                                                                      | Non-Carcinogen                                                                      | Non-Carcinogen                                                                      |
| Predicted Endpoint | Non-Carcinogen                                                                      | Non-Carcinogen                                                                      | Non-Carcinogen                                                                      |
| Distance           | 0.538                                                                               | 0.567                                                                               | 0.596                                                                               |
| Reference          | US FDA (Centre for Drug Eval.& Res./Off. Testing & Res.) Sept. 1997                 | US FDA (Centre for Drug Eval.& Res./Off. Testing & Res.) Sept. 1997                 | US FDA (Centre for Drug Eval.& Res./Off. Testing & Res.) Sept. 1997                 |

## Model Applicability

Unknown features are fingerprint features in the query molecule, but not found or appearing too infrequently in the training set.

1. All properties and OPS components are within expected ranges.
2. Unknown ECFP\_2 feature: -331149802: [\*]O\C(=C/[\*])\C
3. Unknown ECFP\_2 feature: -1591590376: [\*]C=C=O
4. Unknown ECFP\_2 feature: 2106995136: [\*]=C=O
5. Unknown ECFP\_2 feature: -91536905: [\*]CC=C=O
6. Unknown ECFP\_2 feature: -1688150664: [\*]OCC=O

## Feature Contribution

### Top features for positive contribution

| Fingerprint | Bit/Smiles | Feature Structure | Score | Carcinogen in training set |
|-------------|------------|-------------------|-------|----------------------------|
|             |            |                   |       |                            |

|                                        |             |                                                                                                                                                             |        |                            |
|----------------------------------------|-------------|-------------------------------------------------------------------------------------------------------------------------------------------------------------|--------|----------------------------|
| ECFP_6                                 | -1114776580 | <p>AND Enantiomer</p> 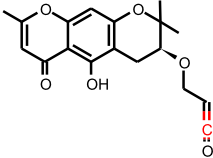 <p>[*]=C=[*]</p>                                  | 0.755  | 11 out of 15               |
| ECFP_6                                 | 464808839   | <p>AND Enantiomer</p>  <p>[*]C(=CC(=[*])[*])[*]</p>                      | 0.524  | 8 out of 14                |
| ECFP_6                                 | -200406221  | <p>AND Enantiomer</p>  <p>[*]C([*])([*])O[c](:[*])</p>                   | 0.451  | 3 out of 5                 |
| Top Features for negative contribution |             |                                                                                                                                                             |        |                            |
| Fingerprint                            | Bit/Smiles  | Feature Structure                                                                                                                                           | Score  | Carcinogen in training set |
| ECFP_6                                 | -1250019913 | <p>AND Enantiomer</p>  <p>[*]COC([*])[*]</p>                           | -0.482 | 0 out of 2                 |
| ECFP_6                                 | -813997308  | <p>AND Enantiomer</p>  <p>[*]C(=[*])[c](:[c]([*])[*]):[c]([*]):[*]</p> | -0.452 | 2 out of 12                |



ECFP\_6

-247712724

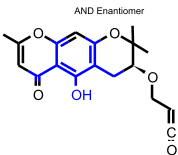

-0.27

0 out of 1

[\*]C[c]1:[c]([\*]):[\*]  
:[c]([\*]):[c](C(=[\*]  
)[\*]):[c]:1O

AND Enantiomer

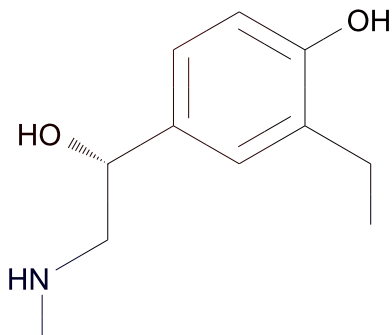C<sub>11</sub>H<sub>17</sub>NO<sub>2</sub>

Molecular Weight: 195.258

ALogP: 1.557

Rotatable Bonds: 4

Acceptors: 3

Donors: 3

## Model Prediction

Prediction: Non-Carcinogen

Probability: 0.229

Enrichment: 0.713

Bayesian Score: -2.17

Mahalanobis Distance: 8.94

Mahalanobis Distance p-value: 0.875

Prediction: Positive if the Bayesian score is above the estimated best cutoff value from minimizing the false positive and false negative rate.

Probability: The estimated probability that the sample is in the positive category. This assumes that the Bayesian score follows a normal distribution and is different from the prediction using a cutoff.

Enrichment: An estimate of enrichment, that is, the increased likelihood (versus random) of this sample being in the category.

Bayesian Score: The standard Laplacian-modified Bayesian score.

Mahalanobis Distance: The Mahalanobis distance (MD) is the distance to the center of the training data. The larger the MD, the less trustworthy the prediction.

Mahalanobis Distance p-value: The p-value gives the fraction of training data with an MD greater than or equal to the one for the given sample, assuming normally distributed data. The smaller the p-value, the less trustworthy the prediction. For highly non-normal X properties (e.g., fingerprints), the MD p-value is wildly inaccurate.

## Structural Similar Compounds

| Name               | Phenylephrine                                                       | Albuterol                                                           | Procabazine                                                         |
|--------------------|---------------------------------------------------------------------|---------------------------------------------------------------------|---------------------------------------------------------------------|
| Structure          |                                                                     |                                                                     |                                                                     |
| Actual Endpoint    | Non-Carcinogen                                                      | Non-Carcinogen                                                      | Carcinogen                                                          |
| Predicted Endpoint | Non-Carcinogen                                                      | Non-Carcinogen                                                      | Carcinogen                                                          |
| Distance           | 0.412                                                               | 0.474                                                               | 0.553                                                               |
| Reference          | US FDA (Centre for Drug Eval.& Res./Off. Testing & Res.) Sept. 1997 | US FDA (Centre for Drug Eval.& Res./Off. Testing & Res.) Sept. 1997 | US FDA (Centre for Drug Eval.& Res./Off. Testing & Res.) Sept. 1997 |

## Model Applicability

Unknown features are fingerprint features in the query molecule, but not found or appearing too infrequently in the training set.

1. All properties and OPS components are within expected ranges.

## Feature Contribution

### Top features for positive contribution

| Fingerprint | Bit/Smiles | Feature Structure                                                              | Score | Carcinogen in training set |
|-------------|------------|--------------------------------------------------------------------------------|-------|----------------------------|
| ECFP_6      | -566124999 | <p>AND Enantiomer</p> <p>[*]C[C@H](O)[c]1:[cH]:[cH]:[c](O):[c]([*]):[cH]:1</p> | 0.442 | 2 out of 3                 |

| ECFP_6                                 | -1438409867 | <p>AND Enantiomer</p> 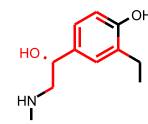 <p>[*]C[C@H](O)[c]1:[cH]<br/>:[cH]:[*]:[c]([*]):[<br/>cH]:1</p> | 0.337  | 3 out of 6                 |
|----------------------------------------|-------------|---------------------------------------------------------------------------------------------------------------------------------------------------------------------------|--------|----------------------------|
| ECFP_6                                 | 628100036   | <p>AND Enantiomer</p>  <p>[*]NC[C@H](O)[c]([cH]<br/>[H]):[cH]:[*]</p>                  | 0.279  | 4 out of 9                 |
| Top Features for negative contribution |             |                                                                                                                                                                           |        |                            |
| Fingerprint                            | Bit/Smiles  | Feature Structure                                                                                                                                                         | Score  | Carcinogen in training set |
| ECFP_6                                 | 1334400011  | <p>AND Enantiomer</p>  <p>[*][c](:[*]):[c](O):[<br/>cH]:[*]</p>                        | -0.496 | 3 out of 18                |
| ECFP_6                                 | 493154328   | <p>AND Enantiomer</p>  <p>[*]CNC</p>                                                 | -0.482 | 0 out of 2                 |
| ECFP_6                                 | -1910270391 | <p>AND Enantiomer</p>  <p>[*]C([*])[*]</p>                                           | -0.307 | 20 out of 89               |

AND Enantiomer

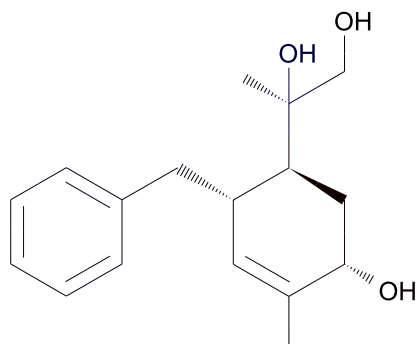 $C_{17}H_{24}O_3$ 

Molecular Weight: 276.371

ALogP: 2.165

Rotatable Bonds: 4

Acceptors: 3

Donors: 3

## Model Prediction

Prediction: Non-Carcinogen

Probability: 0.236

Enrichment: 0.735

Bayesian Score: -1.62

Mahalanobis Distance: 12.2

Mahalanobis Distance p-value: 0.00696

Prediction: Positive if the Bayesian score is above the estimated best cutoff value from minimizing the false positive and false negative rate.

Probability: The estimated probability that the sample is in the positive category. This assumes that the Bayesian score follows a normal distribution and is different from the prediction using a cutoff.

Enrichment: An estimate of enrichment, that is, the increased likelihood (versus random) of this sample being in the category.

Bayesian Score: The standard Laplacian-modified Bayesian score.

Mahalanobis Distance: The Mahalanobis distance (MD) is the distance to the center of the training data. The larger the MD, the less trustworthy the prediction.

Mahalanobis Distance p-value: The p-value gives the fraction of training data with an MD greater than or equal to the one for the given sample, assuming normally distributed data. The smaller the p-value, the less trustworthy the prediction. For highly non-normal X properties (e.g., fingerprints), the MD p-value is wildly inaccurate.

## Structural Similar Compounds

| Name               | Pindolol                                                            | Carteolol                                                           | Procabazine                                                         |
|--------------------|---------------------------------------------------------------------|---------------------------------------------------------------------|---------------------------------------------------------------------|
| Structure          |                                                                     |                                                                     |                                                                     |
| Actual Endpoint    | Non-Carcinogen                                                      | Non-Carcinogen                                                      | Carcinogen                                                          |
| Predicted Endpoint | Non-Carcinogen                                                      | Non-Carcinogen                                                      | Carcinogen                                                          |
| Distance           | 0.598                                                               | 0.623                                                               | 0.637                                                               |
| Reference          | US FDA (Centre for Drug Eval.& Res./Off. Testing & Res.) Sept. 1997 | US FDA (Centre for Drug Eval.& Res./Off. Testing & Res.) Sept. 1997 | US FDA (Centre for Drug Eval.& Res./Off. Testing & Res.) Sept. 1997 |

## Model Applicability

Unknown features are fingerprint features in the query molecule, but not found or appearing too infrequently in the training set.

- OPS PC18 out of range. Value: 4.5259. Training min, max, SD, explained variance: -3.8038, 4.1085, 1.337, 0.0182.
- Unknown ECFP\_2 feature: -2097867909: [\*]C[C@H](O)C(=[\*])[\*]
- Unknown ECFP\_2 feature: -327548242: [\*]C[C@@H](C([\*])[\*])C([\*])([\*])[\*]
- Unknown ECFP\_2 feature: -1263967621: [\*]C[C@@H](C(=[\*])C([\*])[\*])
- Unknown ECFP\_2 feature: -1042330089: [\*]C=C(C)/C([\*])[\*]
- Unknown ECFP\_2 feature: 1280892564: [\*]C[C@](C)(O)C([\*])[\*]
- Unknown ECFP\_2 feature: -1907755304: [\*]C([\*])([\*])CO
- Unknown ECFP\_2 feature: 771121623: [\*]C([\*])C[c](:[\*]):[\*]

## Feature Contribution

### Top features for positive contribution

| Fingerprint | Bit/Smiles | Feature Structure | Score | Carcinogen in training set |
|-------------|------------|-------------------|-------|----------------------------|
|-------------|------------|-------------------|-------|----------------------------|

|                                        |             |                                                                                                                                                    |        |                            |
|----------------------------------------|-------------|----------------------------------------------------------------------------------------------------------------------------------------------------|--------|----------------------------|
| ECFP_6                                 | -801490360  | <p>AND Enantiomer</p> 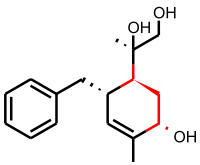 <p><chem>[*]C([*])CC([*])[*]</chem></p>  | 0.297  | 12 out of 28               |
| ECFP_6                                 | 470495651   | <p>AND Enantiomer</p>  <p><chem>[*]C([*])C=C([*])[*]</chem></p> | 0.2    | 4 out of 10                |
| ECFP_6                                 | 2022454958  | <p>AND Enantiomer</p>  <p><chem>[*]CO</chem></p>                | 0.135  | 9 out of 25                |
| Top Features for negative contribution |             |                                                                                                                                                    |        |                            |
| Fingerprint                            | Bit/Smiles  | Feature Structure                                                                                                                                  | Score  | Carcinogen in training set |
| ECFP_6                                 | 2025123907  | <p>AND Enantiomer</p>  <p><chem>[*]C([*])([*])O</chem></p>    | -1.05  | 0 out of 6                 |
| ECFP_6                                 | -1085223908 | <p>AND Enantiomer</p>  <p><chem>[*]C([*])([*])[*]</chem></p>  | -0.168 | 9 out of 35                |
|                                        |             |                                                                                                                                                    |        |                            |

|        |            |                                                                                                                          |        |               |
|--------|------------|--------------------------------------------------------------------------------------------------------------------------|--------|---------------|
| ECFP_6 | 1559650422 | <p>AND Enantiomer</p> 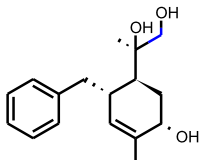 <p>[*]C[*]</p> | -0.164 | 50 out of 191 |
|--------|------------|--------------------------------------------------------------------------------------------------------------------------|--------|---------------|

# Simeprevir

# TOPKAT\_Mouse\_Female\_FDA\_None\_vs\_Carcinogen

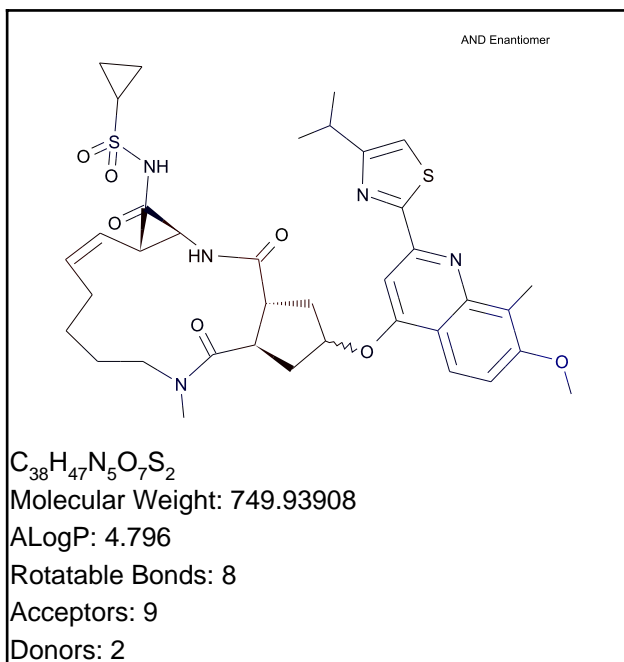

## Model Prediction

Prediction: Non-Carcinogen

Probability: 0.207

Enrichment: 0.646

Bayesian Score: -4.97

Mahalanobis Distance: 15.4

Mahalanobis Distance p-value: 4.64e-008

Prediction: Positive if the Bayesian score is above the estimated best cutoff value from minimizing the false positive and false negative rate.

Probability: The estimated probability that the sample is in the positive category. This assumes that the Bayesian score follows a normal distribution and is different from the prediction using a cutoff.

Enrichment: An estimate of enrichment, that is, the increased likelihood (versus random) of this sample being in the category. Bayesian Score: The standard Laplacian-modified Bayesian score.

Mahalanobis Distance: The Mahalanobis distance (MD) is the distance to the center of the training data. The larger the MD, the less trustworthy the prediction.

Mahalanobis Distance p-value: The p-value gives the fraction of training data with an MD greater than or equal to the one for the given sample, assuming normally distributed data. The smaller the p-value, the less trustworthy the prediction. For highly non-normal X properties (e.g., fingerprints), the MD p-value is wildly inaccurate.

## Structural Similar Compounds

| Name               | Reserpine                                                                           | Bromocriptine                                                                       | Itraconazole                                                                        |
|--------------------|-------------------------------------------------------------------------------------|-------------------------------------------------------------------------------------|-------------------------------------------------------------------------------------|
| Structure          | 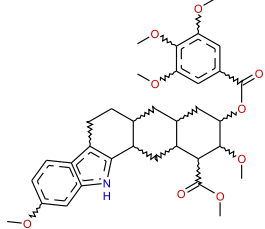 |  |  |
| Actual Endpoint    | Carcinogen                                                                          | Non-Carcinogen                                                                      | Non-Carcinogen                                                                      |
| Predicted Endpoint | Carcinogen                                                                          | Non-Carcinogen                                                                      | Non-Carcinogen                                                                      |
| Distance           | 0.783                                                                               | 0.847                                                                               | 0.870                                                                               |
| Reference          | US FDA (Centre for Drug Eval.& Res./Off. Testing & Res.) Sept. 1997                 | US FDA (Centre for Drug Eval.& Res./Off. Testing & Res.) Sept. 1997                 | US FDA (Centre for Drug Eval.& Res./Off. Testing & Res.) Sept. 1997                 |

## Model Applicability

Unknown features are fingerprint features in the query molecule, but not found or appearing too infrequently in the training set.

- OPS PC4 out of range. Value: 5.1697. Training min, max, SD, explained variance: -4.7116, 4.7287, 2.103, 0.0450.
- OPS PC14 out of range. Value: -3.7168. Training min, max, SD, explained variance: -3.5274, 4.3994, 1.457, 0.0216.
- OPS PC17 out of range. Value: 3.3515. Training min, max, SD, explained variance: -4.7306, 3.3103, 1.364, 0.0189.
- Unknown ECFP\_2 feature: -309676563: [\*]N[C@]1(C[C@H]1[\*])C(=[\*])[\*]
- Unknown ECFP\_2 feature: -1049290660: [\*]C1([\*])C[C@H]1C=[\*]
- Unknown ECFP\_2 feature: 360408239: [\*]C\C=C/[\*]
- Unknown ECFP\_2 feature: 1616402542: [\*]CN(C)C(=[\*])[\*]
- Unknown ECFP\_2 feature: -1818486371: [\*]NC(=O)C1([\*])[\*][\*]1
- Unknown ECFP\_2 feature: 1310940530: [\*]C([\*])O[c](:[\*]):[\*]
- Unknown ECFP\_2 feature: -253227249: [\*]:[c](:[\*])[c]1:n:[\*]:[\*]:s:1
- Unknown ECFP\_2 feature: 733491677: [\*]:[c](:[\*])C(C)C
- Unknown ECFP\_2 feature: 2121941848: [\*]NS(=O)(=O)C1[\*][\*]1
- Unknown ECFP\_2 feature: -622223421: [\*]S(=[\*])(=[\*])C1CC1

## Feature Contribution

Top features for positive contribution

| Fingerprint                            | Bit/Smiles  | Feature Structure                                                                                                                                                                 | Score | Carcinogen in training set |
|----------------------------------------|-------------|-----------------------------------------------------------------------------------------------------------------------------------------------------------------------------------|-------|----------------------------|
| ECFP_6                                 | -2095963820 | <p>AND Enantiomer</p> 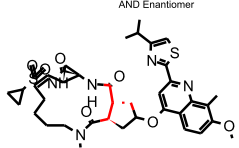 <p><chem>[*][C@@H]1[*][*]C[C@H]1C(=O)[*]</chem></p>                     | 0.891 | 12 out of 14               |
| ECFP_6                                 | 2082767335  | <p>AND Enantiomer</p>  <p><chem>[*][c](:[*]):[c]1:[cH]1:[cH]:[c]([*]):[*]:[c]:1:[*]</chem></p> | 0.617 | 2 out of 2                 |
| ECFP_6                                 | -1331088410 | <p>AND Enantiomer</p>  <p><chem>[*]CCC=[*]</chem></p>                                          | 0.442 | 2 out of 3                 |
| Top Features for negative contribution |             |                                                                                                                                                                                   |       |                            |
| Fingerprint                            | Bit/Smiles  | Feature Structure                                                                                                                                                                 | Score | Carcinogen in training set |
| ECFP_6                                 | 2077607946  | <p>AND Enantiomer</p>  <p><chem>[*]O[c]1:[cH]:[cH]:[c]1([*]):[*]:[c]:1[*]</chem></p>         | -1.15 | 0 out of 7                 |
|                                        |             |                                                                                                                                                                                   |       |                            |



|        |            |                                                                                                                                                  |        |             |
|--------|------------|--------------------------------------------------------------------------------------------------------------------------------------------------|--------|-------------|
| ECFP_6 | 1526862590 | <div>AND Enantiomer</div> 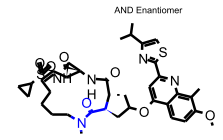 <div>[*]C([*])C(=O)N([*])[*]</div> | -0.638 | 1 out of 9  |
| ECFP_6 | 1307307440 | <div>AND Enantiomer</div>  <div>[*]:[c]([*])OC</div>          | -0.558 | 4 out of 25 |

AND Enantiomer

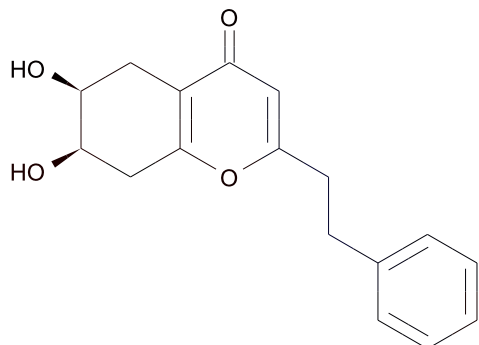 $C_{17}H_{18}O_4$ 

Molecular Weight: 286.322

ALogP: 1.568

Rotatable Bonds: 3

Acceptors: 4

Donors: 2

## Model Prediction

Prediction: Multiple-Carcinogen

Probability: 0.419

Enrichment: 1.02

Bayesian Score: 0.425

Mahalanobis Distance: 8.75

Mahalanobis Distance p-value: 0.113

Prediction: Positive if the Bayesian score is above the estimated best cutoff value from minimizing the false positive and false negative rate.

Probability: The estimated probability that the sample is in the positive category. This assumes that the Bayesian score follows a normal distribution and is different from the prediction using a cutoff.

Enrichment: An estimate of enrichment, that is, the increased likelihood (versus random) of this sample being in the category.

Bayesian Score: The standard Laplacian-modified Bayesian score.

Mahalanobis Distance: The Mahalanobis distance (MD) is the distance to the center of the training data. The larger the MD, the less trustworthy the prediction.

Mahalanobis Distance p-value: The p-value gives the fraction of training data with an MD greater than or equal to the one for the given sample, assuming normally distributed data. The smaller the p-value, the less trustworthy the prediction. For highly non-normal X properties (e.g., fingerprints), the MD p-value is wildly inaccurate.

## Structural Similar Compounds

| Name               | Phenobarbital                                                       | Oxazepam                                                            | Phenytoin                                                           |
|--------------------|---------------------------------------------------------------------|---------------------------------------------------------------------|---------------------------------------------------------------------|
| Structure          |                                                                     |                                                                     |                                                                     |
| Actual Endpoint    | Multiple-Carcinogen                                                 | Multiple-Carcinogen                                                 | Multiple-Carcinogen                                                 |
| Predicted Endpoint | Multiple-Carcinogen                                                 | Multiple-Carcinogen                                                 | Multiple-Carcinogen                                                 |
| Distance           | 0.601                                                               | 0.605                                                               | 0.635                                                               |
| Reference          | US FDA (Centre for Drug Eval.& Res./Off. Testing & Res.) Sept. 1997 | US FDA (Centre for Drug Eval.& Res./Off. Testing & Res.) Sept. 1997 | US FDA (Centre for Drug Eval.& Res./Off. Testing & Res.) Sept. 1997 |

## Model Applicability

Unknown features are fingerprint features in the query molecule, but not found or appearing too infrequently in the training set.

1. All properties and OPS components are within expected ranges.
2. Unknown ECFP\_2 feature: 1875238785: [\*]C\C(=C[\*])\O[\*]
3. Unknown ECFP\_2 feature: 1299558496: [\*]C(=[\*])C(=O)C=[\*]
4. Unknown ECFP\_2 feature: 1794461805: [\*]CC(=C([\*])[\*])C(=[\*])[\*]
5. Unknown ECFP\_2 feature: 1650944136: [\*]CC(=C([\*])[\*])O[\*]

## Feature Contribution

### Top features for positive contribution

| Fingerprint | Bit/Smiles | Feature Structure | Score | Multiple-Carcinogen in training set |
|-------------|------------|-------------------|-------|-------------------------------------|
|-------------|------------|-------------------|-------|-------------------------------------|

|                                        |            |                                                                                                                                                        |        |                                     |
|----------------------------------------|------------|--------------------------------------------------------------------------------------------------------------------------------------------------------|--------|-------------------------------------|
| ECFP_4                                 | 2024749573 | <p>AND Enantiomer</p> 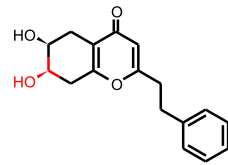 <p>[*]C([*])O</p>                            | 0.494  | 8 out of 11                         |
| ECFP_4                                 | -560785749 | <p>AND Enantiomer</p>  <p>[*]C(=[*])OC(=[*])[*]</p>                 | 0.351  | 1 out of 1                          |
| ECFP_4                                 | 1571214559 | <p>AND Enantiomer</p>  <p>[*]1:[cH]:[cH]:[cH]:[cH]:[cH]:1</p>       | 0.283  | 9 out of 16                         |
| Top Features for negative contribution |            |                                                                                                                                                        |        |                                     |
| Fingerprint                            | Bit/Smiles | Feature Structure                                                                                                                                      | Score  | Multiple-Carcinogen in training set |
| ECFP_4                                 | 1205550831 | <p>AND Enantiomer</p>  <p>[*]CC[c]1:[cH]:[cH]:[*]:[cH]:[cH]:1</p> | -0.545 | 1 out of 6                          |
| ECFP_4                                 | 464808839  | <p>AND Enantiomer</p>  <p>[*]C(=CC(=[*])[*])[*]</p>               | -0.352 | 2 out of 8                          |

|        |             |                                                                                                                                  |        |            |
|--------|-------------|----------------------------------------------------------------------------------------------------------------------------------|--------|------------|
| ECFP_4 | -1795525632 | <p>AND Enantiomer</p> 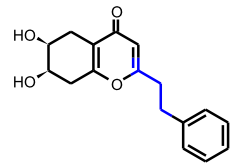 <p>[*]CCC(=[*])[*]</p> | -0.352 | 2 out of 8 |
|--------|-------------|----------------------------------------------------------------------------------------------------------------------------------|--------|------------|

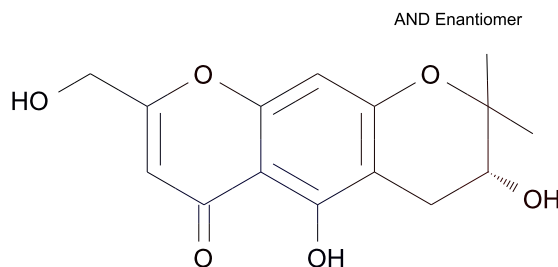

$C_{15}H_{16}O_6$

Molecular Weight: 292.284

ALogP: 0.901

Rotatable Bonds: 1

Acceptors: 6

Donors: 3

## Model Prediction

Prediction: Multiple-Carcinogen

Probability: 0.405

Enrichment: 0.987

Bayesian Score: 0.0887

Mahalanobis Distance: 11.3

Mahalanobis Distance p-value: 0.00148

Prediction: Positive if the Bayesian score is above the estimated best cutoff value from minimizing the false positive and false negative rate.

Probability: The estimated probability that the sample is in the positive category. This assumes that the Bayesian score follows a normal distribution and is different from the prediction using a cutoff.

Enrichment: An estimate of enrichment, that is, the increased likelihood (versus random) of this sample being in the category.

Bayesian Score: The standard Laplacian-modified Bayesian score.

Mahalanobis Distance: The Mahalanobis distance (MD) is the distance to the center of the training data. The larger the MD, the less trustworthy the prediction.

Mahalanobis Distance p-value: The p-value gives the fraction of training data with an MD greater than or equal to the one for the given sample, assuming normally distributed data. The smaller the p-value, the less trustworthy the prediction. For highly non-normal X properties (e.g., fingerprints), the MD p-value is wildly inaccurate.

## Structural Similar Compounds

| Name               | Triamcinolone                                                       | Zidovudine                                                          | Sulfamethazine                                                      |
|--------------------|---------------------------------------------------------------------|---------------------------------------------------------------------|---------------------------------------------------------------------|
| Structure          |                                                                     |                                                                     |                                                                     |
| Actual Endpoint    | Single-Carcinogen                                                   | Single-Carcinogen                                                   | Single-Carcinogen                                                   |
| Predicted Endpoint | Single-Carcinogen                                                   | Single-Carcinogen                                                   | Single-Carcinogen                                                   |
| Distance           | 0.670                                                               | 0.672                                                               | 0.704                                                               |
| Reference          | US FDA (Centre for Drug Eval.& Res./Off. Testing & Res.) Sept. 1997 | US FDA (Centre for Drug Eval.& Res./Off. Testing & Res.) Sept. 1997 | US FDA (Centre for Drug Eval.& Res./Off. Testing & Res.) Sept. 1997 |

## Model Applicability

Unknown features are fingerprint features in the query molecule, but not found or appearing too infrequently in the training set.

1. All properties and OPS components are within expected ranges.
2. Unknown ECFP\_2 feature: 1875238785: [\*]C\C(=C\[\*])\O[\*]
3. Unknown ECFP\_2 feature: 1299558496: [\*]C(=[\*])C(=O)C=[\*]
4. Unknown ECFP\_2 feature: 1778376725: [\*]OC(C)(C)C([\*])[\*]

## Feature Contribution

### Top features for positive contribution

| Fingerprint | Bit/Smiles | Feature Structure           | Score | Multiple-Carcinogen in training set |
|-------------|------------|-----------------------------|-------|-------------------------------------|
| ECFP_4      | 2024749573 | <br><chem>[*]C([*])O</chem> | 0.494 | 8 out of 11                         |

|                                        |            |                                                                                                                                                                  |        |                                     |
|----------------------------------------|------------|------------------------------------------------------------------------------------------------------------------------------------------------------------------|--------|-------------------------------------|
| ECFP_4                                 | -560785749 | 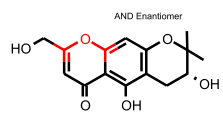 <p>AND Enantiomer</p> <chem>[*]C(=[*])OC(=[*])[*]</chem>                     | 0.351  | 1 out of 1                          |
| ECFP_4                                 | -570915357 |  <p>AND Enantiomer</p> <chem>[*]O[c](:[cH]:[*]):[c]([*]):[*]</chem>           | 0.351  | 1 out of 1                          |
| Top Features for negative contribution |            |                                                                                                                                                                  |        |                                     |
| Fingerprint                            | Bit/Smiles | Feature Structure                                                                                                                                                | Score  | Multiple-Carcinogen in training set |
| ECFP_4                                 | -813997308 |  <p>AND Enantiomer</p> <chem>[*]C(=[*])[c](:[c]([*]):[*]):[c]([*]):[*]</chem> | -0.597 | 0 out of 2                          |
| ECFP_4                                 | 464808839  |  <p>AND Enantiomer</p> <chem>[*]C(=CC(=[*])[*])[*]</chem>                   | -0.352 | 2 out of 8                          |
| ECFP_4                                 | 769217534  |  <p>AND Enantiomer</p> <chem>[*]C(=[*])CO</chem>                            | -0.342 | 0 out of 1                          |



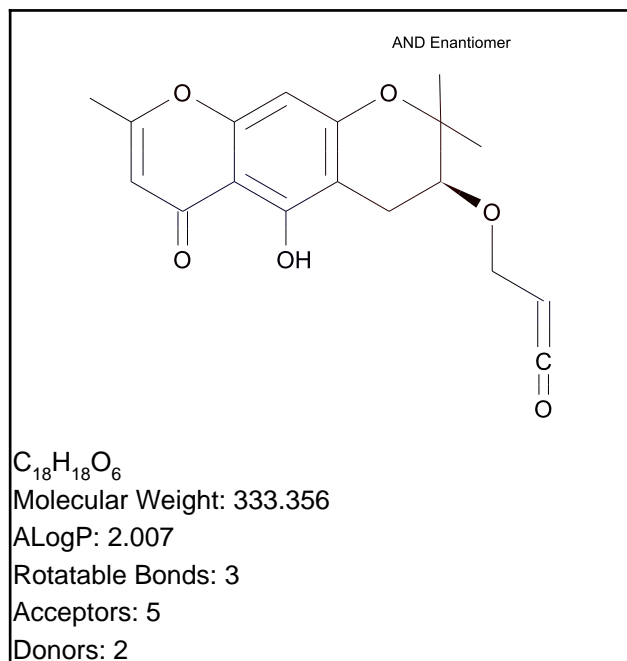

## Model Prediction

Prediction: Multiple-Carcinogen

Probability: 0.361

Enrichment: 0.879

Bayesian Score: -1.09

Mahalanobis Distance: 13.9

Mahalanobis Distance p-value: 7.96e-006

Prediction: Positive if the Bayesian score is above the estimated best cutoff value from minimizing the false positive and false negative rate.

Probability: The estimated probability that the sample is in the positive category. This assumes that the Bayesian score follows a normal distribution and is different from the prediction using a cutoff.

Enrichment: An estimate of enrichment, that is, the increased likelihood (versus random) of this sample being in the category.

Bayesian Score: The standard Laplacian-modified Bayesian score.

Mahalanobis Distance: The Mahalanobis distance (MD) is the distance to the center of the training data. The larger the MD, the less trustworthy the prediction.

Mahalanobis Distance p-value: The p-value gives the fraction of training data with an MD greater than or equal to the one for the given sample, assuming normally distributed data. The smaller the p-value, the less trustworthy the prediction. For highly non-normal X properties (e.g., fingerprints), the MD p-value is wildly inaccurate.

## Structural Similar Compounds

| Name               | Alizapride                                                                          | Phenolphthalein                                                                     | Sulfamethazine                                                                      |
|--------------------|-------------------------------------------------------------------------------------|-------------------------------------------------------------------------------------|-------------------------------------------------------------------------------------|
| Structure          | 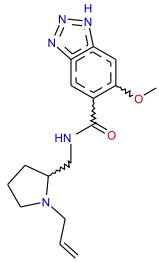 |  |  |
| Actual Endpoint    | Single-Carcinogen                                                                   | Multiple-Carcinogen                                                                 | Single-Carcinogen                                                                   |
| Predicted Endpoint | Single-Carcinogen                                                                   | Multiple-Carcinogen                                                                 | Single-Carcinogen                                                                   |
| Distance           | 0.633                                                                               | 0.657                                                                               | 0.665                                                                               |
| Reference          | US FDA (Centre for Drug Eval.& Res./Off. Testing & Res.) Sept. 1997                 | US FDA (Centre for Drug Eval.& Res./Off. Testing & Res.) Sept. 1997                 | US FDA (Centre for Drug Eval.& Res./Off. Testing & Res.) Sept. 1997                 |

## Model Applicability

Unknown features are fingerprint features in the query molecule, but not found or appearing too infrequently in the training set.

1. All properties and OPS components are within expected ranges.
2. Unknown ECFP\_2 feature: -331149802: [\*]O\C(=C/[\*])\C
3. Unknown ECFP\_2 feature: 1299558496: [\*]C(=[\*])C(=O)C=[\*]
4. Unknown ECFP\_2 feature: 1778376725: [\*]OC(C)(C)C([\*])[\*]
5. Unknown ECFP\_2 feature: -1591590376: [\*]C=C=O
6. Unknown ECFP\_2 feature: 2106995136: [\*]=C=O
7. Unknown ECFP\_2 feature: -91536905: [\*]CC=C=[\*]
8. Unknown ECFP\_2 feature: -1688150664: [\*]OCC=[\*]
9. Unknown ECFP\_2 feature: -1250019913: [\*]COC([\*])[\*]

## Feature Contribution

### Top features for positive contribution

| Fingerprint | Bit/Smiles | Feature Structure | Score | Multiple-Carcinogen in training set |
|-------------|------------|-------------------|-------|-------------------------------------|
|-------------|------------|-------------------|-------|-------------------------------------|



|                                        |             |                                                                                                                                                              |        |                                     |
|----------------------------------------|-------------|--------------------------------------------------------------------------------------------------------------------------------------------------------------|--------|-------------------------------------|
| ECFP_4                                 | -570915357  | <p>AND Enantiomer</p> 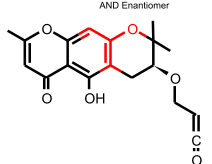 <p>[*]O[c](:[cH]:[*]):[c]([*]):[*]</p>             | 0.351  | 1 out of 1                          |
| ECFP_4                                 | -560785749  | <p>AND Enantiomer</p>  <p>[*]C(=[*])OC(=[*])([*])</p>                     | 0.351  | 1 out of 1                          |
| ECFP_4                                 | -2124995946 | <p>AND Enantiomer</p>  <p>[*]C[C@H](O[*])C([*])([*])</p>                  | 0.351  | 1 out of 1                          |
| Top Features for negative contribution |             |                                                                                                                                                              |        |                                     |
| Fingerprint                            | Bit/Smiles  | Feature Structure                                                                                                                                            | Score  | Multiple-Carcinogen in training set |
| ECFP_4                                 | -1925046727 | <p>AND Enantiomer</p>  <p>[*]C=[*]</p>                                  | -0.605 | 2 out of 11                         |
| ECFP_4                                 | -813997308  | <p>AND Enantiomer</p>  <p>[*]C(=[*])[c](:[c]([*]):[*]):[c]([*]):[*]</p> | -0.597 | 0 out of 2                          |

|        |           |                                                                                                                                                         |        |            |
|--------|-----------|---------------------------------------------------------------------------------------------------------------------------------------------------------|--------|------------|
| ECFP_4 | 464808839 | <p>AND Enantiomer</p> 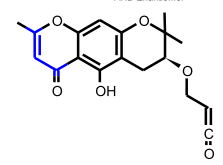 <p><chem>[*]C(=CC(=[*])[*])[*])[*]</chem></p> | -0.352 | 2 out of 8 |
|--------|-----------|---------------------------------------------------------------------------------------------------------------------------------------------------------|--------|------------|

AND Enantiomer

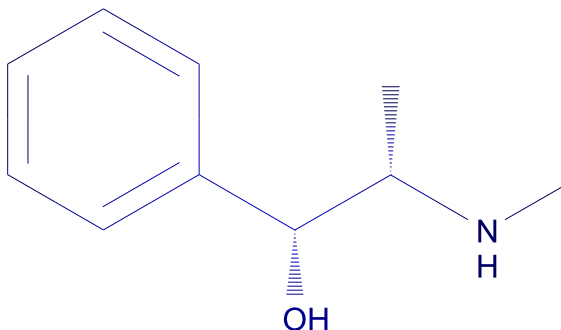C<sub>10</sub>H<sub>15</sub>NO

Molecular Weight: 165.232

ALogP: 1.234

Rotatable Bonds: 3

Acceptors: 2

Donors: 2

## Model Prediction

Prediction: Non-Carcinogen

Probability: 0.216

Enrichment: 0.735

Bayesian Score: -4

Mahalanobis Distance: 6.95

Mahalanobis Distance p-value: 1

Prediction: Positive if the Bayesian score is above the estimated best cutoff value from minimizing the false positive and false negative rate.

Probability: The estimated probability that the sample is in the positive category. This assumes that the Bayesian score follows a normal distribution and is different from the prediction using a cutoff.

Enrichment: An estimate of enrichment, that is, the increased likelihood (versus random) of this sample being in the category.

Bayesian Score: The standard Laplacian-modified Bayesian score.

Mahalanobis Distance: The Mahalanobis distance (MD) is the distance to the center of the training data. The larger the MD, the less trustworthy the prediction.

Mahalanobis Distance p-value: The p-value gives the fraction of training data with an MD greater than or equal to the one for the given sample, assuming normally distributed data. The smaller the p-value, the less trustworthy the prediction. For highly non-normal X properties (e.g., fingerprints), the MD p-value is wildly inaccurate.

## Structural Similar Compounds

| Name               | Ephedrine                                                           | Phenelzine                                                          | Amphetamine                                                         |
|--------------------|---------------------------------------------------------------------|---------------------------------------------------------------------|---------------------------------------------------------------------|
| Structure          |                                                                     |                                                                     |                                                                     |
| Actual Endpoint    | Non-Carcinogen                                                      | Non-Carcinogen                                                      | Non-Carcinogen                                                      |
| Predicted Endpoint | Non-Carcinogen                                                      | Non-Carcinogen                                                      | Non-Carcinogen                                                      |
| Distance           | 0.000                                                               | 0.484                                                               | 0.487                                                               |
| Reference          | US FDA (Centre for Drug Eval.& Res./Off. Testing & Res.) Sept. 1997 | US FDA (Centre for Drug Eval.& Res./Off. Testing & Res.) Sept. 1997 | US FDA (Centre for Drug Eval.& Res./Off. Testing & Res.) Sept. 1997 |

## Model Applicability

Unknown features are fingerprint features in the query molecule, but not found or appearing too infrequently in the training set.

1. All properties and OPS components are within expected ranges.

## Feature Contribution

### Top features for positive contribution

| Fingerprint | Bit/Smiles | Feature Structure                       | Score | Carcinogen in training set |
|-------------|------------|-----------------------------------------|-------|----------------------------|
| FCFP_6      | 136597326  | <p>AND Enantiomer</p> <p>[*]C([*])C</p> | 0.155 | 49 out of 159              |

|                                        |             |                                                                                                                                                                             |        |                            |
|----------------------------------------|-------------|-----------------------------------------------------------------------------------------------------------------------------------------------------------------------------|--------|----------------------------|
| FCFP_6                                 | 0           | <p>AND Enantiomer</p> 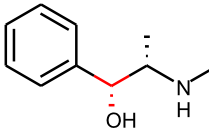 <p>[*]C([*])[*]</p>                                               | 0.114  | 90 out of 305              |
| FCFP_6                                 | 3           | <p>AND Enantiomer</p>  <p>[*]O</p>                                                       | 0.105  | 62 out of 212              |
| Top Features for negative contribution |             |                                                                                                                                                                             |        |                            |
| Fingerprint                            | Bit/Smiles  | Feature Structure                                                                                                                                                           | Score  | Carcinogen in training set |
| FCFP_6                                 | -1083860676 | <p>AND Enantiomer</p>  <p>[*]C([*])[C@H](O)[c]1<br/>:[cH]:[cH]:[cH]:[cH]<br/>:[cH]:1</p> | -0.719 | 0 out of 4                 |
| FCFP_6                                 | -239801958  | <p>AND Enantiomer</p>  <p>[*]N[C@@H](C)[C@H](O)<br/>:[c](:[cH]:[*]):[cH]:<br/>[*]</p>  | -0.423 | 0 out of 2                 |
| FCFP_6                                 | 223071155   | <p>AND Enantiomer</p>  <p>[*]C([*])[C@H](C)NC</p>                                      | -0.423 | 0 out of 2                 |

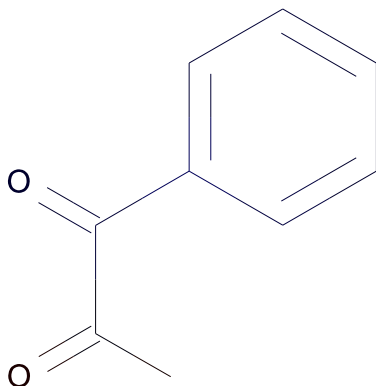C<sub>9</sub>H<sub>8</sub>O<sub>2</sub>

Molecular Weight: 148.159

ALogP: 1.446

Rotatable Bonds: 2

Acceptors: 2

Donors: 0

## Model Prediction

**Prediction: Carcinogen**

Probability: 0.312

Enrichment: 1.06

Bayesian Score: 0.23

Mahalanobis Distance: 10.3

Mahalanobis Distance p-value: 0.252

Prediction: Positive if the Bayesian score is above the estimated best cutoff value from minimizing the false positive and false negative rate.

Probability: The estimated probability that the sample is in the positive category. This assumes that the Bayesian score follows a normal distribution and is different from the prediction using a cutoff.

Enrichment: An estimate of enrichment, that is, the increased likelihood (versus random) of this sample being in the category.

Bayesian Score: The standard Laplacian-modified Bayesian score.

Mahalanobis Distance: The Mahalanobis distance (MD) is the distance to the center of the training data. The larger the MD, the less trustworthy the prediction.

Mahalanobis Distance p-value: The p-value gives the fraction of training data with an MD greater than or equal to the one for the given sample, assuming normally distributed data. The smaller the p-value, the less trustworthy the prediction. For highly non-normal X properties (e.g., fingerprints), the MD p-value is wildly inaccurate.

## Structural Similar Compounds

| Name               | Coumarin                                                            | Amphetamine                                                         | Benzyl alcohol                                                      |
|--------------------|---------------------------------------------------------------------|---------------------------------------------------------------------|---------------------------------------------------------------------|
| Structure          |                                                                     |                                                                     |                                                                     |
| Actual Endpoint    | Carcinogen                                                          | Non-Carcinogen                                                      | Non-Carcinogen                                                      |
| Predicted Endpoint | Carcinogen                                                          | Non-Carcinogen                                                      | Carcinogen                                                          |
| Distance           | 0.520                                                               | 0.524                                                               | 0.538                                                               |
| Reference          | US FDA (Centre for Drug Eval.& Res./Off. Testing & Res.) Sept. 1997 | US FDA (Centre for Drug Eval.& Res./Off. Testing & Res.) Sept. 1997 | US FDA (Centre for Drug Eval.& Res./Off. Testing & Res.) Sept. 1997 |

## Model Applicability

Unknown features are fingerprint features in the query molecule, but not found or appearing too infrequently in the training set.

1. All properties and OPS components are within expected ranges.

## Feature Contribution

### Top features for positive contribution

| Fingerprint | Bit/Smiles | Feature Structure    | Score | Carcinogen in training set |
|-------------|------------|----------------------|-------|----------------------------|
| FCFP_6      | 565968762  | <br>[*]C(=[*])C(=O)C | 0.245 | 7 out of 20                |

|                                        |             |                                                                                                                                                     |        |                            |
|----------------------------------------|-------------|-----------------------------------------------------------------------------------------------------------------------------------------------------|--------|----------------------------|
| FCFP_6                                 | 1872154524  | 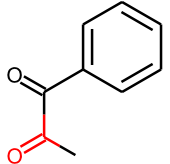<br><chem>[*]C(=O)[*]</chem>                                     | 0.205  | 69 out of 213              |
| FCFP_6                                 | 136597326   | <br><chem>[*]C([*])C</chem>                                      | 0.155  | 49 out of 159              |
| Top Features for negative contribution |             |                                                                                                                                                     |        |                            |
| Fingerprint                            | Bit/Smiles  | Feature Structure                                                                                                                                   | Score  | Carcinogen in training set |
| FCFP_6                                 | -1549192822 | <br><chem>[*]C(=[*])C(=O)[c]([*])[*]</chem>                      | -0.489 | 3 out of 21                |
| FCFP_6                                 | 975909016   | <br><chem>[*]C(=[*])C(=O)[c]1:[cH]:[cH]:[cH]:[cH]:[cH]:1</chem> | -0.233 | 0 out of 1                 |
| FCFP_6                                 | -1698724694 | <br><chem>[*]C([*])[c]1:[cH]:[cH]:[cH]:[cH]:[cH]:1</chem>      | -0.22  | 15 out of 72               |

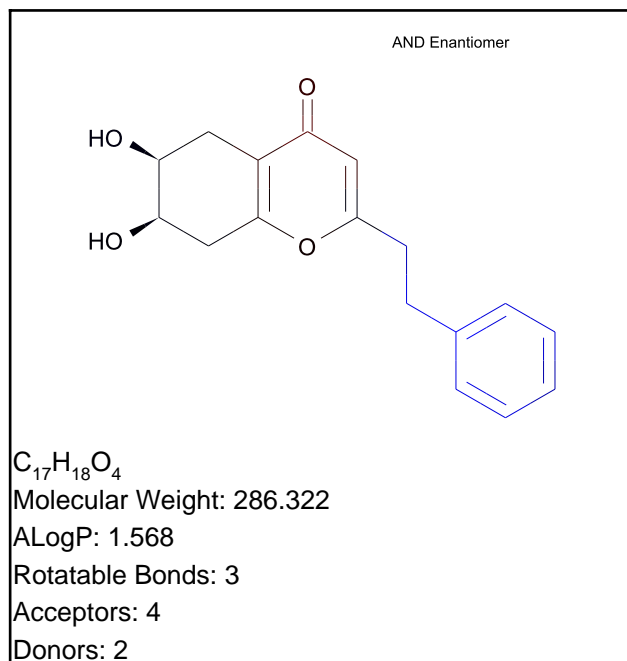

## Model Prediction

Prediction: Non-Carcinogen

Probability: 0.209

Enrichment: 0.712

Bayesian Score: -4.4

Mahalanobis Distance: 11.4

Mahalanobis Distance p-value: 0.0288

Prediction: Positive if the Bayesian score is above the estimated best cutoff value from minimizing the false positive and false negative rate.

Probability: The estimated probability that the sample is in the positive category. This assumes that the Bayesian score follows a normal distribution and is different from the prediction using a cutoff.

Enrichment: An estimate of enrichment, that is, the increased likelihood (versus random) of this sample being in the category.

Bayesian Score: The standard Laplacian-modified Bayesian score.

Mahalanobis Distance: The Mahalanobis distance (MD) is the distance to the center of the training data. The larger the MD, the less trustworthy the prediction.

Mahalanobis Distance p-value: The p-value gives the fraction of training data with an MD greater than or equal to the one for the given sample, assuming normally distributed data. The smaller the p-value, the less trustworthy the prediction. For highly non-normal X properties (e.g., fingerprints), the MD p-value is wildly inaccurate.

## Structural Similar Compounds

| Name               | Tolazamide                                                                          | Naltrexone                                                                          | Phenobarbital                                                                       |
|--------------------|-------------------------------------------------------------------------------------|-------------------------------------------------------------------------------------|-------------------------------------------------------------------------------------|
| Structure          | 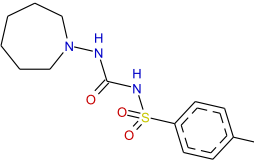 |  |  |
| Actual Endpoint    | Non-Carcinogen                                                                      | Non-Carcinogen                                                                      | Carcinogen                                                                          |
| Predicted Endpoint | Non-Carcinogen                                                                      | Non-Carcinogen                                                                      | Carcinogen                                                                          |
| Distance           | 0.524                                                                               | 0.581                                                                               | 0.584                                                                               |
| Reference          | US FDA (Centre for Drug Eval.& Res./Off. Testing & Res.) Sept. 1997                 | US FDA (Centre for Drug Eval.& Res./Off. Testing & Res.) Sept. 1997                 | US FDA (Centre for Drug Eval.& Res./Off. Testing & Res.) Sept. 1997                 |

## Model Applicability

Unknown features are fingerprint features in the query molecule, but not found or appearing too infrequently in the training set.

- OPS PC25 out of range. Value: -3.472. Training min, max, SD, explained variance: -3.0329, 3.839, 1.061, 0.0118.

## Feature Contribution

### Top features for positive contribution

| Fingerprint | Bit/Smiles | Feature Structure                                                                                                           | Score | Carcinogen in training set |
|-------------|------------|-----------------------------------------------------------------------------------------------------------------------------|-------|----------------------------|
| FCFP_6      | 451847724  | 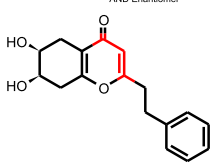<br><chem>*[C](=CC(=[*])[*])[*]</chem> | 0.479 | 21 out of 48               |

|                                        |            |                                                                                                                                                          |       |                            |
|----------------------------------------|------------|----------------------------------------------------------------------------------------------------------------------------------------------------------|-------|----------------------------|
| FCFP_6                                 | 859241794  | <p>AND Enantiomer</p> 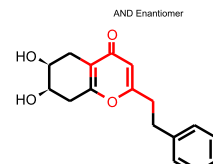 <p>[*]CC1=CC(=O)C(=[*]O1)[*]</p>                | 0.46  | 1 out of 1                 |
| FCFP_6                                 | 436886043  | <p>AND Enantiomer</p>  <p>[*]CC(=C([*])([*])C(=[*])O1)[*]</p>         | 0.306 | 15 out of 41               |
| Top Features for negative contribution |            |                                                                                                                                                          |       |                            |
| Fingerprint                            | Bit/Smiles | Feature Structure                                                                                                                                        | Score | Carcinogen in training set |
| FCFP_6                                 | 1981711554 | <p>AND Enantiomer</p>  <p>[*]CC[c]1:[cH]:[cH]:[cH]:[cH]:[cH]:1</p>    | -1.42 | 0 out of 12                |
| FCFP_6                                 | 1388176727 | <p>AND Enantiomer</p>  <p>[*]C(=[*])CC[c]1:[cH]:[cH]:[cH]:[cH]:1</p> | -1.21 | 0 out of 9                 |
| FCFP_6                                 | 497728148  | <p>AND Enantiomer</p>  <p>[*]CC[c]1:[cH]:[cH]:[cH]:[cH]:1</p>       | -0.96 | 2 out of 26                |



AND Enantiomer

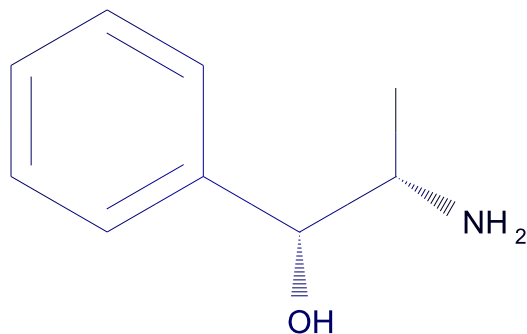C<sub>9</sub>H<sub>13</sub>NO

Molecular Weight: 151.206

ALogP: 0.802

Rotatable Bonds: 2

Acceptors: 2

Donors: 2

## Model Prediction

Prediction: Non-Carcinogen

Probability: 0.257

Enrichment: 0.872

Bayesian Score: -1.99

Mahalanobis Distance: 7.67

Mahalanobis Distance p-value: 0.996

Prediction: Positive if the Bayesian score is above the estimated best cutoff value from minimizing the false positive and false negative rate.

Probability: The estimated probability that the sample is in the positive category. This assumes that the Bayesian score follows a normal distribution and is different from the prediction using a cutoff.

Enrichment: An estimate of enrichment, that is, the increased likelihood (versus random) of this sample being in the category.

Bayesian Score: The standard Laplacian-modified Bayesian score.

Mahalanobis Distance: The Mahalanobis distance (MD) is the distance to the center of the training data. The larger the MD, the less trustworthy the prediction.

Mahalanobis Distance p-value: The p-value gives the fraction of training data with an MD greater than or equal to the one for the given sample, assuming normally distributed data. The smaller the p-value, the less trustworthy the prediction. For highly non-normal X properties (e.g., fingerprints), the MD p-value is wildly inaccurate.

## Structural Similar Compounds

| Name               | Ephedrine                                                           | Phenelzine                                                          | Tocainide                                                           |
|--------------------|---------------------------------------------------------------------|---------------------------------------------------------------------|---------------------------------------------------------------------|
| Structure          |                                                                     |                                                                     |                                                                     |
| Actual Endpoint    | Non-Carcinogen                                                      | Non-Carcinogen                                                      | Non-Carcinogen                                                      |
| Predicted Endpoint | Non-Carcinogen                                                      | Non-Carcinogen                                                      | Carcinogen                                                          |
| Distance           | 0.308                                                               | 0.429                                                               | 0.458                                                               |
| Reference          | US FDA (Centre for Drug Eval.& Res./Off. Testing & Res.) Sept. 1997 | US FDA (Centre for Drug Eval.& Res./Off. Testing & Res.) Sept. 1997 | US FDA (Centre for Drug Eval.& Res./Off. Testing & Res.) Sept. 1997 |

## Model Applicability

Unknown features are fingerprint features in the query molecule, but not found or appearing too infrequently in the training set.

1. All properties and OPS components are within expected ranges.

## Feature Contribution

### Top features for positive contribution

| Fingerprint | Bit/Smiles | Feature Structure                       | Score | Carcinogen in training set |
|-------------|------------|-----------------------------------------|-------|----------------------------|
| FCFP_6      | 136597326  | <p>AND Enantiomer</p> <p>[*]C([*])C</p> | 0.155 | 49 out of 159              |

|                                        |             |                                                                                                                                                                                 |        |                            |
|----------------------------------------|-------------|---------------------------------------------------------------------------------------------------------------------------------------------------------------------------------|--------|----------------------------|
| FCFP_6                                 | 0           | <p>AND Enantiomer</p> 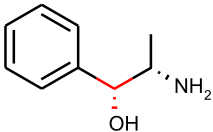 <p>[*]C([*])[*]</p>                                                   | 0.114  | 90 out of 305              |
| FCFP_6                                 | 3           | <p>AND Enantiomer</p>  <p>[*]O</p>                                                           | 0.105  | 62 out of 212              |
| Top Features for negative contribution |             |                                                                                                                                                                                 |        |                            |
| Fingerprint                            | Bit/Smiles  | Feature Structure                                                                                                                                                               | Score  | Carcinogen in training set |
| FCFP_6                                 | -1083860676 | <p>AND Enantiomer</p>  <p>[*]C([*])([C@H](O)[c]1<br/>:[cH]:[cH]:[cH]:[cH]<br/>:[cH]:1</p>    | -0.719 | 0 out of 4                 |
| FCFP_6                                 | -239801958  | <p>AND Enantiomer</p>  <p>[*]N[C@@H](C)[C@H](O)<br/>:[c](:[cH]:[*]):[cH]:<br/>:[*]</p>     | -0.423 | 0 out of 2                 |
| FCFP_6                                 | -1931573337 | <p>AND Enantiomer</p>  <p>[*]C([*])([C@H](O)[c]1<br/>:[cH]:[cH]:[*]):[cH]:<br/>:[cH]:1</p> | -0.387 | 2 out of 13                |

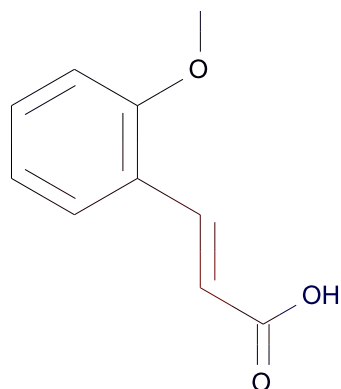C<sub>10</sub>H<sub>10</sub>O<sub>3</sub>

Molecular Weight: 178.185

ALogP: 1.911

Rotatable Bonds: 3

Acceptors: 3

Donors: 1

## Model Prediction

**Prediction: Carcinogen**

Probability: 0.265

Enrichment: 0.901

Bayesian Score: -1.62

Mahalanobis Distance: 10.4

Mahalanobis Distance p-value: 0.207

Prediction: Positive if the Bayesian score is above the estimated best cutoff value from minimizing the false positive and false negative rate.

Probability: The estimated probability that the sample is in the positive category. This assumes that the Bayesian score follows a normal distribution and is different from the prediction using a cutoff.

Enrichment: An estimate of enrichment, that is, the increased likelihood (versus random) of this sample being in the category.

Bayesian Score: The standard Laplacian-modified Bayesian score.

Mahalanobis Distance: The Mahalanobis distance (MD) is the distance to the center of the training data. The larger the MD, the less trustworthy the prediction.

Mahalanobis Distance p-value: The p-value gives the fraction of training data with an MD greater than or equal to the one for the given sample, assuming normally distributed data. The smaller the p-value, the less trustworthy the prediction. For highly non-normal X properties (e.g., fingerprints), the MD p-value is wildly inaccurate.

## Structural Similar Compounds

| Name               | Aspirin                                                             | Coumarin                                                            | Eugenol                                                             |
|--------------------|---------------------------------------------------------------------|---------------------------------------------------------------------|---------------------------------------------------------------------|
| Structure          |                                                                     |                                                                     |                                                                     |
| Actual Endpoint    | Non-Carcinogen                                                      | Carcinogen                                                          | Non-Carcinogen                                                      |
| Predicted Endpoint | Non-Carcinogen                                                      | Carcinogen                                                          | Non-Carcinogen                                                      |
| Distance           | 0.466                                                               | 0.498                                                               | 0.529                                                               |
| Reference          | US FDA (Centre for Drug Eval.& Res./Off. Testing & Res.) Sept. 1997 | US FDA (Centre for Drug Eval.& Res./Off. Testing & Res.) Sept. 1997 | US FDA (Centre for Drug Eval.& Res./Off. Testing & Res.) Sept. 1997 |

## Model Applicability

Unknown features are fingerprint features in the query molecule, but not found or appearing too infrequently in the training set.

1. All properties and OPS components are within expected ranges.

## Feature Contribution

### Top features for positive contribution

| Fingerprint | Bit/Smiles | Feature Structure                             | Score | Carcinogen in training set |
|-------------|------------|-----------------------------------------------|-------|----------------------------|
| FCFP_6      | -146015125 | <br><chem>[*]C(=[*])C=C\c1c([*]cH1)[*]</chem> | 0.676 | 2 out of 2                 |

| FCFP_6                                 | 451847724   | 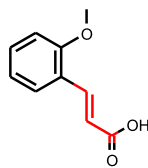<br><chem>[*]C(=CC(=O)O)[*]</chem>                        | 0.479  | 21 out of 48               |
|----------------------------------------|-------------|----------------------------------------------------------------------------------------------------------------------------------------------|--------|----------------------------|
| FCFP_6                                 | -395337223  | <br><chem>[*]O[c]1:[cH]:[*]:[cH]:[cH]:[c]:1\C=C[*]</chem> | 0.46   | 1 out of 1                 |
| Top Features for negative contribution |             |                                                                                                                                              |        |                            |
| Fingerprint                            | Bit/Smiles  | Feature Structure                                                                                                                            | Score  | Carcinogen in training set |
| FCFP_6                                 | 1458856986  | <br><chem>[*]=C[c]1:[cH]:[cH]:[cH]:[cH]:[c]:1OC</chem>    | -0.439 | 1 out of 8                 |
| FCFP_6                                 | -2107131107 | <br><chem>[*]\C=C\C(=O)O</chem>                          | -0.423 | 0 out of 2                 |
| FCFP_6                                 | -548632217  | <br><chem>[*]C(=O)O</chem>                              | -0.383 | 9 out of 52                |

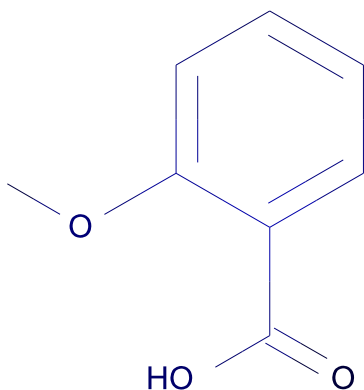

$C_8H_8O_3$

Molecular Weight: 152.147

ALogP: 1.443

Rotatable Bonds: 2

Acceptors: 3

Donors: 1

## Model Prediction

Prediction: Non-Carcinogen

Probability: 0.234

Enrichment: 0.797

Bayesian Score: -3.04

Mahalanobis Distance: 11.2

Mahalanobis Distance p-value: 0.0485

Prediction: Positive if the Bayesian score is above the estimated best cutoff value from minimizing the false positive and false negative rate.

Probability: The estimated probability that the sample is in the positive category. This assumes that the Bayesian score follows a normal distribution and is different from the prediction using a cutoff.

Enrichment: An estimate of enrichment, that is, the increased likelihood (versus random) of this sample being in the category.

Bayesian Score: The standard Laplacian-modified Bayesian score.

Mahalanobis Distance: The Mahalanobis distance (MD) is the distance to the center of the training data. The larger the MD, the less trustworthy the prediction.

Mahalanobis Distance p-value: The p-value gives the fraction of training data with an MD greater than or equal to the one for the given sample, assuming normally distributed data. The smaller the p-value, the less trustworthy the prediction. For highly non-normal X properties (e.g., fingerprints), the MD p-value is wildly inaccurate.

## Structural Similar Compounds

| Name               | Aspirin                                                             | Nicotinic acid                                                      | Coumarin                                                            |
|--------------------|---------------------------------------------------------------------|---------------------------------------------------------------------|---------------------------------------------------------------------|
| Structure          |                                                                     |                                                                     |                                                                     |
| Actual Endpoint    | Non-Carcinogen                                                      | Non-Carcinogen                                                      | Carcinogen                                                          |
| Predicted Endpoint | Non-Carcinogen                                                      | Carcinogen                                                          | Carcinogen                                                          |
| Distance           | 0.271                                                               | 0.528                                                               | 0.551                                                               |
| Reference          | US FDA (Centre for Drug Eval.& Res./Off. Testing & Res.) Sept. 1997 | US FDA (Centre for Drug Eval.& Res./Off. Testing & Res.) Sept. 1997 | US FDA (Centre for Drug Eval.& Res./Off. Testing & Res.) Sept. 1997 |

## Model Applicability

Unknown features are fingerprint features in the query molecule, but not found or appearing too infrequently in the training set.

1. All properties and OPS components are within expected ranges.

## Feature Contribution

### Top features for positive contribution

| Fingerprint | Bit/Smiles | Feature Structure | Score | Carcinogen in training set |
|-------------|------------|-------------------|-------|----------------------------|
| FCFP_6      | 1872154524 | <br>[*]C(=O)[*]   | 0.205 | 69 out of 213              |

| FCFP_6                                 | 0           | 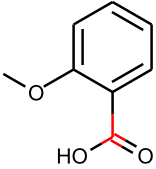<br><chem>[*]C([*])[*]</chem>                               | 0.114  | 90 out of 305              |
|----------------------------------------|-------------|------------------------------------------------------------------------------------------------------------------------------------------------|--------|----------------------------|
| FCFP_6                                 | 1           | <br><chem>[*]=O</chem>                                      | 0.0783 | 76 out of 267              |
| Top Features for negative contribution |             |                                                                                                                                                |        |                            |
| Fingerprint                            | Bit/Smiles  | Feature Structure                                                                                                                              | Score  | Carcinogen in training set |
| FCFP_6                                 | 1458856986  | <br><chem>[*]=C[c]1:[cH]:[cH]:[cH]:[cH]:[cH]:[c]:1OC</chem> | -0.439 | 1 out of 8                 |
| FCFP_6                                 | -548632217  | <br><chem>[*]C(=[*])O</chem>                               | -0.383 | 9 out of 52                |
| FCFP_6                                 | -1549222613 | <br><chem>[*]:[c](:[*])C(=O)O</chem>                      | -0.351 | 1 out of 7                 |

AND Enantiomer

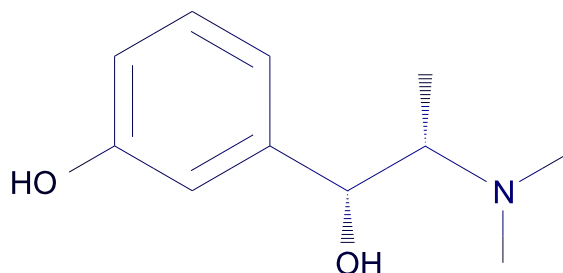C<sub>11</sub>H<sub>17</sub>NO<sub>2</sub>

Molecular Weight: 195.258

ALogP: 1.528

Rotatable Bonds: 3

Acceptors: 3

Donors: 2

## Model Prediction

Prediction: Non-Carcinogen

Probability: 0.2

Enrichment: 0.678

Bayesian Score: -5.01

Mahalanobis Distance: 11.5

Mahalanobis Distance p-value: 0.0255

Prediction: Positive if the Bayesian score is above the estimated best cutoff value from minimizing the false positive and false negative rate.

Probability: The estimated probability that the sample is in the positive category. This assumes that the Bayesian score follows a normal distribution and is different from the prediction using a cutoff.

Enrichment: An estimate of enrichment, that is, the increased likelihood (versus random) of this sample being in the category.

Bayesian Score: The standard Laplacian-modified Bayesian score.

Mahalanobis Distance: The Mahalanobis distance (MD) is the distance to the center of the training data. The larger the MD, the less trustworthy the prediction.

Mahalanobis Distance p-value: The p-value gives the fraction of training data with an MD greater than or equal to the one for the given sample, assuming normally distributed data. The smaller the p-value, the less trustworthy the prediction. For highly non-normal X properties (e.g., fingerprints), the MD p-value is wildly inaccurate.

## Structural Similar Compounds

| Name               | Phenylephrine                                                       | Ephedrine                                                           | Tocainide                                                           |
|--------------------|---------------------------------------------------------------------|---------------------------------------------------------------------|---------------------------------------------------------------------|
| Structure          |                                                                     |                                                                     |                                                                     |
| Actual Endpoint    | Non-Carcinogen                                                      | Non-Carcinogen                                                      | Non-Carcinogen                                                      |
| Predicted Endpoint | Non-Carcinogen                                                      | Non-Carcinogen                                                      | Carcinogen                                                          |
| Distance           | 0.458                                                               | 0.463                                                               | 0.534                                                               |
| Reference          | US FDA (Centre for Drug Eval.& Res./Off. Testing & Res.) Sept. 1997 | US FDA (Centre for Drug Eval.& Res./Off. Testing & Res.) Sept. 1997 | US FDA (Centre for Drug Eval.& Res./Off. Testing & Res.) Sept. 1997 |

## Model Applicability

Unknown features are fingerprint features in the query molecule, but not found or appearing too infrequently in the training set.

1. All properties and OPS components are within expected ranges.

## Feature Contribution

### Top features for positive contribution

| Fingerprint | Bit/Smiles | Feature Structure                                    | Score | Carcinogen in training set |
|-------------|------------|------------------------------------------------------|-------|----------------------------|
| FCFP_6      | -158888774 | <br><chem>[*][c]1:[*]:[cH]:[cH]:[c](O):[cH]:1</chem> | 0.367 | 5 out of 12                |

|                                        |             |                                                                                                                                                                             |        |                            |
|----------------------------------------|-------------|-----------------------------------------------------------------------------------------------------------------------------------------------------------------------------|--------|----------------------------|
| FCFP_6                                 | 136597326   | <p>AND Enantiomer</p> 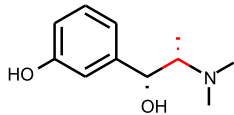 <p>[*]C([*])C</p>                                                 | 0.155  | 49 out of 159              |
| FCFP_6                                 | 0           | <p>AND Enantiomer</p>  <p>[*]C([*])[*]</p>                                               | 0.114  | 90 out of 305              |
| Top Features for negative contribution |             |                                                                                                                                                                             |        |                            |
| Fingerprint                            | Bit/Smiles  | Feature Structure                                                                                                                                                           | Score  | Carcinogen in training set |
| FCFP_6                                 | -1083860676 | <p>AND Enantiomer</p>  <p>[*]C([*])[C@H](O)[c]1<br/>:[cH]:[cH]:[cH]:[cH]<br/>:[cH]:1</p> | -0.719 | 0 out of 4                 |
| FCFP_6                                 | -1946918893 | <p>AND Enantiomer</p>  <p>[*]C([*])[C@H](C)N([*]<br/>)[*]</p>                          | -0.692 | 2 out of 19                |
| FCFP_6                                 | -1343180157 | <p>AND Enantiomer</p>  <p>[*]C([*])N(C)C</p>                                           | -0.533 | 9 out of 61                |



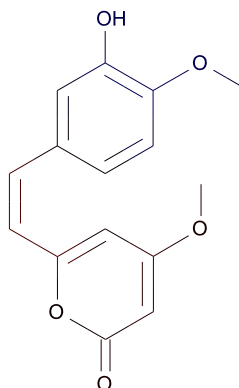
$$\text{C}_{15}\text{H}_{14}\text{O}_5$$

Molecular Weight: 274.269

|ALogP: 1.969

Rotatable Bonds: 4

Acceptors: 5

Donors: 1

## Model Prediction

**Prediction: Carcinogen**

Probability: 0.295

Enrichment: 1

Bayesian Score: -0.404

Mahalanobis Distance: 13.1

Mahalanobis Distance p-value: 0.000195

Prediction: Positive if the Bayesian score is above the estimated best cutoff value from minimizing the false positive and false negative rate.

**Probability:** The estimated probability that the sample is in the positive category. This assumes that the Bayesian score follows a normal distribution and is different from the prediction using a cutoff.

Enrichment: An estimate of enrichment, that is, the increased likelihood (versus random) of this sample being in the category.  
Bayesian Score: The standard Laplacian-modified Bayesian score.

**Mahalanobis Distance:** The Mahalanobis distance (MD) is the distance to the center of the training data. The larger the MD, the less trustworthy the prediction.

Mahalanobis Distance p-value: The p-value gives the fraction of training data with an MD greater than or equal to the one for the given sample, assuming normally distributed data. The smaller the p-value, the less trustworthy the prediction. For highly non-normal X properties (e.g., fingerprints), the MD p-value is wildly inaccurate.

## Structural Similar Compounds

| Name               | Cytembena                                                                           | Scopolamine                                                                         | Omeprazole                                                                          |
|--------------------|-------------------------------------------------------------------------------------|-------------------------------------------------------------------------------------|-------------------------------------------------------------------------------------|
| Structure          | 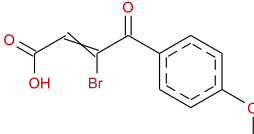 |  |  |
| Actual Endpoint    | Non-Carcinogen                                                                      | Non-Carcinogen                                                                      | Non-Carcinogen                                                                      |
| Predicted Endpoint | Non-Carcinogen                                                                      | Non-Carcinogen                                                                      | Non-Carcinogen                                                                      |
| Distance           | 0.489                                                                               | 0.578                                                                               | 0.607                                                                               |
| Reference          | US FDA (Centre for Drug Eval.& Res./Off. Testing & Res.) Sept. 1997                 | US FDA (Centre for Drug Eval.& Res./Off. Testing & Res.) Sept. 1997                 | US FDA (Centre for Drug Eval.& Res./Off. Testing & Res.) Sept. 1997                 |

## Model Applicability

Unknown features are fingerprint features in the query molecule, but not found or appearing too infrequently in the training set.

1. All properties and OPS components are within expected ranges.

## Feature Contribution

### Top features for positive contribution

| Fingerprint | Bit/Smiles | Feature Structure                                                                                                                                 | Score | Carcinogen in training set |
|-------------|------------|---------------------------------------------------------------------------------------------------------------------------------------------------|-------|----------------------------|
| FCFP_6      | -146015125 | <br><chem>[*]C(=[*])C=C([c]([cH]([*]):[c]([[*]):[*] ]</chem> | 0.676 | 2 out of 2                 |

| FCFP_6                                 | 451847724  | 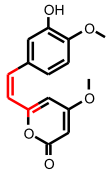<br><chem>[*]C(=CC(=[*])([*])([*]))[*]</chem>           | 0.479  | 21 out of 48               |
|----------------------------------------|------------|--------------------------------------------------------------------------------------------------------------------------------------------|--------|----------------------------|
| FCFP_6                                 | -165061478 | <br><chem>[*]C=C(\OC)/C=[*]</chem>                      | 0.46   | 1 out of 1                 |
| Top Features for negative contribution |            |                                                                                                                                            |        |                            |
| Fingerprint                            | Bit/Smiles | Feature Structure                                                                                                                          | Score  | Carcinogen in training set |
| FCFP_6                                 | 523826990  | <br><chem>[*]O[c]1:[cH]:[*]:[c]([*]):[cH]:[c]:1O</chem> | -0.423 | 0 out of 2                 |
| FCFP_6                                 | 7          | <br><chem>[*]O</chem>                                  | -0.308 | 15 out of 79               |
| FCFP_6                                 | 136627117  | <br><chem>[*]OC</chem>                                | -0.252 | 10 out of 50               |

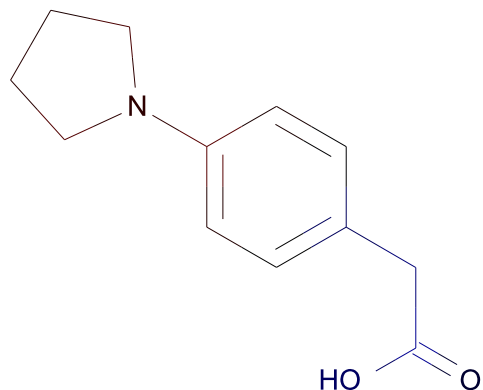

$C_{12}H_{15}NO_2$

Molecular Weight: 205.253

ALogP: 2.117

Rotatable Bonds: 3

Acceptors: 3

Donors: 1

## Model Prediction

Prediction: Non-Carcinogen

Probability: 0.239

Enrichment: 0.813

Bayesian Score: -2.79

Mahalanobis Distance: 10.5

Mahalanobis Distance p-value: 0.192

Prediction: Positive if the Bayesian score is above the estimated best cutoff value from minimizing the false positive and false negative rate.

Probability: The estimated probability that the sample is in the positive category. This assumes that the Bayesian score follows a normal distribution and is different from the prediction using a cutoff.

Enrichment: An estimate of enrichment, that is, the increased likelihood (versus random) of this sample being in the category.

Bayesian Score: The standard Laplacian-modified Bayesian score.

Mahalanobis Distance: The Mahalanobis distance (MD) is the distance to the center of the training data. The larger the MD, the less trustworthy the prediction.

Mahalanobis Distance p-value: The p-value gives the fraction of training data with an MD greater than or equal to the one for the given sample, assuming normally distributed data. The smaller the p-value, the less trustworthy the prediction. For highly non-normal X properties (e.g., fingerprints), the MD p-value is wildly inaccurate.

## Structural Similar Compounds

| Name               | Mexiletine                                                          | Methylphenidate                                                     | Eugenol                                                             |
|--------------------|---------------------------------------------------------------------|---------------------------------------------------------------------|---------------------------------------------------------------------|
| Structure          |                                                                     |                                                                     |                                                                     |
| Actual Endpoint    | Non-Carcinogen                                                      | Carcinogen                                                          | Non-Carcinogen                                                      |
| Predicted Endpoint | Non-Carcinogen                                                      | Carcinogen                                                          | Non-Carcinogen                                                      |
| Distance           | 0.522                                                               | 0.523                                                               | 0.526                                                               |
| Reference          | US FDA (Centre for Drug Eval.& Res./Off. Testing & Res.) Sept. 1997 | US FDA (Centre for Drug Eval.& Res./Off. Testing & Res.) Sept. 1997 | US FDA (Centre for Drug Eval.& Res./Off. Testing & Res.) Sept. 1997 |

## Model Applicability

Unknown features are fingerprint features in the query molecule, but not found or appearing too infrequently in the training set.

1. All properties and OPS components are within expected ranges.

## Feature Contribution

### Top features for positive contribution

| Fingerprint | Bit/Smiles  | Feature Structure                                                | Score | Carcinogen in training set |
|-------------|-------------|------------------------------------------------------------------|-------|----------------------------|
| FCFP_6      | -1033057683 | <br><chem>*[C][c]1:[cH]:[cH]:[c]([cH]:[cH]:1)N2C[*]([*)C2</chem> | 0.805 | 3 out of 3                 |

| FCFP_6                                 | -822674211 | 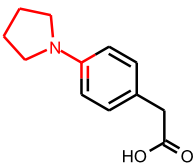<br><chem>[*]:[c](:[*])N1CCCC1</chem>                    | 0.517  | 2 out of 3                 |
|----------------------------------------|------------|---------------------------------------------------------------------------------------------------------------------------------------------|--------|----------------------------|
| FCFP_6                                 | 243588731  | <br><chem>[*]1:[cH]:[cH]:[c](:[cH]:[cH]:1)N2CCCC2</chem> | 0.46   | 1 out of 1                 |
| Top Features for negative contribution |            |                                                                                                                                             |        |                            |
| Fingerprint                            | Bit/Smiles | Feature Structure                                                                                                                           | Score  | Carcinogen in training set |
| FCFP_6                                 | -497728148 | <br><chem>[*]CC[c]1:[cH]:[cH]:[*]:[cH]:[cH]:1</chem>     | -0.96  | 2 out of 26                |
| FCFP_6                                 | -98332825  | <br><chem>[*]N1CCCC1</chem>                             | -0.793 | 1 out of 13                |
| FCFP_6                                 | 2039196715 | <br><chem>[*]:[c](:[*])CC(=O)O</chem>                  | -0.582 | 0 out of 3                 |

AND Enantiomer

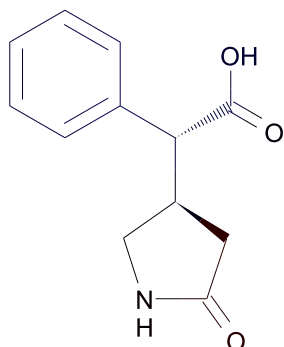C<sub>12</sub>H<sub>13</sub>NO<sub>3</sub>

Molecular Weight: 219.237

ALogP: 0.621

Rotatable Bonds: 3

Acceptors: 3

Donors: 2

## Model Prediction

Prediction: Carcinogen

Probability: 0.28

Enrichment: 0.953

Bayesian Score: -0.973

Mahalanobis Distance: 10.9

Mahalanobis Distance p-value: 0.0923

Prediction: Positive if the Bayesian score is above the estimated best cutoff value from minimizing the false positive and false negative rate.

Probability: The estimated probability that the sample is in the positive category. This assumes that the Bayesian score follows a normal distribution and is different from the prediction using a cutoff.

Enrichment: An estimate of enrichment, that is, the increased likelihood (versus random) of this sample being in the category.

Bayesian Score: The standard Laplacian-modified Bayesian score.

Mahalanobis Distance: The Mahalanobis distance (MD) is the distance to the center of the training data. The larger the MD, the less trustworthy the prediction.

Mahalanobis Distance p-value: The p-value gives the fraction of training data with an MD greater than or equal to the one for the given sample, assuming normally distributed data. The smaller the p-value, the less trustworthy the prediction. For highly non-normal X properties (e.g., fingerprints), the MD p-value is wildly inaccurate.

## Structural Similar Compounds

| Name               | Phenobarbital                                                       | Carbromal                                                           | Phenytoin                                                           |
|--------------------|---------------------------------------------------------------------|---------------------------------------------------------------------|---------------------------------------------------------------------|
| Structure          |                                                                     |                                                                     |                                                                     |
| Actual Endpoint    | Carcinogen                                                          | Non-Carcinogen                                                      | Non-Carcinogen                                                      |
| Predicted Endpoint | Carcinogen                                                          | Carcinogen                                                          | Non-Carcinogen                                                      |
| Distance           | 0.452                                                               | 0.548                                                               | 0.561                                                               |
| Reference          | US FDA (Centre for Drug Eval.& Res./Off. Testing & Res.) Sept. 1997 | US FDA (Centre for Drug Eval.& Res./Off. Testing & Res.) Sept. 1997 | US FDA (Centre for Drug Eval.& Res./Off. Testing & Res.) Sept. 1997 |

## Model Applicability

Unknown features are fingerprint features in the query molecule, but not found or appearing too infrequently in the training set.

1. All properties and OPS components are within expected ranges.

## Feature Contribution

### Top features for positive contribution

| Fingerprint | Bit/Smiles | Feature Structure                       | Score | Carcinogen in training set |
|-------------|------------|-----------------------------------------|-------|----------------------------|
| FCFP_6      | 566058135  | <p>AND Enantiomer</p> <p>O=C1C[*]N1</p> | 0.447 | 17 out of 40               |

|                                        |             |                                                                                                                                                                         |        |                            |
|----------------------------------------|-------------|-------------------------------------------------------------------------------------------------------------------------------------------------------------------------|--------|----------------------------|
| FCFP_6                                 | -1043339860 | <p>AND Enantiomer</p> 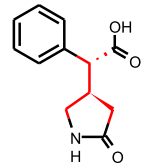 <p>[*]C([*])C1C[*][*]C1</p>                                   | 0.383  | 24 out of 61               |
| FCFP_6                                 | 1872154524  | <p>AND Enantiomer</p>  <p>[*]C(=O)[*]</p>                                            | 0.205  | 69 out of 213              |
| Top Features for negative contribution |             |                                                                                                                                                                         |        |                            |
| Fingerprint                            | Bit/Smiles  | Feature Structure                                                                                                                                                       | Score  | Carcinogen in training set |
| FCFP_6                                 | -548632217  | <p>AND Enantiomer</p>  <p>[*]C(=[*])O</p>                                            | -0.383 | 9 out of 52                |
| FCFP_6                                 | -1716639150 | <p>AND Enantiomer</p>  <p>[*]C([*])(C@@H)(C(=[*])[*])[c]1:[cH]:[cH]:[cH]:[cH]:1</p> | -0.351 | 1 out of 7                 |
| FCFP_6                                 | 7           | <p>AND Enantiomer</p>  <p>[*]O</p>                                                 | -0.308 | 15 out of 79               |

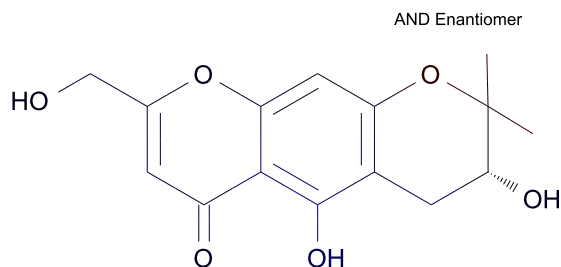C<sub>15</sub>H<sub>16</sub>O<sub>6</sub>

Molecular Weight: 292.284

ALogP: 0.901

Rotatable Bonds: 1

Acceptors: 6

Donors: 3

## Model Prediction

Prediction: Non-Carcinogen

Probability: 0.247

Enrichment: 0.839

Bayesian Score: -2.43

Mahalanobis Distance: 13.5

Mahalanobis Distance p-value: 4.52e-005

Prediction: Positive if the Bayesian score is above the estimated best cutoff value from minimizing the false positive and false negative rate.

Probability: The estimated probability that the sample is in the positive category. This assumes that the Bayesian score follows a normal distribution and is different from the prediction using a cutoff.

Enrichment: An estimate of enrichment, that is, the increased likelihood (versus random) of this sample being in the category.

Bayesian Score: The standard Laplacian-modified Bayesian score.

Mahalanobis Distance: The Mahalanobis distance (MD) is the distance to the center of the training data. The larger the MD, the less trustworthy the prediction.

Mahalanobis Distance p-value: The p-value gives the fraction of training data with an MD greater than or equal to the one for the given sample, assuming normally distributed data. The smaller the p-value, the less trustworthy the prediction. For highly non-normal X properties (e.g., fingerprints), the MD p-value is wildly inaccurate.

## Structural Similar Compounds

| Name               | Piroxicam                                                           | Sulfamethazine                                                      | Naltrexone                                                          |
|--------------------|---------------------------------------------------------------------|---------------------------------------------------------------------|---------------------------------------------------------------------|
| Structure          |                                                                     |                                                                     |                                                                     |
| Actual Endpoint    | Non-Carcinogen                                                      | Carcinogen                                                          | Non-Carcinogen                                                      |
| Predicted Endpoint | Non-Carcinogen                                                      | Carcinogen                                                          | Non-Carcinogen                                                      |
| Distance           | 0.642                                                               | 0.668                                                               | 0.679                                                               |
| Reference          | US FDA (Centre for Drug Eval.& Res./Off. Testing & Res.) Sept. 1997 | US FDA (Centre for Drug Eval.& Res./Off. Testing & Res.) Sept. 1997 | US FDA (Centre for Drug Eval.& Res./Off. Testing & Res.) Sept. 1997 |

## Model Applicability

Unknown features are fingerprint features in the query molecule, but not found or appearing too infrequently in the training set.

1. All properties and OPS components are within expected ranges.

## Feature Contribution

### Top features for positive contribution

| Fingerprint | Bit/Smiles  | Feature Structure                             | Score | Carcinogen in training set |
|-------------|-------------|-----------------------------------------------|-------|----------------------------|
| FCFP_6      | -1979984779 | <br><chem>*[C@@H]1[C@H](C(=O)O)C(=O)O1</chem> | 0.668 | 3 out of 4                 |

| FCFP_6                                 | 451847724   | 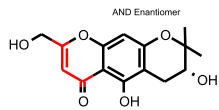 <p>AND Enantiomer</p> <chem>[*]C(=CC(=[*])[*])[*]</chem>                                 | 0.479  | 21 out of 48               |
|----------------------------------------|-------------|------------------------------------------------------------------------------------------------------------------------------------------------------------------------------|--------|----------------------------|
| FCFP_6                                 | -415216134  |  <p>AND Enantiomer</p> <chem>[*]OC(C)(C)C([*])[*]</chem>                                  | 0.306  | 5 out of 13                |
| Top Features for negative contribution |             |                                                                                                                                                                              |        |                            |
| Fingerprint                            | Bit/Smiles  | Feature Structure                                                                                                                                                            | Score  | Carcinogen in training set |
| FCFP_6                                 | -1601875224 |  <p>AND Enantiomer</p> <chem>[*]C[c]1:[c]([*]):[*]:[c]([*]):[c](C(=[*])[*]):[c]:1O</chem> | -0.582 | 0 out of 3                 |
| FCFP_6                                 | -2006448698 |  <p>AND Enantiomer</p> <chem>[*][c](:[*]):[c]1C[C@@H](O)C([*])([*])[*][c]:1[*]</chem>    | -0.582 | 0 out of 3                 |
| FCFP_6                                 | -1549192822 |  <p>AND Enantiomer</p> <chem>[*]C(=[*])C(=O)[c](:[*]):[*]</chem>                        | -0.489 | 3 out of 21                |



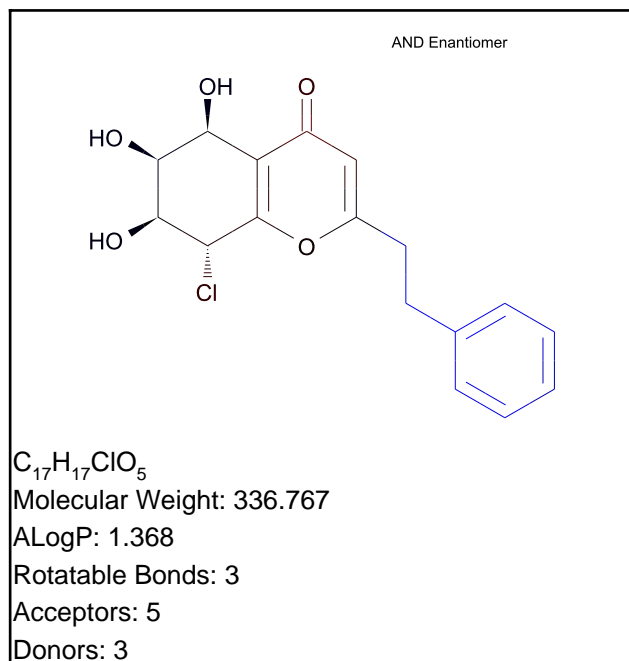

## Model Prediction

Prediction: Non-Carcinogen

Probability: 0.209

Enrichment: 0.71

Bayesian Score: -4.43

Mahalanobis Distance: 12.7

Mahalanobis Distance p-value: 0.000809

Prediction: Positive if the Bayesian score is above the estimated best cutoff value from minimizing the false positive and false negative rate.

Probability: The estimated probability that the sample is in the positive category. This assumes that the Bayesian score follows a normal distribution and is different from the prediction using a cutoff.

Enrichment: An estimate of enrichment, that is, the increased likelihood (versus random) of this sample being in the category.

Bayesian Score: The standard Laplacian-modified Bayesian score.

Mahalanobis Distance: The Mahalanobis distance (MD) is the distance to the center of the training data. The larger the MD, the less trustworthy the prediction.

Mahalanobis Distance p-value: The p-value gives the fraction of training data with an MD greater than or equal to the one for the given sample, assuming normally distributed data. The smaller the p-value, the less trustworthy the prediction. For highly non-normal X properties (e.g., fingerprints), the MD p-value is wildly inaccurate.

## Structural Similar Compounds

| Name               | Naltrexone                                                                          | Tolazamide                                                                          | Piroxicam                                                                           |
|--------------------|-------------------------------------------------------------------------------------|-------------------------------------------------------------------------------------|-------------------------------------------------------------------------------------|
| Structure          | 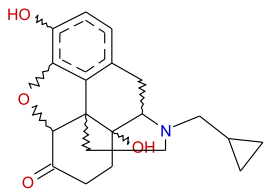 |  |  |
| Actual Endpoint    | Non-Carcinogen                                                                      | Non-Carcinogen                                                                      | Non-Carcinogen                                                                      |
| Predicted Endpoint | Non-Carcinogen                                                                      | Non-Carcinogen                                                                      | Non-Carcinogen                                                                      |
| Distance           | 0.612                                                                               | 0.626                                                                               | 0.631                                                                               |
| Reference          | US FDA (Centre for Drug Eval.& Res./Off. Testing & Res.) Sept. 1997                 | US FDA (Centre for Drug Eval.& Res./Off. Testing & Res.) Sept. 1997                 | US FDA (Centre for Drug Eval.& Res./Off. Testing & Res.) Sept. 1997                 |

## Model Applicability

Unknown features are fingerprint features in the query molecule, but not found or appearing too infrequently in the training set.

- OPS PC20 out of range. Value: 4.5013. Training min, max, SD, explained variance: -4.4914, 4.1353, 1.159, 0.0141.
- OPS PC25 out of range. Value: -3.0813. Training min, max, SD, explained variance: -3.0329, 3.839, 1.061, 0.0118.

## Feature Contribution

### Top features for positive contribution

| Fingerprint | Bit/Smiles | Feature Structure                                                                                                 | Score | Carcinogen in training set |
|-------------|------------|-------------------------------------------------------------------------------------------------------------------|-------|----------------------------|
| FCFP_6      | 71953198   | 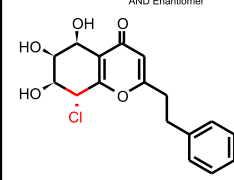<br><chem>[*]C([*])Cl</chem> | 0.612 | 12 out of 23               |

|                                        |            |                                                                                                                                                          |       |                            |
|----------------------------------------|------------|----------------------------------------------------------------------------------------------------------------------------------------------------------|-------|----------------------------|
| FCFP_6                                 | 451847724  | <p>AND Enantiomer</p> 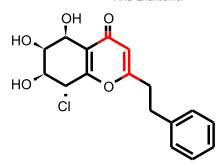 <p>[*]C(=CC(=[*])[*])[*])</p>                  | 0.479 | 21 out of 48               |
| FCFP_6                                 | 859241794  | <p>AND Enantiomer</p>  <p>[*]CC1=CC(=O)C(=[*]O1)[*]</p>               | 0.46  | 1 out of 1                 |
| Top Features for negative contribution |            |                                                                                                                                                          |       |                            |
| Fingerprint                            | Bit/Smiles | Feature Structure                                                                                                                                        | Score | Carcinogen in training set |
| FCFP_6                                 | 1981711554 | <p>AND Enantiomer</p>  <p>[*]CC[c]1:[cH]:[cH]:[cH]:[cH]:[cH]:1</p>    | -1.42 | 0 out of 12                |
| FCFP_6                                 | 1388176727 | <p>AND Enantiomer</p>  <p>[*]C(=[*])CC[c]1:[cH]:[cH]:[cH]:[cH]:1</p> | -1.21 | 0 out of 9                 |
| FCFP_6                                 | 497728148  | <p>AND Enantiomer</p>  <p>[*]CC[c]1:[cH]:[cH]:[cH]:[cH]:1</p>       | -0.96 | 2 out of 26                |

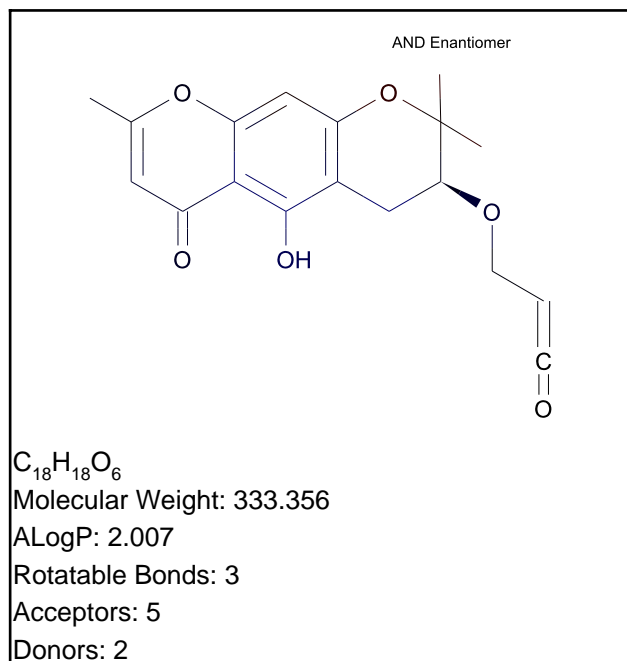

## Model Prediction

Prediction: Non-Carcinogen

Probability: 0.193

Enrichment: 0.655

Bayesian Score: -5.45

Mahalanobis Distance: 13

Mahalanobis Distance p-value: 0.000256

Prediction: Positive if the Bayesian score is above the estimated best cutoff value from minimizing the false positive and false negative rate.

Probability: The estimated probability that the sample is in the positive category. This assumes that the Bayesian score follows a normal distribution and is different from the prediction using a cutoff.

Enrichment: An estimate of enrichment, that is, the increased likelihood (versus random) of this sample being in the category.

Bayesian Score: The standard Laplacian-modified Bayesian score.

Mahalanobis Distance: The Mahalanobis distance (MD) is the distance to the center of the training data. The larger the MD, the less trustworthy the prediction.

Mahalanobis Distance p-value: The p-value gives the fraction of training data with an MD greater than or equal to the one for the given sample, assuming normally distributed data. The smaller the p-value, the less trustworthy the prediction. For highly non-normal X properties (e.g., fingerprints), the MD p-value is wildly inaccurate.

## Structural Similar Compounds

| Name               | Naltrexone                                                                          | Tolazamide                                                                          | Indapamide                                                                          |
|--------------------|-------------------------------------------------------------------------------------|-------------------------------------------------------------------------------------|-------------------------------------------------------------------------------------|
| Structure          | 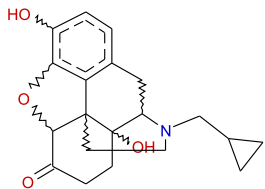 |  |  |
| Actual Endpoint    | Non-Carcinogen                                                                      | Non-Carcinogen                                                                      | Non-Carcinogen                                                                      |
| Predicted Endpoint | Non-Carcinogen                                                                      | Non-Carcinogen                                                                      | Non-Carcinogen                                                                      |
| Distance           | 0.523                                                                               | 0.554                                                                               | 0.570                                                                               |
| Reference          | US FDA (Centre for Drug Eval.& Res./Off. Testing & Res.) Sept. 1997                 | US FDA (Centre for Drug Eval.& Res./Off. Testing & Res.) Sept. 1997                 | US FDA (Centre for Drug Eval.& Res./Off. Testing & Res.) Sept. 1997                 |

## Model Applicability

Unknown features are fingerprint features in the query molecule, but not found or appearing too infrequently in the training set.

1. All properties and OPS components are within expected ranges.
2. Unknown FCFP\_2 feature: 444624378: [\*]C=C=O

## Feature Contribution

### Top features for positive contribution

| Fingerprint | Bit/Smiles | Feature Structure                                                                                                                               | Score | Carcinogen in training set |
|-------------|------------|-------------------------------------------------------------------------------------------------------------------------------------------------|-------|----------------------------|
| FCFP_6      | 1979984779 | 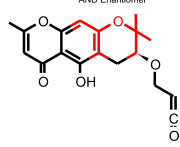<br><chem>*[C@@H]1[*][c]([*]):[c](OC1(C)C):[cH]:[*]</chem> | 0.668 | 3 out of 4                 |

| FCFP_6                                 | 451847724   | <p>AND Enantiomer</p> 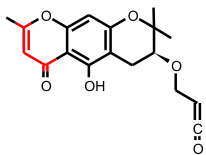 <p>[*]C(=CC(=[*])[*])[*])</p>                               | 0.479  | 21 out of 48               |
|----------------------------------------|-------------|-----------------------------------------------------------------------------------------------------------------------------------------------------------------------|--------|----------------------------|
| FCFP_6                                 | -415216134  | <p>AND Enantiomer</p>  <p>[*]OC(C)(C)C([*])[*]</p>                                 | 0.306  | 5 out of 13                |
| Top Features for negative contribution |             |                                                                                                                                                                       |        |                            |
| Fingerprint                            | Bit/Smiles  | Feature Structure                                                                                                                                                     | Score  | Carcinogen in training set |
| FCFP_6                                 | -1601875224 | <p>AND Enantiomer</p>  <p>[*]C[c]1:[c]([*]):[*]:[c]([*]):[c](C=[*])[*]):[c]:1O</p> | -0.582 | 0 out of 3                 |
| FCFP_6                                 | -1549192822 | <p>AND Enantiomer</p>  <p>[*]C(=[*])C(=O)[c]([*]):[*])</p>                       | -0.489 | 3 out of 21                |
| FCFP_6                                 | -2000646149 | <p>AND Enantiomer</p>  <p>[*]O[C@H]1C[c]([c]([*]):[*]):[c]([*])[*]C1([*])[*]</p> | -0.423 | 0 out of 2                 |

AND Enantiomer

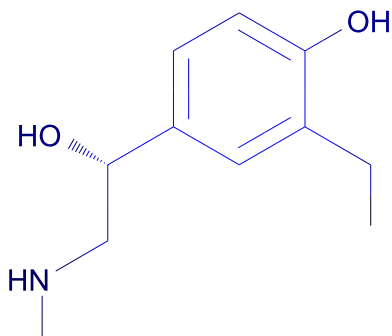C<sub>11</sub>H<sub>17</sub>NO<sub>2</sub>

Molecular Weight: 195.258

ALogP: 1.557

Rotatable Bonds: 4

Acceptors: 3

Donors: 3

## Model Prediction

Prediction: Non-Carcinogen

Probability: 0.173

Enrichment: 0.589

Bayesian Score: -6.85

Mahalanobis Distance: 8.56

Mahalanobis Distance p-value: 0.925

Prediction: Positive if the Bayesian score is above the estimated best cutoff value from minimizing the false positive and false negative rate.

Probability: The estimated probability that the sample is in the positive category. This assumes that the Bayesian score follows a normal distribution and is different from the prediction using a cutoff.

Enrichment: An estimate of enrichment, that is, the increased likelihood (versus random) of this sample being in the category.

Bayesian Score: The standard Laplacian-modified Bayesian score.

Mahalanobis Distance: The Mahalanobis distance (MD) is the distance to the center of the training data. The larger the MD, the less trustworthy the prediction.

Mahalanobis Distance p-value: The p-value gives the fraction of training data with an MD greater than or equal to the one for the given sample, assuming normally distributed data. The smaller the p-value, the less trustworthy the prediction. For highly non-normal X properties (e.g., fingerprints), the MD p-value is wildly inaccurate.

## Structural Similar Compounds

| Name               | Phenylephrine                                                       | Albuterol                                                           | Terbutaline                                                         |
|--------------------|---------------------------------------------------------------------|---------------------------------------------------------------------|---------------------------------------------------------------------|
| Structure          |                                                                     |                                                                     |                                                                     |
| Actual Endpoint    | Non-Carcinogen                                                      | Non-Carcinogen                                                      | Non-Carcinogen                                                      |
| Predicted Endpoint | Non-Carcinogen                                                      | Non-Carcinogen                                                      | Non-Carcinogen                                                      |
| Distance           | 0.376                                                               | 0.429                                                               | 0.494                                                               |
| Reference          | US FDA (Centre for Drug Eval.& Res./Off. Testing & Res.) Sept. 1997 | US FDA (Centre for Drug Eval.& Res./Off. Testing & Res.) Sept. 1997 | US FDA (Centre for Drug Eval.& Res./Off. Testing & Res.) Sept. 1997 |

## Model Applicability

Unknown features are fingerprint features in the query molecule, but not found or appearing too infrequently in the training set.

1. All properties and OPS components are within expected ranges.

## Feature Contribution

### Top features for positive contribution

| Fingerprint | Bit/Smiles | Feature Structure                       | Score | Carcinogen in training set |
|-------------|------------|-----------------------------------------|-------|----------------------------|
| FCFP_6      | 136597326  | <p>AND Enantiomer</p> <p>[*]C([*])C</p> | 0.155 | 49 out of 159              |

|                                        |            |                                                                                                                                                                         |        |                            |
|----------------------------------------|------------|-------------------------------------------------------------------------------------------------------------------------------------------------------------------------|--------|----------------------------|
| FCFP_6                                 | 0          | <p>AND Enantiomer</p> 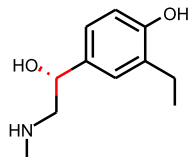 <p>[*]C([*])[*]</p>                                           | 0.114  | 90 out of 305              |
| FCFP_6                                 | 3          | <p>AND Enantiomer</p>  <p>[*]O</p>                                                   | 0.105  | 62 out of 212              |
| Top Features for negative contribution |            |                                                                                                                                                                         |        |                            |
| Fingerprint                            | Bit/Smiles | Feature Structure                                                                                                                                                       | Score  | Carcinogen in training set |
| FCFP_6                                 | -451251206 | <p>AND Enantiomer</p>  <p>[*]C[c]1:[cH]:[c](:[cH]:[*]:[c]:1[*])C([*])[*]</p>         | -0.731 | 1 out of 12                |
| FCFP_6                                 | -306804326 | <p>AND Enantiomer</p>  <p>[*]C[c]1:[cH]:[c](:[cH]:[cH]:[c]:1O)C([*])[*]</p>         | -0.582 | 0 out of 3                 |
| FCFP_6                                 | -616387365 | <p>AND Enantiomer</p>  <p>[*]C[c]1:[cH]:[c](:[cH]:[cH]:[c]:1[*])[C@@H](O)CN[*]</p> | -0.582 | 0 out of 3                 |

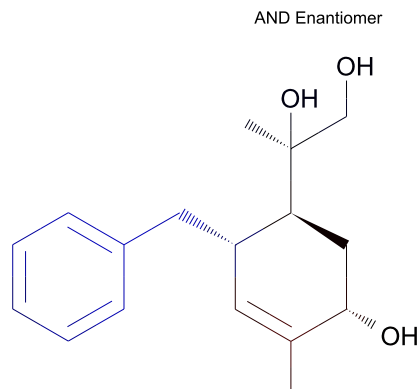
 $C_{17}H_{24}O_3$ 

Molecular Weight: 276.371

ALogP: 2.165

Rotatable Bonds: 4

Acceptors: 3

Donors: 3

## Model Prediction

Prediction: Non-Carcinogen

Probability: 0.237

Enrichment: 0.806

Bayesian Score: -2.9

Mahalanobis Distance: 12.5

Mahalanobis Distance p-value: 0.00166

Prediction: Positive if the Bayesian score is above the estimated best cutoff value from minimizing the false positive and false negative rate.

Probability: The estimated probability that the sample is in the positive category. This assumes that the Bayesian score follows a normal distribution and is different from the prediction using a cutoff.

Enrichment: An estimate of enrichment, that is, the increased likelihood (versus random) of this sample being in the category.

Bayesian Score: The standard Laplacian-modified Bayesian score.

Mahalanobis Distance: The Mahalanobis distance (MD) is the distance to the center of the training data. The larger the MD, the less trustworthy the prediction.

Mahalanobis Distance p-value: The p-value gives the fraction of training data with an MD greater than or equal to the one for the given sample, assuming normally distributed data. The smaller the p-value, the less trustworthy the prediction. For highly non-normal X properties (e.g., fingerprints), the MD p-value is wildly inaccurate.

## Structural Similar Compounds

| Name               | Pindolol                                                            | Carteolol                                                           | Procarbazine                                                        |
|--------------------|---------------------------------------------------------------------|---------------------------------------------------------------------|---------------------------------------------------------------------|
| Structure          |                                                                     |                                                                     |                                                                     |
| Actual Endpoint    | Non-Carcinogen                                                      | Non-Carcinogen                                                      | Carcinogen                                                          |
| Predicted Endpoint | Non-Carcinogen                                                      | Non-Carcinogen                                                      | Carcinogen                                                          |
| Distance           | 0.576                                                               | 0.590                                                               | 0.609                                                               |
| Reference          | US FDA (Centre for Drug Eval.& Res./Off. Testing & Res.) Sept. 1997 | US FDA (Centre for Drug Eval.& Res./Off. Testing & Res.) Sept. 1997 | US FDA (Centre for Drug Eval.& Res./Off. Testing & Res.) Sept. 1997 |

## Model Applicability

Unknown features are fingerprint features in the query molecule, but not found or appearing too infrequently in the training set.

1. All properties and OPS components are within expected ranges.

## Feature Contribution

### Top features for positive contribution

| Fingerprint | Bit/Smiles | Feature Structure                                  | Score | Carcinogen in training set |
|-------------|------------|----------------------------------------------------|-------|----------------------------|
| FCFP_6      | 451847724  | <p>AND Enantiomer</p> <p>[*]C(=CC(=[*])[*])[*]</p> | 0.479 | 21 out of 48               |

|                                        |             |                                                                                                                                                                   |        |                            |
|----------------------------------------|-------------|-------------------------------------------------------------------------------------------------------------------------------------------------------------------|--------|----------------------------|
| FCFP_6                                 | -1043339860 | <p>AND Enantiomer</p> 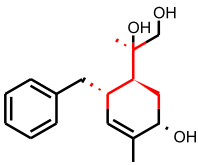 <p>[*]C([*])C1C[*][*]C1</p>                             | 0.383  | 24 out of 61               |
| FCFP_6                                 | 1000913921  | <p>AND Enantiomer</p>  <p>[*]C[C@@H]1C=C(C)[C@@H]1[*]<br/>[*][*][*]C@H1[*]</p> | 0.38   | 2 out of 4                 |
| Top Features for negative contribution |             |                                                                                                                                                                   |        |                            |
| Fingerprint                            | Bit/Smiles  | Feature Structure                                                                                                                                                 | Score  | Carcinogen in training set |
| FCFP_6                                 | 1981711554  | <p>AND Enantiomer</p>  <p>[*]CC[c]1:[cH]:[cH]:[cH]:[cH]:[cH]:1</p>             | -1.42  | 0 out of 12                |
| FCFP_6                                 | -497728148  | <p>AND Enantiomer</p>  <p>[*]CC[c]1:[cH]:[cH]:[cH]:[cH]:[cH]:1</p>            | -0.96  | 2 out of 26                |
| FCFP_6                                 | 907007053   | <p>AND Enantiomer</p>  <p>[*]CC[c]([*]):[*]</p>                              | -0.366 | 11 out of 62               |



# Simeprevir

# TOPKAT\_Mouse\_Male\_FDA\_None\_vs\_Carcinogen

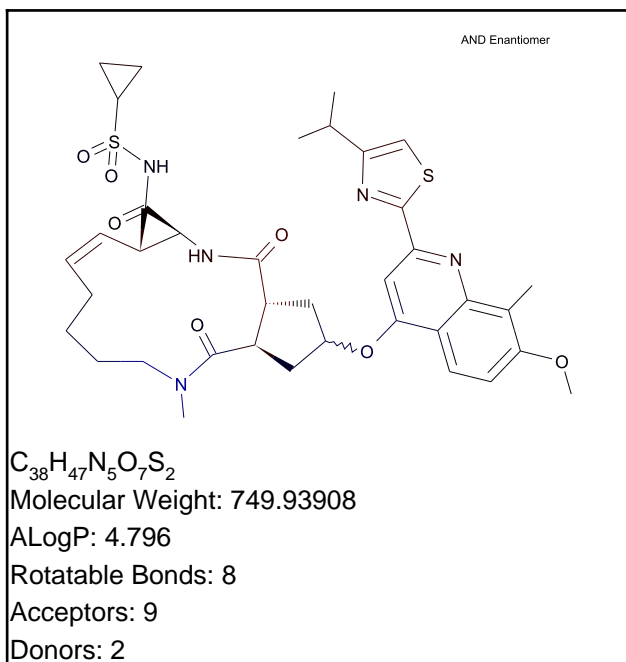

## Model Prediction

Prediction: Non-Carcinogen

Probability: 0.258

Enrichment: 0.877

Bayesian Score: -1.92

Mahalanobis Distance: 18.3

Mahalanobis Distance p-value: 6.22e-015

Prediction: Positive if the Bayesian score is above the estimated best cutoff value from minimizing the false positive and false negative rate.

Probability: The estimated probability that the sample is in the positive category. This assumes that the Bayesian score follows a normal distribution and is different from the prediction using a cutoff.

Enrichment: An estimate of enrichment, that is, the increased likelihood (versus random) of this sample being in the category.

Bayesian Score: The standard Laplacian-modified Bayesian score.

Mahalanobis Distance: The Mahalanobis distance (MD) is the distance to the center of the training data. The larger the MD, the less trustworthy the prediction.

Mahalanobis Distance p-value: The p-value gives the fraction of training data with an MD greater than or equal to the one for the given sample, assuming normally distributed data. The smaller the p-value, the less trustworthy the prediction. For highly non-normal X properties (e.g., fingerprints), the MD p-value is wildly inaccurate.

## Structural Similar Compounds

| Name               | Reserpine                                                                           | Bromocriptine                                                                       | Itraconazole                                                                        |
|--------------------|-------------------------------------------------------------------------------------|-------------------------------------------------------------------------------------|-------------------------------------------------------------------------------------|
| Structure          | 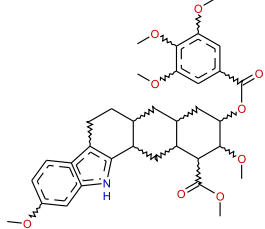 |  |  |
| Actual Endpoint    | Carcinogen                                                                          | Non-Carcinogen                                                                      | Non-Carcinogen                                                                      |
| Predicted Endpoint | Carcinogen                                                                          | Non-Carcinogen                                                                      | Non-Carcinogen                                                                      |
| Distance           | 0.775                                                                               | 0.832                                                                               | 0.865                                                                               |
| Reference          | US FDA (Centre for Drug Eval.& Res./Off. Testing & Res.) Sept. 1997                 | US FDA (Centre for Drug Eval.& Res./Off. Testing & Res.) Sept. 1997                 | US FDA (Centre for Drug Eval.& Res./Off. Testing & Res.) Sept. 1997                 |

## Model Applicability

Unknown features are fingerprint features in the query molecule, but not found or appearing too infrequently in the training set.

- All properties and OPS components are within expected ranges.
- Unknown FCFP\_2 feature: 690481386: [\*]:[c](:[\*])[c]1:n:[\*]:[\*]:s:1

## Feature Contribution

### Top features for positive contribution

| Fingerprint | Bit/Smiles | Feature Structure                                                                                              | Score | Carcinogen in training set |
|-------------|------------|----------------------------------------------------------------------------------------------------------------|-------|----------------------------|
| FCFP_6      | -55265897  | 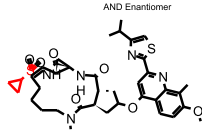<br>[*]S(=[*])(=[*])C1CC1 | 0.594 | 17 out of 34               |

|                                        |             |                                                                                                                                                             |        |                            |
|----------------------------------------|-------------|-------------------------------------------------------------------------------------------------------------------------------------------------------------|--------|----------------------------|
| FCFP_6                                 | -1289661876 | <p>AND Enantiomer</p> 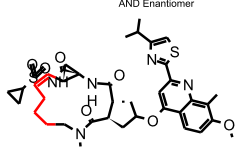 <p>[*]CCC\C=C/[*]</p>                             | 0.517  | 2 out of 3                 |
| FCFP_6                                 | 451847724   | <p>AND Enantiomer</p>  <p>[*]C(=CC(=[*])[*])[*]</p>                      | 0.479  | 21 out of 48               |
| Top Features for negative contribution |             |                                                                                                                                                             |        |                            |
| Fingerprint                            | Bit/Smiles  | Feature Structure                                                                                                                                           | Score  | Carcinogen in training set |
| FCFP_6                                 | -98332825   | <p>AND Enantiomer</p>  <p>[*]N1CCCC1</p>                                 | -0.793 | 1 out of 13                |
| FCFP_6                                 | -1972798083 | <p>AND Enantiomer</p>  <p>[*]:[cH]:[c](OC1C[*][*]C1):[c](:[*]):[*]</p> | -0.582 | 0 out of 3                 |
| FCFP_6                                 | -1553874037 | <p>AND Enantiomer</p>  <p>[*]CN(C)C(=[*])[*]</p>                       | -0.45  | 5 out of 32                |

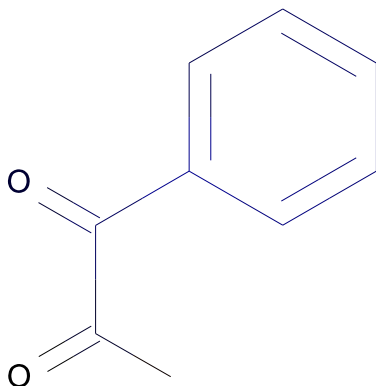C<sub>9</sub>H<sub>8</sub>O<sub>2</sub>

Molecular Weight: 148.159

ALogP: 1.446

Rotatable Bonds: 2

Acceptors: 2

Donors: 0

## Model Prediction

Prediction: Multiple-Carcinogen

Probability: 0.175

Enrichment: 0.581

Bayesian Score: -4.25

Mahalanobis Distance: 7.52

Mahalanobis Distance p-value: 0.418

Prediction: Positive if the Bayesian score is above the estimated best cutoff value from minimizing the false positive and false negative rate.

Probability: The estimated probability that the sample is in the positive category. This assumes that the Bayesian score follows a normal distribution and is different from the prediction using a cutoff.

Enrichment: An estimate of enrichment, that is, the increased likelihood (versus random) of this sample being in the category.

Bayesian Score: The standard Laplacian-modified Bayesian score.

Mahalanobis Distance: The Mahalanobis distance (MD) is the distance to the center of the training data. The larger the MD, the less trustworthy the prediction.

Mahalanobis Distance p-value: The p-value gives the fraction of training data with an MD greater than or equal to the one for the given sample, assuming normally distributed data. The smaller the p-value, the less trustworthy the prediction. For highly non-normal X properties (e.g., fingerprints), the MD p-value is wildly inaccurate.

## Structural Similar Compounds

| Name               | Coumarin                                                            | Toluidine; o-                                                       | Phenacetin                                                          |
|--------------------|---------------------------------------------------------------------|---------------------------------------------------------------------|---------------------------------------------------------------------|
| Structure          |                                                                     |                                                                     |                                                                     |
| Actual Endpoint    | Single-Carcinogen                                                   | Single-Carcinogen                                                   | Single-Carcinogen                                                   |
| Predicted Endpoint | Single-Carcinogen                                                   | Single-Carcinogen                                                   | Single-Carcinogen                                                   |
| Distance           | 0.528                                                               | 0.637                                                               | 0.642                                                               |
| Reference          | US FDA (Centre for Drug Eval.& Res./Off. Testing & Res.) Sept. 1997 | US FDA (Centre for Drug Eval.& Res./Off. Testing & Res.) Sept. 1997 | US FDA (Centre for Drug Eval.& Res./Off. Testing & Res.) Sept. 1997 |

## Model Applicability

Unknown features are fingerprint features in the query molecule, but not found or appearing too infrequently in the training set.

1. All properties and OPS components are within expected ranges.

## Feature Contribution

### Top features for positive contribution

| Fingerprint | Bit/Smiles | Feature Structure                 | Score | Multiple-Carcinogen in training set |
|-------------|------------|-----------------------------------|-------|-------------------------------------|
| FCFP_12     | 565968762  | <br><chem>[*]C(=[*])C(=O)C</chem> | 0.168 | 3 out of 7                          |

|                                        |             |                                                                                                                                            |        |                                     |
|----------------------------------------|-------------|--------------------------------------------------------------------------------------------------------------------------------------------|--------|-------------------------------------|
| FCFP_12                                | 136597326   | 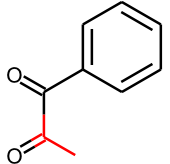<br><chem>[*]C(=[*])C</chem>                            | 0.0722 | 18 out of 49                        |
| Top Features for negative contribution |             |                                                                                                                                            |        |                                     |
| Fingerprint                            | Bit/Smiles  | Feature Structure                                                                                                                          | Score  | Multiple-Carcinogen in training set |
| FCFP_12                                | -1549192822 | <br><chem>[*]C(=[*])C(=O)[c]([*])[*]</chem>             | -0.704 | 0 out of 3                          |
| FCFP_12                                | 991735244   | <br><chem>[*][c]1:[*]:[cH]:[cH]:[cH]:[cH]:1</chem>      | -0.562 | 5 out of 28                         |
| FCFP_12                                | -1698724694 | <br><chem>[*]C(=[*])[c]1:[cH]:[cH]:[cH]:[cH]:1</chem> | -0.423 | 3 out of 15                         |

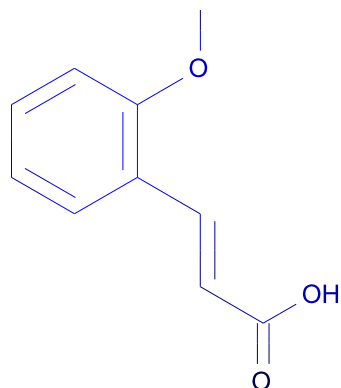C<sub>10</sub>H<sub>10</sub>O<sub>3</sub>

Molecular Weight: 178.185

ALogP: 1.911

Rotatable Bonds: 3

Acceptors: 3

Donors: 1

## Model Prediction

Prediction: Single-Carcinogen

Probability: 0.148

Enrichment: 0.491

Bayesian Score: -10.9

Mahalanobis Distance: 9.52

Mahalanobis Distance p-value: 0.0383

Prediction: Positive if the Bayesian score is above the estimated best cutoff value from minimizing the false positive and false negative rate.

Probability: The estimated probability that the sample is in the positive category. This assumes that the Bayesian score follows a normal distribution and is different from the prediction using a cutoff.

Enrichment: An estimate of enrichment, that is, the increased likelihood (versus random) of this sample being in the category.

Bayesian Score: The standard Laplacian-modified Bayesian score.

Mahalanobis Distance: The Mahalanobis distance (MD) is the distance to the center of the training data. The larger the MD, the less trustworthy the prediction.

Mahalanobis Distance p-value: The p-value gives the fraction of training data with an MD greater than or equal to the one for the given sample, assuming normally distributed data. The smaller the p-value, the less trustworthy the prediction. For highly non-normal X properties (e.g., fingerprints), the MD p-value is wildly inaccurate.

## Structural Similar Compounds

| Name               | Coumarin                                                            | Phenacetin                                                          | Methylphenidate                                                     |
|--------------------|---------------------------------------------------------------------|---------------------------------------------------------------------|---------------------------------------------------------------------|
| Structure          |                                                                     |                                                                     |                                                                     |
| Actual Endpoint    | Single-Carcinogen                                                   | Single-Carcinogen                                                   | Single-Carcinogen                                                   |
| Predicted Endpoint | Single-Carcinogen                                                   | Single-Carcinogen                                                   | Single-Carcinogen                                                   |
| Distance           | 0.548                                                               | 0.559                                                               | 0.580                                                               |
| Reference          | US FDA (Centre for Drug Eval.& Res./Off. Testing & Res.) Sept. 1997 | US FDA (Centre for Drug Eval.& Res./Off. Testing & Res.) Sept. 1997 | US FDA (Centre for Drug Eval.& Res./Off. Testing & Res.) Sept. 1997 |

## Model Applicability

Unknown features are fingerprint features in the query molecule, but not found or appearing too infrequently in the training set.

1. OPS PC8 out of range. Value: 4.4612. Training min, max, SD, explained variance: -3.6394, 4.2146, 1.519, 0.0430.

## Feature Contribution

### Top features for positive contribution

| Fingerprint | Bit/Smiles | Feature Structure              | Score | Multiple-Carcinogen in training set |
|-------------|------------|--------------------------------|-------|-------------------------------------|
| FCFP_12     | 451847724  | <br><chem>[*]C=C\C(=O)O</chem> | 0.3   | 10 out of 21                        |

|                                        |             |                                                                                                                                            |       |                                     |
|----------------------------------------|-------------|--------------------------------------------------------------------------------------------------------------------------------------------|-------|-------------------------------------|
| FCFP_12                                | -1977641857 | 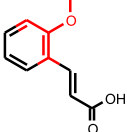<br><chem>[*][c](:[*]):[c](OC):[cH]:[*]</chem>          | 0.105 | 2 out of 5                          |
| Top Features for negative contribution |             |                                                                                                                                            |       |                                     |
| Fingerprint                            | Bit/Smiles  | Feature Structure                                                                                                                          | Score | Multiple-Carcinogen in training set |
| FCFP_12                                | -548632217  | <br><chem>[*]C(=[*])O</chem>                            | -1.4  | 0 out of 9                          |
| FCFP_12                                | -1176841573 | <br><chem>[*]=CC(=O)O</chem>                            | -1.31 | 0 out of 8                          |
| FCFP_12                                | -1099193755 | <br><chem>[*]=C[c]1:[cH]:[*]:[cH]:[cH]:[c]:1OC</chem> | -1.11 | 0 out of 6                          |

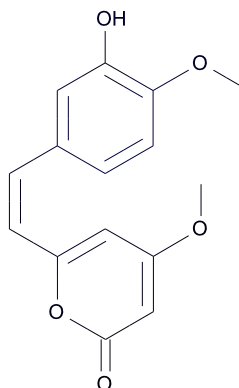C<sub>15</sub>H<sub>14</sub>O<sub>5</sub>

Molecular Weight: 274.269

ALogP: 1.969

Rotatable Bonds: 4

Acceptors: 5

Donors: 1

## Model Prediction

Prediction: Single-Carcinogen

Probability: 0.157

Enrichment: 0.521

Bayesian Score: -6.14

Mahalanobis Distance: 11.2

Mahalanobis Distance p-value: 0.0024

Prediction: Positive if the Bayesian score is above the estimated best cutoff value from minimizing the false positive and false negative rate.

Probability: The estimated probability that the sample is in the positive category. This assumes that the Bayesian score follows a normal distribution and is different from the prediction using a cutoff.

Enrichment: An estimate of enrichment, that is, the increased likelihood (versus random) of this sample being in the category.

Bayesian Score: The standard Laplacian-modified Bayesian score.

Mahalanobis Distance: The Mahalanobis distance (MD) is the distance to the center of the training data. The larger the MD, the less trustworthy the prediction.

Mahalanobis Distance p-value: The p-value gives the fraction of training data with an MD greater than or equal to the one for the given sample, assuming normally distributed data. The smaller the p-value, the less trustworthy the prediction. For highly non-normal X properties (e.g., fingerprints), the MD p-value is wildly inaccurate.

## Structural Similar Compounds

| Name               | Nitroacetophenetide                                                 | Methylphenidate                                                     | Tramadol                                                            |
|--------------------|---------------------------------------------------------------------|---------------------------------------------------------------------|---------------------------------------------------------------------|
| Structure          |                                                                     |                                                                     |                                                                     |
| Actual Endpoint    | Single-Carcinogen                                                   | Single-Carcinogen                                                   | Single-Carcinogen                                                   |
| Predicted Endpoint | Single-Carcinogen                                                   | Single-Carcinogen                                                   | Single-Carcinogen                                                   |
| Distance           | 0.660                                                               | 0.681                                                               | 0.705                                                               |
| Reference          | US FDA (Centre for Drug Eval.& Res./Off. Testing & Res.) Sept. 1997 | US FDA (Centre for Drug Eval.& Res./Off. Testing & Res.) Sept. 1997 | US FDA (Centre for Drug Eval.& Res./Off. Testing & Res.) Sept. 1997 |

## Model Applicability

Unknown features are fingerprint features in the query molecule, but not found or appearing too infrequently in the training set.

1. All properties and OPS components are within expected ranges.

## Feature Contribution

### Top features for positive contribution

| Fingerprint | Bit/Smiles | Feature Structure                   | Score | Multiple-Carcinogen in training set |
|-------------|------------|-------------------------------------|-------|-------------------------------------|
| FCFP_12     | 451847724  | <br><chem>[*]C=C(C(=[*])[*])</chem> | 0.3   | 10 out of 21                        |

|                                        |            |                                                                                                                                              |        |                                     |
|----------------------------------------|------------|----------------------------------------------------------------------------------------------------------------------------------------------|--------|-------------------------------------|
| FCFP_12                                | 565998553  | 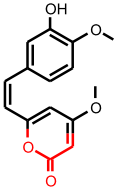<br><chem>[*]OC(=O)C=[*]</chem>                           | 0.194  | 6 out of 14                         |
| FCFP_12                                | 949015626  | <br><chem>[*][c]1:[*]:[cH]:[c](C=[*]):[cH]:[c]:1O</chem>  | 0.174  | 1 out of 2                          |
| Top Features for negative contribution |            |                                                                                                                                              |        |                                     |
| Fingerprint                            | Bit/Smiles | Feature Structure                                                                                                                            | Score  | Multiple-Carcinogen in training set |
| FCFP_12                                | 7          | <br><chem>[*]O</chem>                                     | -0.71  | 2 out of 15                         |
| FCFP_12                                | 146015125  | <br><chem>[*]C(=[*])C=C[c]([cH]:[*])[c]([*]):[*]</chem> | -0.519 | 0 out of 2                          |
| FCFP_12                                | 1618154665 | <br><chem>[*]:[cH]:[cH]:[cH]:[*]</chem>                 | -0.409 | 13 out of 59                        |





AND Enantiomer

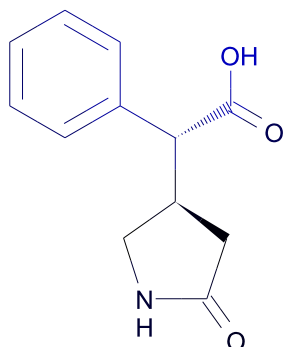C<sub>12</sub>H<sub>13</sub>NO<sub>3</sub>

Molecular Weight: 219.237

ALogP: 0.621

Rotatable Bonds: 3

Acceptors: 3

Donors: 2

## Model Prediction

Prediction: Single-Carcinogen

Probability: 0.146

Enrichment: 0.484

Bayesian Score: -9.75

Mahalanobis Distance: 12.5

Mahalanobis Distance p-value: 0.00023

Prediction: Positive if the Bayesian score is above the estimated best cutoff value from minimizing the false positive and false negative rate.

Probability: The estimated probability that the sample is in the positive category. This assumes that the Bayesian score follows a normal distribution and is different from the prediction using a cutoff.

Enrichment: An estimate of enrichment, that is, the increased likelihood (versus random) of this sample being in the category.

Bayesian Score: The standard Laplacian-modified Bayesian score.

Mahalanobis Distance: The Mahalanobis distance (MD) is the distance to the center of the training data. The larger the MD, the less trustworthy the prediction.

Mahalanobis Distance p-value: The p-value gives the fraction of training data with an MD greater than or equal to the one for the given sample, assuming normally distributed data. The smaller the p-value, the less trustworthy the prediction. For highly non-normal X properties (e.g., fingerprints), the MD p-value is wildly inaccurate.

## Structural Similar Compounds

| Name               | Phenobarbital                                                       | Acetaminophen                                                       | Tranexamic acid                                                     |
|--------------------|---------------------------------------------------------------------|---------------------------------------------------------------------|---------------------------------------------------------------------|
| Structure          |                                                                     |                                                                     |                                                                     |
| Actual Endpoint    | Multiple-Carcinogen                                                 | Single-Carcinogen                                                   | Single-Carcinogen                                                   |
| Predicted Endpoint | Multiple-Carcinogen                                                 | Single-Carcinogen                                                   | Single-Carcinogen                                                   |
| Distance           | 0.469                                                               | 0.633                                                               | 0.644                                                               |
| Reference          | US FDA (Centre for Drug Eval.& Res./Off. Testing & Res.) Sept. 1997 | US FDA (Centre for Drug Eval.& Res./Off. Testing & Res.) Sept. 1997 | US FDA (Centre for Drug Eval.& Res./Off. Testing & Res.) Sept. 1997 |

## Model Applicability

Unknown features are fingerprint features in the query molecule, but not found or appearing too infrequently in the training set.

- OPS PC5 out of range. Value: -3.5894. Training min, max, SD, explained variance: -3.5268, 3.8048, 1.733, 0.0560.

## Feature Contribution

### Top features for positive contribution

| Fingerprint | Bit/Smiles | Feature Structure                           | Score | Multiple-Carcinogen in training set |
|-------------|------------|---------------------------------------------|-------|-------------------------------------|
| FCFP_12     | 1186303932 | <br><chem>[*]C([*])C@H(C(=O)N)C(=O)N</chem> | 0.497 | 4 out of 6                          |

|                                        |             |                                                                                                                                                    |       |                                     |
|----------------------------------------|-------------|----------------------------------------------------------------------------------------------------------------------------------------------------|-------|-------------------------------------|
| FCFP_12                                | -1043339860 | <p>AND Enantiomer</p> 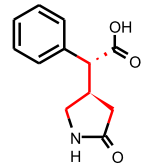 <p><chem>[*]C([*])C1C[*][*]C1</chem></p> | 0.349 | 12 out of 24                        |
| Top Features for negative contribution |             |                                                                                                                                                    |       |                                     |
| Fingerprint                            | Bit/Smiles  | Feature Structure                                                                                                                                  | Score | Multiple-Carcinogen in training set |
| FCFP_12                                | -548632217  | <p>AND Enantiomer</p>  <p><chem>[*]C(=[*])O</chem></p>          | -1.4  | 0 out of 9                          |
| FCFP_12                                | -1176841573 | <p>AND Enantiomer</p>  <p><chem>[*]=CC(=O)O</chem></p>          | -1.31 | 0 out of 8                          |
| FCFP_12                                | 7           | <p>AND Enantiomer</p>  <p><chem>[*]O</chem></p>               | -0.71 | 2 out of 15                         |

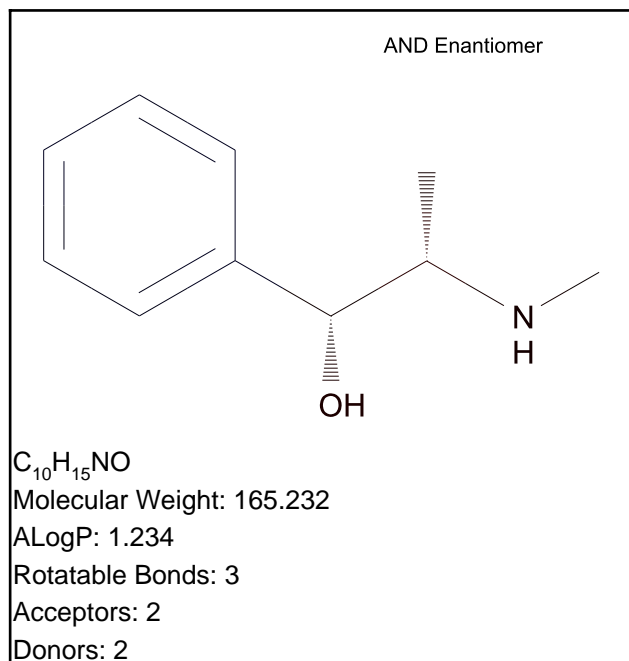

### Model Prediction

Prediction: **Moderate\_Severe**

Probability: 0.827

Enrichment: 1.2

Bayesian Score: 0.297

Mahalanobis Distance: 8.03

Mahalanobis Distance p-value: 0.917

Prediction: Positive if the Bayesian score is above the estimated best cutoff value from minimizing the false positive and false negative rate.

Probability: The estimated probability that the sample is in the positive category. This assumes that the Bayesian score follows a normal distribution and is different from the prediction using a cutoff.

Enrichment: An estimate of enrichment, that is, the increased likelihood (versus random) of this sample being in the category.

Bayesian Score: The standard Laplacian-modified Bayesian score.

Mahalanobis Distance: The Mahalanobis distance (MD) is the distance to the center of the training data. The larger the MD, the less trustworthy the prediction.

Mahalanobis Distance p-value: The p-value gives the fraction of training data with an MD greater than or equal to the one for the given sample, assuming normally distributed data. The smaller the p-value, the less trustworthy the prediction. For highly non-normal X properties (e.g., fingerprints), the MD p-value is wildly inaccurate.

### Structural Similar Compounds

| Name               | ETHANOL;2-(PHENETHYLAMINO)-                                                         | O-TOLUIDINO-ETHANOL                                                                 | Ethanol; 2-anilino-                                                                 |
|--------------------|-------------------------------------------------------------------------------------|-------------------------------------------------------------------------------------|-------------------------------------------------------------------------------------|
| Structure          | 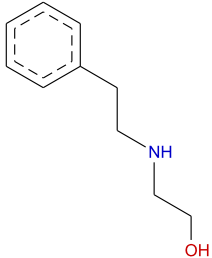 |  |  |
| Actual Endpoint    | Moderate_Severe                                                                     | Moderate_Severe                                                                     | Moderate_Severe                                                                     |
| Predicted Endpoint | Moderate_Severe                                                                     | Moderate_Severe                                                                     | Mild                                                                                |
| Distance           | 0.430                                                                               | 0.439                                                                               | 0.486                                                                               |
| Reference          | AMIHBC 10;61;54                                                                     | JIHTAB 31;60;49                                                                     | Prehled Prumyslove Toxikologie; Organicke Latky; Marhold; J. -;691;86               |

### Model Applicability

Unknown features are fingerprint features in the query molecule, but not found or appearing too infrequently in the training set.

1. All properties and OPS components are within expected ranges.

### Feature Contribution

| Top features for positive contribution |            |                                                                                                                                |       |                                 |
|----------------------------------------|------------|--------------------------------------------------------------------------------------------------------------------------------|-------|---------------------------------|
| Fingerprint                            | Bit/Smiles | Feature Structure                                                                                                              | Score | Moderate_Severe in training set |
| FCFP_10                                | -885550502 | <p>AND Enantiomer</p> 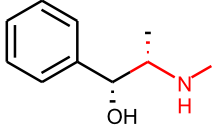 <p>[*]C([*])NC</p> | 0.239 | 54 out of 64                    |

|                                        |             |                                                                                                                                                                |        |                                    |
|----------------------------------------|-------------|----------------------------------------------------------------------------------------------------------------------------------------------------------------|--------|------------------------------------|
| FCFP_10                                | 1070061035  | <p>AND Enantiomer</p> 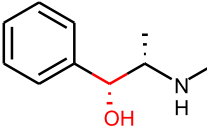 <p>[*]C([*])O</p>                                    | 0.239  | 284 out of 338                     |
| FCFP_10                                | -1043250487 | <p>AND Enantiomer</p>  <p>[*]N[C@@H](C)C([*])O</p>                          | 0.22   | 62 out of 75                       |
| Top Features for negative contribution |             |                                                                                                                                                                |        |                                    |
| Fingerprint                            | Bit/Smiles  | Feature Structure                                                                                                                                              | Score  | Moderate_Severe<br>in training set |
| FCFP_10                                | -1698724694 | <p>AND Enantiomer</p>  <p>[*]C([*])[c]1:[cH]:[cH]:[cH]:[cH]:[cH]:[cH]:1</p> | -0.284 | 53 out of 107                      |
| FCFP_10                                | 136686699   | <p>AND Enantiomer</p>  <p>[*]NC</p>                                       | -0.243 | 6 out of 12                        |
| FCFP_10                                | 991735244   | <p>AND Enantiomer</p>  <p>[*][c]1:[*]:[cH]:[cH]:[cH]:[cH]:[cH]:1</p>      | -0.185 | 130 out of 237                     |

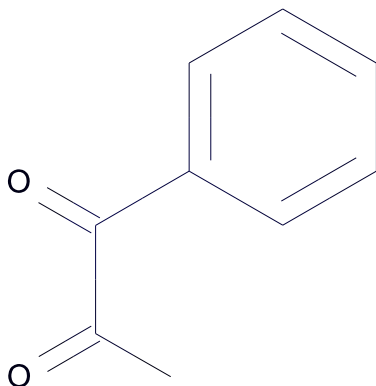C<sub>9</sub>H<sub>8</sub>O<sub>2</sub>

Molecular Weight: 148.159

ALogP: 1.446

Rotatable Bonds: 2

Acceptors: 2

Donors: 0

## Model Prediction

Prediction: Mild

Probability: 0.781

Enrichment: 1.13

Bayesian Score: -1.64

Mahalanobis Distance: 6.22

Mahalanobis Distance p-value: 1

Prediction: Positive if the Bayesian score is above the estimated best cutoff value from minimizing the false positive and false negative rate.

Probability: The estimated probability that the sample is in the positive category. This assumes that the Bayesian score follows a normal distribution and is different from the prediction using a cutoff.

Enrichment: An estimate of enrichment, that is, the increased likelihood (versus random) of this sample being in the category.

Bayesian Score: The standard Laplacian-modified Bayesian score.

Mahalanobis Distance: The Mahalanobis distance (MD) is the distance to the center of the training data. The larger the MD, the less trustworthy the prediction.

Mahalanobis Distance p-value: The p-value gives the fraction of training data with an MD greater than or equal to the one for the given sample, assuming normally distributed data. The smaller the p-value, the less trustworthy the prediction. For highly non-normal X properties (e.g., fingerprints), the MD p-value is wildly inaccurate.

## Structural Similar Compounds

| Name               | ACETOPHENONE      | METHYL BENZOATE | Propiophenone                                                         |
|--------------------|-------------------|-----------------|-----------------------------------------------------------------------|
| Structure          |                   |                 |                                                                       |
| Actual Endpoint    | Moderate_Severe   | Mild            | Mild                                                                  |
| Predicted Endpoint | Mild              | Mild            | Mild                                                                  |
| Distance           | 0.312             | 0.382           | 0.394                                                                 |
| Reference          | AJOPAA 29;1363;46 | AMIHBC 10;61;54 | Prehled Prumyslove Toxikologie; Organicke Latky; Marhold; J. -;291;86 |

## Model Applicability

Unknown features are fingerprint features in the query molecule, but not found or appearing too infrequently in the training set.

1. All properties and OPS components are within expected ranges.

## Feature Contribution

### Top Features for negative contribution

| Fingerprint | Bit/Smiles | Feature Structure    | Score  | Moderate_Severe in training set |
|-------------|------------|----------------------|--------|---------------------------------|
| FCFP_10     | 565968762  | <br>[*]C(=[*])C(=O)C | -0.372 | 17 out of 38                    |

|         |             |                                                                                                                                                    |        |               |
|---------|-------------|----------------------------------------------------------------------------------------------------------------------------------------------------|--------|---------------|
| FCFP_10 | -1698724694 | 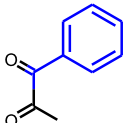<br><chem>[*]C([*])[c]1:[cH]:[cH]:[cH]:[cH]:[cH]:1</chem>       | -0.284 | 53 out of 107 |
| FCFP_10 | 975909016   | <br><chem>[*]C(=[*])C(=O)[c]1:[cH]:[cH]:[cH]:[cH]:[cH]:1</chem> | -0.216 | 3 out of 6    |

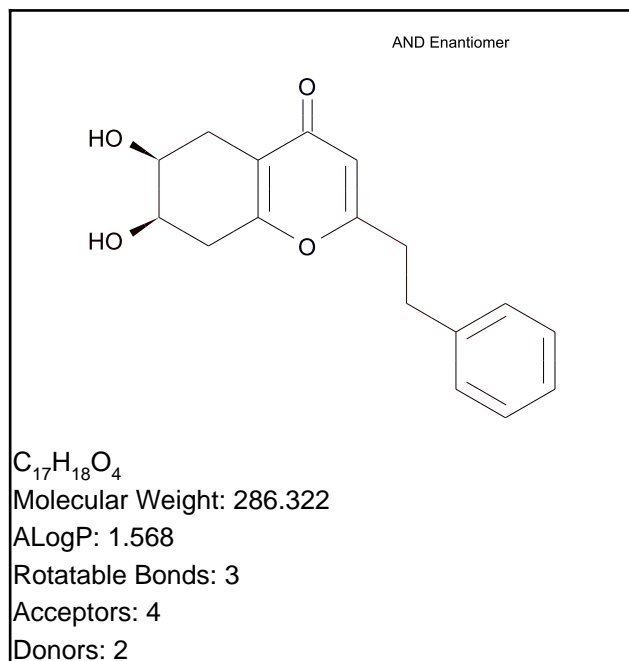

## Model Prediction

**Prediction: Moderate Severe**

Probability: 0.829

Enrichment: 1.2

Bayesian Score: 0.444

Mahalanobis Distance: 10.7

Mahalanobis Distance p-value: 0.0129

Prediction: Positive if the Bayesian score is above the estimated best cutoff value from minimizing the false positive and false negative rate.

Probability: The estimated probability that the sample is in the positive category. This assumes that the Bayesian score follows a normal distribution and is different from the prediction using a cutoff.

Enrichment: An estimate of enrichment, that is, the increased likelihood (versus random) of this sample being in the category.  
Bayesian Score: The standard Laplacian-modified Bayesian score.

**Mahalanobis Distance:** The Mahalanobis distance (MD) is the distance to the center of the training data. The larger the MD, the less trustworthy the prediction.

Mahalanobis Distance p-value: The p-value gives the fraction of training data with an MD greater than or equal to the one for the given sample, assuming normally distributed data. The smaller the p-value, the less trustworthy the prediction. For highly non-normal X properties (e.g., fingerprints), the MD p-value is wildly inaccurate.

## Structural Similar Compounds

| Name               | 2-BIPHENYLCARBOXYLIC ACID; 2'-HYDROXYMETHYL-                                        | BENZONIN; OXIME                                                                     | 1-AMINO-4-BENZOYLAMINO-ANTHRAQUINONE                                                |
|--------------------|-------------------------------------------------------------------------------------|-------------------------------------------------------------------------------------|-------------------------------------------------------------------------------------|
| Structure          | 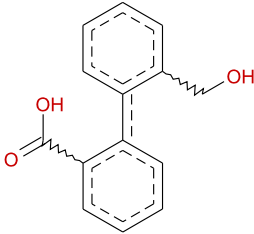 |  |  |
| Actual Endpoint    | Moderate_Severe                                                                     | Mild                                                                                | Mild                                                                                |
| Predicted Endpoint | Mild                                                                                | Mild                                                                                | Mild                                                                                |
| Distance           | 0.593                                                                               | 0.613                                                                               | 0.621                                                                               |
| Reference          | IHFCA Y 6;1:67                                                                      | 28ZPAK-;111:72                                                                      | 28ZPAK-;124:72                                                                      |

## Model Applicability

Unknown features are fingerprint features in the query molecule, but not found or appearing too infrequently in the training set.

1. All properties and OPS components are within expected ranges.

## Feature Contribution

| Top features for positive contribution |            |                                                                                                                                                                        |       |                                    |
|----------------------------------------|------------|------------------------------------------------------------------------------------------------------------------------------------------------------------------------|-------|------------------------------------|
| Fingerprint                            | Bit/Smiles | Feature Structure                                                                                                                                                      | Score | Moderate_Severe<br>in training set |
| FCFP_10                                | 1388176727 | <p>AND Enantiomer</p> 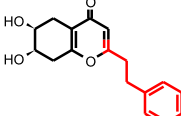 <p><chem>[*]C(=O)CC(c1c(O)c(O)ccc1O)OCCc2ccccc2</chem></p> | 0.389 | 19 out of 19                       |



|                                        |             |                                                                                                                                                       |        |                                    |
|----------------------------------------|-------------|-------------------------------------------------------------------------------------------------------------------------------------------------------|--------|------------------------------------|
| FCFP_10                                | -497728148  | <p>AND Enantiomer</p> 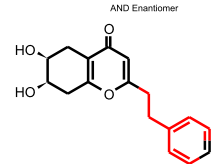 <p>[*]CC[c]1:[cH]:[cH]:[*]:[cH]:[cH]:1</p>  | 0.356  | 24 out of 25                       |
| FCFP_10                                | 1070061035  | <p>AND Enantiomer</p>  <p>[*]C([*])O</p>                           | 0.239  | 284 out of 338                     |
| Top Features for negative contribution |             |                                                                                                                                                       |        |                                    |
| Fingerprint                            | Bit/Smiles  | Feature Structure                                                                                                                                     | Score  | Moderate_Severe<br>in training set |
| FCFP_10                                | 565968762   | <p>AND Enantiomer</p>  <p>[*]C(=[*])C(=O)C</p>                     | -0.372 | 17 out of 38                       |
| FCFP_10                                | -1698724694 | <p>AND Enantiomer</p>  <p>[*]C([*])[c]1:[cH]:[cH]:[cH]:[cH]:1</p> | -0.284 | 53 out of 107                      |
| FCFP_10                                | 436915834   | <p>AND Enantiomer</p>  <p>[*]C\C(=C\[*])\O[*]</p>                | -0.194 | 2 out of 4                         |

AND Enantiomer

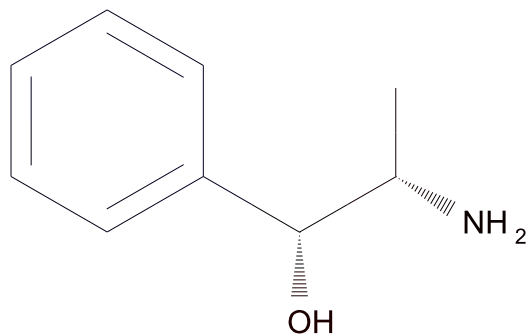 $C_9H_{13}NO$ 

Molecular Weight: 151.206

ALogP: 0.802

Rotatable Bonds: 2

Acceptors: 2

Donors: 2

## Model Prediction

Prediction: Moderate\_Severe

Probability: 0.825

Enrichment: 1.2

Bayesian Score: 0.171

Mahalanobis Distance: 5.12

Mahalanobis Distance p-value: 1

Prediction: Positive if the Bayesian score is above the estimated best cutoff value from minimizing the false positive and false negative rate.

Probability: The estimated probability that the sample is in the positive category. This assumes that the Bayesian score follows a normal distribution and is different from the prediction using a cutoff.

Enrichment: An estimate of enrichment, that is, the increased likelihood (versus random) of this sample being in the category.

Bayesian Score: The standard Laplacian-modified Bayesian score.

Mahalanobis Distance: The Mahalanobis distance (MD) is the distance to the center of the training data. The larger the MD, the less trustworthy the prediction.

Mahalanobis Distance p-value: The p-value gives the fraction of training data with an MD greater than or equal to the one for the given sample, assuming normally distributed data. The smaller the p-value, the less trustworthy the prediction. For highly non-normal X properties (e.g., fingerprints), the MD p-value is wildly inaccurate.

## Structural Similar Compounds

| Name               | 3-AMINO-2-METHYL-BENZYL ALCOHOL | 1;2-DIMETHYL;1;3-BUTANEDIOL | METHYLAMINE;M-PHENYLENEBIS- |
|--------------------|---------------------------------|-----------------------------|-----------------------------|
| Structure          |                                 |                             |                             |
| Actual Endpoint    | Mild                            | Moderate_Severe             | Moderate_Severe             |
| Predicted Endpoint | Mild                            | Moderate_Severe             | Moderate_Severe             |
| Distance           | 0.341                           | 0.459                       | 0.461                       |
| Reference          | AMIHBC 10;61;54                 | AIHAAP 23;95;62             | 28ZPAK-;64;72               |

## Model Applicability

Unknown features are fingerprint features in the query molecule, but not found or appearing too infrequently in the training set.

1. All properties and OPS components are within expected ranges.

## Feature Contribution

### Top features for positive contribution

| Fingerprint | Bit/Smiles | Feature Structure                       | Score | Moderate_Severe in training set |
|-------------|------------|-----------------------------------------|-------|---------------------------------|
| FCFP_10     | 1070061035 | <p>AND Enantiomer</p> <p>[*]C([*])O</p> | 0.239 | 284 out of 338                  |

|                                        |             |                                                                                                                                                            |        |                                    |
|----------------------------------------|-------------|------------------------------------------------------------------------------------------------------------------------------------------------------------|--------|------------------------------------|
| FCFP_10                                | -1043250487 | <p>AND Enantiomer</p> 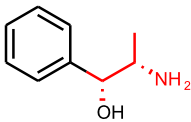 <p>[*]N[C@@H](C)C([*])O</p>                      | 0.22   | 62 out of 75                       |
| FCFP_10                                | 3           | <p>AND Enantiomer</p>  <p>[*]O</p>                                      | 0.165  | 383 out of 491                     |
| Top Features for negative contribution |             |                                                                                                                                                            |        |                                    |
| Fingerprint                            | Bit/Smiles  | Feature Structure                                                                                                                                          | Score  | Moderate_Severe<br>in training set |
| FCFP_10                                | -1698724694 | <p>AND Enantiomer</p>  <p>[*]C([*])[c]1:[cH]:[cH]:[cH]:[cH]:[cH]:1</p>  | -0.284 | 53 out of 107                      |
| FCFP_10                                | 991735244   | <p>AND Enantiomer</p>  <p>[*][c]1:[*]:[cH]:[cH]:[cH]:[cH]:1</p>       | -0.185 | 130 out of 237                     |
| FCFP_10                                | -453677277  | <p>AND Enantiomer</p>  <p>[*]C([*])[c]1:[cH]:[*]:[cH]:[cH]:[cH]:1</p> | -0.13  | 153 out of 264                     |

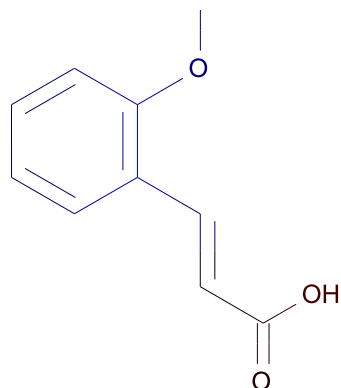C<sub>10</sub>H<sub>10</sub>O<sub>3</sub>

Molecular Weight: 178.185

ALogP: 1.911

Rotatable Bonds: 3

Acceptors: 3

Donors: 1

## Model Prediction

Prediction: Mild

Probability: 0.756

Enrichment: 1.1

Bayesian Score: -2.36

Mahalanobis Distance: 8.17

Mahalanobis Distance p-value: 0.882

Prediction: Positive if the Bayesian score is above the estimated best cutoff value from minimizing the false positive and false negative rate.

Probability: The estimated probability that the sample is in the positive category. This assumes that the Bayesian score follows a normal distribution and is different from the prediction using a cutoff.

Enrichment: An estimate of enrichment, that is, the increased likelihood (versus random) of this sample being in the category.

Bayesian Score: The standard Laplacian-modified Bayesian score.

Mahalanobis Distance: The Mahalanobis distance (MD) is the distance to the center of the training data. The larger the MD, the less trustworthy the prediction.

Mahalanobis Distance p-value: The p-value gives the fraction of training data with an MD greater than or equal to the one for the given sample, assuming normally distributed data. The smaller the p-value, the less trustworthy the prediction. For highly non-normal X properties (e.g., fingerprints), the MD p-value is wildly inaccurate.

## Structural Similar Compounds

| Name               | MANDELIC ACID;<br>ISOPROPYL ESTER | MANDELIC ACID; ETHYL<br>ESTER | SALICYCLIC ACID;<br>METHYL ESTER |
|--------------------|-----------------------------------|-------------------------------|----------------------------------|
| Structure          |                                   |                               |                                  |
| Actual Endpoint    | Moderate_Severe                   | Moderate_Severe               | Mild                             |
| Predicted Endpoint | Moderate_Severe                   | Moderate_Severe               | Mild                             |
| Distance           | 0.469                             | 0.474                         | 0.475                            |
| Reference          | AJOPAA 29;1363;46                 | AJOPAA 29;1363;46             | 28ZPAK-;106;72                   |

## Model Applicability

Unknown features are fingerprint features in the query molecule, but not found or appearing too infrequently in the training set.

1. All properties and OPS components are within expected ranges.

## Feature Contribution

### Top features for positive contribution

| Fingerprint | Bit/Smiles  | Feature Structure | Score | Moderate_Severe<br>in training set |
|-------------|-------------|-------------------|-------|------------------------------------|
| FCFP_10     | -1176841573 | <br>[*]=CC(=O)O   | 0.356 | 41 out of 43                       |

| FCFP_10                                | -2107131107 | 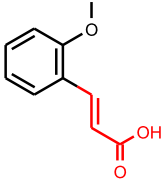<br><chem>[*]C=C\C(=O)O</chem>                              | 0.344  | 6 out of 6                         |
|----------------------------------------|-------------|------------------------------------------------------------------------------------------------------------------------------------------------|--------|------------------------------------|
| FCFP_10                                | -548632217  | <br><chem>[*]C(=[*])O</chem>                                | 0.319  | 54 out of 59                       |
| Top Features for negative contribution |             |                                                                                                                                                |        |                                    |
| Fingerprint                            | Bit/Smiles  | Feature Structure                                                                                                                              | Score  | Moderate_Severe<br>in training set |
| FCFP_10                                | 1458856986  | <br><chem>[*]=C[c]1:[cH]:[cH]:[cH]:[cH]:[cH]:[c]:1OC</chem> | -0.842 | 0 out of 2                         |
| FCFP_10                                | -1977641857 | <br><chem>[*][c](:[*]):[c](OC):[cH]:[*]</chem>             | -0.78  | 4 out of 15                        |
| FCFP_10                                | -146015125  | <br><chem>[*]C(=[*])C=C\c(:[cH]:[*]):[c]([*]):[*]</chem>  | -0.507 | 0 out of 1                         |

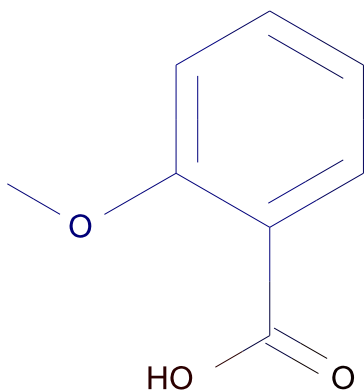C<sub>8</sub>H<sub>8</sub>O<sub>3</sub>

Molecular Weight: 152.147

ALogP: 1.443

Rotatable Bonds: 2

Acceptors: 3

Donors: 1

## Model Prediction

Prediction: Mild

Probability: 0.772

Enrichment: 1.12

Bayesian Score: -1.94

Mahalanobis Distance: 9.76

Mahalanobis Distance p-value: 0.159

Prediction: Positive if the Bayesian score is above the estimated best cutoff value from minimizing the false positive and false negative rate.

Probability: The estimated probability that the sample is in the positive category. This assumes that the Bayesian score follows a normal distribution and is different from the prediction using a cutoff.

Enrichment: An estimate of enrichment, that is, the increased likelihood (versus random) of this sample being in the category.

Bayesian Score: The standard Laplacian-modified Bayesian score.

Mahalanobis Distance: The Mahalanobis distance (MD) is the distance to the center of the training data. The larger the MD, the less trustworthy the prediction.

Mahalanobis Distance p-value: The p-value gives the fraction of training data with an MD greater than or equal to the one for the given sample, assuming normally distributed data. The smaller the p-value, the less trustworthy the prediction. For highly non-normal X properties (e.g., fingerprints), the MD p-value is wildly inaccurate.

## Structural Similar Compounds

| Name               | SALICYCLIC ACID; METHYL ESTER | BENZOIC ACID    | RESORCINOL; MONOACETATE |
|--------------------|-------------------------------|-----------------|-------------------------|
| Structure          |                               |                 |                         |
| Actual Endpoint    | Mild                          | Moderate_Severe | Moderate_Severe         |
| Predicted Endpoint | Mild                          | Moderate_Severe | Moderate_Severe         |
| Distance           | 0.355                         | 0.370           | 0.386                   |
| Reference          | 28ZPAK-;106;72                | BIOFX* 28-4/73  | JAPMA8 46;185;57        |

## Model Applicability

Unknown features are fingerprint features in the query molecule, but not found or appearing too infrequently in the training set.

1. All properties and OPS components are within expected ranges.

## Feature Contribution

### Top features for positive contribution

| Fingerprint | Bit/Smiles | Feature Structure | Score | Moderate_Severe in training set |
|-------------|------------|-------------------|-------|---------------------------------|
| FCFP_10     | -548632217 | <br>[*]C(=[*])O   | 0.319 | 54 out of 59                    |

|                                        |             |                                                                                                                                                |        |                                    |
|----------------------------------------|-------------|------------------------------------------------------------------------------------------------------------------------------------------------|--------|------------------------------------|
| FCFP_10                                | 7           | 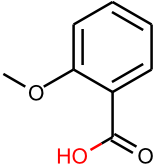<br><chem>[*]O</chem>                                       | 0.219  | 117 out of 142                     |
| FCFP_10                                | -1549222613 | <br><chem>[*]:[c](:[*])C(=O)O</chem>                        | 0.157  | 11 out of 14                       |
| Top Features for negative contribution |             |                                                                                                                                                |        |                                    |
| Fingerprint                            | Bit/Smiles  | Feature Structure                                                                                                                              | Score  | Moderate_Severe<br>in training set |
| FCFP_10                                | 1458856986  | <br><chem>[*]=C[c]1:[cH]:[cH]:[cH]:[cH]:[cH]:[c]:1OC</chem> | -0.842 | 0 out of 2                         |
| FCFP_10                                | -1977641857 | <br><chem>[*][c](:[*]):[c](OC):[cH]:[*]</chem>             | -0.78  | 4 out of 15                        |
| FCFP_10                                | -1099193755 | <br><chem>[*]=C[c]1:[cH]:[*]:[cH]:[cH]:[c]:1OC</chem>     | -0.361 | 2 out of 5                         |

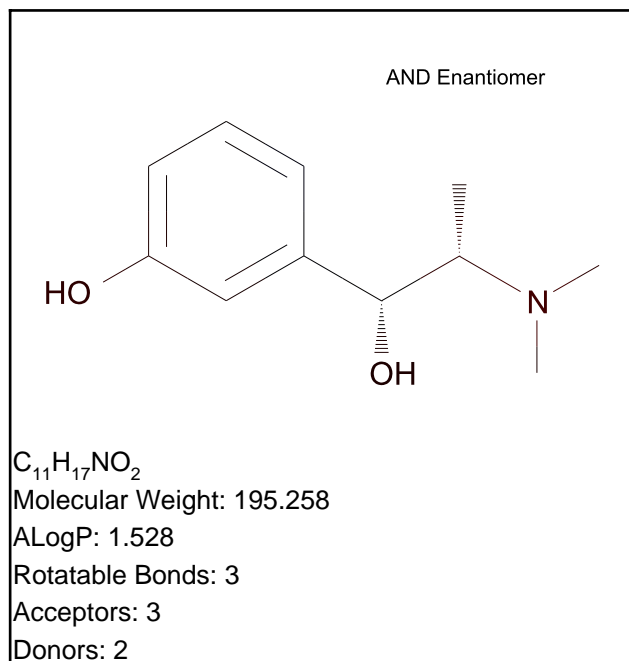

### Model Prediction

Prediction: **Moderate\_Severe**

Probability: 0.864

Enrichment: 1.25

Bayesian Score: 2.28

Mahalanobis Distance: 14.7

Mahalanobis Distance p-value: 1.53e-012

Prediction: Positive if the Bayesian score is above the estimated best cutoff value from minimizing the false positive and false negative rate.

Probability: The estimated probability that the sample is in the positive category. This assumes that the Bayesian score follows a normal distribution and is different from the prediction using a cutoff.

Enrichment: An estimate of enrichment, that is, the increased likelihood (versus random) of this sample being in the category.

Bayesian Score: The standard Laplacian-modified Bayesian score.

Mahalanobis Distance: The Mahalanobis distance (MD) is the distance to the center of the training data. The larger the MD, the less trustworthy the prediction.

Mahalanobis Distance p-value: The p-value gives the fraction of training data with an MD greater than or equal to the one for the given sample, assuming normally distributed data. The smaller the p-value, the less trustworthy the prediction. For highly non-normal X properties (e.g., fingerprints), the MD p-value is wildly inaccurate.

### Structural Similar Compounds

| Name               | o-Toluidine; N,N-bis(2-hydroxyethyl)-                                               | ETHANOL; 2,2'-CYCLOHEXYLIMINODI-                                                    | BENZOIN; OXIME                                                                      |
|--------------------|-------------------------------------------------------------------------------------|-------------------------------------------------------------------------------------|-------------------------------------------------------------------------------------|
| Structure          | 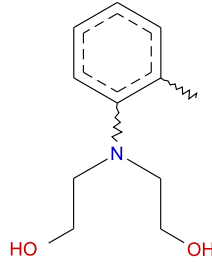 |  |  |
| Actual Endpoint    | Moderate_Severe                                                                     | Moderate_Severe                                                                     | Mild                                                                                |
| Predicted Endpoint | Moderate_Severe                                                                     | Moderate_Severe                                                                     | Mild                                                                                |
| Distance           | 0.482                                                                               | 0.513                                                                               | 0.526                                                                               |
| Reference          | Prehled Prumyslove Toxikologie; Organicke Latky; Marhold; J. -:697;86               | 34ZIAG 61;69                                                                        | 28ZPAK-;111;72                                                                      |

### Model Applicability

Unknown features are fingerprint features in the query molecule, but not found or appearing too infrequently in the training set.

- All properties and OPS components are within expected ranges.

### Feature Contribution

| Top features for positive contribution |            |                                                                                                                                                                                                   |       |                                 |
|----------------------------------------|------------|---------------------------------------------------------------------------------------------------------------------------------------------------------------------------------------------------|-------|---------------------------------|
| Fingerprint                            | Bit/Smiles | Feature Structure                                                                                                                                                                                 | Score | Moderate_Severe in training set |
| FCFP_10                                | -158888774 | <p style="text-align: center;">AND Enantiomer</p> 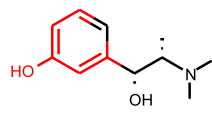 <p> <chem>[*][c]1:[*]:[cH]:[cH]:[c](O):[cH]:1</chem> </p> | 0.356 | 24 out of 25                    |



|                                        |             |                                                                                                                                                             |        |                                 |
|----------------------------------------|-------------|-------------------------------------------------------------------------------------------------------------------------------------------------------------|--------|---------------------------------|
| FCFP_10                                | -1849700223 | <p>AND Enantiomer</p> 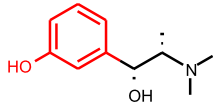 <p>[*][c]1:[cH]:[cH]:[cH]:[cH]:[c](O):[cH]:1</p>  | 0.344  | 6 out of 6                      |
| FCFP_10                                | 136388789   | <p>AND Enantiomer</p>  <p>[*]N([*])C</p>                                 | 0.331  | 28 out of 30                    |
| Top Features for negative contribution |             |                                                                                                                                                             |        |                                 |
| Fingerprint                            | Bit/Smiles  | Feature Structure                                                                                                                                           | Score  | Moderate_Severe in training set |
| FCFP_10                                | -1694796561 | <p>AND Enantiomer</p>  <p>[*]C([*])[c]1:[cH]:[cH]:[cH]:[c](O):[cH]:1</p> | -0.6   | 1 out of 4                      |
| FCFP_10                                | 991735244   | <p>AND Enantiomer</p>  <p>[*][c]1:[*]:[cH]:[cH]:[cH]:[cH]:1</p>        | -0.185 | 130 out of 237                  |
| FCFP_10                                | -453677277  | <p>AND Enantiomer</p>  <p>[*]C([*])[c]1:[cH]:[*]:[cH]:[cH]:[cH]:1</p>  | -0.13  | 153 out of 264                  |

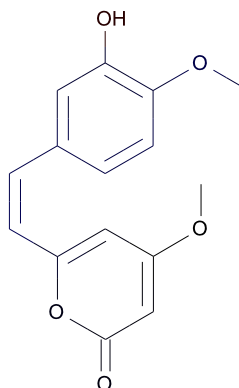C<sub>15</sub>H<sub>14</sub>O<sub>5</sub>

Molecular Weight: 274.269

ALogP: 1.969

Rotatable Bonds: 4

Acceptors: 5

Donors: 1

## Model Prediction

Prediction: Mild

Probability: 0.761

Enrichment: 1.1

Bayesian Score: -2.23

Mahalanobis Distance: 9.91

Mahalanobis Distance p-value: 0.116

Prediction: Positive if the Bayesian score is above the estimated best cutoff value from minimizing the false positive and false negative rate.

Probability: The estimated probability that the sample is in the positive category. This assumes that the Bayesian score follows a normal distribution and is different from the prediction using a cutoff.

Enrichment: An estimate of enrichment, that is, the increased likelihood (versus random) of this sample being in the category.

Bayesian Score: The standard Laplacian-modified Bayesian score.

Mahalanobis Distance: The Mahalanobis distance (MD) is the distance to the center of the training data. The larger the MD, the less trustworthy the prediction.

Mahalanobis Distance p-value: The p-value gives the fraction of training data with an MD greater than or equal to the one for the given sample, assuming normally distributed data. The smaller the p-value, the less trustworthy the prediction. For highly non-normal X properties (e.g., fingerprints), the MD p-value is wildly inaccurate.

## Structural Similar Compounds

| Name               | 2;8;9-TRIOXA-5-AZA-1-SILABICYCLO(3.3.3)UNDECANE;1-(3-AMINOPROPYL)- | 2;5-DICHLORO-4(3'-METHYL-5' PYRAZOLON-1'-YL)BENZENE SULFONIC ACID | BENZOIC ACID; 5-(CHLOROSULFONYL)-2;4-DICHLORO- |
|--------------------|--------------------------------------------------------------------|-------------------------------------------------------------------|------------------------------------------------|
| Structure          |                                                                    |                                                                   |                                                |
| Actual Endpoint    | Moderate_Severe                                                    | Mild                                                              | Moderate_Severe                                |
| Predicted Endpoint | Moderate_Severe                                                    | Mild                                                              | Moderate_Severe                                |
| Distance           | 0.587                                                              | 0.648                                                             | 0.664                                          |
| Reference          | 28ZPAK-;220;72                                                     | 28ZPAK-;186;72                                                    | FCTOD7 20;573;82                               |

## Model Applicability

Unknown features are fingerprint features in the query molecule, but not found or appearing too infrequently in the training set.

1. All properties and OPS components are within expected ranges.

## Feature Contribution

| Top features for positive contribution |            |                   |       |                                 |
|----------------------------------------|------------|-------------------|-------|---------------------------------|
| Fingerprint                            | Bit/Smiles | Feature Structure | Score | Moderate_Severe in training set |
| FCFP_10                                | 7          | <br>[*]O          | 0.219 | 117 out of 142                  |

|                                        |             |                                                                                                                                                      |        |                                 |
|----------------------------------------|-------------|------------------------------------------------------------------------------------------------------------------------------------------------------|--------|---------------------------------|
| FCFP_10                                | 523826990   | 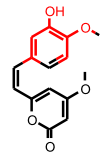<br><chem>[*]O[c]1:[cH]:[*]:[c]([*]):[cH]:[c]:1O</chem>           | 0.186  | 1 out of 1                      |
| FCFP_10                                | 74595001    | <br><chem>[*]:[cH]:[c](O):[cH]:[*]</chem>                         | 0.16   | 63 out of 81                    |
| Top Features for negative contribution |             |                                                                                                                                                      |        |                                 |
| Fingerprint                            | Bit/Smiles  | Feature Structure                                                                                                                                    | Score  | Moderate_Severe in training set |
| FCFP_10                                | -1977641857 | <br><chem>[*][c](:[*]):[c](OC):[cH]:[*]</chem>                    | -0.78  | 4 out of 15                     |
| FCFP_10                                | -146015125  | <br><chem>[*]C(=[*])C=C[c](:[cH]:[*])[c]([*]):[*]</chem>         | -0.507 | 0 out of 1                      |
| FCFP_10                                | -747977902  | <br><chem>[*]O[c]1:[cH]:[cH]:[c](\C=C/[*]):[cH]:[c]:1[*]</chem> | -0.507 | 0 out of 1                      |

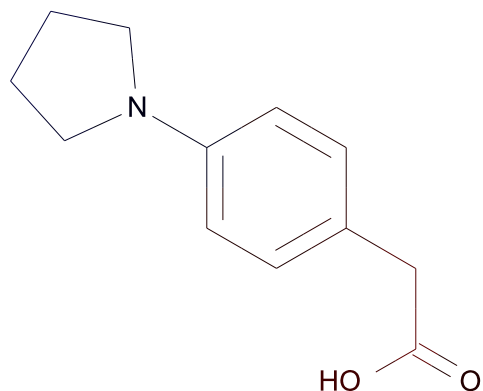

$C_{12}H_{15}NO_2$

Molecular Weight: 205.253

ALogP: 2.117

Rotatable Bonds: 3

Acceptors: 3

Donors: 1

## Model Prediction

Prediction: Moderate\_Severe

Probability: 0.837

Enrichment: 1.22

Bayesian Score: 1.1

Mahalanobis Distance: 11.3

Mahalanobis Distance p-value: 0.00124

Prediction: Positive if the Bayesian score is above the estimated best cutoff value from minimizing the false positive and false negative rate.

Probability: The estimated probability that the sample is in the positive category. This assumes that the Bayesian score follows a normal distribution and is different from the prediction using a cutoff.

Enrichment: An estimate of enrichment, that is, the increased likelihood (versus random) of this sample being in the category.

Bayesian Score: The standard Laplacian-modified Bayesian score.

Mahalanobis Distance: The Mahalanobis distance (MD) is the distance to the center of the training data. The larger the MD, the less trustworthy the prediction.

Mahalanobis Distance p-value: The p-value gives the fraction of training data with an MD greater than or equal to the one for the given sample, assuming normally distributed data. The smaller the p-value, the less trustworthy the prediction. For highly non-normal X properties (e.g., fingerprints), the MD p-value is wildly inaccurate.

## Structural Similar Compounds

| Name               | 1-NAPHTHALENEACETIC ACID | Propionitrile; 3-(N-(2-hydroxyethyl)anilino)-                         | MANDELIC ACID; ISOPROPYL ESTER |
|--------------------|--------------------------|-----------------------------------------------------------------------|--------------------------------|
| Structure          |                          |                                                                       |                                |
| Actual Endpoint    | Moderate_Severe          | Mild                                                                  | Moderate_Severe                |
| Predicted Endpoint | Moderate_Severe          | Mild                                                                  | Moderate_Severe                |
| Distance           | 0.492                    | 0.492                                                                 | 0.505                          |
| Reference          | PESTC* 9;10;80           | Prehled Prumyslove Toxikologie; Organicke Latky; Marhold; J. -;918;86 | AJOPAA 29;1363;46              |

## Model Applicability

Unknown features are fingerprint features in the query molecule, but not found or appearing too infrequently in the training set.

1. All properties and OPS components are within expected ranges.

## Feature Contribution

| Top features for positive contribution |            |                                                               |       |                                 |
|----------------------------------------|------------|---------------------------------------------------------------|-------|---------------------------------|
| Fingerprint                            | Bit/Smiles | Feature Structure                                             | Score | Moderate_Severe in training set |
| FCFP_10                                | 1985089045 | <br><chem>[*]N([*])[c]1:[cH]:[cH]:[c]([*])([*])CC(=O)O</chem> | 0.385 | 16 out of 16                    |

| FCFP_10                                | -1176841573 | 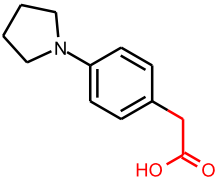<br><chem>[*]=CC(=O)O</chem>                                | 0.356  | 41 out of 43                    |
|----------------------------------------|-------------|------------------------------------------------------------------------------------------------------------------------------------------------|--------|---------------------------------|
| FCFP_10                                | -497728148  | <br><chem>[*]CC[c]1:[cH]:[cH]:[*]:[cH]:[cH]:1</chem>        | 0.356  | 24 out of 25                    |
| Top Features for negative contribution |             |                                                                                                                                                |        |                                 |
| Fingerprint                            | Bit/Smiles  | Feature Structure                                                                                                                              | Score  | Moderate_Severe in training set |
| FCFP_10                                | -822674211  | <br><chem>[*]:[c](:[*])N1CCCC1</chem>                       | -0.842 | 0 out of 2                      |
| FCFP_10                                | 202105689   | <br><chem>[*][c]1:[cH]:[cH]:[c]([cH]:[cH]:1)N2CCCC2</chem> | -0.361 | 2 out of 5                      |
| FCFP_10                                | -453677277  | <br><chem>[*]C([*])[c]1:[cH]:[*]:[cH]:[cH]:[cH]:1</chem>  | -0.13  | 153 out of 264                  |

AND Enantiomer

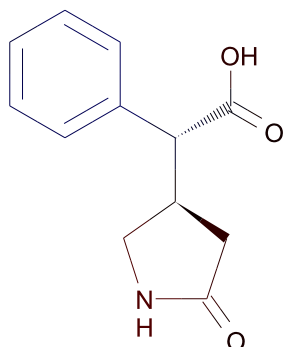C<sub>12</sub>H<sub>13</sub>NO<sub>3</sub>

Molecular Weight: 219.237

ALogP: 0.621

Rotatable Bonds: 3

Acceptors: 3

Donors: 2

## Model Prediction

Prediction: Moderate\_Severe

Probability: 0.832

Enrichment: 1.21

Bayesian Score: 0.66

Mahalanobis Distance: 9.42

Mahalanobis Distance p-value: 0.293

Prediction: Positive if the Bayesian score is above the estimated best cutoff value from minimizing the false positive and false negative rate.

Probability: The estimated probability that the sample is in the positive category. This assumes that the Bayesian score follows a normal distribution and is different from the prediction using a cutoff.

Enrichment: An estimate of enrichment, that is, the increased likelihood (versus random) of this sample being in the category.

Bayesian Score: The standard Laplacian-modified Bayesian score.

Mahalanobis Distance: The Mahalanobis distance (MD) is the distance to the center of the training data. The larger the MD, the less trustworthy the prediction.

Mahalanobis Distance p-value: The p-value gives the fraction of training data with an MD greater than or equal to the one for the given sample, assuming normally distributed data. The smaller the p-value, the less trustworthy the prediction. For highly non-normal X properties (e.g., fingerprints), the MD p-value is wildly inaccurate.

## Structural Similar Compounds

| Name               | ACETANILIDE; 3'-AMINO-4'-ETHOXY- | ACETIC ACID; CYCLOHEXYLAMINO- | Anthranilic acid; N-methyl-                                           |
|--------------------|----------------------------------|-------------------------------|-----------------------------------------------------------------------|
| Structure          |                                  |                               |                                                                       |
| Actual Endpoint    | Mild                             | Mild                          | Moderate_Severe                                                       |
| Predicted Endpoint | Mild                             | Mild                          | Mild                                                                  |
| Distance           | 0.496                            | 0.508                         | 0.518                                                                 |
| Reference          | 28ZPAK 115;72                    | 28ZPAK-;64;72                 | Prehled Prumyslove Toxikologie; Organicke Latky; Marhold; J. -;741;86 |

## Model Applicability

Unknown features are fingerprint features in the query molecule, but not found or appearing too infrequently in the training set.

1. All properties and OPS components are within expected ranges.

## Feature Contribution

| Top features for positive contribution |             |                                          |       |                                 |
|----------------------------------------|-------------|------------------------------------------|-------|---------------------------------|
| Fingerprint                            | Bit/Smiles  | Feature Structure                        | Score | Moderate_Severe in training set |
| FCFP_10                                | -1176841573 | <p>AND Enantiomer</p> <p>[*]=CC(=O)O</p> | 0.356 | 41 out of 43                    |

|                                        |             |                                                                                                                                                                                      |        |                                 |
|----------------------------------------|-------------|--------------------------------------------------------------------------------------------------------------------------------------------------------------------------------------|--------|---------------------------------|
| FCFP_10                                | -416918913  | <p>AND Enantiomer</p> 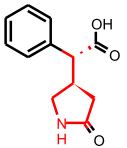 <p><chem>[*]C([*])[C@@H]1CNC(=O)C1</chem></p>                              | 0.332  | 5 out of 5                      |
| FCFP_10                                | -548632217  | <p>AND Enantiomer</p>  <p><chem>[*]C(=[*])O</chem></p>                                            | 0.319  | 54 out of 59                    |
| Top Features for negative contribution |             |                                                                                                                                                                                      |        |                                 |
| Fingerprint                            | Bit/Smiles  | Feature Structure                                                                                                                                                                    | Score  | Moderate_Severe in training set |
| FCFP_10                                | -1133295320 | <p>AND Enantiomer</p>  <p><chem>[*]C([*])[C@@H](C(=[*])[*])[c]1:[cH]:[cH]:[cH]:[cH]:1</chem></p>  | -0.507 | 0 out of 1                      |
| FCFP_10                                | -1716639150 | <p>AND Enantiomer</p>  <p><chem>[*]C([*])[C@@H](C(=[*])[*])[c]1:[cH]:[cH]:[cH]:[cH]:1</chem></p> | -0.507 | 0 out of 1                      |
| FCFP_10                                | -1698724694 | <p>AND Enantiomer</p>  <p><chem>[*]C([*])[c]1:[cH]:[cH]:[cH]:[cH]:1</chem></p>                  | -0.284 | 53 out of 107                   |

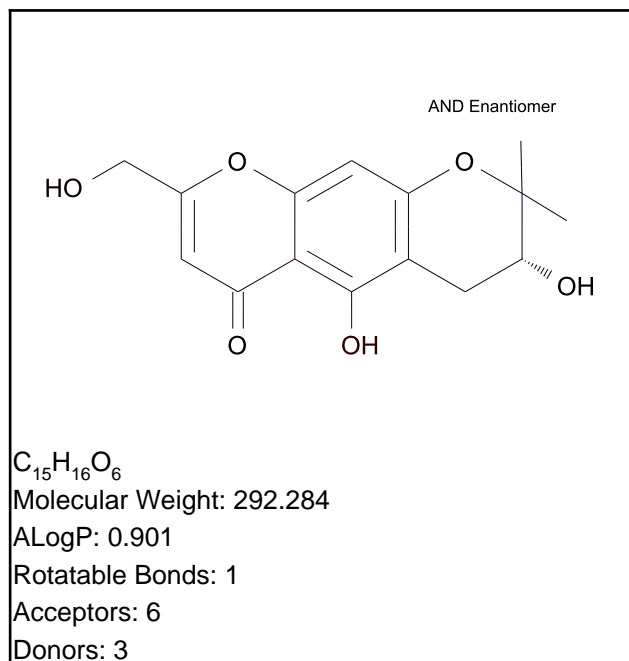

## Model Prediction

Prediction: **Moderate\_Severe**

Probability: 0.836

Enrichment: 1.21

Bayesian Score: 0.995

Mahalanobis Distance: 9.89

Mahalanobis Distance p-value: 0.121

Prediction: Positive if the Bayesian score is above the estimated best cutoff value from minimizing the false positive and false negative rate.

Probability: The estimated probability that the sample is in the positive category. This assumes that the Bayesian score follows a normal distribution and is different from the prediction using a cutoff.

Enrichment: An estimate of enrichment, that is, the increased likelihood (versus random) of this sample being in the category.

Bayesian Score: The standard Laplacian-modified Bayesian score.

Mahalanobis Distance: The Mahalanobis distance (MD) is the distance to the center of the training data. The larger the MD, the less trustworthy the prediction.

Mahalanobis Distance p-value: The p-value gives the fraction of training data with an MD greater than or equal to the one for the given sample, assuming normally distributed data. The smaller the p-value, the less trustworthy the prediction. For highly non-normal X properties (e.g., fingerprints), the MD p-value is wildly inaccurate.

## Structural Similar Compounds

| Name               | 2-NAPHTHALENESULFONIC ACID; 4-HYDROXY-7-(METHYLAMINO)- | ANTHRAQUINONE; 1-((2-HYDROXYETHYL)AMINO)-4-(METHYLAMINO)- | 1;2;4-TRIHYDROXY ANTHRAQUINONE |
|--------------------|--------------------------------------------------------|-----------------------------------------------------------|--------------------------------|
| Structure          |                                                        |                                                           |                                |
| Actual Endpoint    | Mild                                                   | Mild                                                      | Mild                           |
| Predicted Endpoint | Mild                                                   | Mild                                                      | Mild                           |
| Distance           | 0.614                                                  | 0.647                                                     | 0.650                          |
| Reference          | 28ZPAK 190;72                                          | 28ZPAK 245;72                                             | 28ZPAK-;103;7                  |

## Model Applicability

Unknown features are fingerprint features in the query molecule, but not found or appearing too infrequently in the training set.

- All properties and OPS components are within expected ranges.

## Feature Contribution

| Top features for positive contribution |             |                                                                        |       |                                 |
|----------------------------------------|-------------|------------------------------------------------------------------------|-------|---------------------------------|
| Fingerprint                            | Bit/Smiles  | Feature Structure                                                      | Score | Moderate_Severe in training set |
| FCFP_10                                | -1601875224 | <br><chem>[*]C[c]1:[c]([*]):[*]:[c]([*]):[c](C(=[*])[*]):[c]:1O</chem> | 0.352 | 7 out of 7                      |



|                                        |             |                                                                                                                                                                         |        |                                 |
|----------------------------------------|-------------|-------------------------------------------------------------------------------------------------------------------------------------------------------------------------|--------|---------------------------------|
| FCFP_10                                | -1272709286 | 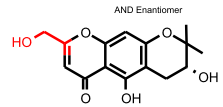 <p>AND Enantiomer</p> <chem>[*][C@H]1[*][*]NC1</chem>                               | 0.285  | 234 out of 266                  |
| FCFP_10                                | 1679744180  |  <p>AND Enantiomer</p> <chem>[*]O[c]1:[cH]:[c](O[*]):[c]([*]):[*]:[c]:1[*]</chem>    | 0.256  | 2 out of 2                      |
| Top Features for negative contribution |             |                                                                                                                                                                         |        |                                 |
| Fingerprint                            | Bit/Smiles  | Feature Structure                                                                                                                                                       | Score  | Moderate_Severe in training set |
| FCFP_10                                | -2006448698 |  <p>AND Enantiomer</p> <chem>[*][c]([*]):[c]1C[C@@H](O)C([*])([*])[*][c]:1[*]</chem> | -0.507 | 0 out of 1                      |
| FCFP_10                                | -1099193755 |  <p>AND Enantiomer</p> <chem>[*]=C[c]1:[cH]:[*]:[cH]:[cH]:[c]:1OC</chem>            | -0.361 | 2 out of 5                      |
| FCFP_10                                | 436915834   |  <p>AND Enantiomer</p> <chem>[*]C\C(=C\[*])\O[*]</chem>                            | -0.194 | 2 out of 4                      |

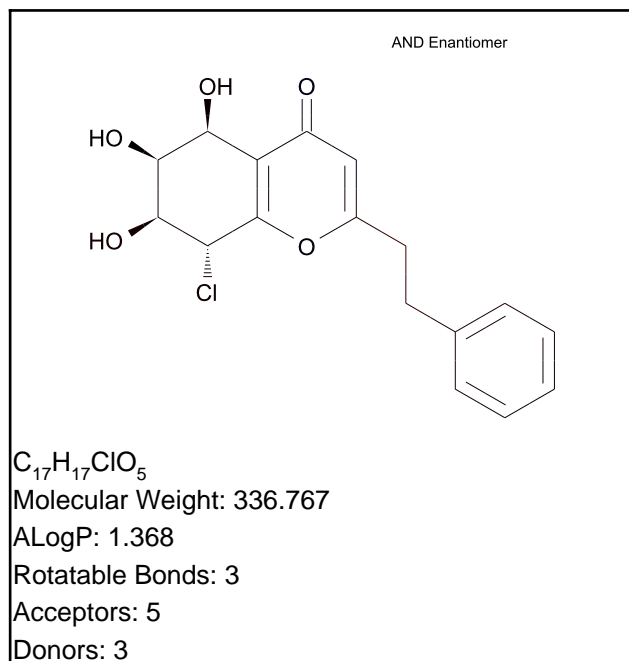

## Model Prediction

**Prediction: Moderate Severe**

Probability: 0.836

Enrichment: 1.21

Bayesian Score: 0.958

Mahalanobis Distance: 12.2

Mahalanobis Distance p-value: 1.98e-005

Prediction: Positive if the Bayesian score is above the estimated best cutoff value from minimizing the false positive and false negative rate.

**Probability:** The estimated probability that the sample is in the positive category. This assumes that the Bayesian score follows a normal distribution and is different from the prediction using a cutoff.

Enrichment: An estimate of enrichment, that is, the increased likelihood (versus random) of this sample being in the category.  
Bayesian Score: The standard Laplacian-modified Bayesian score.

**Mahalanobis Distance:** The Mahalanobis distance (MD) is the distance to the center of the training data. The larger the MD, the less trustworthy the prediction.

Mahalanobis Distance p-value: The p-value gives the fraction of training data with an MD greater than or equal to the one for the given sample, assuming normally distributed data. The smaller the p-value, the less trustworthy the prediction. For highly non-normal X properties (e.g., fingerprints), the MD p-value is wildly inaccurate.

## Structural Similar Compounds

| Name               | ANTHRAQUINONE; 1-((2-HYDROXYETHYL)AMINO)-4-(METHYLAMINO)-                           | p-Acetophenetidine; 3'-(bis(2-hydroxyethyl)amino)-                                  | 2-NAPHTHALENESULFONIC ACID; 4-HYDROXY-7-(METHYLAMINO)-                              |
|--------------------|-------------------------------------------------------------------------------------|-------------------------------------------------------------------------------------|-------------------------------------------------------------------------------------|
| Structure          | 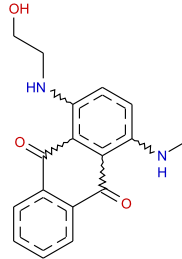 |  |  |
| Actual Endpoint    | Mild                                                                                | Moderate_Severe                                                                     | Mild                                                                                |
| Predicted Endpoint | Mild                                                                                | Moderate_Severe                                                                     | Mild                                                                                |
| Distance           | 0.542                                                                               | 0.671                                                                               | 0.687                                                                               |
| Reference          | 28ZPAK 245;72                                                                       | Prehled Prumyslove Toxikologie; Organicke Latky; Marhold; J. -:645;86               | 28ZPAK 190;72                                                                       |

## Model Applicability

Unknown features are fingerprint features in the query molecule, but not found or appearing too infrequently in the training set.

1. All properties and OPS components are within expected ranges.

## Feature Contribution

## Top features for positive contribution

| Fingerprint | Bit/Smiles | Feature Structure                                                                                                                                                                                   | Score | Moderate_Severe<br>in training set |
|-------------|------------|-----------------------------------------------------------------------------------------------------------------------------------------------------------------------------------------------------|-------|------------------------------------|
| FCFP_10     | 1388176727 | <p>AND Enantiomer</p> 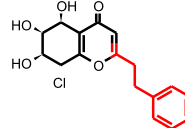 <p><chem>[*]C(=O)CC(c1c(O)c(O)c(Cl)oc1OCCc2ccccc2)[cH]:[cH]:[cH]:[cH]:[cH]:1</chem></p> | 0.389 | 19 out of 19                       |

|                                        |             |                                                                                                                                                            |        |                                    |
|----------------------------------------|-------------|------------------------------------------------------------------------------------------------------------------------------------------------------------|--------|------------------------------------|
| FCFP_10                                | -497728148  | <p>AND Enantiomer</p> 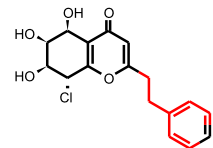 <p>[*]CC[c]1:[cH]:[cH]:[cH]:[*]:[cH]:[cH]:1</p>  | 0.356  | 24 out of 25                       |
| FCFP_10                                | 1070061035  | <p>AND Enantiomer</p>  <p>[*]C([*])O</p>                                | 0.239  | 284 out of 338                     |
| Top Features for negative contribution |             |                                                                                                                                                            |        |                                    |
| Fingerprint                            | Bit/Smiles  | Feature Structure                                                                                                                                          | Score  | Moderate_Severe<br>in training set |
| FCFP_10                                | 565968762   | <p>AND Enantiomer</p>  <p>[*]C([*])C(=O)C</p>                           | -0.372 | 17 out of 38                       |
| FCFP_10                                | -1698724694 | <p>AND Enantiomer</p>  <p>[*]C([*])[c]1:[cH]:[cH]:[cH]:[cH]:[cH]:1</p> | -0.284 | 53 out of 107                      |
| FCFP_10                                | 436915834   | <p>AND Enantiomer</p>  <p>[*]C\C(=C\[*])\O[*]</p>                     | -0.194 | 2 out of 4                         |

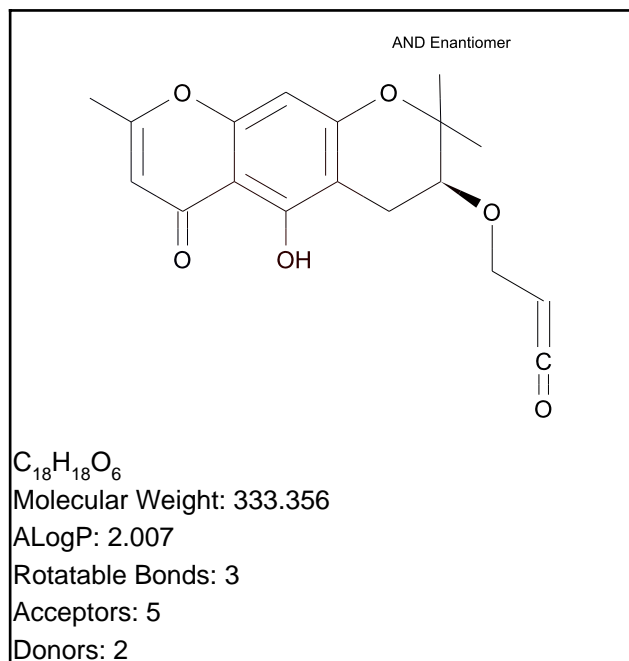

### Model Prediction

Prediction: **Moderate\_Severe**

Probability: 0.829

Enrichment: 1.2

Bayesian Score: 0.464

Mahalanobis Distance: 8.79

Mahalanobis Distance p-value: 0.625

Prediction: Positive if the Bayesian score is above the estimated best cutoff value from minimizing the false positive and false negative rate.

Probability: The estimated probability that the sample is in the positive category. This assumes that the Bayesian score follows a normal distribution and is different from the prediction using a cutoff.

Enrichment: An estimate of enrichment, that is, the increased likelihood (versus random) of this sample being in the category.

Bayesian Score: The standard Laplacian-modified Bayesian score.

Mahalanobis Distance: The Mahalanobis distance (MD) is the distance to the center of the training data. The larger the MD, the less trustworthy the prediction.

Mahalanobis Distance p-value: The p-value gives the fraction of training data with an MD greater than or equal to the one for the given sample, assuming normally distributed data. The smaller the p-value, the less trustworthy the prediction. For highly non-normal X properties (e.g., fingerprints), the MD p-value is wildly inaccurate.

### Structural Similar Compounds

| Name               | 1-AMINO-4-BENZOYLAMINO-ANTHRAQUINONE                                                | ANTHRAQUINONE; 1-AMINO-4-HYDROXY-2-PHENOXY-                                         | 5-NORBORNENE-2;3-DICARBOXYLIC ACID; 1;4;5;6;7;7-HEXACHLORO-                         |
|--------------------|-------------------------------------------------------------------------------------|-------------------------------------------------------------------------------------|-------------------------------------------------------------------------------------|
| Structure          | 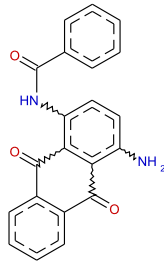 |  |  |
| Actual Endpoint    | Mild                                                                                | Mild                                                                                | Moderate_Severe                                                                     |
| Predicted Endpoint | Mild                                                                                | Mild                                                                                | Moderate_Severe                                                                     |
| Distance           | 0.608                                                                               | 0.610                                                                               | 0.625                                                                               |
| Reference          | 28ZPAK-;124;72                                                                      | 28ZPAK 239;72                                                                       | 28ZPAK-;92;72                                                                       |

### Model Applicability

Unknown features are fingerprint features in the query molecule, but not found or appearing too infrequently in the training set.

- All properties and OPS components are within expected ranges.
- Unknown FCFP\_2 feature: 444624378: [\*]C=C=O

### Feature Contribution

| Top features for positive contribution |             |                                                                                                                                                            |       |                                 |
|----------------------------------------|-------------|------------------------------------------------------------------------------------------------------------------------------------------------------------|-------|---------------------------------|
| Fingerprint                            | Bit/Smiles  | Feature Structure                                                                                                                                          | Score | Moderate_Severe in training set |
| FCFP_10                                | -1601875224 | 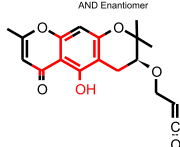<br><chem>[*]C[c]1:[c]([*]):[*]:[c]([*]):[c](C=[*])[*]):[c]:1O</chem> | 0.352 | 7 out of 7                      |

|                                        |             |                                                                                                                                                                 |        |                                 |
|----------------------------------------|-------------|-----------------------------------------------------------------------------------------------------------------------------------------------------------------|--------|---------------------------------|
| FCFP_10                                | 1679744180  | <p>AND Enantiomer</p> 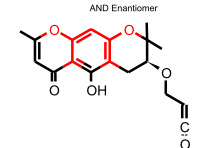 <p>[*]O[c]1:[cH]:[c](O[*])]:[c]([*]):[*]:[c]:1[*]</p> | 0.256  | 2 out of 2                      |
| FCFP_10                                | 7           | <p>AND Enantiomer</p>  <p>[*]O</p>                                           | 0.219  | 117 out of 142                  |
| Top Features for negative contribution |             |                                                                                                                                                                 |        |                                 |
| Fingerprint                            | Bit/Smiles  | Feature Structure                                                                                                                                               | Score  | Moderate_Severe in training set |
| FCFP_10                                | -1099193755 | <p>AND Enantiomer</p>  <p>[*]=C[c]1:[cH]:[*]:[cH]:[cH]:[c]:1OC</p>           | -0.361 | 2 out of 5                      |
| FCFP_10                                | 436915834   | <p>AND Enantiomer</p>  <p>[*]C\C(=C\[*])\O[*]</p>                           | -0.194 | 2 out of 4                      |
| FCFP_10                                | -1549192822 | <p>AND Enantiomer</p>  <p>[*]C(=[*])C(=O)[c]([*]):[*]</p>                  | -0.11  | 7 out of 12                     |

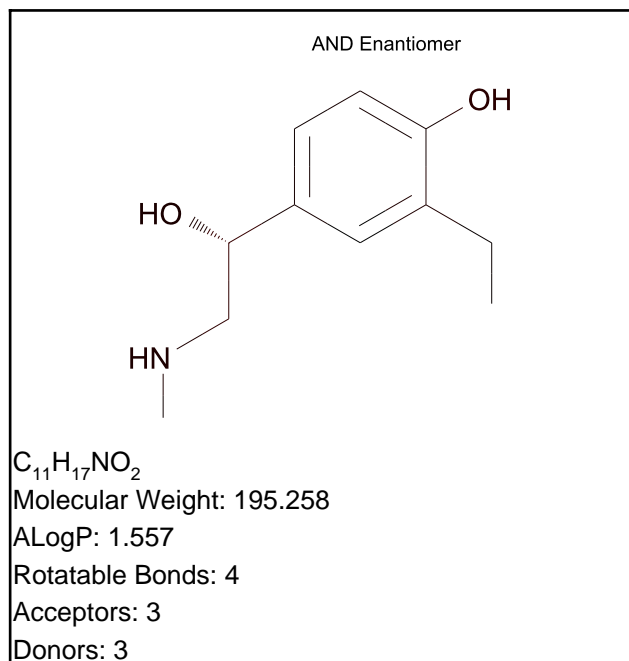

### Model Prediction

Prediction: **Moderate\_Severe**

Probability: 0.848

Enrichment: 1.23

Bayesian Score: 1.84

Mahalanobis Distance: 7.65

Mahalanobis Distance p-value: 0.974

Prediction: Positive if the Bayesian score is above the estimated best cutoff value from minimizing the false positive and false negative rate.

Probability: The estimated probability that the sample is in the positive category. This assumes that the Bayesian score follows a normal distribution and is different from the prediction using a cutoff.

Enrichment: An estimate of enrichment, that is, the increased likelihood (versus random) of this sample being in the category.

Bayesian Score: The standard Laplacian-modified Bayesian score.

Mahalanobis Distance: The Mahalanobis distance (MD) is the distance to the center of the training data. The larger the MD, the less trustworthy the prediction.

Mahalanobis Distance p-value: The p-value gives the fraction of training data with an MD greater than or equal to the one for the given sample, assuming normally distributed data. The smaller the p-value, the less trustworthy the prediction. For highly non-normal X properties (e.g., fingerprints), the MD p-value is wildly inaccurate.

### Structural Similar Compounds

| Name               | 2,3-DIMETHYL;1;2;6-<br>HEXANETRIOL                                                  | p-Phenylenediamine; N;N-<br>bis(2-hydroxyethyl)-;<br>sulfate (1:1)                  | METHANE;TRIS(4-<br>AMINOPHENYL)-                                                    |
|--------------------|-------------------------------------------------------------------------------------|-------------------------------------------------------------------------------------|-------------------------------------------------------------------------------------|
| Structure          | 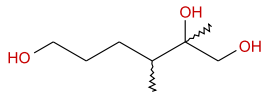 |  |  |
| Actual Endpoint    | Mild                                                                                | Mild                                                                                | Moderate_Severe                                                                     |
| Predicted Endpoint | Mild                                                                                | Mild                                                                                | Moderate_Severe                                                                     |
| Distance           | 0.625                                                                               | 0.653                                                                               | 0.659                                                                               |
| Reference          | AIHAAP 23;95;62                                                                     | Prehled Prumyslove<br>Toxikologie; Organické<br>Latky; Marhold; J. -;695;86         | 28ZPAK-;73;72                                                                       |

### Model Applicability

Unknown features are fingerprint features in the query molecule, but not found or appearing too infrequently in the training set.

1. All properties and OPS components are within expected ranges.

### Feature Contribution

| Top features for positive contribution |            |                                                                                                                                              |       |                                    |
|----------------------------------------|------------|----------------------------------------------------------------------------------------------------------------------------------------------|-------|------------------------------------|
| Fingerprint                            | Bit/Smiles | Feature Structure                                                                                                                            | Score | Moderate_Severe<br>in training set |
| FCFP_10                                | 226619748  | <p>AND Enantiomer</p> 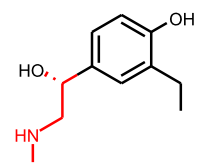 <p><chem>[*]C([*])CNC</chem></p> | 0.294 | 3 out of 3                         |

|                                        |             |                                                                                                                                                                |        |                                 |
|----------------------------------------|-------------|----------------------------------------------------------------------------------------------------------------------------------------------------------------|--------|---------------------------------|
| FCFP_10                                | -306804326  | <p>AND Enantiomer</p> 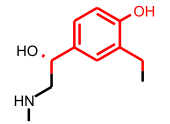 <p>[*]C[c]1:[cH]:[c](:[cH]:[cH]:[c]:1O)C([*])[*]</p> | 0.294  | 3 out of 3                      |
| FCFP_10                                | -1272709286 | <p>AND Enantiomer</p>  <p>[*][C@H]1[*][*]NC1</p>                            | 0.285  | 234 out of 266                  |
| Top Features for negative contribution |             |                                                                                                                                                                |        |                                 |
| Fingerprint                            | Bit/Smiles  | Feature Structure                                                                                                                                              | Score  | Moderate_Severe in training set |
| FCFP_10                                | 136686699   | <p>AND Enantiomer</p>  <p>[*]NC</p>                                         | -0.243 | 6 out of 12                     |
| FCFP_10                                | -1604301295 | <p>AND Enantiomer</p>  <p>[*]C[c]1:[cH]:[*]:[cH]:[cH]:[c]:1O</p>          | -0.164 | 15 out of 27                    |
| FCFP_10                                | -453677277  | <p>AND Enantiomer</p>  <p>[*]C([*])[c]1:[cH]:[*]:[cH]:[cH]:[cH]:1</p>     | -0.13  | 153 out of 264                  |

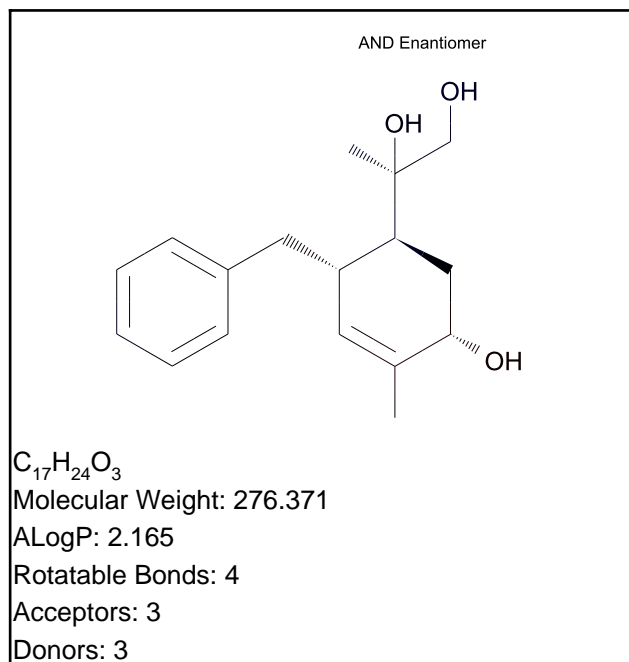

### Model Prediction

Prediction: **Moderate\_Severe**

Probability: 0.824

Enrichment: 1.2

Bayesian Score: 0.142

Mahalanobis Distance: 9.04

Mahalanobis Distance p-value: 0.49

Prediction: Positive if the Bayesian score is above the estimated best cutoff value from minimizing the false positive and false negative rate.

Probability: The estimated probability that the sample is in the positive category. This assumes that the Bayesian score follows a normal distribution and is different from the prediction using a cutoff.

Enrichment: An estimate of enrichment, that is, the increased likelihood (versus random) of this sample being in the category.

Bayesian Score: The standard Laplacian-modified Bayesian score.

Mahalanobis Distance: The Mahalanobis distance (MD) is the distance to the center of the training data. The larger the MD, the less trustworthy the prediction.

Mahalanobis Distance p-value: The p-value gives the fraction of training data with an MD greater than or equal to the one for the given sample, assuming normally distributed data. The smaller the p-value, the less trustworthy the prediction. For highly non-normal X properties (e.g., fingerprints), the MD p-value is wildly inaccurate.

### Structural Similar Compounds

| Name               | METHANE;TRIS(4-AMINOPHENYL)-                                                        | ANTHRAQUINONE; 1-((2-HYDROXYETHYL)AMINO)-4-(METHYLAMINO)-                           | BENZOIN; OXIME                                                                      |
|--------------------|-------------------------------------------------------------------------------------|-------------------------------------------------------------------------------------|-------------------------------------------------------------------------------------|
| Structure          | 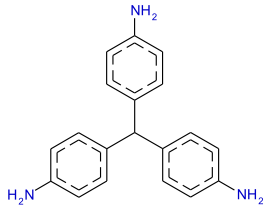 |  |  |
| Actual Endpoint    | Moderate_Severe                                                                     | Mild                                                                                | Mild                                                                                |
| Predicted Endpoint | Moderate_Severe                                                                     | Mild                                                                                | Mild                                                                                |
| Distance           | 0.565                                                                               | 0.653                                                                               | 0.680                                                                               |
| Reference          | 28ZPAK-;73;72                                                                       | 28ZPAK 245;72                                                                       | 28ZPAK-;111;72                                                                      |

### Model Applicability

Unknown features are fingerprint features in the query molecule, but not found or appearing too infrequently in the training set.

1. All properties and OPS components are within expected ranges.

### Feature Contribution

#### Top features for positive contribution

| Fingerprint | Bit/Smiles | Feature Structure                                                                                                                                      | Score | Moderate_Severe in training set |
|-------------|------------|--------------------------------------------------------------------------------------------------------------------------------------------------------|-------|---------------------------------|
| FCFP_10     | -497728148 | <p>AND Enantiomer</p> 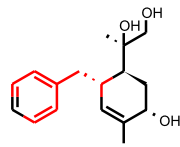 <p>[*]CC[c]1:[cH]:[cH]:[*]:[cH]:[cH]:1</p> | 0.356 | 24 out of 25                    |



|                                        |             |                                                                                                                                                                  |        |                                    |
|----------------------------------------|-------------|------------------------------------------------------------------------------------------------------------------------------------------------------------------|--------|------------------------------------|
| FCFP_10                                | -1272709286 | <p>AND Enantiomer</p> 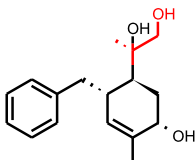 <p>[*][C@H]1[*][*]NC1</p>                              | 0.285  | 234 out of 266                     |
| FCFP_10                                | 1070061035  | <p>AND Enantiomer</p>  <p>[*]C([*])O</p>                                      | 0.239  | 284 out of 338                     |
| Top Features for negative contribution |             |                                                                                                                                                                  |        |                                    |
| Fingerprint                            | Bit/Smiles  | Feature Structure                                                                                                                                                | Score  | Moderate_Severe<br>in training set |
| FCFP_10                                | -2097085266 | <p>AND Enantiomer</p>  <p>[*]C([*])(C@@)(C(O)C)C</p>                          | -0.507 | 0 out of 1                         |
| FCFP_10                                | -255810400  | <p>AND Enantiomer</p>  <p>[*]C[C@@H](C([*])([*])<br/>[C@@](C(O)CO</p>       | -0.507 | 0 out of 1                         |
| FCFP_10                                | -1698724694 | <p>AND Enantiomer</p>  <p>[*]C([*])[c]1:[cH]:[c<br/>H]:[cH]:[cH]:[cH]:1</p> | -0.284 | 53 out of 107                      |

# Simeprevir

# TOPKAT\_Ocular\_Irritancy\_Mild\_vs\_Moderate\_Severe

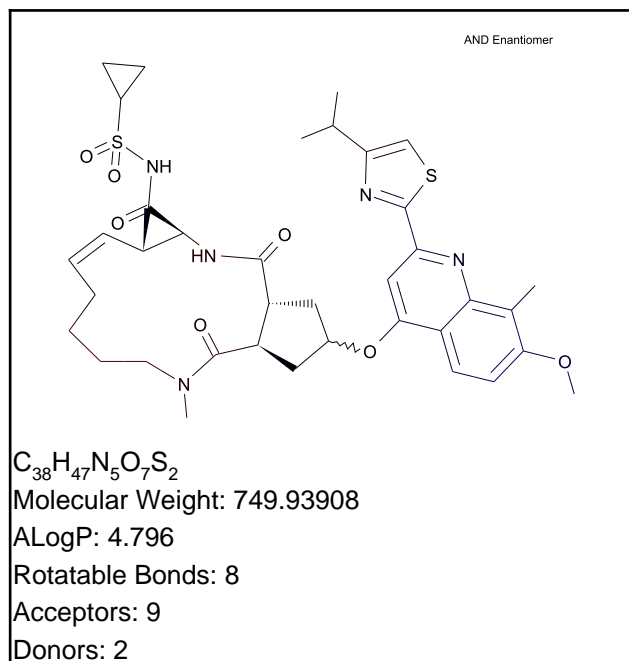

## Model Prediction

Prediction: Mild

Probability: 0.777

Enrichment: 1.13

Bayesian Score: -1.77

Mahalanobis Distance: 17.1

Mahalanobis Distance p-value: 9.62e-022

Prediction: Positive if the Bayesian score is above the estimated best cutoff value from minimizing the false positive and false negative rate.

Probability: The estimated probability that the sample is in the positive category. This assumes that the Bayesian score follows a normal distribution and is different from the prediction using a cutoff.

Enrichment: An estimate of enrichment, that is, the increased likelihood (versus random) of this sample being in the category.

Bayesian Score: The standard Laplacian-modified Bayesian score.

Mahalanobis Distance: The Mahalanobis distance (MD) is the distance to the center of the training data. The larger the MD, the less trustworthy the prediction.

Mahalanobis Distance p-value: The p-value gives the fraction of training data with an MD greater than or equal to the one for the given sample, assuming normally distributed data. The smaller the p-value, the less trustworthy the prediction. For highly non-normal X properties (e.g., fingerprints), the MD p-value is wildly inaccurate.

## Structural Similar Compounds

| Name               | Anthraquinone; 1;1'-(anthraquinon-1;5-ylenediimino)di-                              | Anthraquinone; 1;1'-(anthraquinon-1;4-ylenediimino)di-                              | 4;4'-DIAMINO-1;1'-DIANTHRIMIDE                                                      |
|--------------------|-------------------------------------------------------------------------------------|-------------------------------------------------------------------------------------|-------------------------------------------------------------------------------------|
| Structure          | 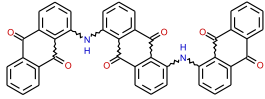 |  |  |
| Actual Endpoint    | Mild                                                                                | Mild                                                                                | Mild                                                                                |
| Predicted Endpoint | Mild                                                                                | Mild                                                                                | Mild                                                                                |
| Distance           | 0.875                                                                               | 0.875                                                                               | 1.102                                                                               |
| Reference          | Prehled Prumyslove Toxikologie; Organicke Latky; Marhold; J. pp 736;86              | Prehled Prumyslove Toxikologie; Organicke Latky; Marhold; J. pp 736;86              | 28ZPAK-;125;72                                                                      |

## Model Applicability

Unknown features are fingerprint features in the query molecule, but not found or appearing too infrequently in the training set.

- OPS PC15 out of range. Value: 5.5683. Training min, max, SD, explained variance: -4.4073, 5.1625, 1.138, 0.0158.

## Feature Contribution

| Top features for positive contribution |             |                                                                                                                                                         |       |                                 |
|----------------------------------------|-------------|---------------------------------------------------------------------------------------------------------------------------------------------------------|-------|---------------------------------|
| Fingerprint                            | Bit/Smiles  | Feature Structure                                                                                                                                       | Score | Moderate_Severe in training set |
| FCFP_10                                | -2015019763 | <p>AND Enantiomer</p> 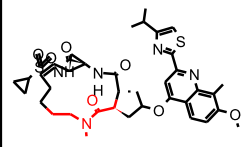 <p><chem>[*]CCN(C)C(=O)C([*])[*]</chem></p> | 0.294 | 3 out of 3                      |

|                                        |             |                                                                                                                                                    |        |                                 |
|----------------------------------------|-------------|----------------------------------------------------------------------------------------------------------------------------------------------------|--------|---------------------------------|
| FCFP_10                                | -1474971978 | <p>AND Enantiomer</p> 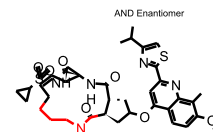 <p>[*]CCCN(C)C(=[*])[*]</p>              | 0.259  | 14 out of 16                    |
| FCFP_10                                | -124655670  | <p>AND Enantiomer</p>  <p>[*][c]1:[*]:[*]:s:[cH]:1</p>          | 0.259  | 14 out of 16                    |
| Top Features for negative contribution |             |                                                                                                                                                    |        |                                 |
| Fingerprint                            | Bit/Smiles  | Feature Structure                                                                                                                                  | Score  | Moderate_Severe in training set |
| FCFP_10                                | -1977641857 | <p>AND Enantiomer</p>  <p>[*][c](:[*]):[c](OC):[cH]:[*]</p>     | -0.78  | 4 out of 15                     |
| FCFP_10                                | -528918648  | <p>AND Enantiomer</p>  <p>[*]C/C=C/[C@@H]1CC1([*])[*]</p>      | -0.651 | 4 out of 13                     |
| FCFP_10                                | 690481386   | <p>AND Enantiomer</p>  <p>[*]:[c](:[*])[c]1:n:[*]:[*]:s:1</p> | -0.6   | 1 out of 4                      |

AND Enantiomer

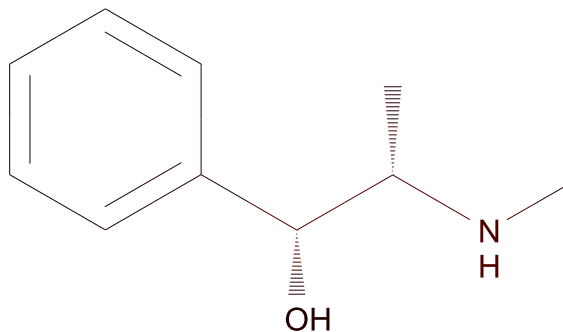C<sub>10</sub>H<sub>15</sub>NO

Molecular Weight: 165.232

ALogP: 1.234

Rotatable Bonds: 3

Acceptors: 2

Donors: 2

## Model Prediction

Prediction: Severe

Probability: 0.779

Enrichment: 1.26

Bayesian Score: 2.84

Mahalanobis Distance: 4.78

Mahalanobis Distance p-value: 1

Prediction: Positive if the Bayesian score is above the estimated best cutoff value from minimizing the false positive and false negative rate.

Probability: The estimated probability that the sample is in the positive category. This assumes that the Bayesian score follows a normal distribution and is different from the prediction using a cutoff.

Enrichment: An estimate of enrichment, that is, the increased likelihood (versus random) of this sample being in the category.

Bayesian Score: The standard Laplacian-modified Bayesian score.

Mahalanobis Distance: The Mahalanobis distance (MD) is the distance to the center of the training data. The larger the MD, the less trustworthy the prediction.

Mahalanobis Distance p-value: The p-value gives the fraction of training data with an MD greater than or equal to the one for the given sample, assuming normally distributed data. The smaller the p-value, the less trustworthy the prediction. For highly non-normal X properties (e.g., fingerprints), the MD p-value is wildly inaccurate.

## Structural Similar Compounds

| Name               | ETHANOL;2-(PHENETHYLAMINO)- | O-TOLUIDINO-ETHANOL | Ethanol; 2-anilino-                                                   |
|--------------------|-----------------------------|---------------------|-----------------------------------------------------------------------|
| Structure          |                             |                     |                                                                       |
| Actual Endpoint    | Severe                      | Severe              | Moderate                                                              |
| Predicted Endpoint | Severe                      | Moderate            | Moderate                                                              |
| Distance           | 0.420                       | 0.449               | 0.493                                                                 |
| Reference          | AMIHBC 10;61;54             | JIHTAB 31;60;49     | Prehled Prumyslove Toxikologie; Organicke Latky; Marhold; J. -;691;86 |

## Model Applicability

Unknown features are fingerprint features in the query molecule, but not found or appearing too infrequently in the training set.

1. All properties and OPS components are within expected ranges.

## Feature Contribution

### Top features for positive contribution

| Fingerprint | Bit/Smiles  | Feature Structure                                           | Score | Severe in training set |
|-------------|-------------|-------------------------------------------------------------|-------|------------------------|
| SCFP_12     | -1430588017 | <p>AND Enantiomer</p> <p>[*]N[C@@H](C)[C@H](O)[*]<br/>]</p> | 0.469 | 21 out of 21           |

|                                        |            |                                                                                                                                                     |         |                        |
|----------------------------------------|------------|-----------------------------------------------------------------------------------------------------------------------------------------------------|---------|------------------------|
| SCFP_12                                | 5          | <p>AND Enantiomer</p> 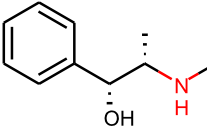 <p>[*]N[*]</p>                            | 0.337   | 129 out of 151         |
| SCFP_12                                | 1702724181 | <p>AND Enantiomer</p>  <p>[*]C([*])[C@H](O)[c]([*])[*]</p>       | 0.303   | 2 out of 2             |
| Top Features for negative contribution |            |                                                                                                                                                     |         |                        |
| Fingerprint                            | Bit/Smiles | Feature Structure                                                                                                                                   | Score   | Severe in training set |
| SCFP_12                                | 1653911926 | <p>AND Enantiomer</p>  <p>[*][c]1:[cH]:[cH]:[cH]:[cH]:[cH]:1</p> | -0.0644 | 33 out of 58           |
| SCFP_12                                | 0          | <p>AND Enantiomer</p>  <p>[*]C([*])[*]</p>                     | 0       | 463 out of 727         |
| SCFP_12                                | 3          | <p>AND Enantiomer</p>  <p>[*][c](:[*]):[*]</p>                 | 0       | 162 out of 280         |

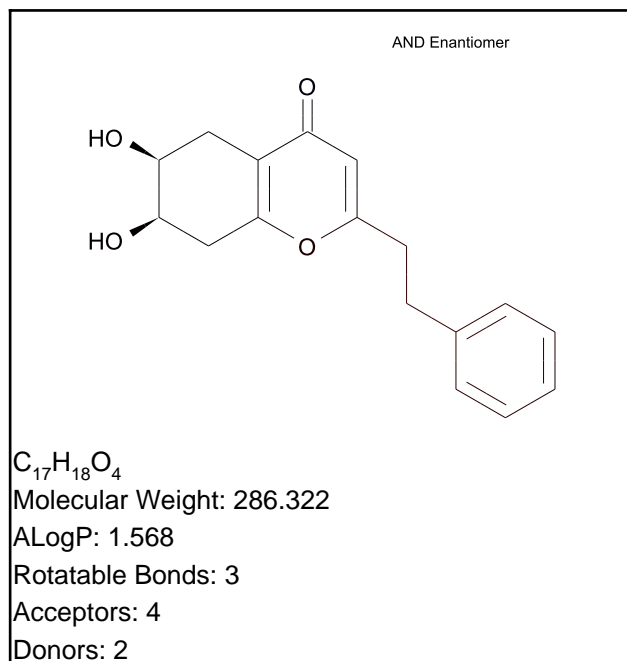

## Model Prediction

Prediction: Severe

Probability: 0.718

Enrichment: 1.16

Bayesian Score: 0.89

Mahalanobis Distance: 10.2

Mahalanobis Distance p-value: 0.0253

Prediction: Positive if the Bayesian score is above the estimated best cutoff value from minimizing the false positive and false negative rate.

Probability: The estimated probability that the sample is in the positive category. This assumes that the Bayesian score follows a normal distribution and is different from the prediction using a cutoff.

Enrichment: An estimate of enrichment, that is, the increased likelihood (versus random) of this sample being in the category.

Bayesian Score: The standard Laplacian-modified Bayesian score.

Mahalanobis Distance: The Mahalanobis distance (MD) is the distance to the center of the training data. The larger the MD, the less trustworthy the prediction.

Mahalanobis Distance p-value: The p-value gives the fraction of training data with an MD greater than or equal to the one for the given sample, assuming normally distributed data. The smaller the p-value, the less trustworthy the prediction. For highly non-normal X properties (e.g., fingerprints), the MD p-value is wildly inaccurate.

## Structural Similar Compounds

| Name               | 2-BIPHENYLCARBOXYLIC ACID; 2'-HYDROXYMETHYL-                                        | 1:2-ETHANEDIOL;2:4-DICHLOROPHENOXY-                                                 | o-Toluidine; N,N-bis(2-hydroxyethyl)-                                               |
|--------------------|-------------------------------------------------------------------------------------|-------------------------------------------------------------------------------------|-------------------------------------------------------------------------------------|
| Structure          | 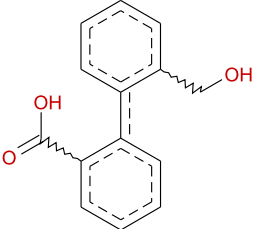 |  |  |
| Actual Endpoint    | Moderate                                                                            | Severe                                                                              | Severe                                                                              |
| Predicted Endpoint | Moderate                                                                            | Severe                                                                              | Moderate                                                                            |
| Distance           | 0.594                                                                               | 0.633                                                                               | 0.649                                                                               |
| Reference          | IHFCA 6;1;67                                                                        | AMHBC 4;119;51                                                                      | Prehled Prumyslove Toxikologie; Organicke Latky; Marhold; J. -;697;86               |

## Model Applicability

Unknown features are fingerprint features in the query molecule, but not found or appearing too infrequently in the training set.

1. All properties and OPS components are within expected ranges.

## Feature Contribution

### Top features for positive contribution

| Fingerprint | Bit/Smiles  | Feature Structure                                                                                                                          | Score | Severe in training set |
|-------------|-------------|--------------------------------------------------------------------------------------------------------------------------------------------|-------|------------------------|
| SCFP_12     | -1640858361 | 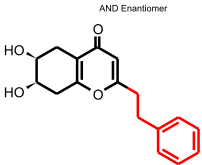<br><chem>[*]CC[c]1:[cH]:[cH]:[cH]:[cH]:[cH]:1</chem> | 0.376 | 4 out of 4             |

|                                        |             |                                                                                                                                         |         |                        |
|----------------------------------------|-------------|-----------------------------------------------------------------------------------------------------------------------------------------|---------|------------------------|
| SCFP_12                                | 2019034095  | <p>AND Enantiomer</p> 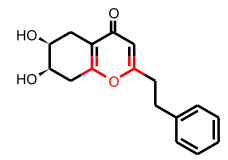 <p>[*]C(=[*])OC(=[*])[*]</p>  | 0.345   | 15 out of 17           |
| SCFP_12                                | -1272709286 | <p>AND Enantiomer</p>  <p>[*]CC[c](:[*]):[*]</p>     | 0.231   | 24 out of 31           |
| Top Features for negative contribution |             |                                                                                                                                         |         |                        |
| Fingerprint                            | Bit/Smiles  | Feature Structure                                                                                                                       | Score   | Severe in training set |
| SCFP_12                                | 13          | <p>AND Enantiomer</p>  <p>[*]=O</p>                  | -0.105  | 185 out of 338         |
| SCFP_12                                | -1980361709 | <p>AND Enantiomer</p>  <p>[*]C(=[*])C(=O)C=[*]</p> | -0.103  | 1 out of 2             |
| SCFP_12                                | 1311071855  | <p>AND Enantiomer</p>  <p>[*]C(=O)[*]</p>          | -0.0866 | 146 out of 262         |

AND Enantiomer

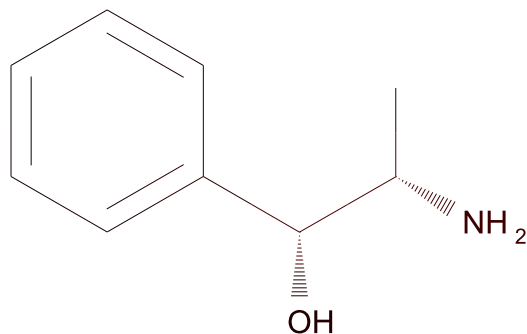 $C_9H_{13}NO$ 

Molecular Weight: 151.206

ALogP: 0.802

Rotatable Bonds: 2

Acceptors: 2

Donors: 2

## Model Prediction

Prediction: Severe

Probability: 0.746

Enrichment: 1.2

Bayesian Score: 1.95

Mahalanobis Distance: 4.82

Mahalanobis Distance p-value: 1

Prediction: Positive if the Bayesian score is above the estimated best cutoff value from minimizing the false positive and false negative rate.

Probability: The estimated probability that the sample is in the positive category. This assumes that the Bayesian score follows a normal distribution and is different from the prediction using a cutoff.

Enrichment: An estimate of enrichment, that is, the increased likelihood (versus random) of this sample being in the category.

Bayesian Score: The standard Laplacian-modified Bayesian score.

Mahalanobis Distance: The Mahalanobis distance (MD) is the distance to the center of the training data. The larger the MD, the less trustworthy the prediction.

Mahalanobis Distance p-value: The p-value gives the fraction of training data with an MD greater than or equal to the one for the given sample, assuming normally distributed data. The smaller the p-value, the less trustworthy the prediction. For highly non-normal X properties (e.g., fingerprints), the MD p-value is wildly inaccurate.

## Structural Similar Compounds

| Name               | METHYLAMINE;M-PHENYLENEBIS- | METHYLAMINE;P-PHENYLENEBIS- | 1;2-DIMETHYL;1;3-BUTANEDIOL |
|--------------------|-----------------------------|-----------------------------|-----------------------------|
| Structure          |                             |                             |                             |
| Actual Endpoint    | Severe                      | Severe                      | Moderate                    |
| Predicted Endpoint | Severe                      | Severe                      | Severe                      |
| Distance           | 0.476                       | 0.484                       | 0.494                       |
| Reference          | 28ZPAK-;64;72               | 28ZPAK-;64;72               | AIHAAP 23;95;62             |

## Model Applicability

Unknown features are fingerprint features in the query molecule, but not found or appearing too infrequently in the training set.

1. All properties and OPS components are within expected ranges.

## Feature Contribution

### Top features for positive contribution

| Fingerprint | Bit/Smiles  | Feature Structure                                  | Score | Severe in training set |
|-------------|-------------|----------------------------------------------------|-------|------------------------|
| SCFP_12     | -1430588017 | <p>AND Enantiomer</p> <p>[*]N[C@@H](C)C(=O)[*]</p> | 0.469 | 21 out of 21           |



|                                        |            |                                                                                                                                                     |         |                        |
|----------------------------------------|------------|-----------------------------------------------------------------------------------------------------------------------------------------------------|---------|------------------------|
| SCFP_12                                | 260714409  | <p>AND Enantiomer</p> 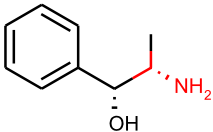 <p>[*]C([*])N</p>                         | 0.409   | 49 out of 53           |
| SCFP_12                                | 5          | <p>AND Enantiomer</p>  <p>[*]N[*]</p>                            | 0.337   | 129 out of 151         |
| Top Features for negative contribution |            |                                                                                                                                                     |         |                        |
| Fingerprint                            | Bit/Smiles | Feature Structure                                                                                                                                   | Score   | Severe in training set |
| SCFP_12                                | 1653911926 | <p>AND Enantiomer</p>  <p>[*][c]1:[cH]:[cH]:[cH]:[cH]:[cH]:1</p> | -0.0644 | 33 out of 58           |
| SCFP_12                                | 496409612  | <p>AND Enantiomer</p>  <p>[*][c](:[*]):[cH]:[cH]:[*]</p>       | 0       | 158 out of 272         |
| SCFP_12                                | 136597326  | <p>AND Enantiomer</p>  <p>[*]C([*])C</p>                       | 0       | 236 out of 373         |

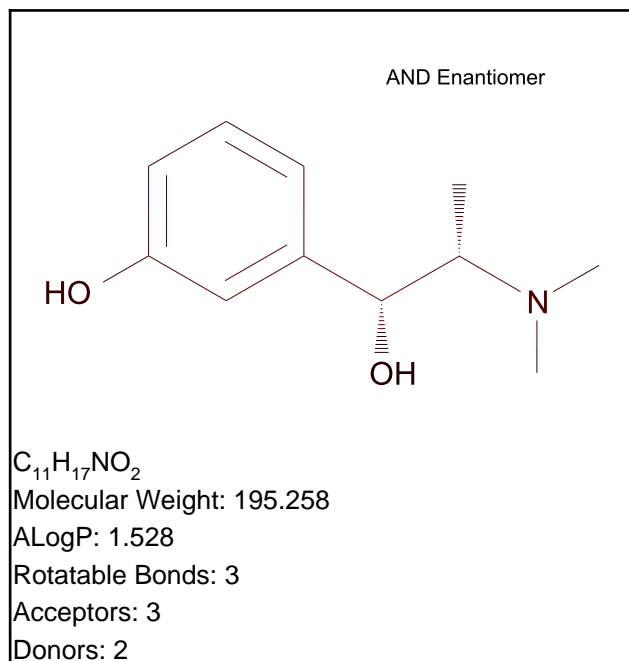

## Model Prediction

Prediction: Severe

Probability: 0.809

Enrichment: 1.3

Bayesian Score: 3.7

Mahalanobis Distance: 4.73

Mahalanobis Distance p-value: 1

Prediction: Positive if the Bayesian score is above the estimated best cutoff value from minimizing the false positive and false negative rate.

Probability: The estimated probability that the sample is in the positive category. This assumes that the Bayesian score follows a normal distribution and is different from the prediction using a cutoff.

Enrichment: An estimate of enrichment, that is, the increased likelihood (versus random) of this sample being in the category.

Bayesian Score: The standard Laplacian-modified Bayesian score.

Mahalanobis Distance: The Mahalanobis distance (MD) is the distance to the center of the training data. The larger the MD, the less trustworthy the prediction.

Mahalanobis Distance p-value: The p-value gives the fraction of training data with an MD greater than or equal to the one for the given sample, assuming normally distributed data. The smaller the p-value, the less trustworthy the prediction. For highly non-normal X properties (e.g., fingerprints), the MD p-value is wildly inaccurate.

## Structural Similar Compounds

| Name               | o-Toluidine; N,N-bis(2-hydroxyethyl)-                                 | ETHANOL; 2,2'-(CYCLOHEXYLIMINO)DI- | ETHANOL; 2,2'-(PHENYLIMINO)DI- |
|--------------------|-----------------------------------------------------------------------|------------------------------------|--------------------------------|
| Structure          |                                                                       |                                    |                                |
| Actual Endpoint    | Severe                                                                | Severe                             | Severe                         |
| Predicted Endpoint | Moderate                                                              | Severe                             | Moderate                       |
| Distance           | 0.476                                                                 | 0.509                              | 0.531                          |
| Reference          | Prehled Prumyslove Toxikologie; Organicke Latky; Marhold; J. -:697;86 | 34ZIAG 61;69                       | UCDS** 6/13/60                 |

## Model Applicability

Unknown features are fingerprint features in the query molecule, but not found or appearing too infrequently in the training set.

1. All properties and OPS components are within expected ranges.

## Feature Contribution

| Top features for positive contribution |             |                                                                                                                   |       |                        |
|----------------------------------------|-------------|-------------------------------------------------------------------------------------------------------------------|-------|------------------------|
| Fingerprint                            | Bit/Smiles  | Feature Structure                                                                                                 | Score | Severe in training set |
| SCFP_12                                | -1430588017 | <p style="text-align: center;">AND Enantiomer</p> <p style="text-align: center;">[*]N[C@@H](C)C([*])[*]<br/>}</p> | 0.469 | 21 out of 21           |

|                                        |             |                                                                                                                                                                 |       |                        |
|----------------------------------------|-------------|-----------------------------------------------------------------------------------------------------------------------------------------------------------------|-------|------------------------|
| SCFP_12                                | 125999298   | <p>AND Enantiomer</p> 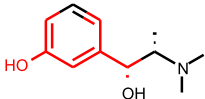 <p>[*]C([*])[c]1:[cH]:[*]<br/>:[cH]:[c](O):[cH]:1</p> | 0.42  | 7 out of 7             |
| SCFP_12                                | 5           | <p>AND Enantiomer</p>  <p>[*]N[*]</p>                                        | 0.337 | 129 out of 151         |
| Top Features for negative contribution |             |                                                                                                                                                                 |       |                        |
| Fingerprint                            | Bit/Smiles  | Feature Structure                                                                                                                                               | Score | Severe in training set |
| SCFP_12                                | -1379591900 | <p>AND Enantiomer</p>  <p>[*][c]1:[*]:[cH]:[cH]<br/>:[cH]:[cH]:1</p>         | 0     | 77 out of 130          |
| SCFP_12                                | -424425761  | <p>AND Enantiomer</p>  <p>[*]:[c](:[*])O</p>                               | 0     | 40 out of 63           |
| SCFP_12                                | 560173167   | <p>AND Enantiomer</p>  <p>[*]:[cH]:[c](O):[cH]:<br/>[*]</p>                | 0     | 68 out of 110          |

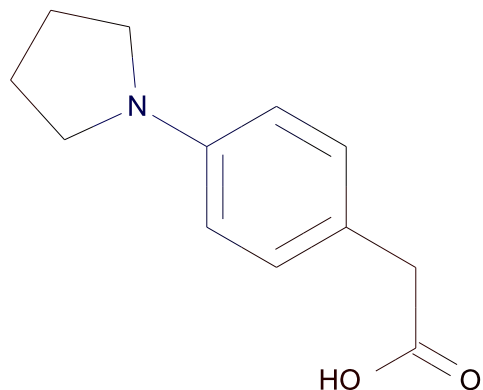

$C_{12}H_{15}NO_2$

Molecular Weight: 205.253

ALogP: 2.117

Rotatable Bonds: 3

Acceptors: 3

Donors: 1

## Model Prediction

Prediction: Severe

Probability: 0.682

Enrichment: 1.1

Bayesian Score: -0.266

Mahalanobis Distance: 6.53

Mahalanobis Distance p-value: 0.999

Prediction: Positive if the Bayesian score is above the estimated best cutoff value from minimizing the false positive and false negative rate.

Probability: The estimated probability that the sample is in the positive category. This assumes that the Bayesian score follows a normal distribution and is different from the prediction using a cutoff.

Enrichment: An estimate of enrichment, that is, the increased likelihood (versus random) of this sample being in the category.

Bayesian Score: The standard Laplacian-modified Bayesian score.

Mahalanobis Distance: The Mahalanobis distance (MD) is the distance to the center of the training data. The larger the MD, the less trustworthy the prediction.

Mahalanobis Distance p-value: The p-value gives the fraction of training data with an MD greater than or equal to the one for the given sample, assuming normally distributed data. The smaller the p-value, the less trustworthy the prediction. For highly non-normal X properties (e.g., fingerprints), the MD p-value is wildly inaccurate.

## Structural Similar Compounds

| Name               | MANDELIC ACID; ISOPROPYL ESTER | 1-NAPHTHALENEACETIC ACID | MANDELIC ACID; ETHYL ESTER |
|--------------------|--------------------------------|--------------------------|----------------------------|
| Structure          |                                |                          |                            |
| Actual Endpoint    | Moderate                       | Severe                   | Moderate                   |
| Predicted Endpoint | Moderate                       | Severe                   | Moderate                   |
| Distance           | 0.481                          | 0.485                    | 0.534                      |
| Reference          | AJOPAA 29;1363;46              | PESTC* 9;10;80           | AJOPAA 29;1363;46          |

## Model Applicability

Unknown features are fingerprint features in the query molecule, but not found or appearing too infrequently in the training set.

1. All properties and OPS components are within expected ranges.

## Feature Contribution

### Top features for positive contribution

| Fingerprint | Bit/Smiles | Feature Structure                                         | Score | Severe in training set |
|-------------|------------|-----------------------------------------------------------|-------|------------------------|
| SCFP_12     | -658389839 | <br><chem>*[c]1:[cH]:[cH]:[c]:([cH]:[cH]:1)N2CCCC2</chem> | 0.303 | 2 out of 2             |

| SCFP_12                                | -2056996303 | 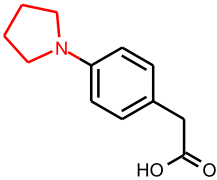<br><chem>[*]N1CCCC1</chem>                                   | 0.303  | 2 out of 2             |
|----------------------------------------|-------------|--------------------------------------------------------------------------------------------------------------------------------------------------|--------|------------------------|
| SCFP_12                                | -424485343  | <br><chem>[*]C(=[*])O</chem>                                  | 0.263  | 43 out of 54           |
| Top Features for negative contribution |             |                                                                                                                                                  |        |                        |
| Fingerprint                            | Bit/Smiles  | Feature Structure                                                                                                                                | Score  | Severe in training set |
| SCFP_12                                | 1334669481  | <br><chem>[*]N([*])[c](:[cH]:[*]):[cH]:[*]</chem>             | -0.685 | 28 out of 93           |
| SCFP_12                                | -1380909229 | <br><chem>[*]N([*])[c]1:[cH]:[*]:[c]([*]):[cH]:[cH]:1</chem> | -0.506 | 26 out of 72           |
| SCFP_12                                | 10          | <br><chem>[*]N([*])[*]</chem>                               | -0.451 | 43 out of 112          |

AND Enantiomer

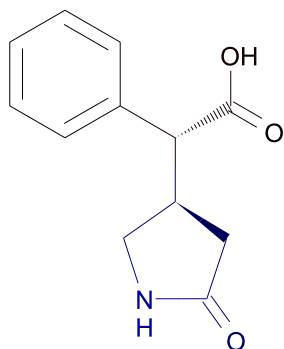C<sub>12</sub>H<sub>13</sub>NO<sub>3</sub>

Molecular Weight: 219.237

ALogP: 0.621

Rotatable Bonds: 3

Acceptors: 3

Donors: 2

## Model Prediction

Prediction: Moderate

Probability: 0.549

Enrichment: 0.886

Bayesian Score: -3.24

Mahalanobis Distance: 11.6

Mahalanobis Distance p-value: 0.000134

Prediction: Positive if the Bayesian score is above the estimated best cutoff value from minimizing the false positive and false negative rate.

Probability: The estimated probability that the sample is in the positive category. This assumes that the Bayesian score follows a normal distribution and is different from the prediction using a cutoff.

Enrichment: An estimate of enrichment, that is, the increased likelihood (versus random) of this sample being in the category.

Bayesian Score: The standard Laplacian-modified Bayesian score.

Mahalanobis Distance: The Mahalanobis distance (MD) is the distance to the center of the training data. The larger the MD, the less trustworthy the prediction.

Mahalanobis Distance p-value: The p-value gives the fraction of training data with an MD greater than or equal to the one for the given sample, assuming normally distributed data. The smaller the p-value, the less trustworthy the prediction. For highly non-normal X properties (e.g., fingerprints), the MD p-value is wildly inaccurate.

## Structural Similar Compounds

| Name               | Anthranilic acid; N-methyl-                                           | ACETANILIDE. 4'-AMINO- | ETHANOL; 2;2'-(PHENYLIMINO)DI- |
|--------------------|-----------------------------------------------------------------------|------------------------|--------------------------------|
| Structure          |                                                                       |                        |                                |
| Actual Endpoint    | Moderate                                                              | Moderate               | Severe                         |
| Predicted Endpoint | Moderate                                                              | Moderate               | Moderate                       |
| Distance           | 0.557                                                                 | 0.596                  | 0.609                          |
| Reference          | Prehled Prumyslove Toxikologie; Organicke Latky; Marhold; J. -;741;86 | 28ZPAK-;130;72         | UCDS** 6/13/60                 |

## Model Applicability

Unknown features are fingerprint features in the query molecule, but not found or appearing too infrequently in the training set.

1. All properties and OPS components are within expected ranges.

## Feature Contribution

### Top features for positive contribution

| Fingerprint | Bit/Smiles | Feature Structure                        | Score | Severe in training set |
|-------------|------------|------------------------------------------|-------|------------------------|
| SCFP_12     | -424485343 | <p>AND Enantiomer</p> <p>[*]C(=[*])O</p> | 0.263 | 43 out of 54           |

|                                        |             |                                                                                                                                                           |        |                        |
|----------------------------------------|-------------|-----------------------------------------------------------------------------------------------------------------------------------------------------------|--------|------------------------|
| SCFP_12                                | -1631132401 | <p>AND Enantiomer</p> 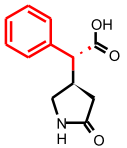 <p>[*]C([*])[c]1:[cH]:[cH]:[cH]:[cH]:[cH]:1</p> | 0.104  | 19 out of 28           |
| SCFP_12                                | 2109165795  | <p>AND Enantiomer</p>  <p>[*]C([*])[c](:[cH]:[*]):[cH]:[*]</p>         | 0.0868 | 79 out of 119          |
| Top Features for negative contribution |             |                                                                                                                                                           |        |                        |
| Fingerprint                            | Bit/Smiles  | Feature Structure                                                                                                                                         | Score  | Severe in training set |
| SCFP_12                                | 2005026407  | <p>AND Enantiomer</p>  <p>[*][C@@H]1CNC(=O)C1</p>                      | -0.796 | 0 out of 2             |
| SCFP_12                                | -587569116  | <p>AND Enantiomer</p>  <p>[*][C@H]1[*][*]NC1</p>                     | -0.619 | 11 out of 35           |
| SCFP_12                                | 1256995004  | <p>AND Enantiomer</p>  <p>O=C1C[*][*]N1</p>                          | -0.483 | 12 out of 33           |

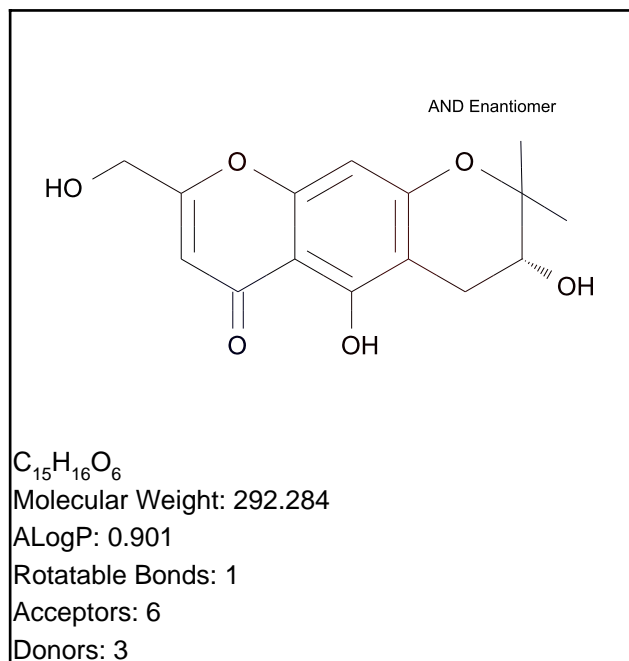

## Model Prediction

Prediction: Moderate

Probability: 0.654

Enrichment: 1.05

Bayesian Score: -1.03

Mahalanobis Distance: 10.2

Mahalanobis Distance p-value: 0.0213

Prediction: Positive if the Bayesian score is above the estimated best cutoff value from minimizing the false positive and false negative rate.

Probability: The estimated probability that the sample is in the positive category. This assumes that the Bayesian score follows a normal distribution and is different from the prediction using a cutoff.

Enrichment: An estimate of enrichment, that is, the increased likelihood (versus random) of this sample being in the category.

Bayesian Score: The standard Laplacian-modified Bayesian score.

Mahalanobis Distance: The Mahalanobis distance (MD) is the distance to the center of the training data. The larger the MD, the less trustworthy the prediction.

Mahalanobis Distance p-value: The p-value gives the fraction of training data with an MD greater than or equal to the one for the given sample, assuming normally distributed data. The smaller the p-value, the less trustworthy the prediction. For highly non-normal X properties (e.g., fingerprints), the MD p-value is wildly inaccurate.

## Structural Similar Compounds

| Name               | p-Acetophenetidine; 3'-(bis(2-hydroxyethyl)amino)-                    | O-TOLUENESULFONAMIDE; 4-AMINO-N-(2-HYDROXYETHYL)- | 2-NAPHTHALENESULFONIC ACID;5-AMINO-6-ETHOXY- |
|--------------------|-----------------------------------------------------------------------|---------------------------------------------------|----------------------------------------------|
| Structure          |                                                                       |                                                   |                                              |
| Actual Endpoint    | Moderate                                                              | Moderate                                          | Moderate                                     |
| Predicted Endpoint | Moderate                                                              | Moderate                                          | Moderate                                     |
| Distance           | 0.694                                                                 | 0.745                                             | 0.746                                        |
| Reference          | Prehled Prumyslove Toxikologie; Organické Latky; Marhold; J. -;645;86 | 28ZPAK-;200;72                                    | 28ZPAK-;191;72                               |

## Model Applicability

Unknown features are fingerprint features in the query molecule, but not found or appearing too infrequently in the training set.

1. All properties and OPS components are within expected ranges.

## Feature Contribution

### Top features for positive contribution

| Fingerprint | Bit/Smiles | Feature Structure                                                                       | Score | Severe in training set |
|-------------|------------|-----------------------------------------------------------------------------------------|-------|------------------------|
| SCFP_12     | 130348166  | <p>AND Enantiomer</p> <p><chem>[*]O[c]1:[cH]:[c](O[*]):[c]([*]):[*]:[c]:1[*]</chem></p> | 0.376 | 4 out of 4             |



|                                        |             |                                                                                                                                                              |        |                        |
|----------------------------------------|-------------|--------------------------------------------------------------------------------------------------------------------------------------------------------------|--------|------------------------|
| SCFP_12                                | -1272709286 | <p>AND Enantiomer</p> 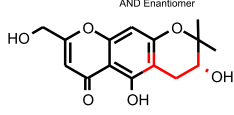 <p>[*]CC[c](:[*]):[*]</p>                          | 0.231  | 24 out of 31           |
| SCFP_12                                | 616547045   | <p>AND Enantiomer</p>  <p>[*]C\C(=C\[*])\O[*]</p>                         | 0.218  | 1 out of 1             |
| Top Features for negative contribution |             |                                                                                                                                                              |        |                        |
| Fingerprint                            | Bit/Smiles  | Feature Structure                                                                                                                                            | Score  | Severe in training set |
| SCFP_12                                | 1416196903  | <p>AND Enantiomer</p>  <p>[*]OC(C)(C)C([*])([*])</p>                      | -0.383 | 3 out of 8             |
| SCFP_12                                | -1980302127 | <p>AND Enantiomer</p>  <p>[*]=CC(=O)[c](:[*]):[*]</p>                   | -0.345 | 1 out of 3             |
| SCFP_12                                | -2056718782 | <p>AND Enantiomer</p>  <p>[*]C(=[*])[c](:[c]([*]):[*]):[c]([*]):[*]</p> | -0.163 | 20 out of 39           |

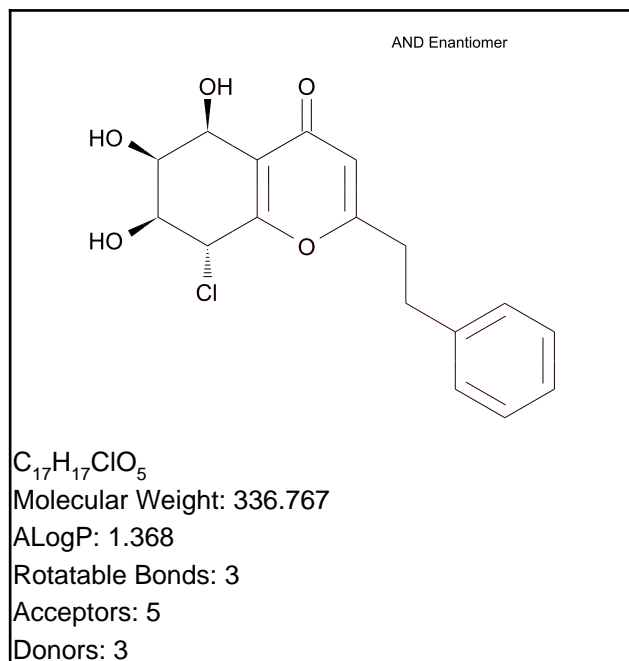

## Model Prediction

Prediction: Severe

Probability: 0.728

Enrichment: 1.17

Bayesian Score: 1.23

Mahalanobis Distance: 11.6

Mahalanobis Distance p-value: 0.000106

Prediction: Positive if the Bayesian score is above the estimated best cutoff value from minimizing the false positive and false negative rate.

Probability: The estimated probability that the sample is in the positive category. This assumes that the Bayesian score follows a normal distribution and is different from the prediction using a cutoff.

Enrichment: An estimate of enrichment, that is, the increased likelihood (versus random) of this sample being in the category.

Bayesian Score: The standard Laplacian-modified Bayesian score.

Mahalanobis Distance: The Mahalanobis distance (MD) is the distance to the center of the training data. The larger the MD, the less trustworthy the prediction.

Mahalanobis Distance p-value: The p-value gives the fraction of training data with an MD greater than or equal to the one for the given sample, assuming normally distributed data. The smaller the p-value, the less trustworthy the prediction. For highly non-normal X properties (e.g., fingerprints), the MD p-value is wildly inaccurate.

## Structural Similar Compounds

| Name               | p-Acetophenetidide; 3'-(bis(2-hydroxyethyl)amino)-                                  | METHANE;TRIS(4-AMINOPHENYL)-                                                        | 5-NORBORNENE-2;3-DICARBOXYLIC ACID; 1;4;5;6;7;7-HEXACHLORO-                         |
|--------------------|-------------------------------------------------------------------------------------|-------------------------------------------------------------------------------------|-------------------------------------------------------------------------------------|
| Structure          | 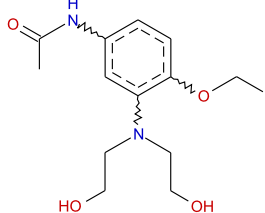 |  |  |
| Actual Endpoint    | Moderate                                                                            | Moderate                                                                            | Severe                                                                              |
| Predicted Endpoint | Moderate                                                                            | Moderate                                                                            | Severe                                                                              |
| Distance           | 0.665                                                                               | 0.730                                                                               | 0.759                                                                               |
| Reference          | Prehled Prumyslove Toxikologie; Organické Latky; Marhold; J. -;645;86               | 28ZPAK-;73;72                                                                       | 28ZPAK-;92;72                                                                       |

## Model Applicability

Unknown features are fingerprint features in the query molecule, but not found or appearing too infrequently in the training set.

1. All properties and OPS components are within expected ranges.

## Feature Contribution

### Top features for positive contribution

| Fingerprint | Bit/Smiles  | Feature Structure                                                                                                                          | Score | Severe in training set |
|-------------|-------------|--------------------------------------------------------------------------------------------------------------------------------------------|-------|------------------------|
| SCFP_12     | -1640858361 | 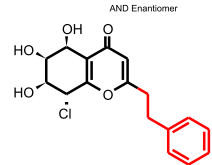<br><chem>[*]CC[c]1:[cH]:[cH]:[cH]:[cH]:[cH]:1</chem> | 0.376 | 4 out of 4             |



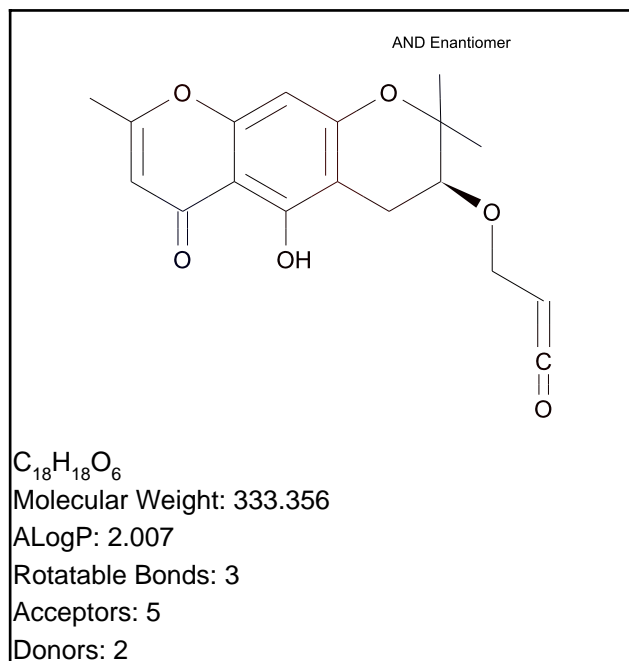

## Model Prediction

Prediction: Severe

Probability: 0.709

Enrichment: 1.14

Bayesian Score: 0.548

Mahalanobis Distance: 13

Mahalanobis Distance p-value: 4.98e-008

Prediction: Positive if the Bayesian score is above the estimated best cutoff value from minimizing the false positive and false negative rate.

Probability: The estimated probability that the sample is in the positive category. This assumes that the Bayesian score follows a normal distribution and is different from the prediction using a cutoff.

Enrichment: An estimate of enrichment, that is, the increased likelihood (versus random) of this sample being in the category.

Bayesian Score: The standard Laplacian-modified Bayesian score.

Mahalanobis Distance: The Mahalanobis distance (MD) is the distance to the center of the training data. The larger the MD, the less trustworthy the prediction.

Mahalanobis Distance p-value: The p-value gives the fraction of training data with an MD greater than or equal to the one for the given sample, assuming normally distributed data. The smaller the p-value, the less trustworthy the prediction. For highly non-normal X properties (e.g., fingerprints), the MD p-value is wildly inaccurate.

## Structural Similar Compounds

| Name               | 5-NORBORNENE-2;3-DICARBOXYLIC ACID; 1;4;5;6;7;7-HEXACHLORO-                         | 2-NAPHTHALENESULFONIC ACID;5-AMINO-6-ETHOXY-                                        | PHENOL; 4;4'-SULFONYLDI-                                                            |
|--------------------|-------------------------------------------------------------------------------------|-------------------------------------------------------------------------------------|-------------------------------------------------------------------------------------|
| Structure          | 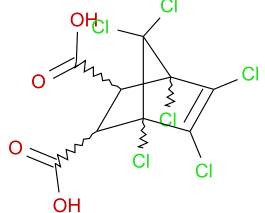 |  |  |
| Actual Endpoint    | Severe                                                                              | Moderate                                                                            | Moderate                                                                            |
| Predicted Endpoint | Severe                                                                              | Moderate                                                                            | Moderate                                                                            |
| Distance           | 0.622                                                                               | 0.676                                                                               | 0.697                                                                               |
| Reference          | 28ZPAK-;92;72                                                                       | 28ZPAK-;191;72                                                                      | BIOFX* 601-05501;74                                                                 |

## Model Applicability

Unknown features are fingerprint features in the query molecule, but not found or appearing too infrequently in the training set.

1. All properties and OPS components are within expected ranges.

## Feature Contribution

| Top features for positive contribution |            |                                                                                                                                                     |       |                        |
|----------------------------------------|------------|-----------------------------------------------------------------------------------------------------------------------------------------------------|-------|------------------------|
| Fingerprint                            | Bit/Smiles | Feature Structure                                                                                                                                   | Score | Severe in training set |
| SCFP_12                                | 130348166  | 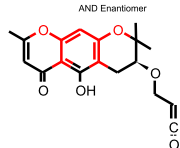<br><chem>[*]O[c]1:[cH]:[c](O)[*]:[c]([*]):[*]:[c]:1[*]</chem> | 0.376 | 4 out of 4             |

|                                        |             |                                                                                                                                                              |        |                        |
|----------------------------------------|-------------|--------------------------------------------------------------------------------------------------------------------------------------------------------------|--------|------------------------|
| SCFP_12                                | 1311101646  | <p>AND Enantiomer</p> 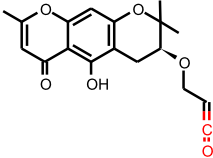 <p>[*]=C=O</p>                                     | 0.311  | 7 out of 8             |
| SCFP_12                                | -1272709286 | <p>AND Enantiomer</p>  <p>[*]CC[c](:[*]):[*]</p>                          | 0.231  | 24 out of 31           |
| Top Features for negative contribution |             |                                                                                                                                                              |        |                        |
| Fingerprint                            | Bit/Smiles  | Feature Structure                                                                                                                                            | Score  | Severe in training set |
| SCFP_12                                | 1416196903  | <p>AND Enantiomer</p>  <p>[*]OC(C)(C)C([*])([*])</p>                      | -0.383 | 3 out of 8             |
| SCFP_12                                | -1980302127 | <p>AND Enantiomer</p>  <p>[*]=CC(=O)[c](:[*]):[*]</p>                   | -0.345 | 1 out of 3             |
| SCFP_12                                | -2056718782 | <p>AND Enantiomer</p>  <p>[*]C(=[*])[c](:[c]([*])):[*]:[c]([*]):[*]</p> | -0.163 | 20 out of 39           |

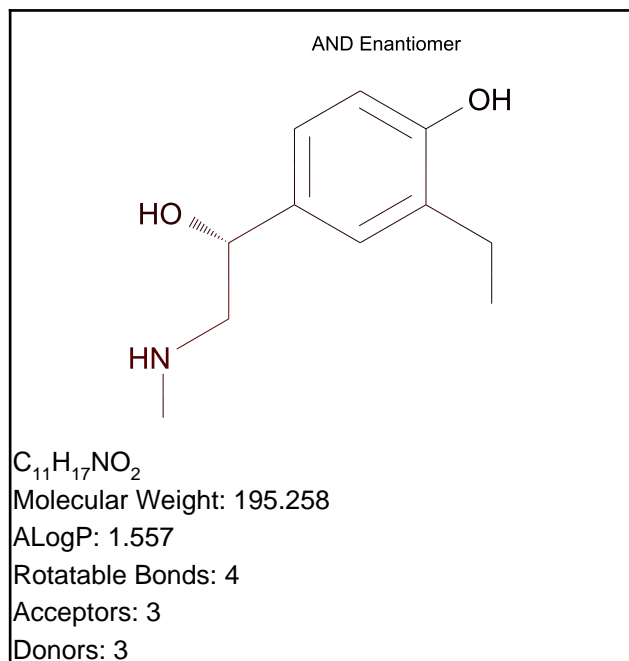

## Model Prediction

Prediction: Severe

Probability: 0.769

Enrichment: 1.24

Bayesian Score: 2.56

Mahalanobis Distance: 5.02

Mahalanobis Distance p-value: 1

Prediction: Positive if the Bayesian score is above the estimated best cutoff value from minimizing the false positive and false negative rate.

Probability: The estimated probability that the sample is in the positive category. This assumes that the Bayesian score follows a normal distribution and is different from the prediction using a cutoff.

Enrichment: An estimate of enrichment, that is, the increased likelihood (versus random) of this sample being in the category.

Bayesian Score: The standard Laplacian-modified Bayesian score.

Mahalanobis Distance: The Mahalanobis distance (MD) is the distance to the center of the training data. The larger the MD, the less trustworthy the prediction.

Mahalanobis Distance p-value: The p-value gives the fraction of training data with an MD greater than or equal to the one for the given sample, assuming normally distributed data. The smaller the p-value, the less trustworthy the prediction. For highly non-normal X properties (e.g., fingerprints), the MD p-value is wildly inaccurate.

## Structural Similar Compounds

| Name               | 2-PROPANOL; 1;1';1"-NITRILOTRI- | 1-AMINO-3-AMINOMETHYL-3;5;5-TRIMETHYLCYCLOHEXANOL | METHANE;TRIS(4-AMINOPHENYL)- |
|--------------------|---------------------------------|---------------------------------------------------|------------------------------|
| Structure          |                                 |                                                   |                              |
| Actual Endpoint    | Severe                          | Severe                                            | Moderate                     |
| Predicted Endpoint | Severe                          | Severe                                            | Moderate                     |
| Distance           | 0.651                           | 0.660                                             | 0.673                        |
| Reference          | AJOPAA 29;1363;46               | AIHAAP 30;470;69                                  | 28ZPAK-;73;72                |

## Model Applicability

Unknown features are fingerprint features in the query molecule, but not found or appearing too infrequently in the training set.

1. All properties and OPS components are within expected ranges.

## Feature Contribution

| Top features for positive contribution |            |                                                        |       |                        |
|----------------------------------------|------------|--------------------------------------------------------|-------|------------------------|
| Fingerprint                            | Bit/Smiles | Feature Structure                                      | Score | Severe in training set |
| SCFP_12                                | 696607952  | <p>AND Enantiomer</p> <p><chem>[*]C([*])CNC</chem></p> | 0.348 | 3 out of 3             |

|                                        |             |                                                                                                                                                                        |         |                        |
|----------------------------------------|-------------|------------------------------------------------------------------------------------------------------------------------------------------------------------------------|---------|------------------------|
| SCFP_12                                | 2088704928  | <p>AND Enantiomer</p> 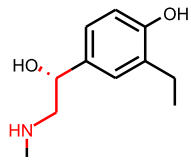 <p>[*]NCC([*])([*])</p>                                      | 0.342   | 110 out of 128         |
| SCFP_12                                | 5           | <p>AND Enantiomer</p>  <p>[*]N[*]</p>                                               | 0.337   | 129 out of 151         |
| Top Features for negative contribution |             |                                                                                                                                                                        |         |                        |
| Fingerprint                            | Bit/Smiles  | Feature Structure                                                                                                                                                      | Score   | Severe in training set |
| SCFP_12                                | -1848446841 | <p>AND Enantiomer</p>  <p>[*]C[c]1:[cH]:[c](:[cH]:[cH]:[c]:1O)C([*])([*])</p>       | -0.345  | 1 out of 3             |
| SCFP_12                                | -350503170  | <p>AND Enantiomer</p>  <p>[*]C[c]1:[cH]:[c](:[cH]:[cH]:[c]:1[*(*)])C([*])([*])</p> | -0.0702 | 9 out of 16            |
| SCFP_12                                | -496409612  | <p>AND Enantiomer</p>  <p>[*][c](:[*(*)]:[cH]:[cH]:[cH]:[cH]:[c]:1[*(*)])</p>     | 0       | 158 out of 272         |

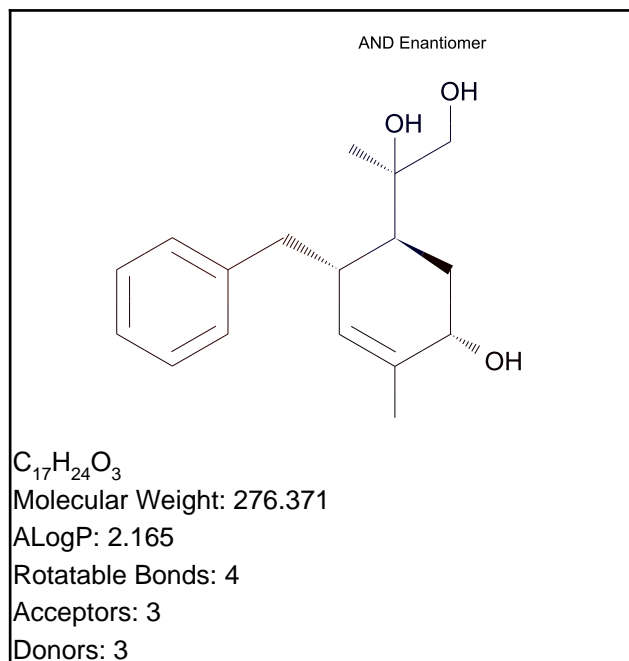

## Model Prediction

Prediction: Moderate

Probability: 0.675

Enrichment: 1.09

Bayesian Score: -0.469

Mahalanobis Distance: 11.7

Mahalanobis Distance p-value: 6.26e-005

Prediction: Positive if the Bayesian score is above the estimated best cutoff value from minimizing the false positive and false negative rate.

Probability: The estimated probability that the sample is in the positive category. This assumes that the Bayesian score follows a normal distribution and is different from the prediction using a cutoff.

Enrichment: An estimate of enrichment, that is, the increased likelihood (versus random) of this sample being in the category.

Bayesian Score: The standard Laplacian-modified Bayesian score.

Mahalanobis Distance: The Mahalanobis distance (MD) is the distance to the center of the training data. The larger the MD, the less trustworthy the prediction.

Mahalanobis Distance p-value: The p-value gives the fraction of training data with an MD greater than or equal to the one for the given sample, assuming normally distributed data. The smaller the p-value, the less trustworthy the prediction. For highly non-normal X properties (e.g., fingerprints), the MD p-value is wildly inaccurate.

## Structural Similar Compounds

| Name               | METHANE;TRIS(4-AMINOPHENYL)-                                                        | 2-BIPHENYLCARBOXYLIC ACID; 2'-HYDROXYMETHYL-                                        | o-Toluidine; N,N-bis(2-hydroxyethyl)-                                               |
|--------------------|-------------------------------------------------------------------------------------|-------------------------------------------------------------------------------------|-------------------------------------------------------------------------------------|
| Structure          | 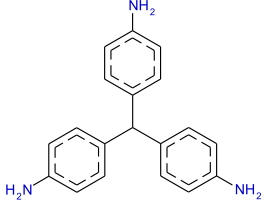 |  |  |
| Actual Endpoint    | Moderate                                                                            | Moderate                                                                            | Severe                                                                              |
| Predicted Endpoint | Moderate                                                                            | Moderate                                                                            | Moderate                                                                            |
| Distance           | 0.579                                                                               | 0.696                                                                               | 0.713                                                                               |
| Reference          | 28ZPAK-;73;72                                                                       | IHFCA 6;1;67                                                                        | Prehled Prumyslove Toxikologie; Organické Latky; Marhold; J. -;697;86               |

## Model Applicability

Unknown features are fingerprint features in the query molecule, but not found or appearing too infrequently in the training set.

1. All properties and OPS components are within expected ranges.

## Feature Contribution

### Top features for positive contribution

| Fingerprint | Bit/Smiles  | Feature Structure                                                                                                                                       | Score | Severe in training set |
|-------------|-------------|---------------------------------------------------------------------------------------------------------------------------------------------------------|-------|------------------------|
| SCFP_12     | -1640858361 | <p>AND Enantiomer</p> 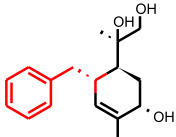 <p>[*]CC[c]1:[cH]:[cH]:[cH]:[cH]:[cH]:1</p> | 0.376 | 4 out of 4             |



|                                        |             |                                                                                                                                               |        |                        |
|----------------------------------------|-------------|-----------------------------------------------------------------------------------------------------------------------------------------------|--------|------------------------|
| SCFP_12                                | -1272709286 | <p>AND Enantiomer</p> 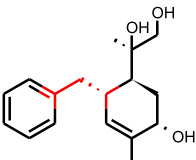 <p>[*]CC[c](:[*]):[*]</p>           | 0.231  | 24 out of 31           |
| SCFP_12                                | 1702664599  | <p>AND Enantiomer</p>  <p>[*]C([*])[C@@H](O)C(=[*])[*]</p> | 0.212  | 7 out of 9             |
| Top Features for negative contribution |             |                                                                                                                                               |        |                        |
| Fingerprint                            | Bit/Smiles  | Feature Structure                                                                                                                             | Score  | Severe in training set |
| SCFP_12                                | 1847692671  | <p>AND Enantiomer</p>  <p>[*]C([*])[C@@](C)(O)C</p>        | -0.475 | 0 out of 1             |
| SCFP_12                                | 1416196903  | <p>AND Enantiomer</p>  <p>[*]OC(C)(C)C([*])[*]</p>       | -0.383 | 3 out of 8             |
| SCFP_12                                | -1043310069 | <p>AND Enantiomer</p>  <p>[*]C[C@@H](C=[*])C([*])[*]</p> | -0.246 | 15 out of 32           |

AND Enantiomer

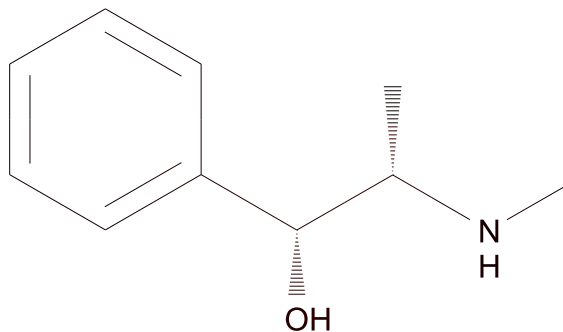C<sub>10</sub>H<sub>15</sub>NO

Molecular Weight: 165.232

ALogP: 1.234

Rotatable Bonds: 3

Acceptors: 2

Donors: 2

## Model Prediction

Prediction: Irritant

Probability: 1

Enrichment: 1.18

Bayesian Score: 1.47

Mahalanobis Distance: 5.04

Mahalanobis Distance p-value: 1

Prediction: Positive if the Bayesian score is above the estimated best cutoff value from minimizing the false positive and false negative rate.

Probability: The estimated probability that the sample is in the positive category. This assumes that the Bayesian score follows a normal distribution and is different from the prediction using a cutoff.

Enrichment: An estimate of enrichment, that is, the increased likelihood (versus random) of this sample being in the category.

Bayesian Score: The standard Laplacian-modified Bayesian score.

Mahalanobis Distance: The Mahalanobis distance (MD) is the distance to the center of the training data. The larger the MD, the less trustworthy the prediction.

Mahalanobis Distance p-value: The p-value gives the fraction of training data with an MD greater than or equal to the one for the given sample, assuming normally distributed data. The smaller the p-value, the less trustworthy the prediction. For highly non-normal X properties (e.g., fingerprints), the MD p-value is wildly inaccurate.

## Structural Similar Compounds

| Name               | ETHANOL;2-(PHENETHYLAMINO)- | O-TOLUIDINO-ETHANOL | Ethanol; 2-anilino-                                                   |
|--------------------|-----------------------------|---------------------|-----------------------------------------------------------------------|
| Structure          |                             |                     |                                                                       |
| Actual Endpoint    | Irritant                    | Irritant            | Irritant                                                              |
| Predicted Endpoint | Irritant                    | Irritant            | Irritant                                                              |
| Distance           | 0.425                       | 0.436               | 0.484                                                                 |
| Reference          | AMIHBC 10;61;54             | JIHTAB 31;60;49     | Prehled Prumyslove Toxikologie; Organické Latky; Marhold; J. -;691;86 |

## Model Applicability

Unknown features are fingerprint features in the query molecule, but not found or appearing too infrequently in the training set.

1. All properties and OPS components are within expected ranges.

## Feature Contribution

### Top features for positive contribution

| Fingerprint | Bit/Smiles | Feature Structure                                       | Score | Irritant in training set |
|-------------|------------|---------------------------------------------------------|-------|--------------------------|
| FCFP_12     | 1186393305 | <p>AND Enantiomer</p> <p>[*]C([*])[C@H](O)[C@H](*)N</p> | 0.197 | 13 out of 13             |

|                                        |             |                                                                                                                                                                              |         |                          |
|----------------------------------------|-------------|------------------------------------------------------------------------------------------------------------------------------------------------------------------------------|---------|--------------------------|
| FCFP_12                                | -1931573337 | <p>AND Enantiomer</p> 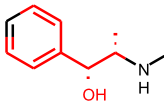 <p>[*]C([*])(C@H)(O)[c]1<br/>:[cH]:[cH]:[*]:[cH]:<br/>:[cH]:1</p>  | 0.195   | 12 out of 12             |
| FCFP_12                                | -1083860676 | <p>AND Enantiomer</p>  <p>[*]C([*])(C@H)(O)[c]1<br/>:[cH]:[cH]:[cH]:[cH]:<br/>:[cH]:1</p> | 0.192   | 10 out of 10             |
| Top Features for negative contribution |             |                                                                                                                                                                              |         |                          |
| Fingerprint                            | Bit/Smiles  | Feature Structure                                                                                                                                                            | Score   | Irritant in training set |
| FCFP_12                                | -1698724694 | <p>AND Enantiomer</p>  <p>[*]C([*])[c]1:[cH]:[cH]:[cH]:[cH]:[cH]:[cH]:1</p>               | -0.0964 | 107 out of 146           |
| FCFP_12                                | -453677277  | <p>AND Enantiomer</p>  <p>[*]C([*])[c]1:[cH]:[*]:[cH]:[cH]:[cH]:1</p>                   | 0       | 264 out of 323           |
| FCFP_12                                | 203677720   | <p>AND Enantiomer</p>  <p>[*]C([*])[c](:[cH]:[*]):[cH]:[*]</p>                          | 0       | 319 out of 382           |

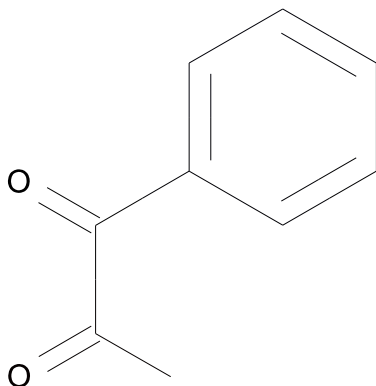C<sub>9</sub>H<sub>8</sub>O<sub>2</sub>

Molecular Weight: 148.159

ALogP: 1.446

Rotatable Bonds: 2

Acceptors: 2

Donors: 0

## Model Prediction

**Prediction: Irritant**

Probability: 0.976

Enrichment: 1.15

Bayesian Score: 0.192

Mahalanobis Distance: 3.35

Mahalanobis Distance p-value: 1

Prediction: Positive if the Bayesian score is above the estimated best cutoff value from minimizing the false positive and false negative rate.

Probability: The estimated probability that the sample is in the positive category. This assumes that the Bayesian score follows a normal distribution and is different from the prediction using a cutoff.

Enrichment: An estimate of enrichment, that is, the increased likelihood (versus random) of this sample being in the category.

Bayesian Score: The standard Laplacian-modified Bayesian score.

Mahalanobis Distance: The Mahalanobis distance (MD) is the distance to the center of the training data. The larger the MD, the less trustworthy the prediction.

Mahalanobis Distance p-value: The p-value gives the fraction of training data with an MD greater than or equal to the one for the given sample, assuming normally distributed data. The smaller the p-value, the less trustworthy the prediction. For highly non-normal X properties (e.g., fingerprints), the MD p-value is wildly inaccurate.

## Structural Similar Compounds

| Name               | ACETOPHENONE      | METHYL BENZOATE | Propiophenone                                                         |
|--------------------|-------------------|-----------------|-----------------------------------------------------------------------|
| Structure          |                   |                 |                                                                       |
| Actual Endpoint    | Irritant          | Irritant        | Irritant                                                              |
| Predicted Endpoint | Irritant          | Non-Irritant    | Irritant                                                              |
| Distance           | 0.310             | 0.380           | 0.389                                                                 |
| Reference          | AJOPAA 29;1363;46 | AMIHBC 10;61;54 | Prehled Prumyslove Toxikologie; Organicke Latky; Marhold; J. -;291;86 |

## Model Applicability

Unknown features are fingerprint features in the query molecule, but not found or appearing too infrequently in the training set.

1. All properties and OPS components are within expected ranges.

## Feature Contribution

### Top features for positive contribution

| Fingerprint | Bit/Smiles | Feature Structure    | Score | Irritant in training set |
|-------------|------------|----------------------|-------|--------------------------|
| FCFP_12     | 565968762  | <br>[*]C(=[*])C(=O)C | 0.11  | 38 out of 42             |

| FCFP_12                                | 16          | 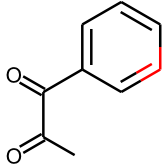<br><chem>[*][c](:[*]):[*]</chem>                           | 0.0586  | 442 out of 516           |
|----------------------------------------|-------------|------------------------------------------------------------------------------------------------------------------------------------------------|---------|--------------------------|
| FCFP_12                                | -1549192822 | <br><chem>[*]C(=[*])C(=O)[c](:[*]):[*]</chem>               | 0.0547  | 12 out of 14             |
| Top Features for negative contribution |             |                                                                                                                                                |         |                          |
| Fingerprint                            | Bit/Smiles  | Feature Structure                                                                                                                              | Score   | Irritant in training set |
| FCFP_12                                | -1698724694 | <br><chem>[*]C([*])[c]1:[cH]:[cH]:[cH]:[cH]:[cH]:1</chem>   | -0.0964 | 107 out of 146           |
| FCFP_12                                | 975909016   | <br><chem>[*]C(=[*])C(=O)[c]1:[cH]:[cH]:[cH]:[cH]:1</chem> | -0.0639 | 6 out of 8               |
| FCFP_12                                | 0           | <br><chem>[*]C([*])[*]</chem>                             | 0       | 1184 out of 1397         |

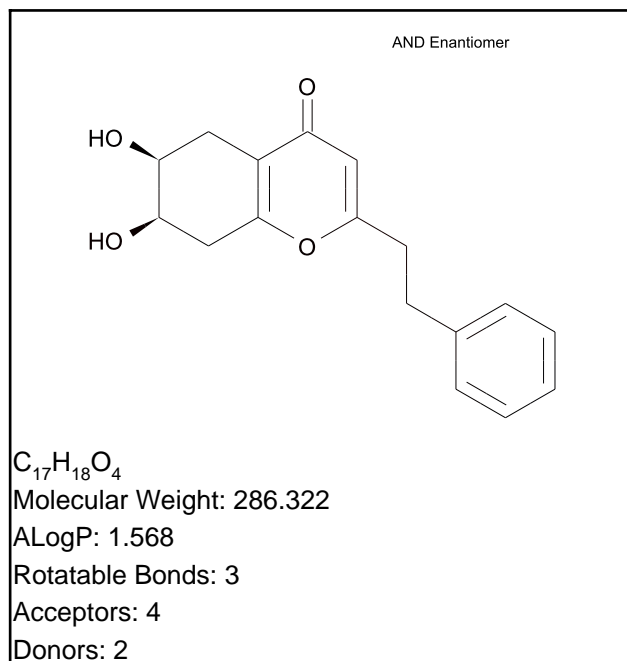

## Model Prediction

**Prediction:** Irritant

Probability: 1

Enrichment: 1.18

Bayesian Score: 0.52

Mahalanobis Distance: 10.4

Mahalanobis Distance p-value: 0.0363

Prediction: Positive if the Bayesian score is above the estimated best cutoff value from minimizing the false positive and false negative rate.

Probability: The estimated probability that the sample is in the positive category. This assumes that the Bayesian score follows a normal distribution and is different from the prediction using a cutoff.

Enrichment: An estimate of enrichment, that is, the increased likelihood (versus random) of this sample being in the category.

Bayesian Score: The standard Laplacian-modified Bayesian score.

Mahalanobis Distance: The Mahalanobis distance (MD) is the distance to the center of the training data. The larger the MD, the less trustworthy the prediction.

Mahalanobis Distance p-value: The p-value gives the fraction of training data with an MD greater than or equal to the one for the given sample, assuming normally distributed data. The smaller the p-value, the less trustworthy the prediction. For highly non-normal X properties (e.g., fingerprints), the MD p-value is wildly inaccurate.

## Structural Similar Compounds

| Name               | 2-BIPHENYLCARBOXYLIC ACID; 2'-HYDROXYMETHYL-                                        | 2,2'-Dihydroxy-4-methoxybenzophenone                                                | BENZOIN; OXIME                                                                      |
|--------------------|-------------------------------------------------------------------------------------|-------------------------------------------------------------------------------------|-------------------------------------------------------------------------------------|
| Structure          | 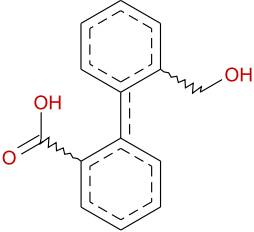 |  |  |
| Actual Endpoint    | Irritant                                                                            | Non-Irritant                                                                        | Irritant                                                                            |
| Predicted Endpoint | Irritant                                                                            | Non-Irritant                                                                        | Irritant                                                                            |
| Distance           | 0.585                                                                               | 0.585                                                                               | 0.602                                                                               |
| Reference          | IHFCAI 6;1;67                                                                       | J. Am. Coll. Toxicol. 2(5):35;1983                                                  | 28ZPAK-;111;72                                                                      |

## Model Applicability

Unknown features are fingerprint features in the query molecule, but not found or appearing too infrequently in the training set.

1. All properties and OPS components are within expected ranges.

## Feature Contribution

### Top features for positive contribution

| Fingerprint | Bit/Smiles | Feature Structure                                                                                                        | Score | Irritant in training set |
|-------------|------------|--------------------------------------------------------------------------------------------------------------------------|-------|--------------------------|
| FCFP_12     | 436915834  | 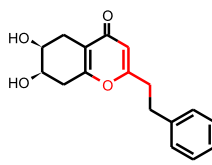<br><chem>[*]C\C(=C\[*])O[*]</chem> | 0.167 | 4 out of 4               |



AND Enantiomer

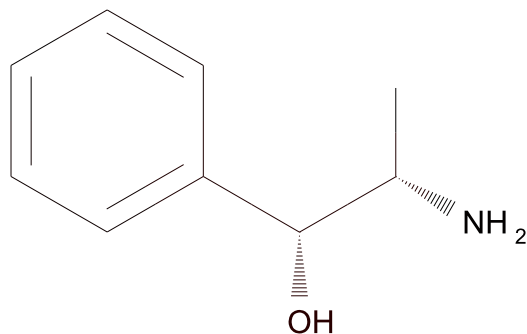 $C_9H_{13}NO$ 

Molecular Weight: 151.206

ALogP: 0.802

Rotatable Bonds: 2

Acceptors: 2

Donors: 2

## Model Prediction

**Prediction: Irritant**

Probability: 1

Enrichment: 1.18

Bayesian Score: 1.14

Mahalanobis Distance: 4.97

Mahalanobis Distance p-value: 1

Prediction: Positive if the Bayesian score is above the estimated best cutoff value from minimizing the false positive and false negative rate.

Probability: The estimated probability that the sample is in the positive category. This assumes that the Bayesian score follows a normal distribution and is different from the prediction using a cutoff.

Enrichment: An estimate of enrichment, that is, the increased likelihood (versus random) of this sample being in the category.

Bayesian Score: The standard Laplacian-modified Bayesian score.

Mahalanobis Distance: The Mahalanobis distance (MD) is the distance to the center of the training data. The larger the MD, the less trustworthy the prediction.

Mahalanobis Distance p-value: The p-value gives the fraction of training data with an MD greater than or equal to the one for the given sample, assuming normally distributed data. The smaller the p-value, the less trustworthy the prediction. For highly non-normal X properties (e.g., fingerprints), the MD p-value is wildly inaccurate.

## Structural Similar Compounds

| Name               | 3-AMINO-2-METHYL-BENZYL ALCOHOL | 1;2-DIMETHYL;1;3-BUTANEDIOL | METHYLAMINE;M-PHENYLENEBIS- |
|--------------------|---------------------------------|-----------------------------|-----------------------------|
| Structure          |                                 |                             |                             |
| Actual Endpoint    | Irritant                        | Irritant                    | Irritant                    |
| Predicted Endpoint | Irritant                        | Irritant                    | Irritant                    |
| Distance           | 0.339                           | 0.453                       | 0.455                       |
| Reference          | AMIHBC 10;61;54                 | AIHAAP 23;95;62             | 28ZPAK-;64;72               |

## Model Applicability

Unknown features are fingerprint features in the query molecule, but not found or appearing too infrequently in the training set.

1. All properties and OPS components are within expected ranges.

## Feature Contribution

### Top features for positive contribution

| Fingerprint | Bit/Smiles | Feature Structure                                                    | Score | Irritant in training set |
|-------------|------------|----------------------------------------------------------------------|-------|--------------------------|
| FCFP_12     | 1186393305 | <p>AND Enantiomer</p> <p>[*]C([*])([C@H](O)[C@H](*)N)C1=CC=CC=C1</p> | 0.197 | 13 out of 13             |



|                                        |             |                                                                                                                                                                              |         |                          |
|----------------------------------------|-------------|------------------------------------------------------------------------------------------------------------------------------------------------------------------------------|---------|--------------------------|
| FCFP_12                                | -1931573337 | <p>AND Enantiomer</p> 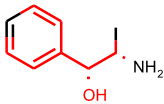 <p>[*]C([*])(C@H)(O)[c]1<br/>:[cH]:[cH]:[*]:[cH]:<br/>:[cH]:1</p>  | 0.195   | 12 out of 12             |
| FCFP_12                                | -1083860676 | <p>AND Enantiomer</p>  <p>[*]C([*])(C@H)(O)[c]1<br/>:[cH]:[cH]:[cH]:[cH]:<br/>:[cH]:1</p> | 0.192   | 10 out of 10             |
| Top Features for negative contribution |             |                                                                                                                                                                              |         |                          |
| Fingerprint                            | Bit/Smiles  | Feature Structure                                                                                                                                                            | Score   | Irritant in training set |
| FCFP_12                                | -1698724694 | <p>AND Enantiomer</p>  <p>[*]C([*])[c]1:[cH]:[cH]:[cH]:[cH]:[cH]:[cH]:1</p>               | -0.0964 | 107 out of 146           |
| FCFP_12                                | 991735244   | <p>AND Enantiomer</p>  <p>[*][c]1:[*]:[cH]:[cH]:[cH]:[cH]:1</p>                         | 0       | 237 out of 291           |
| FCFP_12                                | -453677277  | <p>AND Enantiomer</p>  <p>[*]C([*])[c]1:[cH]:[*]:[cH]:[cH]:[cH]:1</p>                   | 0       | 264 out of 323           |

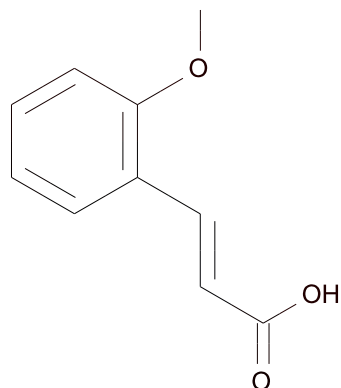C<sub>10</sub>H<sub>10</sub>O<sub>3</sub>

Molecular Weight: 178.185

ALogP: 1.911

Rotatable Bonds: 3

Acceptors: 3

Donors: 1

## Model Prediction

**Prediction: Irritant**

Probability: 1

Enrichment: 1.18

Bayesian Score: 1.11

Mahalanobis Distance: 6.09

Mahalanobis Distance p-value: 1

Prediction: Positive if the Bayesian score is above the estimated best cutoff value from minimizing the false positive and false negative rate.

Probability: The estimated probability that the sample is in the positive category. This assumes that the Bayesian score follows a normal distribution and is different from the prediction using a cutoff.

Enrichment: An estimate of enrichment, that is, the increased likelihood (versus random) of this sample being in the category.

Bayesian Score: The standard Laplacian-modified Bayesian score.

Mahalanobis Distance: The Mahalanobis distance (MD) is the distance to the center of the training data. The larger the MD, the less trustworthy the prediction.

Mahalanobis Distance p-value: The p-value gives the fraction of training data with an MD greater than or equal to the one for the given sample, assuming normally distributed data. The smaller the p-value, the less trustworthy the prediction. For highly non-normal X properties (e.g., fingerprints), the MD p-value is wildly inaccurate.

## Structural Similar Compounds

| Name               | Ethyl Paraben                       | MANDELIC ACID; ETHYL ESTER | MANDELIC ACID; ISOPROPYL ESTER |
|--------------------|-------------------------------------|----------------------------|--------------------------------|
| Structure          |                                     |                            |                                |
| Actual Endpoint    | Non-Irritant                        | Irritant                   | Irritant                       |
| Predicted Endpoint | Non-Irritant                        | Irritant                   | Irritant                       |
| Distance           | 0.458                               | 0.467                      | 0.467                          |
| Reference          | J. Am. Coll. Toxicol. 3(5):147;1984 | AJOPAA 29;1363;46          | AJOPAA 29;1363;46              |

## Model Applicability

Unknown features are fingerprint features in the query molecule, but not found or appearing too infrequently in the training set.

1. All properties and OPS components are within expected ranges.

## Feature Contribution

### Top features for positive contribution

| Fingerprint | Bit/Smiles  | Feature Structure              | Score | Irritant in training set |
|-------------|-------------|--------------------------------|-------|--------------------------|
| FCFP_12     | -2107131107 | <br><chem>[*]C=C\C(=O)O</chem> | 0.18  | 6 out of 6               |

| FCFP_12                                | -548632217  | 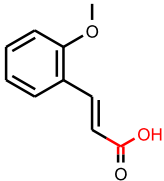<br><chem>[*]C(=[*])O</chem>                               | 0.177   | 59 out of 61             |
|----------------------------------------|-------------|-----------------------------------------------------------------------------------------------------------------------------------------------|---------|--------------------------|
| FCFP_12                                | -1099193755 | <br><chem>[*]=C[c]1:[cH]:[*]:[cH]:[cH]:[c]:1OC</chem>      | 0.175   | 5 out of 5               |
| Top Features for negative contribution |             |                                                                                                                                               |         |                          |
| Fingerprint                            | Bit/Smiles  | Feature Structure                                                                                                                             | Score   | Irritant in training set |
| FCFP_12                                | -146015125  | <br><chem>[*]C(=[*])C=C\[c]([cH]:[*]):[*]</chem>           | -0.268  | 1 out of 2               |
| FCFP_12                                | 451371068   | <br><chem>[*]C=C\[c]([*]):[*]</chem>                      | -0.167  | 6 out of 9               |
| FCFP_12                                | -1698724694 | <br><chem>[*]C([*])[c]1:[cH]:[cH]:[cH]:[cH]:[c]:1</chem> | -0.0964 | 107 out of 146           |

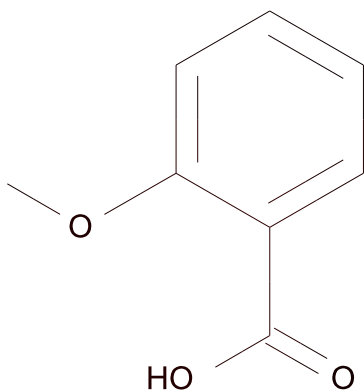C<sub>8</sub>H<sub>8</sub>O<sub>3</sub>

Molecular Weight: 152.147

ALogP: 1.443

Rotatable Bonds: 2

Acceptors: 3

Donors: 1

## Model Prediction

**Prediction: Irritant**

Probability: 1

Enrichment: 1.18

Bayesian Score: 1.58

Mahalanobis Distance: 4.77

Mahalanobis Distance p-value: 1

Prediction: Positive if the Bayesian score is above the estimated best cutoff value from minimizing the false positive and false negative rate.

Probability: The estimated probability that the sample is in the positive category. This assumes that the Bayesian score follows a normal distribution and is different from the prediction using a cutoff.

Enrichment: An estimate of enrichment, that is, the increased likelihood (versus random) of this sample being in the category.

Bayesian Score: The standard Laplacian-modified Bayesian score.

Mahalanobis Distance: The Mahalanobis distance (MD) is the distance to the center of the training data. The larger the MD, the less trustworthy the prediction.

Mahalanobis Distance p-value: The p-value gives the fraction of training data with an MD greater than or equal to the one for the given sample, assuming normally distributed data. The smaller the p-value, the less trustworthy the prediction. For highly non-normal X properties (e.g., fingerprints), the MD p-value is wildly inaccurate.

## Structural Similar Compounds

| Name               | SALICYCLIC ACID;<br>METHYL ESTER | BENZOIC ACID   | RESORCINOL;<br>MONOACETATE |
|--------------------|----------------------------------|----------------|----------------------------|
| Structure          |                                  |                |                            |
| Actual Endpoint    | Irritant                         | Irritant       | Irritant                   |
| Predicted Endpoint | Irritant                         | Irritant       | Irritant                   |
| Distance           | 0.355                            | 0.365          | 0.385                      |
| Reference          | 28ZPAK-;106;72                   | BIOFX* 28-4/73 | JAPMA8 46;185;57           |

## Model Applicability

Unknown features are fingerprint features in the query molecule, but not found or appearing too infrequently in the training set.

1. All properties and OPS components are within expected ranges.

## Feature Contribution

### Top features for positive contribution

| Fingerprint | Bit/Smiles | Feature Structure                                              | Score | Irritant in training set |
|-------------|------------|----------------------------------------------------------------|-------|--------------------------|
| FCFP_12     | 937923569  | <br><chem>[*][c](:[*]):[c](:[cH]           ]:[*])C(=O)O</chem> | 0.198 | 14 out of 14             |

| FCFP_12                                | -1549222613 | 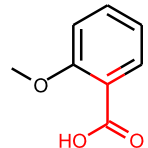<br><chem>[*]:[c](:[*])C(=O)O</chem>                      | 0.198   | 14 out of 14             |
|----------------------------------------|-------------|----------------------------------------------------------------------------------------------------------------------------------------------|---------|--------------------------|
| FCFP_12                                | -548632217  | <br><chem>[*]C(=[*])O</chem>                              | 0.177   | 59 out of 61             |
| Top Features for negative contribution |             |                                                                                                                                              |         |                          |
| Fingerprint                            | Bit/Smiles  | Feature Structure                                                                                                                            | Score   | Irritant in training set |
| FCFP_12                                | -1698724694 | <br><chem>[*]C([*])[c]1:[cH]:[cH]:[cH]:[cH]:[cH]:1</chem> | -0.0964 | 107 out of 146           |
| FCFP_12                                | 136627117   | <br><chem>[*]OC</chem>                                   | 0       | 96 out of 113            |
| FCFP_12                                | 991735244   | <br><chem>[*][c]1:[*]:[cH]:[cH]:[cH]:[cH]:1</chem>      | 0       | 237 out of 291           |

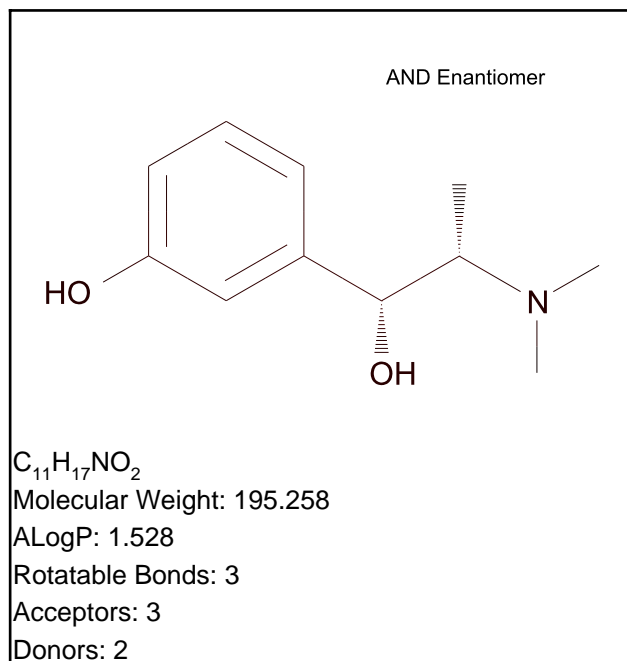

## Model Prediction

Prediction: Irritant

Probability: 1

Enrichment: 1.18

Bayesian Score: 2.43

Mahalanobis Distance: 4.92

Mahalanobis Distance p-value: 1

Prediction: Positive if the Bayesian score is above the estimated best cutoff value from minimizing the false positive and false negative rate.

Probability: The estimated probability that the sample is in the positive category. This assumes that the Bayesian score follows a normal distribution and is different from the prediction using a cutoff.

Enrichment: An estimate of enrichment, that is, the increased likelihood (versus random) of this sample being in the category.

Bayesian Score: The standard Laplacian-modified Bayesian score.

Mahalanobis Distance: The Mahalanobis distance (MD) is the distance to the center of the training data. The larger the MD, the less trustworthy the prediction.

Mahalanobis Distance p-value: The p-value gives the fraction of training data with an MD greater than or equal to the one for the given sample, assuming normally distributed data. The smaller the p-value, the less trustworthy the prediction. For highly non-normal X properties (e.g., fingerprints), the MD p-value is wildly inaccurate.

## Structural Similar Compounds

| Name               | o-Toluidine; N,N-bis(2-hydroxyethyl)-                                               | ETHANOL; 2,2'-CYCLOHEXYLIMINODI-                                                    | BENZOIN; OXIME                                                                      |
|--------------------|-------------------------------------------------------------------------------------|-------------------------------------------------------------------------------------|-------------------------------------------------------------------------------------|
| Structure          | 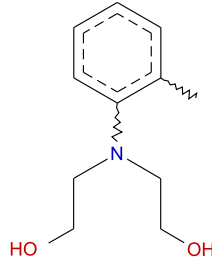 |  |  |
| Actual Endpoint    | Irritant                                                                            | Irritant                                                                            | Irritant                                                                            |
| Predicted Endpoint | Irritant                                                                            | Irritant                                                                            | Irritant                                                                            |
| Distance           | 0.476                                                                               | 0.505                                                                               | 0.512                                                                               |
| Reference          | Prehled Prumyslove Toxikologie; Organicke Latky; Marhold; J. -:697;86               | 34ZIAG 61;69                                                                        | 28ZPAK-;111;72                                                                      |

## Model Applicability

Unknown features are fingerprint features in the query molecule, but not found or appearing too infrequently in the training set.

1. All properties and OPS components are within expected ranges.

## Feature Contribution

| Top features for positive contribution |            |                                                                                                                                                                                     |       |                          |
|----------------------------------------|------------|-------------------------------------------------------------------------------------------------------------------------------------------------------------------------------------|-------|--------------------------|
| Fingerprint                            | Bit/Smiles | Feature Structure                                                                                                                                                                   | Score | Irritant in training set |
| FCFP_12                                | 136388789  | <p style="text-align: center;">AND Enantiomer</p> 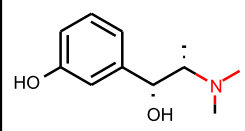 <p style="text-align: center;">[*]N[*]C</p> | 0.206 | 30 out of 30             |

|                                        |             |                                                                                                                                                                  |       |                          |
|----------------------------------------|-------------|------------------------------------------------------------------------------------------------------------------------------------------------------------------|-------|--------------------------|
| FCFP_12                                | 1186393305  | <p>AND Enantiomer</p> 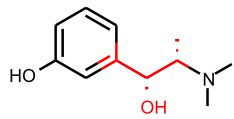 <p>[*]C([*])(C@H)(O)[c]([*]):[*])</p>                  | 0.197 | 13 out of 13             |
| FCFP_12                                | -1931573337 | <p>AND Enantiomer</p>  <p>[*]C([*])(C@H)(O)[c]1:[cH]:[cH]:[*]:[cH]:[cH]:1</p> | 0.195 | 12 out of 12             |
| Top Features for negative contribution |             |                                                                                                                                                                  |       |                          |
| Fingerprint                            | Bit/Smiles  | Feature Structure                                                                                                                                                | Score | Irritant in training set |
| FCFP_12                                | 991735244   | <p>AND Enantiomer</p>  <p>[*][c]1:[*]:[cH]:[cH]:[cH]:[cH]:1</p>               | 0     | 237 out of 291           |
| FCFP_12                                | -453677277  | <p>AND Enantiomer</p>  <p>[*]C([*])[c]1:[cH]:[*]:[cH]:[cH]:[cH]:1</p>       | 0     | 264 out of 323           |
| FCFP_12                                | 0           | <p>AND Enantiomer</p>  <p>[*]C([*])[*]</p>                                  | 0     | 1184 out of 1397         |

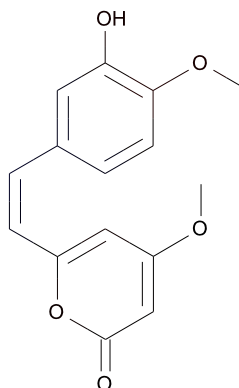C<sub>15</sub>H<sub>14</sub>O<sub>5</sub>

Molecular Weight: 274.269

ALogP: 1.969

Rotatable Bonds: 4

Acceptors: 5

Donors: 1

## Model Prediction

**Prediction: Irritant**

Probability: 0.976

Enrichment: 1.15

Bayesian Score: 0.185

Mahalanobis Distance: 9

Mahalanobis Distance p-value: 0.512

Prediction: Positive if the Bayesian score is above the estimated best cutoff value from minimizing the false positive and false negative rate.

Probability: The estimated probability that the sample is in the positive category. This assumes that the Bayesian score follows a normal distribution and is different from the prediction using a cutoff.

Enrichment: An estimate of enrichment, that is, the increased likelihood (versus random) of this sample being in the category.

Bayesian Score: The standard Laplacian-modified Bayesian score.

Mahalanobis Distance: The Mahalanobis distance (MD) is the distance to the center of the training data. The larger the MD, the less trustworthy the prediction.

Mahalanobis Distance p-value: The p-value gives the fraction of training data with an MD greater than or equal to the one for the given sample, assuming normally distributed data. The smaller the p-value, the less trustworthy the prediction. For highly non-normal X properties (e.g., fingerprints), the MD p-value is wildly inaccurate.

## Structural Similar Compounds

| Name               | 2;8;9-TRIOXA-5-AZA-1-SILABICYCLO(3.3.3)UNDECANE;1-(3-AMINOPROPYL)- | 2-Hydroxy-4-methoxybenzophenone    | 2;5-DICHLORO-4(3'-METHYL-5' PYRAZOLON-1'-YL)BENZENE SULFONIC ACID |
|--------------------|--------------------------------------------------------------------|------------------------------------|-------------------------------------------------------------------|
| Structure          |                                                                    |                                    |                                                                   |
| Actual Endpoint    | Irritant                                                           | Non-Irritant                       | Irritant                                                          |
| Predicted Endpoint | Irritant                                                           | Non-Irritant                       | Irritant                                                          |
| Distance           | 0.579                                                              | 0.634                              | 0.647                                                             |
| Reference          | 28ZPAK-;220;72                                                     | J. Am. Coll. Toxicol. 2(5):35;1983 | 28ZPAK-;186;72                                                    |

## Model Applicability

Unknown features are fingerprint features in the query molecule, but not found or appearing too infrequently in the training set.

1. All properties and OPS components are within expected ranges.

## Feature Contribution

### Top features for positive contribution

| Fingerprint | Bit/Smiles | Feature Structure                    | Score | Irritant in training set |
|-------------|------------|--------------------------------------|-------|--------------------------|
| FCFP_12     | 436915834  | <br><chem>[*]C\C(=C\[*])\O[*]</chem> | 0.167 | 4 out of 4               |



| FCFP_12                                | -166452859  | 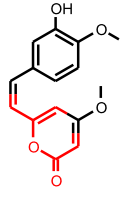<br><chem>[*]=CC1=C[*]=CC(=O)O1</chem>                      | 0.137  | 2 out of 2               |
|----------------------------------------|-------------|------------------------------------------------------------------------------------------------------------------------------------------------|--------|--------------------------|
| FCFP_12                                | 7           | <br><chem>[*]O</chem>                                       | 0.119  | 142 out of 156           |
| Top Features for negative contribution |             |                                                                                                                                                |        |                          |
| Fingerprint                            | Bit/Smiles  | Feature Structure                                                                                                                              | Score  | Irritant in training set |
| FCFP_12                                | -1078052987 | <br><chem>[*]C=C/[c]1:[cH]:[cH]:[cH]:[c]([*]):[cH]:1</chem> | -0.344 | 2 out of 4               |
| FCFP_12                                | -146015125  | <br><chem>[*]C(=[*])C=C\[c](:[cH]):[c]([*]):[*]</chem>     | -0.268 | 1 out of 2               |
| FCFP_12                                | 451371068   | <br><chem>[*]C=C\[c](:[*]):[*]</chem>                     | -0.167 | 6 out of 9               |

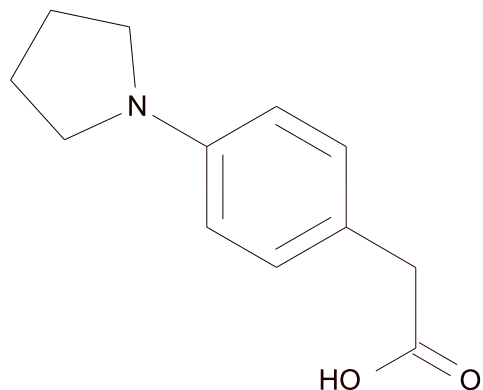

$C_{12}H_{15}NO_2$

Molecular Weight: 205.253

ALogP: 2.117

Rotatable Bonds: 3

Acceptors: 3

Donors: 1

## Model Prediction

**Prediction: Irritant**

Probability: 1

Enrichment: 1.18

Bayesian Score: 1.6

Mahalanobis Distance: 11.1

Mahalanobis Distance p-value: 0.00337

Prediction: Positive if the Bayesian score is above the estimated best cutoff value from minimizing the false positive and false negative rate.

Probability: The estimated probability that the sample is in the positive category. This assumes that the Bayesian score follows a normal distribution and is different from the prediction using a cutoff.

Enrichment: An estimate of enrichment, that is, the increased likelihood (versus random) of this sample being in the category.

Bayesian Score: The standard Laplacian-modified Bayesian score.

Mahalanobis Distance: The Mahalanobis distance (MD) is the distance to the center of the training data. The larger the MD, the less trustworthy the prediction.

Mahalanobis Distance p-value: The p-value gives the fraction of training data with an MD greater than or equal to the one for the given sample, assuming normally distributed data. The smaller the p-value, the less trustworthy the prediction. For highly non-normal X properties (e.g., fingerprints), the MD p-value is wildly inaccurate.

## Structural Similar Compounds

| Name               | Propionitrile; 3-(N-(2-hydroxyethyl)anilino)-                         | 1-NAPHTHALENEACETIC ACID | MANDELIC ACID; ISOPROPYL ESTER |
|--------------------|-----------------------------------------------------------------------|--------------------------|--------------------------------|
| Structure          |                                                                       |                          |                                |
| Actual Endpoint    | Irritant                                                              | Irritant                 | Irritant                       |
| Predicted Endpoint | Irritant                                                              | Irritant                 | Irritant                       |
| Distance           | 0.482                                                                 | 0.487                    | 0.501                          |
| Reference          | Prehled Prumyslove Toxikologie; Organické Latky; Marhold; J. -;918;86 | PESTC* 9;10;80           | AJOPAA 29;1363;46              |

## Model Applicability

Unknown features are fingerprint features in the query molecule, but not found or appearing too infrequently in the training set.

1. All properties and OPS components are within expected ranges.

## Feature Contribution

| Top features for positive contribution |            |                   |       |                          |
|----------------------------------------|------------|-------------------|-------|--------------------------|
| Fingerprint                            | Bit/Smiles | Feature Structure | Score | Irritant in training set |
| FCFP_12                                | -548632217 | <br>[*]C(=[*])O   | 0.177 | 59 out of 61             |

| FCFP_12                                | -1176841573 | 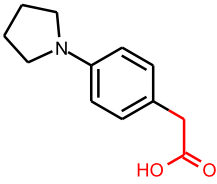<br><chem>[*]=CC(=O)O</chem>                               | 0.164   | 43 out of 45             |
|----------------------------------------|-------------|-----------------------------------------------------------------------------------------------------------------------------------------------|---------|--------------------------|
| FCFP_12                                | -822674211  | <br><chem>[*]:[c](:[*])N1CCCC1</chem>                      | 0.137   | 2 out of 2               |
| Top Features for negative contribution |             |                                                                                                                                               |         |                          |
| Fingerprint                            | Bit/Smiles  | Feature Structure                                                                                                                             | Score   | Irritant in training set |
| FCFP_12                                | 202105689   | <br><chem>[*][c]1:[cH]:[cH]:[c]([cH]:[cH]:1)N2CCCC2</chem> | -0.103  | 5 out of 7               |
| FCFP_12                                | -98332825   | <br><chem>[*]N1CCCC1</chem>                               | -0.0663 | 105 out of 139           |
| FCFP_12                                | 203677720   | <br><chem>[*]C([*])[c](:[cH]:[*])[cH]:[*]</chem>         | 0       | 319 out of 382           |

AND Enantiomer

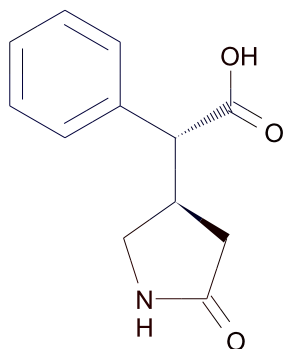C<sub>12</sub>H<sub>13</sub>NO<sub>3</sub>

Molecular Weight: 219.237

ALogP: 0.621

Rotatable Bonds: 3

Acceptors: 3

Donors: 2

## Model Prediction

Prediction: Irritant

Probability: 1

Enrichment: 1.18

Bayesian Score: 0.426

Mahalanobis Distance: 7.63

Mahalanobis Distance p-value: 0.976

Prediction: Positive if the Bayesian score is above the estimated best cutoff value from minimizing the false positive and false negative rate.

Probability: The estimated probability that the sample is in the positive category. This assumes that the Bayesian score follows a normal distribution and is different from the prediction using a cutoff.

Enrichment: An estimate of enrichment, that is, the increased likelihood (versus random) of this sample being in the category.

Bayesian Score: The standard Laplacian-modified Bayesian score.

Mahalanobis Distance: The Mahalanobis distance (MD) is the distance to the center of the training data. The larger the MD, the less trustworthy the prediction.

Mahalanobis Distance p-value: The p-value gives the fraction of training data with an MD greater than or equal to the one for the given sample, assuming normally distributed data. The smaller the p-value, the less trustworthy the prediction. For highly non-normal X properties (e.g., fingerprints), the MD p-value is wildly inaccurate.

## Structural Similar Compounds

| Name               | ACETANILIDE; 3'-AMINO-4'-ETHOXY- | ACETIC ACID; CYCLOHEXYLAMINO- | Anthranilic acid; N-methyl-                                           |
|--------------------|----------------------------------|-------------------------------|-----------------------------------------------------------------------|
| Structure          |                                  |                               |                                                                       |
| Actual Endpoint    | Irritant                         | Irritant                      | Irritant                                                              |
| Predicted Endpoint | Irritant                         | Irritant                      | Irritant                                                              |
| Distance           | 0.494                            | 0.500                         | 0.508                                                                 |
| Reference          | 28ZPAK 115;72                    | 28ZPAK-;64;72                 | Prehled Prumyslove Toxikologie; Organicke Latky; Marhold; J. -;741;86 |

## Model Applicability

Unknown features are fingerprint features in the query molecule, but not found or appearing too infrequently in the training set.

1. All properties and OPS components are within expected ranges.

## Feature Contribution

### Top features for positive contribution

| Fingerprint | Bit/Smiles | Feature Structure                        | Score | Irritant in training set |
|-------------|------------|------------------------------------------|-------|--------------------------|
| FCFP_12     | -885550502 | <p>AND Enantiomer</p> <p>[*]C([*])NC</p> | 0.18  | 64 out of 66             |

|                                        |             |                                                                                                                                                                             |         |                          |
|----------------------------------------|-------------|-----------------------------------------------------------------------------------------------------------------------------------------------------------------------------|---------|--------------------------|
| FCFP_12                                | -548632217  | <p>AND Enantiomer</p> 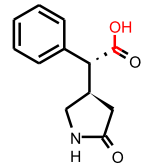 <p>[*]C(=[*])O</p>                                                | 0.177   | 59 out of 61             |
| FCFP_12                                | -416918913  | <p>AND Enantiomer</p>  <p>[*]C([*])[C@@H]1CNC(=[*])C1</p>                                | 0.175   | 5 out of 5               |
| Top Features for negative contribution |             |                                                                                                                                                                             |         |                          |
| Fingerprint                            | Bit/Smiles  | Feature Structure                                                                                                                                                           | Score   | Irritant in training set |
| FCFP_12                                | -1716639150 | <p>AND Enantiomer</p>  <p>[*]C([*])[C@@H](C(=[*])O)[c]1:[cH]:[cH]:[cH]:[cH]:[cH]:1</p>   | -0.537  | 1 out of 3               |
| FCFP_12                                | -1133295320 | <p>AND Enantiomer</p>  <p>[*]C([*])[C@@H](C(=[*])O)[c]1:[cH]:[cH]:[cH]:[cH]:[cH]:1</p> | -0.537  | 1 out of 3               |
| FCFP_12                                | -1698724694 | <p>AND Enantiomer</p>  <p>[*]C([*])[c]1:[cH]:[cH]:[cH]:[cH]:[cH]:1</p>                 | -0.0964 | 107 out of 146           |

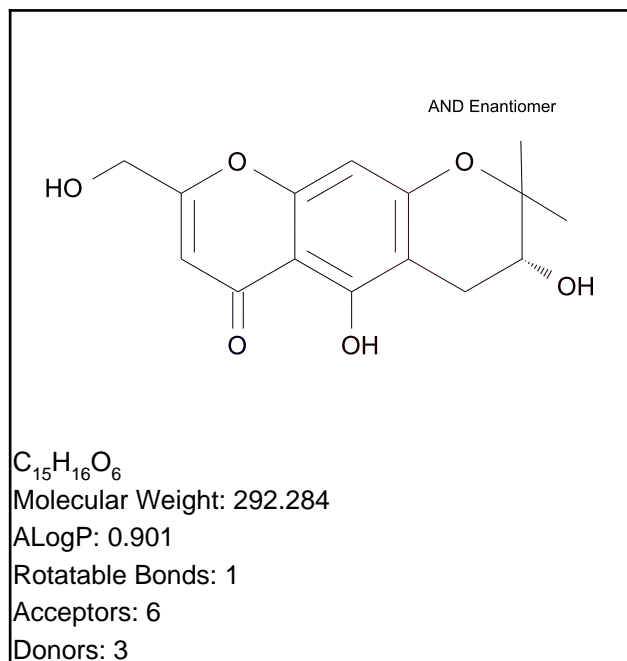

## Model Prediction

**Prediction:** Irritant

Probability: 1

Enrichment: 1.18

Bayesian Score: 1.19

Mahalanobis Distance: 8.93

Mahalanobis Distance p-value: 0.551

Prediction: Positive if the Bayesian score is above the estimated best cutoff value from minimizing the false positive and false negative rate.

Probability: The estimated probability that the sample is in the positive category. This assumes that the Bayesian score follows a normal distribution and is different from the prediction using a cutoff.

Enrichment: An estimate of enrichment, that is, the increased likelihood (versus random) of this sample being in the category.

Bayesian Score: The standard Laplacian-modified Bayesian score.

Mahalanobis Distance: The Mahalanobis distance (MD) is the distance to the center of the training data. The larger the MD, the less trustworthy the prediction.

Mahalanobis Distance p-value: The p-value gives the fraction of training data with an MD greater than or equal to the one for the given sample, assuming normally distributed data. The smaller the p-value, the less trustworthy the prediction. For highly non-normal X properties (e.g., fingerprints), the MD p-value is wildly inaccurate.

## Structural Similar Compounds

| Name               | 2-NAPHTHALENESULFONIC ACID; 4-HYDROXY-7-(METHYLAMINO)- | ANTHRAQUINONE; 1-((2-HYDROXYETHYL)AMINO)-4-(METHYLAMINO)- | 1;2;4-TRIHYDROXY ANTHRAQUINONE |
|--------------------|--------------------------------------------------------|-----------------------------------------------------------|--------------------------------|
| Structure          |                                                        |                                                           |                                |
| Actual Endpoint    | Irritant                                               | Irritant                                                  | Irritant                       |
| Predicted Endpoint | Irritant                                               | Irritant                                                  | Irritant                       |
| Distance           | 0.606                                                  | 0.636                                                     | 0.638                          |
| Reference          | 28ZPAK 190;72                                          | 28ZPAK 245;72                                             | 28ZPAK-;103;7                  |

## Model Applicability

Unknown features are fingerprint features in the query molecule, but not found or appearing too infrequently in the training set.

1. All properties and OPS components are within expected ranges.

## Feature Contribution

| Top features for positive contribution |             |                                                                                                 |       |                          |
|----------------------------------------|-------------|-------------------------------------------------------------------------------------------------|-------|--------------------------|
| Fingerprint                            | Bit/Smiles  | Feature Structure                                                                               | Score | Irritant in training set |
| FCFP_12                                | -1601875224 | <p>AND Enantiomer</p> <p><chem>[*]C[c]1:[c]([*]):[*]:[c]([*]):[c](C(=[*])[*]):[c]:1O</chem></p> | 0.184 | 7 out of 7               |

|                                        |             |                                                                                                                                                             |         |                          |
|----------------------------------------|-------------|-------------------------------------------------------------------------------------------------------------------------------------------------------------|---------|--------------------------|
| FCFP_12                                | -1099193755 | <p>AND Enantiomer</p> 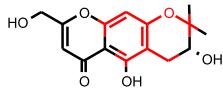 <p>[*]=C[c]1:[cH]:[*]:[cH]:[cH]:[c]:1OC</p>       | 0.175   | 5 out of 5               |
| FCFP_12                                | 436915834   | <p>AND Enantiomer</p>  <p>[*]C\C(=C\[*])\O[*]</p>                        | 0.167   | 4 out of 4               |
| Top Features for negative contribution |             |                                                                                                                                                             |         |                          |
| Fingerprint                            | Bit/Smiles  | Feature Structure                                                                                                                                           | Score   | Irritant in training set |
| FCFP_12                                | 1244036906  | <p>AND Enantiomer</p>  <p>[*][c](:[*]):[c]1C(=O)C=C([*])[*][c]:1:[*]</p> | -0.592  | 0 out of 1               |
| FCFP_12                                | -415216134  | <p>AND Enantiomer</p>  <p>[*]OC(C)(C)C([*])[*]</p>                     | -0.0889 | 11 out of 15             |
| FCFP_12                                | 0           | <p>AND Enantiomer</p>  <p>[*]C([*])[*]</p>                             | 0       | 1184 out of 1397         |

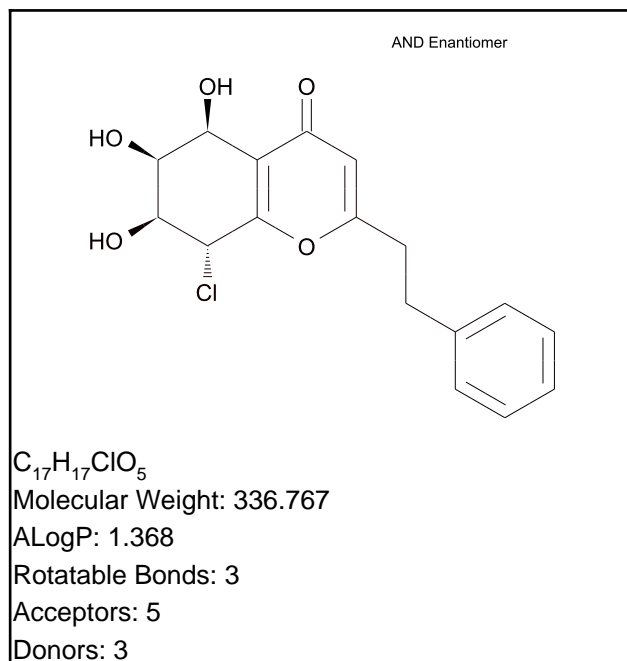

## Model Prediction

Prediction: Irritant

Probability: 1

Enrichment: 1.18

Bayesian Score: 1.16

Mahalanobis Distance: 11

Mahalanobis Distance p-value: 0.00487

Prediction: Positive if the Bayesian score is above the estimated best cutoff value from minimizing the false positive and false negative rate.

Probability: The estimated probability that the sample is in the positive category. This assumes that the Bayesian score follows a normal distribution and is different from the prediction using a cutoff.

Enrichment: An estimate of enrichment, that is, the increased likelihood (versus random) of this sample being in the category.

Bayesian Score: The standard Laplacian-modified Bayesian score.

Mahalanobis Distance: The Mahalanobis distance (MD) is the distance to the center of the training data. The larger the MD, the less trustworthy the prediction.

Mahalanobis Distance p-value: The p-value gives the fraction of training data with an MD greater than or equal to the one for the given sample, assuming normally distributed data. The smaller the p-value, the less trustworthy the prediction. For highly non-normal X properties (e.g., fingerprints), the MD p-value is wildly inaccurate.

## Structural Similar Compounds

| Name               | ANTHRAQUINONE; 1-((2-HYDROXYETHYL)AMINO)-4-(METHYLAMINO)-                           | p-Acetophenetidine; 3'-(bis(2-hydroxyethyl)amino)-                                  | Disperse Black 9                                                                    |
|--------------------|-------------------------------------------------------------------------------------|-------------------------------------------------------------------------------------|-------------------------------------------------------------------------------------|
| Structure          | 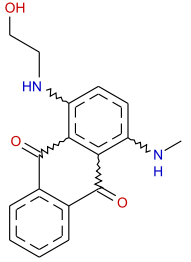 |  |  |
| Actual Endpoint    | Irritant                                                                            | Irritant                                                                            | Non-Irritant                                                                        |
| Predicted Endpoint | Irritant                                                                            | Irritant                                                                            | Non-Irritant                                                                        |
| Distance           | 0.537                                                                               | 0.654                                                                               | 0.657                                                                               |
| Reference          | 28ZPAK 245;72                                                                       | Prehled Prumyslove Toxikologie; Organicke Latky; Marhold; J. -;645;86               | J. Am. Coll. Toxicol. 5(3):205;1986                                                 |

## Model Applicability

Unknown features are fingerprint features in the query molecule, but not found or appearing too infrequently in the training set.

- All properties and OPS components are within expected ranges.

## Feature Contribution

### Top features for positive contribution

| Fingerprint | Bit/Smiles | Feature Structure                                                                                                                              | Score | Irritant in training set |
|-------------|------------|------------------------------------------------------------------------------------------------------------------------------------------------|-------|--------------------------|
| FCFP_12     | -879019572 | <p>AND Enantiomer</p> 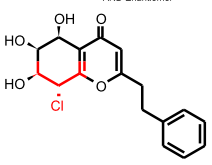 <p>[*]C([*])[C@@H](Cl)C(=O)[*]</p> | 0.199 | 15 out of 15             |



| FCFP_12                                | 436915834   | <p>AND Enantiomer</p> 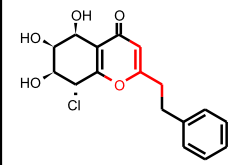 <p>[*]C\C(=C\[*])O[*]</p>                        | 0.167   | 4 out of 4               |
|----------------------------------------|-------------|------------------------------------------------------------------------------------------------------------------------------------------------------------|---------|--------------------------|
| FCFP_12                                | 32          | <p>AND Enantiomer</p>  <p>[*]Cl</p>                                     | 0.15    | 202 out of 215           |
| Top Features for negative contribution |             |                                                                                                                                                            |         |                          |
| Fingerprint                            | Bit/Smiles  | Feature Structure                                                                                                                                          | Score   | Irritant in training set |
| FCFP_12                                | 1981711554  | <p>AND Enantiomer</p>  <p>[*]CC[c]1:[cH]:[cH]:[cH]:[cH]:[cH]:1</p>      | -0.103  | 5 out of 7               |
| FCFP_12                                | -1698724694 | <p>AND Enantiomer</p>  <p>[*]C([*])[c]1:[cH]:[cH]:[cH]:[cH]:[cH]:1</p> | -0.0964 | 107 out of 146           |
| FCFP_12                                | 451847724   | <p>AND Enantiomer</p>  <p>[*]C(=CC(=[*])[*])[*]</p>                   | 0       | 161 out of 192           |

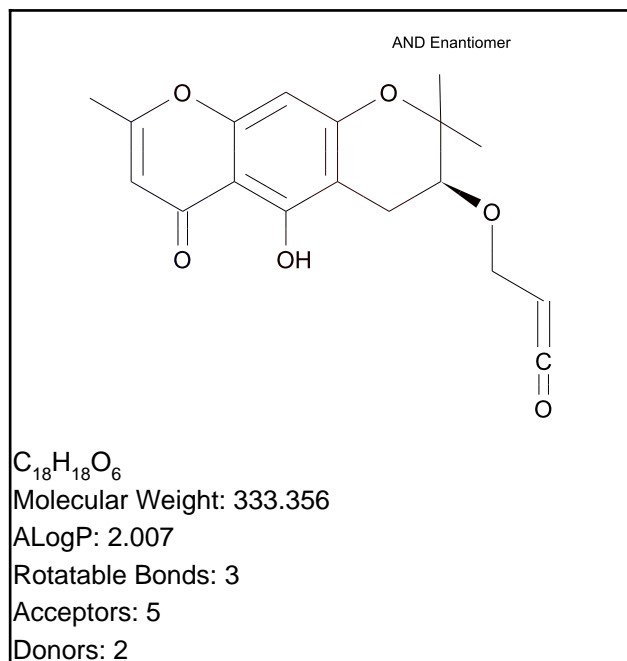

## Model Prediction

**Prediction: Irritant**

Probability: 1

Enrichment: 1.18

Bayesian Score: 0.818

Mahalanobis Distance: 8.34

Mahalanobis Distance p-value: 0.829

Prediction: Positive if the Bayesian score is above the estimated best cutoff value from minimizing the false positive and false negative rate.

Probability: The estimated probability that the sample is in the positive category. This assumes that the Bayesian score follows a normal distribution and is different from the prediction using a cutoff.

Enrichment: An estimate of enrichment, that is, the increased likelihood (versus random) of this sample being in the category.

Bayesian Score: The standard Laplacian-modified Bayesian score.

Mahalanobis Distance: The Mahalanobis distance (MD) is the distance to the center of the training data. The larger the MD, the less trustworthy the prediction.

Mahalanobis Distance p-value: The p-value gives the fraction of training data with an MD greater than or equal to the one for the given sample, assuming normally distributed data. The smaller the p-value, the less trustworthy the prediction. For highly non-normal X properties (e.g., fingerprints), the MD p-value is wildly inaccurate.

## Structural Similar Compounds

| Name               | 2;2';-Dihydroxy-4;4'-dimethoxybenzophenone                                          | ANTHRAQUINONE; 1-AMINO-4-HYDROXY-2-PHENOXY-                                         | 1-AMINO-4-BENZOYLAMINO-ANTHRAQUINONE                                                |
|--------------------|-------------------------------------------------------------------------------------|-------------------------------------------------------------------------------------|-------------------------------------------------------------------------------------|
| Structure          | 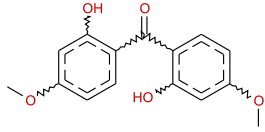 |  |  |
| Actual Endpoint    | Non-Irritant                                                                        | Irritant                                                                            | Irritant                                                                            |
| Predicted Endpoint | Non-Irritant                                                                        | Irritant                                                                            | Irritant                                                                            |
| Distance           | 0.568                                                                               | 0.595                                                                               | 0.599                                                                               |
| Reference          | J. Am. Coll. Toxicol. 2(5):35;1983                                                  | 28ZPAK 239;72                                                                       | 28ZPAK-;124;72                                                                      |

## Model Applicability

Unknown features are fingerprint features in the query molecule, but not found or appearing too infrequently in the training set.

- All properties and OPS components are within expected ranges.
- Unknown FCFP\_2 feature: 444624378: [\*]C=C=O

## Feature Contribution

| Top features for positive contribution |             |                                                                                                                                                                                                      |       |                          |
|----------------------------------------|-------------|------------------------------------------------------------------------------------------------------------------------------------------------------------------------------------------------------|-------|--------------------------|
| Fingerprint                            | Bit/Smiles  | Feature Structure                                                                                                                                                                                    | Score | Irritant in training set |
| FCFP_12                                | -1601875224 | <p style="text-align: center;">AND Enantiomer</p> 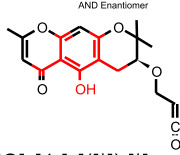 <p>[*]C[c]1:[c]([*]):[*]:[c]([*]):[c](C(=[*])[*]):[c]:1O</p> | 0.184 | 7 out of 7               |

|                                        |             |                                                                                                                                                             |         |                          |
|----------------------------------------|-------------|-------------------------------------------------------------------------------------------------------------------------------------------------------------|---------|--------------------------|
| FCFP_12                                | -1099193755 | <p>AND Enantiomer</p> 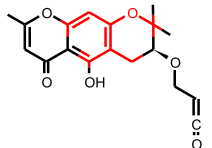 <p>[*]=C[c]1:[cH]:[*]:[cH]:[cH]:[c]:1OC</p>       | 0.175   | 5 out of 5               |
| FCFP_12                                | 436915834   | <p>AND Enantiomer</p>  <p>[*]C\C(=C\[*])\O[*]</p>                        | 0.167   | 4 out of 4               |
| Top Features for negative contribution |             |                                                                                                                                                             |         |                          |
| Fingerprint                            | Bit/Smiles  | Feature Structure                                                                                                                                           | Score   | Irritant in training set |
| FCFP_12                                | 1244036906  | <p>AND Enantiomer</p>  <p>[*][c](:[*]):[c]1C(=O)C=C([*])[*][c]:1:[*]</p> | -0.592  | 0 out of 1               |
| FCFP_12                                | 353886735   | <p>AND Enantiomer</p>  <p>[*]C([*])OCC=C=[*]</p>                        | -0.141  | 16 out of 23             |
| FCFP_12                                | -415216134  | <p>AND Enantiomer</p>  <p>[*]OC(C)(C)C([*])[*]</p>                     | -0.0889 | 11 out of 15             |

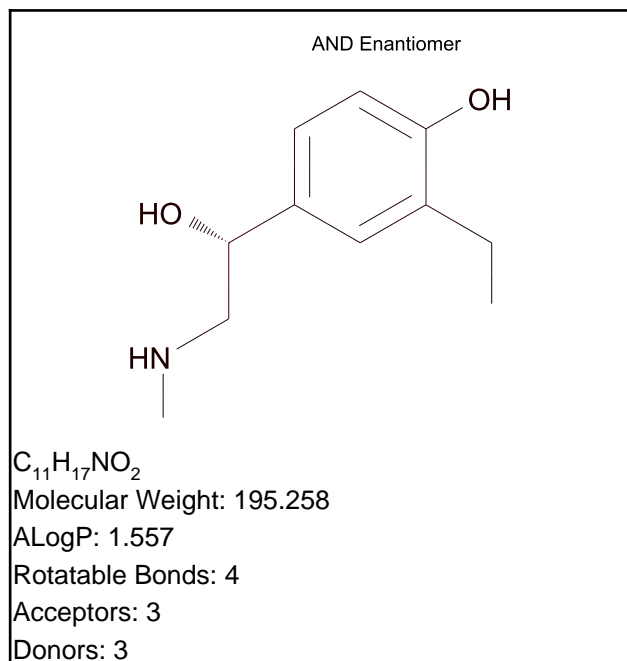

## Model Prediction

Prediction: Irritant

Probability: 1

Enrichment: 1.18

Bayesian Score: 2.06

Mahalanobis Distance: 5.13

Mahalanobis Distance p-value: 1

Prediction: Positive if the Bayesian score is above the estimated best cutoff value from minimizing the false positive and false negative rate.

Probability: The estimated probability that the sample is in the positive category. This assumes that the Bayesian score follows a normal distribution and is different from the prediction using a cutoff.

Enrichment: An estimate of enrichment, that is, the increased likelihood (versus random) of this sample being in the category.

Bayesian Score: The standard Laplacian-modified Bayesian score.

Mahalanobis Distance: The Mahalanobis distance (MD) is the distance to the center of the training data. The larger the MD, the less trustworthy the prediction.

Mahalanobis Distance p-value: The p-value gives the fraction of training data with an MD greater than or equal to the one for the given sample, assuming normally distributed data. The smaller the p-value, the less trustworthy the prediction. For highly non-normal X properties (e.g., fingerprints), the MD p-value is wildly inaccurate.

## Structural Similar Compounds

| Name               | 2:3-DIMETHYL;1;2;6-HEXANETRIOL                                                      | p-Phenylenediamine; N,N-bis(2-hydroxyethyl)-; sulfate (1:1)                         | 1-AMINO-3-AMINOMETHYL-3;5;5-TRIMETHYLCYCLOHEXANOL                                   |
|--------------------|-------------------------------------------------------------------------------------|-------------------------------------------------------------------------------------|-------------------------------------------------------------------------------------|
| Structure          | 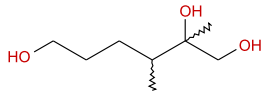 |  |  |
| Actual Endpoint    | Irritant                                                                            | Irritant                                                                            | Irritant                                                                            |
| Predicted Endpoint | Irritant                                                                            | Irritant                                                                            | Irritant                                                                            |
| Distance           | 0.610                                                                               | 0.639                                                                               | 0.641                                                                               |
| Reference          | AIHAAP 23;95;62                                                                     | Prehled Prumyslove Toxikologie; Organické Latky; Marhold; J. -;695;86               | AIHAAP 30;470;69                                                                    |

## Model Applicability

Unknown features are fingerprint features in the query molecule, but not found or appearing too infrequently in the training set.

1. All properties and OPS components are within expected ranges.

## Feature Contribution

### Top features for positive contribution

| Fingerprint | Bit/Smiles | Feature Structure                                                                                                                                            | Score | Irritant in training set |
|-------------|------------|--------------------------------------------------------------------------------------------------------------------------------------------------------------|-------|--------------------------|
| FCFP_12     | 1186393305 | <p>AND Enantiomer</p> 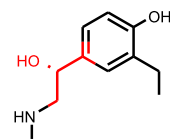 <p><chem>[*]C([*])(C@H)(O)[c]([*])[*]</chem></p> | 0.197 | 13 out of 13             |

|                                        |             |                                                                                                                                                                            |       |                          |
|----------------------------------------|-------------|----------------------------------------------------------------------------------------------------------------------------------------------------------------------------|-------|--------------------------|
| FCFP_12                                | -1931573337 | <p>AND Enantiomer</p> 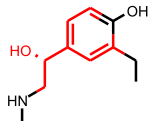 <p>[*]C([*])[C@H](O)[c]1<br/>:[cH]:[cH]:[*]:[cH]:<br/>[cH]:1</p> | 0.195 | 12 out of 12             |
| FCFP_12                                | -885550502  | <p>AND Enantiomer</p>  <p>[*]C([*])NC</p>                                               | 0.18  | 64 out of 66             |
| Top Features for negative contribution |             |                                                                                                                                                                            |       |                          |
| Fingerprint                            | Bit/Smiles  | Feature Structure                                                                                                                                                          | Score | Irritant in training set |
| FCFP_12                                | 0           | <p>AND Enantiomer</p>  <p>[*]C([*])[*]</p>                                              | 0     | 1184 out of 1397         |
| FCFP_12                                | 203677720   | <p>AND Enantiomer</p>  <p>[*]C([*])[c](:[cH]:[*]<br/>):[cH]:[*]</p>                   | 0     | 319 out of 382           |
| FCFP_12                                | 136597326   | <p>AND Enantiomer</p>  <p>[*]C([*])C</p>                                              | 0     | 612 out of 753           |

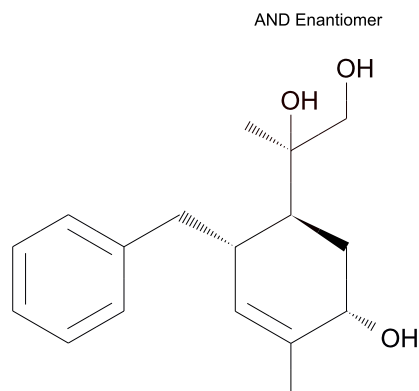
 $C_{17}H_{24}O_3$ 

Molecular Weight: 276.371

ALogP: 2.165

Rotatable Bonds: 4

Acceptors: 3

Donors: 3

## Model Prediction

**Prediction: Irritant**

Probability: 1

Enrichment: 1.18

Bayesian Score: 0.621

Mahalanobis Distance: 10.8

Mahalanobis Distance p-value: 0.0104

Prediction: Positive if the Bayesian score is above the estimated best cutoff value from minimizing the false positive and false negative rate.

Probability: The estimated probability that the sample is in the positive category. This assumes that the Bayesian score follows a normal distribution and is different from the prediction using a cutoff.

Enrichment: An estimate of enrichment, that is, the increased likelihood (versus random) of this sample being in the category.

Bayesian Score: The standard Laplacian-modified Bayesian score.

Mahalanobis Distance: The Mahalanobis distance (MD) is the distance to the center of the training data. The larger the MD, the less trustworthy the prediction.

Mahalanobis Distance p-value: The p-value gives the fraction of training data with an MD greater than or equal to the one for the given sample, assuming normally distributed data. The smaller the p-value, the less trustworthy the prediction. For highly non-normal X properties (e.g., fingerprints), the MD p-value is wildly inaccurate.

## Structural Similar Compounds

| Name               | METHANE;TRIS(4-AMINOPHENYL)- | ANTHRAQUINONE; 1-((2-HYDROXYETHYL)AMINO)-4-(METHYLAMINO)- | BENZOIN; OXIME |
|--------------------|------------------------------|-----------------------------------------------------------|----------------|
| Structure          |                              |                                                           |                |
| Actual Endpoint    | Irritant                     | Irritant                                                  | Irritant       |
| Predicted Endpoint | Irritant                     | Irritant                                                  | Irritant       |
| Distance           | 0.560                        | 0.648                                                     | 0.678          |
| Reference          | 28ZPAK-;73;72                | 28ZPAK 245;72                                             | 28ZPAK-;111;72 |

## Model Applicability

Unknown features are fingerprint features in the query molecule, but not found or appearing too infrequently in the training set.

1. All properties and OPS components are within expected ranges.

## Feature Contribution

### Top features for positive contribution

| Fingerprint | Bit/Smiles | Feature Structure                                      | Score | Irritant in training set |
|-------------|------------|--------------------------------------------------------|-------|--------------------------|
| FCFP_12     | -415156552 | <p>AND Enantiomer</p> <p>[*]C[C@](C)(O)C([*])([*])</p> | 0.184 | 7 out of 7               |

|                                        |             |                                                                                                                                                                   |         |                          |
|----------------------------------------|-------------|-------------------------------------------------------------------------------------------------------------------------------------------------------------------|---------|--------------------------|
| FCFP_12                                | 1070061035  | <p>AND Enantiomer</p> 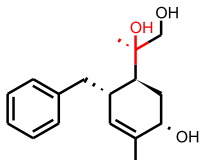 <p>[*]C([*])O</p>                                       | 0.107   | 338 out of 376           |
| FCFP_12                                | 3           | <p>AND Enantiomer</p>  <p>[*]O</p>                                             | 0.105   | 491 out of 547           |
| Top Features for negative contribution |             |                                                                                                                                                                   |         |                          |
| Fingerprint                            | Bit/Smiles  | Feature Structure                                                                                                                                                 | Score   | Irritant in training set |
| FCFP_12                                | -59531427   | <p>AND Enantiomer</p>  <p>[*]C@H1[*]=C([*])(C@@H)(O)C[C@@H]1C([*])([*])[*]</p> | -0.156  | 4 out of 6               |
| FCFP_12                                | 1981711554  | <p>AND Enantiomer</p>  <p>[*]CC[c]1:[cH]:[cH]:[cH]:[cH]:[cH]:[cH]:1</p>       | -0.103  | 5 out of 7               |
| FCFP_12                                | -1698724694 | <p>AND Enantiomer</p>  <p>[*]C([*])[c]1:[cH]:[cH]:[cH]:[cH]:[cH]:[cH]:1</p>  | -0.0964 | 107 out of 146           |

# Simeprevir

# TOPKAT\_Ocular\_Irritancy\_None\_vs\_Irritant

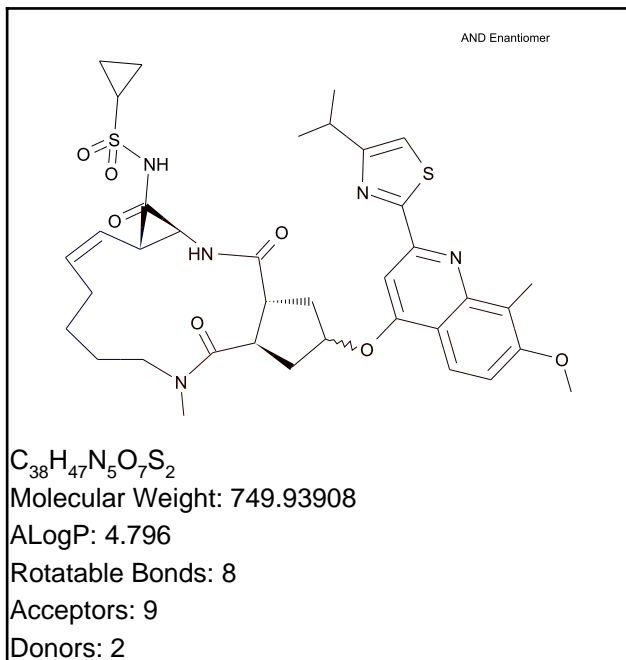

## Model Prediction

Prediction: Irritant

Probability: 1

Enrichment: 1.18

Bayesian Score: 1.81

Mahalanobis Distance: 16.5

Mahalanobis Distance p-value: 1.59e-019

Prediction: Positive if the Bayesian score is above the estimated best cutoff value from minimizing the false positive and false negative rate.

Probability: The estimated probability that the sample is in the positive category. This assumes that the Bayesian score follows a normal distribution and is different from the prediction using a cutoff.

Enrichment: An estimate of enrichment, that is, the increased likelihood (versus random) of this sample being in the category.

Bayesian Score: The standard Laplacian-modified Bayesian score.

Mahalanobis Distance: The Mahalanobis distance (MD) is the distance to the center of the training data. The larger the MD, the less trustworthy the prediction.

Mahalanobis Distance p-value: The p-value gives the fraction of training data with an MD greater than or equal to the one for the given sample, assuming normally distributed data. The smaller the p-value, the less trustworthy the prediction. For highly non-normal X properties (e.g., fingerprints), the MD p-value is wildly inaccurate.

## Structural Similar Compounds

| Name               | Anthraquinone; 1;1'-(anthraquinon-1;5-ylenediimino)di-                              | Anthraquinone; 1;1'-(anthraquinon-1;4-ylenediimino)di-                              | ANILINE;N;N'-1;4-ANTHRAQUINONYLENEBIS(4-PHENOXY)-                                   |
|--------------------|-------------------------------------------------------------------------------------|-------------------------------------------------------------------------------------|-------------------------------------------------------------------------------------|
| Structure          | 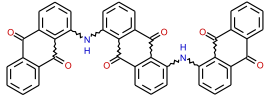 |  |  |
| Actual Endpoint    | Irritant                                                                            | Irritant                                                                            | Non-Irritant                                                                        |
| Predicted Endpoint | Irritant                                                                            | Irritant                                                                            | Non-Irritant                                                                        |
| Distance           | 0.837                                                                               | 0.838                                                                               | 1.053                                                                               |
| Reference          | Prehled Prumyslove Toxikologie; Organicke Latky; Marhold; J. pp 736;86              | Prehled Prumyslove Toxikologie; Organicke Latky; Marhold; J. pp 736;86              | 28ZPAK-;114;72                                                                      |

## Model Applicability

Unknown features are fingerprint features in the query molecule, but not found or appearing too infrequently in the training set.

1. All properties and OPS components are within expected ranges.

## Feature Contribution

### Top features for positive contribution

| Fingerprint | Bit/Smiles | Feature Structure                                                                                                                  | Score | Irritant in training set |
|-------------|------------|------------------------------------------------------------------------------------------------------------------------------------|-------|--------------------------|
| FCFP_12     | 1747237384 | 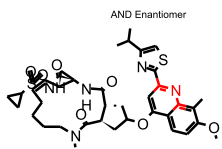<br><chem>[*][c](:[*]):n:[c](:[*]):[*]</chem> | 0.208 | 44 out of 44             |



|                                        |             |                                                                                                                                                         |        |                          |
|----------------------------------------|-------------|---------------------------------------------------------------------------------------------------------------------------------------------------------|--------|--------------------------|
| FCFP_12                                | 178336375   | <p>AND Enantiomer</p> 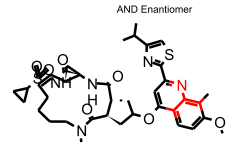 <p>[*][c](:[*]):[c](:n:[*]):[c](:[*]):[*]</p> | 0.202  | 19 out of 19             |
| FCFP_12                                | -124655670  | <p>AND Enantiomer</p>  <p>[*][c]1:[*]:[*]:s:[cH]:1</p>               | 0.2    | 16 out of 16             |
| Top Features for negative contribution |             |                                                                                                                                                         |        |                          |
| Fingerprint                            | Bit/Smiles  | Feature Structure                                                                                                                                       | Score  | Irritant in training set |
| FCFP_12                                | -1812846456 | <p>AND Enantiomer</p>  <p>[*]CCCC(C=C/C1[*])[*]1</p>                 | -1.01  | 2 out of 9               |
| FCFP_12                                | 690511177   | <p>AND Enantiomer</p>  <p>[*]:[cH]:[c](:n:[*])[c](:[*]):[*]</p>    | -0.268 | 1 out of 2               |
| FCFP_12                                | 1175638033  | <p>AND Enantiomer</p>  <p>[*]CCCCC=[*]</p>                         | -0.133 | 207 out of 293           |

AND Enantiomer

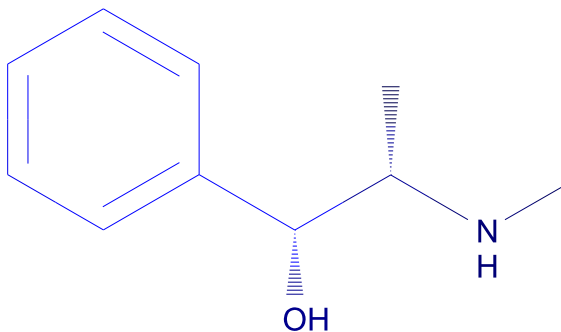 $C_{10}H_{15}NO$ 

Molecular Weight: 165.232

ALogP: 1.234

Rotatable Bonds: 3

Acceptors: 2

Donors: 2

**Model Prediction**

Prediction: Non-Carcinogen

Probability: 0.192

Enrichment: 0.595

Bayesian Score: -8.3

Mahalanobis Distance: 9.66

Mahalanobis Distance p-value: 0.53

Prediction: Positive if the Bayesian score is above the estimated best cutoff value from minimizing the false positive and false negative rate.

Probability: The estimated probability that the sample is in the positive category. This assumes that the Bayesian score follows a normal distribution and is different from the prediction using a cutoff.

Enrichment: An estimate of enrichment, that is, the increased likelihood (versus random) of this sample being in the category.

Bayesian Score: The standard Laplacian-modified Bayesian score.

Mahalanobis Distance: The Mahalanobis distance (MD) is the distance to the center of the training data. The larger the MD, the less trustworthy the prediction.

Mahalanobis Distance p-value: The p-value gives the fraction of training data with an MD greater than or equal to the one for the given sample, assuming normally distributed data. The smaller the p-value, the less trustworthy the prediction. For highly non-normal X properties (e.g., fingerprints), the MD p-value is wildly inaccurate.

**Structural Similar Compounds**

| Name               | Ephedrine                                                           | Tocainide                                                           | Amphetamine                                                         |
|--------------------|---------------------------------------------------------------------|---------------------------------------------------------------------|---------------------------------------------------------------------|
| Structure          |                                                                     |                                                                     |                                                                     |
| Actual Endpoint    | Non-Carcinogen                                                      | Non-Carcinogen                                                      | Non-Carcinogen                                                      |
| Predicted Endpoint | Non-Carcinogen                                                      | Carcinogen                                                          | Non-Carcinogen                                                      |
| Distance           | 0.000                                                               | 0.554                                                               | 0.573                                                               |
| Reference          | US FDA (Centre for Drug Eval.& Res./Off. Testing & Res.) Sept. 1997 | US FDA (Centre for Drug Eval.& Res./Off. Testing & Res.) Sept. 1997 | US FDA (Centre for Drug Eval.& Res./Off. Testing & Res.) Sept. 1997 |

**Model Applicability**

Unknown features are fingerprint features in the query molecule, but not found or appearing too infrequently in the training set.

1. All properties and OPS components are within expected ranges.

**Feature Contribution****Top features for positive contribution**

| Fingerprint | Bit/Smiles | Feature Structure | Score  | Carcinogen in training set |
|-------------|------------|-------------------|--------|----------------------------|
| ECFP_12     | 734603939  | <p>[*]C</p>       | 0.0966 | 92 out of 267              |

**Top Features for negative contribution**

| Fingerprint | Bit/Smiles | Feature Structure | Score | Carcinogen in training set |
|-------------|------------|-------------------|-------|----------------------------|
|             |            |                   |       |                            |

|         |            |                                                                                                                                                                            |        |             |
|---------|------------|----------------------------------------------------------------------------------------------------------------------------------------------------------------------------|--------|-------------|
| ECFP_12 | -388186450 | <p>AND Enantiomer</p> 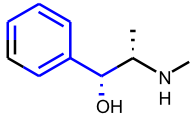 <p>[*]C([*])[c]1:[cH]:[*]<br/>]:[cH]:[cH]:[cH]:1</p>             | -1.68  | 0 out of 14 |
| ECFP_12 | 2014710090 | <p>AND Enantiomer</p>  <p>[*]C([*])[c]1:[cH]:[c<br/>H]:[cH]:[cH]:[cH]:1</p>             | -1.56  | 0 out of 12 |
| ECFP_12 | -221133010 | <p>AND Enantiomer</p>  <p>[*]C([*])[C@H](O)[c]1<br/>:[cH]:[cH]:[*]:[cH]:<br/>[cH]:1</p> | -0.661 | 0 out of 3  |

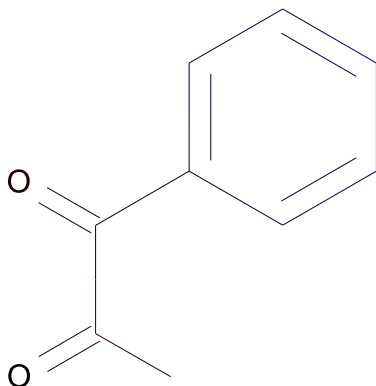C<sub>9</sub>H<sub>8</sub>O<sub>2</sub>

Molecular Weight: 148.159

ALogP: 1.446

Rotatable Bonds: 2

Acceptors: 2

Donors: 0

## Model Prediction

**Prediction: Carcinogen**

Probability: 0.298

Enrichment: 0.926

Bayesian Score: -0.0178

Mahalanobis Distance: 10.1

Mahalanobis Distance p-value: 0.321

Prediction: Positive if the Bayesian score is above the estimated best cutoff value from minimizing the false positive and false negative rate.

Probability: The estimated probability that the sample is in the positive category. This assumes that the Bayesian score follows a normal distribution and is different from the prediction using a cutoff.

Enrichment: An estimate of enrichment, that is, the increased likelihood (versus random) of this sample being in the category.

Bayesian Score: The standard Laplacian-modified Bayesian score.

Mahalanobis Distance: The Mahalanobis distance (MD) is the distance to the center of the training data. The larger the MD, the less trustworthy the prediction.

Mahalanobis Distance p-value: The p-value gives the fraction of training data with an MD greater than or equal to the one for the given sample, assuming normally distributed data. The smaller the p-value, the less trustworthy the prediction. For highly non-normal X properties (e.g., fingerprints), the MD p-value is wildly inaccurate.

## Structural Similar Compounds

| Name               | Coumarin                                                            | Amphetamine                                                         | Phenacetin                                                          |
|--------------------|---------------------------------------------------------------------|---------------------------------------------------------------------|---------------------------------------------------------------------|
| Structure          |                                                                     |                                                                     |                                                                     |
| Actual Endpoint    | Non-Carcinogen                                                      | Non-Carcinogen                                                      | Carcinogen                                                          |
| Predicted Endpoint | Carcinogen                                                          | Non-Carcinogen                                                      | Carcinogen                                                          |
| Distance           | 0.570                                                               | 0.579                                                               | 0.590                                                               |
| Reference          | US FDA (Centre for Drug Eval.& Res./Off. Testing & Res.) Sept. 1997 | US FDA (Centre for Drug Eval.& Res./Off. Testing & Res.) Sept. 1997 | US FDA (Centre for Drug Eval.& Res./Off. Testing & Res.) Sept. 1997 |

## Model Applicability

Unknown features are fingerprint features in the query molecule, but not found or appearing too infrequently in the training set.

1. All properties and OPS components are within expected ranges.
2. Unknown ECFP\_2 feature: -472613004: [\*]C(=[\*])C(=O)C

## Feature Contribution

### Top features for positive contribution

| Fingerprint | Bit/Smiles | Feature Structure                                              | Score | Carcinogen in training set |
|-------------|------------|----------------------------------------------------------------|-------|----------------------------|
| ECFP_12     | 169261700  | <br><chem>[*]C(=[*])C(=O)[c]1:[cH]:[cH]:[*]:[cH]:[cH]:1</chem> | 0.421 | 1 out of 1                 |

| ECFP_12                                | 1432101658 | 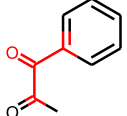<br><chem>[*]C(=[*])C(=O)[c]([*])</chem>             | 0.208  | 1 out of 2                 |
|----------------------------------------|------------|-----------------------------------------------------------------------------------------------------------------------------------------|--------|----------------------------|
| ECFP_12                                | 866218936  | <br><chem>[*]C(=[*])C</chem>                         | 0.196  | 12 out of 31               |
| Top Features for negative contribution |            |                                                                                                                                         |        |                            |
| Fingerprint                            | Bit/Smiles | Feature Structure                                                                                                                       | Score  | Carcinogen in training set |
| ECFP_12                                | 1571214559 | <br><chem>[*]1:[cH]:[cH]:[cH]:[cH]:[cH]:1</chem>     | -0.56  | 11 out of 64               |
| ECFP_12                                | -281505363 | <br><chem>[*][c]1:[cH]:[cH]:[cH]:[cH]:[cH]:1</chem> | -0.56  | 11 out of 64               |
| ECFP_12                                | 1997021792 | <br><chem>[*]:[cH]:[cH]:[cH]:[*]</chem>            | -0.296 | 36 out of 156              |

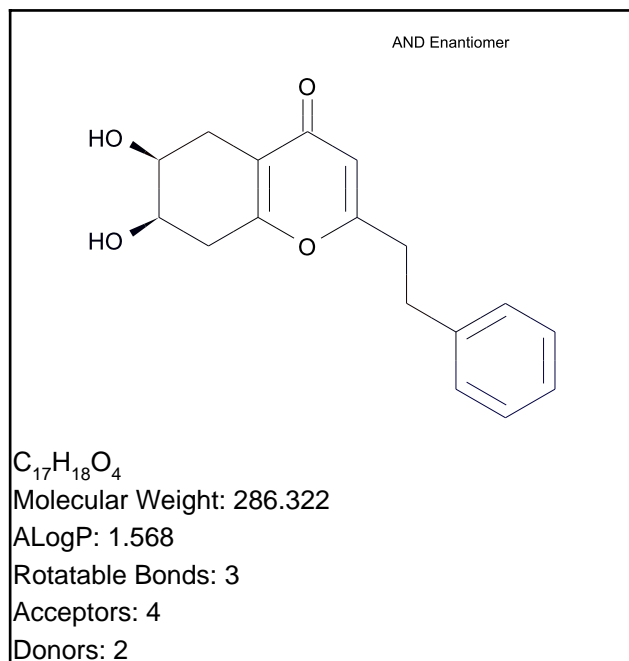

### Model Prediction

Prediction: Carcinogen

Probability: 0.27

Enrichment: 0.838

Bayesian Score: -1.53

Mahalanobis Distance: 10.2

Mahalanobis Distance p-value: 0.265

Prediction: Positive if the Bayesian score is above the estimated best cutoff value from minimizing the false positive and false negative rate.

Probability: The estimated probability that the sample is in the positive category. This assumes that the Bayesian score follows a normal distribution and is different from the prediction using a cutoff.

Enrichment: An estimate of enrichment, that is, the increased likelihood (versus random) of this sample being in the category.

Bayesian Score: The standard Laplacian-modified Bayesian score.

Mahalanobis Distance: The Mahalanobis distance (MD) is the distance to the center of the training data. The larger the MD, the less trustworthy the prediction.

Mahalanobis Distance p-value: The p-value gives the fraction of training data with an MD greater than or equal to the one for the given sample, assuming normally distributed data. The smaller the p-value, the less trustworthy the prediction. For highly non-normal X properties (e.g., fingerprints), the MD p-value is wildly inaccurate.

### Structural Similar Compounds

| Name               | Tolazamide                                                                          | Naltrexone                                                                          | Doxefazepam                                                                         |
|--------------------|-------------------------------------------------------------------------------------|-------------------------------------------------------------------------------------|-------------------------------------------------------------------------------------|
| Structure          | 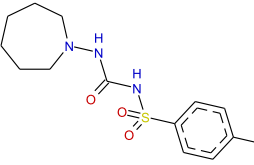 |  |  |
| Actual Endpoint    | Non-Carcinogen                                                                      | Non-Carcinogen                                                                      | Carcinogen                                                                          |
| Predicted Endpoint | Non-Carcinogen                                                                      | Non-Carcinogen                                                                      | Carcinogen                                                                          |
| Distance           | 0.566                                                                               | 0.611                                                                               | 0.616                                                                               |
| Reference          | US FDA (Centre for Drug Eval.& Res./Off. Testing & Res.) Sept. 1997                 | US FDA (Centre for Drug Eval.& Res./Off. Testing & Res.) Sept. 1997                 | US FDA (Centre for Drug Eval.& Res./Off. Testing & Res.) Sept. 1997                 |

### Model Applicability

Unknown features are fingerprint features in the query molecule, but not found or appearing too infrequently in the training set.

1. All properties and OPS components are within expected ranges.
2. Unknown ECFP\_2 feature: 1794461805: [\*]CC(=C([\*])[\*])C(=[\*])[\*]
3. Unknown ECFP\_2 feature: 1650944136: [\*]CC(=C([\*])[\*])O[\*]

### Feature Contribution

#### Top features for positive contribution

| Fingerprint | Bit/Smiles | Feature Structure                                                                                                                                                                | Score | Carcinogen in training set |
|-------------|------------|----------------------------------------------------------------------------------------------------------------------------------------------------------------------------------|-------|----------------------------|
| ECFP_12     | 53207596   | <p style="text-align: center;">AND Enantiomer</p> 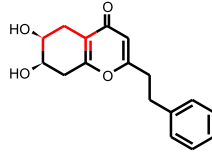 <p><chem>[*]C([*])CC(=[*])[*]</chem></p> | 0.459 | 8 out of 15                |

|                                        |             |                                                                                                                                                      |        |                            |
|----------------------------------------|-------------|------------------------------------------------------------------------------------------------------------------------------------------------------|--------|----------------------------|
| ECFP_12                                | 683445015   | <p>AND Enantiomer</p> 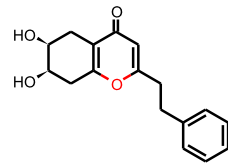 <p>[*]O[*]</p>                             | 0.294  | 28 out of 66               |
| ECFP_12                                | -1650219925 | <p>AND Enantiomer</p>  <p>[*]C[c]1:[cH]:[cH]:[cH]:[cH]:[cH]:1</p> | 0.208  | 6 out of 15                |
| Top Features for negative contribution |             |                                                                                                                                                      |        |                            |
| Fingerprint                            | Bit/Smiles  | Feature Structure                                                                                                                                    | Score  | Carcinogen in training set |
| ECFP_12                                | -281505363  | <p>AND Enantiomer</p>  <p>[*][c]1:[cH]:[cH]:[cH]:[cH]:[cH]:1</p>  | -0.56  | 11 out of 64               |
| ECFP_12                                | 1571214559  | <p>AND Enantiomer</p>  <p>[*]1:[cH]:[cH]:[cH]:[cH]:[cH]:1</p>    | -0.56  | 11 out of 64               |
| ECFP_12                                | 1997021792  | <p>AND Enantiomer</p>  <p>[*]:[cH]:[cH]:[cH]:[*]</p>            | -0.296 | 36 out of 156              |

AND Enantiomer

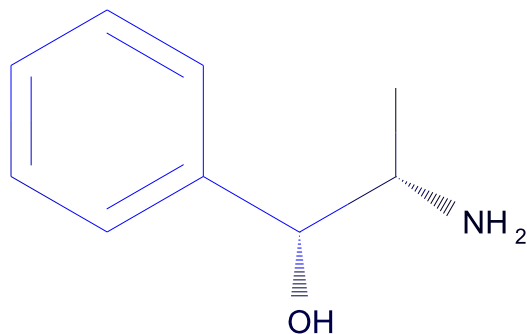 $C_9H_{13}NO$ 

Molecular Weight: 151.206

ALogP: 0.802

Rotatable Bonds: 2

Acceptors: 2

Donors: 2

**Model Prediction**

Prediction: Non-Carcinogen

Probability: 0.202

Enrichment: 0.627

Bayesian Score: -6.96

Mahalanobis Distance: 10.8

Mahalanobis Distance p-value: 0.0982

Prediction: Positive if the Bayesian score is above the estimated best cutoff value from minimizing the false positive and false negative rate.

Probability: The estimated probability that the sample is in the positive category. This assumes that the Bayesian score follows a normal distribution and is different from the prediction using a cutoff.

Enrichment: An estimate of enrichment, that is, the increased likelihood (versus random) of this sample being in the category.

Bayesian Score: The standard Laplacian-modified Bayesian score.

Mahalanobis Distance: The Mahalanobis distance (MD) is the distance to the center of the training data. The larger the MD, the less trustworthy the prediction.

Mahalanobis Distance p-value: The p-value gives the fraction of training data with an MD greater than or equal to the one for the given sample, assuming normally distributed data. The smaller the p-value, the less trustworthy the prediction. For highly non-normal X properties (e.g., fingerprints), the MD p-value is wildly inaccurate.

**Structural Similar Compounds**

| Name               | Ephedrine                                                           | Tocainide                                                           | Acetaminophen                                                       |
|--------------------|---------------------------------------------------------------------|---------------------------------------------------------------------|---------------------------------------------------------------------|
| Structure          |                                                                     |                                                                     |                                                                     |
| Actual Endpoint    | Non-Carcinogen                                                      | Non-Carcinogen                                                      | Carcinogen                                                          |
| Predicted Endpoint | Non-Carcinogen                                                      | Carcinogen                                                          | Carcinogen                                                          |
| Distance           | 0.398                                                               | 0.508                                                               | 0.525                                                               |
| Reference          | US FDA (Centre for Drug Eval.& Res./Off. Testing & Res.) Sept. 1997 | US FDA (Centre for Drug Eval.& Res./Off. Testing & Res.) Sept. 1997 | US FDA (Centre for Drug Eval.& Res./Off. Testing & Res.) Sept. 1997 |

**Model Applicability**

Unknown features are fingerprint features in the query molecule, but not found or appearing too infrequently in the training set.

1. All properties and OPS components are within expected ranges.
2. Unknown ECFP\_2 feature: -261056708: [\*]C([\*])[C@H](C)N

**Feature Contribution****Top features for positive contribution**

| Fingerprint | Bit/Smiles | Feature Structure                              | Score  | Carcinogen in training set |
|-------------|------------|------------------------------------------------|--------|----------------------------|
| ECFP_12     | 734603939  | <p>AND Enantiomer</p> <p><chem>[*]C</chem></p> | 0.0966 | 92 out of 267              |

**Top Features for negative contribution**



| Fingerprint | Bit/Smiles | Feature Structure                                                                                                                                                     | Score  | Carcinogen in training set |
|-------------|------------|-----------------------------------------------------------------------------------------------------------------------------------------------------------------------|--------|----------------------------|
| ECFP_12     | -388186450 | <p>AND Enantiomer</p> 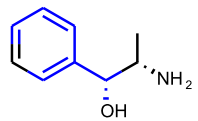 <p><chem>[*]C([*])[c]1:[cH]:[*]:[cH]:[cH]:[cH]:1</chem></p> | -1.68  | 0 out of 14                |
| ECFP_12     | 2014710090 | <p>AND Enantiomer</p>  <p><chem>[*]C([*])[c]1:[cH]:[cH]:[cH]:[cH]:1</chem></p>     | -1.56  | 0 out of 12                |
| ECFP_12     | -221133010 | <p>AND Enantiomer</p>  <p><chem>[*]C([*])[C@H](O)[c]1:[cH]:[cH]:[cH]:1</chem></p>  | -0.661 | 0 out of 3                 |

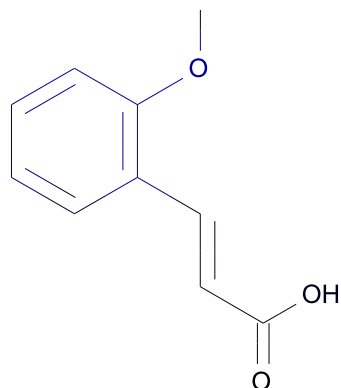C<sub>10</sub>H<sub>10</sub>O<sub>3</sub>

Molecular Weight: 178.185

ALogP: 1.911

Rotatable Bonds: 3

Acceptors: 3

Donors: 1

## Model Prediction

Prediction: Non-Carcinogen

Probability: 0.234

Enrichment: 0.728

Bayesian Score: -3.9

Mahalanobis Distance: 8.83

Mahalanobis Distance p-value: 0.871

Prediction: Positive if the Bayesian score is above the estimated best cutoff value from minimizing the false positive and false negative rate.

Probability: The estimated probability that the sample is in the positive category. This assumes that the Bayesian score follows a normal distribution and is different from the prediction using a cutoff.

Enrichment: An estimate of enrichment, that is, the increased likelihood (versus random) of this sample being in the category.

Bayesian Score: The standard Laplacian-modified Bayesian score.

Mahalanobis Distance: The Mahalanobis distance (MD) is the distance to the center of the training data. The larger the MD, the less trustworthy the prediction.

Mahalanobis Distance p-value: The p-value gives the fraction of training data with an MD greater than or equal to the one for the given sample, assuming normally distributed data. The smaller the p-value, the less trustworthy the prediction. For highly non-normal X properties (e.g., fingerprints), the MD p-value is wildly inaccurate.

## Structural Similar Compounds

| Name               | Aspirin                                                             | Naproxen                                                            | Phenacetin                                                          |
|--------------------|---------------------------------------------------------------------|---------------------------------------------------------------------|---------------------------------------------------------------------|
| Structure          |                                                                     |                                                                     |                                                                     |
| Actual Endpoint    | Non-Carcinogen                                                      | Non-Carcinogen                                                      | Carcinogen                                                          |
| Predicted Endpoint | Non-Carcinogen                                                      | Non-Carcinogen                                                      | Carcinogen                                                          |
| Distance           | 0.532                                                               | 0.564                                                               | 0.565                                                               |
| Reference          | US FDA (Centre for Drug Eval.& Res./Off. Testing & Res.) Sept. 1997 | US FDA (Centre for Drug Eval.& Res./Off. Testing & Res.) Sept. 1997 | US FDA (Centre for Drug Eval.& Res./Off. Testing & Res.) Sept. 1997 |

## Model Applicability

Unknown features are fingerprint features in the query molecule, but not found or appearing too infrequently in the training set.

1. All properties and OPS components are within expected ranges.
2. Unknown ECFP\_2 feature: 1335702447: [\*][c](:[\*]):[c](C=[\*]):c:[\*]

## Feature Contribution

### Top features for positive contribution

| Fingerprint | Bit/Smiles | Feature Structure | Score | Carcinogen in training set |
|-------------|------------|-------------------|-------|----------------------------|
| ECFP_12     | 1905093414 | <br>[*]=CC(=O)O   | 0.437 | 2 out of 3                 |

| ECFP_12                                | -1925046727 | 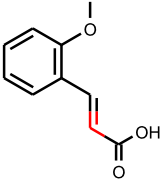<br><chem>[*]C=[*]</chem>                                   | 0.407  | 16 out of 33               |
|----------------------------------------|-------------|------------------------------------------------------------------------------------------------------------------------------------------------|--------|----------------------------|
| ECFP_12                                | -470416293  | <br><chem>[*]C=C\C(=[*])[*]</chem>                          | 0.158  | 2 out of 5                 |
| Top Features for negative contribution |             |                                                                                                                                                |        |                            |
| Fingerprint                            | Bit/Smiles  | Feature Structure                                                                                                                              | Score  | Carcinogen in training set |
| ECFP_12                                | 1634699529  | <br><chem>[*]O[c]1:[cH]:[cH]:[cH]:[*]:[c]:[c]:1[*]</chem>   | -1.25  | 0 out of 8                 |
| ECFP_12                                | -1961666573 | <br><chem>[*]O[c]1:[cH]:[cH]:[cH]:[cH]:[c]:[c]:1[*]</chem> | -0.661 | 0 out of 3                 |
| ECFP_12                                | 1408898974  | <br><chem>[*]O[c](:[cH]:[*]):[c]l([*]):[*]</chem>         | -0.517 | 5 out of 29                |

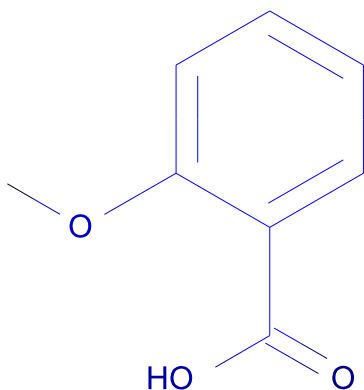
 $C_8H_8O_3$ 

Molecular Weight: 152.147

ALogP: 1.443

Rotatable Bonds: 2

Acceptors: 3

Donors: 1

## Model Prediction

Prediction: Non-Carcinogen

Probability: 0.183

Enrichment: 0.568

Bayesian Score: -9.75

Mahalanobis Distance: 8.08

Mahalanobis Distance p-value: 0.984

Prediction: Positive if the Bayesian score is above the estimated best cutoff value from minimizing the false positive and false negative rate.

Probability: The estimated probability that the sample is in the positive category. This assumes that the Bayesian score follows a normal distribution and is different from the prediction using a cutoff.

Enrichment: An estimate of enrichment, that is, the increased likelihood (versus random) of this sample being in the category.

Bayesian Score: The standard Laplacian-modified Bayesian score.

Mahalanobis Distance: The Mahalanobis distance (MD) is the distance to the center of the training data. The larger the MD, the less trustworthy the prediction.

Mahalanobis Distance p-value: The p-value gives the fraction of training data with an MD greater than or equal to the one for the given sample, assuming normally distributed data. The smaller the p-value, the less trustworthy the prediction. For highly non-normal X properties (e.g., fingerprints), the MD p-value is wildly inaccurate.

## Structural Similar Compounds

| Name               | Aspirin                                                             | Phenacetin                                                          | Ethionamide                                                         |
|--------------------|---------------------------------------------------------------------|---------------------------------------------------------------------|---------------------------------------------------------------------|
| Structure          |                                                                     |                                                                     |                                                                     |
| Actual Endpoint    | Non-Carcinogen                                                      | Carcinogen                                                          | Non-Carcinogen                                                      |
| Predicted Endpoint | Non-Carcinogen                                                      | Carcinogen                                                          | Non-Carcinogen                                                      |
| Distance           | 0.351                                                               | 0.601                                                               | 0.606                                                               |
| Reference          | US FDA (Centre for Drug Eval.& Res./Off. Testing & Res.) Sept. 1997 | US FDA (Centre for Drug Eval.& Res./Off. Testing & Res.) Sept. 1997 | US FDA (Centre for Drug Eval.& Res./Off. Testing & Res.) Sept. 1997 |

## Model Applicability

Unknown features are fingerprint features in the query molecule, but not found or appearing too infrequently in the training set.

1. All properties and OPS components are within expected ranges.

## Feature Contribution

### Top features for positive contribution

| Fingerprint | Bit/Smiles  | Feature Structure | Score | Carcinogen in training set |
|-------------|-------------|-------------------|-------|----------------------------|
| ECFP_12     | -1074141656 | <br>[*]=O         | 0.103 | 86 out of 248              |

| ECFP_12                                | 734603939  | 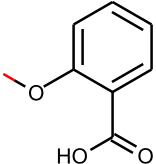<br><chem>[*]C</chem>                                 | 0.0966 | 92 out of 267              |
|----------------------------------------|------------|------------------------------------------------------------------------------------------------------------------------------------------|--------|----------------------------|
| Top Features for negative contribution |            |                                                                                                                                          |        |                            |
| Fingerprint                            | Bit/Smiles | Feature Structure                                                                                                                        | Score  | Carcinogen in training set |
| ECFP_12                                | 1337040050 | <br><chem>[*]C(=[*])[c](:[cH]:[*])[c]([*]):[*]</chem> | -1.84  | 0 out of 17                |
| ECFP_12                                | 1634699529 | <br><chem>[*]O[c]1:[cH]:[cH]:[cH]:[*]:[c]:1[*]</chem> | -1.25  | 0 out of 8                 |
| ECFP_12                                | 989674687  | <br><chem>[*][c](:[*]):[c](:[cH]:[*])C(=O)O</chem>   | -1.16  | 0 out of 7                 |

AND Enantiomer

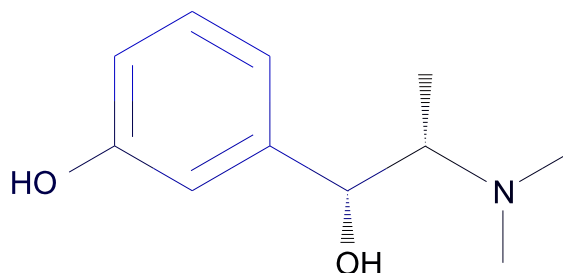C<sub>11</sub>H<sub>17</sub>NO<sub>2</sub>

Molecular Weight: 195.258

ALogP: 1.528

Rotatable Bonds: 3

Acceptors: 3

Donors: 2

## Model Prediction

Prediction: Non-Carcinogen

Probability: 0.22

Enrichment: 0.682

Bayesian Score: -5.13

Mahalanobis Distance: 12.4

Mahalanobis Distance p-value: 0.00149

Prediction: Positive if the Bayesian score is above the estimated best cutoff value from minimizing the false positive and false negative rate.

Probability: The estimated probability that the sample is in the positive category. This assumes that the Bayesian score follows a normal distribution and is different from the prediction using a cutoff.

Enrichment: An estimate of enrichment, that is, the increased likelihood (versus random) of this sample being in the category.

Bayesian Score: The standard Laplacian-modified Bayesian score.

Mahalanobis Distance: The Mahalanobis distance (MD) is the distance to the center of the training data. The larger the MD, the less trustworthy the prediction.

Mahalanobis Distance p-value: The p-value gives the fraction of training data with an MD greater than or equal to the one for the given sample, assuming normally distributed data. The smaller the p-value, the less trustworthy the prediction. For highly non-normal X properties (e.g., fingerprints), the MD p-value is wildly inaccurate.

## Structural Similar Compounds

| Name               | Ephedrine                                                           | Phenylephrine                                                       | Tocainide                                                           |
|--------------------|---------------------------------------------------------------------|---------------------------------------------------------------------|---------------------------------------------------------------------|
| Structure          |                                                                     |                                                                     |                                                                     |
| Actual Endpoint    | Non-Carcinogen                                                      | Non-Carcinogen                                                      | Non-Carcinogen                                                      |
| Predicted Endpoint | Non-Carcinogen                                                      | Non-Carcinogen                                                      | Carcinogen                                                          |
| Distance           | 0.495                                                               | 0.523                                                               | 0.563                                                               |
| Reference          | US FDA (Centre for Drug Eval.& Res./Off. Testing & Res.) Sept. 1997 | US FDA (Centre for Drug Eval.& Res./Off. Testing & Res.) Sept. 1997 | US FDA (Centre for Drug Eval.& Res./Off. Testing & Res.) Sept. 1997 |

## Model Applicability

Unknown features are fingerprint features in the query molecule, but not found or appearing too infrequently in the training set.

1. All properties and OPS components are within expected ranges.
2. Unknown ECFP\_2 feature: -1280034494: [\*]C([\*])[C@H](C)N([\*])[\*]

## Feature Contribution

### Top features for positive contribution

| Fingerprint | Bit/Smiles  | Feature Structure                                                                                                                                       | Score | Carcinogen in training set |
|-------------|-------------|---------------------------------------------------------------------------------------------------------------------------------------------------------|-------|----------------------------|
| ECFP_12     | -1235570483 | <p>AND Enantiomer</p> <p>HO-CH<sub>2</sub>-CH<sub>2</sub>-N(CH<sub>3</sub>)<sub>2</sub></p> <p>[*]C([*])[C@H](O)[c]1 :[cH]:[cH]:[*]:[c]([*]):[cH]:1</p> | 0.421 | 1 out of 1                 |

|                                        |            |                                                                                                                                                                |        |                            |
|----------------------------------------|------------|----------------------------------------------------------------------------------------------------------------------------------------------------------------|--------|----------------------------|
| ECFP_12                                | -177786161 | <p>AND Enantiomer</p> 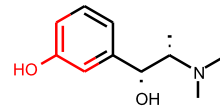 <p>[*]:[cH]:[c](O):[cH]:<br/>[*]</p>                 | 0.341  | 7 out of 15                |
| ECFP_12                                | 734603939  | <p>AND Enantiomer</p>  <p>[*]C</p>                                          | 0.0966 | 92 out of 267              |
| Top Features for negative contribution |            |                                                                                                                                                                |        |                            |
| Fingerprint                            | Bit/Smiles | Feature Structure                                                                                                                                              | Score  | Carcinogen in training set |
| ECFP_12                                | -388186450 | <p>AND Enantiomer</p>  <p>[*]C([*])[c]1:[cH]:[*]<br/>]:[cH]:[cH]:[cH]:1</p> | -1.68  | 0 out of 14                |
| ECFP_12                                | 1064495017 | <p>AND Enantiomer</p>  <p>[*]C([*])N(C)C</p>                              | -0.661 | 0 out of 3                 |
| ECFP_12                                | -783815036 | <p>AND Enantiomer</p>  <p>O[c]1:[cH]:[*]:[cH]:[<br/>cH]:[cH]:1</p>        | -0.661 | 0 out of 3                 |

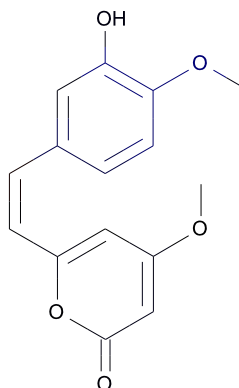C<sub>15</sub>H<sub>14</sub>O<sub>5</sub>

Molecular Weight: 274.269

ALogP: 1.969

Rotatable Bonds: 4

Acceptors: 5

Donors: 1

## Model Prediction

Prediction: Non-Carcinogen

Probability: 0.253

Enrichment: 0.787

Bayesian Score: -2.56

Mahalanobis Distance: 9.85

Mahalanobis Distance p-value: 0.44

Prediction: Positive if the Bayesian score is above the estimated best cutoff value from minimizing the false positive and false negative rate.

Probability: The estimated probability that the sample is in the positive category. This assumes that the Bayesian score follows a normal distribution and is different from the prediction using a cutoff.

Enrichment: An estimate of enrichment, that is, the increased likelihood (versus random) of this sample being in the category.

Bayesian Score: The standard Laplacian-modified Bayesian score.

Mahalanobis Distance: The Mahalanobis distance (MD) is the distance to the center of the training data. The larger the MD, the less trustworthy the prediction.

Mahalanobis Distance p-value: The p-value gives the fraction of training data with an MD greater than or equal to the one for the given sample, assuming normally distributed data. The smaller the p-value, the less trustworthy the prediction. For highly non-normal X properties (e.g., fingerprints), the MD p-value is wildly inaccurate.

## Structural Similar Compounds

| Name               | Cytembena                                                           | Scopolamine                                                         | Atropine                                                            |
|--------------------|---------------------------------------------------------------------|---------------------------------------------------------------------|---------------------------------------------------------------------|
| Structure          |                                                                     |                                                                     |                                                                     |
| Actual Endpoint    | Carcinogen                                                          | Non-Carcinogen                                                      | Non-Carcinogen                                                      |
| Predicted Endpoint | Carcinogen                                                          | Non-Carcinogen                                                      | Non-Carcinogen                                                      |
| Distance           | 0.554                                                               | 0.605                                                               | 0.610                                                               |
| Reference          | US FDA (Centre for Drug Eval.& Res./Off. Testing & Res.) Sept. 1997 | US FDA (Centre for Drug Eval.& Res./Off. Testing & Res.) Sept. 1997 | US FDA (Centre for Drug Eval.& Res./Off. Testing & Res.) Sept. 1997 |

## Model Applicability

Unknown features are fingerprint features in the query molecule, but not found or appearing too infrequently in the training set.

1. OPS PC13 out of range. Value: -3.1324. Training min, max, SD, explained variance: -2.9952, 6.2862, 1.429, 0.0214.
2. Unknown ECFP\_2 feature: -176483725: [\*]=C[c](:c[\*]):c:[\*]
3. Unknown ECFP\_2 feature: -1053980253: [\*]O\C(=C[\*])\C=[\*]
4. Unknown ECFP\_2 feature: -444332269: [\*]O\C(=C[\*])\C=[\*]

## Feature Contribution

| Top features for positive contribution |             |                   |       |                            |
|----------------------------------------|-------------|-------------------|-------|----------------------------|
| Fingerprint                            | Bit/Smiles  | Feature Structure | Score | Carcinogen in training set |
| ECFP_12                                | -1925046727 |                   | 0.407 | 16 out of 33               |
| [*]C=[*]                               |             |                   |       |                            |



| ECFP_12                                | 683445015  | 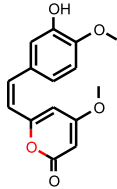<br><chem>[*]O[*]</chem>                              | 0.294  | 28 out of 66               |
|----------------------------------------|------------|------------------------------------------------------------------------------------------------------------------------------------------|--------|----------------------------|
| ECFP_12                                | 2106656448 | <br><chem>[*]C(=O)[*]</chem>                          | 0.141  | 30 out of 83               |
| Top Features for negative contribution |            |                                                                                                                                          |        |                            |
| Fingerprint                            | Bit/Smiles | Feature Structure                                                                                                                        | Score  | Carcinogen in training set |
| ECFP_12                                | 2077607946 | <br><chem>[*]O[c]1:[cH]:[cH]:[c]([*]):[c]:1[*]</chem> | -1.25  | 0 out of 8                 |
| ECFP_12                                | 1408898974 | <br><chem>[*]O[c](:[cH]:[*]):[c]([*]):[*]</chem>     | -0.517 | 5 out of 29                |
| ECFP_12                                | 1680623188 | <br><chem>[*][c](:[*]):[c](OC):[cH]:[*]</chem>      | -0.295 | 3 out of 14                |

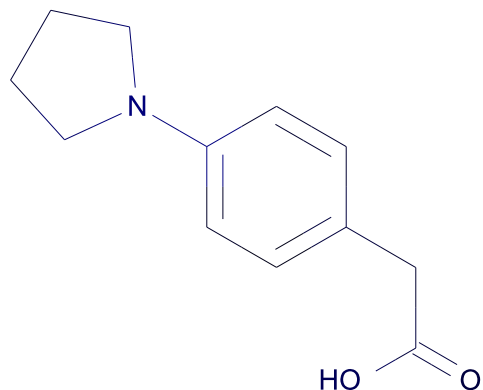

$C_{12}H_{15}NO_2$

Molecular Weight: 205.253

ALogP: 2.117

Rotatable Bonds: 3

Acceptors: 3

Donors: 1

## Model Prediction

Prediction: Non-Carcinogen

Probability: 0.233

Enrichment: 0.724

Bayesian Score: -4.01

Mahalanobis Distance: 9.87

Mahalanobis Distance p-value: 0.431

Prediction: Positive if the Bayesian score is above the estimated best cutoff value from minimizing the false positive and false negative rate.

Probability: The estimated probability that the sample is in the positive category. This assumes that the Bayesian score follows a normal distribution and is different from the prediction using a cutoff.

Enrichment: An estimate of enrichment, that is, the increased likelihood (versus random) of this sample being in the category.

Bayesian Score: The standard Laplacian-modified Bayesian score.

Mahalanobis Distance: The Mahalanobis distance (MD) is the distance to the center of the training data. The larger the MD, the less trustworthy the prediction.

Mahalanobis Distance p-value: The p-value gives the fraction of training data with an MD greater than or equal to the one for the given sample, assuming normally distributed data. The smaller the p-value, the less trustworthy the prediction. For highly non-normal X properties (e.g., fingerprints), the MD p-value is wildly inaccurate.

## Structural Similar Compounds

| Name               | Naproxen                                                            | Methylphenidate                                                     | Phenacetin                                                          |
|--------------------|---------------------------------------------------------------------|---------------------------------------------------------------------|---------------------------------------------------------------------|
| Structure          |                                                                     |                                                                     |                                                                     |
| Actual Endpoint    | Non-Carcinogen                                                      | Non-Carcinogen                                                      | Carcinogen                                                          |
| Predicted Endpoint | Non-Carcinogen                                                      | Non-Carcinogen                                                      | Carcinogen                                                          |
| Distance           | 0.536                                                               | 0.542                                                               | 0.579                                                               |
| Reference          | US FDA (Centre for Drug Eval.& Res./Off. Testing & Res.) Sept. 1997 | US FDA (Centre for Drug Eval.& Res./Off. Testing & Res.) Sept. 1997 | US FDA (Centre for Drug Eval.& Res./Off. Testing & Res.) Sept. 1997 |

## Model Applicability

Unknown features are fingerprint features in the query molecule, but not found or appearing too infrequently in the training set.

1. All properties and OPS components are within expected ranges.

## Feature Contribution

### Top features for positive contribution

| Fingerprint | Bit/Smiles | Feature Structure                                  | Score | Carcinogen in training set |
|-------------|------------|----------------------------------------------------|-------|----------------------------|
| ECFP_12     | 1737023319 | <p>[*]C(=*)C[c]:[cH]:<br/>[cH]:[*]:[cH]:[cH]:1</p> | 0.613 | 2 out of 2                 |

| ECFP_12                                | -175021654  | 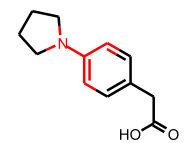<br><chem>[*]N([*])[c](:[cH]:[*]):[cH]:[*]</chem> | 0.158  | 2 out of 5                 |
|----------------------------------------|-------------|--------------------------------------------------------------------------------------------------------------------------------------|--------|----------------------------|
| ECFP_12                                | -1074141656 | <br><chem>[*]=O</chem>                            | 0.103  | 86 out of 248              |
| Top Features for negative contribution |             |                                                                                                                                      |        |                            |
| Fingerprint                            | Bit/Smiles  | Feature Structure                                                                                                                    | Score  | Carcinogen in training set |
| ECFP_12                                | 1251172932  | <br><chem>[*]:[c](:[*])CC(=O)O</chem>             | -0.661 | 0 out of 3                 |
| ECFP_12                                | 1731135544  | <br><chem>[*]CC(=O)O</chem>                      | -0.583 | 2 out of 14                |
| ECFP_12                                | 1951894094  | <br><chem>[*]:[c](:[*])N1C[*][*]C1</chem>       | -0.505 | 3 out of 18                |

AND Enantiomer

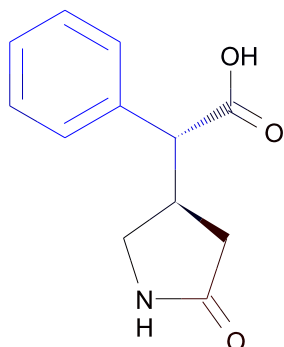C<sub>12</sub>H<sub>13</sub>NO<sub>3</sub>

Molecular Weight: 219.237

ALogP: 0.621

Rotatable Bonds: 3

Acceptors: 3

Donors: 2

## Model Prediction

Prediction: Non-Carcinogen

Probability: 0.214

Enrichment: 0.665

Bayesian Score: -5.65

Mahalanobis Distance: 9.58

Mahalanobis Distance p-value: 0.568

Prediction: Positive if the Bayesian score is above the estimated best cutoff value from minimizing the false positive and false negative rate.

Probability: The estimated probability that the sample is in the positive category. This assumes that the Bayesian score follows a normal distribution and is different from the prediction using a cutoff.

Enrichment: An estimate of enrichment, that is, the increased likelihood (versus random) of this sample being in the category.

Bayesian Score: The standard Laplacian-modified Bayesian score.

Mahalanobis Distance: The Mahalanobis distance (MD) is the distance to the center of the training data. The larger the MD, the less trustworthy the prediction.

Mahalanobis Distance p-value: The p-value gives the fraction of training data with an MD greater than or equal to the one for the given sample, assuming normally distributed data. The smaller the p-value, the less trustworthy the prediction. For highly non-normal X properties (e.g., fingerprints), the MD p-value is wildly inaccurate.

## Structural Similar Compounds

| Name               | Phenobarbital                                                       | Aminoglutethimide                                                   | Baclofen                                                            |
|--------------------|---------------------------------------------------------------------|---------------------------------------------------------------------|---------------------------------------------------------------------|
| Structure          |                                                                     |                                                                     |                                                                     |
| Actual Endpoint    | Carcinogen                                                          | Carcinogen                                                          | Non-Carcinogen                                                      |
| Predicted Endpoint | Carcinogen                                                          | Carcinogen                                                          | Non-Carcinogen                                                      |
| Distance           | 0.526                                                               | 0.544                                                               | 0.601                                                               |
| Reference          | US FDA (Centre for Drug Eval.& Res./Off. Testing & Res.) Sept. 1997 | US FDA (Centre for Drug Eval.& Res./Off. Testing & Res.) Sept. 1997 | US FDA (Centre for Drug Eval.& Res./Off. Testing & Res.) Sept. 1997 |

## Model Applicability

Unknown features are fingerprint features in the query molecule, but not found or appearing too infrequently in the training set.

1. All properties and OPS components are within expected ranges.
2. Unknown ECFP\_2 feature: -858846751: [\*]C([\*])C1C[\*][\*]C1

## Feature Contribution

### Top features for positive contribution

| Fingerprint | Bit/Smiles | Feature Structure                               | Score | Carcinogen in training set |
|-------------|------------|-------------------------------------------------|-------|----------------------------|
| ECFP_12     | 53207596   | <p>AND Enantiomer</p> <p>[*]C([*])CC(=O)[*]</p> | 0.459 | 8 out of 15                |

| ECFP_12                                | -742538367  | <p>AND Enantiomer</p> 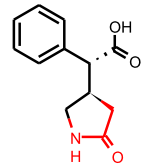 <p><chem>O=C1C([*])([*])N1</chem></p>                         | 0.445 | 3 out of 5                 |
|----------------------------------------|-------------|-------------------------------------------------------------------------------------------------------------------------------------------------------------------------|-------|----------------------------|
| ECFP_12                                | -1905455774 | <p>AND Enantiomer</p>  <p><chem>[*]C([*])C(=O)O</chem></p>                           | 0.357 | 4 out of 8                 |
| Top Features for negative contribution |             |                                                                                                                                                                         |       |                            |
| Fingerprint                            | Bit/Smiles  | Feature Structure                                                                                                                                                       | Score | Carcinogen in training set |
| ECFP_12                                | -388186450  | <p>AND Enantiomer</p>  <p><chem>[*]C([*])[c]1:[cH]:[*]:[cH]:[cH]:[cH]:1</chem></p>   | -1.68 | 0 out of 14                |
| ECFP_12                                | 2014710090  | <p>AND Enantiomer</p>  <p><chem>[*]C([*])[c]1:[cH]:[cH]:[cH]:[cH]:[cH]:1</chem></p> | -1.56 | 0 out of 12                |
| ECFP_12                                | 1571214559  | <p>AND Enantiomer</p>  <p><chem>[*]1:[cH]:[cH]:[cH]:[cH]:[cH]:1</chem></p>         | -0.56 | 11 out of 64               |

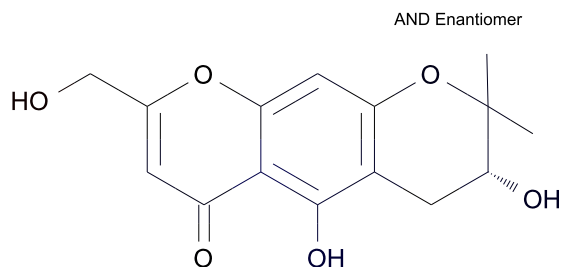

$C_{15}H_{16}O_6$

Molecular Weight: 292.284

ALogP: 0.901

Rotatable Bonds: 1

Acceptors: 6

Donors: 3

## Model Prediction

Prediction: Non-Carcinogen

Probability: 0.259

Enrichment: 0.803

Bayesian Score: -2.22

Mahalanobis Distance: 10.6

Mahalanobis Distance p-value: 0.162

Prediction: Positive if the Bayesian score is above the estimated best cutoff value from minimizing the false positive and false negative rate.

Probability: The estimated probability that the sample is in the positive category. This assumes that the Bayesian score follows a normal distribution and is different from the prediction using a cutoff.

Enrichment: An estimate of enrichment, that is, the increased likelihood (versus random) of this sample being in the category.

Bayesian Score: The standard Laplacian-modified Bayesian score.

Mahalanobis Distance: The Mahalanobis distance (MD) is the distance to the center of the training data. The larger the MD, the less trustworthy the prediction.

Mahalanobis Distance p-value: The p-value gives the fraction of training data with an MD greater than or equal to the one for the given sample, assuming normally distributed data. The smaller the p-value, the less trustworthy the prediction. For highly non-normal X properties (e.g., fingerprints), the MD p-value is wildly inaccurate.

## Structural Similar Compounds

| Name               | Prednisolone                                                        | Hydrocortisone                                                      | Piroxicam                                                           |
|--------------------|---------------------------------------------------------------------|---------------------------------------------------------------------|---------------------------------------------------------------------|
| Structure          |                                                                     |                                                                     |                                                                     |
| Actual Endpoint    | Non-Carcinogen                                                      | Non-Carcinogen                                                      | Non-Carcinogen                                                      |
| Predicted Endpoint | Carcinogen                                                          | Non-Carcinogen                                                      | Non-Carcinogen                                                      |
| Distance           | 0.645                                                               | 0.651                                                               | 0.674                                                               |
| Reference          | US FDA (Centre for Drug Eval.& Res./Off. Testing & Res.) Sept. 1997 | US FDA (Centre for Drug Eval.& Res./Off. Testing & Res.) Sept. 1997 | US FDA (Centre for Drug Eval.& Res./Off. Testing & Res.) Sept. 1997 |

## Model Applicability

Unknown features are fingerprint features in the query molecule, but not found or appearing too infrequently in the training set.

1. All properties and OPS components are within expected ranges.

## Feature Contribution

### Top features for positive contribution

| Fingerprint | Bit/Smiles | Feature Structure                     | Score | Carcinogen in training set |
|-------------|------------|---------------------------------------|-------|----------------------------|
| ECFP_12     | 53207596   | <br><chem>[*]C([*])CC(=[*])[*]</chem> | 0.459 | 8 out of 15                |

| ECFP_12                                | -200406221  | 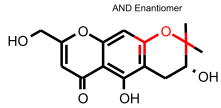 <p>AND Enantiomer</p> <chem>[*]C([*])([*])O[c](:[*])</chem>         | 0.33   | 3 out of 6                 |
|----------------------------------------|-------------|---------------------------------------------------------------------------------------------------------------------------------------------------------|--------|----------------------------|
| ECFP_12                                | 683445015   |  <p>AND Enantiomer</p> <chem>[*]O[*]</chem>                          | 0.294  | 28 out of 66               |
| Top Features for negative contribution |             |                                                                                                                                                         |        |                            |
| Fingerprint                            | Bit/Smiles  | Feature Structure                                                                                                                                       | Score  | Carcinogen in training set |
| ECFP_12                                | -1660913849 |  <p>AND Enantiomer</p> <chem>[*][c](:[*]):[c](O):[c]([*]):[*]</chem> | -0.941 | 0 out of 5                 |
| ECFP_12                                | -1051556861 |  <p>AND Enantiomer</p> <chem>[*]C[C@@H](O)C([*])([*])</chem>       | -0.661 | 0 out of 3                 |
| ECFP_12                                | 1875238785  |  <p>AND Enantiomer</p> <chem>[*]C\C(=C\[*])O[*]</chem>             | -0.272 | 0 out of 1                 |

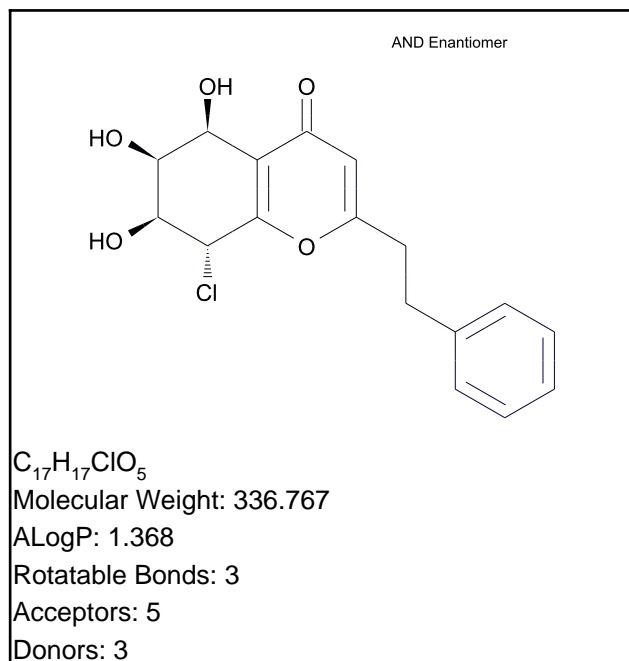

## Model Prediction

Prediction: Non-Carcinogen

Probability: 0.253

Enrichment: 0.787

Bayesian Score: -2.55

Mahalanobis Distance: 11.8

Mahalanobis Distance p-value: 0.00903

Prediction: Positive if the Bayesian score is above the estimated best cutoff value from minimizing the false positive and false negative rate.

Probability: The estimated probability that the sample is in the positive category. This assumes that the Bayesian score follows a normal distribution and is different from the prediction using a cutoff.

Enrichment: An estimate of enrichment, that is, the increased likelihood (versus random) of this sample being in the category.

Bayesian Score: The standard Laplacian-modified Bayesian score.

Mahalanobis Distance: The Mahalanobis distance (MD) is the distance to the center of the training data. The larger the MD, the less trustworthy the prediction.

Mahalanobis Distance p-value: The p-value gives the fraction of training data with an MD greater than or equal to the one for the given sample, assuming normally distributed data. The smaller the p-value, the less trustworthy the prediction. For highly non-normal X properties (e.g., fingerprints), the MD p-value is wildly inaccurate.

## Structural Similar Compounds

| Name               | Prednisolone                                                                        | Hydrocortisone                                                                      | Beclomethasone                                                                      |
|--------------------|-------------------------------------------------------------------------------------|-------------------------------------------------------------------------------------|-------------------------------------------------------------------------------------|
| Structure          | 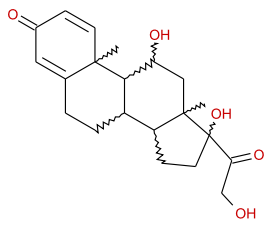 |  |  |
| Actual Endpoint    | Non-Carcinogen                                                                      | Non-Carcinogen                                                                      | Non-Carcinogen                                                                      |
| Predicted Endpoint | Carcinogen                                                                          | Non-Carcinogen                                                                      | Non-Carcinogen                                                                      |
| Distance           | 0.551                                                                               | 0.555                                                                               | 0.633                                                                               |
| Reference          | US FDA (Centre for Drug Eval.& Res./Off. Testing & Res.) Sept. 1997                 | US FDA (Centre for Drug Eval.& Res./Off. Testing & Res.) Sept. 1997                 | US FDA (Centre for Drug Eval.& Res./Off. Testing & Res.) Sept. 1997                 |

## Model Applicability

Unknown features are fingerprint features in the query molecule, but not found or appearing too infrequently in the training set.

1. All properties and OPS components are within expected ranges.
2. Unknown ECFP\_2 feature: -1567907747: [\*]C([\*])[C@@H](O)C(=[\*])[\*]
3. Unknown ECFP\_2 feature: -7106223: [\*]C([\*])[C@@H](Cl)C(=[\*])[\*]
4. Unknown ECFP\_2 feature: 1652274794: [\*]OC(=C([\*])[\*])C([\*])[\*]

## Feature Contribution

### Top features for positive contribution

| Fingerprint | Bit/Smiles | Feature Structure                                                                                                 | Score | Carcinogen in training set |
|-------------|------------|-------------------------------------------------------------------------------------------------------------------|-------|----------------------------|
| ECFP_12     | 105634199  | 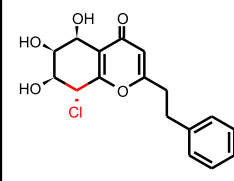<br><chem>[*]C([*])Cl</chem> | 0.421 | 1 out of 1                 |



|                                        |             |                                                                                                                                                      |        |                            |
|----------------------------------------|-------------|------------------------------------------------------------------------------------------------------------------------------------------------------|--------|----------------------------|
| ECFP_12                                | 683445015   | <p>AND Enantiomer</p> 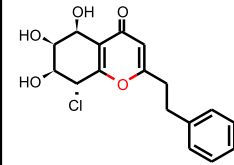 <p>[*]O[*]</p>                             | 0.294  | 28 out of 66               |
| ECFP_12                                | -1650219925 | <p>AND Enantiomer</p>  <p>[*]C[c]1:[cH]:[cH]:[cH]:[cH]:[cH]:1</p> | 0.208  | 6 out of 15                |
| Top Features for negative contribution |             |                                                                                                                                                      |        |                            |
| Fingerprint                            | Bit/Smiles  | Feature Structure                                                                                                                                    | Score  | Carcinogen in training set |
| ECFP_12                                | 1571214559  | <p>AND Enantiomer</p>  <p>[*]1:[cH]:[cH]:[cH]:[cH]:[cH]:1</p>     | -0.56  | 11 out of 64               |
| ECFP_12                                | -281505363  | <p>AND Enantiomer</p>  <p>[*][c]1:[cH]:[cH]:[cH]:[cH]:[cH]:1</p> | -0.56  | 11 out of 64               |
| ECFP_12                                | -817402818  | <p>AND Enantiomer</p>  <p>[*]Cl</p>                             | -0.368 | 17 out of 80               |

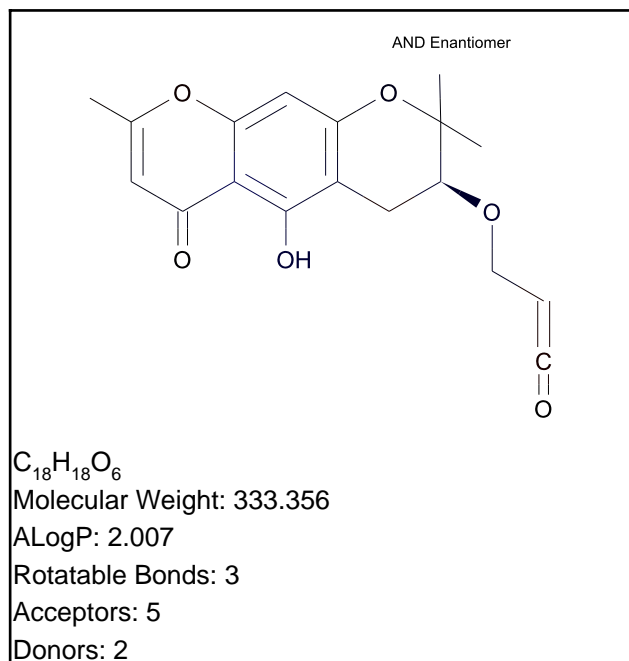

## Model Prediction

Prediction: **Carcinogen**

Probability: 0.27

Enrichment: 0.837

Bayesian Score: -1.55

Mahalanobis Distance: 14

Mahalanobis Distance p-value: 2.45e-006

Prediction: Positive if the Bayesian score is above the estimated best cutoff value from minimizing the false positive and false negative rate.

Probability: The estimated probability that the sample is in the positive category. This assumes that the Bayesian score follows a normal distribution and is different from the prediction using a cutoff.

Enrichment: An estimate of enrichment, that is, the increased likelihood (versus random) of this sample being in the category. Bayesian Score: The standard Laplacian-modified Bayesian score.

Mahalanobis Distance: The Mahalanobis distance (MD) is the distance to the center of the training data. The larger the MD, the less trustworthy the prediction.

Mahalanobis Distance p-value: The p-value gives the fraction of training data with an MD greater than or equal to the one for the given sample, assuming normally distributed data. The smaller the p-value, the less trustworthy the prediction. For highly non-normal X properties (e.g., fingerprints), the MD p-value is wildly inaccurate.

## Structural Similar Compounds

| Name               | Naltrexone                                                                          | Tolazamide                                                                          | Doxefazepam                                                                         |
|--------------------|-------------------------------------------------------------------------------------|-------------------------------------------------------------------------------------|-------------------------------------------------------------------------------------|
| Structure          | 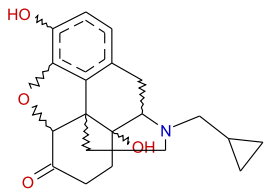 |  |  |
| Actual Endpoint    | Non-Carcinogen                                                                      | Non-Carcinogen                                                                      | Carcinogen                                                                          |
| Predicted Endpoint | Non-Carcinogen                                                                      | Non-Carcinogen                                                                      | Carcinogen                                                                          |
| Distance           | 0.551                                                                               | 0.580                                                                               | 0.603                                                                               |
| Reference          | US FDA (Centre for Drug Eval.& Res./Off. Testing & Res.) Sept. 1997                 | US FDA (Centre for Drug Eval.& Res./Off. Testing & Res.) Sept. 1997                 | US FDA (Centre for Drug Eval.& Res./Off. Testing & Res.) Sept. 1997                 |

## Model Applicability

Unknown features are fingerprint features in the query molecule, but not found or appearing too infrequently in the training set.

1. All properties and OPS components are within expected ranges.
2. Unknown ECFP\_2 feature: -331149802: [\*]O\C(=C/[\*])\C
3. Unknown ECFP\_2 feature: -1591590376: [\*]C=C=O
4. Unknown ECFP\_2 feature: 2106995136: [\*]=C=O
5. Unknown ECFP\_2 feature: -91536905: [\*]CC=C=O
6. Unknown ECFP\_2 feature: -1688150664: [\*]OCC=O

## Feature Contribution

### Top features for positive contribution

| Fingerprint | Bit/Smiles | Feature Structure | Score | Carcinogen in training set |
|-------------|------------|-------------------|-------|----------------------------|
|             |            |                   |       |                            |

| ECFP_12                                | -1114776580 | <p>AND Enantiomer</p> 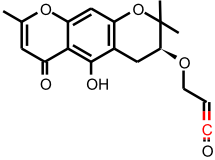 <p>[*]=C=[*]</p>                         | 0.461  | 10 out of 19               |
|----------------------------------------|-------------|----------------------------------------------------------------------------------------------------------------------------------------------------|--------|----------------------------|
| ECFP_12                                | 53207596    | <p>AND Enantiomer</p>  <p>[*]C([*])CC(=[*])[*]</p>              | 0.459  | 8 out of 15                |
| ECFP_12                                | -1925046727 | <p>AND Enantiomer</p>  <p>[*]C=[*]</p>                          | 0.407  | 16 out of 33               |
| Top Features for negative contribution |             |                                                                                                                                                    |        |                            |
| Fingerprint                            | Bit/Smiles  | Feature Structure                                                                                                                                  | Score  | Carcinogen in training set |
| ECFP_12                                | -1660913849 | <p>AND Enantiomer</p>  <p>[*][c](:[*]):[c](O):[c]([*]):[*]</p> | -0.941 | 0 out of 5                 |
| ECFP_12                                | -1250019913 | <p>AND Enantiomer</p>  <p>[*]COC([*])[*]</p>                  | -0.485 | 0 out of 2                 |

ECFP\_12

-2124995946

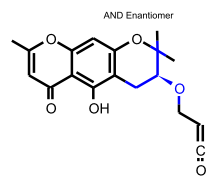

-0.272

0 out of 1

[\*]C[C@H](O[\*])C([\*])  
([\*])[\*]

AND Enantiomer

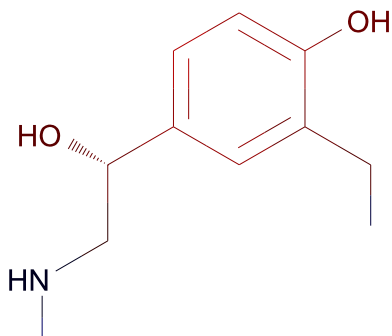C<sub>11</sub>H<sub>17</sub>NO<sub>2</sub>

Molecular Weight: 195.258

ALogP: 1.557

Rotatable Bonds: 4

Acceptors: 3

Donors: 3

## Model Prediction

Prediction: Carcinogen

Probability: 0.272

Enrichment: 0.845

Bayesian Score: -1.41

Mahalanobis Distance: 9.23

Mahalanobis Distance p-value: 0.729

Prediction: Positive if the Bayesian score is above the estimated best cutoff value from minimizing the false positive and false negative rate.

Probability: The estimated probability that the sample is in the positive category. This assumes that the Bayesian score follows a normal distribution and is different from the prediction using a cutoff.

Enrichment: An estimate of enrichment, that is, the increased likelihood (versus random) of this sample being in the category.

Bayesian Score: The standard Laplacian-modified Bayesian score.

Mahalanobis Distance: The Mahalanobis distance (MD) is the distance to the center of the training data. The larger the MD, the less trustworthy the prediction.

Mahalanobis Distance p-value: The p-value gives the fraction of training data with an MD greater than or equal to the one for the given sample, assuming normally distributed data. The smaller the p-value, the less trustworthy the prediction. For highly non-normal X properties (e.g., fingerprints), the MD p-value is wildly inaccurate.

## Structural Similar Compounds

| Name               | Phenylephrine                                                       | Albuterol                                                           | Procarrbazine                                                       |
|--------------------|---------------------------------------------------------------------|---------------------------------------------------------------------|---------------------------------------------------------------------|
| Structure          |                                                                     |                                                                     |                                                                     |
| Actual Endpoint    | Non-Carcinogen                                                      | Carcinogen                                                          | Carcinogen                                                          |
| Predicted Endpoint | Non-Carcinogen                                                      | Carcinogen                                                          | Carcinogen                                                          |
| Distance           | 0.433                                                               | 0.502                                                               | 0.565                                                               |
| Reference          | US FDA (Centre for Drug Eval.& Res./Off. Testing & Res.) Sept. 1997 | US FDA (Centre for Drug Eval.& Res./Off. Testing & Res.) Sept. 1997 | US FDA (Centre for Drug Eval.& Res./Off. Testing & Res.) Sept. 1997 |

## Model Applicability

Unknown features are fingerprint features in the query molecule, but not found or appearing too infrequently in the training set.

1. All properties and OPS components are within expected ranges.

## Feature Contribution

### Top features for positive contribution

| Fingerprint | Bit/Smiles  | Feature Structure                                                                | Score | Carcinogen in training set |
|-------------|-------------|----------------------------------------------------------------------------------|-------|----------------------------|
| ECFP_12     | -1411846807 | <p>AND Enantiomer</p> <p>[*]C[c]1:[cH]:[c](:[cH]:[cH]:[c]:1[*])[C@H](O)CN[*]</p> | 0.613 | 2 out of 2                 |

| ECFP_12                                | -283284905 | <p>AND Enantiomer</p> 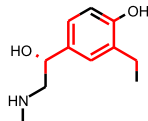 <p>[*]C[c]1:[cH]:[c](:[cH]:[*]:[c]:1[*])C([*])</p> | 0.613  | 2 out of 2                 |
|----------------------------------------|------------|--------------------------------------------------------------------------------------------------------------------------------------------------------------|--------|----------------------------|
| ECFP_12                                | -188314265 | <p>AND Enantiomer</p>  <p>[*]C[c]1:[cH]:[c](:[cH]:[*]:[c]:1O)C([*])</p>   | 0.613  | 2 out of 2                 |
| Top Features for negative contribution |            |                                                                                                                                                              |        |                            |
| Fingerprint                            | Bit/Smiles | Feature Structure                                                                                                                                            | Score  | Carcinogen in training set |
| ECFP_12                                | 767488533  | <p>AND Enantiomer</p>  <p>[*]:[c](:[*])CC</p>                             | -0.941 | 0 out of 5                 |
| ECFP_12                                | 493154328  | <p>AND Enantiomer</p>  <p>[*]CNC</p>                                    | -0.661 | 0 out of 3                 |
| ECFP_12                                | -176846085 | <p>AND Enantiomer</p>  <p>[*]C([*])[c](:[cH]:[*]):[cH]:[*]</p>          | -0.374 | 7 out of 34                |

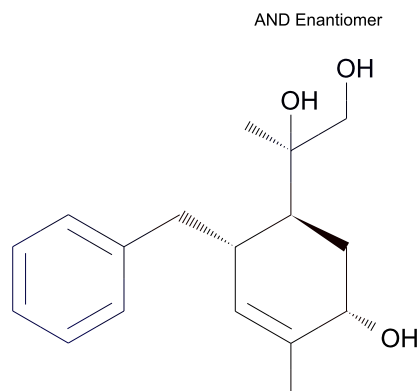

$C_{17}H_{24}O_3$

Molecular Weight: 276.371

ALogP: 2.165

Rotatable Bonds: 4

Acceptors: 3

Donors: 3

## Model Prediction

Prediction: Non-Carcinogen

Probability: 0.252

Enrichment: 0.781

Bayesian Score: -2.67

Mahalanobis Distance: 11.7

Mahalanobis Distance p-value: 0.0121

Prediction: Positive if the Bayesian score is above the estimated best cutoff value from minimizing the false positive and false negative rate.

Probability: The estimated probability that the sample is in the positive category. This assumes that the Bayesian score follows a normal distribution and is different from the prediction using a cutoff.

Enrichment: An estimate of enrichment, that is, the increased likelihood (versus random) of this sample being in the category. Bayesian Score: The standard Laplacian-modified Bayesian score.

Mahalanobis Distance: The Mahalanobis distance (MD) is the distance to the center of the training data. The larger the MD, the less trustworthy the prediction.

Mahalanobis Distance p-value: The p-value gives the fraction of training data with an MD greater than or equal to the one for the given sample, assuming normally distributed data. The smaller the p-value, the less trustworthy the prediction. For highly non-normal X properties (e.g., fingerprints), the MD p-value is wildly inaccurate.

## Structural Similar Compounds

| Name               | Pindolol                                                            | Carteolol                                                           | Procarbazine                                                        |
|--------------------|---------------------------------------------------------------------|---------------------------------------------------------------------|---------------------------------------------------------------------|
| Structure          |                                                                     |                                                                     |                                                                     |
| Actual Endpoint    | Non-Carcinogen                                                      | Non-Carcinogen                                                      | Carcinogen                                                          |
| Predicted Endpoint | Non-Carcinogen                                                      | Non-Carcinogen                                                      | Carcinogen                                                          |
| Distance           | 0.604                                                               | 0.635                                                               | 0.647                                                               |
| Reference          | US FDA (Centre for Drug Eval.& Res./Off. Testing & Res.) Sept. 1997 | US FDA (Centre for Drug Eval.& Res./Off. Testing & Res.) Sept. 1997 | US FDA (Centre for Drug Eval.& Res./Off. Testing & Res.) Sept. 1997 |

## Model Applicability

Unknown features are fingerprint features in the query molecule, but not found or appearing too infrequently in the training set.

- OPS PC20 out of range. Value: -3.2486. Training min, max, SD, explained variance: -3.0915, 4.6636, 1.259, 0.0166.
- Unknown ECFP\_2 feature: -2097867909: [\*]C[C@H](O)C(=[\*])[\*]
- Unknown ECFP\_2 feature: -327548242: [\*]C[C@@H](C([\*])[\*])C([\*])([\*])[\*]
- Unknown ECFP\_2 feature: -1263967621: [\*]C[C@@H](C(=[\*])C([\*])[\*])
- Unknown ECFP\_2 feature: -1042330089: [\*]C=C(\C)/C([\*])[\*]
- Unknown ECFP\_2 feature: 1280892564: [\*]C[C@](C)(O)C([\*])[\*]
- Unknown ECFP\_2 feature: 771121623: [\*]C([\*])C[c](:[\*]):[\*]

## Feature Contribution

### Top features for positive contribution

| Fingerprint | Bit/Smiles | Feature Structure | Score | Carcinogen in training set |
|-------------|------------|-------------------|-------|----------------------------|
|-------------|------------|-------------------|-------|----------------------------|

|                                        |                   |                                                                                                                                                       |              |                                   |
|----------------------------------------|-------------------|-------------------------------------------------------------------------------------------------------------------------------------------------------|--------------|-----------------------------------|
| ECFP_12                                | -801490360        | <p>AND Enantiomer</p> 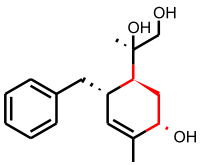 <p>[*]C([*])CC([*])[*]</p>                  | 0.339        | 14 out of 31                      |
| ECFP_12                                | -1650219925       | <p>AND Enantiomer</p>  <p>[*]C[c]1:[cH]:[cH]:[cH]:[cH]:[cH]:1</p>  | 0.208        | 6 out of 15                       |
| ECFP_12                                | 1095683433        | <p>AND Enantiomer</p>  <p>[*]C[c]1:[cH]:[*]:[cH]:[cH]:[cH]:1</p>   | 0.154        | 6 out of 16                       |
| Top Features for negative contribution |                   |                                                                                                                                                       |              |                                   |
| <b>Fingerprint</b>                     | <b>Bit/Smiles</b> | <b>Feature Structure</b>                                                                                                                              | <b>Score</b> | <b>Carcinogen in training set</b> |
| ECFP_12                                | 1571214559        | <p>AND Enantiomer</p>  <p>[*]1:[cH]:[cH]:[cH]:[cH]:[cH]:1</p>    | -0.56        | 11 out of 64                      |
| ECFP_12                                | -281505363        | <p>AND Enantiomer</p>  <p>[*][c]1:[cH]:[cH]:[cH]:[cH]:[cH]:1</p> | -0.56        | 11 out of 64                      |



|         |            |                                                                                                                                               |        |               |
|---------|------------|-----------------------------------------------------------------------------------------------------------------------------------------------|--------|---------------|
| ECFP_12 | 1997021792 | <p>AND Enantiomer</p> 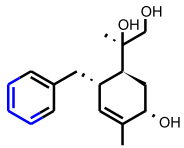 <p>[*].[cH]:[cH]:[cH]:[*]<br/>]</p> | -0.296 | 36 out of 156 |
|---------|------------|-----------------------------------------------------------------------------------------------------------------------------------------------|--------|---------------|

# Simeprevir

# TOPKAT\_Rat\_Female\_FDA\_None\_vs\_Carcinogen

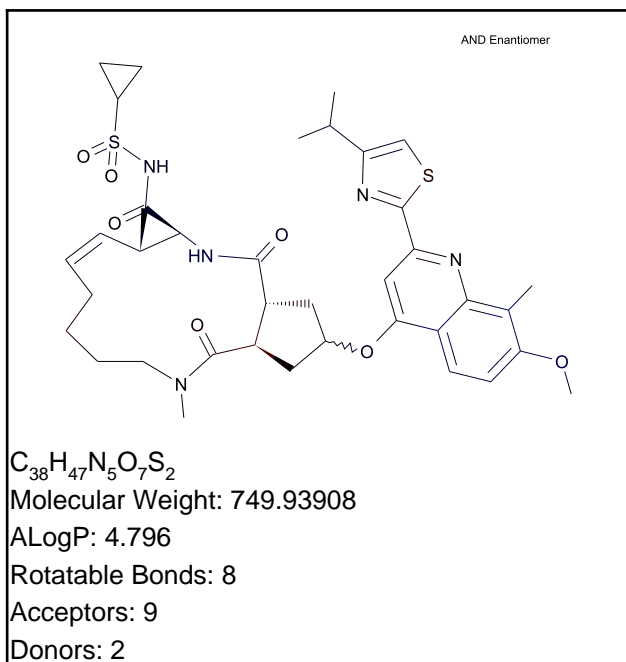

## Model Prediction

Prediction: Non-Carcinogen

Probability: 0.232

Enrichment: 0.719

Bayesian Score: -4.13

Mahalanobis Distance: 14.6

Mahalanobis Distance p-value: 1.61e-007

Prediction: Positive if the Bayesian score is above the estimated best cutoff value from minimizing the false positive and false negative rate.

Probability: The estimated probability that the sample is in the positive category. This assumes that the Bayesian score follows a normal distribution and is different from the prediction using a cutoff.

Enrichment: An estimate of enrichment, that is, the increased likelihood (versus random) of this sample being in the category.

Bayesian Score: The standard Laplacian-modified Bayesian score.

Mahalanobis Distance: The Mahalanobis distance (MD) is the distance to the center of the training data. The larger the MD, the less trustworthy the prediction.

Mahalanobis Distance p-value: The p-value gives the fraction of training data with an MD greater than or equal to the one for the given sample, assuming normally distributed data. The smaller the p-value, the less trustworthy the prediction. For highly non-normal X properties (e.g., fingerprints), the MD p-value is wildly inaccurate.

## Structural Similar Compounds

| Name               | Reserpine                                                                           | Deserpidine                                                                         | Bromocriptine                                                                       |
|--------------------|-------------------------------------------------------------------------------------|-------------------------------------------------------------------------------------|-------------------------------------------------------------------------------------|
| Structure          | 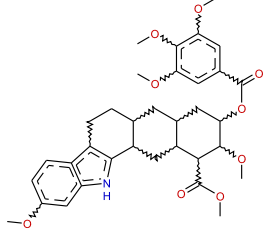 |  |  |
| Actual Endpoint    | Carcinogen                                                                          | Carcinogen                                                                          | Carcinogen                                                                          |
| Predicted Endpoint | Carcinogen                                                                          | Carcinogen                                                                          | Carcinogen                                                                          |
| Distance           | 0.807                                                                               | 0.846                                                                               | 0.874                                                                               |
| Reference          | US FDA (Centre for Drug Eval.& Res./Off. Testing & Res.) Sept. 1997                 | US FDA (Centre for Drug Eval.& Res./Off. Testing & Res.) Sept. 1997                 | US FDA (Centre for Drug Eval.& Res./Off. Testing & Res.) Sept. 1997                 |

## Model Applicability

Unknown features are fingerprint features in the query molecule, but not found or appearing too infrequently in the training set.

1. All properties and OPS components are within expected ranges.
2. Unknown ECFP\_2 feature: -309676563: [\*]N[C@]1(C[C@H]1[\*])C(=[\*])[\*]
3. Unknown ECFP\_2 feature: -1049290660: [\*]C1([\*])C[C@H]1C=[\*]
4. Unknown ECFP\_2 feature: 1616402542: [\*]CN(C)C(=[\*])[\*]
5. Unknown ECFP\_2 feature: -1818486371: [\*]NC(=O)C1([\*])[\*][\*]1
6. Unknown ECFP\_2 feature: 1310940530: [\*]C([\*])O[c](:[\*]):[\*]
7. Unknown ECFP\_2 feature: 733491677: [\*]:c(:[\*])C(C)C
8. Unknown ECFP\_2 feature: 2121941848: [\*]NS(=O)(=O)C1[\*][\*]1
9. Unknown ECFP\_2 feature: -622223421: [\*]S(=[\*])(=[\*])C1CC1

## Feature Contribution

### Top features for positive contribution

| Fingerprint | Bit/Smiles | Feature Structure | Score | Carcinogen in training set |
|-------------|------------|-------------------|-------|----------------------------|
|-------------|------------|-------------------|-------|----------------------------|

|                                        |             |                                                                                                                                                                  |        |                            |
|----------------------------------------|-------------|------------------------------------------------------------------------------------------------------------------------------------------------------------------|--------|----------------------------|
| ECFP_12                                | -1331088410 | <p>AND Enantiomer</p> 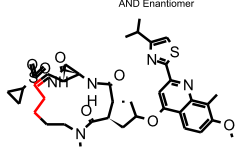 <p>[*]CCC=[*]</p>                                      | 0.725  | 3 out of 3                 |
| ECFP_12                                | -2095963820 | <p>AND Enantiomer</p>  <p>[*][C@@H]1[*][*]C[C@H]<br/>1C(=[*])[*]</p>          | 0.722  | 12 out of 17               |
| ECFP_12                                | 914325265   | <p>AND Enantiomer</p>  <p>[*]:s:[*]</p>                                       | 0.516  | 8 out of 14                |
| Top Features for negative contribution |             |                                                                                                                                                                  |        |                            |
| Fingerprint                            | Bit/Smiles  | Feature Structure                                                                                                                                                | Score  | Carcinogen in training set |
| ECFP_12                                | 2077607946  | <p>AND Enantiomer</p>  <p>[*]O[c]1:[cH]:[cH]:[c]<br/>1([*]):[*]:[c]:1[*]</p> | -1.25  | 0 out of 8                 |
| ECFP_12                                | -867777309  | <p>AND Enantiomer</p>  <p>[*]NC(=O)C([*])[*]</p>                            | -0.661 | 0 out of 3                 |

ECFP\_12

1408898974

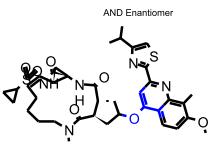

-0.517

5 out of 29

[\*]O[c](:[cH]:[\*]):[c]  
]([\*]):[\*]

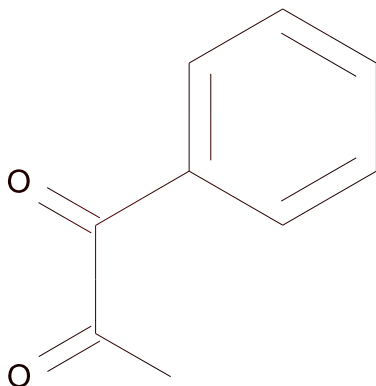C<sub>9</sub>H<sub>8</sub>O<sub>2</sub>

Molecular Weight: 148.159

ALogP: 1.446

Rotatable Bonds: 2

Acceptors: 2

Donors: 0

## Model Prediction

Prediction: Multiple-Carcinogen

Probability: 0.556

Enrichment: 1.49

Bayesian Score: 2.28

Mahalanobis Distance: 12.3

Mahalanobis Distance p-value: 0.000946

Prediction: Positive if the Bayesian score is above the estimated best cutoff value from minimizing the false positive and false negative rate.

Probability: The estimated probability that the sample is in the positive category. This assumes that the Bayesian score follows a normal distribution and is different from the prediction using a cutoff.

Enrichment: An estimate of enrichment, that is, the increased likelihood (versus random) of this sample being in the category.

Bayesian Score: The standard Laplacian-modified Bayesian score.

Mahalanobis Distance: The Mahalanobis distance (MD) is the distance to the center of the training data. The larger the MD, the less trustworthy the prediction.

Mahalanobis Distance p-value: The p-value gives the fraction of training data with an MD greater than or equal to the one for the given sample, assuming normally distributed data. The smaller the p-value, the less trustworthy the prediction. For highly non-normal X properties (e.g., fingerprints), the MD p-value is wildly inaccurate.

## Structural Similar Compounds

| Name               | Phenacetin                                                          | Methoxsalen; 8-                                                     | Nicotine                                                            |
|--------------------|---------------------------------------------------------------------|---------------------------------------------------------------------|---------------------------------------------------------------------|
| Structure          |                                                                     |                                                                     |                                                                     |
| Actual Endpoint    | Multiple-Carcinogen                                                 | Single-Carcinogen                                                   | Single-Carcinogen                                                   |
| Predicted Endpoint | Multiple-Carcinogen                                                 | Single-Carcinogen                                                   | Single-Carcinogen                                                   |
| Distance           | 0.589                                                               | 0.596                                                               | 0.621                                                               |
| Reference          | US FDA (Centre for Drug Eval.& Res./Off. Testing & Res.) Sept. 1997 | US FDA (Centre for Drug Eval.& Res./Off. Testing & Res.) Sept. 1997 | US FDA (Centre for Drug Eval.& Res./Off. Testing & Res.) Sept. 1997 |

## Model Applicability

Unknown features are fingerprint features in the query molecule, but not found or appearing too infrequently in the training set.

1. All properties and OPS components are within expected ranges.

## Feature Contribution

### Top features for positive contribution

| Fingerprint | Bit/Smiles | Feature Structure                                       | Score | Multiple-Carcinogen in training set |
|-------------|------------|---------------------------------------------------------|-------|-------------------------------------|
| SCFP_4      | 387787917  | <br><chem>[*]C(=O)[c]1:[cH]:[*]:[cH]:[cH]:[cH]:1</chem> | 0.449 | 6 out of 11                         |

|                                        |             |                                                                                                                                                   |         |                                     |
|----------------------------------------|-------------|---------------------------------------------------------------------------------------------------------------------------------------------------|---------|-------------------------------------|
| SCFP_4                                 | -541146916  | 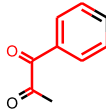<br><chem>[*]C(=[*])C(=O)[c]1:[cH]:[cH]:[*]:[cH]:[cH]:1</chem> | 0.419   | 1 out of 1                          |
| SCFP_4                                 | 571795252   | <br><chem>[*]C(=[*])C(=O)C</chem>                              | 0.283   | 2 out of 4                          |
| Top Features for negative contribution |             |                                                                                                                                                   |         |                                     |
| Fingerprint                            | Bit/Smiles  | Feature Structure                                                                                                                                 | Score   | Multiple-Carcinogen in training set |
| SCFP_4                                 | -1379591900 | <br><chem>[*][c]1:[*]:[cH]:[cH]:[cH]:[cH]:1</chem>             | -0.0895 | 10 out of 35                        |
| SCFP_4                                 | -2056718782 | <br><chem>[*]C(=[*])[c](:[cH]:[*]):[cH]:[*]</chem>           | 0       | 6 out of 19                         |
| SCFP_4                                 | 136627117   | <br><chem>[*]C(=[*])C</chem>                                 | 0       | 6 out of 18                         |



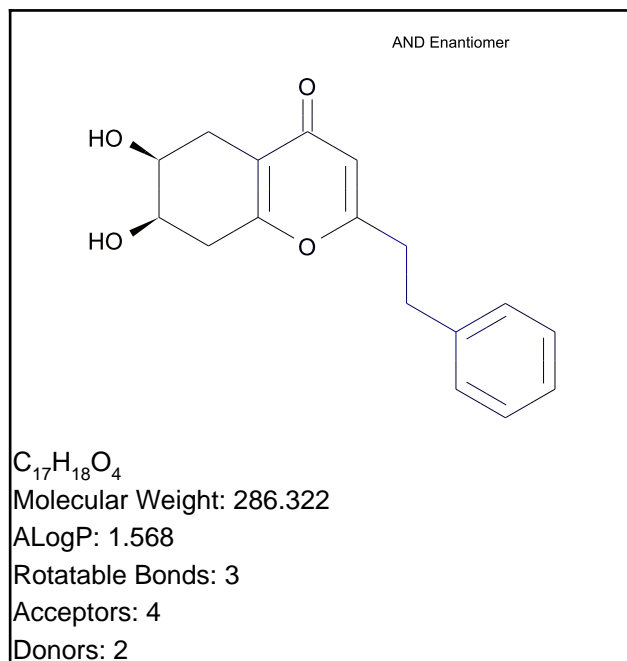

## Model Prediction

Prediction: Single-Carcinogen

Probability: 0.448

Enrichment: 1.2

Bayesian Score: -2.03

Mahalanobis Distance: 13.3

Mahalanobis Distance p-value: 0.000121

Prediction: Positive if the Bayesian score is above the estimated best cutoff value from minimizing the false positive and false negative rate.

Probability: The estimated probability that the sample is in the positive category. This assumes that the Bayesian score follows a normal distribution and is different from the prediction using a cutoff.

Enrichment: An estimate of enrichment, that is, the increased likelihood (versus random) of this sample being in the category.

Bayesian Score: The standard Laplacian-modified Bayesian score.

Mahalanobis Distance: The Mahalanobis distance (MD) is the distance to the center of the training data. The larger the MD, the less trustworthy the prediction.

Mahalanobis Distance p-value: The p-value gives the fraction of training data with an MD greater than or equal to the one for the given sample, assuming normally distributed data. The smaller the p-value, the less trustworthy the prediction. For highly non-normal X properties (e.g., fingerprints), the MD p-value is wildly inaccurate.

## Structural Similar Compounds

| Name               | Aminogluthethimide                                                                  | Phenobarbital                                                                       | Doxefazepam                                                                         |
|--------------------|-------------------------------------------------------------------------------------|-------------------------------------------------------------------------------------|-------------------------------------------------------------------------------------|
| Structure          | 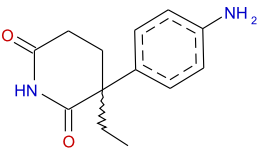 |  |  |
| Actual Endpoint    | Multiple-Carcinogen                                                                 | Single-Carcinogen                                                                   | Multiple-Carcinogen                                                                 |
| Predicted Endpoint | Multiple-Carcinogen                                                                 | Single-Carcinogen                                                                   | Multiple-Carcinogen                                                                 |
| Distance           | 0.574                                                                               | 0.580                                                                               | 0.582                                                                               |
| Reference          | US FDA (Centre for Drug Eval.& Res./Off. Testing & Res.) Sept. 1997                 | US FDA (Centre for Drug Eval.& Res./Off. Testing & Res.) Sept. 1997                 | US FDA (Centre for Drug Eval.& Res./Off. Testing & Res.) Sept. 1997                 |

## Model Applicability

Unknown features are fingerprint features in the query molecule, but not found or appearing too infrequently in the training set.

- OPS PC15 out of range. Value: -3.2503. Training min, max, SD, explained variance: -2.9572, 2.6953, 1.089, 0.0176.

## Feature Contribution

| Top features for positive contribution |             |                                                                                                                                                |       |                                     |
|----------------------------------------|-------------|------------------------------------------------------------------------------------------------------------------------------------------------|-------|-------------------------------------|
| Fingerprint                            | Bit/Smiles  | Feature Structure                                                                                                                              | Score | Multiple-Carcinogen in training set |
| SCFP_4                                 | -1971196727 | 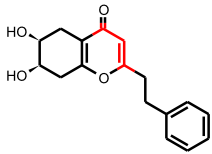<br><chem>*[C](=CC(=O)[C@H]1[C@@H](O)[C@@H](O)O1)C</chem> | 0.295 | 5 out of 11                         |



|                                        |             |                                                                                                                                                        |        |                                     |
|----------------------------------------|-------------|--------------------------------------------------------------------------------------------------------------------------------------------------------|--------|-------------------------------------|
| SCFP_4                                 | 3           | <p>AND Enantiomer</p> 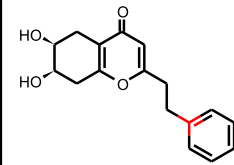 <p>[*]:[cH]:[*]</p>                          | 0.199  | 36 out of 93                        |
| SCFP_4                                 | 0           | <p>AND Enantiomer</p>  <p>[*]C</p>                                  | 0.155  | 41 out of 111                       |
| Top Features for negative contribution |             |                                                                                                                                                        |        |                                     |
| Fingerprint                            | Bit/Smiles  | Feature Structure                                                                                                                                      | Score  | Multiple-Carcinogen in training set |
| SCFP_4                                 | -1272709286 | <p>AND Enantiomer</p>  <p>[*]CC[c](:[*]):[*]</p>                    | -1.16  | 1 out of 17                         |
| SCFP_4                                 | -1211866396 | <p>AND Enantiomer</p>  <p>[*]CC[c]1:[cH]:[cH]:[*]:[cH]:[cH]:1</p> | -1.06  | 0 out of 6                          |
| SCFP_4                                 | -1980361709 | <p>AND Enantiomer</p>  <p>[*]C(=[*])C(=O)C=[*]</p>                | -0.489 | 0 out of 2                          |



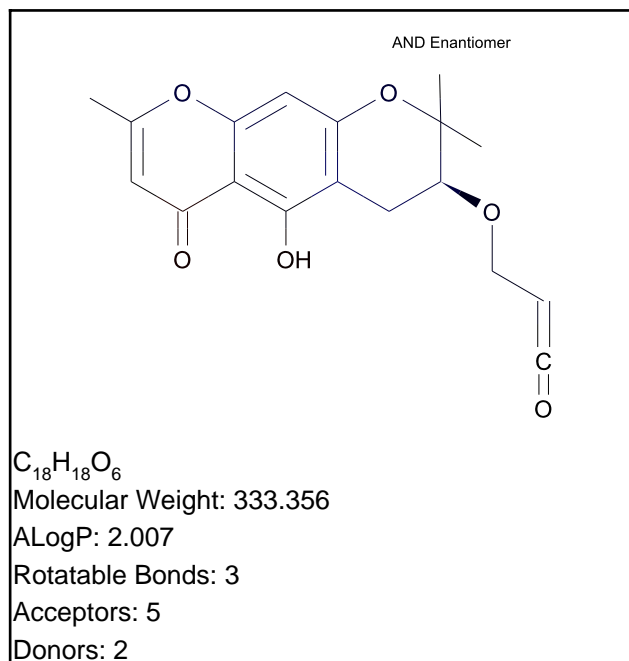

## Model Prediction

Prediction: Single-Carcinogen

Probability: 0.465

Enrichment: 1.24

Bayesian Score: -1.56

Mahalanobis Distance: 17.7

Mahalanobis Distance p-value: 8.28e-009

Prediction: Positive if the Bayesian score is above the estimated best cutoff value from minimizing the false positive and false negative rate.

Probability: The estimated probability that the sample is in the positive category. This assumes that the Bayesian score follows a normal distribution and is different from the prediction using a cutoff.

Enrichment: An estimate of enrichment, that is, the increased likelihood (versus random) of this sample being in the category.

Bayesian Score: The standard Laplacian-modified Bayesian score.

Mahalanobis Distance: The Mahalanobis distance (MD) is the distance to the center of the training data. The larger the MD, the less trustworthy the prediction.

Mahalanobis Distance p-value: The p-value gives the fraction of training data with an MD greater than or equal to the one for the given sample, assuming normally distributed data. The smaller the p-value, the less trustworthy the prediction. For highly non-normal X properties (e.g., fingerprints), the MD p-value is wildly inaccurate.

## Structural Similar Compounds

| Name               | Doxefazepam                                                                         | Phenolphthalein                                                                     | Cytembena                                                                           |
|--------------------|-------------------------------------------------------------------------------------|-------------------------------------------------------------------------------------|-------------------------------------------------------------------------------------|
| Structure          | 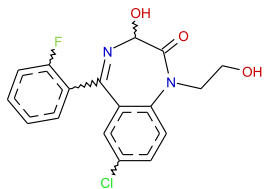 |  |  |
| Actual Endpoint    | Multiple-Carcinogen                                                                 | Single-Carcinogen                                                                   | Multiple-Carcinogen                                                                 |
| Predicted Endpoint | Multiple-Carcinogen                                                                 | Single-Carcinogen                                                                   | Multiple-Carcinogen                                                                 |
| Distance           | 0.582                                                                               | 0.628                                                                               | 0.630                                                                               |
| Reference          | US FDA (Centre for Drug Eval.& Res./Off. Testing & Res.) Sept. 1997                 | US FDA (Centre for Drug Eval.& Res./Off. Testing & Res.) Sept. 1997                 | US FDA (Centre for Drug Eval.& Res./Off. Testing & Res.) Sept. 1997                 |

## Model Applicability

Unknown features are fingerprint features in the query molecule, but not found or appearing too infrequently in the training set.

1. All properties and OPS components are within expected ranges.

## Feature Contribution

### Top features for positive contribution

| Fingerprint | Bit/Smiles  | Feature Structure                                                                                                           | Score | Multiple-Carcinogen in training set |
|-------------|-------------|-----------------------------------------------------------------------------------------------------------------------------|-------|-------------------------------------|
| SCFP_4      | -1971196727 | 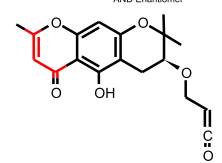<br><chem>*[C](=CC(=[*])[*])[*]</chem> | 0.295 | 5 out of 11                         |

|                                        |             |                                                                                                                                                                                    |        |                                     |
|----------------------------------------|-------------|------------------------------------------------------------------------------------------------------------------------------------------------------------------------------------|--------|-------------------------------------|
| SCFP_4                                 | -1980302127 | <p>AND Enantiomer</p> 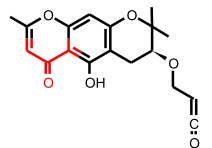 <p>[*]C(=[*])C(=O)[c]([*])[*]</p>                                        | 0.204  | 1 out of 2                          |
| SCFP_4                                 | -424425761  | <p>AND Enantiomer</p>  <p>[*]:[c]([*])O</p>                                                     | 0.201  | 6 out of 15                         |
| Top Features for negative contribution |             |                                                                                                                                                                                    |        |                                     |
| Fingerprint                            | Bit/Smiles  | Feature Structure                                                                                                                                                                  | Score  | Multiple-Carcinogen in training set |
| SCFP_4                                 | -1272709286 | <p>AND Enantiomer</p>  <p>[*]CC[c]([*]):[*]</p>                                                 | -1.16  | 1 out of 17                         |
| SCFP_4                                 | 1238198777  | <p>AND Enantiomer</p>  <p>[*][c]1:[*]:[c]([*]):<br/>[c]2C[*]C([*])([*])O<br/>[c]:2:[cH]:1</p> | -0.489 | 0 out of 2                          |
| SCFP_4                                 | 616547045   | <p>AND Enantiomer</p>  <p>[*]C\C(=C\[*])\O[*]</p>                                             | -0.489 | 0 out of 2                          |



AND Enantiomer

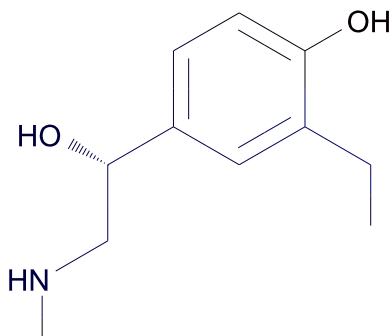C<sub>11</sub>H<sub>17</sub>NO<sub>2</sub>

Molecular Weight: 195.258

ALogP: 1.557

Rotatable Bonds: 4

Acceptors: 3

Donors: 3

## Model Prediction

Prediction: Single-Carcinogen

Probability: 0.377

Enrichment: 1.01

Bayesian Score: -3.64

Mahalanobis Distance: 9.35

Mahalanobis Distance p-value: 0.153

Prediction: Positive if the Bayesian score is above the estimated best cutoff value from minimizing the false positive and false negative rate.

Probability: The estimated probability that the sample is in the positive category. This assumes that the Bayesian score follows a normal distribution and is different from the prediction using a cutoff.

Enrichment: An estimate of enrichment, that is, the increased likelihood (versus random) of this sample being in the category.

Bayesian Score: The standard Laplacian-modified Bayesian score.

Mahalanobis Distance: The Mahalanobis distance (MD) is the distance to the center of the training data. The larger the MD, the less trustworthy the prediction.

Mahalanobis Distance p-value: The p-value gives the fraction of training data with an MD greater than or equal to the one for the given sample, assuming normally distributed data. The smaller the p-value, the less trustworthy the prediction. For highly non-normal X properties (e.g., fingerprints), the MD p-value is wildly inaccurate.

## Structural Similar Compounds

| Name               | Albuterol                                                           | Terbutaline                                                         | Procarrbazine                                                       |
|--------------------|---------------------------------------------------------------------|---------------------------------------------------------------------|---------------------------------------------------------------------|
| Structure          |                                                                     |                                                                     |                                                                     |
| Actual Endpoint    | Single-Carcinogen                                                   | Single-Carcinogen                                                   | Multiple-Carcinogen                                                 |
| Predicted Endpoint | Single-Carcinogen                                                   | Single-Carcinogen                                                   | Multiple-Carcinogen                                                 |
| Distance           | 0.413                                                               | 0.462                                                               | 0.518                                                               |
| Reference          | US FDA (Centre for Drug Eval.& Res./Off. Testing & Res.) Sept. 1997 | US FDA (Centre for Drug Eval.& Res./Off. Testing & Res.) Sept. 1997 | US FDA (Centre for Drug Eval.& Res./Off. Testing & Res.) Sept. 1997 |

## Model Applicability

Unknown features are fingerprint features in the query molecule, but not found or appearing too infrequently in the training set.

1. All properties and OPS components are within expected ranges.

## Feature Contribution

### Top features for positive contribution

| Fingerprint | Bit/Smiles  | Feature Structure                                   | Score | Multiple-Carcinogen in training set |
|-------------|-------------|-----------------------------------------------------|-------|-------------------------------------|
| SCFP_4      | -1374800107 | <p>[*][c]1:[*]:[c]([*]):<br/>[c](O):[cH]:[cH]:1</p> | 0.288 | 10 out of 23                        |

|                                        |             |                                                                                                                                                                   |        |                                     |
|----------------------------------------|-------------|-------------------------------------------------------------------------------------------------------------------------------------------------------------------|--------|-------------------------------------|
| SCFP_4                                 | -424425761  | <p>AND Enantiomer</p> 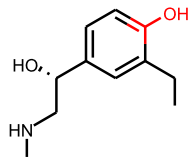 <p>[*]:[c](:[*])O</p>                                   | 0.201  | 6 out of 15                         |
| SCFP_4                                 | 3           | <p>AND Enantiomer</p>  <p>[*]:[cH]:[*]</p>                                     | 0.199  | 36 out of 93                        |
| Top Features for negative contribution |             |                                                                                                                                                                   |        |                                     |
| Fingerprint                            | Bit/Smiles  | Feature Structure                                                                                                                                                 | Score  | Multiple-Carcinogen in training set |
| SCFP_4                                 | -1272709286 | <p>AND Enantiomer</p>  <p>[*]CC[c](:[*]):[*]</p>                               | -1.16  | 1 out of 17                         |
| SCFP_4                                 | -1931277081 | <p>AND Enantiomer</p>  <p>[*]C[c]1:[cH]:[*]:[cH]<br/>:[cH]:[c]:1O</p>        | -0.489 | 0 out of 2                          |
| SCFP_4                                 | -350503170  | <p>AND Enantiomer</p>  <p>[*]C[c]1:[cH]:[c](:[cH]:[*]:[c]:1[*])C([*])[*]</p> | -0.489 | 0 out of 2                          |





AND Enantiomer

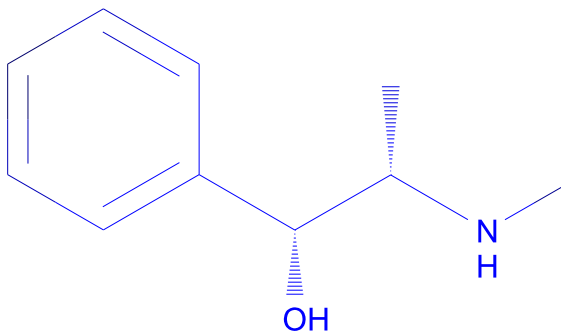C<sub>10</sub>H<sub>15</sub>NO

Molecular Weight: 165.232

ALogP: 1.234

Rotatable Bonds: 3

Acceptors: 2

Donors: 2

## Model Prediction

Prediction: Non-Carcinogen

Probability: 0.182

Enrichment: 0.544

Bayesian Score: -8.68

Mahalanobis Distance: 8.88

Mahalanobis Distance p-value: 0.966

Prediction: Positive if the Bayesian score is above the estimated best cutoff value from minimizing the false positive and false negative rate.

Probability: The estimated probability that the sample is in the positive category. This assumes that the Bayesian score follows a normal distribution and is different from the prediction using a cutoff.

Enrichment: An estimate of enrichment, that is, the increased likelihood (versus random) of this sample being in the category.

Bayesian Score: The standard Laplacian-modified Bayesian score.

Mahalanobis Distance: The Mahalanobis distance (MD) is the distance to the center of the training data. The larger the MD, the less trustworthy the prediction.

Mahalanobis Distance p-value: The p-value gives the fraction of training data with an MD greater than or equal to the one for the given sample, assuming normally distributed data. The smaller the p-value, the less trustworthy the prediction. For highly non-normal X properties (e.g., fingerprints), the MD p-value is wildly inaccurate.

## Structural Similar Compounds

| Name               | Ephedrine                                                           | Amphetamine                                                         | Pronetalol                                                          |
|--------------------|---------------------------------------------------------------------|---------------------------------------------------------------------|---------------------------------------------------------------------|
| Structure          |                                                                     |                                                                     |                                                                     |
| Actual Endpoint    | Non-Carcinogen                                                      | Non-Carcinogen                                                      | Carcinogen                                                          |
| Predicted Endpoint | Non-Carcinogen                                                      | Non-Carcinogen                                                      | Non-Carcinogen                                                      |
| Distance           | 0.000                                                               | 0.515                                                               | 0.522                                                               |
| Reference          | US FDA (Centre for Drug Eval.& Res./Off. Testing & Res.) Sept. 1997 | US FDA (Centre for Drug Eval.& Res./Off. Testing & Res.) Sept. 1997 | US FDA (Centre for Drug Eval.& Res./Off. Testing & Res.) Sept. 1997 |

## Model Applicability

Unknown features are fingerprint features in the query molecule, but not found or appearing too infrequently in the training set.

1. All properties and OPS components are within expected ranges.

## Feature Contribution

### Top Features for negative contribution

| Fingerprint | Bit/Smiles | Feature Structure                                       | Score | Carcinogen in training set |
|-------------|------------|---------------------------------------------------------|-------|----------------------------|
| SCFP_6      | 1702724181 | <p>AND Enantiomer</p> <p>[*]C([*])[C@H](O)[*]([*])N</p> | -1.22 | 1 out of 18                |

|        |            |                                                                                                                                                                                                                     |        |             |
|--------|------------|---------------------------------------------------------------------------------------------------------------------------------------------------------------------------------------------------------------------|--------|-------------|
| SCFP_6 | -561151481 | <p>AND Enantiomer</p> 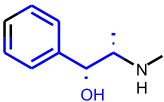 <p><chem>[*]C([*])[C@H](O)[c]1</chem><br/> <chem>:[cH]:[cH]:[*]:[cH]:</chem><br/> <chem>[cH]:1</chem></p> | -1.07  | 1 out of 15 |
| SCFP_6 | 1318513260 | <p>AND Enantiomer</p>  <p><chem>[*]N[C@@H](C)[C@H](O)</chem><br/> <chem>[c](:[cH]:[*]):[cH]:</chem><br/> <chem>[*]</chem></p>    | -0.957 | 0 out of 5  |

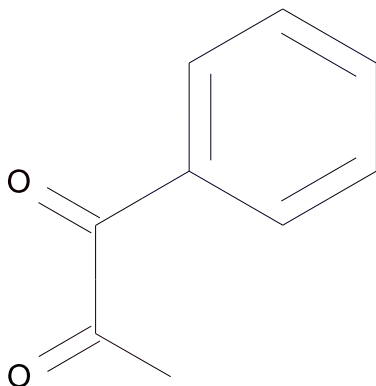C<sub>9</sub>H<sub>8</sub>O<sub>2</sub>

Molecular Weight: 148.159

ALogP: 1.446

Rotatable Bonds: 2

Acceptors: 2

Donors: 0

## Model Prediction

**Prediction: Carcinogen**

Probability: 0.379

Enrichment: 1.13

Bayesian Score: 0.756

Mahalanobis Distance: 9.11

Mahalanobis Distance p-value: 0.936

Prediction: Positive if the Bayesian score is above the estimated best cutoff value from minimizing the false positive and false negative rate.

Probability: The estimated probability that the sample is in the positive category. This assumes that the Bayesian score follows a normal distribution and is different from the prediction using a cutoff.

Enrichment: An estimate of enrichment, that is, the increased likelihood (versus random) of this sample being in the category.

Bayesian Score: The standard Laplacian-modified Bayesian score.

Mahalanobis Distance: The Mahalanobis distance (MD) is the distance to the center of the training data. The larger the MD, the less trustworthy the prediction.

Mahalanobis Distance p-value: The p-value gives the fraction of training data with an MD greater than or equal to the one for the given sample, assuming normally distributed data. The smaller the p-value, the less trustworthy the prediction. For highly non-normal X properties (e.g., fingerprints), the MD p-value is wildly inaccurate.

## Structural Similar Compounds

| Name               | Coumarin                                                            | Antipyrine                                                          | Phenacetin                                                          |
|--------------------|---------------------------------------------------------------------|---------------------------------------------------------------------|---------------------------------------------------------------------|
| Structure          |                                                                     |                                                                     |                                                                     |
| Actual Endpoint    | Carcinogen                                                          | Carcinogen                                                          | Carcinogen                                                          |
| Predicted Endpoint | Carcinogen                                                          | Carcinogen                                                          | Carcinogen                                                          |
| Distance           | 0.525                                                               | 0.547                                                               | 0.583                                                               |
| Reference          | US FDA (Centre for Drug Eval.& Res./Off. Testing & Res.) Sept. 1997 | US FDA (Centre for Drug Eval.& Res./Off. Testing & Res.) Sept. 1997 | US FDA (Centre for Drug Eval.& Res./Off. Testing & Res.) Sept. 1997 |

## Model Applicability

Unknown features are fingerprint features in the query molecule, but not found or appearing too infrequently in the training set.

1. All properties and OPS components are within expected ranges.

## Feature Contribution

### Top features for positive contribution

| Fingerprint | Bit/Smiles | Feature Structure                                              | Score | Carcinogen in training set |
|-------------|------------|----------------------------------------------------------------|-------|----------------------------|
| SCFP_6      | -541146916 | <br><chem>[*]C(=[*])C(=O)[c]1:[cH]:[cH]:[*]:[cH]:[cH]:1</chem> | 0.415 | 1 out of 1                 |

| SCFP_6                                 | 136627117   | 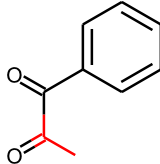<br><chem>[*]C(=[*])C</chem>                                | 0.167  | 18 out of 47               |
|----------------------------------------|-------------|------------------------------------------------------------------------------------------------------------------------------------------------|--------|----------------------------|
| SCFP_6                                 | 13          | <br><chem>[*]=O</chem>                                      | 0.0717 | 90 out of 261              |
| Top Features for negative contribution |             |                                                                                                                                                |        |                            |
| Fingerprint                            | Bit/Smiles  | Feature Structure                                                                                                                              | Score  | Carcinogen in training set |
| SCFP_6                                 | 1653911926  | <br><chem>[*][c]1:[cH]:[cH]:[cH]:[cH]:[cH]:1</chem>         | -0.504 | 12 out of 64               |
| SCFP_6                                 | -2056718782 | <br><chem>[*]C(=[*])[c](:[cH]:[*]):[cH]:[*]</chem>         | -0.219 | 23 out of 90               |
| SCFP_6                                 | 387787917   | <br><chem>[*]C(=[*])[c]1:[cH]:[*]:[cH]:[cH]:[cH]:1</chem> | -0.164 | 14 out of 52               |

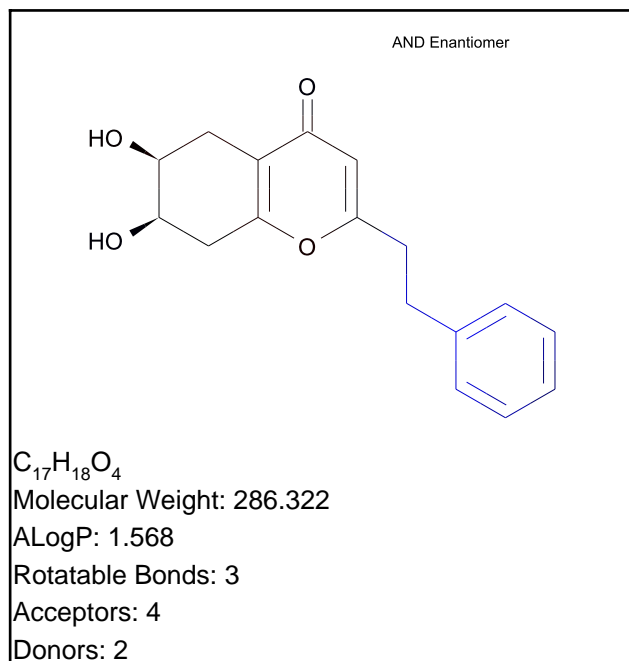

## Model Prediction

Prediction: Non-Carcinogen

Probability: 0.275

Enrichment: 0.822

Bayesian Score: -3.21

Mahalanobis Distance: 12.2

Mahalanobis Distance p-value: 0.0174

Prediction: Positive if the Bayesian score is above the estimated best cutoff value from minimizing the false positive and false negative rate.

Probability: The estimated probability that the sample is in the positive category. This assumes that the Bayesian score follows a normal distribution and is different from the prediction using a cutoff.

Enrichment: An estimate of enrichment, that is, the increased likelihood (versus random) of this sample being in the category.

Bayesian Score: The standard Laplacian-modified Bayesian score.

Mahalanobis Distance: The Mahalanobis distance (MD) is the distance to the center of the training data. The larger the MD, the less trustworthy the prediction.

Mahalanobis Distance p-value: The p-value gives the fraction of training data with an MD greater than or equal to the one for the given sample, assuming normally distributed data. The smaller the p-value, the less trustworthy the prediction. For highly non-normal X properties (e.g., fingerprints), the MD p-value is wildly inaccurate.

## Structural Similar Compounds

| Name               | Tolazamide                                                                          | Naltrexone                                                                          | Phenobarbital                                                                       |
|--------------------|-------------------------------------------------------------------------------------|-------------------------------------------------------------------------------------|-------------------------------------------------------------------------------------|
| Structure          | 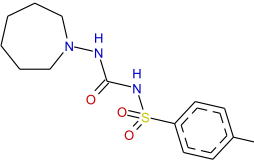 |  |  |
| Actual Endpoint    | Non-Carcinogen                                                                      | Non-Carcinogen                                                                      | Carcinogen                                                                          |
| Predicted Endpoint | Non-Carcinogen                                                                      | Non-Carcinogen                                                                      | Carcinogen                                                                          |
| Distance           | 0.536                                                                               | 0.585                                                                               | 0.598                                                                               |
| Reference          | US FDA (Centre for Drug Eval.& Res./Off. Testing & Res.) Sept. 1997                 | US FDA (Centre for Drug Eval.& Res./Off. Testing & Res.) Sept. 1997                 | US FDA (Centre for Drug Eval.& Res./Off. Testing & Res.) Sept. 1997                 |

## Model Applicability

Unknown features are fingerprint features in the query molecule, but not found or appearing too infrequently in the training set.

1. OPS PC29 out of range. Value: -4.2515. Training min, max, SD, explained variance: -3.1746, 3.7825, 1.007, 0.0095.

## Feature Contribution

### Top features for positive contribution

| Fingerprint | Bit/Smiles  | Feature Structure                                                                                                          | Score | Carcinogen in training set |
|-------------|-------------|----------------------------------------------------------------------------------------------------------------------------|-------|----------------------------|
| SCFP_6      | -1971196727 | 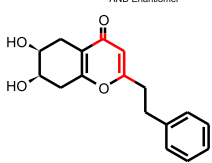<br><chem>*]C(=CC(=[*])[*])[*]</chem> | 0.361 | 17 out of 36               |

|                                        |             |                                                                                                                                                         |        |                            |
|----------------------------------------|-------------|---------------------------------------------------------------------------------------------------------------------------------------------------------|--------|----------------------------|
| SCFP_6                                 | 55464376    | <p>AND Enantiomer</p> 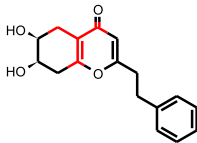 <p>[*]CC(=C([*])([*])C(=[*])[*])</p>          | 0.345  | 14 out of 30               |
| SCFP_6                                 | -1272768868 | <p>AND Enantiomer</p>  <p>[*]C([*])CC(=[*])([*])</p>                 | 0.242  | 26 out of 63               |
| Top Features for negative contribution |             |                                                                                                                                                         |        |                            |
| Fingerprint                            | Bit/Smiles  | Feature Structure                                                                                                                                       | Score  | Carcinogen in training set |
| SCFP_6                                 | -1211866396 | <p>AND Enantiomer</p>  <p>[*]CC[c]1:[cH]:[cH]:[*]:[cH]:[cH]:1</p>    | -1.1   | 2 out of 25                |
| SCFP_6                                 | -1640858361 | <p>AND Enantiomer</p>  <p>[*]CC[c]1:[cH]:[cH]:[cH]:[cH]:[cH]:1</p> | -0.817 | 1 out of 11                |
| SCFP_6                                 | -1852892018 | <p>AND Enantiomer</p>  <p>[*]C(=[*])CC[c]([cH]:[*]):[cH]:[*]</p>   | -0.674 | 0 out of 3                 |

AND Enantiomer

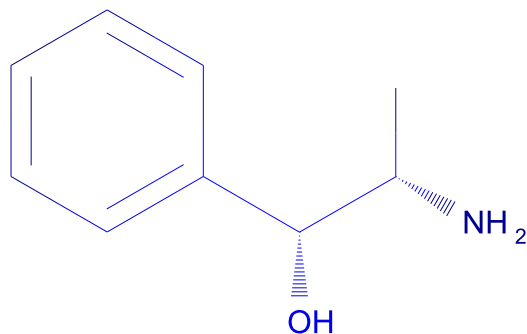C<sub>9</sub>H<sub>13</sub>NO

Molecular Weight: 151.206

ALogP: 0.802

Rotatable Bonds: 2

Acceptors: 2

Donors: 2

## Model Prediction

Prediction: Non-Carcinogen

Probability: 0.214

Enrichment: 0.641

Bayesian Score: -6.4

Mahalanobis Distance: 8.47

Mahalanobis Distance p-value: 0.991

Prediction: Positive if the Bayesian score is above the estimated best cutoff value from minimizing the false positive and false negative rate.

Probability: The estimated probability that the sample is in the positive category. This assumes that the Bayesian score follows a normal distribution and is different from the prediction using a cutoff.

Enrichment: An estimate of enrichment, that is, the increased likelihood (versus random) of this sample being in the category.

Bayesian Score: The standard Laplacian-modified Bayesian score.

Mahalanobis Distance: The Mahalanobis distance (MD) is the distance to the center of the training data. The larger the MD, the less trustworthy the prediction.

Mahalanobis Distance p-value: The p-value gives the fraction of training data with an MD greater than or equal to the one for the given sample, assuming normally distributed data. The smaller the p-value, the less trustworthy the prediction. For highly non-normal X properties (e.g., fingerprints), the MD p-value is wildly inaccurate.

## Structural Similar Compounds

| Name               | Ephedrine                                                           | Tocainide                                                           | Amphetamine                                                         |
|--------------------|---------------------------------------------------------------------|---------------------------------------------------------------------|---------------------------------------------------------------------|
| Structure          |                                                                     |                                                                     |                                                                     |
| Actual Endpoint    | Non-Carcinogen                                                      | Non-Carcinogen                                                      | Non-Carcinogen                                                      |
| Predicted Endpoint | Non-Carcinogen                                                      | Carcinogen                                                          | Non-Carcinogen                                                      |
| Distance           | 0.314                                                               | 0.489                                                               | 0.514                                                               |
| Reference          | US FDA (Centre for Drug Eval.& Res./Off. Testing & Res.) Sept. 1997 | US FDA (Centre for Drug Eval.& Res./Off. Testing & Res.) Sept. 1997 | US FDA (Centre for Drug Eval.& Res./Off. Testing & Res.) Sept. 1997 |

## Model Applicability

Unknown features are fingerprint features in the query molecule, but not found or appearing too infrequently in the training set.

1. All properties and OPS components are within expected ranges.

## Feature Contribution

### Top Features for negative contribution

| Fingerprint | Bit/Smiles | Feature Structure                                         | Score | Carcinogen in training set |
|-------------|------------|-----------------------------------------------------------|-------|----------------------------|
| SCFP_6      | 1702724181 | <p>AND Enantiomer</p> <p>[*]C([*])[C@H](O)[c]([*])[*]</p> | -1.22 | 1 out of 18                |

|        |            |                                                                                                                                                                                              |        |             |
|--------|------------|----------------------------------------------------------------------------------------------------------------------------------------------------------------------------------------------|--------|-------------|
| SCFP_6 | -561151481 | <p>AND Enantiomer</p> 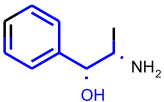 <p><chem>[*]C([*])[C@H](O)[c]1:[cH]:[cH]:[*]:[cH]:[cH]:1</chem></p>                | -1.07  | 1 out of 15 |
| SCFP_6 | 1318513260 | <p>AND Enantiomer</p>  <p><chem>[*]N[C@@H](C)[C@H](O)</chem><br/> <chem>[c]([cH]:[*]):[cH]:[*]</chem></p> | -0.957 | 0 out of 5  |



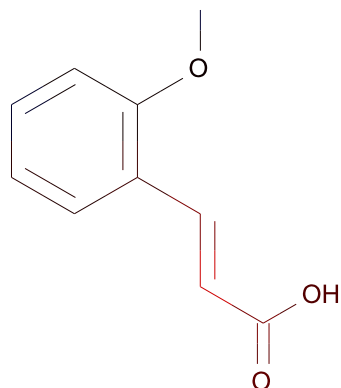C<sub>10</sub>H<sub>10</sub>O<sub>3</sub>

Molecular Weight: 178.185

ALogP: 1.911

Rotatable Bonds: 3

Acceptors: 3

Donors: 1

## Model Prediction

**Prediction: Carcinogen**

Probability: 0.426

Enrichment: 1.27

Bayesian Score: 2.23

Mahalanobis Distance: 10.8

Mahalanobis Distance p-value: 0.281

Prediction: Positive if the Bayesian score is above the estimated best cutoff value from minimizing the false positive and false negative rate.

Probability: The estimated probability that the sample is in the positive category. This assumes that the Bayesian score follows a normal distribution and is different from the prediction using a cutoff.

Enrichment: An estimate of enrichment, that is, the increased likelihood (versus random) of this sample being in the category.

Bayesian Score: The standard Laplacian-modified Bayesian score.

Mahalanobis Distance: The Mahalanobis distance (MD) is the distance to the center of the training data. The larger the MD, the less trustworthy the prediction.

Mahalanobis Distance p-value: The p-value gives the fraction of training data with an MD greater than or equal to the one for the given sample, assuming normally distributed data. The smaller the p-value, the less trustworthy the prediction. For highly non-normal X properties (e.g., fingerprints), the MD p-value is wildly inaccurate.

## Structural Similar Compounds

| Name               | Aspirin                                                             | Coumarin                                                            | Naproxen                                                            |
|--------------------|---------------------------------------------------------------------|---------------------------------------------------------------------|---------------------------------------------------------------------|
| Structure          |                                                                     |                                                                     |                                                                     |
| Actual Endpoint    | Non-Carcinogen                                                      | Carcinogen                                                          | Non-Carcinogen                                                      |
| Predicted Endpoint | Non-Carcinogen                                                      | Carcinogen                                                          | Non-Carcinogen                                                      |
| Distance           | 0.507                                                               | 0.511                                                               | 0.528                                                               |
| Reference          | US FDA (Centre for Drug Eval.& Res./Off. Testing & Res.) Sept. 1997 | US FDA (Centre for Drug Eval.& Res./Off. Testing & Res.) Sept. 1997 | US FDA (Centre for Drug Eval.& Res./Off. Testing & Res.) Sept. 1997 |

## Model Applicability

Unknown features are fingerprint features in the query molecule, but not found or appearing too infrequently in the training set.

1. All properties and OPS components are within expected ranges.

## Feature Contribution

### Top features for positive contribution

| Fingerprint | Bit/Smiles | Feature Structure                                         | Score | Carcinogen in training set |
|-------------|------------|-----------------------------------------------------------|-------|----------------------------|
| SCFP_6      | 966282057  | <br><chem>[*]O[c]1:[cH]:[*]:[cH]:[cH]:[c]:1\C=C[*]</chem> | 0.603 | 2 out of 2                 |

| SCFP_6                                 | 2109620068  | 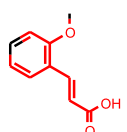<br><chem>[*]O[c]1:[cH]:[*]:[cH]:[cH]:[c]:1\C=C\C(=O)O</chem> | 0.603  | 2 out of 2                 |
|----------------------------------------|-------------|--------------------------------------------------------------------------------------------------------------------------------------------------|--------|----------------------------|
| SCFP_6                                 | -1971137145 | <br><chem>[*]\C=C\[c](:[*]):[*]</chem>                        | 0.434  | 5 out of 9                 |
| Top Features for negative contribution |             |                                                                                                                                                  |        |                            |
| Fingerprint                            | Bit/Smiles  | Feature Structure                                                                                                                                | Score  | Carcinogen in training set |
| SCFP_6                                 | 503541685   | <br><chem>[*]=C[c]1:[cH]:[*]:[cH]:[cH]:[c]:1OC</chem>         | -0.484 | 1 out of 7                 |
| SCFP_6                                 | 1434056623  | <br><chem>[*]=C[c]1:[cH]:[cH]:[cH]:[cH]:[c]:1OC</chem>       | -0.278 | 0 out of 1                 |
| SCFP_6                                 | -2056718782 | <br><chem>[*]C(=[*])[c](:[cH]:[*]):[cH]:[*]</chem>          | -0.219 | 23 out of 90               |

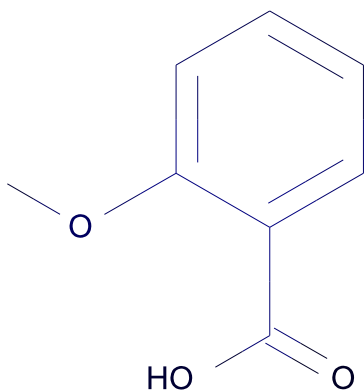C<sub>8</sub>H<sub>8</sub>O<sub>3</sub>

Molecular Weight: 152.147

ALogP: 1.443

Rotatable Bonds: 2

Acceptors: 3

Donors: 1

## Model Prediction

Prediction: Non-Carcinogen

Probability: 0.296

Enrichment: 0.886

Bayesian Score: -2.28

Mahalanobis Distance: 10.4

Mahalanobis Distance p-value: 0.442

Prediction: Positive if the Bayesian score is above the estimated best cutoff value from minimizing the false positive and false negative rate.

Probability: The estimated probability that the sample is in the positive category. This assumes that the Bayesian score follows a normal distribution and is different from the prediction using a cutoff.

Enrichment: An estimate of enrichment, that is, the increased likelihood (versus random) of this sample being in the category.

Bayesian Score: The standard Laplacian-modified Bayesian score.

Mahalanobis Distance: The Mahalanobis distance (MD) is the distance to the center of the training data. The larger the MD, the less trustworthy the prediction.

Mahalanobis Distance p-value: The p-value gives the fraction of training data with an MD greater than or equal to the one for the given sample, assuming normally distributed data. The smaller the p-value, the less trustworthy the prediction. For highly non-normal X properties (e.g., fingerprints), the MD p-value is wildly inaccurate.

## Structural Similar Compounds

| Name               | Aspirin                                                             | Phenacetin                                                          | Acetaminophen                                                       |
|--------------------|---------------------------------------------------------------------|---------------------------------------------------------------------|---------------------------------------------------------------------|
| Structure          |                                                                     |                                                                     |                                                                     |
| Actual Endpoint    | Non-Carcinogen                                                      | Carcinogen                                                          | Carcinogen                                                          |
| Predicted Endpoint | Non-Carcinogen                                                      | Carcinogen                                                          | Carcinogen                                                          |
| Distance           | 0.369                                                               | 0.559                                                               | 0.580                                                               |
| Reference          | US FDA (Centre for Drug Eval.& Res./Off. Testing & Res.) Sept. 1997 | US FDA (Centre for Drug Eval.& Res./Off. Testing & Res.) Sept. 1997 | US FDA (Centre for Drug Eval.& Res./Off. Testing & Res.) Sept. 1997 |

## Model Applicability

Unknown features are fingerprint features in the query molecule, but not found or appearing too infrequently in the training set.

1. All properties and OPS components are within expected ranges.

## Feature Contribution

### Top features for positive contribution

| Fingerprint | Bit/Smiles | Feature Structure | Score  | Carcinogen in training set |
|-------------|------------|-------------------|--------|----------------------------|
| SCFP_6      | 13         |                   | 0.0717 | 90 out of 261              |

### Top Features for negative contribution

| Fingerprint | Bit/Smiles | Feature Structure | Score | Carcinogen in training set |
|-------------|------------|-------------------|-------|----------------------------|
|             |            |                   |       |                            |

|        |            |                                                                                                                                     |        |            |
|--------|------------|-------------------------------------------------------------------------------------------------------------------------------------|--------|------------|
| SCFP_6 | 503541685  | 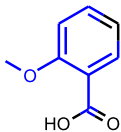 <p>[*]=C[c]1:[cH]:[*]:[cH]:[cH]:[c]:1OC</p>     | -0.484 | 1 out of 7 |
| SCFP_6 | 1434056623 |  <p>[*]=C[c]1:[cH]:[cH]:[cH]:[cH]:[c]:1OC</p>    | -0.278 | 0 out of 1 |
| SCFP_6 | 1726855784 |  <p>[*]O[c]1:[cH]:[cH]:[cH]:[cH]:[c]:1C(=O)O</p> | -0.278 | 0 out of 1 |

AND Enantiomer

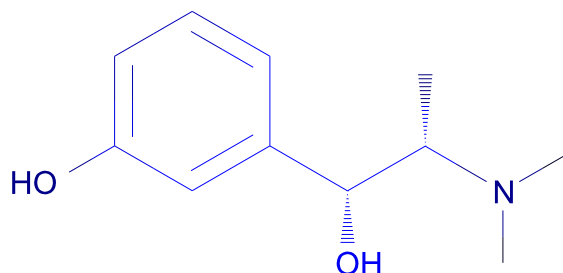C<sub>11</sub>H<sub>17</sub>NO<sub>2</sub>

Molecular Weight: 195.258

ALogP: 1.528

Rotatable Bonds: 3

Acceptors: 3

Donors: 2

## Model Prediction

Prediction: Non-Carcinogen

Probability: 0.18

Enrichment: 0.54

Bayesian Score: -8.79

Mahalanobis Distance: 9.77

Mahalanobis Distance p-value: 0.75

Prediction: Positive if the Bayesian score is above the estimated best cutoff value from minimizing the false positive and false negative rate.

Probability: The estimated probability that the sample is in the positive category. This assumes that the Bayesian score follows a normal distribution and is different from the prediction using a cutoff.

Enrichment: An estimate of enrichment, that is, the increased likelihood (versus random) of this sample being in the category.

Bayesian Score: The standard Laplacian-modified Bayesian score.

Mahalanobis Distance: The Mahalanobis distance (MD) is the distance to the center of the training data. The larger the MD, the less trustworthy the prediction.

Mahalanobis Distance p-value: The p-value gives the fraction of training data with an MD greater than or equal to the one for the given sample, assuming normally distributed data. The smaller the p-value, the less trustworthy the prediction. For highly non-normal X properties (e.g., fingerprints), the MD p-value is wildly inaccurate.

## Structural Similar Compounds

| Name               | Ephedrine                                                           | Phenylephrine                                                       | Pronetalol                                                          |
|--------------------|---------------------------------------------------------------------|---------------------------------------------------------------------|---------------------------------------------------------------------|
| Structure          |                                                                     |                                                                     |                                                                     |
| Actual Endpoint    | Non-Carcinogen                                                      | Non-Carcinogen                                                      | Carcinogen                                                          |
| Predicted Endpoint | Non-Carcinogen                                                      | Non-Carcinogen                                                      | Non-Carcinogen                                                      |
| Distance           | 0.399                                                               | 0.431                                                               | 0.543                                                               |
| Reference          | US FDA (Centre for Drug Eval.& Res./Off. Testing & Res.) Sept. 1997 | US FDA (Centre for Drug Eval.& Res./Off. Testing & Res.) Sept. 1997 | US FDA (Centre for Drug Eval.& Res./Off. Testing & Res.) Sept. 1997 |

## Model Applicability

Unknown features are fingerprint features in the query molecule, but not found or appearing too infrequently in the training set.

1. All properties and OPS components are within expected ranges.

## Feature Contribution

### Top features for positive contribution

| Fingerprint | Bit/Smiles | Feature Structure                                                     | Score | Carcinogen in training set |
|-------------|------------|-----------------------------------------------------------------------|-------|----------------------------|
| SCFP_6      | 611156666  | <p>AND Enantiomer</p> <p>[*][c]1:[*]:[cH]:[cH]<br/>:[c](O):[cH]:1</p> | 0.186 | 6 out of 15                |

### Top Features for negative contribution

| Fingerprint | Bit/Smiles | Feature Structure | Score | Carcinogen in training set |
|-------------|------------|-------------------|-------|----------------------------|
|             |            |                   |       |                            |

|        |             |                                                                                                                                                                           |       |             |
|--------|-------------|---------------------------------------------------------------------------------------------------------------------------------------------------------------------------|-------|-------------|
| SCFP_6 | 1702724181  | <p>AND Enantiomer</p> 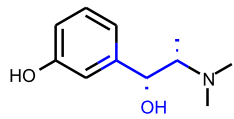 <p><chem>[*]C([*])[C@H](O)[c]([*])[*]</chem></p>                | -1.22 | 1 out of 18 |
| SCFP_6 | -1632615624 | <p>AND Enantiomer</p>  <p><chem>[*]C([*])[c]1:[cH]:[cH]:[cH]:[c](O):[cH]:1</chem></p>  | -1.07 | 0 out of 6  |
| SCFP_6 | -561151481  | <p>AND Enantiomer</p>  <p><chem>[*]C([*])[C@H](O)[c]1:[cH]:[cH]:[cH]:[cH]:1</chem></p> | -1.07 | 1 out of 15 |

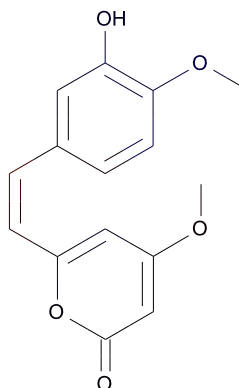C<sub>15</sub>H<sub>14</sub>O<sub>5</sub>

Molecular Weight: 274.269

ALogP: 1.969

Rotatable Bonds: 4

Acceptors: 5

Donors: 1

## Model Prediction

Prediction: Non-Carcinogen

Probability: 0.35

Enrichment: 1.05

Bayesian Score: -0.232

Mahalanobis Distance: 13

Mahalanobis Distance p-value: 0.00175

Prediction: Positive if the Bayesian score is above the estimated best cutoff value from minimizing the false positive and false negative rate.

Probability: The estimated probability that the sample is in the positive category. This assumes that the Bayesian score follows a normal distribution and is different from the prediction using a cutoff.

Enrichment: An estimate of enrichment, that is, the increased likelihood (versus random) of this sample being in the category.

Bayesian Score: The standard Laplacian-modified Bayesian score.

Mahalanobis Distance: The Mahalanobis distance (MD) is the distance to the center of the training data. The larger the MD, the less trustworthy the prediction.

Mahalanobis Distance p-value: The p-value gives the fraction of training data with an MD greater than or equal to the one for the given sample, assuming normally distributed data. The smaller the p-value, the less trustworthy the prediction. For highly non-normal X properties (e.g., fingerprints), the MD p-value is wildly inaccurate.

## Structural Similar Compounds

| Name               | Cytembena                                                           | Atropine                                                            | Scopolamine                                                         |
|--------------------|---------------------------------------------------------------------|---------------------------------------------------------------------|---------------------------------------------------------------------|
| Structure          |                                                                     |                                                                     |                                                                     |
| Actual Endpoint    | Carcinogen                                                          | Non-Carcinogen                                                      | Non-Carcinogen                                                      |
| Predicted Endpoint | Carcinogen                                                          | Non-Carcinogen                                                      | Non-Carcinogen                                                      |
| Distance           | 0.478                                                               | 0.588                                                               | 0.588                                                               |
| Reference          | US FDA (Centre for Drug Eval.& Res./Off. Testing & Res.) Sept. 1997 | US FDA (Centre for Drug Eval.& Res./Off. Testing & Res.) Sept. 1997 | US FDA (Centre for Drug Eval.& Res./Off. Testing & Res.) Sept. 1997 |

## Model Applicability

Unknown features are fingerprint features in the query molecule, but not found or appearing too infrequently in the training set.

1. OPS PC10 out of range. Value: -4.2526. Training min, max, SD, explained variance: -4.2502, 5.657, 1.784, 0.0297.

## Feature Contribution

### Top features for positive contribution

| Fingerprint | Bit/Smiles  | Feature Structure          | Score | Carcinogen in training set |
|-------------|-------------|----------------------------|-------|----------------------------|
| SCFP_6      | -1971137145 | <br>[*]C=C[c]([*]):[*]:[*] | 0.434 | 5 out of 9                 |

| SCFP_6                                 | 392579710  | 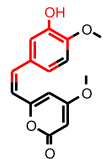<br><chem>[*][c]1:[*]:[cH]:[c](C=[*]):[cH]:[c]:1O</chem>      | 0.425  | 2 out of 3                 |
|----------------------------------------|------------|--------------------------------------------------------------------------------------------------------------------------------------------------|--------|----------------------------|
| SCFP_6                                 | 1977229858 | <br><chem>[*]C(=[*])C=C\[c]([c]([c]([*]):[c]([*]):[*])</chem> | 0.425  | 2 out of 3                 |
| Top Features for negative contribution |            |                                                                                                                                                  |        |                            |
| Fingerprint                            | Bit/Smiles | Feature Structure                                                                                                                                | Score  | Carcinogen in training set |
| SCFP_6                                 | 2116304939 | <br><chem>[*]O[c]1:[cH]:[*]:[c]([*]):[cH]:[c]:1O</chem>       | -0.825 | 0 out of 4                 |
| SCFP_6                                 | 1559374977 | <br><chem>[*]C1=[*]C(=CC(=O)O1)[*]</chem>                    | -0.278 | 0 out of 1                 |
| SCFP_6                                 | 1616083408 | <br><chem>[*]=CC1=C[*]=CC(=O)O1</chem>                      | -0.278 | 0 out of 1                 |



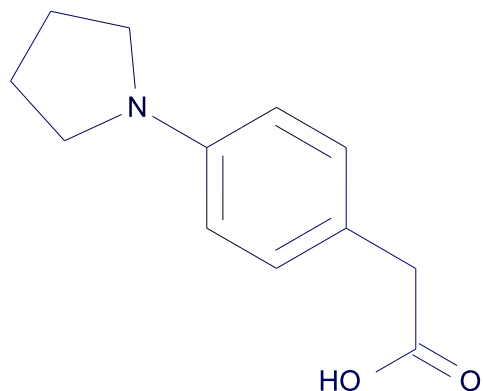

$C_{12}H_{15}NO_2$

Molecular Weight: 205.253

ALogP: 2.117

Rotatable Bonds: 3

Acceptors: 3

Donors: 1

## Model Prediction

Prediction: Non-Carcinogen

Probability: 0.266

Enrichment: 0.797

Bayesian Score: -3.6

Mahalanobis Distance: 8.82

Mahalanobis Distance p-value: 0.971

Prediction: Positive if the Bayesian score is above the estimated best cutoff value from minimizing the false positive and false negative rate.

Probability: The estimated probability that the sample is in the positive category. This assumes that the Bayesian score follows a normal distribution and is different from the prediction using a cutoff.

Enrichment: An estimate of enrichment, that is, the increased likelihood (versus random) of this sample being in the category.

Bayesian Score: The standard Laplacian-modified Bayesian score.

Mahalanobis Distance: The Mahalanobis distance (MD) is the distance to the center of the training data. The larger the MD, the less trustworthy the prediction.

Mahalanobis Distance p-value: The p-value gives the fraction of training data with an MD greater than or equal to the one for the given sample, assuming normally distributed data. The smaller the p-value, the less trustworthy the prediction. For highly non-normal X properties (e.g., fingerprints), the MD p-value is wildly inaccurate.

## Structural Similar Compounds

| Name               | Naproxen                                                            | Methylphenidate                                                     | Eugenol                                                             |
|--------------------|---------------------------------------------------------------------|---------------------------------------------------------------------|---------------------------------------------------------------------|
| Structure          |                                                                     |                                                                     |                                                                     |
| Actual Endpoint    | Non-Carcinogen                                                      | Non-Carcinogen                                                      | Non-Carcinogen                                                      |
| Predicted Endpoint | Non-Carcinogen                                                      | Non-Carcinogen                                                      | Non-Carcinogen                                                      |
| Distance           | 0.490                                                               | 0.500                                                               | 0.543                                                               |
| Reference          | US FDA (Centre for Drug Eval.& Res./Off. Testing & Res.) Sept. 1997 | US FDA (Centre for Drug Eval.& Res./Off. Testing & Res.) Sept. 1997 | US FDA (Centre for Drug Eval.& Res./Off. Testing & Res.) Sept. 1997 |

## Model Applicability

Unknown features are fingerprint features in the query molecule, but not found or appearing too infrequently in the training set.

1. All properties and OPS components are within expected ranges.

## Feature Contribution

### Top features for positive contribution

| Fingerprint | Bit/Smiles  | Feature Structure                                            | Score | Carcinogen in training set |
|-------------|-------------|--------------------------------------------------------------|-------|----------------------------|
| SCFP_6      | -1380909229 | <br><chem>[*]N([*])[c]1:[cH]:[*]:[c]([*]):[cH]:[cH]:1</chem> | 0.287 | 17 out of 39               |

| SCFP_6                                 | 10          | 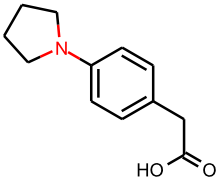<br><chem>[*]N([*])[*]</chem>                                          | 0.21   | 39 out of 98               |
|----------------------------------------|-------------|-----------------------------------------------------------------------------------------------------------------------------------------------------------|--------|----------------------------|
| SCFP_6                                 | -1009128698 | <br><chem>[*]C[c]1:[cH]:[cH]:[cH]:[cH]:[cH]:[cH]:1)N2C[*][[*]C2</chem> | 0.198  | 1 out of 2                 |
| Top Features for negative contribution |             |                                                                                                                                                           |        |                            |
| Fingerprint                            | Bit/Smiles  | Feature Structure                                                                                                                                         | Score  | Carcinogen in training set |
| SCFP_6                                 | -2056996303 | <br><chem>[*]N1CCCC1</chem>                                            | -0.825 | 0 out of 4                 |
| SCFP_6                                 | -1576616475 | <br><chem>[*]:[c](:[*])CC(=O)O</chem>                                 | -0.674 | 0 out of 3                 |
| SCFP_6                                 | -1476721585 | <br><chem>[*]:[cH]:[c]([C](=O)O):[cH]:[*]</chem>                     | -0.674 | 0 out of 3                 |

AND Enantiomer

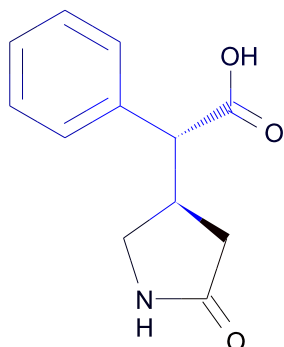C<sub>12</sub>H<sub>13</sub>NO<sub>3</sub>

Molecular Weight: 219.237

ALogP: 0.621

Rotatable Bonds: 3

Acceptors: 3

Donors: 2

## Model Prediction

Prediction: Non-Carcinogen

Probability: 0.217

Enrichment: 0.65

Bayesian Score: -6.22

Mahalanobis Distance: 13

Mahalanobis Distance p-value: 0.00168

Prediction: Positive if the Bayesian score is above the estimated best cutoff value from minimizing the false positive and false negative rate.

Probability: The estimated probability that the sample is in the positive category. This assumes that the Bayesian score follows a normal distribution and is different from the prediction using a cutoff.

Enrichment: An estimate of enrichment, that is, the increased likelihood (versus random) of this sample being in the category.

Bayesian Score: The standard Laplacian-modified Bayesian score.

Mahalanobis Distance: The Mahalanobis distance (MD) is the distance to the center of the training data. The larger the MD, the less trustworthy the prediction.

Mahalanobis Distance p-value: The p-value gives the fraction of training data with an MD greater than or equal to the one for the given sample, assuming normally distributed data. The smaller the p-value, the less trustworthy the prediction. For highly non-normal X properties (e.g., fingerprints), the MD p-value is wildly inaccurate.

## Structural Similar Compounds

| Name               | Phenobarbital                                                       | Aminogluthethimide                                                  | Tocainide                                                           |
|--------------------|---------------------------------------------------------------------|---------------------------------------------------------------------|---------------------------------------------------------------------|
| Structure          |                                                                     |                                                                     |                                                                     |
| Actual Endpoint    | Carcinogen                                                          | Carcinogen                                                          | Non-Carcinogen                                                      |
| Predicted Endpoint | Carcinogen                                                          | Carcinogen                                                          | Carcinogen                                                          |
| Distance           | 0.470                                                               | 0.502                                                               | 0.559                                                               |
| Reference          | US FDA (Centre for Drug Eval.& Res./Off. Testing & Res.) Sept. 1997 | US FDA (Centre for Drug Eval.& Res./Off. Testing & Res.) Sept. 1997 | US FDA (Centre for Drug Eval.& Res./Off. Testing & Res.) Sept. 1997 |

## Model Applicability

Unknown features are fingerprint features in the query molecule, but not found or appearing too infrequently in the training set.

1. All properties and OPS components are within expected ranges.

## Feature Contribution

### Top features for positive contribution

| Fingerprint | Bit/Smiles  | Feature Structure                   | Score | Carcinogen in training set |
|-------------|-------------|-------------------------------------|-------|----------------------------|
| SCFP_6      | -1272768868 | <br><chem>[*]C([*])CC(=O)[*]</chem> | 0.242 | 26 out of 63               |

|                                        |             |                                                                                                                                                       |        |                            |
|----------------------------------------|-------------|-------------------------------------------------------------------------------------------------------------------------------------------------------|--------|----------------------------|
| SCFP_6                                 | 13          | <p>AND Enantiomer</p> 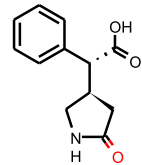 <p>[*]=O</p>                                | 0.0717 | 90 out of 261              |
| Top Features for negative contribution |             |                                                                                                                                                       |        |                            |
| Fingerprint                            | Bit/Smiles  | Feature Structure                                                                                                                                     | Score  | Carcinogen in training set |
| SCFP_6                                 | 699559848   | <p>AND Enantiomer</p>  <p>[*]C([*])(C@@H)(C(=O)N)C1=CC=CC=C1</p>   | -1.44  | 0 out of 10                |
| SCFP_6                                 | -1214451192 | <p>AND Enantiomer</p>  <p>[*]C([*])(C@@H)(C(=O)N)C1=CC=CC=C1</p>   | -1.27  | 0 out of 8                 |
| SCFP_6                                 | 413428563   | <p>AND Enantiomer</p>  <p>[*]C([*])(C@@H)(C(=O)N)C1=CC=CC=C1</p> | -0.957 | 0 out of 5                 |

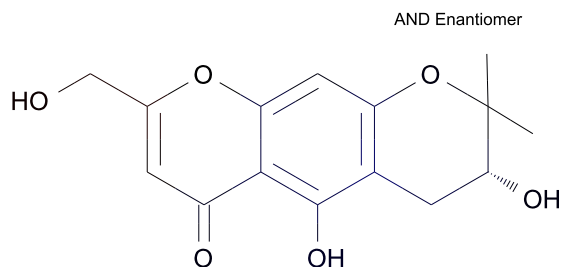

$C_{15}H_{16}O_6$

Molecular Weight: 292.284

ALogP: 0.901

Rotatable Bonds: 1

Acceptors: 6

Donors: 3

## Model Prediction

Prediction: Non-Carcinogen

Probability: 0.285

Enrichment: 0.853

Bayesian Score: -2.75

Mahalanobis Distance: 12.8

Mahalanobis Distance p-value: 0.00267

Prediction: Positive if the Bayesian score is above the estimated best cutoff value from minimizing the false positive and false negative rate.

Probability: The estimated probability that the sample is in the positive category. This assumes that the Bayesian score follows a normal distribution and is different from the prediction using a cutoff.

Enrichment: An estimate of enrichment, that is, the increased likelihood (versus random) of this sample being in the category.

Bayesian Score: The standard Laplacian-modified Bayesian score.

Mahalanobis Distance: The Mahalanobis distance (MD) is the distance to the center of the training data. The larger the MD, the less trustworthy the prediction.

Mahalanobis Distance p-value: The p-value gives the fraction of training data with an MD greater than or equal to the one for the given sample, assuming normally distributed data. The smaller the p-value, the less trustworthy the prediction. For highly non-normal X properties (e.g., fingerprints), the MD p-value is wildly inaccurate.

## Structural Similar Compounds

| Name               | Hydrocortisone                                                      | Piroxicam                                                           | Monocrotaline                                                       |
|--------------------|---------------------------------------------------------------------|---------------------------------------------------------------------|---------------------------------------------------------------------|
| Structure          |                                                                     |                                                                     |                                                                     |
| Actual Endpoint    | Non-Carcinogen                                                      | Non-Carcinogen                                                      | Carcinogen                                                          |
| Predicted Endpoint | Non-Carcinogen                                                      | Non-Carcinogen                                                      | Carcinogen                                                          |
| Distance           | 0.645                                                               | 0.652                                                               | 0.659                                                               |
| Reference          | US FDA (Centre for Drug Eval.& Res./Off. Testing & Res.) Sept. 1997 | US FDA (Centre for Drug Eval.& Res./Off. Testing & Res.) Sept. 1997 | US FDA (Centre for Drug Eval.& Res./Off. Testing & Res.) Sept. 1997 |

## Model Applicability

Unknown features are fingerprint features in the query molecule, but not found or appearing too infrequently in the training set.

1. All properties and OPS components are within expected ranges.

## Feature Contribution

### Top features for positive contribution

| Fingerprint | Bit/Smiles  | Feature Structure                                               | Score | Carcinogen in training set |
|-------------|-------------|-----------------------------------------------------------------|-------|----------------------------|
| SCFP_6      | -1971196727 | <p>AND Enantiomer</p> <p><chem>[*]C(=CC(=[*])[*])[*]</chem></p> | 0.361 | 17 out of 36               |

| SCFP_6                                 | -711656408  | <p>AND Enantiomer</p> 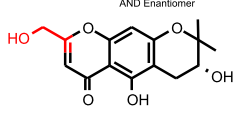 <p>[*]C(=[*])CO</p>                                                   | 0.266  | 7 out of 16                |
|----------------------------------------|-------------|---------------------------------------------------------------------------------------------------------------------------------------------------------------------------------|--------|----------------------------|
| SCFP_6                                 | 1416196903  | <p>AND Enantiomer</p>  <p>[*]OC(C)(C)C([*])[*]</p>                                           | 0.213  | 5 out of 12                |
| Top Features for negative contribution |             |                                                                                                                                                                                 |        |                            |
| Fingerprint                            | Bit/Smiles  | Feature Structure                                                                                                                                                               | Score  | Carcinogen in training set |
| SCFP_6                                 | -1681833008 | <p>AND Enantiomer</p>  <p>[*]C[c]1:[c]([*]):[*]<br/>:[c]([*]):[c](C=[*]<br/>)[*]):[c]:1O</p> | -0.496 | 0 out of 2                 |
| SCFP_6                                 | -1272709286 | <p>AND Enantiomer</p>  <p>[*]CC[c](:[*]):[*]</p>                                           | -0.459 | 12 out of 61               |
| SCFP_6                                 | -617610981  | <p>AND Enantiomer</p>  <p>[*][c](:[*]):[c]1C(=O<br/>)C=C([*])[*][c]:1:[*]<br/>]</p>        | -0.278 | 0 out of 1                 |

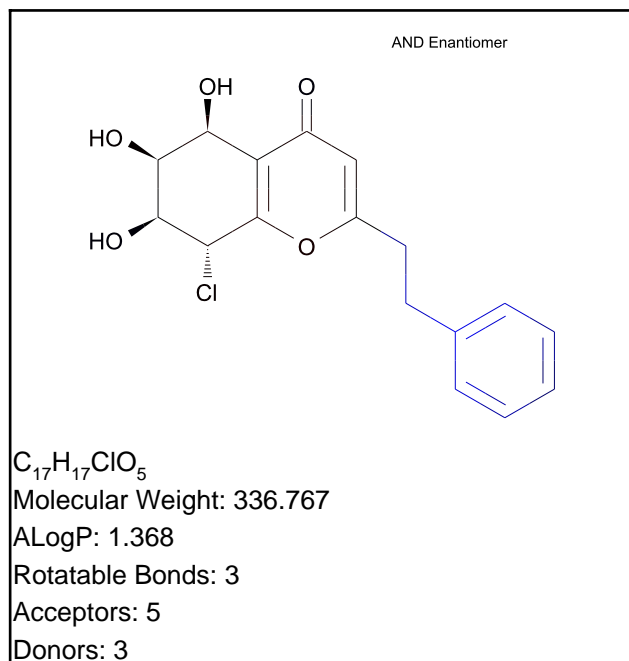

## Model Prediction

Prediction: Non-Carcinogen

Probability: 0.258

Enrichment: 0.772

Bayesian Score: -4

Mahalanobis Distance: 13.5

Mahalanobis Distance p-value: 0.000308

Prediction: Positive if the Bayesian score is above the estimated best cutoff value from minimizing the false positive and false negative rate.

Probability: The estimated probability that the sample is in the positive category. This assumes that the Bayesian score follows a normal distribution and is different from the prediction using a cutoff.

Enrichment: An estimate of enrichment, that is, the increased likelihood (versus random) of this sample being in the category.

Bayesian Score: The standard Laplacian-modified Bayesian score.

Mahalanobis Distance: The Mahalanobis distance (MD) is the distance to the center of the training data. The larger the MD, the less trustworthy the prediction.

Mahalanobis Distance p-value: The p-value gives the fraction of training data with an MD greater than or equal to the one for the given sample, assuming normally distributed data. The smaller the p-value, the less trustworthy the prediction. For highly non-normal X properties (e.g., fingerprints), the MD p-value is wildly inaccurate.

## Structural Similar Compounds

| Name               | Hydrocortisone                                                                      | Beclomethasone                                                                      | Naltrexone                                                                          |
|--------------------|-------------------------------------------------------------------------------------|-------------------------------------------------------------------------------------|-------------------------------------------------------------------------------------|
| Structure          | 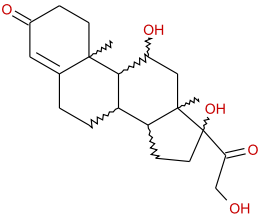 |  |  |
| Actual Endpoint    | Non-Carcinogen                                                                      | Non-Carcinogen                                                                      | Non-Carcinogen                                                                      |
| Predicted Endpoint | Non-Carcinogen                                                                      | Non-Carcinogen                                                                      | Non-Carcinogen                                                                      |
| Distance           | 0.538                                                                               | 0.605                                                                               | 0.606                                                                               |
| Reference          | US FDA (Centre for Drug Eval.& Res./Off. Testing & Res.) Sept. 1997                 | US FDA (Centre for Drug Eval.& Res./Off. Testing & Res.) Sept. 1997                 | US FDA (Centre for Drug Eval.& Res./Off. Testing & Res.) Sept. 1997                 |

## Model Applicability

Unknown features are fingerprint features in the query molecule, but not found or appearing too infrequently in the training set.

- OPS PC29 out of range. Value: -4.1695. Training min, max, SD, explained variance: -3.1746, 3.7825, 1.007, 0.0095.

## Feature Contribution

### Top features for positive contribution

| Fingerprint | Bit/Smiles  | Feature Structure                                                                                                          | Score | Carcinogen in training set |
|-------------|-------------|----------------------------------------------------------------------------------------------------------------------------|-------|----------------------------|
| SCFP_6      | -1971196727 | 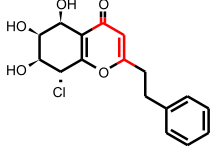<br><chem>*]C(=CC(=[*])[*])[*]</chem> | 0.361 | 17 out of 36               |





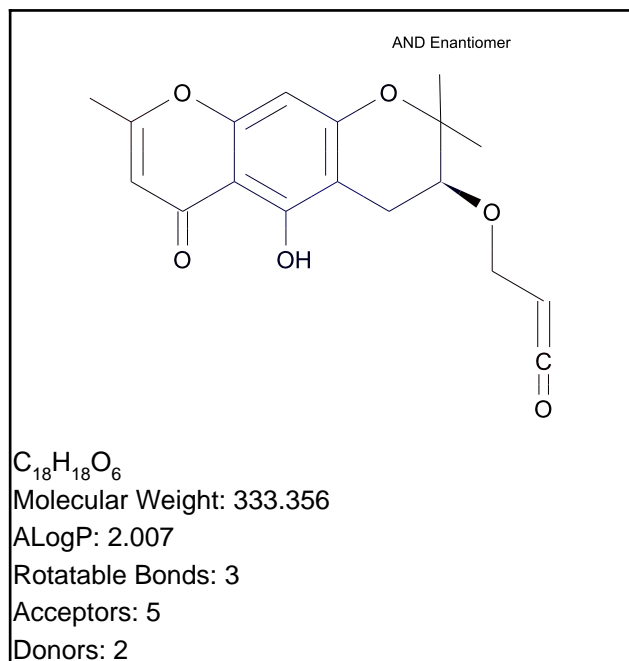

## Model Prediction

Prediction: Non-Carcinogen

Probability: 0.307

Enrichment: 0.919

Bayesian Score: -1.83

Mahalanobis Distance: 16.5

Mahalanobis Distance p-value: 4.92e-010

Prediction: Positive if the Bayesian score is above the estimated best cutoff value from minimizing the false positive and false negative rate.

Probability: The estimated probability that the sample is in the positive category. This assumes that the Bayesian score follows a normal distribution and is different from the prediction using a cutoff.

Enrichment: An estimate of enrichment, that is, the increased likelihood (versus random) of this sample being in the category.

Bayesian Score: The standard Laplacian-modified Bayesian score.

Mahalanobis Distance: The Mahalanobis distance (MD) is the distance to the center of the training data. The larger the MD, the less trustworthy the prediction.

Mahalanobis Distance p-value: The p-value gives the fraction of training data with an MD greater than or equal to the one for the given sample, assuming normally distributed data. The smaller the p-value, the less trustworthy the prediction. For highly non-normal X properties (e.g., fingerprints), the MD p-value is wildly inaccurate.

## Structural Similar Compounds

| Name               | Naltrexone                                                                          | Tolazamide                                                                          | Indapamide                                                                          |
|--------------------|-------------------------------------------------------------------------------------|-------------------------------------------------------------------------------------|-------------------------------------------------------------------------------------|
| Structure          | 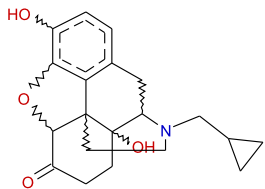 |  |  |
| Actual Endpoint    | Non-Carcinogen                                                                      | Non-Carcinogen                                                                      | Non-Carcinogen                                                                      |
| Predicted Endpoint | Non-Carcinogen                                                                      | Non-Carcinogen                                                                      | Non-Carcinogen                                                                      |
| Distance           | 0.526                                                                               | 0.562                                                                               | 0.585                                                                               |
| Reference          | US FDA (Centre for Drug Eval.& Res./Off. Testing & Res.) Sept. 1997                 | US FDA (Centre for Drug Eval.& Res./Off. Testing & Res.) Sept. 1997                 | US FDA (Centre for Drug Eval.& Res./Off. Testing & Res.) Sept. 1997                 |

## Model Applicability

Unknown features are fingerprint features in the query molecule, but not found or appearing too infrequently in the training set.

1. All properties and OPS components are within expected ranges.

## Feature Contribution

### Top features for positive contribution

| Fingerprint | Bit/Smiles  | Feature Structure                                                                                                                                                      | Score | Carcinogen in training set |
|-------------|-------------|------------------------------------------------------------------------------------------------------------------------------------------------------------------------|-------|----------------------------|
| SCFP_6      | -1971196727 | <p style="text-align: center;">AND Enantiomer</p> 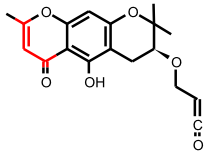 <p>[*]C(=CC(=[*])([*])[*])</p> | 0.361 | 17 out of 36               |

| SCFP_6                                 | -711656408  | <p>AND Enantiomer</p> 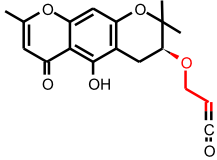 <p>[*]C(=[*])CO</p>                                          | 0.266  | 7 out of 16                |
|----------------------------------------|-------------|------------------------------------------------------------------------------------------------------------------------------------------------------------------------|--------|----------------------------|
| SCFP_6                                 | 2           | <p>AND Enantiomer</p>  <p>[*]=C=[*]</p>                                             | 0.238  | 8 out of 19                |
| Top Features for negative contribution |             |                                                                                                                                                                        |        |                            |
| Fingerprint                            | Bit/Smiles  | Feature Structure                                                                                                                                                      | Score  | Carcinogen in training set |
| SCFP_6                                 | -1681833008 | <p>AND Enantiomer</p>  <p>[*]C[c]1:[c]([*]):[*]:[c]([*]):[c](C(=[*])[*]):[c]:1O</p> | -0.496 | 0 out of 2                 |
| SCFP_6                                 | -1272709286 | <p>AND Enantiomer</p>  <p>[*]CC[c](:[*]):[*]</p>                                   | -0.459 | 12 out of 61               |
| SCFP_6                                 | -1849894309 | <p>AND Enantiomer</p>  <p>[*][c](:[*]):[c]1C[C@H](O)C([*])([*])[c]:1:[*]</p>      | -0.278 | 0 out of 1                 |

AND Enantiomer

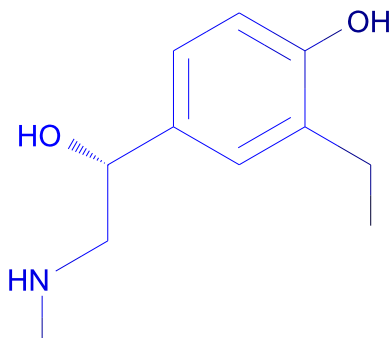C<sub>11</sub>H<sub>17</sub>NO<sub>2</sub>

Molecular Weight: 195.258

ALogP: 1.557

Rotatable Bonds: 4

Acceptors: 3

Donors: 3

## Model Prediction

Prediction: Non-Carcinogen

Probability: 0.145

Enrichment: 0.434

Bayesian Score: -11.5

Mahalanobis Distance: 10.3

Mahalanobis Distance p-value: 0.515

Prediction: Positive if the Bayesian score is above the estimated best cutoff value from minimizing the false positive and false negative rate.

Probability: The estimated probability that the sample is in the positive category. This assumes that the Bayesian score follows a normal distribution and is different from the prediction using a cutoff.

Enrichment: An estimate of enrichment, that is, the increased likelihood (versus random) of this sample being in the category.

Bayesian Score: The standard Laplacian-modified Bayesian score.

Mahalanobis Distance: The Mahalanobis distance (MD) is the distance to the center of the training data. The larger the MD, the less trustworthy the prediction.

Mahalanobis Distance p-value: The p-value gives the fraction of training data with an MD greater than or equal to the one for the given sample, assuming normally distributed data. The smaller the p-value, the less trustworthy the prediction. For highly non-normal X properties (e.g., fingerprints), the MD p-value is wildly inaccurate.

## Structural Similar Compounds

| Name               | Phenylephrine                                                       | Terbutaline                                                         | Metaproterenol                                                      |
|--------------------|---------------------------------------------------------------------|---------------------------------------------------------------------|---------------------------------------------------------------------|
| Structure          |                                                                     |                                                                     |                                                                     |
| Actual Endpoint    | Non-Carcinogen                                                      | Non-Carcinogen                                                      | Non-Carcinogen                                                      |
| Predicted Endpoint | Non-Carcinogen                                                      | Non-Carcinogen                                                      | Non-Carcinogen                                                      |
| Distance           | 0.377                                                               | 0.495                                                               | 0.510                                                               |
| Reference          | US FDA (Centre for Drug Eval.& Res./Off. Testing & Res.) Sept. 1997 | US FDA (Centre for Drug Eval.& Res./Off. Testing & Res.) Sept. 1997 | US FDA (Centre for Drug Eval.& Res./Off. Testing & Res.) Sept. 1997 |

## Model Applicability

Unknown features are fingerprint features in the query molecule, but not found or appearing too infrequently in the training set.

1. All properties and OPS components are within expected ranges.

## Feature Contribution

### Top Features for negative contribution

| Fingerprint | Bit/Smiles | Feature Structure                                      | Score | Carcinogen in training set |
|-------------|------------|--------------------------------------------------------|-------|----------------------------|
| SCFP_6      | 1702724181 | <p>AND Enantiomer</p> <p>[*]C([*])[C@H](O)[C@H](*)</p> | -1.22 | 1 out of 18                |

|        |            |                                                                                                                                             |       |             |
|--------|------------|---------------------------------------------------------------------------------------------------------------------------------------------|-------|-------------|
| SCFP_6 | 1578545183 | <div>AND Enantiomer</div> <div><chem>[*]C[C@H](O)[c]1:[cH]:[cH]:[cH](O):[c]([*])</chem><br/><chem>);[cH]:1</chem></div>                     | -1.07 | 0 out of 6  |
| SCFP_6 | -561151481 | <div>AND Enantiomer</div> <div><chem>[*]C([*])[C@H](O)[c]1</chem><br/><chem>:[cH]:[cH]:[cH]:[cH]:[cH]:</chem><br/><chem>[cH]:1</chem></div> | -1.07 | 1 out of 15 |

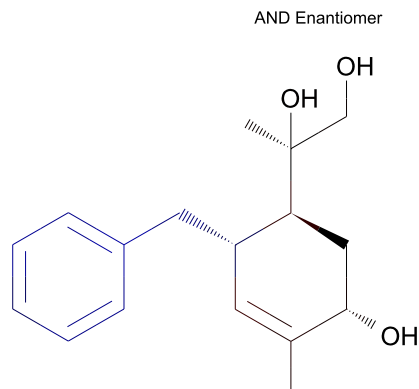

$C_{17}H_{24}O_3$

Molecular Weight: 276.371

ALogP: 2.165

Rotatable Bonds: 4

Acceptors: 3

Donors: 3

## Model Prediction

Prediction: Non-Carcinogen

Probability: 0.291

Enrichment: 0.872

Bayesian Score: -2.48

Mahalanobis Distance: 15.3

Mahalanobis Distance p-value: 1.51e-007

Prediction: Positive if the Bayesian score is above the estimated best cutoff value from minimizing the false positive and false negative rate.

Probability: The estimated probability that the sample is in the positive category. This assumes that the Bayesian score follows a normal distribution and is different from the prediction using a cutoff.

Enrichment: An estimate of enrichment, that is, the increased likelihood (versus random) of this sample being in the category.

Bayesian Score: The standard Laplacian-modified Bayesian score.

Mahalanobis Distance: The Mahalanobis distance (MD) is the distance to the center of the training data. The larger the MD, the less trustworthy the prediction.

Mahalanobis Distance p-value: The p-value gives the fraction of training data with an MD greater than or equal to the one for the given sample, assuming normally distributed data. The smaller the p-value, the less trustworthy the prediction. For highly non-normal X properties (e.g., fingerprints), the MD p-value is wildly inaccurate.

## Structural Similar Compounds

| Name               | Pindolol                                                            | Carteolol                                                           | Procarbazine                                                        |
|--------------------|---------------------------------------------------------------------|---------------------------------------------------------------------|---------------------------------------------------------------------|
| Structure          |                                                                     |                                                                     |                                                                     |
| Actual Endpoint    | Non-Carcinogen                                                      | Non-Carcinogen                                                      | Carcinogen                                                          |
| Predicted Endpoint | Non-Carcinogen                                                      | Non-Carcinogen                                                      | Carcinogen                                                          |
| Distance           | 0.585                                                               | 0.611                                                               | 0.627                                                               |
| Reference          | US FDA (Centre for Drug Eval.& Res./Off. Testing & Res.) Sept. 1997 | US FDA (Centre for Drug Eval.& Res./Off. Testing & Res.) Sept. 1997 | US FDA (Centre for Drug Eval.& Res./Off. Testing & Res.) Sept. 1997 |

## Model Applicability

Unknown features are fingerprint features in the query molecule, but not found or appearing too infrequently in the training set.

- OPS PC29 out of range. Value: -3.8031. Training min, max, SD, explained variance: -3.1746, 3.7825, 1.007, 0.0095.

## Feature Contribution

### Top features for positive contribution

| Fingerprint | Bit/Smiles  | Feature Structure                                                                  | Score | Carcinogen in training set |
|-------------|-------------|------------------------------------------------------------------------------------|-------|----------------------------|
| SCFP_6      | -1848330701 | <p>AND Enantiomer</p> <p>[*]C([*])[C@@H](C)[C@H](O)[C@H](O)[C@H](O)[C@H](O)C=O</p> | 0.415 | 1 out of 1                 |

| SCFP_6                                 | 55434585    | <p>AND Enantiomer</p> 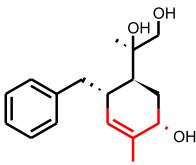 <p>[*]C=C(\C)/C([*])([*])</p>                 | 0.331  | 12 out of 26               |
|----------------------------------------|-------------|---------------------------------------------------------------------------------------------------------------------------------------------------------|--------|----------------------------|
| SCFP_6                                 | -1043310069 | <p>AND Enantiomer</p>  <p>[*]C[C@@H](C=[*])C([*])</p>                | 0.296  | 15 out of 34               |
| Top Features for negative contribution |             |                                                                                                                                                         |        |                            |
| Fingerprint                            | Bit/Smiles  | Feature Structure                                                                                                                                       | Score  | Carcinogen in training set |
| SCFP_6                                 | -1211866396 | <p>AND Enantiomer</p>  <p>[*]CC[c]1:[cH]:[cH]:[*]:[cH]:[cH]:1</p>    | -1.1   | 2 out of 25                |
| SCFP_6                                 | -1640858361 | <p>AND Enantiomer</p>  <p>[*]CC[c]1:[cH]:[cH]:[cH]:[cH]:[cH]:1</p> | -0.817 | 1 out of 11                |
| SCFP_6                                 | 1653911926  | <p>AND Enantiomer</p>  <p>[*][c]1:[cH]:[cH]:[cH]:[cH]:[cH]:1</p>   | -0.504 | 12 out of 64               |

# Simeprevir

# TOPKAT\_Rat\_Male\_FDA\_None\_vs\_Carcinogen

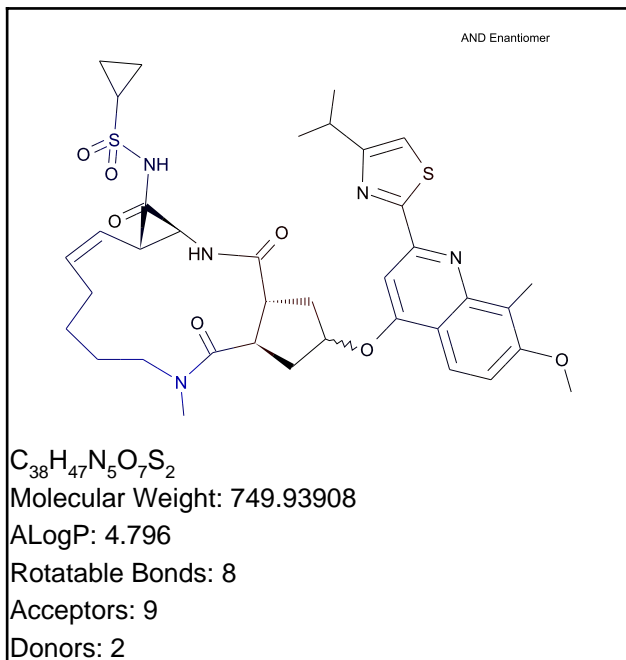

## Model Prediction

Prediction: Non-Carcinogen

Probability: 0.231

Enrichment: 0.69

Bayesian Score: -5.43

Mahalanobis Distance: 20.3

Mahalanobis Distance p-value: 1.2e-019

Prediction: Positive if the Bayesian score is above the estimated best cutoff value from minimizing the false positive and false negative rate.

Probability: The estimated probability that the sample is in the positive category. This assumes that the Bayesian score follows a normal distribution and is different from the prediction using a cutoff.

Enrichment: An estimate of enrichment, that is, the increased likelihood (versus random) of this sample being in the category.

Bayesian Score: The standard Laplacian-modified Bayesian score.

Mahalanobis Distance: The Mahalanobis distance (MD) is the distance to the center of the training data. The larger the MD, the less trustworthy the prediction.

Mahalanobis Distance p-value: The p-value gives the fraction of training data with an MD greater than or equal to the one for the given sample, assuming normally distributed data. The smaller the p-value, the less trustworthy the prediction. For highly non-normal X properties (e.g., fingerprints), the MD p-value is wildly inaccurate.

## Structural Similar Compounds

| Name               | Reserpine                                                                           | Deserpidine                                                                         | Bromocriptine                                                                       |
|--------------------|-------------------------------------------------------------------------------------|-------------------------------------------------------------------------------------|-------------------------------------------------------------------------------------|
| Structure          | 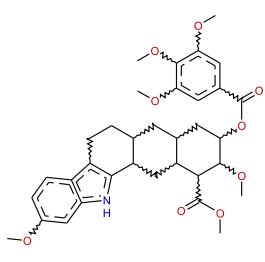 |  |  |
| Actual Endpoint    | Carcinogen                                                                          | Carcinogen                                                                          | Non-Carcinogen                                                                      |
| Predicted Endpoint | Carcinogen                                                                          | Carcinogen                                                                          | Non-Carcinogen                                                                      |
| Distance           | 0.771                                                                               | 0.812                                                                               | 0.842                                                                               |
| Reference          | US FDA (Centre for Drug Eval.& Res./Off. Testing & Res.) Sept. 1997                 | US FDA (Centre for Drug Eval.& Res./Off. Testing & Res.) Sept. 1997                 | US FDA (Centre for Drug Eval.& Res./Off. Testing & Res.) Sept. 1997                 |

## Model Applicability

Unknown features are fingerprint features in the query molecule, but not found or appearing too infrequently in the training set.

- OPS PC5 out of range. Value: 7.7766. Training min, max, SD, explained variance: -4.0702, 6.5927, 2.146, 0.0429.
- OPS PC22 out of range. Value: 3.5288. Training min, max, SD, explained variance: -3.2994, 3.2573, 1.197, 0.0134.

## Feature Contribution

### Top features for positive contribution

| Fingerprint | Bit/Smiles  | Feature Structure                                                                                                                                          | Score | Carcinogen in training set |
|-------------|-------------|------------------------------------------------------------------------------------------------------------------------------------------------------------|-------|----------------------------|
| SCFP_6      | -1903488337 | 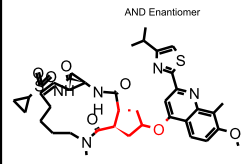<br>AND Enantiomer<br><chem>[*]OC1C(C@@H)([*])C@H1(C1)C(=O)[*]</chem> | 0.603 | 2 out of 2                 |

|                                        |             |                                                                                                                                                                                |        |                            |
|----------------------------------------|-------------|--------------------------------------------------------------------------------------------------------------------------------------------------------------------------------|--------|----------------------------|
| SCFP_6                                 | -1379673609 | <p>AND Enantiomer</p> 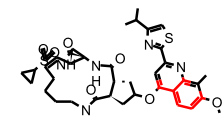 <p>[*][c](:[*]):[c]1:[cH]<br/>]:[cH]:[c]([*]):[*]:<br/>[c]:1:[*]</p> | 0.526  | 11 out of 19               |
| SCFP_6                                 | 1310748454  | <p>AND Enantiomer</p>  <p>[*][c]1:[*]:[*]:[cH]:<br/>s:1</p>                                 | 0.437  | 7 out of 13                |
| Top Features for negative contribution |             |                                                                                                                                                                                |        |                            |
| Fingerprint                            | Bit/Smiles  | Feature Structure                                                                                                                                                              | Score  | Carcinogen in training set |
| SCFP_6                                 | 182902497   | <p>AND Enantiomer</p>  <p>[*]NS(=O)(=O)C1[*][*]<br/>1</p>                                   | -0.825 | 0 out of 4                 |
| SCFP_6                                 | 306578635   | <p>AND Enantiomer</p>  <p>[*]CCCN(C)C(=[*])[*]</p>                                        | -0.825 | 0 out of 4                 |
| SCFP_6                                 | 1260369147  | <p>AND Enantiomer</p>  <p>[*]CCC\C=C/[*]</p>                                              | -0.674 | 0 out of 3                 |



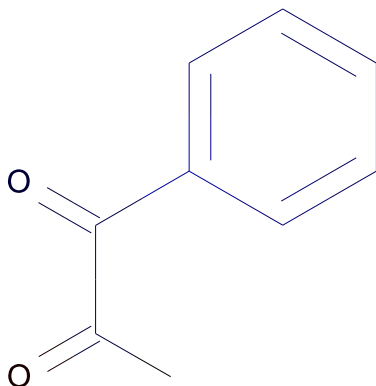C<sub>9</sub>H<sub>8</sub>O<sub>2</sub>

Molecular Weight: 148.159

ALogP: 1.446

Rotatable Bonds: 2

Acceptors: 2

Donors: 0

## Model Prediction

Prediction: Single-Carcinogen

Probability: 0.537

Enrichment: 1.3

Bayesian Score: -1.89

Mahalanobis Distance: 12.5

Mahalanobis Distance p-value: 0.00179

Prediction: Positive if the Bayesian score is above the estimated best cutoff value from minimizing the false positive and false negative rate.

Probability: The estimated probability that the sample is in the positive category. This assumes that the Bayesian score follows a normal distribution and is different from the prediction using a cutoff.

Enrichment: An estimate of enrichment, that is, the increased likelihood (versus random) of this sample being in the category.

Bayesian Score: The standard Laplacian-modified Bayesian score.

Mahalanobis Distance: The Mahalanobis distance (MD) is the distance to the center of the training data. The larger the MD, the less trustworthy the prediction.

Mahalanobis Distance p-value: The p-value gives the fraction of training data with an MD greater than or equal to the one for the given sample, assuming normally distributed data. The smaller the p-value, the less trustworthy the prediction. For highly non-normal X properties (e.g., fingerprints), the MD p-value is wildly inaccurate.

## Structural Similar Compounds

| Name               | Coumarin                                                            | Antipyrine                                                          | Phenacetin                                                          |
|--------------------|---------------------------------------------------------------------|---------------------------------------------------------------------|---------------------------------------------------------------------|
| Structure          |                                                                     |                                                                     |                                                                     |
| Actual Endpoint    | Multiple-Carcinogen                                                 | Single-Carcinogen                                                   | Multiple-Carcinogen                                                 |
| Predicted Endpoint | Multiple-Carcinogen                                                 | Single-Carcinogen                                                   | Multiple-Carcinogen                                                 |
| Distance           | 0.534                                                               | 0.548                                                               | 0.631                                                               |
| Reference          | US FDA (Centre for Drug Eval.& Res./Off. Testing & Res.) Sept. 1997 | US FDA (Centre for Drug Eval.& Res./Off. Testing & Res.) Sept. 1997 | US FDA (Centre for Drug Eval.& Res./Off. Testing & Res.) Sept. 1997 |

## Model Applicability

Unknown features are fingerprint features in the query molecule, but not found or appearing too infrequently in the training set.

1. All properties and OPS components are within expected ranges.

## Feature Contribution

### Top features for positive contribution

| Fingerprint | Bit/Smiles | Feature Structure                 | Score | Multiple-Carcinogen in training set |
|-------------|------------|-----------------------------------|-------|-------------------------------------|
| SCFP_8      | 571795252  | <br><chem>[*]C(=[*])C(=O)C</chem> | 0.201 | 2 out of 4                          |

|                                        |             |                                                                                                                                        |        |                                     |
|----------------------------------------|-------------|----------------------------------------------------------------------------------------------------------------------------------------|--------|-------------------------------------|
| SCFP_8                                 | 13          | 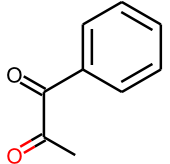<br><chem>[*]=O</chem>                              | 0.172  | 39 out of 90                        |
| SCFP_8                                 | 1           | <br><chem>[*]C(=[*])[*]</chem>                      | 0.146  | 38 out of 90                        |
| Top Features for negative contribution |             |                                                                                                                                        |        |                                     |
| Fingerprint                            | Bit/Smiles  | Feature Structure                                                                                                                      | Score  | Multiple-Carcinogen in training set |
| SCFP_8                                 | 1653911926  | <br><chem>[*][c]1:[cH]:[cH]:[cH]:[cH]:[cH]:1</chem> | -0.985 | 1 out of 12                         |
| SCFP_8                                 | -1980302127 | <br><chem>[*]C(=[*])C(=O)[c]([*]):[*]</chem>      | -0.737 | 0 out of 3                          |
| SCFP_8                                 | 136627117   | <br><chem>[*]C(=[*])C</chem>                      | -0.41  | 4 out of 18                         |



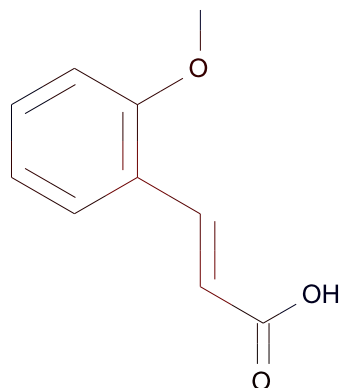C<sub>10</sub>H<sub>10</sub>O<sub>3</sub>

Molecular Weight: 178.185

ALogP: 1.911

Rotatable Bonds: 3

Acceptors: 3

Donors: 1

## Model Prediction

Prediction: Single-Carcinogen

Probability: 0.567

Enrichment: 1.37

Bayesian Score: 0.517

Mahalanobis Distance: 15.9

Mahalanobis Distance p-value: 1.61e-006

Prediction: Positive if the Bayesian score is above the estimated best cutoff value from minimizing the false positive and false negative rate.

Probability: The estimated probability that the sample is in the positive category. This assumes that the Bayesian score follows a normal distribution and is different from the prediction using a cutoff.

Enrichment: An estimate of enrichment, that is, the increased likelihood (versus random) of this sample being in the category.

Bayesian Score: The standard Laplacian-modified Bayesian score.

Mahalanobis Distance: The Mahalanobis distance (MD) is the distance to the center of the training data. The larger the MD, the less trustworthy the prediction.

Mahalanobis Distance p-value: The p-value gives the fraction of training data with an MD greater than or equal to the one for the given sample, assuming normally distributed data. The smaller the p-value, the less trustworthy the prediction. For highly non-normal X properties (e.g., fingerprints), the MD p-value is wildly inaccurate.

## Structural Similar Compounds

| Name               | Phenacetin                                                          | Coumarin                                                            | Cytembena                                                           |
|--------------------|---------------------------------------------------------------------|---------------------------------------------------------------------|---------------------------------------------------------------------|
| Structure          |                                                                     |                                                                     |                                                                     |
| Actual Endpoint    | Multiple-Carcinogen                                                 | Multiple-Carcinogen                                                 | Single-Carcinogen                                                   |
| Predicted Endpoint | Multiple-Carcinogen                                                 | Multiple-Carcinogen                                                 | Single-Carcinogen                                                   |
| Distance           | 0.542                                                               | 0.553                                                               | 0.564                                                               |
| Reference          | US FDA (Centre for Drug Eval.& Res./Off. Testing & Res.) Sept. 1997 | US FDA (Centre for Drug Eval.& Res./Off. Testing & Res.) Sept. 1997 | US FDA (Centre for Drug Eval.& Res./Off. Testing & Res.) Sept. 1997 |

## Model Applicability

Unknown features are fingerprint features in the query molecule, but not found or appearing too infrequently in the training set.

1. All properties and OPS components are within expected ranges.

## Feature Contribution

### Top features for positive contribution

| Fingerprint | Bit/Smiles | Feature Structure                                   | Score | Multiple-Carcinogen in training set |
|-------------|------------|-----------------------------------------------------|-------|-------------------------------------|
| SCFP_8      | 1977229858 | <br><chem>[*]C(=[*])C=C[C@H](C(=O)O)c1ccccc1</chem> | 0.553 | 2 out of 2                          |

|                                        |            |                                                                                                                                               |        |                                     |
|----------------------------------------|------------|-----------------------------------------------------------------------------------------------------------------------------------------------|--------|-------------------------------------|
| SCFP_8                                 | 966282057  | 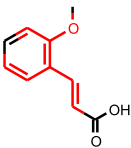 <chem>[*]O[c]1:[cH]:[*]:[cH]:[cH]:[c]:1\C=C[*]</chem>     | 0.553  | 2 out of 2                          |
| SCFP_8                                 | 2109620068 |  <chem>[*]O[c]1:[cH]:[*]:[cH]:[cH]:[c]:1\C=C\C(=O)O</chem> | 0.553  | 2 out of 2                          |
| Top Features for negative contribution |            |                                                                                                                                               |        |                                     |
| Fingerprint                            | Bit/Smiles | Feature Structure                                                                                                                             | Score  | Multiple-Carcinogen in training set |
| SCFP_8                                 | -424485343 |  <chem>[*]C(=[*])O</chem>                                  | -0.584 | 3 out of 17                         |
| SCFP_8                                 | 1132907712 |  <chem>[*]=CC(=O)O</chem>                                | -0.58  | 2 out of 12                         |
| SCFP_8                                 | 2034654200 |  <chem>[*]\C=C\C(=O)O</chem>                             | -0.546 | 0 out of 2                          |



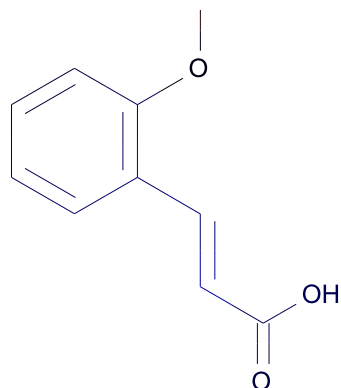

$C_{10}H_{10}O_3$

Molecular Weight: 178.185

ALogP: 1.911

Rotatable Bonds: 3

Acceptors: 3

Donors: 1

## Model Prediction

Prediction: Mild

Probability: 0.255

Enrichment: 0.693

Bayesian Score: -3.76

Mahalanobis Distance: 7.79

Mahalanobis Distance p-value: 0.859

Prediction: Positive if the Bayesian score is above the estimated best cutoff value from minimizing the false positive and false negative rate.

Probability: The estimated probability that the sample is in the positive category. This assumes that the Bayesian score follows a normal distribution and is different from the prediction using a cutoff.

Enrichment: An estimate of enrichment, that is, the increased likelihood (versus random) of this sample being in the category.

Bayesian Score: The standard Laplacian-modified Bayesian score.

Mahalanobis Distance: The Mahalanobis distance (MD) is the distance to the center of the training data. The larger the MD, the less trustworthy the prediction.

Mahalanobis Distance p-value: The p-value gives the fraction of training data with an MD greater than or equal to the one for the given sample, assuming normally distributed data. The smaller the p-value, the less trustworthy the prediction. For highly non-normal X properties (e.g., fingerprints), the MD p-value is wildly inaccurate.

## Structural Similar Compounds

| Name               | Cinnamic acid                                                                                                                                   | Salicylic acid, ethyl ester                                                                                                                     | Acetic acid, ((4-chloro-o-tolyl)oxy)-                                                                                                                                                          |
|--------------------|-------------------------------------------------------------------------------------------------------------------------------------------------|-------------------------------------------------------------------------------------------------------------------------------------------------|------------------------------------------------------------------------------------------------------------------------------------------------------------------------------------------------|
| Structure          |                                                                                                                                                 |                                                                                                                                                 |                                                                                                                                                                                                |
| Actual Endpoint    | Mild                                                                                                                                            | Moderate_Severe                                                                                                                                 | Mild                                                                                                                                                                                           |
| Predicted Endpoint | Mild                                                                                                                                            | Moderate_Severe                                                                                                                                 | Mild                                                                                                                                                                                           |
| Distance           | 0.390                                                                                                                                           | 0.438                                                                                                                                           | 0.447                                                                                                                                                                                          |
| Reference          | FCTXAV Food and Cosmetics Toxicology. (London, UK) V.1-19, 1963-81. For publisher information, see FCTOD7. Volume(issue)/page/year: 16,687,1978 | FCTXAV Food and Cosmetics Toxicology. (London, UK) V.1-19, 1963-81. For publisher information, see FCTOD7. Volume(issue)/page/year: 16,751,1978 | ATDAEI Acute Toxicity Data. Journal of the American College of Toxicology, Part B. (Mary Ann Liebert, Inc., 1651 Third Ave., New York, NY 10128) V.1- 1990- Volume(issue)/page/year: 1,85,1990 |

## Model Applicability

Unknown features are fingerprint features in the query molecule, but not found or appearing too infrequently in the training set.

1. All properties and OPS components are within expected ranges.

## Feature Contribution

### Top features for positive contribution

| Fingerprint | Bit/Smiles | Feature Structure | Score | Moderate_Severe in training set |
|-------------|------------|-------------------|-------|---------------------------------|
|-------------|------------|-------------------|-------|---------------------------------|

|                                        |             |                                                                                                                                                      |        |                                 |
|----------------------------------------|-------------|------------------------------------------------------------------------------------------------------------------------------------------------------|--------|---------------------------------|
| FCFP_12                                | 1458856986  | 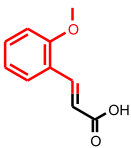<br><chem>[*]=C[c]1:[cH]:[cH]:[cH]:[cH]:[cH]:[c]:1OC</chem>       | 0.493  | 3 out of 4                      |
| FCFP_12                                | -1977641857 | <br><chem>[*][c](:[*]):[c](OC):[cH]:[*]</chem>                    | 0.416  | 18 out of 32                    |
| FCFP_12                                | 136627117   | <br><chem>[*]OC</chem>                                            | 0.361  | 47 out of 90                    |
| Top Features for negative contribution |             |                                                                                                                                                      |        |                                 |
| Fingerprint                            | Bit/Smiles  | Feature Structure                                                                                                                                    | Score  | Moderate_Severe in training set |
| FCFP_12                                | -395337223  | <br><chem>[*]O[c]1:[cH]:[*]:[cH]:[cH]:[c]:1C=C\[*]</chem>       | -0.733 | 0 out of 3                      |
| FCFP_12                                | -1996489595 | <br><chem>[*]C(=[*])C=C\[c]1:[cH]:[cH]:[cH]:[cH]:[c]:1OC</chem> | -0.543 | 0 out of 2                      |



|         |             |                                                                                                                   |        |            |
|---------|-------------|-------------------------------------------------------------------------------------------------------------------|--------|------------|
| FCFP_12 | -2107131107 | 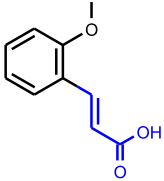<br><chem>[*]C=C\C(=O)O</chem> | -0.458 | 1 out of 6 |
|---------|-------------|-------------------------------------------------------------------------------------------------------------------|--------|------------|

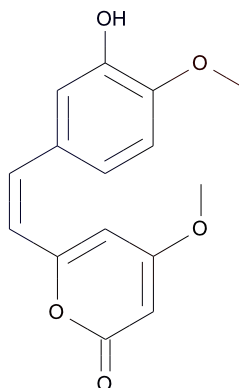

$C_{15}H_{14}O_5$

Molecular Weight: 274.269

ALogP: 1.969

Rotatable Bonds: 4

Acceptors: 5

Donors: 1

## Model Prediction

Prediction: Mild

Probability: 0.305

Enrichment: 0.828

Bayesian Score: -2.58

Mahalanobis Distance: 8.36

Mahalanobis Distance p-value: 0.612

Prediction: Positive if the Bayesian score is above the estimated best cutoff value from minimizing the false positive and false negative rate.

Probability: The estimated probability that the sample is in the positive category. This assumes that the Bayesian score follows a normal distribution and is different from the prediction using a cutoff.

Enrichment: An estimate of enrichment, that is, the increased likelihood (versus random) of this sample being in the category. Bayesian Score: The standard Laplacian-modified Bayesian score.

Mahalanobis Distance: The Mahalanobis distance (MD) is the distance to the center of the training data. The larger the MD, the less trustworthy the prediction.

Mahalanobis Distance p-value: The p-value gives the fraction of training data with an MD greater than or equal to the one for the given sample, assuming normally distributed data. The smaller the p-value, the less trustworthy the prediction. For highly non-normal X properties (e.g., fingerprints), the MD p-value is wildly inaccurate.

## Structural Similar Compounds

| Name               | Benzenesulfonic acid, 3-(diethylamino)-, sodium salt                                                                                               | 1-Valeryl-2-pipecoline | 1-Valeryl-3-pipecoline |
|--------------------|----------------------------------------------------------------------------------------------------------------------------------------------------|------------------------|------------------------|
| Structure          |                                                                                                                                                    |                        |                        |
| Actual Endpoint    | Mild                                                                                                                                               | Mild                   | Mild                   |
| Predicted Endpoint | Mild                                                                                                                                               | Mild                   | Mild                   |
| Distance           | 0.587                                                                                                                                              | 0.613                  | 0.622                  |
| Reference          | 85JCAE "Prehled Prumyslove Toxikologie; Organické Latky," Marhold, J., Prague, Czechoslovakia, Avicenum, 1986 Volume(issue)/page/year: -,1056,1986 | US ARMY                | US ARMY                |

## Model Applicability

Unknown features are fingerprint features in the query molecule, but not found or appearing too infrequently in the training set.

1. All properties and OPS components are within expected ranges.

## Feature Contribution

### Top features for positive contribution

| Fingerprint | Bit/Smiles | Feature Structure | Score | Moderate_Severe in training set |
|-------------|------------|-------------------|-------|---------------------------------|
|-------------|------------|-------------------|-------|---------------------------------|

| FCFP_12                                | -1977641857 | 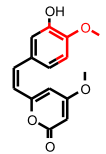<br><chem>[*][c](:[*]):[c](OC):[cH]:[*]</chem> | 0.416  | 18 out of 32                       |
|----------------------------------------|-------------|-----------------------------------------------------------------------------------------------------------------------------------|--------|------------------------------------|
| FCFP_12                                | 136627117   | <br><chem>[*]OC</chem>                         | 0.361  | 47 out of 90                       |
| FCFP_12                                | -1251367201 | <br><chem>[*]C1=[*]C(=CC(=O)O1)[*]</chem>      | 0.295  | 11 out of 22                       |
| Top Features for negative contribution |             |                                                                                                                                   |        |                                    |
| Fingerprint                            | Bit/Smiles  | Feature Structure                                                                                                                 | Score  | Moderate_Severe<br>in training set |
| FCFP_12                                | -166452859  | <br><chem>[*]=CC1=C[*]=CC(=O)O1</chem>        | -0.543 | 0 out of 2                         |
| FCFP_12                                | 451371068   | <br><chem>[*]C=C\[c](:[*]):[*]</chem>        | -0.226 | 9 out of 32                        |
|                                        |             |                                                                                                                                   |        |                                    |

|         |   |                                                                                                                                                                                                                                                                                                                                                                                                                                                                                                      |        |              |
|---------|---|------------------------------------------------------------------------------------------------------------------------------------------------------------------------------------------------------------------------------------------------------------------------------------------------------------------------------------------------------------------------------------------------------------------------------------------------------------------------------------------------------|--------|--------------|
| FCFP_12 | 7 | 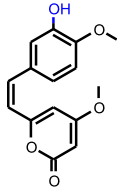 <p>Chemical structure of 6-methoxy-7-hydroxy-2,2'-biphenyl-3-one. The structure consists of two benzene rings connected by a single bond. The top ring has a hydroxyl group (OH) at position 7 and a methoxy group (OCH<sub>3</sub>) at position 6. The bottom ring has a carbonyl group (C=O) at position 3 and a methoxy group (OCH<sub>3</sub>) at position 6. The hydroxyl group is highlighted in blue.</p> | -0.223 | 20 out of 70 |
|---------|---|------------------------------------------------------------------------------------------------------------------------------------------------------------------------------------------------------------------------------------------------------------------------------------------------------------------------------------------------------------------------------------------------------------------------------------------------------------------------------------------------------|--------|--------------|

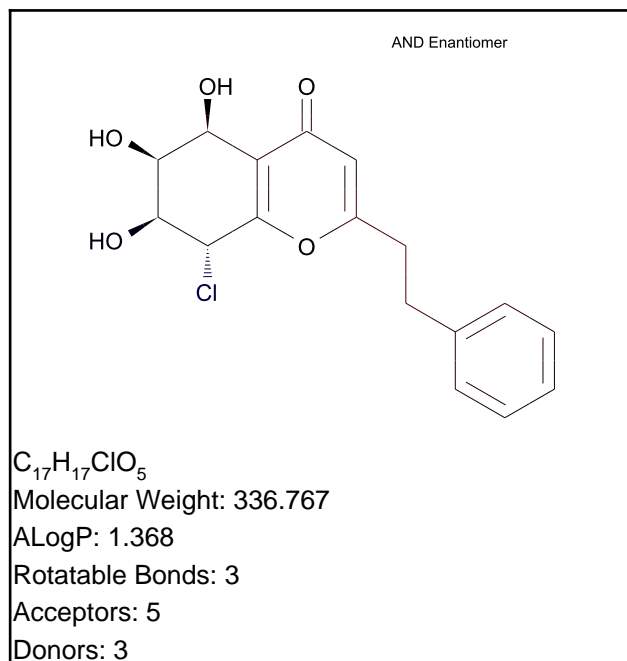

## Model Prediction

Prediction: Mild

Probability: 0.27

Enrichment: 0.733

Bayesian Score: -3.4

Mahalanobis Distance: 12.5

Mahalanobis Distance p-value: 4.28e-007

Prediction: Positive if the Bayesian score is above the estimated best cutoff value from minimizing the false positive and false negative rate.

Probability: The estimated probability that the sample is in the positive category. This assumes that the Bayesian score follows a normal distribution and is different from the prediction using a cutoff.

Enrichment: An estimate of enrichment, that is, the increased likelihood (versus random) of this sample being in the category.

Bayesian Score: The standard Laplacian-modified Bayesian score.

Mahalanobis Distance: The Mahalanobis distance (MD) is the distance to the center of the training data. The larger the MD, the less trustworthy the prediction.

Mahalanobis Distance p-value: The p-value gives the fraction of training data with an MD greater than or equal to the one for the given sample, assuming normally distributed data. The smaller the p-value, the less trustworthy the prediction. For highly non-normal X properties (e.g., fingerprints), the MD p-value is wildly inaccurate.

## Structural Similar Compounds

| Name               | Anthraquinone, 1,4-diamino-2-methoxy-                                                                                                                                           | C.I. Fluorescent Brightening Agent 24                                                                     | 5-Norbornene-2,3-dicarboxylic acid, 1,4,5,6,7,7-hexachloro-                                                                                       |
|--------------------|---------------------------------------------------------------------------------------------------------------------------------------------------------------------------------|-----------------------------------------------------------------------------------------------------------|---------------------------------------------------------------------------------------------------------------------------------------------------|
| Structure          | 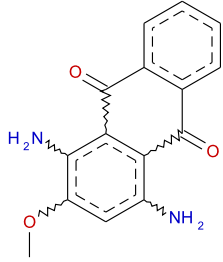                                                                                             |                        |                                                                |
| Actual Endpoint    | Moderate_Severe                                                                                                                                                                 | Mild                                                                                                      | Mild                                                                                                                                              |
| Predicted Endpoint | Mild                                                                                                                                                                            | Mild                                                                                                      | Mild                                                                                                                                              |
| Distance           | 0.743                                                                                                                                                                           | 0.757                                                                                                     | 0.758                                                                                                                                             |
| Reference          | NTIS** National Technical Information Service. (Springfield, VA 22161) Formerly U.S. Clearinghouse for Scientific & Technical Information. Volume(issue)/page/year: AD-A172-758 | MVCRB3 MVC-Report. (Stockholm, Sweden) No.1-2, 1972-73. Discontinued. Volume(issue)/page/year: 2,193,1973 | 85JCAE "Prehled Prumyslove Toxikologie; Organické Latky," Marhold, J., Prague, Czechoslovakia, Avicenum, 1986 Volume(issue)/page/year: -,581,1986 |

## Model Applicability

Unknown features are fingerprint features in the query molecule, but not found or appearing too infrequently in the training set.

1. OPS PC16 out of range. Value: 3.6979. Training min, max, SD, explained variance: -4.234, 3.1326, 1.134, 0.0174.

## Feature Contribution

### Top features for positive contribution

| Fingerprint | Bit/Smiles | Feature Structure | Score | Moderate_Severe in training set |
|-------------|------------|-------------------|-------|---------------------------------|
|-------------|------------|-------------------|-------|---------------------------------|

|                                        |            |                                                                                                                                                                             |        |                                 |
|----------------------------------------|------------|-----------------------------------------------------------------------------------------------------------------------------------------------------------------------------|--------|---------------------------------|
| FCFP_12                                | 436886043  | <p>AND Enantiomer</p> 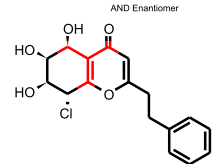 <p><chem>[*]C([*])C(=C([*])[*])C(=[*])[*])</chem></p>             | 0.503  | 68 out of 113                   |
| FCFP_12                                | 1388176727 | <p>AND Enantiomer</p>  <p><chem>[*]C(=[*])CC([c]1:[cH]:[cH]:[cH]:[cH]:[cH]:1)</chem></p> | 0.458  | 4 out of 6                      |
| FCFP_12                                | -497728148 | <p>AND Enantiomer</p>  <p><chem>[*]CC([c]1:[cH]:[cH]:[cH]:[cH]:[cH]:1)</chem></p>        | 0.332  | 21 out of 41                    |
| Top Features for negative contribution |            |                                                                                                                                                                             |        |                                 |
| Fingerprint                            | Bit/Smiles | Feature Structure                                                                                                                                                           | Score  | Moderate_Severe in training set |
| FCFP_12                                | 32         | <p>AND Enantiomer</p>  <p><chem>[*]Cl</chem></p>                                        | -0.789 | 16 out of 101                   |
| FCFP_12                                | 71953198   | <p>AND Enantiomer</p>  <p><chem>[*]C([*])Cl</chem></p>                                 | -0.548 | 10 out of 50                    |

|         |             |                                                                                                                                                            |        |            |
|---------|-------------|------------------------------------------------------------------------------------------------------------------------------------------------------------|--------|------------|
| FCFP_12 | -1305493555 | <p>AND Enantiomer</p> 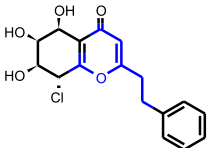 <p><chem>[*]CCC1=CC(=[*])[*]=C([*])O1</chem></p> | -0.308 | 0 out of 1 |
|---------|-------------|------------------------------------------------------------------------------------------------------------------------------------------------------------|--------|------------|

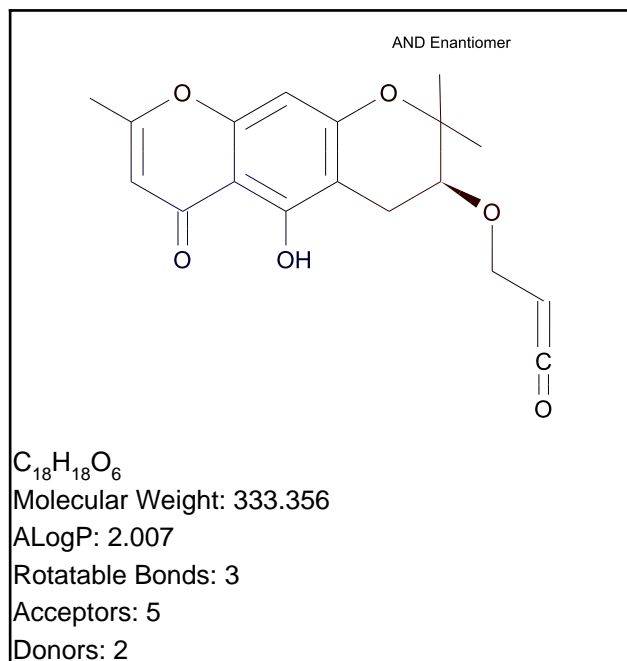

## Model Prediction

Prediction: Mild

Probability: 0.258

Enrichment: 0.701

Bayesian Score: -3.69

Mahalanobis Distance: 12.7

Mahalanobis Distance p-value: 1.23e-007

Prediction: Positive if the Bayesian score is above the estimated best cutoff value from minimizing the false positive and false negative rate.

Probability: The estimated probability that the sample is in the positive category. This assumes that the Bayesian score follows a normal distribution and is different from the prediction using a cutoff.

Enrichment: An estimate of enrichment, that is, the increased likelihood (versus random) of this sample being in the category.

Bayesian Score: The standard Laplacian-modified Bayesian score.

Mahalanobis Distance: The Mahalanobis distance (MD) is the distance to the center of the training data. The larger the MD, the less trustworthy the prediction.

Mahalanobis Distance p-value: The p-value gives the fraction of training data with an MD greater than or equal to the one for the given sample, assuming normally distributed data. The smaller the p-value, the less trustworthy the prediction. For highly non-normal X properties (e.g., fingerprints), the MD p-value is wildly inaccurate.

## Structural Similar Compounds

| Name               | 5-Norbornene-2,3-dicarboxylic acid, 1,4,5,6,7,7-hexachloro-                                                                                          | Anthraquinone, 1,4-diamino-2-methoxy-                                                                                                                                                 | Phenol, 4,4'-sulfonyldi-                                                                                                                                |
|--------------------|------------------------------------------------------------------------------------------------------------------------------------------------------|---------------------------------------------------------------------------------------------------------------------------------------------------------------------------------------|---------------------------------------------------------------------------------------------------------------------------------------------------------|
| Structure          | 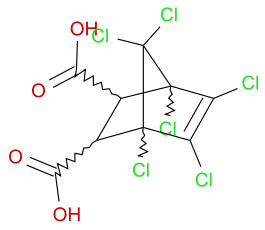                                                                  |                                                                                                    |                                                                      |
| Actual Endpoint    | Mild                                                                                                                                                 | Moderate_Severe                                                                                                                                                                       | Mild                                                                                                                                                    |
| Predicted Endpoint | Mild                                                                                                                                                 | Mild                                                                                                                                                                                  | Mild                                                                                                                                                    |
| Distance           | 0.642                                                                                                                                                | 0.691                                                                                                                                                                                 | 0.692                                                                                                                                                   |
| Reference          | 85JCAE "Prehled Prumyslove Toxikologie; Organické Latky," Marhold, J., Prague, Czechoslovakia, Avicenum, 1986<br>Volume(issue)/page/year: -,581,1986 | NTIS** National Technical Information Service. (Springfield, VA 22161)<br>Formerly U.S. Clearinghouse for Scientific & Technical Information.<br>Volume(issue)/page/year: AD-A172-758 | BIOFX* BIOFAX Industrial Bio-Test Laboratories, Inc., Data Sheets. (1810 Frontage Rd., Northbrook, IL 60062)<br>Volume(issue)/page/year: 601-05501,1974 |

## Model Applicability

Unknown features are fingerprint features in the query molecule, but not found or appearing too infrequently in the training set.

1. All properties and OPS components are within expected ranges.
2. Unknown FCFP\_2 feature: 444624378: [\*]C=C=O

## Feature Contribution

### Top features for positive contribution

| Fingerprint | Bit/Smiles | Feature Structure | Score | Moderate_Severe in training set |
|-------------|------------|-------------------|-------|---------------------------------|
|-------------|------------|-------------------|-------|---------------------------------|



|                                        |             |                                                                                                                                                                          |        |                                 |
|----------------------------------------|-------------|--------------------------------------------------------------------------------------------------------------------------------------------------------------------------|--------|---------------------------------|
| FCFP_12                                | -2000646149 | <p>AND Enantiomer</p> 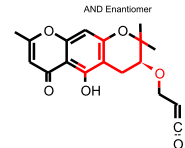 <p>[*]O[C@H]1C[c]([c]([*])[*]):[c]([c]([*])[*])C1([*])[*])</p> | 0.365  | 2 out of 3                      |
| FCFP_12                                | -1099193755 | <p>AND Enantiomer</p>  <p>[*]=C[c]1:[cH]:[*]:[cH]:[cH]:[c]:1OC</p>                    | 0.343  | 6 out of 11                     |
| FCFP_12                                | 451847724   | <p>AND Enantiomer</p>  <p>[*]\C=C\C(=[*])[*]</p>                                      | 0.257  | 101 out of 216                  |
| Top Features for negative contribution |             |                                                                                                                                                                          |        |                                 |
| Fingerprint                            | Bit/Smiles  | Feature Structure                                                                                                                                                        | Score  | Moderate_Severe in training set |
| FCFP_12                                | -1549192822 | <p>AND Enantiomer</p>  <p>[*]=CC(=O)[c]([c]([*])[*])[*])</p>                         | -0.909 | 1 out of 11                     |
| FCFP_12                                | -1979984779 | <p>AND Enantiomer</p>  <p>[*][C@H]1[*][c]([c]([*])[*]):[c](OC1(C)C):[cH]:[*])</p>   | -0.308 | 0 out of 1                      |

|         |            |                                                                                                                                                                          |        |            |
|---------|------------|--------------------------------------------------------------------------------------------------------------------------------------------------------------------------|--------|------------|
| FCFP_12 | 1244036906 | <p>AND Enantiomer</p> 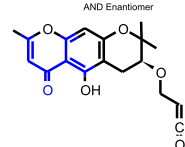 <p><chem>[*][c](:[*]):[c]1C(=O)C=C([*])[*][c]:1:[*]</chem></p> | -0.308 | 0 out of 1 |
|---------|------------|--------------------------------------------------------------------------------------------------------------------------------------------------------------------------|--------|------------|

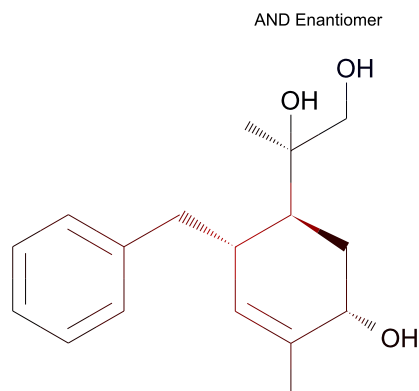
$$\text{C}_{17}\text{H}_{24}\text{O}_3$$

Molecular Weight: 276.371

|ALogP: 2.165

Rotatable Bonds: 4

Acceptors: 3

Donors: 3

## Model Prediction

Prediction: Mild

Probability: 0.452

Enrichment: 1.23

Bayesian Score: 0.935

Mahalanobis Distance: 10.9

Mahalanobis Distance p-value: 0.00124

Prediction: Positive if the Bayesian score is above the estimated best cutoff value from minimizing the false positive and false negative rate.

**Probability:** The estimated probability that the sample is in the positive category. This assumes that the Bayesian score follows a normal distribution and is different from the prediction using a cutoff.

Enrichment: An estimate of enrichment, that is, the increased likelihood (versus random) of this sample being in the category.  
Bayesian Score: The standard Laplacian-modified Bayesian score.

**Mahalanobis Distance:** The Mahalanobis distance (MD) is the distance to the center of the training data. The larger the MD, the less trustworthy the prediction.

Mahalanobis Distance p-value: The p-value gives the fraction of training data with an MD greater than or equal to the one for the given sample, assuming normally distributed data. The smaller the p-value, the less trustworthy the prediction. For highly non-normal X properties (e.g., fingerprints), the MD p-value is wildly inaccurate.

## Structural Similar Compounds

| Name               | o-Toluidine, N,N-bis(2-hydroxyethyl)-                                                                                                                 | Phenol, 4-(3-carbazolylamino)-                                                                                                                        | 2-Imidazoline, 2-(2,6-dichloroanilino)-                                                                                                           |
|--------------------|-------------------------------------------------------------------------------------------------------------------------------------------------------|-------------------------------------------------------------------------------------------------------------------------------------------------------|---------------------------------------------------------------------------------------------------------------------------------------------------|
| Structure          | 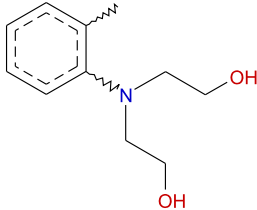                                                                   |                                                                    |                                                                |
| Actual Endpoint    | Mild                                                                                                                                                  | Mild                                                                                                                                                  | Mild                                                                                                                                              |
| Predicted Endpoint | Mild                                                                                                                                                  | Mild                                                                                                                                                  | Mild                                                                                                                                              |
| Distance           | 0.714                                                                                                                                                 | 0.747                                                                                                                                                 | 0.754                                                                                                                                             |
| Reference          | 85JCAE "Prehled Prumyslove Toxikologie; Organické Latky," Marhold, J., Prague , Czechoslovakia, Avicenum, 1986<br>Volume(issue)/page/year: -.697.1986 | 85JCAE "Prehled Prumyslove Toxikologie; Organické Latky," Marhold, J., Prague , Czechoslovakia, Avicenum, 1986<br>Volume(issue)/page/year: -.825.1986 | OYYAA2 Oyo Yakuri. Pharmacometrics. (Oyo Yakuri Kenkyukai, CPO Box 180, Sen dai 980-91, Japan) V.1- 1967-<br>Volume(issue)/page/year: 45,257,1993 |

## Model Applicability

Unknown features are fingerprint features in the query molecule, but not found or appearing too infrequently in the training set.

1. All properties and OPS components are within expected ranges.

## Feature Contribution

### Top features for positive contribution

| Fingerprint | Bit/Smiles  | Feature Structure                                                                                                                                                                                                          | Score | Moderate_Severe<br>in training set |
|-------------|-------------|----------------------------------------------------------------------------------------------------------------------------------------------------------------------------------------------------------------------------|-------|------------------------------------|
| FCFP_12     | -2005486458 | <p>AND Enantiomer</p> 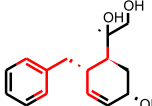 <p><chem>[*]C1([*])C@H([*])C1c2ccccc2</chem><br/> <chem>.[cH]1[*])[cH]1[*])</chem><br/> <chem>C=[*]</chem></p> | 0.717 | 4 out of 4                         |

|                                        |             |                                                                                                                                                                                |        |                                    |
|----------------------------------------|-------------|--------------------------------------------------------------------------------------------------------------------------------------------------------------------------------|--------|------------------------------------|
| FCFP_12                                | 1384456758  | <p>AND Enantiomer</p> 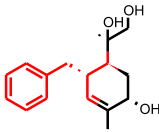 <p>[*]C([*])[C@@H](C[c]1<br/>:[cH]:[cH]:[cH]:[cH]<br/>:[cH]:1)C=</p> | 0.653  | 3 out of 3                         |
| FCFP_12                                | 436886043   | <p>AND Enantiomer</p>  <p>[*]C([*])C(=C([*])<br/>)C(=</p>                                   | 0.503  | 68 out of 113                      |
| Top Features for negative contribution |             |                                                                                                                                                                                |        |                                    |
| Fingerprint                            | Bit/Smiles  | Feature Structure                                                                                                                                                              | Score  | Moderate_Severe<br>in training set |
| FCFP_12                                | -1272709286 | <p>AND Enantiomer</p>  <p>[*]C([*])([*])CO</p>                                              | -0.475 | 18 out of 82                       |
| FCFP_12                                | 3           | <p>AND Enantiomer</p>  <p>[*]O</p>                                                        | -0.234 | 58 out of 204                      |
| FCFP_12                                | -2093839777 | <p>AND Enantiomer</p>  <p>[*][c]1:[cH]:[cH]:[cH]<br/>:[cH]:[cH]:1</p>                     | -0.207 | 30 out of 103                      |

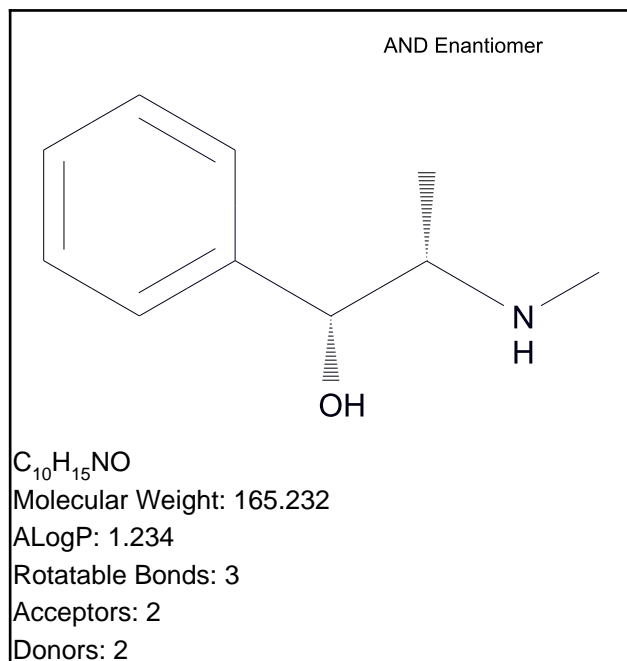

## Model Prediction

Prediction: Non-Irritant

Probability: 0.958

Enrichment: 1.04

Bayesian Score: -1.63

Mahalanobis Distance: 8.62

Mahalanobis Distance p-value: 0.624

Prediction: Positive if the Bayesian score is above the estimated best cutoff value from minimizing the false positive and false negative rate.

Probability: The estimated probability that the sample is in the positive category. This assumes that the Bayesian score follows a normal distribution and is different from the prediction using a cutoff.

Enrichment: An estimate of enrichment, that is, the increased likelihood (versus random) of this sample being in the category. Bayesian Score: The standard Laplacian-modified Bayesian score.

Mahalanobis Distance: The Mahalanobis distance (MD) is the distance to the center of the training data. The larger the MD, the less trustworthy the prediction.

Mahalanobis Distance p-value: The p-value gives the fraction of training data with an MD greater than or equal to the one for the given sample, assuming normally distributed data. The smaller the p-value, the less trustworthy the prediction. For highly non-normal X properties (e.g., fingerprints), the MD p-value is wildly inaccurate.

## Structural Similar Compounds

| Name               | Ethanol, 2-toluidino-                                                                                                                             | Benzyl alcohol, alpha-methyl-                                                                                                                   | 1,3-Hexanediol, 2-ethyl-methyl-                                                                                                       |
|--------------------|---------------------------------------------------------------------------------------------------------------------------------------------------|-------------------------------------------------------------------------------------------------------------------------------------------------|---------------------------------------------------------------------------------------------------------------------------------------|
| Structure          | 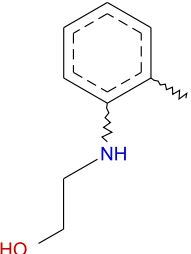                                                               |                                                              |                                                    |
| Actual Endpoint    | Irritant                                                                                                                                          | Irritant                                                                                                                                        | Irritant                                                                                                                              |
| Predicted Endpoint | Non-Irritant                                                                                                                                      | Irritant                                                                                                                                        | Irritant                                                                                                                              |
| Distance           | 0.439                                                                                                                                             | 0.519                                                                                                                                           | 0.557                                                                                                                                 |
| Reference          | 85JCAE "Prehled Prumyslove Toxikologie; Organické Latky," Marhold, J., Prague, Czechoslovakia, Avicenum, 1986 Volume(issue)/page/year: -,693,1986 | FCTXAV Food and Cosmetics Toxicology. (London, UK) V.1-19, 1963-81. For publisher information, see FCTOD7. Volume(issue)/page/year: 12,995,1974 | 34ZIAG "Toxicology of Drugs and Chemicals," Deichmann, W.B., New York, Academic Press, Inc., 1969 Volume(issue)/page/year: -,731,1969 |

## Model Applicability

Unknown features are fingerprint features in the query molecule, but not found or appearing too infrequently in the training set.

1. All properties and OPS components are within expected ranges.

## Feature Contribution

### Top Features for negative contribution

| Fingerprint | Bit/Smiles | Feature Structure                                                                                                                                                                | Score  | Irritant in training set |
|-------------|------------|----------------------------------------------------------------------------------------------------------------------------------------------------------------------------------|--------|--------------------------|
| FCFP_12     | 136686699  | <p style="text-align: center;">AND Enantiomer</p> 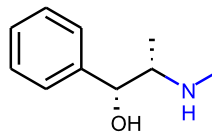 <p style="text-align: center;">[*]NC</p> | -0.484 | 3 out of 6               |

|         |             |                                                                                                                                                                                                                      |         |                |
|---------|-------------|----------------------------------------------------------------------------------------------------------------------------------------------------------------------------------------------------------------------|---------|----------------|
| FCFP_12 | -1083860676 | <p>AND Enantiomer</p> 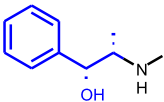 <p><chem>[*]C([*])[C@H](O)[c]1</chem><br/> <chem>:[cH]:[cH]:[cH]:[cH]</chem><br/> <chem>:[cH]:1</chem></p> | -0.153  | 3 out of 4     |
| FCFP_12 | 1618154665  | <p>AND Enantiomer</p>  <p><chem>[*][c](:[*]):[cH]:[cH]</chem><br/> <chem>]:[*]</chem></p>                                         | -0.0845 | 412 out of 490 |

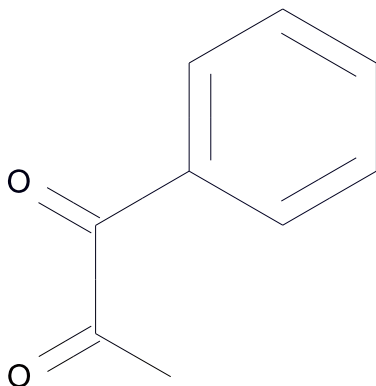C<sub>9</sub>H<sub>8</sub>O<sub>2</sub>

Molecular Weight: 148.159

ALogP: 1.446

Rotatable Bonds: 2

Acceptors: 2

Donors: 0

## Model Prediction

Prediction: Non-Irritant

Probability: 0.973

Enrichment: 1.06

Bayesian Score: -0.795

Mahalanobis Distance: 4.84

Mahalanobis Distance p-value: 1

Prediction: Positive if the Bayesian score is above the estimated best cutoff value from minimizing the false positive and false negative rate.

Probability: The estimated probability that the sample is in the positive category. This assumes that the Bayesian score follows a normal distribution and is different from the prediction using a cutoff.

Enrichment: An estimate of enrichment, that is, the increased likelihood (versus random) of this sample being in the category. Bayesian Score: The standard Laplacian-modified Bayesian score.

Mahalanobis Distance: The Mahalanobis distance (MD) is the distance to the center of the training data. The larger the MD, the less trustworthy the prediction.

Mahalanobis Distance p-value: The p-value gives the fraction of training data with an MD greater than or equal to the one for the given sample, assuming normally distributed data. The smaller the p-value, the less trustworthy the prediction. For highly non-normal X properties (e.g., fingerprints), the MD p-value is wildly inaccurate.

## Structural Similar Compounds

| Name               | Propiophenone                                                                                                                                     | Acetophenone, 4'-methoxy-                                                                                                                       | o-Anisaldehyde                                                                                                                                  |
|--------------------|---------------------------------------------------------------------------------------------------------------------------------------------------|-------------------------------------------------------------------------------------------------------------------------------------------------|-------------------------------------------------------------------------------------------------------------------------------------------------|
| Structure          |                                                                                                                                                   |                                                                                                                                                 |                                                                                                                                                 |
| Actual Endpoint    | Irritant                                                                                                                                          | Irritant                                                                                                                                        | Irritant                                                                                                                                        |
| Predicted Endpoint | Irritant                                                                                                                                          | Irritant                                                                                                                                        | Irritant                                                                                                                                        |
| Distance           | 0.411                                                                                                                                             | 0.427                                                                                                                                           | 0.430                                                                                                                                           |
| Reference          | 85JCAE "Prehled Prumyslove Toxikologie; Organické Latky," Marhold, J., Prague, Czechoslovakia, Avicenum, 1986 Volume(issue)/page/year: -,291,1986 | FCTXAV Food and Cosmetics Toxicology. (London, UK) V.1-19, 1963-81. For publisher information, see FCTOD7. Volume(issue)/page/year: 12,927,1974 | FCTXAV Food and Cosmetics Toxicology. (London, UK) V.1-19, 1963-81. For publisher information, see FCTOD7. Volume(issue)/page/year: 17,855,1979 |

## Model Applicability

Unknown features are fingerprint features in the query molecule, but not found or appearing too infrequently in the training set.

1. All properties and OPS components are within expected ranges.

## Feature Contribution

### Top features for positive contribution

| Fingerprint | Bit/Smiles | Feature Structure                 | Score | Irritant in training set |
|-------------|------------|-----------------------------------|-------|--------------------------|
| FCFP_12     | 565968762  | <br><chem>[*]C(=[*])C(=O)C</chem> | 0.075 | 78 out of 79             |

| Top Features for negative contribution |            |                                                                                                                                                    |         |                          |
|----------------------------------------|------------|----------------------------------------------------------------------------------------------------------------------------------------------------|---------|--------------------------|
| Fingerprint                            | Bit/Smiles | Feature Structure                                                                                                                                  | Score   | Irritant in training set |
| FCFP_12                                | 975909016  | 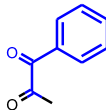<br><chem>[*]C(=[*])C(=O)[c]1:[cH]:[cH]:[cH]:[cH]:[cH]:1</chem> | -0.261  | 4 out of 6               |
| FCFP_12                                | -581162801 | <br><chem>[*]C(=[*])C(=O)[c]1:[cH]:[cH]:[*]:[cH]:[cH]:1</chem>  | -0.101  | 9 out of 11              |
| FCFP_12                                | 1618154665 | <br><chem>[*][c](:[*]):[cH]:[cH]:[*]</chem>                     | -0.0845 | 412 out of 490           |



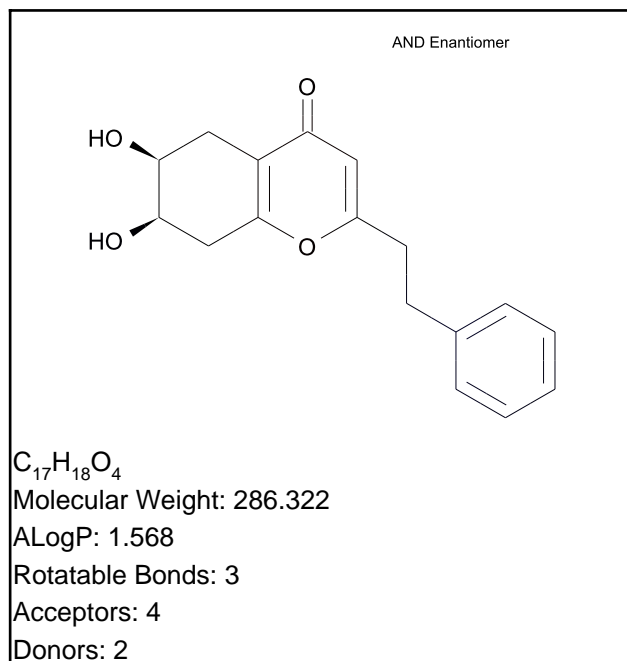

## Model Prediction

Prediction: Non-Irritant

Probability: 0.97

Enrichment: 1.05

Bayesian Score: -0.999

Mahalanobis Distance: 11.3

Mahalanobis Distance p-value: 0.000773

Prediction: Positive if the Bayesian score is above the estimated best cutoff value from minimizing the false positive and false negative rate.

Probability: The estimated probability that the sample is in the positive category. This assumes that the Bayesian score follows a normal distribution and is different from the prediction using a cutoff.

Enrichment: An estimate of enrichment, that is, the increased likelihood (versus random) of this sample being in the category.

Bayesian Score: The standard Laplacian-modified Bayesian score.

Mahalanobis Distance: The Mahalanobis distance (MD) is the distance to the center of the training data. The larger the MD, the less trustworthy the prediction.

Mahalanobis Distance p-value: The p-value gives the fraction of training data with an MD greater than or equal to the one for the given sample, assuming normally distributed data. The smaller the p-value, the less trustworthy the prediction. For highly non-normal X properties (e.g., fingerprints), the MD p-value is wildly inaccurate.

## Structural Similar Compounds

| Name               | Benzoin, oxime                                                                      | Benzophenone, 2,4-dihydroxy-                                                        | 1-Amino-2-bromo-4-hydroxyanthraquinone                                              |
|--------------------|-------------------------------------------------------------------------------------|-------------------------------------------------------------------------------------|-------------------------------------------------------------------------------------|
| Structure          | 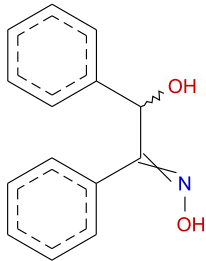 |  |  |
| Actual Endpoint    | Non-Irritant                                                                        | Non-Irritant                                                                        | Non-Irritant                                                                        |
| Predicted Endpoint | Non-Irritant                                                                        | Non-Irritant                                                                        | Non-Irritant                                                                        |
| Distance           | 0.639                                                                               | 0.668                                                                               | 0.669                                                                               |
| Reference          | 28ZPAK -,111,72                                                                     | 28ZPAK -,101,72                                                                     | 28ZPAK -,83,72                                                                      |

## Model Applicability

Unknown features are fingerprint features in the query molecule, but not found or appearing too infrequently in the training set.

1. All properties and OPS components are within expected ranges.

## Feature Contribution

### Top features for positive contribution

| Fingerprint | Bit/Smiles | Feature Structure                                                                                                                | Score  | Irritant in training set |
|-------------|------------|----------------------------------------------------------------------------------------------------------------------------------|--------|--------------------------|
| FCFP_12     | 436886043  | 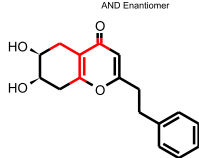<br><chem>*]CC(=C([*])[*])C(=[*])[*]</chem> | 0.0804 | 129 out of 130           |

| FCFP_12                                | 436915834  | <p>AND Enantiomer</p> 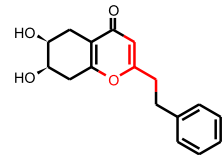 <p>[*]C\C(=C\[*])O[*]</p>                                    | 0.0756  | 6 out of 6               |
|----------------------------------------|------------|------------------------------------------------------------------------------------------------------------------------------------------------------------------------|---------|--------------------------|
| FCFP_12                                | 565968762  | <p>AND Enantiomer</p>  <p>[*]C(=[*])C(=O)C</p>                                      | 0.075   | 78 out of 79             |
| Top Features for negative contribution |            |                                                                                                                                                                        |         |                          |
| Fingerprint                            | Bit/Smiles | Feature Structure                                                                                                                                                      | Score   | Irritant in training set |
| FCFP_12                                | 1388176727 | <p>AND Enantiomer</p>  <p>[*]C(=[*])CC[c]1:[cH]<br/>:[cH]:[cH]:[cH]:[cH]<br/>:1</p> | -0.12   | 8 out of 10              |
| FCFP_12                                | 1618154665 | <p>AND Enantiomer</p>  <p>[*][c](:[*]):[cH]:[cH]<br/>:[*]</p>                      | -0.0845 | 412 out of 490           |
| FCFP_12                                | 16         | <p>AND Enantiomer</p>  <p>[*][c](:[*]):[*]</p>                                    | -0.0843 | 423 out of 503           |

AND Enantiomer

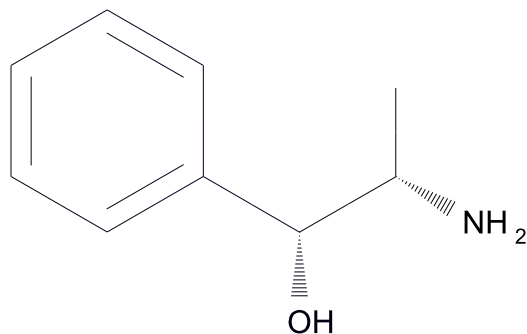C<sub>9</sub>H<sub>13</sub>NO

Molecular Weight: 151.206

ALogP: 0.802

Rotatable Bonds: 2

Acceptors: 2

Donors: 2

## Model Prediction

Prediction: Non-Irritant

Probability: 0.968

Enrichment: 1.05

Bayesian Score: -1.16

Mahalanobis Distance: 5.58

Mahalanobis Distance p-value: 1

Prediction: Positive if the Bayesian score is above the estimated best cutoff value from minimizing the false positive and false negative rate.

Probability: The estimated probability that the sample is in the positive category. This assumes that the Bayesian score follows a normal distribution and is different from the prediction using a cutoff.

Enrichment: An estimate of enrichment, that is, the increased likelihood (versus random) of this sample being in the category.

Bayesian Score: The standard Laplacian-modified Bayesian score.

Mahalanobis Distance: The Mahalanobis distance (MD) is the distance to the center of the training data. The larger the MD, the less trustworthy the prediction.

Mahalanobis Distance p-value: The p-value gives the fraction of training data with an MD greater than or equal to the one for the given sample, assuming normally distributed data. The smaller the p-value, the less trustworthy the prediction. For highly non-normal X properties (e.g., fingerprints), the MD p-value is wildly inaccurate.

## Structural Similar Compounds

| Name               | Methylamine, m-phenylenebis-                                                                                                                      | Methylamine, p-phenylenebis-                                                                                                                      | Acetanilide, 2'-hydroxy- |
|--------------------|---------------------------------------------------------------------------------------------------------------------------------------------------|---------------------------------------------------------------------------------------------------------------------------------------------------|--------------------------|
| Structure          |                                                                                                                                                   |                                                                                                                                                   |                          |
| Actual Endpoint    | Irritant                                                                                                                                          | Irritant                                                                                                                                          | Non-Irritant             |
| Predicted Endpoint | Non-Irritant                                                                                                                                      | Irritant                                                                                                                                          | Non-Irritant             |
| Distance           | 0.460                                                                                                                                             | 0.468                                                                                                                                             | 0.492                    |
| Reference          | 85JCAE "Prehled Prumyslove Toxikologie; Organické Latky," Marhold, J., Prague, Czechoslovakia, Avicenum, 1986 Volume(issue)/page/year: -,447,1986 | 85JCAE "Prehled Prumyslove Toxikologie; Organické Latky," Marhold, J., Prague, Czechoslovakia, Avicenum, 1986 Volume(issue)/page/year: -,448,1986 | 28ZPAK -,106,72          |

## Model Applicability

Unknown features are fingerprint features in the query molecule, but not found or appearing too infrequently in the training set.

1. All properties and OPS components are within expected ranges.

## Feature Contribution

### Top Features for negative contribution

| Fingerprint | Bit/Smiles  | Feature Structure                                  | Score  | Irritant in training set |
|-------------|-------------|----------------------------------------------------|--------|--------------------------|
| FCFP_12     | -1083860676 | <br><chem>[*]C([*])[C@H](O)[C@H](N)c1ccccc1</chem> | -0.153 | 3 out of 4               |

|         |            |                                                                                                                                                    |         |                |
|---------|------------|----------------------------------------------------------------------------------------------------------------------------------------------------|---------|----------------|
| FCFP_12 | 1618154665 | <p>AND Enantiomer</p> 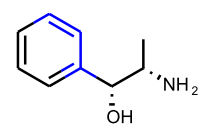 <p>[*][c](:[*]):[cH]:[cH]<br/>[:[*]]</p> | -0.0845 | 412 out of 490 |
| FCFP_12 | 16         | <p>AND Enantiomer</p>  <p>[*][c](:[*]):[*]</p>                  | -0.0843 | 423 out of 503 |

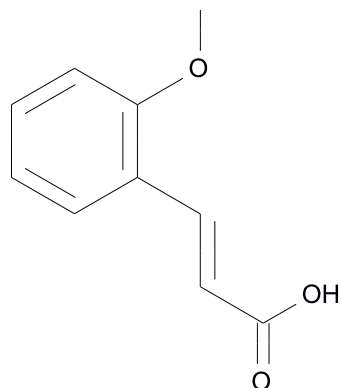
 $C_{10}H_{10}O_3$ 

Molecular Weight: 178.185

ALogP: 1.911

Rotatable Bonds: 3

Acceptors: 3

Donors: 1

## Model Prediction

**Prediction: Irritant**

Probability: 0.973

Enrichment: 1.06

Bayesian Score: -0.728

Mahalanobis Distance: 7.74

Mahalanobis Distance p-value: 0.941

Prediction: Positive if the Bayesian score is above the estimated best cutoff value from minimizing the false positive and false negative rate.

Probability: The estimated probability that the sample is in the positive category. This assumes that the Bayesian score follows a normal distribution and is different from the prediction using a cutoff.

Enrichment: An estimate of enrichment, that is, the increased likelihood (versus random) of this sample being in the category.

Bayesian Score: The standard Laplacian-modified Bayesian score.

Mahalanobis Distance: The Mahalanobis distance (MD) is the distance to the center of the training data. The larger the MD, the less trustworthy the prediction.

Mahalanobis Distance p-value: The p-value gives the fraction of training data with an MD greater than or equal to the one for the given sample, assuming normally distributed data. The smaller the p-value, the less trustworthy the prediction. For highly non-normal X properties (e.g., fingerprints), the MD p-value is wildly inaccurate.

## Structural Similar Compounds

| Name               | Cinnamic acid                                                                                                                                   | Salicylic acid, ethyl ester                                                                                                                     | Acetic acid, ((4-chloro-o-tolyl)oxy)-                                                                                                                                                          |
|--------------------|-------------------------------------------------------------------------------------------------------------------------------------------------|-------------------------------------------------------------------------------------------------------------------------------------------------|------------------------------------------------------------------------------------------------------------------------------------------------------------------------------------------------|
| Structure          |                                                                                                                                                 |                                                                                                                                                 |                                                                                                                                                                                                |
| Actual Endpoint    | Irritant                                                                                                                                        | Irritant                                                                                                                                        | Irritant                                                                                                                                                                                       |
| Predicted Endpoint | Irritant                                                                                                                                        | Irritant                                                                                                                                        | Non-Irritant                                                                                                                                                                                   |
| Distance           | 0.397                                                                                                                                           | 0.438                                                                                                                                           | 0.449                                                                                                                                                                                          |
| Reference          | FCTXAV Food and Cosmetics Toxicology. (London, UK) V.1-19, 1963-81. For publisher information, see FCTOD7. Volume(issue)/page/year: 16,687,1978 | FCTXAV Food and Cosmetics Toxicology. (London, UK) V.1-19, 1963-81. For publisher information, see FCTOD7. Volume(issue)/page/year: 16,751,1978 | ATDAEI Acute Toxicity Data. Journal of the American College of Toxicology, Part B. (Mary Ann Liebert, Inc., 1651 Third Ave., New York, NY 10128) V.1- 1990- Volume(issue)/page/year: 1,85,1990 |

## Model Applicability

Unknown features are fingerprint features in the query molecule, but not found or appearing too infrequently in the training set.

1. All properties and OPS components are within expected ranges.

## Feature Contribution

### Top features for positive contribution

| Fingerprint | Bit/Smiles | Feature Structure | Score | Irritant in training set |
|-------------|------------|-------------------|-------|--------------------------|
|-------------|------------|-------------------|-------|--------------------------|

| FCFP_12                                | -146015125  | 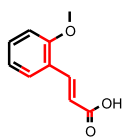<br><chem>[*]C(=[*])C=C\c([cH]1[*])[c]([1])[*]</chem> | 0.085  | 24 out of 24             |
|----------------------------------------|-------------|------------------------------------------------------------------------------------------------------------------------------------------|--------|--------------------------|
| FCFP_12                                | -2107131107 | <br><chem>[*]\C=C\C(=O)O</chem>                       | 0.0785 | 8 out of 8               |
| FCFP_12                                | 451847724   | <br><chem>[*]C(=CC(=[*])[*])[*]</chem>                | 0.0737 | 270 out of 274           |
| Top Features for negative contribution |             |                                                                                                                                          |        |                          |
| Fingerprint                            | Bit/Smiles  | Feature Structure                                                                                                                        | Score  | Irritant in training set |
| FCFP_12                                | -548632217  | <br><chem>[*]C(=[*])O</chem>                         | -0.128 | 49 out of 61             |
| FCFP_12                                | 7           | <br><chem>[*]O</chem>                               | -0.118 | 104 out of 128           |

|         |            |                                                                                                                                                                                                                                                                                                                                                                                                           |        |            |
|---------|------------|-----------------------------------------------------------------------------------------------------------------------------------------------------------------------------------------------------------------------------------------------------------------------------------------------------------------------------------------------------------------------------------------------------------|--------|------------|
| FCFP_12 | 1458856986 | 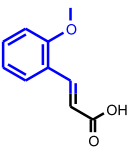 <p>Chemical structure of 3-(4-methoxyphenyl)acrylic acid, showing a benzene ring with a methoxy group (-OCH<sub>3</sub>) at the para position and a propenoic acid side chain (-CH=CH-COOH) at the other para position.</p> <chem>COC1=CC=C(C=C1)/C=C/C(=O)O</chem> <p>[*]=C[c]1:[cH]:[cH]:[cH]:[cH]:[cH]:[c]:1OC</p> | -0.109 | 4 out of 5 |
|---------|------------|-----------------------------------------------------------------------------------------------------------------------------------------------------------------------------------------------------------------------------------------------------------------------------------------------------------------------------------------------------------------------------------------------------------|--------|------------|

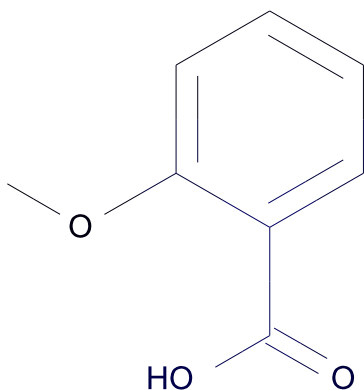C<sub>8</sub>H<sub>8</sub>O<sub>3</sub>

Molecular Weight: 152.147

ALogP: 1.443

Rotatable Bonds: 2

Acceptors: 3

Donors: 1

## Model Prediction

Prediction: Non-Irritant

Probability: 0.931

Enrichment: 1.01

Bayesian Score: -2.31

Mahalanobis Distance: 10.7

Mahalanobis Distance p-value: 0.00653

Prediction: Positive if the Bayesian score is above the estimated best cutoff value from minimizing the false positive and false negative rate.

Probability: The estimated probability that the sample is in the positive category. This assumes that the Bayesian score follows a normal distribution and is different from the prediction using a cutoff.

Enrichment: An estimate of enrichment, that is, the increased likelihood (versus random) of this sample being in the category.

Bayesian Score: The standard Laplacian-modified Bayesian score.

Mahalanobis Distance: The Mahalanobis distance (MD) is the distance to the center of the training data. The larger the MD, the less trustworthy the prediction.

Mahalanobis Distance p-value: The p-value gives the fraction of training data with an MD greater than or equal to the one for the given sample, assuming normally distributed data. The smaller the p-value, the less trustworthy the prediction. For highly non-normal X properties (e.g., fingerprints), the MD p-value is wildly inaccurate.

## Structural Similar Compounds

| Name               | Salicylic acid, methyl ester                                                                                                                    | Acetic acid, phenoxy-                                                                                                                           | Benzoic acid                                                                                                                                    |
|--------------------|-------------------------------------------------------------------------------------------------------------------------------------------------|-------------------------------------------------------------------------------------------------------------------------------------------------|-------------------------------------------------------------------------------------------------------------------------------------------------|
| Structure          |                                                                                                                                                 |                                                                                                                                                 |                                                                                                                                                 |
| Actual Endpoint    | Irritant                                                                                                                                        | Irritant                                                                                                                                        | Irritant                                                                                                                                        |
| Predicted Endpoint | Irritant                                                                                                                                        | Non-Irritant                                                                                                                                    | Non-Irritant                                                                                                                                    |
| Distance           | 0.355                                                                                                                                           | 0.381                                                                                                                                           | 0.393                                                                                                                                           |
| Reference          | FCTXAV Food and Cosmetics Toxicology. (London, UK) V.1-19, 1963-81. For publisher information, see FCTOD7. Volume(issue)/page/year: 16,821,1978 | FCTXAV Food and Cosmetics Toxicology. (London, UK) V.1-19, 1963-81. For publisher information, see FCTOD7. Volume(issue)/page/year: 17,887,1979 | BIOFX* BIOFAX Industrial Bio-Test Laboratories, Inc., Data Sheets. (1810 Frontage Rd., Northbrook, IL 60062) Volume(issue)/page/year: 28-4/1973 |

## Model Applicability

Unknown features are fingerprint features in the query molecule, but not found or appearing too infrequently in the training set.

1. All properties and OPS components are within expected ranges.

## Feature Contribution

| Top Features for negative contribution |            |                                                                |        |                          |
|----------------------------------------|------------|----------------------------------------------------------------|--------|--------------------------|
| Fingerprint                            | Bit/Smiles | Feature Structure                                              | Score  | Irritant in training set |
| FCFP_12                                | 937923569  | <br><chem>[*][c](:[*]):[c](:[cH]           ]:[*])C(=O)O</chem> | -0.612 | 5 out of 11              |



|         |             |                                                                                                                         |        |              |
|---------|-------------|-------------------------------------------------------------------------------------------------------------------------|--------|--------------|
| FCFP_12 | -1549222613 | 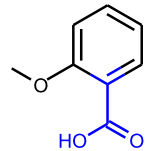<br><chem>[*]:[c](:[*])C(=O)O</chem> | -0.612 | 5 out of 11  |
| FCFP_12 | -548632217  | <br><chem>[*]C(=[*])O</chem>         | -0.128 | 49 out of 61 |

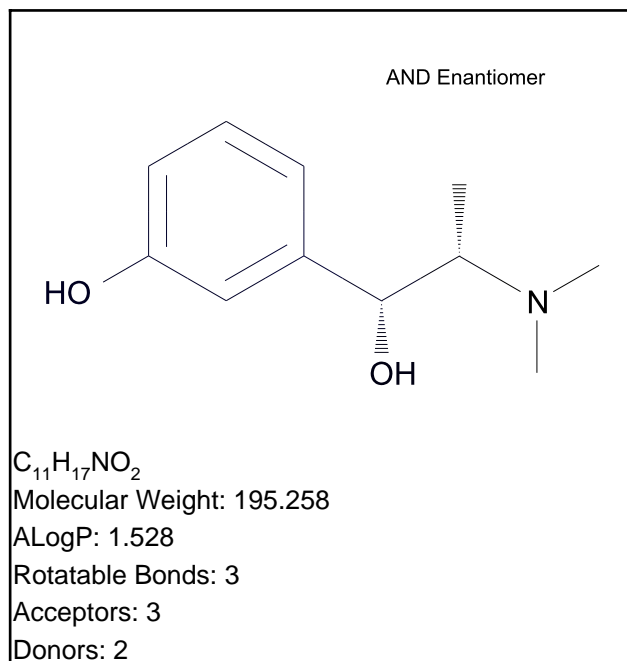

## Model Prediction

Prediction: Non-Irritant

Probability: 0.951

Enrichment: 1.03

Bayesian Score: -1.85

Mahalanobis Distance: 16.2

Mahalanobis Distance p-value: 4.69e-019

Prediction: Positive if the Bayesian score is above the estimated best cutoff value from minimizing the false positive and false negative rate.

Probability: The estimated probability that the sample is in the positive category. This assumes that the Bayesian score follows a normal distribution and is different from the prediction using a cutoff.

Enrichment: An estimate of enrichment, that is, the increased likelihood (versus random) of this sample being in the category.

Bayesian Score: The standard Laplacian-modified Bayesian score.

Mahalanobis Distance: The Mahalanobis distance (MD) is the distance to the center of the training data. The larger the MD, the less trustworthy the prediction.

Mahalanobis Distance p-value: The p-value gives the fraction of training data with an MD greater than or equal to the one for the given sample, assuming normally distributed data. The smaller the p-value, the less trustworthy the prediction. For highly non-normal X properties (e.g., fingerprints), the MD p-value is wildly inaccurate.

## Structural Similar Compounds

| Name               | o-Toluidine, N,N-bis(2-hydroxyethyl)-                                                                                                             | Benzoin, oxime                                                                      | Pyrocatechol, 4-tert-butyl-                                                         |
|--------------------|---------------------------------------------------------------------------------------------------------------------------------------------------|-------------------------------------------------------------------------------------|-------------------------------------------------------------------------------------|
| Structure          | 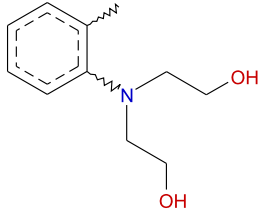                                                               |  |  |
| Actual Endpoint    | Irritant                                                                                                                                          | Non-Irritant                                                                        | Irritant                                                                            |
| Predicted Endpoint | Non-Irritant                                                                                                                                      | Non-Irritant                                                                        | Non-Irritant                                                                        |
| Distance           | 0.513                                                                                                                                             | 0.529                                                                               | 0.551                                                                               |
| Reference          | 85JCAE "Prehled Prumyslove Toxikologie; Organické Latky," Marhold, J., Prague, Czechoslovakia, Avicenum, 1986 Volume(issue)/page/year: -,697,1986 | 28ZPAK -,111,72                                                                     | AMIHBC 10,61,54                                                                     |

## Model Applicability

Unknown features are fingerprint features in the query molecule, but not found or appearing too infrequently in the training set.

1. All properties and OPS components are within expected ranges.

## Feature Contribution

### Top Features for negative contribution

| Fingerprint | Bit/Smiles | Feature Structure                                                                                                                                                                             | Score  | Irritant in training set |
|-------------|------------|-----------------------------------------------------------------------------------------------------------------------------------------------------------------------------------------------|--------|--------------------------|
| FCFP_12     | 949015626  | <p style="text-align: center;">AND Enantiomer</p> 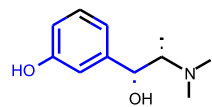 <p>[*]C([*])[c]1:[cH]:[*]<br/>:[cH]:[c](O):[cH]:1</p> | -0.222 | 2 out of 3               |

|         |             |                                                                                                                                                                 |        |                |
|---------|-------------|-----------------------------------------------------------------------------------------------------------------------------------------------------------------|--------|----------------|
| FCFP_12 | -1083860676 | <p>AND Enantiomer</p> 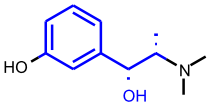 <p><chem>CN(C)[C@H](O)[C@@H](O)c1ccc(O)cc1</chem></p> | -0.153 | 3 out of 4     |
| FCFP_12 | 7           | <p>AND Enantiomer</p>  <p><chem>CN(C)[C@@H](O)[C@H](O)c1ccc(O)cc1</chem></p> | -0.118 | 104 out of 128 |

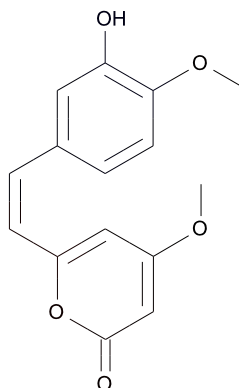
 $C_{15}H_{14}O_5$ 

Molecular Weight: 274.269

ALogP: 1.969

Rotatable Bonds: 4

Acceptors: 5

Donors: 1

## Model Prediction

**Prediction: Irritant**

Probability: 0.976

Enrichment: 1.06

Bayesian Score: -0.515

Mahalanobis Distance: 7.73

Mahalanobis Distance p-value: 0.943

Prediction: Positive if the Bayesian score is above the estimated best cutoff value from minimizing the false positive and false negative rate.

Probability: The estimated probability that the sample is in the positive category. This assumes that the Bayesian score follows a normal distribution and is different from the prediction using a cutoff.

Enrichment: An estimate of enrichment, that is, the increased likelihood (versus random) of this sample being in the category.

Bayesian Score: The standard Laplacian-modified Bayesian score.

Mahalanobis Distance: The Mahalanobis distance (MD) is the distance to the center of the training data. The larger the MD, the less trustworthy the prediction.

Mahalanobis Distance p-value: The p-value gives the fraction of training data with an MD greater than or equal to the one for the given sample, assuming normally distributed data. The smaller the p-value, the less trustworthy the prediction. For highly non-normal X properties (e.g., fingerprints), the MD p-value is wildly inaccurate.

## Structural Similar Compounds

| Name               | Benzenesulfonic acid, 3-(diethylamino)-, sodium salt                                                                                               | 2,8,9-Trioxa-5-aza-1-silabicyclo(3.3.3)undecane, 1-(3-aminopropyl)-                                                                                | 1-Valeryl-2-pipecoline |
|--------------------|----------------------------------------------------------------------------------------------------------------------------------------------------|----------------------------------------------------------------------------------------------------------------------------------------------------|------------------------|
| Structure          |                                                                                                                                                    |                                                                                                                                                    |                        |
| Actual Endpoint    | Irritant                                                                                                                                           | Irritant                                                                                                                                           | Irritant               |
| Predicted Endpoint | Non-Irritant                                                                                                                                       | Irritant                                                                                                                                           | Irritant               |
| Distance           | 0.592                                                                                                                                              | 0.607                                                                                                                                              | 0.616                  |
| Reference          | 85JCAE "Prehled Prumyslove Toxikologie; Organické Latky," Marhold, J., Prague, Czechoslovakia, Avicenum, 1986 Volume(issue)/page/year: -,1056,1986 | 85JCAE "Prehled Prumyslove Toxikologie; Organické Latky," Marhold, J., Prague, Czechoslovakia, Avicenum, 1986 Volume(issue)/page/year: -,1233,1986 | US ARMY                |

## Model Applicability

Unknown features are fingerprint features in the query molecule, but not found or appearing too infrequently in the training set.

1. All properties and OPS components are within expected ranges.

## Feature Contribution

### Top features for positive contribution

| Fingerprint | Bit/Smiles | Feature Structure | Score | Irritant in training set |
|-------------|------------|-------------------|-------|--------------------------|
|-------------|------------|-------------------|-------|--------------------------|

| FCFP_12                                | -1251367201 | 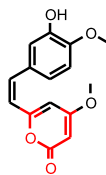<br><chem>[*]C1=[*]C(=CC(=O)O1)[*]</chem>                       | 0.0858 | 31 out of 31             |
|----------------------------------------|-------------|---------------------------------------------------------------------------------------------------------------------------------------------------|--------|--------------------------|
| FCFP_12                                | -146015125  | <br><chem>[*]C(=[*])C=C\[c]([c]([cH]([*])[c]([*])[*])])</chem> | 0.085  | 24 out of 24             |
| FCFP_12                                | 523826990   | <br><chem>[*]O[c]1:[cH]:[*]:[c]([*]):[cH]:[c]:1O</chem>        | 0.0756 | 6 out of 6               |
| Top Features for negative contribution |             |                                                                                                                                                   |        |                          |
| Fingerprint                            | Bit/Smiles  | Feature Structure                                                                                                                                 | Score  | Irritant in training set |
| FCFP_12                                | 949015626   | <br><chem>[*]C([*])[c]1:[cH]:[*]:[cH]:[c](O):[cH]:1</chem>    | -0.222 | 2 out of 3               |
| FCFP_12                                | 7           | <br><chem>[*]O</chem>                                        | -0.118 | 104 out of 128           |

|         |            |                                                                                                                    |       |              |
|---------|------------|--------------------------------------------------------------------------------------------------------------------|-------|--------------|
| FCFP_12 | -549108873 | 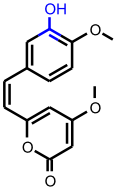<br><chem>[*]:[c](:[*])O</chem> | -0.11 | 54 out of 66 |
|---------|------------|--------------------------------------------------------------------------------------------------------------------|-------|--------------|

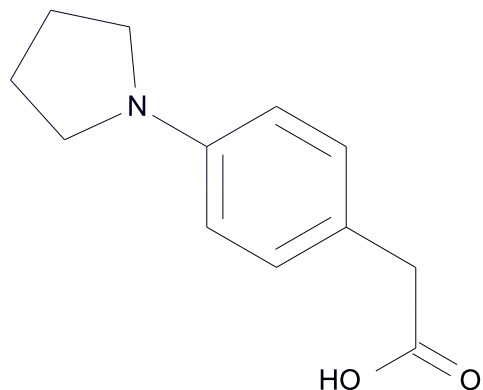

$C_{12}H_{15}NO_2$

Molecular Weight: 205.253

ALogP: 2.117

Rotatable Bonds: 3

Acceptors: 3

Donors: 1

## Model Prediction

Prediction: Non-Irritant

Probability: 0.964

Enrichment: 1.05

Bayesian Score: -1.37

Mahalanobis Distance: 10.9

Mahalanobis Distance p-value: 0.00314

Prediction: Positive if the Bayesian score is above the estimated best cutoff value from minimizing the false positive and false negative rate.

Probability: The estimated probability that the sample is in the positive category. This assumes that the Bayesian score follows a normal distribution and is different from the prediction using a cutoff.

Enrichment: An estimate of enrichment, that is, the increased likelihood (versus random) of this sample being in the category.

Bayesian Score: The standard Laplacian-modified Bayesian score.

Mahalanobis Distance: The Mahalanobis distance (MD) is the distance to the center of the training data. The larger the MD, the less trustworthy the prediction.

Mahalanobis Distance p-value: The p-value gives the fraction of training data with an MD greater than or equal to the one for the given sample, assuming normally distributed data. The smaller the p-value, the less trustworthy the prediction. For highly non-normal X properties (e.g., fingerprints), the MD p-value is wildly inaccurate.

## Structural Similar Compounds

| Name               | Acetic acid, ((4-chloro-o-tolyl)oxy)-                                                                                                                                                          | 2-Butanone, 4-(4-hydroxy-3-methoxyphenyl)-                                                                                                                    | Acetic acid, (2,4-dichlorophenoxy)-                                                                                                                                                                              |
|--------------------|------------------------------------------------------------------------------------------------------------------------------------------------------------------------------------------------|---------------------------------------------------------------------------------------------------------------------------------------------------------------|------------------------------------------------------------------------------------------------------------------------------------------------------------------------------------------------------------------|
| Structure          |                                                                                                                                                                                                |                                                                                                                                                               |                                                                                                                                                                                                                  |
| Actual Endpoint    | Irritant                                                                                                                                                                                       | Irritant                                                                                                                                                      | Irritant                                                                                                                                                                                                         |
| Predicted Endpoint | Non-Irritant                                                                                                                                                                                   | Irritant                                                                                                                                                      | Non-Irritant                                                                                                                                                                                                     |
| Distance           | 0.476                                                                                                                                                                                          | 0.481                                                                                                                                                         | 0.498                                                                                                                                                                                                            |
| Reference          | ATDAEI Acute Toxicity Data. Journal of the American College of Toxicology, Part B. (Mary Ann Liebert, Inc., 1651 Third Ave., New York, NY 10128) V.1- 1990- Volume(issue)/page/year: 1,85,1990 | FCTOD7 Food and Chemical Toxicology. (Pergamon Press Inc., Maxwell House, Fairview Park, Elmsford, NY 10523) V.20- 1982- Volume(issue)/page/year: 20,851,1982 | 28ZPAK "Sbornik Vysledku Toxikologickeho Vysetreni Latek A Pripravku," Marhold, J.V., Institut Pro Vychovu Vedoucich Pracovniku Chemickeho Prumyslu Praha, Czechoslovakia, 1972 Volume(issue)/page/year: -,279,1 |

## Model Applicability

Unknown features are fingerprint features in the query molecule, but not found or appearing too infrequently in the training set.

1. All properties and OPS components are within expected ranges.

## Feature Contribution

| Top features for positive contribution |            |                   |       |                          |
|----------------------------------------|------------|-------------------|-------|--------------------------|
| Fingerprint                            | Bit/Smiles | Feature Structure | Score | Irritant in training set |
|                                        |            |                   |       |                          |

|                                        |            |                                                                                                                                                              |        |                          |
|----------------------------------------|------------|--------------------------------------------------------------------------------------------------------------------------------------------------------------|--------|--------------------------|
| FCFP_12                                | 1985089045 | 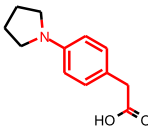<br><chem>[*]N([*])[c]1:[cH]:[cH]:[cH]:[c]1CC(=[*])[*]:[cH]:[cH]:1</chem> | 0.0785 | 8 out of 8               |
| FCFP_12                                | 1604677718 | <br><chem>[*]1[*]CN(C1)[c]2:[cH]:[cH]:[*]:[cH]:[cH]:[cH]:2</chem>         | 0.0785 | 8 out of 8               |
| FCFP_12                                | 202105689  | <br><chem>[*][c]1:[cH]:[cH]:[cH]:[c]1CC(=[*])N2CCCC2</chem>               | 0.0583 | 2 out of 2               |
| Top Features for negative contribution |            |                                                                                                                                                              |        |                          |
| Fingerprint                            | Bit/Smiles | Feature Structure                                                                                                                                            | Score  | Irritant in training set |
| FCFP_12                                | -822674211 | <br><chem>[*]:[c]([*])N1CCCC1</chem>                                     | -0.65  | 0 out of 1               |
| FCFP_12                                | -548632217 | <br><chem>[*]C(=[*])O</chem>                                            | -0.128 | 49 out of 61             |



|         |   |                                                                                                                                      |        |                |
|---------|---|--------------------------------------------------------------------------------------------------------------------------------------|--------|----------------|
| FCFP_12 | 7 | 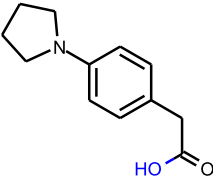<br><chem>O=C(O)Cc1ccc(cc1)N2CCCC2</chem><br>[*]O | -0.118 | 104 out of 128 |
|---------|---|--------------------------------------------------------------------------------------------------------------------------------------|--------|----------------|

AND Enantiomer

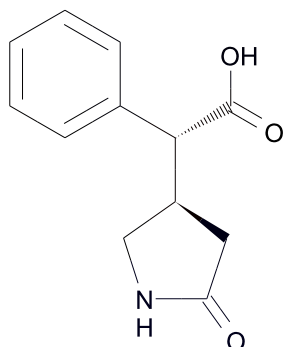C<sub>12</sub>H<sub>13</sub>NO<sub>3</sub>

Molecular Weight: 219.237

ALogP: 0.621

Rotatable Bonds: 3

Acceptors: 3

Donors: 2

## Model Prediction

Prediction: Non-Irritant

Probability: 0.961

Enrichment: 1.04

Bayesian Score: -1.5

Mahalanobis Distance: 9.76

Mahalanobis Distance p-value: 0.111

Prediction: Positive if the Bayesian score is above the estimated best cutoff value from minimizing the false positive and false negative rate.

Probability: The estimated probability that the sample is in the positive category. This assumes that the Bayesian score follows a normal distribution and is different from the prediction using a cutoff.

Enrichment: An estimate of enrichment, that is, the increased likelihood (versus random) of this sample being in the category.

Bayesian Score: The standard Laplacian-modified Bayesian score.

Mahalanobis Distance: The Mahalanobis distance (MD) is the distance to the center of the training data. The larger the MD, the less trustworthy the prediction.

Mahalanobis Distance p-value: The p-value gives the fraction of training data with an MD greater than or equal to the one for the given sample, assuming normally distributed data. The smaller the p-value, the less trustworthy the prediction. For highly non-normal X properties (e.g., fingerprints), the MD p-value is wildly inaccurate.

## Structural Similar Compounds

| Name               | Acetanilide, 3'-amino-4'-ethoxy- | Ethyl 4-hydroxy-2,6-dimethylcyclohexane carboxylate | Anthranilic acid, N-methyl- |
|--------------------|----------------------------------|-----------------------------------------------------|-----------------------------|
| Structure          |                                  |                                                     |                             |
| Actual Endpoint    | Non-Irritant                     | Non-Irritant                                        | Non-Irritant                |
| Predicted Endpoint | Non-Irritant                     | Non-Irritant                                        | Non-Irritant                |
| Distance           | 0.504                            | 0.560                                               | 0.564                       |
| Reference          | 28ZPAK -,115,72                  | US ARMY                                             | 28ZPAK -,441,72             |

## Model Applicability

Unknown features are fingerprint features in the query molecule, but not found or appearing too infrequently in the training set.

1. All properties and OPS components are within expected ranges.

## Feature Contribution

### Top features for positive contribution

| Fingerprint | Bit/Smiles | Feature Structure                                    | Score  | Irritant in training set |
|-------------|------------|------------------------------------------------------|--------|--------------------------|
| FCFP_12     | 1186303932 | <br><chem>[*]C([*])(C@@H(C(=O)O)C1CCNC1=O)[*]</chem> | 0.0838 | 18 out of 18             |

|                                        |             |                                                                                                                                                     |        |                          |
|----------------------------------------|-------------|-----------------------------------------------------------------------------------------------------------------------------------------------------|--------|--------------------------|
| FCFP_12                                | -1133295320 | <p>AND Enantiomer</p> 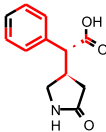 <p>[*]C([*])[C@@H](C(=O)N)C1=CC=CC=C1</p> | 0.0816 | 12 out of 12             |
| FCFP_12                                | -1716639150 | <p>AND Enantiomer</p>  <p>[*]C([*])[C@@H](C(=O)N)C1=CC=CC=C1</p> | 0.0658 | 3 out of 3               |
| Top Features for negative contribution |             |                                                                                                                                                     |        |                          |
| Fingerprint                            | Bit/Smiles  | Feature Structure                                                                                                                                   | Score  | Irritant in training set |
| FCFP_12                                | 566058135   | <p>AND Enantiomer</p>  <p>O=C1C[*][*]N1</p>                      | -0.367 | 13 out of 21             |
| FCFP_12                                | -547731249  | <p>AND Enantiomer</p>  <p>[*][C@@H]1CNC(=O)C1</p>              | -0.222 | 2 out of 3               |
| FCFP_12                                | -548632217  | <p>AND Enantiomer</p>  <p>[*]C(=[*])O</p>                      | -0.128 | 49 out of 61             |

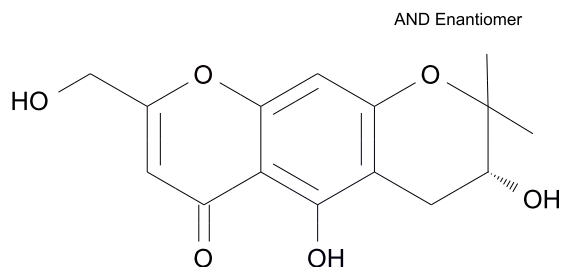
 $C_{15}H_{16}O_6$ 

Molecular Weight: 292.284

ALogP: 0.901

Rotatable Bonds: 1

Acceptors: 6

Donors: 3

## Model Prediction

Prediction: Non-Irritant

Probability: 0.97

Enrichment: 1.05

Bayesian Score: -0.998

Mahalanobis Distance: 12.3

Mahalanobis Distance p-value: 4.91e-006

Prediction: Positive if the Bayesian score is above the estimated best cutoff value from minimizing the false positive and false negative rate.

Probability: The estimated probability that the sample is in the positive category. This assumes that the Bayesian score follows a normal distribution and is different from the prediction using a cutoff.

Enrichment: An estimate of enrichment, that is, the increased likelihood (versus random) of this sample being in the category.

Bayesian Score: The standard Laplacian-modified Bayesian score.

Mahalanobis Distance: The Mahalanobis distance (MD) is the distance to the center of the training data. The larger the MD, the less trustworthy the prediction.

Mahalanobis Distance p-value: The p-value gives the fraction of training data with an MD greater than or equal to the one for the given sample, assuming normally distributed data. The smaller the p-value, the less trustworthy the prediction. For highly non-normal X properties (e.g., fingerprints), the MD p-value is wildly inaccurate.

## Structural Similar Compounds

| Name               | 8-Methylamino-4-hydroxy-2-naphthalene sulfonic acid | Anthraquinone, 1,2,4-trihydroxy- | Anthraquinone, 1,4-diamino-2-methoxy-                                                                                                                                                       |
|--------------------|-----------------------------------------------------|----------------------------------|---------------------------------------------------------------------------------------------------------------------------------------------------------------------------------------------|
| Structure          |                                                     |                                  |                                                                                                                                                                                             |
| Actual Endpoint    | Non-Irritant                                        | Non-Irritant                     | Irritant                                                                                                                                                                                    |
| Predicted Endpoint | Non-Irritant                                        | Non-Irritant                     | Non-Irritant                                                                                                                                                                                |
| Distance           | 0.619                                               | 0.650                            | 0.692                                                                                                                                                                                       |
| Reference          | 28ZPAK -,190,72                                     | 28ZPAK -,103,72                  | NTIS** National Technical Information Service.<br>(Springfield, VA 22161)<br>Formerly U.S. Clearinghouse for Scientific & Technical Information.<br>Volume(issue)/page/year:<br>AD-A172-758 |

## Model Applicability

Unknown features are fingerprint features in the query molecule, but not found or appearing too infrequently in the training set.

1. All properties and OPS components are within expected ranges.

## Feature Contribution

### Top features for positive contribution

| Fingerprint | Bit/Smiles | Feature Structure | Score | Irritant in training set |
|-------------|------------|-------------------|-------|--------------------------|
|-------------|------------|-------------------|-------|--------------------------|

|                                        |             |                                                                                                                                                                              |        |                          |
|----------------------------------------|-------------|------------------------------------------------------------------------------------------------------------------------------------------------------------------------------|--------|--------------------------|
| FCFP_12                                | 436915834   | 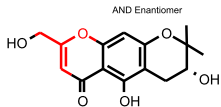 <p>AND Enantiomer</p> <chem>[*]C\C(=C\[*])\O[*]</chem>                                   | 0.0756 | 6 out of 6               |
| FCFP_12                                | 451847724   |  <p>AND Enantiomer</p> <chem>[*]C(=CC(=[*])[*])[*]</chem>                                 | 0.0737 | 270 out of 274           |
| FCFP_12                                | -1601875224 |  <p>AND Enantiomer</p> <chem>[*]C[c]1:[c]([*]):[*]:[c]([*]):[c](C(=[*])[*]):[c]:1O</chem> | 0.0734 | 5 out of 5               |
| Top Features for negative contribution |             |                                                                                                                                                                              |        |                          |
| Fingerprint                            | Bit/Smiles  | Feature Structure                                                                                                                                                            | Score  | Irritant in training set |
| FCFP_12                                | 7           |  <p>AND Enantiomer</p> <chem>[*]O</chem>                                                | -0.118 | 104 out of 128           |
| FCFP_12                                | -549108873  |  <p>AND Enantiomer</p> <chem>[*]:[c]([*])O</chem>                                       | -0.11  | 54 out of 66             |

FCFP\_12

74595001

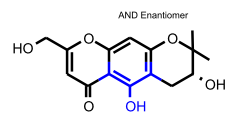

[\*]:[cH]:[c](O):[cH]:  
[\*]

-0.11

54 out of 66

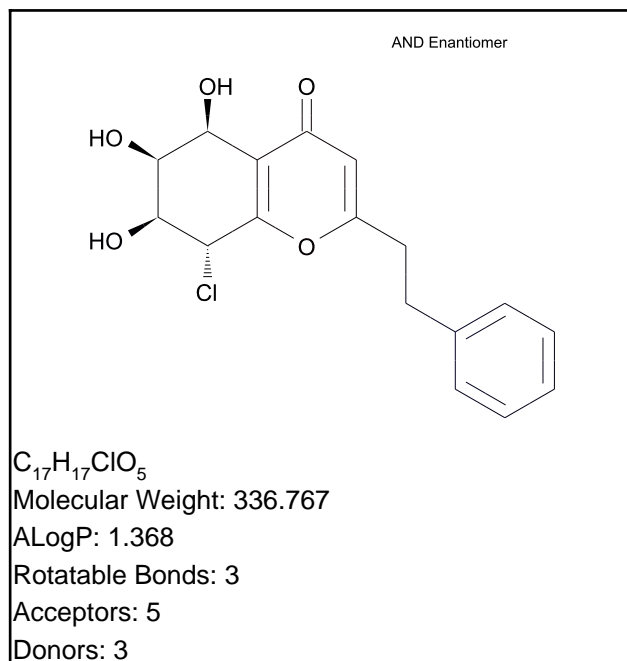

## Model Prediction

Prediction: Irritant

Probability: 0.975

Enrichment: 1.06

Bayesian Score: -0.625

Mahalanobis Distance: 12.4

Mahalanobis Distance p-value: 2.86e-006

Prediction: Positive if the Bayesian score is above the estimated best cutoff value from minimizing the false positive and false negative rate.

Probability: The estimated probability that the sample is in the positive category. This assumes that the Bayesian score follows a normal distribution and is different from the prediction using a cutoff.

Enrichment: An estimate of enrichment, that is, the increased likelihood (versus random) of this sample being in the category.

Bayesian Score: The standard Laplacian-modified Bayesian score.

Mahalanobis Distance: The Mahalanobis distance (MD) is the distance to the center of the training data. The larger the MD, the less trustworthy the prediction.

Mahalanobis Distance p-value: The p-value gives the fraction of training data with an MD greater than or equal to the one for the given sample, assuming normally distributed data. The smaller the p-value, the less trustworthy the prediction. For highly non-normal X properties (e.g., fingerprints), the MD p-value is wildly inaccurate.

## Structural Similar Compounds

| Name               | 8-Methylamino-4-hydroxy-2-naphthalene sulfonic acid                                 | p-Acetophenetidine, 3'-(bis(2-hydroxyethyl)amino)-                                  | Anthraquinone, 1,4-diamino-2-methoxy-                                                                                                                                           |
|--------------------|-------------------------------------------------------------------------------------|-------------------------------------------------------------------------------------|---------------------------------------------------------------------------------------------------------------------------------------------------------------------------------|
| Structure          | 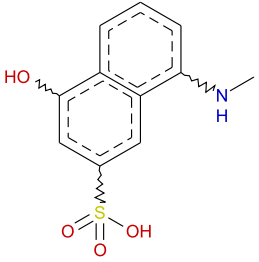 |  |                                                                                              |
| Actual Endpoint    | Non-Irritant                                                                        | Non-Irritant                                                                        | Irritant                                                                                                                                                                        |
| Predicted Endpoint | Non-Irritant                                                                        | Non-Irritant                                                                        | Non-Irritant                                                                                                                                                                    |
| Distance           | 0.703                                                                               | 0.738                                                                               | 0.739                                                                                                                                                                           |
| Reference          | 28ZPAK -,190,72                                                                     | 28ZPAK -,100,72                                                                     | NTIS** National Technical Information Service. (Springfield, VA 22161) Formerly U.S. Clearinghouse for Scientific & Technical Information. Volume(issue)/page/year: AD-A172-758 |

## Model Applicability

Unknown features are fingerprint features in the query molecule, but not found or appearing too infrequently in the training set.

1. All properties and OPS components are within expected ranges.

## Feature Contribution

### Top features for positive contribution

| Fingerprint | Bit/Smiles | Feature Structure | Score | Irritant in training set |
|-------------|------------|-------------------|-------|--------------------------|
|-------------|------------|-------------------|-------|--------------------------|





|         |    |                                                                                                                                   |         |                |
|---------|----|-----------------------------------------------------------------------------------------------------------------------------------|---------|----------------|
| FCFP_12 | 16 | <p>AND Enantiomer</p> 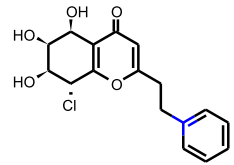 <p>[*][c](:[*]):[*]</p> | -0.0843 | 423 out of 503 |
|---------|----|-----------------------------------------------------------------------------------------------------------------------------------|---------|----------------|

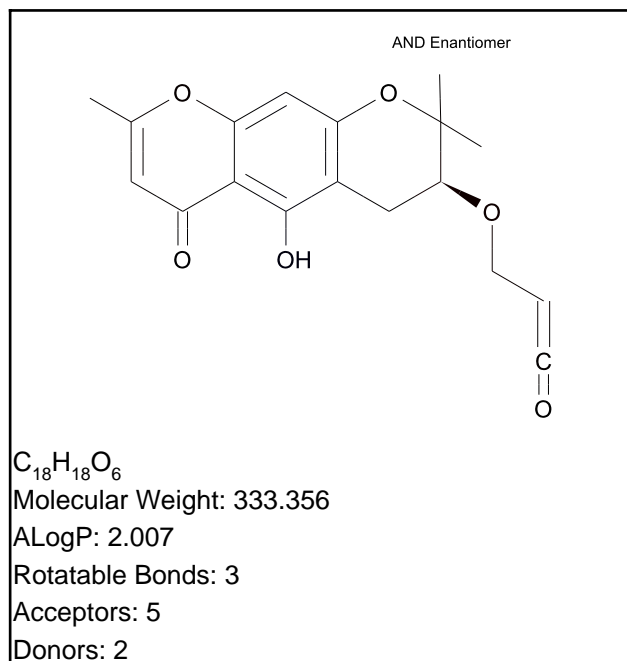

## Model Prediction

Prediction: Irritant

Probability: 0.975

Enrichment: 1.06

Bayesian Score: -0.544

Mahalanobis Distance: 13

Mahalanobis Distance p-value: 6.69e-008

Prediction: Positive if the Bayesian score is above the estimated best cutoff value from minimizing the false positive and false negative rate.

Probability: The estimated probability that the sample is in the positive category. This assumes that the Bayesian score follows a normal distribution and is different from the prediction using a cutoff.

Enrichment: An estimate of enrichment, that is, the increased likelihood (versus random) of this sample being in the category.

Bayesian Score: The standard Laplacian-modified Bayesian score.

Mahalanobis Distance: The Mahalanobis distance (MD) is the distance to the center of the training data. The larger the MD, the less trustworthy the prediction.

Mahalanobis Distance p-value: The p-value gives the fraction of training data with an MD greater than or equal to the one for the given sample, assuming normally distributed data. The smaller the p-value, the less trustworthy the prediction. For highly non-normal X properties (e.g., fingerprints), the MD p-value is wildly inaccurate.

## Structural Similar Compounds

| Name               | 5-Norbornene-2,3-dicarboxylic acid, 1,4,5,6,7,7-hexachloro-                                                                                       | 1-Amino-2-bromo-4-hydroxyanthraquinone                                              | 1-Amino-4-hydroxy-5-chloroanthraquinone                                             |
|--------------------|---------------------------------------------------------------------------------------------------------------------------------------------------|-------------------------------------------------------------------------------------|-------------------------------------------------------------------------------------|
| Structure          | 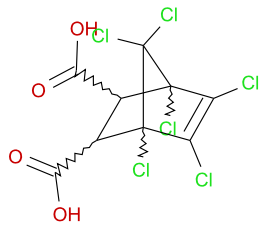                                                               |  |  |
| Actual Endpoint    | Irritant                                                                                                                                          | Non-Irritant                                                                        | Non-Irritant                                                                        |
| Predicted Endpoint | Irritant                                                                                                                                          | Non-Irritant                                                                        | Non-Irritant                                                                        |
| Distance           | 0.649                                                                                                                                             | 0.655                                                                               | 0.692                                                                               |
| Reference          | 85JCAE "Prehled Prumyslove Toxikologie; Organické Latky," Marhold, J., Prague, Czechoslovakia, Avicenum, 1986 Volume(issue)/page/year: -,581,1986 | 28ZPAK -,83,72                                                                      | 28ZPAK -,83,72                                                                      |

## Model Applicability

Unknown features are fingerprint features in the query molecule, but not found or appearing too infrequently in the training set.

1. All properties and OPS components are within expected ranges.
2. Unknown FCFP\_2 feature: 444624378: [\*]C=C=O

## Feature Contribution

### Top features for positive contribution

| Fingerprint | Bit/Smiles | Feature Structure | Score | Irritant in training set |
|-------------|------------|-------------------|-------|--------------------------|
|-------------|------------|-------------------|-------|--------------------------|

|                                        |             |                                                                                                                                                   |        |                          |
|----------------------------------------|-------------|---------------------------------------------------------------------------------------------------------------------------------------------------|--------|--------------------------|
| FCFP_12                                | 353886735   | <p>AND Enantiomer</p> 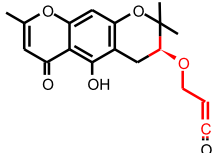 <p>[*]C([*])OCC=C=[*]</p>               | 0.0863 | 37 out of 37             |
| FCFP_12                                | -1687409379 | <p>AND Enantiomer</p>  <p>[*]C[C@H](OCC=[*])C([*])([*])[*]</p> | 0.0795 | 9 out of 9               |
| FCFP_12                                | 436915834   | <p>AND Enantiomer</p>  <p>[*]C\C(=C\[*])\O[*]</p>              | 0.0756 | 6 out of 6               |
| Top Features for negative contribution |             |                                                                                                                                                   |        |                          |
| Fingerprint                            | Bit/Smiles  | Feature Structure                                                                                                                                 | Score  | Irritant in training set |
| FCFP_12                                | 7           | <p>AND Enantiomer</p>  <p>[*]O</p>                           | -0.118 | 104 out of 128           |
| FCFP_12                                | -549108873  | <p>AND Enantiomer</p>  <p>[*]:[c](:[*])O</p>                 | -0.11  | 54 out of 66             |

|         |          |                                                                                                                                                |       |              |
|---------|----------|------------------------------------------------------------------------------------------------------------------------------------------------|-------|--------------|
| FCFP_12 | 74595001 | <p>AND Enantiomer</p> 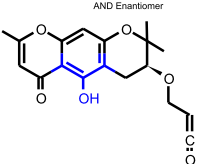 <p>[*]:[cH]:[c](O):[cH]:<br/>[*]</p> | -0.11 | 54 out of 66 |
|---------|----------|------------------------------------------------------------------------------------------------------------------------------------------------|-------|--------------|

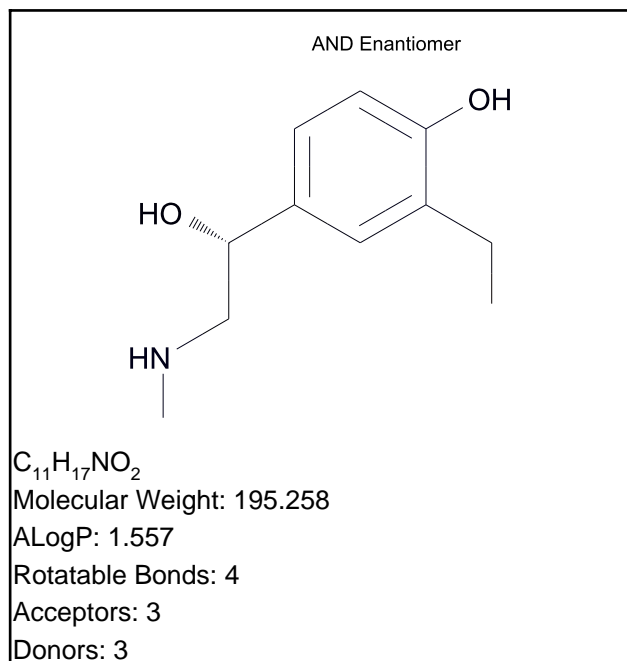

## Model Prediction

Prediction: Non-Irritant

Probability: 0.955

Enrichment: 1.04

Bayesian Score: -1.71

Mahalanobis Distance: 8.74

Mahalanobis Distance p-value: 0.559

Prediction: Positive if the Bayesian score is above the estimated best cutoff value from minimizing the false positive and false negative rate.

Probability: The estimated probability that the sample is in the positive category. This assumes that the Bayesian score follows a normal distribution and is different from the prediction using a cutoff.

Enrichment: An estimate of enrichment, that is, the increased likelihood (versus random) of this sample being in the category.

Bayesian Score: The standard Laplacian-modified Bayesian score.

Mahalanobis Distance: The Mahalanobis distance (MD) is the distance to the center of the training data. The larger the MD, the less trustworthy the prediction.

Mahalanobis Distance p-value: The p-value gives the fraction of training data with an MD greater than or equal to the one for the given sample, assuming normally distributed data. The smaller the p-value, the less trustworthy the prediction. For highly non-normal X properties (e.g., fingerprints), the MD p-value is wildly inaccurate.

## Structural Similar Compounds

| Name               | o-Toluidine, N,N-bis(2-hydroxyethyl)-                                                                                                             | Benzoin, oxime                                                                      | Benzophenone, 2,4-dihydroxy-                                                        |
|--------------------|---------------------------------------------------------------------------------------------------------------------------------------------------|-------------------------------------------------------------------------------------|-------------------------------------------------------------------------------------|
| Structure          | 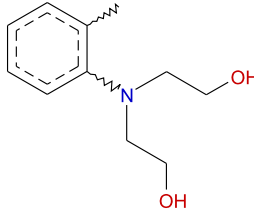                                                               |  |  |
| Actual Endpoint    | Irritant                                                                                                                                          | Non-Irritant                                                                        | Non-Irritant                                                                        |
| Predicted Endpoint | Non-Irritant                                                                                                                                      | Non-Irritant                                                                        | Non-Irritant                                                                        |
| Distance           | 0.650                                                                                                                                             | 0.657                                                                               | 0.675                                                                               |
| Reference          | 85JCAE "Prehled Prumyslove Toxikologie; Organické Latky," Marhold, J., Prague, Czechoslovakia, Avicenum, 1986 Volume(issue)/page/year: -,697,1986 | 28ZPAK -,111,72                                                                     | 28ZPAK -,101,72                                                                     |

## Model Applicability

Unknown features are fingerprint features in the query molecule, but not found or appearing too infrequently in the training set.

1. All properties and OPS components are within expected ranges.

## Feature Contribution

### Top features for positive contribution

| Fingerprint | Bit/Smiles  | Feature Structure                                                                                                                                               | Score  | Irritant in training set |
|-------------|-------------|-----------------------------------------------------------------------------------------------------------------------------------------------------------------|--------|--------------------------|
| FCFP_12     | -1710155973 | <p>AND Enantiomer</p> 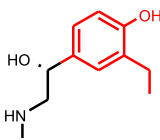 <p>[*][c]1:[cH]:[cH]:[c]<br/>(O):[c](CC):[cH]:1</p> | 0.0658 | 3 out of 3               |

|                                        |             |                                                                                                                                                                   |        |                          |
|----------------------------------------|-------------|-------------------------------------------------------------------------------------------------------------------------------------------------------------------|--------|--------------------------|
| FCFP_12                                | -542873837  | <p>AND Enantiomer</p> 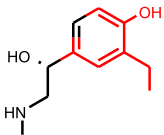 <p>[*][c]1:[*]:[cH]:[c](O):[c](CC):[cH]:1</p>           | 0.0658 | 3 out of 3               |
| FCFP_12                                | -306804326  | <p>AND Enantiomer</p>  <p>[*]C[c]1:[cH]:[c](:[cH]:[cH]:[c]:1O)C([*])[*]</p>    | 0.0658 | 3 out of 3               |
| Top Features for negative contribution |             |                                                                                                                                                                   |        |                          |
| Fingerprint                            | Bit/Smiles  | Feature Structure                                                                                                                                                 | Score  | Irritant in training set |
| FCFP_12                                | 136686699   | <p>AND Enantiomer</p>  <p>[*]NC</p>                                            | -0.484 | 3 out of 6               |
| FCFP_12                                | -1604301295 | <p>AND Enantiomer</p>  <p>[*]C[c]1:[cH]:[*]:[cH]:[cH]:[c]:1O</p>             | -0.18  | 22 out of 29             |
| FCFP_12                                | -451251206  | <p>AND Enantiomer</p>  <p>[*]C[c]1:[cH]:[c](:[cH]:[*]:[c]:1[*])C([*])[*]</p> | -0.132 | 44 out of 55             |

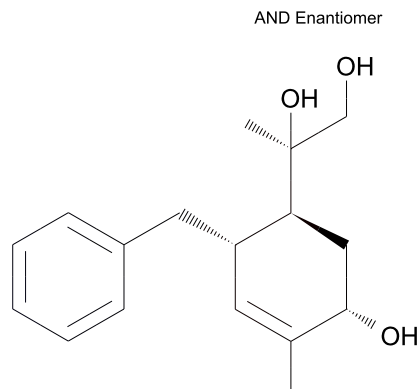
 $C_{17}H_{24}O_3$ 

Molecular Weight: 276.371

ALogP: 2.165

Rotatable Bonds: 4

Acceptors: 3

Donors: 3

## Model Prediction

Prediction: Irritant

Probability: 0.977

Enrichment: 1.06

Bayesian Score: -0.373

Mahalanobis Distance: 11.2

Mahalanobis Distance p-value: 0.00105

Prediction: Positive if the Bayesian score is above the estimated best cutoff value from minimizing the false positive and false negative rate.

Probability: The estimated probability that the sample is in the positive category. This assumes that the Bayesian score follows a normal distribution and is different from the prediction using a cutoff.

Enrichment: An estimate of enrichment, that is, the increased likelihood (versus random) of this sample being in the category.

Bayesian Score: The standard Laplacian-modified Bayesian score.

Mahalanobis Distance: The Mahalanobis distance (MD) is the distance to the center of the training data. The larger the MD, the less trustworthy the prediction.

Mahalanobis Distance p-value: The p-value gives the fraction of training data with an MD greater than or equal to the one for the given sample, assuming normally distributed data. The smaller the p-value, the less trustworthy the prediction. For highly non-normal X properties (e.g., fingerprints), the MD p-value is wildly inaccurate.

## Structural Similar Compounds

| Name               | Benzoin, oxime  | o-Toluidine, N,N-bis(2-hydroxyethyl)-                                                                                                             | Benzophenone, 2,4-dihydroxy- |
|--------------------|-----------------|---------------------------------------------------------------------------------------------------------------------------------------------------|------------------------------|
| Structure          |                 |                                                                                                                                                   |                              |
| Actual Endpoint    | Non-Irritant    | Irritant                                                                                                                                          | Non-Irritant                 |
| Predicted Endpoint | Non-Irritant    | Non-Irritant                                                                                                                                      | Non-Irritant                 |
| Distance           | 0.669           | 0.713                                                                                                                                             | 0.724                        |
| Reference          | 28ZPAK -,111,72 | 85JCAE "Prehled Prumyslove Toxikologie; Organické Latky," Marhold, J., Prague, Czechoslovakia, Avicenum, 1986 Volume(issue)/page/year: -,697,1986 | 28ZPAK -,101,72              |

## Model Applicability

Unknown features are fingerprint features in the query molecule, but not found or appearing too infrequently in the training set.

1. All properties and OPS components are within expected ranges.

## Feature Contribution

### Top features for positive contribution

| Fingerprint | Bit/Smiles | Feature Structure                                  | Score  | Irritant in training set |
|-------------|------------|----------------------------------------------------|--------|--------------------------|
| FCFP_12     | -415156552 | <p>AND Enantiomer</p> <p>[*]C[C@](C)(O)C([*])C</p> | 0.0854 | 27 out of 27             |

|                                        |            |                                                                                                                                                     |         |                          |
|----------------------------------------|------------|-----------------------------------------------------------------------------------------------------------------------------------------------------|---------|--------------------------|
| FCFP_12                                | 436886043  | <p>AND Enantiomer</p> 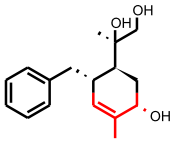 <p>[*]CC(=C([*])([*])C(=[*])([*])[*])</p> | 0.0804  | 129 out of 130           |
| FCFP_12                                | 451847724  | <p>AND Enantiomer</p>  <p>[*]C(=CC(=[*])([*])[*])</p>            | 0.0737  | 270 out of 274           |
| Top Features for negative contribution |            |                                                                                                                                                     |         |                          |
| Fingerprint                            | Bit/Smiles | Feature Structure                                                                                                                                   | Score   | Irritant in training set |
| FCFP_12                                | 1618154665 | <p>AND Enantiomer</p>  <p>[*][c](:[*]):[cH]:[cH]:[*]</p>         | -0.0845 | 412 out of 490           |
| FCFP_12                                | 16         | <p>AND Enantiomer</p>  <p>[*][c](:[*]):[*]</p>                 | -0.0843 | 423 out of 503           |
| FCFP_12                                | 3          | <p>AND Enantiomer</p>  <p>[*]O</p>                             | -0.0812 | 291 out of 345           |



# Simeprevir

# TOPKAT\_Skin\_Irritancy\_None\_vs\_Irritant

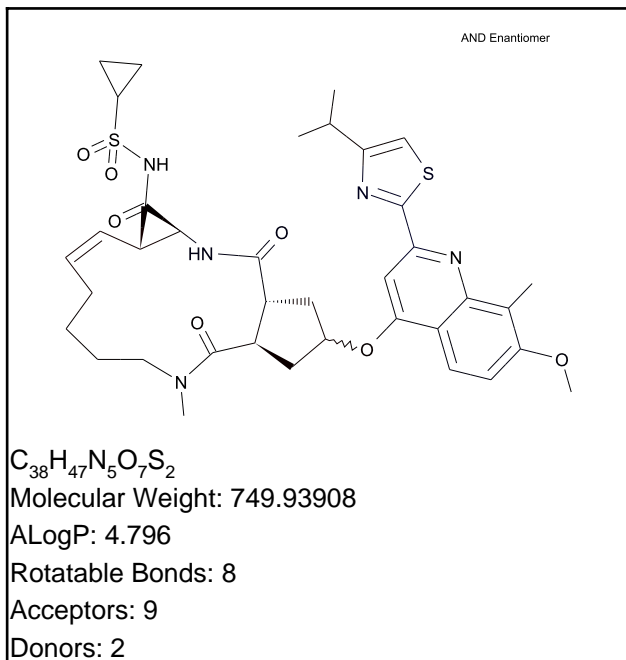

## Model Prediction

Prediction: Non-Irritant

Probability: 0.969

Enrichment: 1.05

Bayesian Score: -1.05

Mahalanobis Distance: 16.8

Mahalanobis Distance p-value: 1.98e-021

Prediction: Positive if the Bayesian score is above the estimated best cutoff value from minimizing the false positive and false negative rate.

Probability: The estimated probability that the sample is in the positive category. This assumes that the Bayesian score follows a normal distribution and is different from the prediction using a cutoff.

Enrichment: An estimate of enrichment, that is, the increased likelihood (versus random) of this sample being in the category.

Bayesian Score: The standard Laplacian-modified Bayesian score.

Mahalanobis Distance: The Mahalanobis distance (MD) is the distance to the center of the training data. The larger the MD, the less trustworthy the prediction.

Mahalanobis Distance p-value: The p-value gives the fraction of training data with an MD greater than or equal to the one for the given sample, assuming normally distributed data. The smaller the p-value, the less trustworthy the prediction. For highly non-normal X properties (e.g., fingerprints), the MD p-value is wildly inaccurate.

## Structural Similar Compounds

| Name               | Anthraquinone, 3-methoxy-5,4'-iminobis(1-benzamido-                                                                                                                                                               | Benzenesulfonic acid, 2,2'-(1,4-anthraquinonylenediimino)bis(5-methyl-, disodium salt                                                                 | Butanamide, 2,2'-((3,3'-dichloro(1,1'-biphenyl)-4,4'-diyl)bis(azo)) bis(N-(2,4-dimethylphenyl)-3-oxo-                                                                          |
|--------------------|-------------------------------------------------------------------------------------------------------------------------------------------------------------------------------------------------------------------|-------------------------------------------------------------------------------------------------------------------------------------------------------|--------------------------------------------------------------------------------------------------------------------------------------------------------------------------------|
| Structure          | 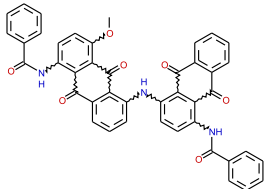                                                                                                                               |                                                                    |                                                                                             |
| Actual Endpoint    | Irritant                                                                                                                                                                                                          | Irritant                                                                                                                                              | Irritant                                                                                                                                                                       |
| Predicted Endpoint | Non-Irritant                                                                                                                                                                                                      | Non-Irritant                                                                                                                                          | Non-Irritant                                                                                                                                                                   |
| Distance           | 0.883                                                                                                                                                                                                             | 1.016                                                                                                                                                 | 1.027                                                                                                                                                                          |
| Reference          | 28ZPAK "Sbornik Vysledku Toxologickeho Vysetreni Latek A Pripravku," Marhold, J.V., Institut Pro Vychovu Vedoucich Pracovniku Chemickeho Prumyclu Praha, Czechoslovakia, 1972<br>Volume(issue)/page/year: -,114,1 | 85JCAE "Prehled Prumyslove Toxikologie; Organické Latky," Marhold, J., Prague, Czechoslovakia, Avicenum, 1986<br>Volume(issue)/page/year: -,1330,1986 | NTIS** National Technical Information Service. (Springfield, VA 22161) Formerly U.S. Clearinghouse for Scientific & Technical Information. Volume(issue)/page/year: OTS0555058 |

## Model Applicability

Unknown features are fingerprint features in the query molecule, but not found or appearing too infrequently in the training set.

- OPS PC6 out of range. Value: 7.6964. Training min, max, SD, explained variance: -5.7225, 6.867, 1.786, 0.0403.
- OPS PC22 out of range. Value: 5.13. Training min, max, SD, explained variance: -2.9568, 3.7845, 1.016, 0.0131.

## Feature Contribution

| Top features for positive contribution |            |                   |       |                          |
|----------------------------------------|------------|-------------------|-------|--------------------------|
| Fingerprint                            | Bit/Smiles | Feature Structure | Score | Irritant in training set |
|                                        |            |                   |       |                          |



FCFP\_12

-1320007763

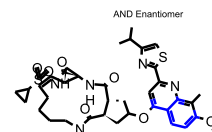

[\*][c](:[\*]):[c]1:[cH]  
]:[cH]:[c]([\*]):[\*]:  
[c]:1:[\*]

-0.0893

20 out of 24

AND Enantiomer

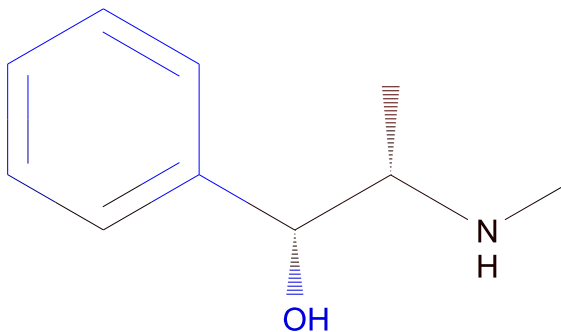C<sub>10</sub>H<sub>15</sub>NO

Molecular Weight: 165.232

ALogP: 1.234

Rotatable Bonds: 3

Acceptors: 2

Donors: 2

### Model Prediction

Prediction: 307

Unit: mg/kg\_body\_weight/day

Mahalanobis Distance: 9.27

Mahalanobis Distance p-value: 0.185

Mahalanobis Distance: The Mahalanobis distance (MD) is a generalization of the Euclidean distance that accounts for correlations among the X properties. It is calculated as the distance to the center of the training data. The larger the MD, the less trustworthy the prediction.

Mahalanobis Distance p-value: The p-value gives the fraction of training data with an MD greater than or equal to the one for the given sample, assuming normally distributed data. The smaller the p-value, the less trustworthy the prediction. For highly non-normal X properties (e.g., fingerprints), the MD p-value is wildly inaccurate.

### Structural Similar Compounds

| Name                        | 1-Acetyl-2-phenylhydrazine | 529     | 485     |
|-----------------------------|----------------------------|---------|---------|
| Structure                   |                            |         |         |
| Actual Endpoint (-log C)    | 3.46734                    | 3.96981 | 3.15601 |
| Predicted Endpoint (-log C) | 2.52008                    | 3.43178 | 3.43754 |
| Distance                    | 0.464                      | 0.469   | 0.497   |
| Reference                   | CPDB                       | CPDB    | CPDB    |

### Model Applicability

Unknown features are fingerprint features in the query molecule, but not found or appearing too infrequently in the training set.

1. All properties and OPS components are within expected ranges.
2. Unknown ECFP\_2 feature: -222940837: [\*]C([\*])[C@H](O)[c](:[\*]):[\*]
3. Unknown ECFP\_2 feature: -871548073: [\*]N[C@@H](C)C([\*])[\*]
4. Unknown ECFP\_2 feature: 1336634178: [\*]C([\*])NC

### Feature Contribution

#### Top features for positive contribution

| Fingerprint | Bit/Smiles | Feature Structure                 | Score  |
|-------------|------------|-----------------------------------|--------|
| ECFP_6      | 734603939  | <p>AND Enantiomer</p> <p>[*]C</p> | 0.0424 |

|                                        |                   |                                                                                                                                                  |              |
|----------------------------------------|-------------------|--------------------------------------------------------------------------------------------------------------------------------------------------|--------------|
| ECFP_6                                 | 864518973         | <p>AND Enantiomer</p> 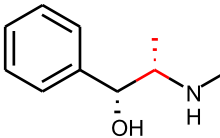 <p>[*]C([*])C</p>                      | 0.0366       |
| ECFP_6                                 | -1897341097       | <p>AND Enantiomer</p>  <p>[*]N[*]</p>                         | 0.0284       |
| Top Features for negative contribution |                   |                                                                                                                                                  |              |
| <b>Fingerprint</b>                     | <b>Bit/Smiles</b> | <b>Feature Structure</b>                                                                                                                         | <b>Score</b> |
| ECFP_6                                 | 1996767644        | <p>AND Enantiomer</p>  <p>[*][c](:[*]):[cH]:[cH<br/>]:[*]</p> | -0.251       |
| ECFP_6                                 | 642810091         | <p>AND Enantiomer</p>  <p>[*][c](:[*]):[*]</p>              | -0.247       |
| ECFP_6                                 | -182236392        | <p>AND Enantiomer</p>  <p>[*]:[cH]:[*]</p>                  | -0.232       |



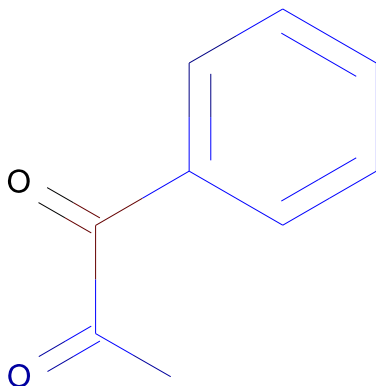

$C_9H_8O_2$

Molecular Weight: 148.159

ALogP: 1.446

Rotatable Bonds: 2

Acceptors: 2

Donors: 0

## Model Prediction

Prediction: 734

Unit: mg/kg\_body\_weight/day

Mahalanobis Distance: 9.35

Mahalanobis Distance p-value: 0.159

Mahalanobis Distance: The Mahalanobis distance (MD) is a generalization of the Euclidean distance that accounts for correlations among the X properties. It is calculated as the distance to the center of the training data. The larger the MD, the less trustworthy the prediction.

Mahalanobis Distance p-value: The p-value gives the fraction of training data with an MD greater than or equal to the one for the given sample, assuming normally distributed data. The smaller the p-value, the less trustworthy the prediction. For highly non-normal X properties (e.g., fingerprints), the MD p-value is wildly inaccurate.

## Structural Similar Compounds

| Name                        | Benzyl acetate | Nitrobenzene | Benzaldehyde |
|-----------------------------|----------------|--------------|--------------|
| Structure                   |                |              |              |
| Actual Endpoint (-log C)    | 2.01823        | 2.619        | 1.85262      |
| Predicted Endpoint (-log C) | 2.37939        | 2.53727      | 2.81264      |
| Distance                    | 0.417          | 0.464        | 0.500        |
| Reference                   | CPDB           | CPDB         | CPDB         |

## Model Applicability

Unknown features are fingerprint features in the query molecule, but not found or appearing too infrequently in the training set.

1. All properties and OPS components are within expected ranges.
2. Unknown ECFP\_2 feature: 1432101658: [\*]C(=[\*])C(=O)[c](:[\*]):[\*]
3. Unknown ECFP\_2 feature: -472613004: [\*]C(=[\*])C(=O)C

## Feature Contribution

### Top features for positive contribution

| Fingerprint | Bit/Smiles | Feature Structure                                  | Score |
|-------------|------------|----------------------------------------------------|-------|
| ECFP_6      | -175146122 | <br><chem>[*]C(=[*])[c](:[cH]:[*]):[cH]:[*]</chem> | 0.107 |

|                                        |            |                                                                                                                        |        |
|----------------------------------------|------------|------------------------------------------------------------------------------------------------------------------------|--------|
| ECFP_6                                 | 734603939  | 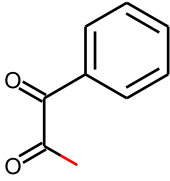<br>[*]C                            | 0.0424 |
| ECFP_6                                 | 1571214559 | <br>[*]1:[cH]:[cH]:[cH]:[cH]:[cH]:1 | 0.0145 |
| Top Features for negative contribution |            |                                                                                                                        |        |
| Fingerprint                            | Bit/Smiles | Feature Structure                                                                                                      | Score  |
| ECFP_6                                 | 1996767644 | <br>[*][c](:[*]):[cH]:[cH]:[*]      | -0.251 |
| ECFP_6                                 | 642810091  | <br>[*][c](:[*]):[*]              | -0.247 |
| ECFP_6                                 | -182236392 | <br>[*]:[cH]:[*]                  | -0.232 |





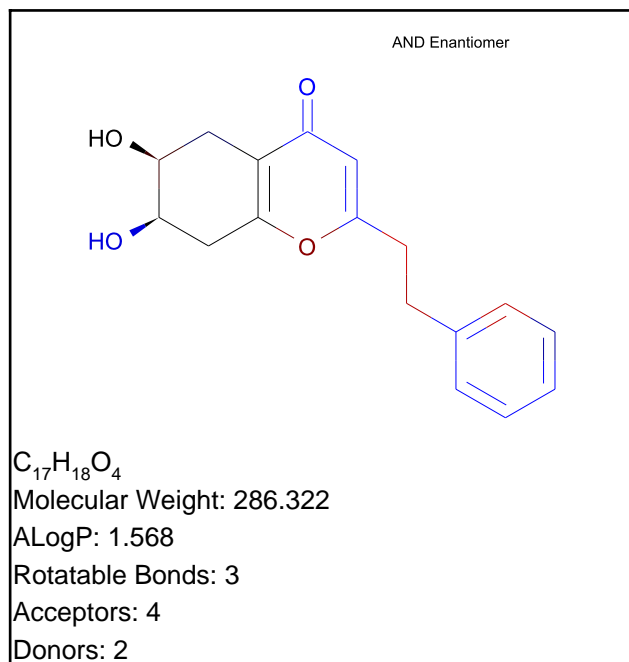

### Model Prediction

Prediction: 71.2

Unit: mg/kg\_body\_weight/day

Mahalanobis Distance: 9.68

Mahalanobis Distance p-value: 0.0794

Mahalanobis Distance: The Mahalanobis distance (MD) is a generalization of the Euclidean distance that accounts for correlations among the X properties. It is calculated as the distance to the center of the training data. The larger the MD, the less trustworthy the prediction.

Mahalanobis Distance p-value: The p-value gives the fraction of training data with an MD greater than or equal to the one for the given sample, assuming normally distributed data. The smaller the p-value, the less trustworthy the prediction. For highly non-normal X properties (e.g., fingerprints), the MD p-value is wildly inaccurate.

### Structural Similar Compounds

| Name                        | C.I. disperse yellow 3                                                              | Phenobarbital s                                                                     | 581                                                                                 |
|-----------------------------|-------------------------------------------------------------------------------------|-------------------------------------------------------------------------------------|-------------------------------------------------------------------------------------|
| Structure                   | 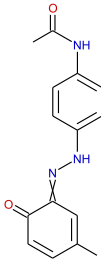 |  |  |
| Actual Endpoint (-log C)    | 2.42163                                                                             | 4.49846                                                                             | 3.89128                                                                             |
| Predicted Endpoint (-log C) | 3.11116                                                                             | 3.14828                                                                             | 3.31105                                                                             |
| Distance                    | 0.586                                                                               | 0.592                                                                               | 0.633                                                                               |
| Reference                   | CPDB                                                                                | CPDB                                                                                | CPDB                                                                                |

### Model Applicability

Unknown features are fingerprint features in the query molecule, but not found or appearing too infrequently in the training set.

1. All properties and OPS components are within expected ranges.
2. Unknown ECFP\_2 feature: 1650944136: [\*]CC(=C([\*]))O[\*]

### Feature Contribution

#### Top features for positive contribution

| Fingerprint | Bit/Smiles | Feature Structure                                                                                                                                                                               | Score |
|-------------|------------|-------------------------------------------------------------------------------------------------------------------------------------------------------------------------------------------------|-------|
| ECFP_6      | 1559650422 | <p style="text-align: center;">AND Enantiomer</p> 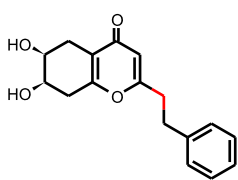 <p style="text-align: center;"><chem>[*]C[*]</chem></p> | 0.203 |

|                                        |             |                                                                                                                                               |        |
|----------------------------------------|-------------|-----------------------------------------------------------------------------------------------------------------------------------------------|--------|
| ECFP_6                                 | -2024255407 | <p>AND Enantiomer</p> 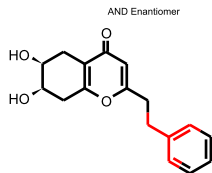 <p>[*]C[c](:[cH]:[*]):[cH]:[*]</p>  | 0.172  |
| ECFP_6                                 | 683445015   | <p>AND Enantiomer</p>  <p>[*]O[*]</p>                      | 0.136  |
| Top Features for negative contribution |             |                                                                                                                                               |        |
| Fingerprint                            | Bit/Smiles  | Feature Structure                                                                                                                             | Score  |
| ECFP_6                                 | 2106656448  | <p>AND Enantiomer</p>  <p>[*]C(=O)[*]</p>                  | -0.275 |
| ECFP_6                                 | 1996767644  | <p>AND Enantiomer</p>  <p>[*][c](:[*]):[cH]:[cH]:[*]</p> | -0.251 |
| ECFP_6                                 | 642810091   | <p>AND Enantiomer</p>  <p>[*][c](:[*]):[*]</p>           | -0.247 |



AND Enantiomer

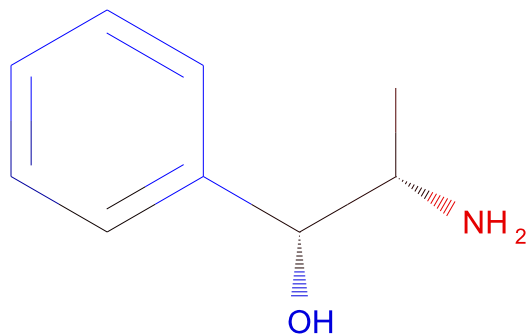 $C_9H_{13}NO$ 

Molecular Weight: 151.206

ALogP: 0.802

Rotatable Bonds: 2

Acceptors: 2

Donors: 2

## Model Prediction

Prediction: 209

Unit: mg/kg\_body\_weight/day

Mahalanobis Distance: 10.1

Mahalanobis Distance p-value: 0.0262

Mahalanobis Distance: The Mahalanobis distance (MD) is a generalization of the Euclidean distance that accounts for correlations among the X properties. It is calculated as the distance to the center of the training data. The larger the MD, the less trustworthy the prediction.

Mahalanobis Distance p-value: The p-value gives the fraction of training data with an MD greater than or equal to the one for the given sample, assuming normally distributed data. The smaller the p-value, the less trustworthy the prediction. For highly non-normal X properties (e.g., fingerprints), the MD p-value is wildly inaccurate.

## Structural Similar Compounds

| Name                        | 485     | Benzoyl hydrazine | 529     |
|-----------------------------|---------|-------------------|---------|
| Structure                   |         |                   |         |
| Actual Endpoint (-log C)    | 3.15601 | 4.1522            | 3.96981 |
| Predicted Endpoint (-log C) | 3.43754 | 3.02635           | 3.43178 |
| Distance                    | 0.461   | 0.470             | 0.477   |
| Reference                   | CPDB    | CPDB              | CPDB    |

## Model Applicability

Unknown features are fingerprint features in the query molecule, but not found or appearing too infrequently in the training set.

1. All properties and OPS components are within expected ranges.
2. Unknown ECFP\_2 feature: -222940837: [\*]C[\*])[C@H](O)[c](:[\*]):[\*]

## Feature Contribution

### Top features for positive contribution

| Fingerprint | Bit/Smiles | Feature Structure                 | Score |
|-------------|------------|-----------------------------------|-------|
| ECFP_6      | 1572579716 | <p>AND Enantiomer</p> <p>[*]N</p> | 0.225 |

|        |           |                                                                                                                             |        |
|--------|-----------|-----------------------------------------------------------------------------------------------------------------------------|--------|
| ECFP_6 | 734603939 | <p>AND Enantiomer</p> 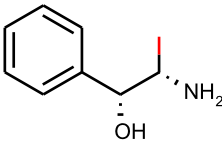 <p>[*]C</p>       | 0.0424 |
| ECFP_6 | 864518973 | <p>AND Enantiomer</p>  <p>[*]C([*])C</p> | 0.0366 |

### Top Features for negative contribution

| Fingerprint | Bit/Smiles | Feature Structure                                                                                                                           | Score  |
|-------------|------------|---------------------------------------------------------------------------------------------------------------------------------------------|--------|
| ECFP_6      | 1996767644 | <p>AND Enantiomer</p> 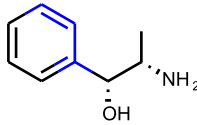 <p>[*][c](:[*]):[cH]:[cH]:[*]</p> | -0.251 |
| ECFP_6      | 642810091  | <p>AND Enantiomer</p>  <p>[*][c](:[*]):[*]</p>         | -0.247 |
| ECFP_6      | -182236392 | <p>AND Enantiomer</p>  <p>[*]:[cH]:[*]</p>             | -0.232 |



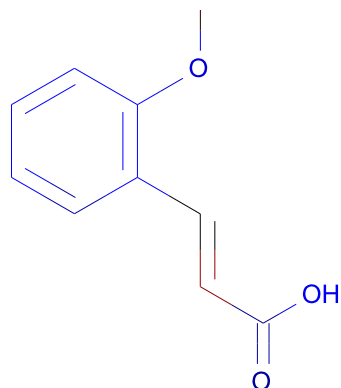

$C_{10}H_{10}O_3$

Molecular Weight: 178.185

ALogP: 1.911

Rotatable Bonds: 3

Acceptors: 3

Donors: 1

## Model Prediction

Prediction: 896

Unit: mg/kg\_body\_weight/day

Mahalanobis Distance: 9.81

Mahalanobis Distance p-value: 0.0587

Mahalanobis Distance: The Mahalanobis distance (MD) is a generalization of the Euclidean distance that accounts for correlations among the X properties. It is calculated as the distance to the center of the training data. The larger the MD, the less trustworthy the prediction.

Mahalanobis Distance p-value: The p-value gives the fraction of training data with an MD greater than or equal to the one for the given sample, assuming normally distributed data. The smaller the p-value, the less trustworthy the prediction. For highly non-normal X properties (e.g., fingerprints), the MD p-value is wildly inaccurate.

## Structural Similar Compounds

| Name                        | o-Ethoxybenzamide | o-Nitroanisole | 153     |
|-----------------------------|-------------------|----------------|---------|
| Structure                   |                   |                |         |
| Actual Endpoint (-log C)    | 2.50786           | 2.93466        | 2.10547 |
| Predicted Endpoint (-log C) | 2.72346           | 2.36925        | 2.33861 |
| Distance                    | 0.479             | 0.499          | 0.507   |
| Reference                   | CPDB              | CPDB           | CPDB    |

## Model Applicability

Unknown features are fingerprint features in the query molecule, but not found or appearing too infrequently in the training set.

1. All properties and OPS components are within expected ranges.

## Feature Contribution

### Top features for positive contribution

| Fingerprint | Bit/Smiles  | Feature Structure | Score |
|-------------|-------------|-------------------|-------|
| ECFP_6      | -1925046727 | <br>[*]C=[*]      | 0.145 |



| ECFP_6                                 | 734603939  | 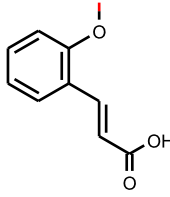<br>[*]C                       | 0.0424 |
|----------------------------------------|------------|-------------------------------------------------------------------------------------------------------------------|--------|
| ECFP_6                                 | 1307307440 | <br>[*]:[c](:[*])OC            | 0.0156 |
| Top Features for negative contribution |            |                                                                                                                   |        |
| Fingerprint                            | Bit/Smiles | Feature Structure                                                                                                 | Score  |
| ECFP_6                                 | 1996767644 | <br>[*][c](:[*]):[cH]:[cH]:[*] | -0.251 |
| ECFP_6                                 | 642810091  | <br>[*][c](:[*]):[*]          | -0.247 |
| ECFP_6                                 | 182236392  | <br>[*]:[cH]:[*]             | -0.232 |



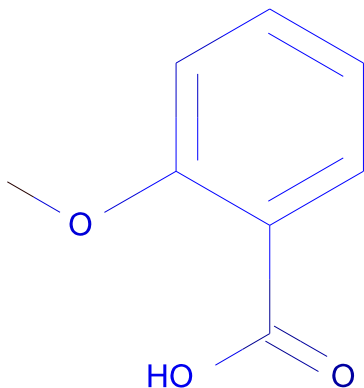C<sub>8</sub>H<sub>8</sub>O<sub>3</sub>

Molecular Weight: 152.147

ALogP: 1.443

Rotatable Bonds: 2

Acceptors: 3

Donors: 1

### Model Prediction

Prediction: 1.15e+003

Unit: mg/kg\_body\_weight/day

Mahalanobis Distance: 9.04

Mahalanobis Distance p-value: 0.273

Mahalanobis Distance: The Mahalanobis distance (MD) is a generalization of the Euclidean distance that accounts for correlations among the X properties. It is calculated as the distance to the center of the training data. The larger the MD, the less trustworthy the prediction.

Mahalanobis Distance p-value: The p-value gives the fraction of training data with an MD greater than or equal to the one for the given sample, assuming normally distributed data. The smaller the p-value, the less trustworthy the prediction. For highly non-normal X properties (e.g., fingerprints), the MD p-value is wildly inaccurate.

### Structural Similar Compounds

| Name                        | o-Ethoxybenzamide | 153     | o-Nitroanisole |
|-----------------------------|-------------------|---------|----------------|
| Structure                   |                   |         |                |
| Actual Endpoint (-log C)    | 2.50786           | 2.10547 | 2.93466        |
| Predicted Endpoint (-log C) | 2.72346           | 2.33861 | 2.36925        |
| Distance                    | 0.417             | 0.426   | 0.461          |
| Reference                   | CPDB              | CPDB    | CPDB           |

### Model Applicability

Unknown features are fingerprint features in the query molecule, but not found or appearing too infrequently in the training set.

1. All properties and OPS components are within expected ranges.

### Feature Contribution

#### Top features for positive contribution

| Fingerprint | Bit/Smiles | Feature Structure | Score  |
|-------------|------------|-------------------|--------|
| ECFP_6      | 734603939  | <br>[*]C          | 0.0424 |

| ECFP_6                                 | 1307307440 | 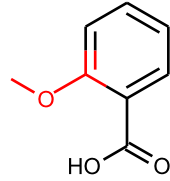<br><chem>[*]:[c](:[*])OC</chem>            | 0.0156 |
|----------------------------------------|------------|--------------------------------------------------------------------------------------------------------------------------------|--------|
| Top Features for negative contribution |            |                                                                                                                                |        |
| Fingerprint                            | Bit/Smiles | Feature Structure                                                                                                              | Score  |
| ECFP_6                                 | 1996767644 | <br><chem>[*][c](:[*]):[cH]:[cH]:[*]</chem> | -0.251 |
| ECFP_6                                 | 642810091  | <br><chem>[*][c](:[*]):[*]</chem>           | -0.247 |
| ECFP_6                                 | 182236392  | <br><chem>[*]:[cH]:[*]</chem>              | -0.232 |

AND Enantiomer

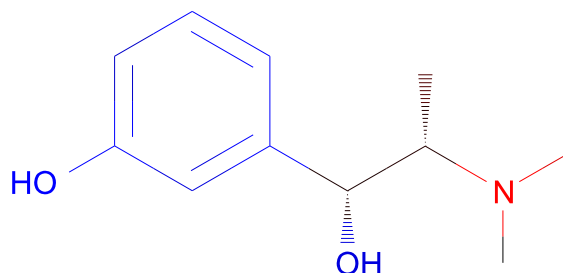C<sub>11</sub>H<sub>17</sub>NO<sub>2</sub>

Molecular Weight: 195.258

ALogP: 1.528

Rotatable Bonds: 3

Acceptors: 3

Donors: 2

## Model Prediction

Prediction: 145

Unit: mg/kg\_body\_weight/day

Mahalanobis Distance: 11.5

Mahalanobis Distance p-value: 0.000229

Mahalanobis Distance: The Mahalanobis distance (MD) is a generalization of the Euclidean distance that accounts for correlations among the X properties. It is calculated as the distance to the center of the training data. The larger the MD, the less trustworthy the prediction.

Mahalanobis Distance p-value: The p-value gives the fraction of training data with an MD greater than or equal to the one for the given sample, assuming normally distributed data. The smaller the p-value, the less trustworthy the prediction. For highly non-normal X properties (e.g., fingerprints), the MD p-value is wildly inaccurate.

## Structural Similar Compounds

| Name                        | 3-Hydroxy-p-butyrophenetide | 1-Acetyl-2-phenylhydrazine | 529     |
|-----------------------------|-----------------------------|----------------------------|---------|
| Structure                   |                             |                            |         |
| Actual Endpoint (-log C)    | 1.6061                      | 3.46734                    | 3.96981 |
| Predicted Endpoint (-log C) | 2.97088                     | 2.52008                    | 3.43178 |
| Distance                    | 0.559                       | 0.562                      | 0.571   |
| Reference                   | CPDB                        | CPDB                       | CPDB    |

## Model Applicability

Unknown features are fingerprint features in the query molecule, but not found or appearing too infrequently in the training set.

1. All properties and OPS components are within expected ranges.
2. Unknown ECFP\_2 feature: -222940837: [\*]C([\*])[C@H](O)[c](:[\*]):[\*]
3. Unknown ECFP\_2 feature: -1280034494: [\*]C([\*])[C@H](C)N([\*])[\*]
4. Unknown ECFP\_2 feature: 1064495017: [\*]C([\*])N(C)C

## Feature Contribution

### Top features for positive contribution

| Fingerprint | Bit/Smiles  | Feature Structure                         | Score |
|-------------|-------------|-------------------------------------------|-------|
| ECFP_6      | -1072294614 | <p>AND Enantiomer</p> <p>[*]N([*])[*]</p> | 0.428 |

|                                        |                   |                                                                                                                                                      |              |
|----------------------------------------|-------------------|------------------------------------------------------------------------------------------------------------------------------------------------------|--------------|
| ECFP_6                                 | 865379614         | <p>AND Enantiomer</p> 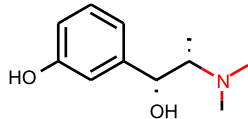 <p>[*]N([*])C</p>                          | 0.219        |
| ECFP_6                                 | 734603939         | <p>AND Enantiomer</p>  <p>[*]C</p>                                | 0.0424       |
| Top Features for negative contribution |                   |                                                                                                                                                      |              |
| <b>Fingerprint</b>                     | <b>Bit/Smiles</b> | <b>Feature Structure</b>                                                                                                                             | <b>Score</b> |
| ECFP_6                                 | 2019062761        | <p>AND Enantiomer</p>  <p>[*]:[c](:[*])O</p>                      | -0.258       |
| ECFP_6                                 | 1996767644        | <p>AND Enantiomer</p>  <p>[*][c](:[*]):[cH]:[cH]<br/>[:[*]]</p> | -0.251       |
| ECFP_6                                 | 642810091         | <p>AND Enantiomer</p>  <p>[*][c](:[*]):[*]</p>                  | -0.247       |



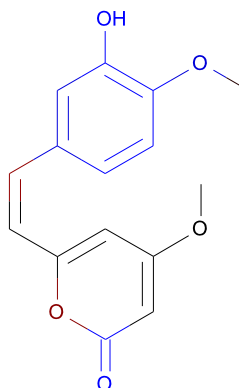

$C_{15}H_{14}O_5$

Molecular Weight: 274.269

ALogP: 1.969

Rotatable Bonds: 4

Acceptors: 5

Donors: 1

## Model Prediction

Prediction: 588

Unit: mg/kg\_body\_weight/day

Mahalanobis Distance: 9.03

Mahalanobis Distance p-value: 0.276

Mahalanobis Distance: The Mahalanobis distance (MD) is a generalization of the Euclidean distance that accounts for correlations among the X properties. It is calculated as the distance to the center of the training data. The larger the MD, the less trustworthy the prediction.

Mahalanobis Distance p-value: The p-value gives the fraction of training data with an MD greater than or equal to the one for the given sample, assuming normally distributed data. The smaller the p-value, the less trustworthy the prediction. For highly non-normal X properties (e.g., fingerprints), the MD p-value is wildly inaccurate.

## Structural Similar Compounds

| Name                        | C.I. disperse yellow 3 | Ciprofibrate | 581     |
|-----------------------------|------------------------|--------------|---------|
| Structure                   |                        |              |         |
| Actual Endpoint (-log C)    | 2.42163                | 4.66874      | 3.89128 |
| Predicted Endpoint (-log C) | 3.11116                | 3.1937       | 3.31105 |
| Distance                    | 0.613                  | 0.623        | 0.627   |
| Reference                   | CPDB                   | CPDB         | CPDB    |

## Model Applicability

Unknown features are fingerprint features in the query molecule, but not found or appearing too infrequently in the training set.

1. All properties and OPS components are within expected ranges.
2. Unknown ECFP\_2 feature: -1053980253: [\*]O\C(=C[\*])\C=[\*]
3. Unknown ECFP\_2 feature: -444332269: [\*]O\C(=C[\*])\C=[\*]

## Feature Contribution

### Top features for positive contribution

| Fingerprint | Bit/Smiles  | Feature Structure         | Score |
|-------------|-------------|---------------------------|-------|
| ECFP_6      | -1925046727 | <br><chem>[*]C=[*]</chem> | 0.145 |



|                                        |            |                                                                                                                                       |        |
|----------------------------------------|------------|---------------------------------------------------------------------------------------------------------------------------------------|--------|
| ECFP_6                                 | 683445015  | 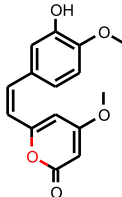<br><chem>[*]O[*]</chem>                           | 0.136  |
| ECFP_6                                 | 734603939  | <br><chem>[*]C</chem>                              | 0.0424 |
| Top Features for negative contribution |            |                                                                                                                                       |        |
| Fingerprint                            | Bit/Smiles | Feature Structure                                                                                                                     | Score  |
| ECFP_6                                 | 2106656448 | <br><chem>[*]C(=O)[*]</chem>                       | -0.275 |
| ECFP_6                                 | 2019062761 | <br><chem>[*]:[c](:[*])O</chem>                  | -0.258 |
| ECFP_6                                 | 1996767644 | <br><chem>[*][c](:[*]):[cH]:[cH]:[cH]:[*]</chem> | -0.251 |



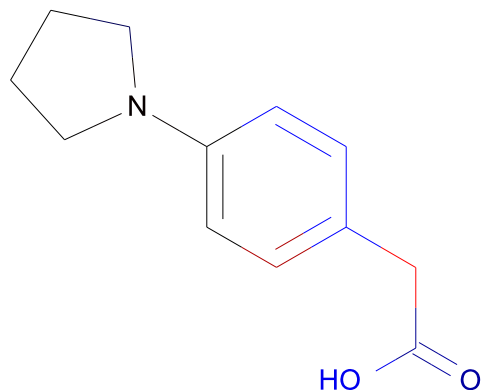

$C_{12}H_{15}NO_2$

Molecular Weight: 205.253

ALogP: 2.117

Rotatable Bonds: 3

Acceptors: 3

Donors: 1

## Model Prediction

Prediction: 86.3

Unit: mg/kg\_body\_weight/day

Mahalanobis Distance: 9.43

Mahalanobis Distance p-value: 0.135

Mahalanobis Distance: The Mahalanobis distance (MD) is a generalization of the Euclidean distance that accounts for correlations among the X properties. It is calculated as the distance to the center of the training data. The larger the MD, the less trustworthy the prediction.

Mahalanobis Distance p-value: The p-value gives the fraction of training data with an MD greater than or equal to the one for the given sample, assuming normally distributed data. The smaller the p-value, the less trustworthy the prediction. For highly non-normal X properties (e.g., fingerprints), the MD p-value is wildly inaccurate.

## Structural Similar Compounds

| Name                        | 666     | 1'-Hydroxysafrole | Ciprofibrate |
|-----------------------------|---------|-------------------|--------------|
| Structure                   |         |                   |              |
| Actual Endpoint (-log C)    | 3.36793 | 3.39839           | 4.66874      |
| Predicted Endpoint (-log C) | 2.71924 | 3.24585           | 3.1937       |
| Distance                    | 0.507   | 0.533             | 0.561        |
| Reference                   | CPDB    | CPDB              | CPDB         |

## Model Applicability

Unknown features are fingerprint features in the query molecule, but not found or appearing too infrequently in the training set.

1. OPS PC23 out of range. Value: 3.4508. Training min, max, SD, explained variance: -2.6901, 3.3252, 1.05, 0.0138.
2. Unknown ECFP\_2 feature: 1951894094: [\*]:[c](:[\*])N1C[\*][\*]C1

## Feature Contribution

### Top features for positive contribution

| Fingerprint | Bit/Smiles | Feature Structure | Score |
|-------------|------------|-------------------|-------|
| ECFP_6      | 1559650422 | <br>[*]C[*]       | 0.203 |

|                                        |             |                                                                                                                                 |         |
|----------------------------------------|-------------|---------------------------------------------------------------------------------------------------------------------------------|---------|
| ECFP_6                                 | -2024255407 | 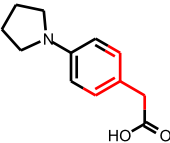<br><chem>[*]C[c](:[cH]:[*]):[cH]:[*]</chem> | 0.172   |
| ECFP_6                                 | 670515721   | <br><chem>[*]N([*])[*]</chem>                | 0.00735 |
| Top Features for negative contribution |             |                                                                                                                                 |         |
| Fingerprint                            | Bit/Smiles  | Feature Structure                                                                                                               | Score   |
| ECFP_6                                 | 1996767644  | <br><chem>[*][c](:[*]):[cH]:[cH]:[*]</chem>  | -0.251  |
| ECFP_6                                 | 642810091   | <br><chem>[*][c](:[*]):[*]</chem>          | -0.247  |
| ECFP_6                                 | -182236392  | <br><chem>[*]:[cH]:[*]</chem>              | -0.232  |



AND Enantiomer

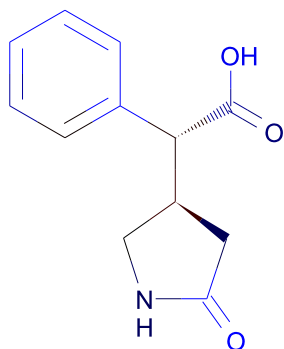C<sub>12</sub>H<sub>13</sub>NO<sub>3</sub>

Molecular Weight: 219.237

ALogP: 0.621

Rotatable Bonds: 3

Acceptors: 3

Donors: 2

### Model Prediction

Prediction: 1.02e+003

Unit: mg/kg\_body\_weight/day

Mahalanobis Distance: 9.84

Mahalanobis Distance p-value: 0.0543

Mahalanobis Distance: The Mahalanobis distance (MD) is a generalization of the Euclidean distance that accounts for correlations among the X properties. It is calculated as the distance to the center of the training data. The larger the MD, the less trustworthy the prediction.

Mahalanobis Distance p-value: The p-value gives the fraction of training data with an MD greater than or equal to the one for the given sample, assuming normally distributed data. The smaller the p-value, the less trustworthy the prediction. For highly non-normal X properties (e.g., fingerprints), the MD p-value is wildly inaccurate.

### Structural Similar Compounds

| Name                        | Phenobarbital s | Primidone | 3-Amino-4-ethoxyacetanilide |
|-----------------------------|-----------------|-----------|-----------------------------|
| Structure                   |                 |           |                             |
| Actual Endpoint (-log C)    | 4.49846         | 3.92232   | 1.97235                     |
| Predicted Endpoint (-log C) | 3.14828         | 3.00875   | 2.44449                     |
| Distance                    | 0.499           | 0.505     | 0.576                       |
| Reference                   | CPDB            | CPDB      | CPDB                        |

### Model Applicability

Unknown features are fingerprint features in the query molecule, but not found or appearing too infrequently in the training set.

1. All properties and OPS components are within expected ranges.
2. Unknown ECFP\_2 feature: -858846751: [\*]C([\*])C1C[\*][\*]C1
3. Unknown ECFP\_2 feature: -1457159889: [\*][C@H]1[\*][\*]NC1

### Feature Contribution

#### Top features for positive contribution

| Fingerprint | Bit/Smiles | Feature Structure                         | Score  |
|-------------|------------|-------------------------------------------|--------|
| ECFP_6      | -167460056 | <p>AND Enantiomer</p> <p>[*]C([*])[*]</p> | 0.0596 |

|                                        |             |                                                                                                                                                       |        |
|----------------------------------------|-------------|-------------------------------------------------------------------------------------------------------------------------------------------------------|--------|
| ECFP_6                                 | -1910270391 | <p>AND Enantiomer</p> 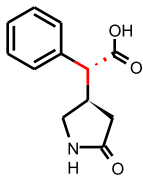 <p>[*]C([*])[*]</p>                         | 0.0279 |
| ECFP_6                                 | 1571214559  | <p>AND Enantiomer</p>  <p>[*]1:[cH]:[cH]:[cH]:[cH]:[cH]:[cH]:1</p> | 0.0145 |
| Top Features for negative contribution |             |                                                                                                                                                       |        |
| Fingerprint                            | Bit/Smiles  | Feature Structure                                                                                                                                     | Score  |
| ECFP_6                                 | 2106656448  | <p>AND Enantiomer</p>  <p>[*]C(=O)[*]</p>                          | -0.275 |
| ECFP_6                                 | 1996767644  | <p>AND Enantiomer</p>  <p>[*][c](:[*]):[cH]:[cH]:[*]</p>         | -0.251 |
| ECFP_6                                 | 642810091   | <p>AND Enantiomer</p>  <p>[*][c](:[*]):[*]</p>                   | -0.247 |





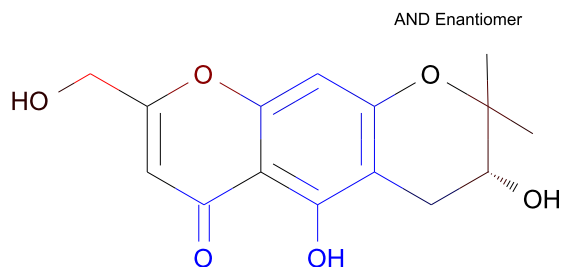

$C_{15}H_{16}O_6$

Molecular Weight: 292.284

ALogP: 0.901

Rotatable Bonds: 1

Acceptors: 6

Donors: 3

## Model Prediction

Prediction: 31

Unit: mg/kg\_body\_weight/day

Mahalanobis Distance: 9.95

Mahalanobis Distance p-value: 0.0405

Mahalanobis Distance: The Mahalanobis distance (MD) is a generalization of the Euclidean distance that accounts for correlations among the X properties. It is calculated as the distance to the center of the training data. The larger the MD, the less trustworthy the prediction.

Mahalanobis Distance p-value: The p-value gives the fraction of training data with an MD greater than or equal to the one for the given sample, assuming normally distributed data. The smaller the p-value, the less trustworthy the prediction. For highly non-normal X properties (e.g., fingerprints), the MD p-value is wildly inaccurate.

## Structural Similar Compounds

| Name                        | Riddelliine | Zearalenone | 71      |
|-----------------------------|-------------|-------------|---------|
| Structure                   |             |             |         |
| Actual Endpoint (-log C)    | 5.24883     | 3.91186     | 3.91186 |
| Predicted Endpoint (-log C) | 4.57392     | 3.54452     | 3.54452 |
| Distance                    | 0.672       | 0.706       | 0.706   |
| Reference                   | CPDB        | CPDB        | CPDB    |

## Model Applicability

Unknown features are fingerprint features in the query molecule, but not found or appearing too infrequently in the training set.

1. All properties and OPS components are within expected ranges.
2. Unknown ECFP\_2 feature: 1778376725: [\*]OC(C)(C)C([\*])[\*]

## Feature Contribution

### Top features for positive contribution

| Fingerprint | Bit/Smiles | Feature Structure        | Score |
|-------------|------------|--------------------------|-------|
| ECFP_6      | 1559650422 | <br><chem>[*]C[*]</chem> | 0.203 |

|                                        |            |                                                                                                                                     |        |
|----------------------------------------|------------|-------------------------------------------------------------------------------------------------------------------------------------|--------|
| ECFP_6                                 | 683445015  | <p>AND Enantiomer</p> 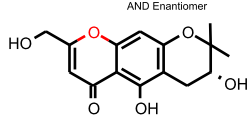 <p>[*]O[*]</p>            | 0.136  |
| ECFP_6                                 | 657586427  | <p>AND Enantiomer</p>  <p>[*]C([*])([*])[*]</p>  | 0.0789 |
| Top Features for negative contribution |            |                                                                                                                                     |        |
| Fingerprint                            | Bit/Smiles | Feature Structure                                                                                                                   | Score  |
| ECFP_6                                 | 2106656448 | <p>AND Enantiomer</p>  <p>[*]C(=O)[*]</p>        | -0.275 |
| ECFP_6                                 | 2019062761 | <p>AND Enantiomer</p>  <p>[*]:[c](:[*])O</p>   | -0.258 |
| ECFP_6                                 | 642810091  | <p>AND Enantiomer</p>  <p>[*][c](:[*]):[*]</p> | -0.247 |



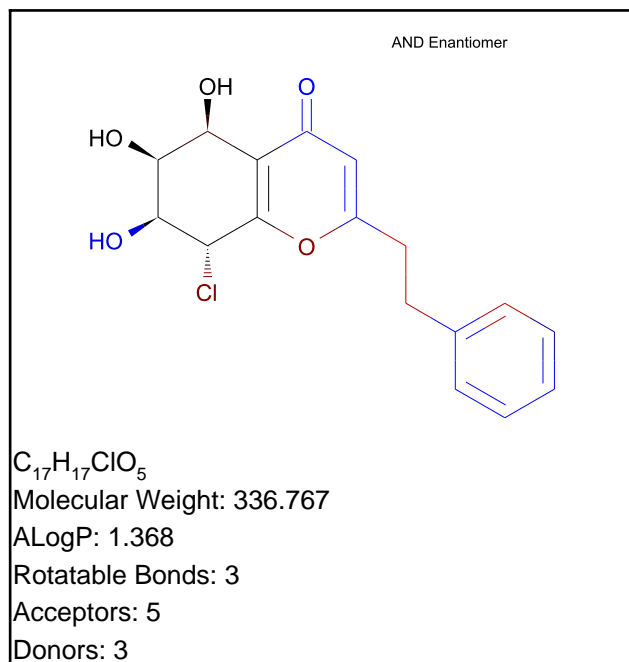

### Model Prediction

Prediction: 30.3

Unit: mg/kg\_body\_weight/day

Mahalanobis Distance: 11.2

Mahalanobis Distance p-value: 0.000788

Mahalanobis Distance: The Mahalanobis distance (MD) is a generalization of the Euclidean distance that accounts for correlations among the X properties. It is calculated as the distance to the center of the training data. The larger the MD, the less trustworthy the prediction.

Mahalanobis Distance p-value: The p-value gives the fraction of training data with an MD greater than or equal to the one for the given sample, assuming normally distributed data. The smaller the p-value, the less trustworthy the prediction. For highly non-normal X properties (e.g., fingerprints), the MD p-value is wildly inaccurate.

### Structural Similar Compounds

| Name                        | C.I. disperse yellow 3                                                              | 542                                                                                 | Ochratoxin A                                                                        |
|-----------------------------|-------------------------------------------------------------------------------------|-------------------------------------------------------------------------------------|-------------------------------------------------------------------------------------|
| Structure                   | 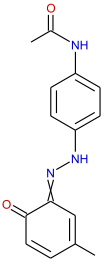 |  |  |
| Actual Endpoint (-log C)    | 2.42163                                                                             | 4.79932                                                                             | 4.79932                                                                             |
| Predicted Endpoint (-log C) | 3.11116                                                                             | 3.6353                                                                              | 3.6353                                                                              |
| Distance                    | 0.695                                                                               | 0.698                                                                               | 0.698                                                                               |
| Reference                   | CPDB                                                                                | CPDB                                                                                | CPDB                                                                                |

### Model Applicability

Unknown features are fingerprint features in the query molecule, but not found or appearing too infrequently in the training set.

1. All properties and OPS components are within expected ranges.
2. Unknown ECFP\_2 feature: 1795792463: [\*]C([\*])C(=C([\*])[\*])C(=[\*])[\*]
3. Unknown ECFP\_2 feature: -1567907747: [\*]C([\*])[C@@H](O)C(=[\*])[\*]
4. Unknown ECFP\_2 feature: -7106223: [\*]C([\*])[C@@H](Cl)C(=[\*])[\*]
5. Unknown ECFP\_2 feature: 1652274794: [\*]OC(=C([\*])[\*])C([\*])[\*]

### Feature Contribution

#### Top features for positive contribution

| Fingerprint | Bit/Smiles | Feature Structure                                                                                             | Score |
|-------------|------------|---------------------------------------------------------------------------------------------------------------|-------|
| ECFP_6      | 1559650422 | 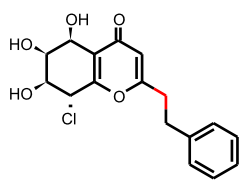<br><chem>[*]C[*]</chem> | 0.203 |

|                                        |             |                                                                                                                                               |        |
|----------------------------------------|-------------|-----------------------------------------------------------------------------------------------------------------------------------------------|--------|
| ECFP_6                                 | -2024255407 | <p>AND Enantiomer</p> 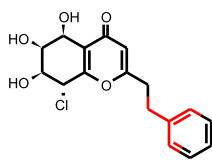 <p>[*]C[c](:[cH]:[*]):[cH]:[*]</p>  | 0.172  |
| ECFP_6                                 | 683445015   | <p>AND Enantiomer</p>  <p>[*]O[*]</p>                      | 0.136  |
| Top Features for negative contribution |             |                                                                                                                                               |        |
| Fingerprint                            | Bit/Smiles  | Feature Structure                                                                                                                             | Score  |
| ECFP_6                                 | 2106656448  | <p>AND Enantiomer</p>  <p>[*]C(=O)[*]</p>                  | -0.275 |
| ECFP_6                                 | 1996767644  | <p>AND Enantiomer</p>  <p>[*][c](:[*]):[cH]:[cH]:[*]</p> | -0.251 |
| ECFP_6                                 | 642810091   | <p>AND Enantiomer</p>  <p>[*][c](:[*]):[*]</p>           | -0.247 |



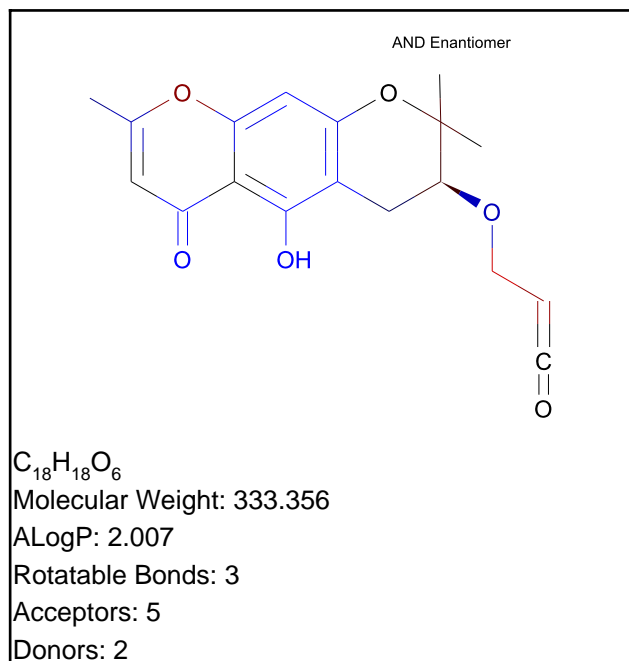

### Model Prediction

Prediction: 77.4

Unit: mg/kg\_body\_weight/day

Mahalanobis Distance: 11.4

Mahalanobis Distance p-value: 0.000344

Mahalanobis Distance: The Mahalanobis distance (MD) is a generalization of the Euclidean distance that accounts for correlations among the X properties. It is calculated as the distance to the center of the training data. The larger the MD, the less trustworthy the prediction.

Mahalanobis Distance p-value: The p-value gives the fraction of training data with an MD greater than or equal to the one for the given sample, assuming normally distributed data. The smaller the p-value, the less trustworthy the prediction. For highly non-normal X properties (e.g., fingerprints), the MD p-value is wildly inaccurate.

### Structural Similar Compounds

| Name                        | C.I. disperse yellow 3                                                              | 71                                                                                  | Zearalenone                                                                         |
|-----------------------------|-------------------------------------------------------------------------------------|-------------------------------------------------------------------------------------|-------------------------------------------------------------------------------------|
| Structure                   | 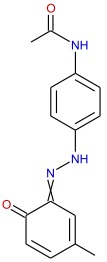 |  |  |
| Actual Endpoint (-log C)    | 2.42163                                                                             | 3.91186                                                                             | 3.91186                                                                             |
| Predicted Endpoint (-log C) | 3.11116                                                                             | 3.54452                                                                             | 3.54452                                                                             |
| Distance                    | 0.622                                                                               | 0.663                                                                               | 0.663                                                                               |
| Reference                   | CPDB                                                                                | CPDB                                                                                | CPDB                                                                                |

### Model Applicability

Unknown features are fingerprint features in the query molecule, but not found or appearing too infrequently in the training set.

1. All properties and OPS components are within expected ranges.
2. Unknown ECFP\_2 feature: -331149802: [\*]O\C(=C[\*])\C
3. Unknown ECFP\_2 feature: 1778376725: [\*]OC(C)(C)C[\*][\*]
4. Unknown ECFP\_2 feature: -1591590376: [\*]C=C=O
5. Unknown ECFP\_2 feature: -91536905: [\*]CC=C=O
6. Unknown ECFP\_2 feature: -1250019913: [\*]COC[\*][\*]

### Feature Contribution

#### Top features for positive contribution

| Fingerprint | Bit/Smiles | Feature Structure                                                                                                                                                                  | Score |
|-------------|------------|------------------------------------------------------------------------------------------------------------------------------------------------------------------------------------|-------|
| ECFP_6      | 1559650422 | <p style="text-align: center;">AND Enantiomer</p> 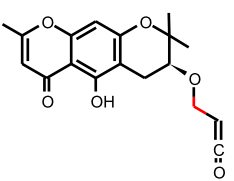 <p style="text-align: center;">[*]C[*]</p> | 0.203 |

|        |             |                                                                                                                           |       |
|--------|-------------|---------------------------------------------------------------------------------------------------------------------------|-------|
| ECFP_6 | -1925046727 | <p>AND Enantiomer</p> 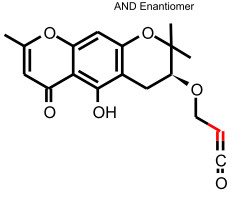 <p>[*]C=[*]</p> | 0.145 |
| ECFP_6 | 683445015   | <p>AND Enantiomer</p>  <p>[*]O[*]</p>  | 0.136 |

### Top Features for negative contribution

| Fingerprint | Bit/Smiles | Feature Structure                                                                                                                   | Score  |
|-------------|------------|-------------------------------------------------------------------------------------------------------------------------------------|--------|
| ECFP_6      | 2106656448 | <p>AND Enantiomer</p> 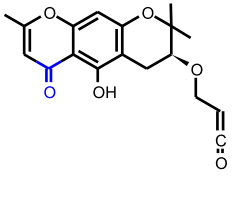 <p>[*]C(=O)[*]</p>        | -0.275 |
| ECFP_6      | 2019062761 | <p>AND Enantiomer</p>  <p>[*]:[c](:[*])O</p>   | -0.258 |
| ECFP_6      | 642810091  | <p>AND Enantiomer</p>  <p>[*][c](:[*]):[*]</p> | -0.247 |





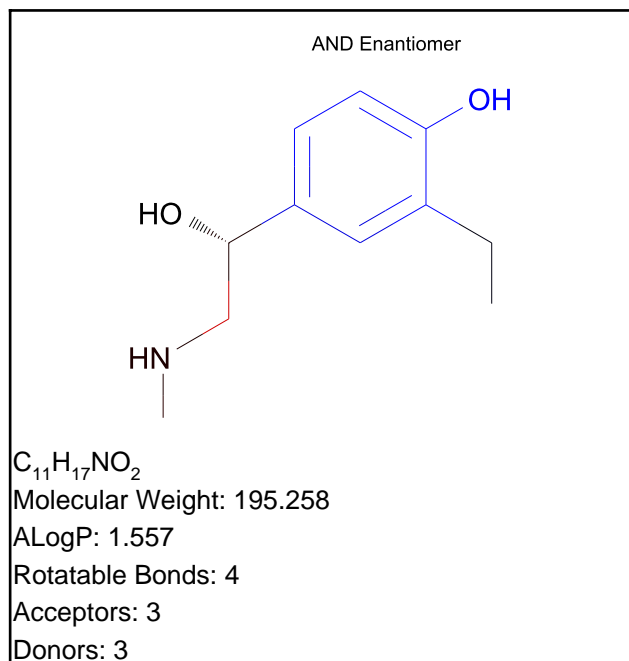

### Model Prediction

Prediction: 228

Unit: mg/kg\_body\_weight/day

Mahalanobis Distance: 8.84

Mahalanobis Distance p-value: 0.361

Mahalanobis Distance: The Mahalanobis distance (MD) is a generalization of the Euclidean distance that accounts for correlations among the X properties. It is calculated as the distance to the center of the training data. The larger the MD, the less trustworthy the prediction.

Mahalanobis Distance p-value: The p-value gives the fraction of training data with an MD greater than or equal to the one for the given sample, assuming normally distributed data. The smaller the p-value, the less trustworthy the prediction. For highly non-normal X properties (e.g., fingerprints), the MD p-value is wildly inaccurate.

### Structural Similar Compounds

| Name                        | N'-Acetyl-4-(hydroxy-methyl)phenyl-hydrazine                                        | 3-Hydroxy-p-butyrophenetide                                                         | 3-Amino-4-ethoxyacetanilide                                                         |
|-----------------------------|-------------------------------------------------------------------------------------|-------------------------------------------------------------------------------------|-------------------------------------------------------------------------------------|
| Structure                   | 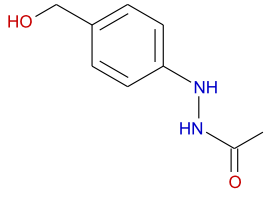 |  |  |
| Actual Endpoint (-log C)    | 2.87375                                                                             | 1.6061                                                                              | 1.97235                                                                             |
| Predicted Endpoint (-log C) | 3.15825                                                                             | 2.97088                                                                             | 2.44449                                                                             |
| Distance                    | 0.546                                                                               | 0.565                                                                               | 0.598                                                                               |
| Reference                   | CPDB                                                                                | CPDB                                                                                | CPDB                                                                                |

### Model Applicability

Unknown features are fingerprint features in the query molecule, but not found or appearing too infrequently in the training set.

1. All properties and OPS components are within expected ranges.
2. Unknown ECFP\_2 feature: -1537923023: [\*]C[C@H](O)[c](:[\*]):[\*]
3. Unknown ECFP\_2 feature: -652986225: [\*]NCC([\*])[\*]
4. Unknown ECFP\_2 feature: 493154328: [\*]CNC

### Feature Contribution

| Top features for positive contribution |            |                                                                                                                                         |       |
|----------------------------------------|------------|-----------------------------------------------------------------------------------------------------------------------------------------|-------|
| Fingerprint                            | Bit/Smiles | Feature Structure                                                                                                                       | Score |
| ECFP_6                                 | 1559650422 | <p>AND Enantiomer</p> 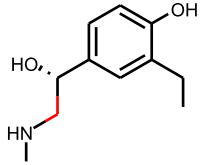 <p><chem>[*]C[*]</chem></p> | 0.203 |

|        |             |                                                                                                                          |        |
|--------|-------------|--------------------------------------------------------------------------------------------------------------------------|--------|
| ECFP_6 | 734603939   | <p>AND Enantiomer</p> 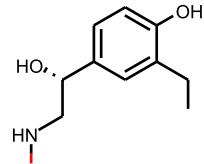 <p>[*]C</p>    | 0.0424 |
| ECFP_6 | -1897341097 | <p>AND Enantiomer</p>  <p>[*]N[*]</p> | 0.0284 |

### Top Features for negative contribution

| Fingerprint | Bit/Smiles | Feature Structure                                                                                                                             | Score  |
|-------------|------------|-----------------------------------------------------------------------------------------------------------------------------------------------|--------|
| ECFP_6      | 2019062761 | <p>AND Enantiomer</p> 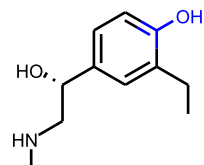 <p>[*]:[c](:[*])O</p>               | -0.258 |
| ECFP_6      | 1996767644 | <p>AND Enantiomer</p>  <p>[*][c](:[*]):[cH]:[cH]:[*]</p> | -0.251 |
| ECFP_6      | 642810091  | <p>AND Enantiomer</p>  <p>[*][c](:[*]):[*]</p>           | -0.247 |



AND Enantiomer

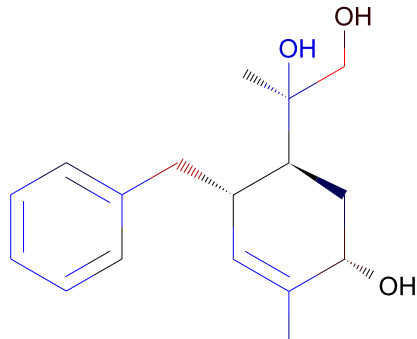 $C_{17}H_{24}O_3$ 

Molecular Weight: 276.371

ALogP: 2.165

Rotatable Bonds: 4

Acceptors: 3

Donors: 3

## Model Prediction

Prediction: 129

Unit: mg/kg\_body\_weight/day

Mahalanobis Distance: 10.9

Mahalanobis Distance p-value: 0.00175

Mahalanobis Distance: The Mahalanobis distance (MD) is a generalization of the Euclidean distance that accounts for correlations among the X properties. It is calculated as the distance to the center of the training data. The larger the MD, the less trustworthy the prediction.

Mahalanobis Distance p-value: The p-value gives the fraction of training data with an MD greater than or equal to the one for the given sample, assuming normally distributed data. The smaller the p-value, the less trustworthy the prediction. For highly non-normal X properties (e.g., fingerprints), the MD p-value is wildly inaccurate.

## Structural Similar Compounds

| Name                        | Phenobarbital s | C.I. disperse yellow 3 | Primidone |
|-----------------------------|-----------------|------------------------|-----------|
| Structure                   |                 |                        |           |
| Actual Endpoint (-log C)    | 4.49846         | 2.42163                | 3.92232   |
| Predicted Endpoint (-log C) | 3.14828         | 3.11116                | 3.00875   |
| Distance                    | 0.619           | 0.626                  | 0.640     |
| Reference                   | CPDB            | CPDB                   | CPDB      |

## Model Applicability

Unknown features are fingerprint features in the query molecule, but not found or appearing too infrequently in the training set.

1. OPS PC16 out of range. Value: -3.1092. Training min, max, SD, explained variance: -3.1026, 4.016, 1.245, 0.0193.
2. Unknown ECFP\_2 feature: -2097867909: [\*]C[C@H](O)C(=[\*])[\*]
3. Unknown ECFP\_2 feature: -327548242: [\*]C[C@@H](C([\*])[\*])C([\*])([\*])[\*]
4. Unknown ECFP\_2 feature: -1263967621: [\*]C[C@@H](C(=[\*])C([\*])[\*])
5. Unknown ECFP\_2 feature: 1280892564: [\*]C[C@](C)(O)C([\*])[\*]
6. Unknown ECFP\_2 feature: 771121623: [\*]C([\*])C[c](:[\*]):[\*]

## Feature Contribution

### Top features for positive contribution

| Fingerprint | Bit/Smiles | Feature Structure                    | Score |
|-------------|------------|--------------------------------------|-------|
| ECFP_6      | 1559650422 | <p>AND Enantiomer</p> <p>[*]C[*]</p> | 0.203 |

|                                        |             |                                                                                                                                              |        |
|----------------------------------------|-------------|----------------------------------------------------------------------------------------------------------------------------------------------|--------|
| ECFP_6                                 | -2024255407 | <p>AND Enantiomer</p> 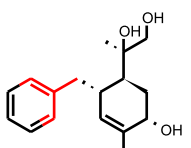 <p>[*]C[c](:[cH]:[*]):[cH]:[*]</p> | 0.172  |
| ECFP_6                                 | -167460056  | <p>AND Enantiomer</p>  <p>[*]C([*])[*]</p>                | 0.0596 |
| Top Features for negative contribution |             |                                                                                                                                              |        |
| Fingerprint                            | Bit/Smiles  | Feature Structure                                                                                                                            | Score  |
| ECFP_6                                 | 1996767644  | <p>AND Enantiomer</p>  <p>[*][c](:[*]):[cH]:[cH]:[*]</p>  | -0.251 |
| ECFP_6                                 | 642810091   | <p>AND Enantiomer</p>  <p>[*][c](:[*]):[*]</p>          | -0.247 |
| ECFP_6                                 | -182236392  | <p>AND Enantiomer</p>  <p>[*]:[cH]:[*]</p>              | -0.232 |



# Simeprevir

# TOPKAT\_Carcinogenic\_Potency\_TD50\_Mouse

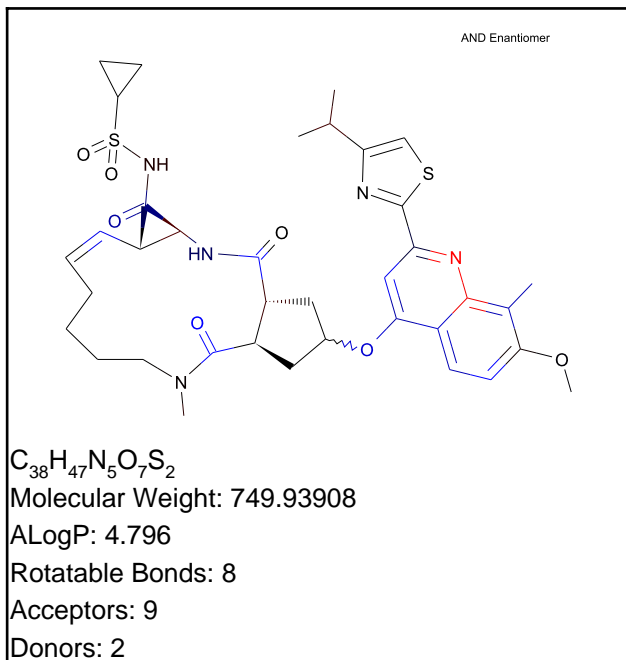

## Model Prediction

Prediction: 2.01

Unit: mg/kg\_body\_weight/day

Mahalanobis Distance: 16.8

Mahalanobis Distance p-value: 5.81e-019

Mahalanobis Distance: The Mahalanobis distance (MD) is a generalization of the Euclidean distance that accounts for correlations among the X properties. It is calculated as the distance to the center of the training data. The larger the MD, the less trustworthy the prediction.

Mahalanobis Distance p-value: The p-value gives the fraction of training data with an MD greater than or equal to the one for the given sample, assuming normally distributed data. The smaller the p-value, the less trustworthy the prediction. For highly non-normal X properties (e.g., fingerprints), the MD p-value is wildly inaccurate.

## Structural Similar Compounds

| Name                        | 223                                                                                 | D & C red no. 5                                                                     | Salicylazosulfapyridine                                                             |
|-----------------------------|-------------------------------------------------------------------------------------|-------------------------------------------------------------------------------------|-------------------------------------------------------------------------------------|
| Structure                   | 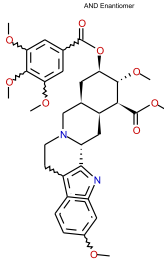 |  |  |
| Actual Endpoint (-log C)    | 5.08368                                                                             | 2.80732                                                                             | 2.5034                                                                              |
| Predicted Endpoint (-log C) | 5.08273                                                                             | 3.78615                                                                             | 3.54214                                                                             |
| Distance                    | 0.926                                                                               | 1.173                                                                               | 1.177                                                                               |
| Reference                   | CPDB                                                                                | CPDB                                                                                | CPDB                                                                                |

## Model Applicability

Unknown features are fingerprint features in the query molecule, but not found or appearing too infrequently in the training set.

- OPS PC14 out of range. Value: -4.1139. Training min, max, SD, explained variance: -3.6133, 3.7483, 1.312, 0.0215.
- OPS PC16 out of range. Value: 4.4468. Training min, max, SD, explained variance: -3.1026, 4.016, 1.245, 0.0193.
- Unknown ECFP\_2 feature: -309676563: [\*]N[C@]1(C[C@H]1[\*])C(=[\*])[\*]
- Unknown ECFP\_2 feature: -1049290660: [\*]C1([\*])C[C@H]1C=[\*]
- Unknown ECFP\_2 feature: -1818486371: [\*]NC(=O)C1([\*])[\*][\*]1
- Unknown ECFP\_2 feature: 946167604: [\*]C(=[\*])NS(=[\*])(=[\*])[\*]
- Unknown ECFP\_2 feature: 1310940530: [\*]C([\*])O[c](:[\*]):[\*]
- Unknown ECFP\_2 feature: 1411720546: [\*]C([\*])[c]1:[cH]:[\*]:[\*]:n:1
- Unknown ECFP\_2 feature: 733491677: [\*]:c](:[\*])C(C)C
- Unknown ECFP\_2 feature: 2121941848: [\*]NS(=O)(=O)C1[\*][\*]1
- Unknown ECFP\_2 feature: -622223421: [\*]S(=[\*])(=[\*])C1CC1

## Feature Contribution

### Top features for positive contribution

| Fingerprint | Bit/Smiles | Feature Structure | Score |
|-------------|------------|-------------------|-------|
|             |            |                   |       |



|                                        |            |                                                                                                                                               |        |
|----------------------------------------|------------|-----------------------------------------------------------------------------------------------------------------------------------------------|--------|
| ECFP_6                                 | 655739385  | <p>AND Enantiomer</p> 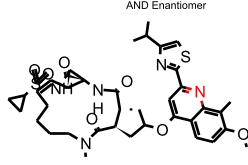 <p>[*]:n:[*]</p>                    | 0.229  |
| ECFP_6                                 | 834876373  | <p>AND Enantiomer</p>  <p>[*][c](:[*]):n:[c](:[*]):[*]</p> | 0.163  |
| ECFP_6                                 | 657586427  | <p>AND Enantiomer</p>  <p>[*]C([*])([*])[*]</p>            | 0.0789 |
| Top Features for negative contribution |            |                                                                                                                                               |        |
| Fingerprint                            | Bit/Smiles | Feature Structure                                                                                                                             | Score  |
| ECFP_6                                 | 2106656448 | <p>AND Enantiomer</p>  <p>[*]C(=O)[*]</p>                | -0.275 |
| ECFP_6                                 | 1996767644 | <p>AND Enantiomer</p>  <p>[*][c](:[*]):[cH]:[cH]:[*]</p> | -0.251 |

ECFP\_6

642810091

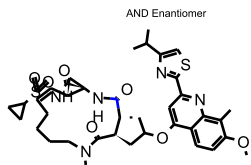

[\*][c](:[\*]):[\*]

-0.247

AND Enantiomer

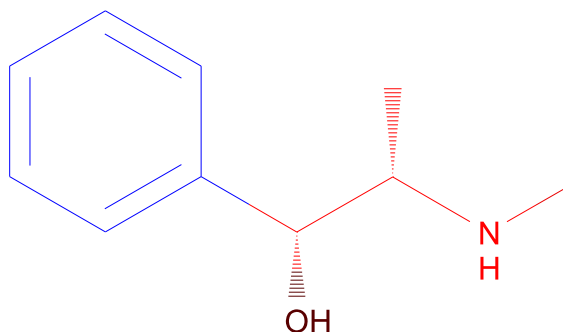C<sub>10</sub>H<sub>15</sub>NO

Molecular Weight: 165.232

ALogP: 1.234

Rotatable Bonds: 3

Acceptors: 2

Donors: 2

## Model Prediction

Prediction: 10.3

Unit: mg/kg\_body\_weight/day

Mahalanobis Distance: 9.3

Mahalanobis Distance p-value: 0.524

Mahalanobis Distance: The Mahalanobis distance (MD) is a generalization of the Euclidean distance that accounts for correlations among the X properties. It is calculated as the distance to the center of the training data. The larger the MD, the less trustworthy the prediction.

Mahalanobis Distance p-value: The p-value gives the fraction of training data with an MD greater than or equal to the one for the given sample, assuming normally distributed data. The smaller the p-value, the less trustworthy the prediction. For highly non-normal X properties (e.g., fingerprints), the MD p-value is wildly inaccurate.

## Structural Similar Compounds

| Name                        | a-Methylbenzyl alcohol | 665     | N-Nitrosoephedrine |
|-----------------------------|------------------------|---------|--------------------|
| Structure                   |                        |         |                    |
| Actual Endpoint (-log C)    | 2.42608                | 2.42608 | 3.30968            |
| Predicted Endpoint (-log C) | 2.72332                | 2.72332 | 4.9805             |
| Distance                    | 0.419                  | 0.419   | 0.490              |
| Reference                   | CPDB                   | CPDB    | CPDB               |

## Model Applicability

Unknown features are fingerprint features in the query molecule, but not found or appearing too infrequently in the training set.

1. All properties and OPS components are within expected ranges.

## Feature Contribution

### Top features for positive contribution

| Fingerprint | Bit/Smiles  | Feature Structure                                              | Score |
|-------------|-------------|----------------------------------------------------------------|-------|
| FCFP_6      | -1043250487 | <p>AND Enantiomer</p> <p><chem>[*]N[C@@H](C)C([*])O</chem></p> | 1.15  |

|                                        |                   |                                                                                                                                                            |              |
|----------------------------------------|-------------------|------------------------------------------------------------------------------------------------------------------------------------------------------------|--------------|
| FCFP_6                                 | -885550502        | <p>AND Enantiomer</p> 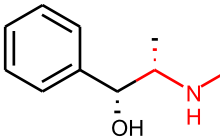 <p>[*]C([*])NC</p>                               | 0.229        |
| FCFP_6                                 | 203677720         | <p>AND Enantiomer</p>  <p>[*]C([*])[c](:[cH]:[*]<br/>):[cH]:[*]</p>     | 0.137        |
| Top Features for negative contribution |                   |                                                                                                                                                            |              |
| <b>Fingerprint</b>                     | <b>Bit/Smiles</b> | <b>Feature Structure</b>                                                                                                                                   | <b>Score</b> |
| FCFP_6                                 | 991735244         | <p>AND Enantiomer</p>  <p>[*][c]1:[*]:[cH]:[cH]<br/>:[cH]:[cH]:1</p>    | -0.422       |
| FCFP_6                                 | -2093839777       | <p>AND Enantiomer</p>  <p>[*][c]1:[cH]:[cH]:[cH]<br/>:[cH]:[cH]:1</p> | -0.378       |
| FCFP_6                                 | 16                | <p>AND Enantiomer</p>  <p>[*][c](:[*]):[*]</p>                        | -0.354       |



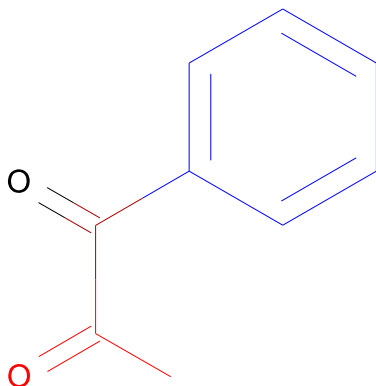C<sub>9</sub>H<sub>8</sub>O<sub>2</sub>

Molecular Weight: 148.159

ALogP: 1.446

Rotatable Bonds: 2

Acceptors: 2

Donors: 0

### Model Prediction

Prediction: 174

Unit: mg/kg\_body\_weight/day

Mahalanobis Distance: 7.84

Mahalanobis Distance p-value: 0.981

Mahalanobis Distance: The Mahalanobis distance (MD) is a generalization of the Euclidean distance that accounts for correlations among the X properties. It is calculated as the distance to the center of the training data. The larger the MD, the less trustworthy the prediction.

Mahalanobis Distance p-value: The p-value gives the fraction of training data with an MD greater than or equal to the one for the given sample, assuming normally distributed data. The smaller the p-value, the less trustworthy the prediction. For highly non-normal X properties (e.g., fingerprints), the MD p-value is wildly inaccurate.

### Structural Similar Compounds

| Name                        | N-Methyl-N-nitrosobenzamide | o-Nitrosotoluene | Nitrosomethylaniline |
|-----------------------------|-----------------------------|------------------|----------------------|
| Structure                   |                             |                  |                      |
| Actual Endpoint (-log C)    | 4.70607                     | 3.37827          | 5.98173              |
| Predicted Endpoint (-log C) | 4.64533                     | 3.14846          | 4.43574              |
| Distance                    | 0.457                       | 0.466            | 0.471                |
| Reference                   | CPDB                        | CPDB             | CPDB                 |

### Model Applicability

Unknown features are fingerprint features in the query molecule, but not found or appearing too infrequently in the training set.

1. All properties and OPS components are within expected ranges.

### Feature Contribution

#### Top features for positive contribution

| Fingerprint | Bit/Smiles | Feature Structure                 | Score |
|-------------|------------|-----------------------------------|-------|
| FCFP_6      | 565968762  | <br><chem>[*]C(=[*])C(=O)C</chem> | 0.266 |

|                                        |             |                                                                                                                                          |        |
|----------------------------------------|-------------|------------------------------------------------------------------------------------------------------------------------------------------|--------|
| FCFP_6                                 | 1           | 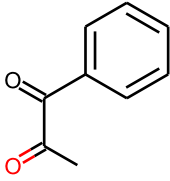<br><chem>[*]=O</chem>                                | 0.234  |
| FCFP_6                                 | 203677720   | <br><chem>[*]C([*])[c](:[cH]:[*])[cH]:[*]</chem>      | 0.137  |
| Top Features for negative contribution |             |                                                                                                                                          |        |
| Fingerprint                            | Bit/Smiles  | Feature Structure                                                                                                                        | Score  |
| FCFP_6                                 | 991735244   | <br><chem>[*][c]1:[*]:[cH]:[cH]:[cH]:[cH]:1</chem>    | -0.422 |
| FCFP_6                                 | -2093839777 | <br><chem>[*][c]1:[cH]:[cH]:[cH]:[cH]:[cH]:1</chem> | -0.378 |
| FCFP_6                                 | 16          | <br><chem>[*][c](:[*]):[*]</chem>                   | -0.354 |





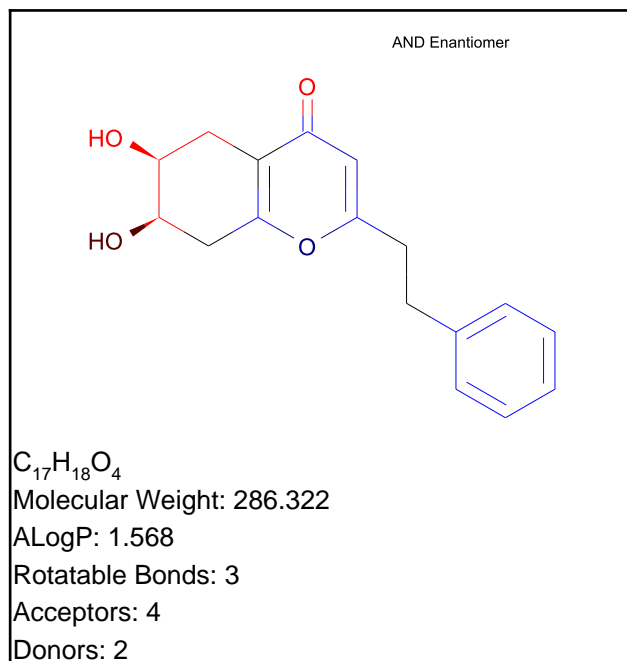

## Model Prediction

Prediction: 16

Unit: mg/kg\_body\_weight/day

Mahalanobis Distance: 11.2

Mahalanobis Distance p-value: 0.01

**Mahalanobis Distance:** The Mahalanobis distance (MD) is a generalization of the Euclidean distance that accounts for correlations among the X properties. It is calculated as the distance to the center of the training data. The larger the MD, the less trustworthy the prediction.

Mahalanobis Distance p-value: The p-value gives the fraction of training data with an MD greater than or equal to the one for the given sample, assuming normally distributed data. The smaller the p-value, the less trustworthy the prediction. For highly non-normal X properties (e.g., fingerprints), the MD p-value is wildly inaccurate.

## Structural Similar Compounds

| Name                        | C.I. disperse yellow 3                                                              | Indolidan                                                                           | 581                                                                                 |
|-----------------------------|-------------------------------------------------------------------------------------|-------------------------------------------------------------------------------------|-------------------------------------------------------------------------------------|
| Structure                   | 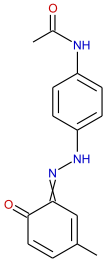 |  |  |
| Actual Endpoint (-log C)    | 2.85045                                                                             | 5.10722                                                                             | 3.42954                                                                             |
| Predicted Endpoint (-log C) | 3.2505                                                                              | 4.15845                                                                             | 3.78228                                                                             |
| Distance                    | 0.562                                                                               | 0.571                                                                               | 0.606                                                                               |
| Reference                   | CPDB                                                                                | CPDB                                                                                | CPDB                                                                                |

## Model Applicability

Unknown features are fingerprint features in the query molecule, but not found or appearing too infrequently in the training set.

1. All properties and OPS components are within expected ranges.

## Feature Contribution

### Top features for positive contribution

| Fingerprint | Bit/Smiles  | Feature Structure                                                                                                                                                    | Score |
|-------------|-------------|----------------------------------------------------------------------------------------------------------------------------------------------------------------------|-------|
| FCFP_6      | -1043250487 | <p>AND Enantiomer</p> 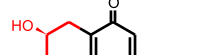 <p><chem>[*]N[C@@H](C(C(=O)O)C(=O)O)C(=O)O[*]</chem></p> | 1.15  |

|                                        |            |                                                                                                                                                      |        |
|----------------------------------------|------------|------------------------------------------------------------------------------------------------------------------------------------------------------|--------|
| FCFP_6                                 | 565968762  | <p>AND Enantiomer</p> 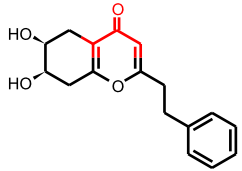 <p>[*]C(=[*])C(=O)C</p>                    | 0.266  |
| FCFP_6                                 | 1          | <p>AND Enantiomer</p>  <p>[*]=O</p>                               | 0.234  |
| Top Features for negative contribution |            |                                                                                                                                                      |        |
| Fingerprint                            | Bit/Smiles | Feature Structure                                                                                                                                    | Score  |
| FCFP_6                                 | 451847724  | <p>AND Enantiomer</p>  <p>[*]C(=CC(=[*]))[*]]</p>                 | -0.436 |
| FCFP_6                                 | 991735244  | <p>AND Enantiomer</p>  <p>[*][c]1:[*]:[cH]:[cH]:[cH]:[cH]:1</p> | -0.422 |
| FCFP_6                                 | 436886043  | <p>AND Enantiomer</p>  <p>[*]CC(=C([*]))C(=[*])</p>             | -0.383 |



AND Enantiomer

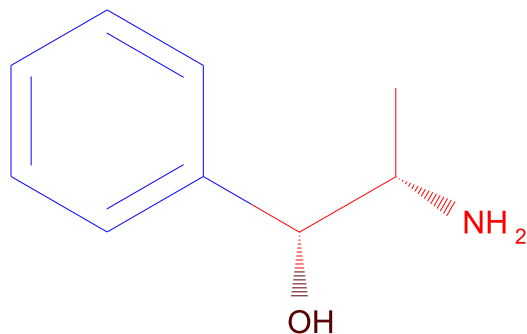 $C_9H_{13}NO$ 

Molecular Weight: 151.206

ALogP: 0.802

Rotatable Bonds: 2

Acceptors: 2

Donors: 2

## Model Prediction

Prediction: 23.9

Unit: mg/kg\_body\_weight/day

Mahalanobis Distance: 7.59

Mahalanobis Distance p-value: 0.993

Mahalanobis Distance: The Mahalanobis distance (MD) is a generalization of the Euclidean distance that accounts for correlations among the X properties. It is calculated as the distance to the center of the training data. The larger the MD, the less trustworthy the prediction.

Mahalanobis Distance p-value: The p-value gives the fraction of training data with an MD greater than or equal to the one for the given sample, assuming normally distributed data. The smaller the p-value, the less trustworthy the prediction. For highly non-normal X properties (e.g., fingerprints), the MD p-value is wildly inaccurate.

## Structural Similar Compounds

| Name                        | a-Methylbenzyl alcohol | 665     | N-Nitrosoephedrine |
|-----------------------------|------------------------|---------|--------------------|
| Structure                   |                        |         |                    |
| Actual Endpoint (-log C)    | 2.42608                | 2.42608 | 3.30968            |
| Predicted Endpoint (-log C) | 2.72332                | 2.72332 | 4.9805             |
| Distance                    | 0.384                  | 0.384   | 0.488              |
| Reference                   | CPDB                   | CPDB    | CPDB               |

## Model Applicability

Unknown features are fingerprint features in the query molecule, but not found or appearing too infrequently in the training set.

1. All properties and OPS components are within expected ranges.

## Feature Contribution

### Top features for positive contribution

| Fingerprint | Bit/Smiles  | Feature Structure                                                  | Score |
|-------------|-------------|--------------------------------------------------------------------|-------|
| FCFP_6      | -1043250487 | <p>AND Enantiomer</p> <p><chem>[*]N[C@@H](C)[C@H](O)[*]</chem></p> | 1.15  |

|                                        |                   |                                                                                                                                                            |              |
|----------------------------------------|-------------------|------------------------------------------------------------------------------------------------------------------------------------------------------------|--------------|
| FCFP_6                                 | 203677720         | <p>AND Enantiomer</p> 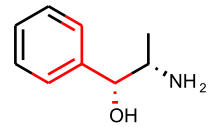 <p>[*]C([*])[c](:[cH]:[*]<br/>):[cH]:[*]</p>     | 0.137        |
| FCFP_6                                 | 136597326         | <p>AND Enantiomer</p>  <p>[*]C([*])C</p>                                | 0.0695       |
| Top Features for negative contribution |                   |                                                                                                                                                            |              |
| <b>Fingerprint</b>                     | <b>Bit/Smiles</b> | <b>Feature Structure</b>                                                                                                                                   | <b>Score</b> |
| FCFP_6                                 | 991735244         | <p>AND Enantiomer</p>  <p>[*][c]1:[*]:[cH]:[cH]<br/>:[cH]:[cH]:1</p>    | -0.422       |
| FCFP_6                                 | -2093839777       | <p>AND Enantiomer</p>  <p>[*][c]1:[cH]:[cH]:[cH]<br/>:[cH]:[cH]:1</p> | -0.378       |
| FCFP_6                                 | 16                | <p>AND Enantiomer</p>  <p>[*][c](:[*]):[*]</p>                        | -0.354       |



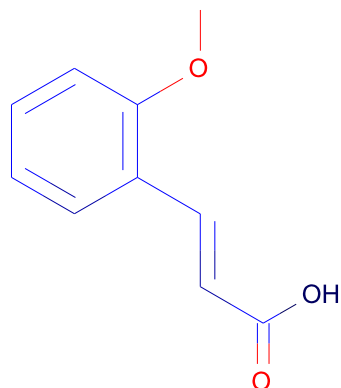C<sub>10</sub>H<sub>10</sub>O<sub>3</sub>

Molecular Weight: 178.185

ALogP: 1.911

Rotatable Bonds: 3

Acceptors: 3

Donors: 1

## Model Prediction

Prediction: 99.5

Unit: mg/kg\_body\_weight/day

Mahalanobis Distance: 10.8

Mahalanobis Distance p-value: 0.0352

Mahalanobis Distance: The Mahalanobis distance (MD) is a generalization of the Euclidean distance that accounts for correlations among the X properties. It is calculated as the distance to the center of the training data. The larger the MD, the less trustworthy the prediction.

Mahalanobis Distance p-value: The p-value gives the fraction of training data with an MD greater than or equal to the one for the given sample, assuming normally distributed data. The smaller the p-value, the less trustworthy the prediction. For highly non-normal X properties (e.g., fingerprints), the MD p-value is wildly inaccurate.

## Structural Similar Compounds

| Name                        | Coumarin s | N-Nitrosoephedrine | Phenacetin |
|-----------------------------|------------|--------------------|------------|
| Structure                   |            |                    |            |
| Actual Endpoint (-log C)    | 3.57149    | 3.30968            | 2.15647    |
| Predicted Endpoint (-log C) | 3.23061    | 4.9805             | 2.91803    |
| Distance                    | 0.468      | 0.482              | 0.497      |
| Reference                   | CPDB       | CPDB               | CPDB       |

## Model Applicability

Unknown features are fingerprint features in the query molecule, but not found or appearing too infrequently in the training set.

1. All properties and OPS components are within expected ranges.

## Feature Contribution

### Top features for positive contribution

| Fingerprint | Bit/Smiles | Feature Structure | Score |
|-------------|------------|-------------------|-------|
| FCFP_6      | 136627117  | <br>[*]OC         | 0.69  |

|                                        |             |                                                                                                                                                |        |
|----------------------------------------|-------------|------------------------------------------------------------------------------------------------------------------------------------------------|--------|
| FCFP_6                                 | -1176841573 | 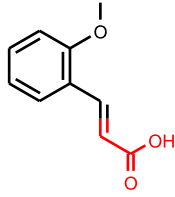<br><chem>[*]=CC(=O)O</chem>                                | 0.277  |
| FCFP_6                                 | -2090462286 | <br><chem>[*]O[c]1:[cH]:[cH]:[cH]:[cH]:[cH]:[c]:1[*]</chem> | 0.245  |
| Top Features for negative contribution |             |                                                                                                                                                |        |
| Fingerprint                            | Bit/Smiles  | Feature Structure                                                                                                                              | Score  |
| FCFP_6                                 | 451847724   | <br><chem>[*]C(=CC(=[*]))[*]</chem>                         | -0.436 |
| FCFP_6                                 | 991735244   | <br><chem>[*][c]1:[*]:[cH]:[cH]:[cH]:[cH]:[cH]:1</chem>   | -0.422 |
| FCFP_6                                 | 7           | <br><chem>[*]O</chem>                                     | -0.372 |





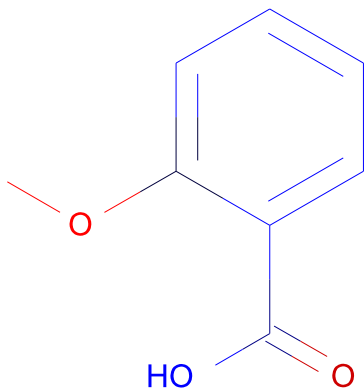
 $C_8H_8O_3$ 

Molecular Weight: 152.147

ALogP: 1.443

Rotatable Bonds: 2

Acceptors: 3

Donors: 1

## Model Prediction

Prediction: 61.8

Unit: mg/kg\_body\_weight/day

Mahalanobis Distance: 12

Mahalanobis Distance p-value: 0.000451

Mahalanobis Distance: The Mahalanobis distance (MD) is a generalization of the Euclidean distance that accounts for correlations among the X properties. It is calculated as the distance to the center of the training data. The larger the MD, the less trustworthy the prediction.

Mahalanobis Distance p-value: The p-value gives the fraction of training data with an MD greater than or equal to the one for the given sample, assuming normally distributed data. The smaller the p-value, the less trustworthy the prediction. For highly non-normal X properties (e.g., fingerprints), the MD p-value is wildly inaccurate.

## Structural Similar Compounds

| Name                        | 153     | p-Cresidine | m-Cresidine |
|-----------------------------|---------|-------------|-------------|
| Structure                   |         |             |             |
| Actual Endpoint (-log C)    | 3.61769 | 3.14606     | 2.46519     |
| Predicted Endpoint (-log C) | 3.58569 | 3.83612     | 3.87814     |
| Distance                    | 0.433   | 0.441       | 0.458       |
| Reference                   | CPDB    | CPDB        | CPDB        |

## Model Applicability

Unknown features are fingerprint features in the query molecule, but not found or appearing too infrequently in the training set.

1. All properties and OPS components are within expected ranges.

## Feature Contribution

### Top features for positive contribution

| Fingerprint | Bit/Smiles | Feature Structure | Score |
|-------------|------------|-------------------|-------|
| FCFP_6      | 136627117  | <br>[*]OC         | 0.69  |

|                                        |             |                                                                                                                                                |        |
|----------------------------------------|-------------|------------------------------------------------------------------------------------------------------------------------------------------------|--------|
| FCFP_6                                 | -2090462286 | 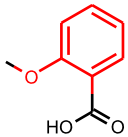<br><chem>[*]O[c]1:[cH]:[cH]:[cH]:[cH]:[cH]:[c]:1[*]</chem> | 0.245  |
| FCFP_6                                 | 1           | <br><chem>[*]=O</chem>                                      | 0.234  |
| Top Features for negative contribution |             |                                                                                                                                                |        |
| Fingerprint                            | Bit/Smiles  | Feature Structure                                                                                                                              | Score  |
| FCFP_6                                 | 991735244   | <br><chem>[*][c]1:[*]:[cH]:[cH]:[cH]:[cH]:1</chem>          | -0.422 |
| FCFP_6                                 | 7           | <br><chem>[*]O</chem>                                     | -0.372 |
| FCFP_6                                 | 16          | <br><chem>[*][c](:[*]):[*]</chem>                         | -0.354 |



AND Enantiomer

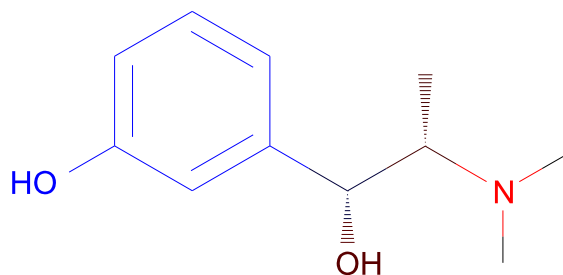C<sub>11</sub>H<sub>17</sub>NO<sub>2</sub>

Molecular Weight: 195.258

ALogP: 1.528

Rotatable Bonds: 3

Acceptors: 3

Donors: 2

## Model Prediction

Prediction: 254

Unit: mg/kg\_body\_weight/day

Mahalanobis Distance: 12.8

Mahalanobis Distance p-value: 1.19e-005

Mahalanobis Distance: The Mahalanobis distance (MD) is a generalization of the Euclidean distance that accounts for correlations among the X properties. It is calculated as the distance to the center of the training data. The larger the MD, the less trustworthy the prediction.

Mahalanobis Distance p-value: The p-value gives the fraction of training data with an MD greater than or equal to the one for the given sample, assuming normally distributed data. The smaller the p-value, the less trustworthy the prediction. For highly non-normal X properties (e.g., fingerprints), the MD p-value is wildly inaccurate.

## Structural Similar Compounds

| Name                        | N-Nitrosoephedrine | Acetaminophen | 3-Methoxycatechol |
|-----------------------------|--------------------|---------------|-------------------|
| Structure                   |                    |               |                   |
| Actual Endpoint (-log C)    | 3.30968            | 2.48484       | 3.45902           |
| Predicted Endpoint (-log C) | 4.9805             | 2.46116       | 2.88664           |
| Distance                    | 0.508              | 0.521         | 0.533             |
| Reference                   | CPDB               | CPDB          | CPDB              |

## Model Applicability

Unknown features are fingerprint features in the query molecule, but not found or appearing too infrequently in the training set.

1. All properties and OPS components are within expected ranges.

## Feature Contribution

### Top features for positive contribution

| Fingerprint | Bit/Smiles | Feature Structure             | Score |
|-------------|------------|-------------------------------|-------|
| FCFP_6      | 9          | <br><chem>[*]N([*])[*]</chem> | 0.385 |

|                                        |                   |                                                                                                                                                         |              |
|----------------------------------------|-------------------|---------------------------------------------------------------------------------------------------------------------------------------------------------|--------------|
| FCFP_6                                 | 203677720         | <p>AND Enantiomer</p> 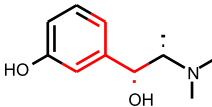 <p>[*]C([*])[c](:[cH]:[*]<br/>):[cH]:[*]</p>  | 0.137        |
| FCFP_6                                 | 136597326         | <p>AND Enantiomer</p>  <p>[*]C([*])C</p>                             | 0.0695       |
| Top Features for negative contribution |                   |                                                                                                                                                         |              |
| <b>Fingerprint</b>                     | <b>Bit/Smiles</b> | <b>Feature Structure</b>                                                                                                                                | <b>Score</b> |
| FCFP_6                                 | 991735244         | <p>AND Enantiomer</p>  <p>[*][c]1:[*]:[cH]:[cH]<br/>:[cH]:[cH]:1</p> | -0.422       |
| FCFP_6                                 | 7                 | <p>AND Enantiomer</p>  <p>[*]O</p>                                 | -0.372       |
| FCFP_6                                 | 16                | <p>AND Enantiomer</p>  <p>[*][c](:[*]):[*]</p>                     | -0.354       |



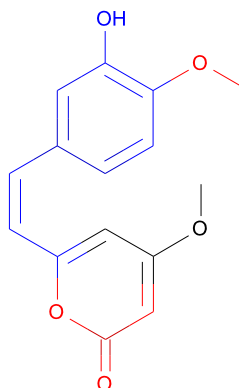C<sub>15</sub>H<sub>14</sub>O<sub>5</sub>

Molecular Weight: 274.269

ALogP: 1.969

Rotatable Bonds: 4

Acceptors: 5

Donors: 1

## Model Prediction

Prediction: 65.1

Unit: mg/kg\_body\_weight/day

Mahalanobis Distance: 12.7

Mahalanobis Distance p-value: 2.95e-005

Mahalanobis Distance: The Mahalanobis distance (MD) is a generalization of the Euclidean distance that accounts for correlations among the X properties. It is calculated as the distance to the center of the training data. The larger the MD, the less trustworthy the prediction.

Mahalanobis Distance p-value: The p-value gives the fraction of training data with an MD greater than or equal to the one for the given sample, assuming normally distributed data. The smaller the p-value, the less trustworthy the prediction. For highly non-normal X properties (e.g., fingerprints), the MD p-value is wildly inaccurate.

## Structural Similar Compounds

| Name                        | Nalidixic acid | Ciprofibrate | 1'-Acetoxysafrole |
|-----------------------------|----------------|--------------|-------------------|
| Structure                   |                |              |                   |
| Actual Endpoint (-log C)    | 3.06273        | 5.16666      | 3.94492           |
| Predicted Endpoint (-log C) | 3.02209        | 3.87886      | 3.37654           |
| Distance                    | 0.572          | 0.582        | 0.583             |
| Reference                   | CPDB           | CPDB         | CPDB              |

## Model Applicability

Unknown features are fingerprint features in the query molecule, but not found or appearing too infrequently in the training set.

1. All properties and OPS components are within expected ranges.

## Feature Contribution

### Top features for positive contribution

| Fingerprint | Bit/Smiles | Feature Structure | Score |
|-------------|------------|-------------------|-------|
| FCFP_6      | 136627117  | <br>[*]OC         | 0.69  |



|                                        |            |                                                                                                                        |        |
|----------------------------------------|------------|------------------------------------------------------------------------------------------------------------------------|--------|
| FCFP_6                                 | 565998553  | 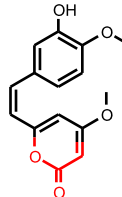<br><chem>[*]OC(=O)C=[*]</chem>     | 0.357  |
| FCFP_6                                 | 1          | <br><chem>[*]=O</chem>              | 0.234  |
| Top Features for negative contribution |            |                                                                                                                        |        |
| Fingerprint                            | Bit/Smiles | Feature Structure                                                                                                      | Score  |
| FCFP_6                                 | 451847724  | <br><chem>[*]C(=CC(=[*]))[*]</chem> | -0.436 |
| FCFP_6                                 | 7          | <br><chem>[*]O</chem>             | -0.372 |
| FCFP_6                                 | 16         | <br><chem>[*][c](:[*]):[*]</chem> | -0.354 |



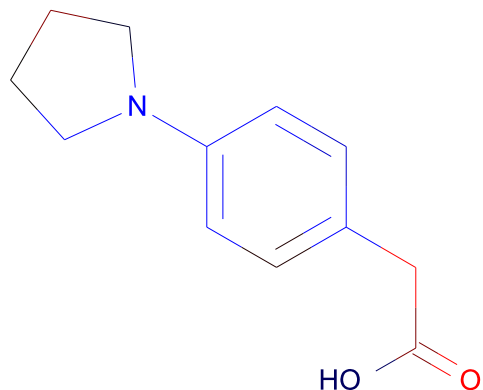

$C_{12}H_{15}NO_2$

Molecular Weight: 205.253

ALogP: 2.117

Rotatable Bonds: 3

Acceptors: 3

Donors: 1

## Model Prediction

Prediction: 54.6

Unit: mg/kg\_body\_weight/day

Mahalanobis Distance: 11.7

Mahalanobis Distance p-value: 0.00177

Mahalanobis Distance: The Mahalanobis distance (MD) is a generalization of the Euclidean distance that accounts for correlations among the X properties. It is calculated as the distance to the center of the training data. The larger the MD, the less trustworthy the prediction.

Mahalanobis Distance p-value: The p-value gives the fraction of training data with an MD greater than or equal to the one for the given sample, assuming normally distributed data. The smaller the p-value, the less trustworthy the prediction. For highly non-normal X properties (e.g., fingerprints), the MD p-value is wildly inaccurate.

## Structural Similar Compounds

| Name                        | 1'-Hydroxysafrole | Ciprofibrate | Phenacetin |
|-----------------------------|-------------------|--------------|------------|
| Structure                   |                   |              |            |
| Actual Endpoint (-log C)    | 3.98605           | 5.16666      | 2.15647    |
| Predicted Endpoint (-log C) | 3.25547           | 3.87886      | 2.91803    |
| Distance                    | 0.495             | 0.496        | 0.552      |
| Reference                   | CPDB              | CPDB         | CPDB       |

## Model Applicability

Unknown features are fingerprint features in the query molecule, but not found or appearing too infrequently in the training set.

1. All properties and OPS components are within expected ranges.

## Feature Contribution

### Top features for positive contribution

| Fingerprint | Bit/Smiles  | Feature Structure | Score |
|-------------|-------------|-------------------|-------|
| FCFP_6      | -1176841573 | <br>[*]=CC(=O)O   | 0.277 |

|                                        |            |                                                                                                                                   |        |
|----------------------------------------|------------|-----------------------------------------------------------------------------------------------------------------------------------|--------|
| FCFP_6                                 | 1          | 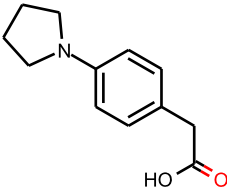<br>[*]=O                                      | 0.234  |
| FCFP_6                                 | 203677720  | <br>[*]C([*])[c](:[cH]:[*]<br>):[cH]:[*]       | 0.137  |
| Top Features for negative contribution |            |                                                                                                                                   |        |
| Fingerprint                            | Bit/Smiles | Feature Structure                                                                                                                 | Score  |
| FCFP_6                                 | 7          | <br>[*]O                                       | -0.372 |
| FCFP_6                                 | 16         | <br>[*][c](:[*]):[*]                         | -0.354 |
| FCFP_6                                 | 1674451008 | <br>[*]O[c]1:[cH]:[cH]:[c<br>H]:[*]:[c]:1[*] | -0.233 |



AND Enantiomer

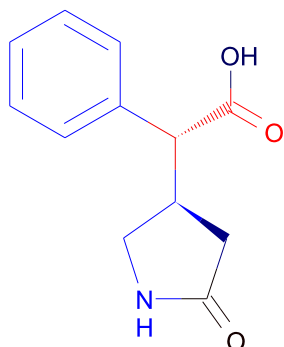C<sub>12</sub>H<sub>13</sub>NO<sub>3</sub>

Molecular Weight: 219.237

ALogP: 0.621

Rotatable Bonds: 3

Acceptors: 3

Donors: 2

## Model Prediction

Prediction: 570

Unit: mg/kg\_body\_weight/day

Mahalanobis Distance: 11.7

Mahalanobis Distance p-value: 0.00208

Mahalanobis Distance: The Mahalanobis distance (MD) is a generalization of the Euclidean distance that accounts for correlations among the X properties. It is calculated as the distance to the center of the training data. The larger the MD, the less trustworthy the prediction.

Mahalanobis Distance p-value: The p-value gives the fraction of training data with an MD greater than or equal to the one for the given sample, assuming normally distributed data. The smaller the p-value, the less trustworthy the prediction. For highly non-normal X properties (e.g., fingerprints), the MD p-value is wildly inaccurate.

## Structural Similar Compounds

| Name                        | 581     | 4-Ethoxy-phenylurea | Indolidan |
|-----------------------------|---------|---------------------|-----------|
| Structure                   |         |                     |           |
| Actual Endpoint (-log C)    | 3.42954 | 2.52579             | 5.10722   |
| Predicted Endpoint (-log C) | 3.78228 | 3.02654             | 4.15845   |
| Distance                    | 0.531   | 0.578               | 0.580     |
| Reference                   | CPDB    | CPDB                | CPDB      |

## Model Applicability

Unknown features are fingerprint features in the query molecule, but not found or appearing too infrequently in the training set.

- OPS PC27 out of range. Value: -2.9933. Training min, max, SD, explained variance: -2.8642, 4.2058, 1.002, 0.0096.

## Feature Contribution

### Top features for positive contribution

| Fingerprint | Bit/Smiles  | Feature Structure                        | Score |
|-------------|-------------|------------------------------------------|-------|
| FCFP_6      | -1176841573 | <p>AND Enantiomer</p> <p>[*]=CC(=O)O</p> | 0.277 |

|                                        |             |                                                                                                                                                            |        |
|----------------------------------------|-------------|------------------------------------------------------------------------------------------------------------------------------------------------------------|--------|
| FCFP_6                                 | 1           | <p>AND Enantiomer</p> 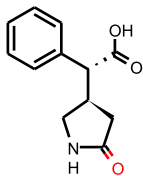 <p>[*]=O</p>                                     | 0.234  |
| FCFP_6                                 | -885550502  | <p>AND Enantiomer</p>  <p>[*]C([*])NC</p>                               | 0.229  |
| Top Features for negative contribution |             |                                                                                                                                                            |        |
| Fingerprint                            | Bit/Smiles  | Feature Structure                                                                                                                                          | Score  |
| FCFP_6                                 | -1272709286 | <p>AND Enantiomer</p>  <p>[*][C@H]1[*][*]NC1</p>                        | -0.526 |
| FCFP_6                                 | 991735244   | <p>AND Enantiomer</p>  <p>[*][c]1:[*]:[cH]:[cH]<br/>:[cH]:[cH]:1</p>  | -0.422 |
| FCFP_6                                 | -2093839777 | <p>AND Enantiomer</p>  <p>[*][c]1:[cH]:[cH]:[cH]<br/>:[cH]:[cH]:1</p> | -0.378 |





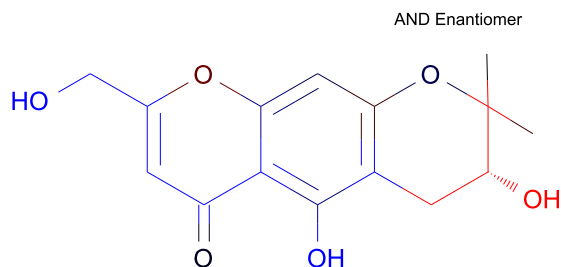

$C_{15}H_{16}O_6$

Molecular Weight: 292.284

ALogP: 0.901

Rotatable Bonds: 1

Acceptors: 6

Donors: 3

## Model Prediction

Prediction: 20.3

Unit: mg/kg\_body\_weight/day

Mahalanobis Distance: 15.2

Mahalanobis Distance p-value: 1.18e-011

Mahalanobis Distance: The Mahalanobis distance (MD) is a generalization of the Euclidean distance that accounts for correlations among the X properties. It is calculated as the distance to the center of the training data. The larger the MD, the less trustworthy the prediction.

Mahalanobis Distance p-value: The p-value gives the fraction of training data with an MD greater than or equal to the one for the given sample, assuming normally distributed data. The smaller the p-value, the less trustworthy the prediction. For highly non-normal X properties (e.g., fingerprints), the MD p-value is wildly inaccurate.

## Structural Similar Compounds

| Name                        | Purpurin | Prednisolone | 1085    |
|-----------------------------|----------|--------------|---------|
| Structure                   |          |              |         |
| Actual Endpoint (-log C)    | 2.57737  | 5.37215      | 5.37215 |
| Predicted Endpoint (-log C) | 3.49183  | 5.32932      | 5.32932 |
| Distance                    | 0.613    | 0.662        | 0.662   |
| Reference                   | CPDB     | CPDB         | CPDB    |

## Model Applicability

Unknown features are fingerprint features in the query molecule, but not found or appearing too infrequently in the training set.

1. All properties and OPS components are within expected ranges.

## Feature Contribution

### Top features for positive contribution

| Fingerprint | Bit/Smiles  | Feature Structure                       | Score |
|-------------|-------------|-----------------------------------------|-------|
| FCFP_6      | -1043250487 | <br><chem>[*]N[C@@H](C)C([*])[*]</chem> | 1.15  |

|                                        |             |                                                                                                                                      |        |
|----------------------------------------|-------------|--------------------------------------------------------------------------------------------------------------------------------------|--------|
| FCFP_6                                 | 1           | 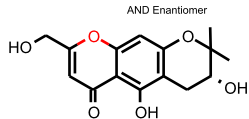<br><chem>[*]=O</chem>                            | 0.234  |
| FCFP_6                                 | 203677720   | <br><chem>[*]C([*])[c](:[cH]:[*]):[cH]:[*]</chem> | 0.137  |
| Top Features for negative contribution |             |                                                                                                                                      |        |
| Fingerprint                            | Bit/Smiles  | Feature Structure                                                                                                                    | Score  |
| FCFP_6                                 | -1272709286 | <br><chem>[*][C@H]1[*][*]NC1</chem>               | -0.526 |
| FCFP_6                                 | 451847724   | <br><chem>[*]C(=CC(=[*])[*])[*]</chem>          | -0.436 |
| FCFP_6                                 | 7           | <br><chem>[*]O</chem>                           | -0.372 |



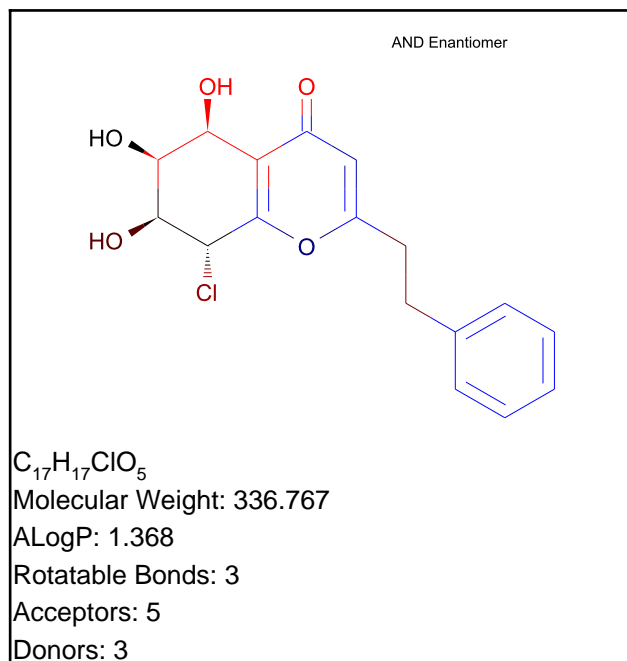

### Model Prediction

Prediction: 10.6

Unit: mg/kg\_body\_weight/day

Mahalanobis Distance: 12.8

Mahalanobis Distance p-value: 1.47e-005

Mahalanobis Distance: The Mahalanobis distance (MD) is a generalization of the Euclidean distance that accounts for correlations among the X properties. It is calculated as the distance to the center of the training data. The larger the MD, the less trustworthy the prediction.

Mahalanobis Distance p-value: The p-value gives the fraction of training data with an MD greater than or equal to the one for the given sample, assuming normally distributed data. The smaller the p-value, the less trustworthy the prediction. For highly non-normal X properties (e.g., fingerprints), the MD p-value is wildly inaccurate.

### Structural Similar Compounds

| Name                        | Prednisolone                                                                        | 1085                                                                                | Purpurin                                                                            |
|-----------------------------|-------------------------------------------------------------------------------------|-------------------------------------------------------------------------------------|-------------------------------------------------------------------------------------|
| Structure                   | 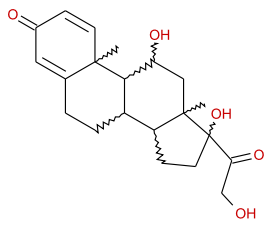 |  |  |
| Actual Endpoint (-log C)    | 5.37215                                                                             | 5.37215                                                                             | 2.57737                                                                             |
| Predicted Endpoint (-log C) | 5.32932                                                                             | 5.32932                                                                             | 3.49183                                                                             |
| Distance                    | 0.625                                                                               | 0.625                                                                               | 0.652                                                                               |
| Reference                   | CPDB                                                                                | CPDB                                                                                | CPDB                                                                                |

### Model Applicability

Unknown features are fingerprint features in the query molecule, but not found or appearing too infrequently in the training set.

1. All properties and OPS components are within expected ranges.

### Feature Contribution

#### Top features for positive contribution

| Fingerprint | Bit/Smiles  | Feature Structure                                                                                                                    | Score |
|-------------|-------------|--------------------------------------------------------------------------------------------------------------------------------------|-------|
| FCFP_6      | -1043250487 | 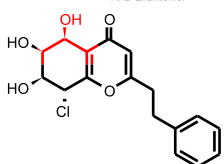<br><chem>[*]N[C@@H](C(C)[*])C1=CC=CC=C1</chem> | 1.15  |

|                                        |            |                                                                                                                                                           |        |
|----------------------------------------|------------|-----------------------------------------------------------------------------------------------------------------------------------------------------------|--------|
| FCFP_6                                 | 565968762  | <p>AND Enantiomer</p> 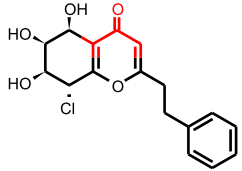 <p>[*]C(=[*])C(=O)C</p>                         | 0.266  |
| FCFP_6                                 | 1          | <p>AND Enantiomer</p>  <p>[*]=O</p>                                    | 0.234  |
| Top Features for negative contribution |            |                                                                                                                                                           |        |
| Fingerprint                            | Bit/Smiles | Feature Structure                                                                                                                                         | Score  |
| FCFP_6                                 | 451847724  | <p>AND Enantiomer</p>  <p>[*]C(=CC(=[*]))[*]]</p>                      | -0.436 |
| FCFP_6                                 | 991735244  | <p>AND Enantiomer</p>  <p>[*][c]1:[*]:[cH]:[cH]<br/>:[cH]:[cH]:1</p> | -0.422 |
| FCFP_6                                 | 436886043  | <p>AND Enantiomer</p>  <p>[*]CC(=C([*]))C(=[*])</p>                  | -0.383 |



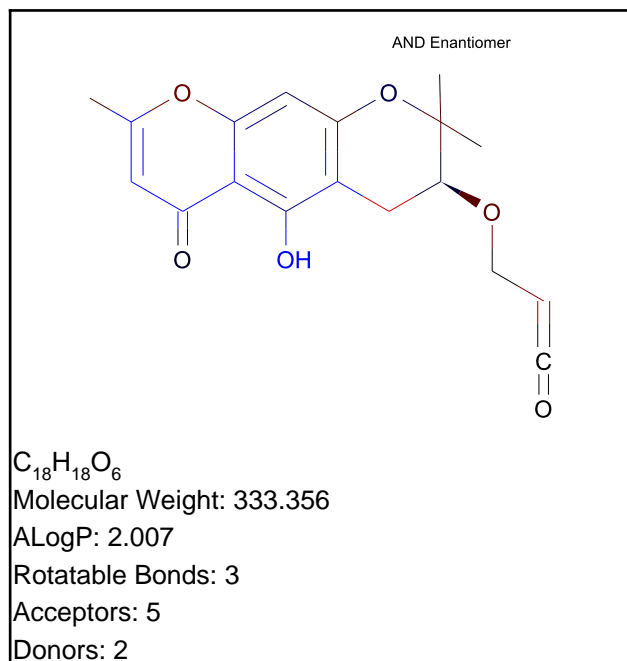

## Model Prediction

Prediction: 103

Unit: mg/kg\_body\_weight/day

Mahalanobis Distance: 14.5

Mahalanobis Distance p-value: 9.32e-010

Mahalanobis Distance: The Mahalanobis distance (MD) is a generalization of the Euclidean distance that accounts for correlations among the X properties. It is calculated as the distance to the center of the training data. The larger the MD, the less trustworthy the prediction.

Mahalanobis Distance p-value: The p-value gives the fraction of training data with an MD greater than or equal to the one for the given sample, assuming normally distributed data. The smaller the p-value, the less trustworthy the prediction. For highly non-normal X properties (e.g., fingerprints), the MD p-value is wildly inaccurate.

## Structural Similar Compounds

| Name                        | Oxolinic acid                                                                       | C.I. disperse yellow 3                                                              | 2-Chloro-5-(3,5-dimethylpiperi-di-nosulphonyl)benzoic acid                          |
|-----------------------------|-------------------------------------------------------------------------------------|-------------------------------------------------------------------------------------|-------------------------------------------------------------------------------------|
| Structure                   | 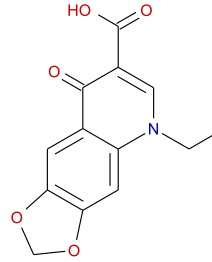 |  |  |
| Actual Endpoint (-log C)    | 3.19431                                                                             | 2.85045                                                                             | 4.83515                                                                             |
| Predicted Endpoint (-log C) | 3.75332                                                                             | 3.2505                                                                              | 4.5657                                                                              |
| Distance                    | 0.604                                                                               | 0.616                                                                               | 0.640                                                                               |
| Reference                   | CPDB                                                                                | CPDB                                                                                | CPDB                                                                                |

## Model Applicability

Unknown features are fingerprint features in the query molecule, but not found or appearing too infrequently in the training set.

1. All properties and OPS components are within expected ranges.
2. Unknown FCFP\_2 feature: 444624378: [\*]C=C=O

## Feature Contribution

| Top features for positive contribution |            |                                                                                                |       |
|----------------------------------------|------------|------------------------------------------------------------------------------------------------|-------|
| Fingerprint                            | Bit/Smiles | Feature Structure                                                                              | Score |
| FCFP_6                                 | 1          | 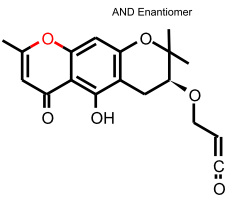<br>[*]=O | 0.234 |

|                                        |             |                                                                                                                                                        |        |
|----------------------------------------|-------------|--------------------------------------------------------------------------------------------------------------------------------------------------------|--------|
| FCFP_6                                 | 203677720   | <p>AND Enantiomer</p> 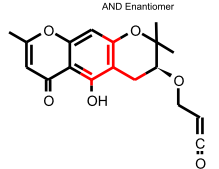 <p>[*]C([*])[c](:[cH]:[*]<br/>):[cH]:[*]</p> | 0.137  |
| FCFP_6                                 | -1272768868 | <p>AND Enantiomer</p>  <p>[*]N1[*][*]CC1</p>                        | 0.127  |
| Top Features for negative contribution |             |                                                                                                                                                        |        |
| Fingerprint                            | Bit/Smiles  | Feature Structure                                                                                                                                      | Score  |
| FCFP_6                                 | 451847724   | <p>AND Enantiomer</p>  <p>[*]C(=CC(=[*]))[*]</p>                    | -0.436 |
| FCFP_6                                 | 7           | <p>AND Enantiomer</p>  <p>[*]O</p>                                | -0.372 |
| FCFP_6                                 | 16          | <p>AND Enantiomer</p>  <p>[*][c](:[*]):[*]</p>                    | -0.354 |





AND Enantiomer

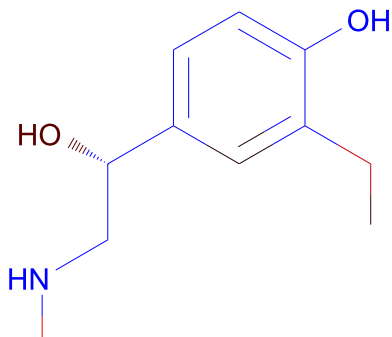C<sub>11</sub>H<sub>17</sub>NO<sub>2</sub>

Molecular Weight: 195.258

ALogP: 1.557

Rotatable Bonds: 4

Acceptors: 3

Donors: 3

## Model Prediction

Prediction: 436

Unit: mg/kg\_body\_weight/day

Mahalanobis Distance: 10.8

Mahalanobis Distance p-value: 0.031

Mahalanobis Distance: The Mahalanobis distance (MD) is a generalization of the Euclidean distance that accounts for correlations among the X properties. It is calculated as the distance to the center of the training data. The larger the MD, the less trustworthy the prediction.

Mahalanobis Distance p-value: The p-value gives the fraction of training data with an MD greater than or equal to the one for the given sample, assuming normally distributed data. The smaller the p-value, the less trustworthy the prediction. For highly non-normal X properties (e.g., fingerprints), the MD p-value is wildly inaccurate.

## Structural Similar Compounds

| Name                        | Salbutamol | Terbutaline | Procabazine |
|-----------------------------|------------|-------------|-------------|
| Structure                   |            |             |             |
| Actual Endpoint (-log C)    | 3.7769     | 2.73995     | 4.74183     |
| Predicted Endpoint (-log C) | 2.66345    | 2.96169     | 5.26514     |
| Distance                    | 0.408      | 0.476       | 0.513       |
| Reference                   | CPDB       | CPDB        | CPDB        |

## Model Applicability

Unknown features are fingerprint features in the query molecule, but not found or appearing too infrequently in the training set.

1. All properties and OPS components are within expected ranges.

## Feature Contribution

### Top features for positive contribution

| Fingerprint | Bit/Smiles | Feature Structure                        | Score |
|-------------|------------|------------------------------------------|-------|
| FCFP_6      | -885550502 | <p>AND Enantiomer</p> <p>[*]C([*])NC</p> | 0.229 |

|                                        |             |                                                                                                                                                        |        |
|----------------------------------------|-------------|--------------------------------------------------------------------------------------------------------------------------------------------------------|--------|
| FCFP_6                                 | 203677720   | <p>AND Enantiomer</p> 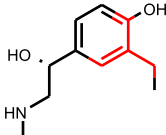 <p>[*]C([*])[c](:[cH]:[*]<br/>):[cH]:[*]</p> | 0.137  |
| FCFP_6                                 | 136597326   | <p>AND Enantiomer</p>  <p>[*]C([*])C</p>                            | 0.0695 |
| Top Features for negative contribution |             |                                                                                                                                                        |        |
| Fingerprint                            | Bit/Smiles  | Feature Structure                                                                                                                                      | Score  |
| FCFP_6                                 | -1272709286 | <p>AND Enantiomer</p>  <p>[*][C@H]1[*][*]NC1</p>                    | -0.526 |
| FCFP_6                                 | 7           | <p>AND Enantiomer</p>  <p>[*]O</p>                                | -0.372 |
| FCFP_6                                 | 16          | <p>AND Enantiomer</p>  <p>[*][c](:[*]):[*]</p>                    | -0.354 |



AND Enantiomer

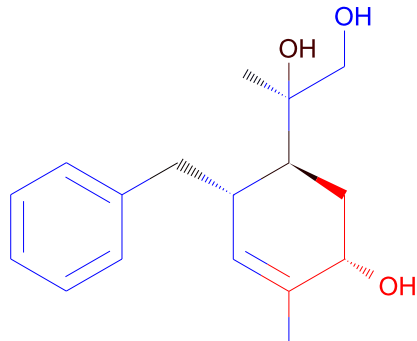C<sub>17</sub>H<sub>24</sub>O<sub>3</sub>

Molecular Weight: 276.371

ALogP: 2.165

Rotatable Bonds: 4

Acceptors: 3

Donors: 3

## Model Prediction

Prediction: 220

Unit: mg/kg\_body\_weight/day

Mahalanobis Distance: 12.8

Mahalanobis Distance p-value: 1.69e-005

Mahalanobis Distance: The Mahalanobis distance (MD) is a generalization of the Euclidean distance that accounts for correlations among the X properties. It is calculated as the distance to the center of the training data. The larger the MD, the less trustworthy the prediction.

Mahalanobis Distance p-value: The p-value gives the fraction of training data with an MD greater than or equal to the one for the given sample, assuming normally distributed data. The smaller the p-value, the less trustworthy the prediction. For highly non-normal X properties (e.g., fingerprints), the MD p-value is wildly inaccurate.

## Structural Similar Compounds

| Name                        | Procarbazine | C.I. disperse yellow 3 | Terbutaline |
|-----------------------------|--------------|------------------------|-------------|
| Structure                   |              |                        |             |
| Actual Endpoint (-log C)    | 4.74183      | 2.85045                | 2.73995     |
| Predicted Endpoint (-log C) | 5.26514      | 3.2505                 | 2.96169     |
| Distance                    | 0.618        | 0.619                  | 0.623       |
| Reference                   | CPDB         | CPDB                   | CPDB        |

## Model Applicability

Unknown features are fingerprint features in the query molecule, but not found or appearing too infrequently in the training set.

1. All properties and OPS components are within expected ranges.

## Feature Contribution

### Top features for positive contribution

| Fingerprint | Bit/Smiles  | Feature Structure                                           | Score |
|-------------|-------------|-------------------------------------------------------------|-------|
| FCFP_6      | -1043250487 | <p>AND Enantiomer</p> <p>[*]N[C@@H](C)[C]([*])[*]<br/>1</p> | 1.15  |

|                                        |             |                                                                                                                                                                   |        |
|----------------------------------------|-------------|-------------------------------------------------------------------------------------------------------------------------------------------------------------------|--------|
| FCFP_6                                 | 203677720   | <p>AND Enantiomer</p> 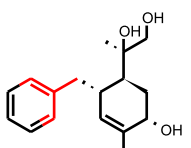 <p><chem>[*]C([*])[c](:[cH]:[*]):[cH]:[*]</chem></p>    | 0.137  |
| FCFP_6                                 | -1272798659 | <p>AND Enantiomer</p>  <p><chem>[*]C([*])CC(=[*])[*]</chem></p>                | 0.11   |
| Top Features for negative contribution |             |                                                                                                                                                                   |        |
| Fingerprint                            | Bit/Smiles  | Feature Structure                                                                                                                                                 | Score  |
| FCFP_6                                 | -1272709286 | <p>AND Enantiomer</p>  <p><chem>[*][C@H]1[*][*]NC1</chem></p>                  | -0.526 |
| FCFP_6                                 | 451847724   | <p>AND Enantiomer</p>  <p><chem>[*]C(=CC(=[*]))[*]</chem></p>                | -0.436 |
| FCFP_6                                 | 991735244   | <p>AND Enantiomer</p>  <p><chem>[*][c]1:[*]:[cH]:[cH]:[cH]:[cH]:1</chem></p> | -0.422 |



# Simeprevir

# TOPKAT\_Carcinogenic\_Potency\_TD50\_Rat

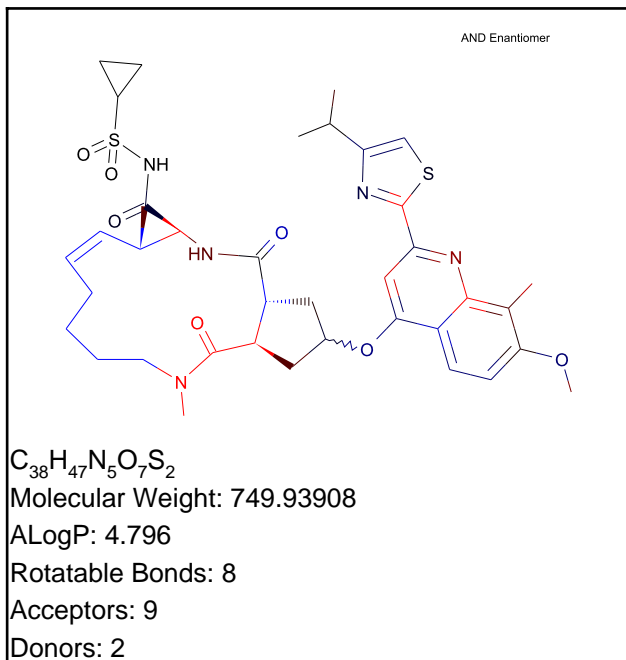

## Model Prediction

Prediction: 0.28

Unit: mg/kg\_body\_weight/day

Mahalanobis Distance: 24.1

Mahalanobis Distance p-value: 1.44e-046

Mahalanobis Distance: The Mahalanobis distance (MD) is a generalization of the Euclidean distance that accounts for correlations among the X properties. It is calculated as the distance to the center of the training data. The larger the MD, the less trustworthy the prediction.

Mahalanobis Distance p-value: The p-value gives the fraction of training data with an MD greater than or equal to the one for the given sample, assuming normally distributed data. The smaller the p-value, the less trustworthy the prediction. For highly non-normal X properties (e.g., fingerprints), the MD p-value is wildly inaccurate.

## Structural Similar Compounds

| Name                        | 411                                                                                 | 223                                                                                 | 188                                                                                 |
|-----------------------------|-------------------------------------------------------------------------------------|-------------------------------------------------------------------------------------|-------------------------------------------------------------------------------------|
| Structure                   | 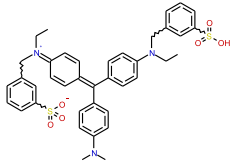 |  |  |
| Actual Endpoint (-log C)    | 3.06566                                                                             | 6.29867                                                                             | 5.5378                                                                              |
| Predicted Endpoint (-log C) | 4.8672                                                                              | 7.5657                                                                              | 5.71925                                                                             |
| Distance                    | 0.846                                                                               | 0.861                                                                               | 0.891                                                                               |
| Reference                   | CPDB                                                                                | CPDB                                                                                | CPDB                                                                                |

## Model Applicability

Unknown features are fingerprint features in the query molecule, but not found or appearing too infrequently in the training set.

- OPS PC27 out of range. Value: -3.3094. Training min, max, SD, explained variance: -2.8642, 4.2058, 1.002, 0.0096.

## Feature Contribution

### Top features for positive contribution

| Fingerprint | Bit/Smiles | Feature Structure                                                                              | Score |
|-------------|------------|------------------------------------------------------------------------------------------------|-------|
| FCFP_6      | 136627117  | 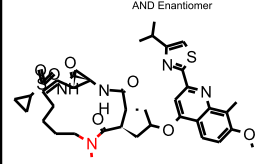<br>[*]OC | 0.69  |



|                                        |            |                                                                                                                                                       |        |
|----------------------------------------|------------|-------------------------------------------------------------------------------------------------------------------------------------------------------|--------|
| FCFP_6                                 | 565998553  | <p>AND Enantiomer</p> 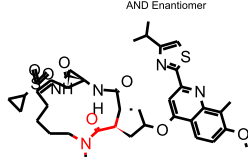 <p>[*]OC(=O)C=[*]</p>                       | 0.357  |
| FCFP_6                                 | 690511177  | <p>AND Enantiomer</p>  <p>[*]:[cH]:[c](n:[*])[<br/>c]([*]):[*]</p> | 0.293  |
| Top Features for negative contribution |            |                                                                                                                                                       |        |
| Fingerprint                            | Bit/Smiles | Feature Structure                                                                                                                                     | Score  |
| FCFP_6                                 | 1175638033 | <p>AND Enantiomer</p>  <p>[*]CCCCC=[*]</p>                         | -0.512 |
| FCFP_6                                 | 451847724  | <p>AND Enantiomer</p>  <p>[*]C(=CC(=[*]))[*])[*]</p>             | -0.436 |
| FCFP_6                                 | 16         | <p>AND Enantiomer</p>  <p>[*][c]([*]):[*]</p>                    | -0.354 |



AND Enantiomer

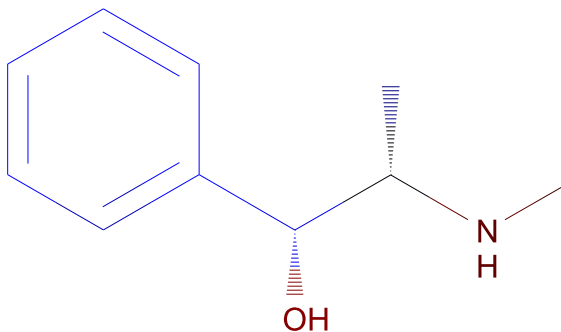 $C_{10}H_{15}NO$ 

Molecular Weight: 165.232

ALogP: 1.234

Rotatable Bonds: 3

Acceptors: 2

Donors: 2

## Model Prediction

Prediction: 0.109

Unit: g/kg\_body\_weight

Mahalanobis Distance: 15

Mahalanobis Distance p-value: 0.161

Mahalanobis Distance: The Mahalanobis distance (MD) is a generalization of the Euclidean distance that accounts for correlations among the X properties. It is calculated as the distance to the center of the training data. The larger the MD, the less trustworthy the prediction.

Mahalanobis Distance p-value: The p-value gives the fraction of training data with an MD greater than or equal to the one for the given sample, assuming normally distributed data. The smaller the p-value, the less trustworthy the prediction. For highly non-normal X properties (e.g., fingerprints), the MD p-value is wildly inaccurate.

## Structural Similar Compounds

| Name                        | EPHEDRINE SULPHATE | ALPHA-METHYLBENZYL ALCOHOL | DL-AMPHETAMINE SULFATE |
|-----------------------------|--------------------|----------------------------|------------------------|
| Structure                   |                    |                            |                        |
| Actual Endpoint (-log C)    | 4.42222            | 2.65882                    | 4.43204                |
| Predicted Endpoint (-log C) | 3.18027            | 2.85                       | 3.16317                |
| Distance                    | 0.000              | 0.456                      | 0.496                  |
| Reference                   | NTP 307 41         | NTP REPORT # 369           | NTP 387 58             |

## Model Applicability

Unknown features are fingerprint features in the query molecule, but not found or appearing too infrequently in the training set.

1. All properties and OPS components are within expected ranges.
2. Unknown ECFP\_6 feature: 2023785560: [\*]C([\*])O
3. Unknown ECFP\_6 feature: -222940837: [\*]C([\*])[C@H](O)[c](:[\*]):[\*]
4. Unknown ECFP\_6 feature: -871548073: [\*]N[C@@H](C)C([\*])[\*]
5. Unknown ECFP\_6 feature: 1336634178: [\*]C([\*])NC
6. Unknown ECFP\_6 feature: -176846085: [\*]C([\*])[c](:[cH]:[\*]):[cH]:[\*]
7. Unknown ECFP\_6 feature: 1997021792: [\*]:[cH]:[cH]:[cH]:[\*]
8. Unknown ECFP\_6 feature: 864287155: [\*]NC

## Feature Contribution

### Top features for positive contribution

| Fingerprint | Bit/Smiles | Feature Structure | Score |
|-------------|------------|-------------------|-------|
|             |            |                   |       |

|                                        |                   |                                                                                                                                                           |              |
|----------------------------------------|-------------------|-----------------------------------------------------------------------------------------------------------------------------------------------------------|--------------|
| FCFP_6                                 | 3                 | AND Enantiomer<br>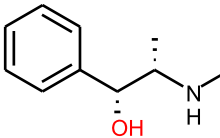<br><chem>[*]O</chem>                                | 0.0924       |
| FCFP_6                                 | -2093839777       | AND Enantiomer<br><br><chem>[*][c]1:[cH]:[cH]:[cH]:[cH]:[cH]:1</chem>  | 0.078        |
| FCFP_6                                 | -885550502        | AND Enantiomer<br><br><chem>[*]C([*])NC</chem>                         | 0.0684       |
| Top Features for negative contribution |                   |                                                                                                                                                           |              |
| <b>Fingerprint</b>                     | <b>Bit/Smiles</b> | <b>Feature Structure</b>                                                                                                                                  | <b>Score</b> |
| FCFP_6                                 | 991735244         | AND Enantiomer<br><br><chem>[*][c]1:[*]:[cH]:[cH]:[cH]:[cH]:1</chem> | -0.134       |
| ECFP_6                                 | 1564392544        | AND Enantiomer<br><br><chem>[*][c]1:[*]:[cH]:[cH]:[cH]:[cH]:1</chem> | -0.133       |

|        |             |                                                                                                                                                                                                                  |         |
|--------|-------------|------------------------------------------------------------------------------------------------------------------------------------------------------------------------------------------------------------------|---------|
| FCFP_6 | -1698724694 | <p data-bbox="1486 103 1581 120">AND Enantiomer</p> 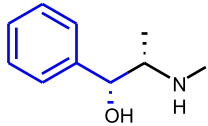 <p data-bbox="1388 302 1560 354">[*]C([*])[c]1:[cH]:[cH]:[cH]:[cH]:1</p> | -0.0944 |
|--------|-------------|------------------------------------------------------------------------------------------------------------------------------------------------------------------------------------------------------------------|---------|

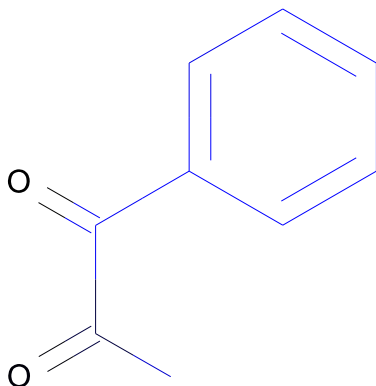C<sub>9</sub>H<sub>8</sub>O<sub>2</sub>

Molecular Weight: 148.159

ALogP: 1.446

Rotatable Bonds: 2

Acceptors: 2

Donors: 0

### Model Prediction

Prediction: 0.587

Unit: g/kg\_body\_weight

Mahalanobis Distance: 14.6

Mahalanobis Distance p-value: 0.257

Mahalanobis Distance: The Mahalanobis distance (MD) is a generalization of the Euclidean distance that accounts for correlations among the X properties. It is calculated as the distance to the center of the training data. The larger the MD, the less trustworthy the prediction.

Mahalanobis Distance p-value: The p-value gives the fraction of training data with an MD greater than or equal to the one for the given sample, assuming normally distributed data. The smaller the p-value, the less trustworthy the prediction. For highly non-normal X properties (e.g., fingerprints), the MD p-value is wildly inaccurate.

### Structural Similar Compounds

| Name                        | BENZYL ACETATE   | BENZALDEHYDE     | ALPHA-METHYLBENZYL ALCOHOL |
|-----------------------------|------------------|------------------|----------------------------|
| Structure                   |                  |                  |                            |
| Actual Endpoint (-log C)    | 2.62394          | 2.87048          | 2.65882                    |
| Predicted Endpoint (-log C) | 2.60518          | 2.6326           | 2.85                       |
| Distance                    | 0.397            | 0.441            | 0.485                      |
| Reference                   | NTP REPORT # 250 | NTP REPORT # 378 | NTP REPORT # 369           |

### Model Applicability

Unknown features are fingerprint features in the query molecule, but not found or appearing too infrequently in the training set.

1. All properties and OPS components are within expected ranges.
2. Unknown ECFP\_6 feature: 1997021792: [\*]:[cH]:[cH]:[\*]
3. Unknown ECFP\_6 feature: -175146122: [\*]C(=[\*])[c](:[cH]:[\*]):[cH]:[\*]
4. Unknown ECFP\_6 feature: 1432101658: [\*]C(=[\*])C(=O)[c](:[\*]):[\*]
5. Unknown ECFP\_6 feature: -472613004: [\*]C(=[\*])C(=O)C

### Feature Contribution

#### Top features for positive contribution

| Fingerprint | Bit/Smiles  | Feature Structure                           | Score |
|-------------|-------------|---------------------------------------------|-------|
| FCFP_6      | -2093839777 | <br>[*][c]1:[cH]:[cH]:[cH]:[cH]:[cH]:[cH]:1 | 0.078 |

|        |            |                                                                                                                      |        |
|--------|------------|----------------------------------------------------------------------------------------------------------------------|--------|
| ECFP_6 | 2099970318 | 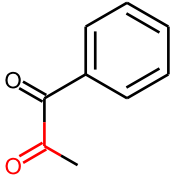<br><chem>[*]C(=O)[*]</chem>      | 0.0766 |
| ECFP_6 | 642810091  | <br><chem>[*][c](:[*]):[*]</chem> | 0.0424 |

### Top Features for negative contribution

| Fingerprint | Bit/Smiles | Feature Structure                                                                                                                       | Score  |
|-------------|------------|-----------------------------------------------------------------------------------------------------------------------------------------|--------|
| FCFP_6      | 991735244  | 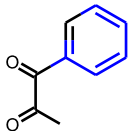<br><chem>[*][c]1:[*]:[cH]:[cH]:[cH]:[cH]:1</chem>   | -0.134 |
| ECFP_6      | 1564392544 | <br><chem>[*][c]1:[*]:[cH]:[cH]:[cH]:[cH]:1</chem> | -0.133 |
| FCFP_6      | 1          | <br><chem>[*]=O</chem>                             | -0.102 |





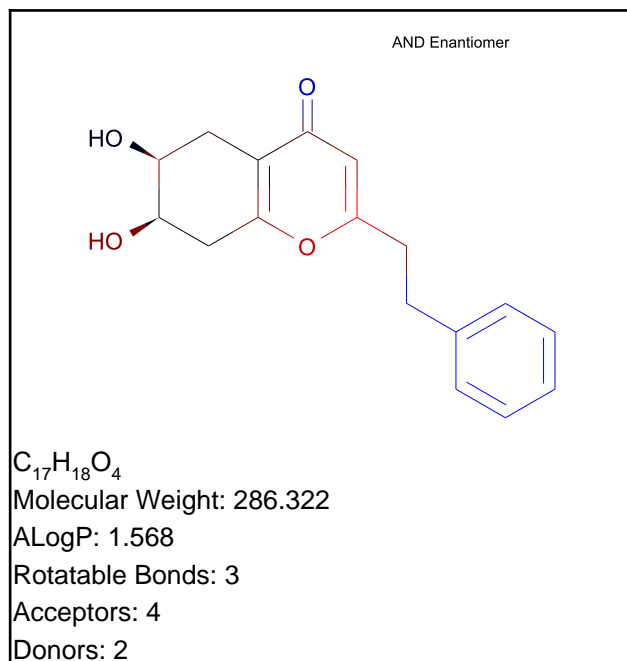

### Model Prediction

Prediction: 0.0229

Unit: g/kg\_body\_weight

Mahalanobis Distance: 25.8

Mahalanobis Distance p-value: 6.13e-017

Mahalanobis Distance: The Mahalanobis distance (MD) is a generalization of the Euclidean distance that accounts for correlations among the X properties. It is calculated as the distance to the center of the training data. The larger the MD, the less trustworthy the prediction.

Mahalanobis Distance p-value: The p-value gives the fraction of training data with an MD greater than or equal to the one for the given sample, assuming normally distributed data. The smaller the p-value, the less trustworthy the prediction. For highly non-normal X properties (e.g., fingerprints), the MD p-value is wildly inaccurate.

### Structural Similar Compounds

| Name                        | NALTREXONE.HCL                                                                      | NALIDIXIC ACID                                                                      | CARBOXIN                                                                            |
|-----------------------------|-------------------------------------------------------------------------------------|-------------------------------------------------------------------------------------|-------------------------------------------------------------------------------------|
| Structure                   | 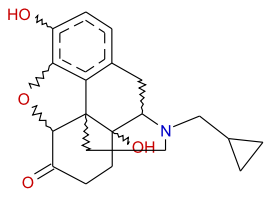 |  |  |
| Actual Endpoint (-log C)    | 4.05615                                                                             | 3.36594                                                                             | 3.8945                                                                              |
| Predicted Endpoint (-log C) | 4.77886                                                                             | 4.24773                                                                             | 3.7395                                                                              |
| Distance                    | 0.524                                                                               | 0.595                                                                               | 0.602                                                                               |
| Reference                   | NDA-18932                                                                           | NTP REPORT # 368                                                                    | EPA COVER SHEET 0022;890701;(1)                                                     |

### Model Applicability

Unknown features are fingerprint features in the query molecule, but not found or appearing too infrequently in the training set.

1. All properties and OPS components are within expected ranges.
2. Unknown ECFP\_6 feature: 1875238785: [\*]C\C(=C[\*])\O[\*]
3. Unknown ECFP\_6 feature: 464808839: [\*]C(=CC(=[\*])[\*])[\*]
4. Unknown ECFP\_6 feature: 1299558496: [\*]C(=[\*])C(=O)C=[\*]
5. Unknown ECFP\_6 feature: 1794461805: [\*]CC(=C([\*])[\*])C(=[\*])[\*]
6. Unknown ECFP\_6 feature: 53207596: [\*]C([\*])CC(=[\*])[\*]
7. Unknown ECFP\_6 feature: -329826665: [\*]C[C@H](O)C([\*])[\*]
8. Unknown ECFP\_6 feature: 1650944136: [\*]CC(=C([\*])[\*])O[\*]
9. Unknown ECFP\_6 feature: -560785749: [\*]C(=[\*])OC(=[\*])[\*]
10. Unknown ECFP\_6 feature: -1795525632: [\*]CCC(=[\*])[\*]
11. Unknown ECFP\_6 feature: 1997021792: [\*]:[cH]:[cH]:[cH]:[\*]
12. Unknown ECFP\_6 feature: 2024749573: [\*]C([\*])O

### Feature Contribution

#### Top features for positive contribution

| Fingerprint | Bit/Smiles | Feature Structure | Score |
|-------------|------------|-------------------|-------|
|             |            |                   |       |

| FCFP_6                                 | 451847724   | <p>AND Enantiomer</p> 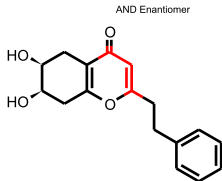 <p>[*]C(=CC(=[*]))[*]</p>                       | 0.16   |
|----------------------------------------|-------------|-----------------------------------------------------------------------------------------------------------------------------------------------------------|--------|
| ECFP_6                                 | -167460056  | <p>AND Enantiomer</p>  <p>[*]C([*])[*]</p>                             | 0.136  |
| FCFP_6                                 | -1143715940 | <p>AND Enantiomer</p>  <p>[*]C(=[*])OC(=[*])[*]</p>                    | 0.13   |
| Top Features for negative contribution |             |                                                                                                                                                           |        |
| Fingerprint                            | Bit/Smiles  | Feature Structure                                                                                                                                         | Score  |
| FCFP_6                                 | 991735244   | <p>AND Enantiomer</p>  <p>[*][c]1:[*]:[cH]:[cH]<br/>:[cH]:[cH]:1</p> | -0.134 |
| ECFP_6                                 | 1564392544  | <p>AND Enantiomer</p>  <p>[*][c]1:[*]:[cH]:[cH]<br/>:[cH]:[cH]:1</p> | -0.133 |

|        |            |                                                                                                                                                                                                                                                                                                                                                                                                                                                            |       |
|--------|------------|------------------------------------------------------------------------------------------------------------------------------------------------------------------------------------------------------------------------------------------------------------------------------------------------------------------------------------------------------------------------------------------------------------------------------------------------------------|-------|
| ECFP_6 | 2106656448 | <p>AND Enantiomer</p> 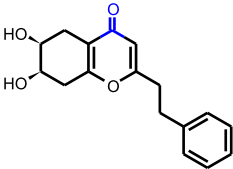 <p>The chemical structure shows a bicyclic system consisting of a cyclohexane ring fused to a five-membered ring containing an oxygen atom and a ketone group. The cyclohexane ring has two hydroxyl groups. A benzyl group is attached to the five-membered ring. The ketone oxygen is highlighted in blue.</p> <p><chem>[*]C(=O)[*]</chem></p> | -0.11 |
|--------|------------|------------------------------------------------------------------------------------------------------------------------------------------------------------------------------------------------------------------------------------------------------------------------------------------------------------------------------------------------------------------------------------------------------------------------------------------------------------|-------|

AND Enantiomer

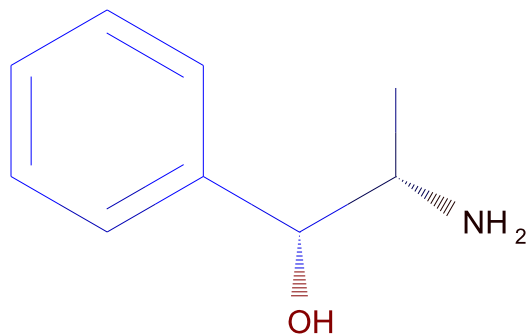 $C_9H_{13}NO$ 

Molecular Weight: 151.206

ALogP: 0.802

Rotatable Bonds: 2

Acceptors: 2

Donors: 2

## Model Prediction

Prediction: 0.153

Unit: g/kg\_body\_weight

Mahalanobis Distance: 17.5

Mahalanobis Distance p-value: 0.000811

Mahalanobis Distance: The Mahalanobis distance (MD) is a generalization of the Euclidean distance that accounts for correlations among the X properties. It is calculated as the distance to the center of the training data. The larger the MD, the less trustworthy the prediction.

Mahalanobis Distance p-value: The p-value gives the fraction of training data with an MD greater than or equal to the one for the given sample, assuming normally distributed data. The smaller the p-value, the less trustworthy the prediction. For highly non-normal X properties (e.g., fingerprints), the MD p-value is wildly inaccurate.

## Structural Similar Compounds

| Name                        | EPHEDRINE SULPHATE | ACETAMINOPHEN    | TOCAINIDE.HCL |
|-----------------------------|--------------------|------------------|---------------|
| Structure                   |                    |                  |               |
| Actual Endpoint (-log C)    | 4.42222            | 2.74809          | 3.28389       |
| Predicted Endpoint (-log C) | 3.18027            | 2.92206          | 2.93728       |
| Distance                    | 0.278              | 0.431            | 0.445         |
| Reference                   | NTP 307 41         | NTP REPORT # 394 | NDA-18257     |

## Model Applicability

Unknown features are fingerprint features in the query molecule, but not found or appearing too infrequently in the training set.

1. All properties and OPS components are within expected ranges.
2. Unknown ECFP\_6 feature: 2023785560: [\*]C([\*])O
3. Unknown ECFP\_6 feature: -222940837: [\*]C([\*])[C@H](O)[c](:[\*]):[\*]
4. Unknown ECFP\_6 feature: -261056708: [\*]C([\*])[C@H](C)N
5. Unknown ECFP\_6 feature: -933808133: [\*]C([\*])N
6. Unknown ECFP\_6 feature: -176846085: [\*]C([\*])[c](:[cH]:[\*]):[cH]:[\*]
7. Unknown ECFP\_6 feature: 1997021792: [\*]:[cH]:[cH]:[cH]:[\*]

## Feature Contribution

### Top features for positive contribution

| Fingerprint | Bit/Smiles | Feature Structure | Score |
|-------------|------------|-------------------|-------|
|             |            |                   |       |

|                                        |                   |                                                                                                                                                           |              |
|----------------------------------------|-------------------|-----------------------------------------------------------------------------------------------------------------------------------------------------------|--------------|
| FCFP_6                                 | 3                 | AND Enantiomer<br>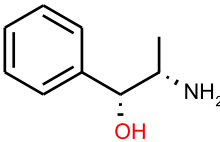<br><chem>[*]O</chem>                                | 0.0924       |
| FCFP_6                                 | -2093839777       | AND Enantiomer<br><br><chem>[*][c]1:[cH]:[cH]:[cH]:[cH]:[cH]:1</chem>  | 0.078        |
| ECFP_6                                 | 1572579716        | AND Enantiomer<br><br><chem>[*]N</chem>                                | 0.0576       |
| Top Features for negative contribution |                   |                                                                                                                                                           |              |
| <b>Fingerprint</b>                     | <b>Bit/Smiles</b> | <b>Feature Structure</b>                                                                                                                                  | <b>Score</b> |
| FCFP_6                                 | 991735244         | AND Enantiomer<br><br><chem>[*][c]1:[*]:[cH]:[cH]:[cH]:[cH]:1</chem> | -0.134       |
| ECFP_6                                 | 1564392544        | AND Enantiomer<br><br><chem>[*][c]1:[*]:[cH]:[cH]:[cH]:[cH]:1</chem> | -0.133       |

|        |             |                                                                                                                                                                                             |         |
|--------|-------------|---------------------------------------------------------------------------------------------------------------------------------------------------------------------------------------------|---------|
| FCFP_6 | -1698724694 | <p>AND Enantiomer</p> 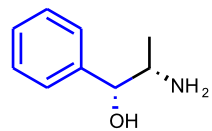 <p><chem>[*]C([*])(c1:[cH]:[cH]:[cH]:[cH]:[cH]:[cH])[C@H](O)[C@@H](N)C</chem></p> | -0.0944 |
|--------|-------------|---------------------------------------------------------------------------------------------------------------------------------------------------------------------------------------------|---------|

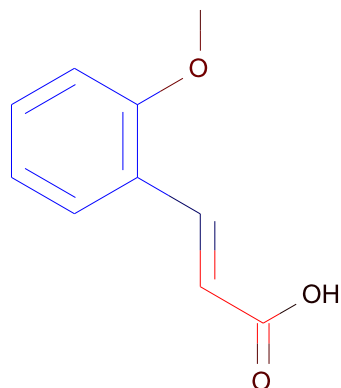
 $C_{10}H_{10}O_3$ 

Molecular Weight: 178.185

ALogP: 1.911

Rotatable Bonds: 3

Acceptors: 3

Donors: 1

## Model Prediction

Prediction: 0.069

Unit: g/kg\_body\_weight

Mahalanobis Distance: 14.9

Mahalanobis Distance p-value: 0.177

Mahalanobis Distance: The Mahalanobis distance (MD) is a generalization of the Euclidean distance that accounts for correlations among the X properties. It is calculated as the distance to the center of the training data. The larger the MD, the less trustworthy the prediction.

Mahalanobis Distance p-value: The p-value gives the fraction of training data with an MD greater than or equal to the one for the given sample, assuming normally distributed data. The smaller the p-value, the less trustworthy the prediction. For highly non-normal X properties (e.g., fingerprints), the MD p-value is wildly inaccurate.

## Structural Similar Compounds

| Name                        | 11                              | 2; 4-DICHLOROPHENOXY ACETIC ACID | EUGENOL          |
|-----------------------------|---------------------------------|----------------------------------|------------------|
| Structure                   |                                 |                                  |                  |
| Actual Endpoint (-log C)    | 3.91675                         | 4.64549                          | 2.73826          |
| Predicted Endpoint (-log C) | 3.52639                         | 3.88474                          | 3.36098          |
| Distance                    | 0.410                           | 0.421                            | 0.428            |
| Reference                   | EPA COVER SHEET 0067;890101;(1) | HEED ECAO CIN G035;8803;(1)      | NTP REPORT # 223 |

## Model Applicability

Unknown features are fingerprint features in the query molecule, but not found or appearing too infrequently in the training set.

1. All properties and OPS components are within expected ranges.
2. Unknown ECFP\_6 feature: -1905093414: [\*]=CC(=O)O
3. Unknown ECFP\_6 feature: -470416293: [\*]C=C\([\*])[\*]
4. Unknown ECFP\_6 feature: -1831055759: [\*]C=C\([\*])[\*]
5. Unknown ECFP\_6 feature: 1335702447: [\*][c]([\*]):[c](C=[\*]):[cH]:[\*]
6. Unknown ECFP\_6 feature: 1997021792: [\*]:[cH]:[cH]:[cH]:[\*]
7. Unknown ECFP\_6 feature: 1307307440: [\*]:[c]([\*])OC

## Feature Contribution

### Top features for positive contribution

| Fingerprint | Bit/Smiles | Feature Structure | Score |
|-------------|------------|-------------------|-------|
|             |            |                   |       |

|                                        |             |                                                                                                                                         |        |
|----------------------------------------|-------------|-----------------------------------------------------------------------------------------------------------------------------------------|--------|
| FCFP_6                                 | 451847724   | 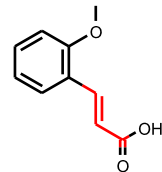<br><chem>[*]C(=CC(=[*]))([*])[*]</chem>             | 0.16   |
| FCFP_6                                 | -1176841573 | <br><chem>[*]=CC(=O)O</chem>                         | 0.0963 |
| ECFP_6                                 | -1925046727 | <br><chem>[*]C=[*]</chem>                            | 0.0915 |
| Top Features for negative contribution |             |                                                                                                                                         |        |
| Fingerprint                            | Bit/Smiles  | Feature Structure                                                                                                                       | Score  |
| FCFP_6                                 | 991735244   | <br><chem>[*][c]1:[*]:[cH]:[cH]:[cH]:[cH]:1</chem> | -0.134 |
| ECFP_6                                 | 1564392544  | <br><chem>[*][c]1:[*]:[cH]:[cH]:[cH]:[cH]:1</chem> | -0.133 |



|        |   |                                                                                                                                |        |
|--------|---|--------------------------------------------------------------------------------------------------------------------------------|--------|
| FCFP_6 | 1 | 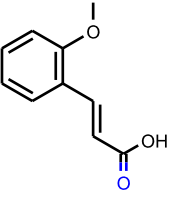 <p data-bbox="1465 321 1528 349">[*]=O</p> | -0.102 |
|--------|---|--------------------------------------------------------------------------------------------------------------------------------|--------|

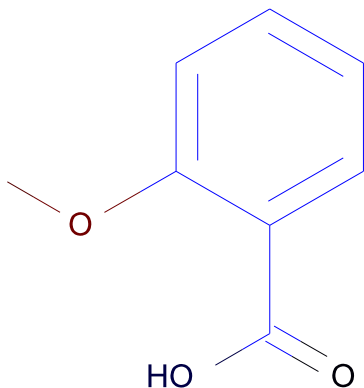
 $C_8H_8O_3$ 

Molecular Weight: 152.147

ALogP: 1.443

Rotatable Bonds: 2

Acceptors: 3

Donors: 1

### Model Prediction

Prediction: 0.269

Unit: g/kg\_body\_weight

Mahalanobis Distance: 16.4

Mahalanobis Distance p-value: 0.0121

Mahalanobis Distance: The Mahalanobis distance (MD) is a generalization of the Euclidean distance that accounts for correlations among the X properties. It is calculated as the distance to the center of the training data. The larger the MD, the less trustworthy the prediction.

Mahalanobis Distance p-value: The p-value gives the fraction of training data with an MD greater than or equal to the one for the given sample, assuming normally distributed data. The smaller the p-value, the less trustworthy the prediction. For highly non-normal X properties (e.g., fingerprints), the MD p-value is wildly inaccurate.

### Structural Similar Compounds

| Name                        | O-NITROANISOLE   | O-ANISIDINE .HCL | P-CRESIDINE      |
|-----------------------------|------------------|------------------|------------------|
| Structure                   |                  |                  |                  |
| Actual Endpoint (-log C)    | 3.74733          | 2.69251          | 3.26224          |
| Predicted Endpoint (-log C) | 3.48518          | 3.50794          | 3.63547          |
| Distance                    | 0.401            | 0.415            | 0.434            |
| Reference                   | NTP REPORT # 416 | NTP REPORT # 89  | NTP REPORT # 142 |

### Model Applicability

Unknown features are fingerprint features in the query molecule, but not found or appearing too infrequently in the training set.

1. All properties and OPS components are within expected ranges.
2. Unknown ECFP\_6 feature: 1997021792: [\*]:[cH]:[cH]:[cH]:[\*]
3. Unknown ECFP\_6 feature: 1429461619: [\*]:[c]:[\*])C(=O)O
4. Unknown ECFP\_6 feature: 1307307440: [\*]:[c]:[\*])OC

### Feature Contribution

| Top features for positive contribution |            |                   |        |
|----------------------------------------|------------|-------------------|--------|
| Fingerprint                            | Bit/Smiles | Feature Structure | Score  |
| ECFP_6                                 | 2099970318 | <br>[*]C(=O)[*]   | 0.0766 |

| FCFP_6                                 | 1036089772 | 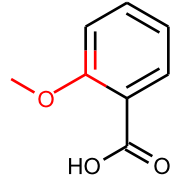<br><chem>[*]:[c](:[*])OC</chem>                       | 0.073  |
|----------------------------------------|------------|-------------------------------------------------------------------------------------------------------------------------------------------|--------|
| FCFP_6                                 | 136627117  | <br><chem>[*]OC</chem>                                 | 0.0538 |
| Top Features for negative contribution |            |                                                                                                                                           |        |
| Fingerprint                            | Bit/Smiles | Feature Structure                                                                                                                         | Score  |
| ECFP_6                                 | 1337040050 | <br><chem>[*]C(=[*])[c](:[cH]:[*]):[c]([*]):[*]</chem> | -0.158 |
| FCFP_6                                 | 991735244  | <br><chem>[*][c]1:[*]:[cH]:[cH]:[cH]:[cH]:1</chem>   | -0.134 |
| ECFP_6                                 | 1564392544 | <br><chem>[*][c]1:[*]:[cH]:[cH]:[cH]:[cH]:1</chem>   | -0.133 |



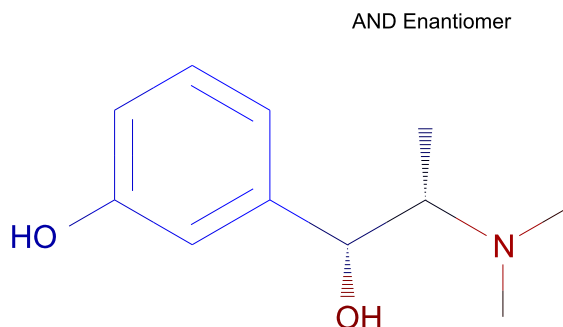

C<sub>11</sub>H<sub>17</sub>NO<sub>2</sub>  
Molecular Weight: 195.258  
ALogP: 1.528  
Rotatable Bonds: 3  
Acceptors: 3  
Donors: 2

## Model Prediction

Prediction: 0.0937  
Unit: g/kg\_body\_weight  
Mahalanobis Distance: 22.4  
Mahalanobis Distance p-value: 5.03e-011

**Mahalanobis Distance:** The Mahalanobis distance (MD) is a generalization of the Euclidean distance that accounts for correlations among the  $X$  properties. It is calculated as the distance to the center of the training data. The larger the MD, the less trustworthy the prediction.

**Mahalanobis Distance p-value:** The p-value gives the fraction of training data with an MD greater than or equal to the one for the given sample, assuming normally distributed data. The smaller the p-value, the less trustworthy the prediction. For highly non-normal  $X$  properties (e.g., fingerprints), the MD p-value is wildly inaccurate.

## Structural Similar Compounds

| Name                        | EPHEDRINE SULPHATE                                                                  | PHENYLEPHRINE .HCL                                                                  | TOCAINIDE.HCL                                                                       |
|-----------------------------|-------------------------------------------------------------------------------------|-------------------------------------------------------------------------------------|-------------------------------------------------------------------------------------|
| Structure                   | 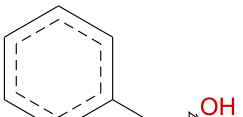 |  |  |
| Actual Endpoint (-log C)    | 4.42222                                                                             | 3.7319                                                                              | 3.28389                                                                             |
| Predicted Endpoint (-log C) | 3.18027                                                                             | 3.37392                                                                             | 2.93728                                                                             |
| Distance                    | 0.423                                                                               | 0.423                                                                               | 0.503                                                                               |
| Reference                   | NTP 307 41                                                                          | NTP REPORT # 322                                                                    | NDA-18257                                                                           |

## Model Applicability

Unknown features are fingerprint features in the query molecule, but not found or appearing too infrequently in the training set.

1. OPS PC11 out of range. Value: 6.9229. Training min, max, SD, explained variance: -6.5761, 6.1703, 2.258, 0.0223.
2. Unknown ECFP\_6 feature: 2023785560: [\*]C([\*])O
3. Unknown ECFP\_6 feature: -222940837: [\*]C([\*])[C@H](O)[c](:[\*]):[\*]
4. Unknown ECFP\_6 feature: -1280034494: [\*]C([\*])[C@H](C)N([\*])[\*]
5. Unknown ECFP\_6 feature: 1064495017: [\*]C([\*])N(C)C
6. Unknown ECFP\_6 feature: -176846085: [\*]C([\*])[c](:[cH]:[\*]):[cH]:[\*]
7. Unknown ECFP\_6 feature: 1997021792: [\*]:[cH]:[cH]:[cH]:[\*]
8. Unknown ECFP\_6 feature: -177786161: [\*]:[cH]:[c](O):[cH]:[\*]
9. Unknown ECFP\_6 feature: 2019062761: [\*]:[c](:[\*])O

## Feature Contribution

| Top features for positive contribution |            |                   |       |
|----------------------------------------|------------|-------------------|-------|
| Fingerprint                            | Bit/Smiles | Feature Structure | Score |
|                                        |            |                   |       |

| FCFP_6                                 | 3          | <p>AND Enantiomer</p> 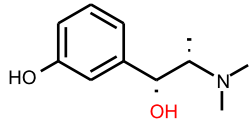 <p>[*]O</p>                                           | 0.0924  |
|----------------------------------------|------------|-----------------------------------------------------------------------------------------------------------------------------------------------------------------|---------|
| FCFP_6                                 | 9          | <p>AND Enantiomer</p>  <p>[*]N([*])[*]</p>                                   | 0.0797  |
| ECFP_6                                 | 2007300961 | <p>AND Enantiomer</p>  <p>[*][c]1:[*]:[c]([*]):<br/>[cH]:[cH]:[cH]:1</p>     | 0.0564  |
| Top Features for negative contribution |            |                                                                                                                                                                 |         |
| Fingerprint                            | Bit/Smiles | Feature Structure                                                                                                                                               | Score   |
| FCFP_6                                 | 991735244  | <p>AND Enantiomer</p>  <p>[*][c]1:[*]:[cH]:[cH]<br/>:[cH]:[cH]:1</p>       | -0.134  |
| FCFP_6                                 | -453677277 | <p>AND Enantiomer</p>  <p>[*]C([*])[c]1:[cH]:[*]<br/>:[cH]:[cH]:[cH]:1</p> | -0.0906 |

|        |           |                                                                                                                                          |         |
|--------|-----------|------------------------------------------------------------------------------------------------------------------------------------------|---------|
| FCFP_6 | 136597326 | <p>AND Enantiomer</p> 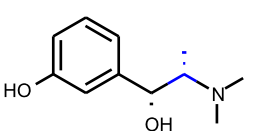 <p><chem>[*]C([*])C</chem></p> | -0.0815 |
|--------|-----------|------------------------------------------------------------------------------------------------------------------------------------------|---------|

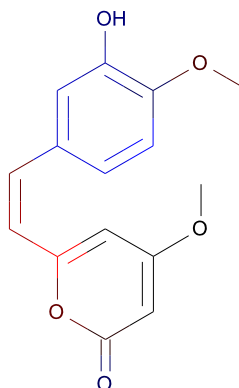
 $C_{15}H_{14}O_5$ 

Molecular Weight: 274.269

ALogP: 1.969

Rotatable Bonds: 4

Acceptors: 5

Donors: 1

### Model Prediction

Prediction: 0.0261

Unit: g/kg\_body\_weight

Mahalanobis Distance: 26.7

Mahalanobis Distance p-value: 1.24e-018

Mahalanobis Distance: The Mahalanobis distance (MD) is a generalization of the Euclidean distance that accounts for correlations among the X properties. It is calculated as the distance to the center of the training data. The larger the MD, the less trustworthy the prediction.

Mahalanobis Distance p-value: The p-value gives the fraction of training data with an MD greater than or equal to the one for the given sample, assuming normally distributed data. The smaller the p-value, the less trustworthy the prediction. For highly non-normal X properties (e.g., fingerprints), the MD p-value is wildly inaccurate.

### Structural Similar Compounds

| Name                        | NALIDIXIC ACID   | 11                              | DIMETHYL PHTHALATE           |
|-----------------------------|------------------|---------------------------------|------------------------------|
| Structure                   |                  |                                 |                              |
| Actual Endpoint (-log C)    | 3.36594          | 3.91675                         | 1.68616                      |
| Predicted Endpoint (-log C) | 4.24773          | 3.52639                         | 2.46505                      |
| Distance                    | 0.547            | 0.585                           | 0.587                        |
| Reference                   | NTP REPORT # 368 | EPA COVER SHEET 0067;890101;(1) | AWQCD ECAO CIN H066;8710;(5) |

### Model Applicability

Unknown features are fingerprint features in the query molecule, but not found or appearing too infrequently in the training set.

1. All properties and OPS components are within expected ranges.
2. Unknown ECFP\_6 feature: -176483725: [\*]=C[c](:[cH]:[\*]):[cH]:[\*]
3. Unknown ECFP\_6 feature: 2019062761: [\*]:[c](:[\*])O
4. Unknown ECFP\_6 feature: -1831055759: [\*]\C=C\[c](:[\*]):[\*]
5. Unknown ECFP\_6 feature: -1053980253: [\*]O\C(=C\[\*])\C=[\*]
6. Unknown ECFP\_6 feature: -560785749: [\*]C(=[\*])OC(=[\*])[\*]
7. Unknown ECFP\_6 feature: -1885846789: [\*]OC(=O)C=[\*]
8. Unknown ECFP\_6 feature: 464808839: [\*]C(=CC(=[\*])[\*])[\*]
9. Unknown ECFP\_6 feature: -444332269: [\*]O\C(=C\[\*])\C=[\*]
10. Unknown ECFP\_6 feature: 1307307440: [\*]:[c](:[\*])OC

### Feature Contribution

#### Top features for positive contribution

| Fingerprint | Bit/Smiles | Feature Structure | Score |
|-------------|------------|-------------------|-------|
|             |            |                   |       |



| FCFP_6                                 | 451847724   | 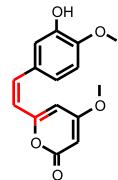<br><chem>[*]C(=CC(=[*]))[*]]</chem> | 0.16   |
|----------------------------------------|-------------|-------------------------------------------------------------------------------------------------------------------------|--------|
| FCFP_6                                 | -1143715940 | <br><chem>[*]C(=[*])OC(=[*])</chem>  | 0.13   |
| ECFP_6                                 | -1925046727 | <br><chem>[*]C=[*]</chem>            | 0.0915 |
| Top Features for negative contribution |             |                                                                                                                         |        |
| Fingerprint                            | Bit/Smiles  | Feature Structure                                                                                                       | Score  |
| ECFP_6                                 | 2106656448  | <br><chem>[*]C(=O)[*]</chem>       | -0.11  |
| FCFP_6                                 | 1           | <br><chem>[*]=O</chem>             | -0.102 |

FCFP\_6

-453677277

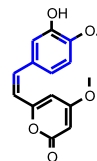

[\*]C([\*])[c]1:[cH]:[\*]  
]:[cH]:[cH]:[cH]:1

-0.0906

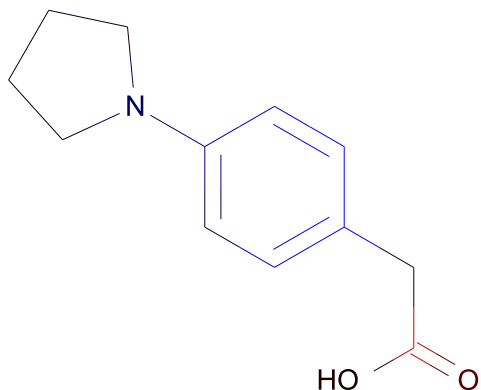

C12H15NO2  
 Molecular Weight: 205.253  
 ALogP: 2.117  
 Rotatable Bonds: 3  
 Acceptors: 3  
 Donors: 1

## Model Prediction

Prediction: 0.0467

Unit: g/kg\_body\_weight

Mahalanobis Distance: 25.2

Mahalanobis Distance p-value: 5.48e-016

**Mahalanobis Distance:** The Mahalanobis distance (MD) is a generalization of the Euclidean distance that accounts for correlations among the X properties. It is calculated as the distance to the center of the training data. The larger the MD, the less trustworthy the prediction.

Mahalanobis Distance p-value: The p-value gives the fraction of training data with an MD greater than or equal to the one for the given sample, assuming normally distributed data. The smaller the p-value, the less trustworthy the prediction. For highly non-normal X properties (e.g., fingerprints), the MD p-value is wildly inaccurate.

## Structural Similar Compounds

| Name                        | 2; 4-DICHLOROPHENOXY ACETIC ACID                                                    | 11                                                                                  | DICHLOROPROP                                                                        |
|-----------------------------|-------------------------------------------------------------------------------------|-------------------------------------------------------------------------------------|-------------------------------------------------------------------------------------|
| Structure                   | 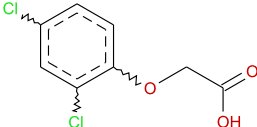 |  |  |
| Actual Endpoint (-log C)    | 4.64549                                                                             | 3.91675                                                                             | 3.97324                                                                             |
| Predicted Endpoint (-log C) | 3.88474                                                                             | 3.52639                                                                             | 3.57411                                                                             |
| Distance                    | 0.456                                                                               | 0.488                                                                               | 0.510                                                                               |
| Reference                   | HEED ECAO CIN<br>G035;8803;(1)                                                      | EPA COVER SHEET<br>0067;890101;(1)                                                  | HEEP ECAO CIN<br>P079;8408;(2)                                                      |

## Model Applicability

Unknown features are fingerprint features in the query molecule, but not found or appearing too infrequently in the training set.

1. OPS PC13 out of range. Value: 6.8267. Training min, max, SD, explained variance: -5.6594, 6.6668, 2.119, 0.0196.
2. Unknown ECFP\_6 feature: 1731135544: [\*]CC(=O)O
3. Unknown ECFP\_6 feature: 771857573: [\*]C(=[\*])C[c](:[\*]):[\*]
4. Unknown ECFP\_6 feature: -175021654: [\*]N([\*])[c](:[cH]:[\*]):[cH]:[\*]
5. Unknown ECFP\_6 feature: 1951894094: [\*]:[c](:[\*])N1C[\*][\*]C1
6. Unknown ECFP\_6 feature: -757679000: [\*]N1[\*][\*]CC1
7. Unknown ECFP\_6 feature: -1332781180: [\*]1[\*]CCCC1

## Feature Contribution

## Top features for positive contribution

| Fingerprint | Bit/Smiles | Feature Structure | Score |
|-------------|------------|-------------------|-------|
|             |            |                   |       |

|                                        |             |                                                                                                                                                    |         |
|----------------------------------------|-------------|----------------------------------------------------------------------------------------------------------------------------------------------------|---------|
| ECFP_6                                 | 1559650422  | 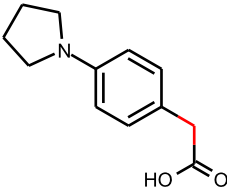<br><chem>[*]C[*]</chem>                                        | 0.129   |
| FCFP_6                                 | -1176841573 | <br><chem>[*]=CC(=O)O</chem>                                    | 0.0963  |
| ECFP_6                                 | 2099970318  | <br><chem>[*]C(=O)[*]</chem>                                    | 0.0766  |
| Top Features for negative contribution |             |                                                                                                                                                    |         |
| Fingerprint                            | Bit/Smiles  | Feature Structure                                                                                                                                  | Score   |
| FCFP_6                                 | 1           | <br><chem>[*]=O</chem>                                        | -0.102  |
| FCFP_6                                 | -453677277  | <br><chem>[*]C([*])[c]1:[cH]:[*]<br/>:[cH]:[cH]:[cH]:1</chem> | -0.0906 |

FCFP\_6

203677720

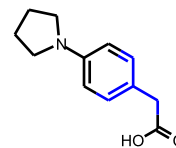

[\*]C([\*])[c](:[cH]:[\*]  
):[cH]:[\*]

-0.0713

AND Enantiomer

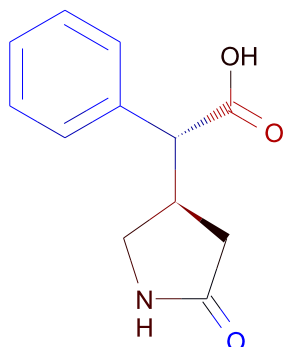 $C_{12}H_{13}NO_3$ 

Molecular Weight: 219.237

ALogP: 0.621

Rotatable Bonds: 3

Acceptors: 3

Donors: 2

## Model Prediction

Prediction: 0.0959

Unit: g/kg\_body\_weight

Mahalanobis Distance: 26.8

Mahalanobis Distance p-value: 7.21e-019

Mahalanobis Distance: The Mahalanobis distance (MD) is a generalization of the Euclidean distance that accounts for correlations among the X properties. It is calculated as the distance to the center of the training data. The larger the MD, the less trustworthy the prediction.

Mahalanobis Distance p-value: The p-value gives the fraction of training data with an MD greater than or equal to the one for the given sample, assuming normally distributed data. The smaller the p-value, the less trustworthy the prediction. For highly non-normal X properties (e.g., fingerprints), the MD p-value is wildly inaccurate.

## Structural Similar Compounds

| Name                        | 3-AMINO-4-ETHOXYACETANILIDE | P-PHTHALIC ACID                | TOCAINIDE.HCL |
|-----------------------------|-----------------------------|--------------------------------|---------------|
| Structure                   |                             |                                |               |
| Actual Endpoint (-log C)    | 2.9873                      | 2.52148                        | 3.28389       |
| Predicted Endpoint (-log C) | 3.01152                     | 2.63704                        | 2.93728       |
| Distance                    | 0.461                       | 0.519                          | 0.527         |
| Reference                   | NTP 112 C-11                | HEEP ECAO CIN<br>P190;8608;(2) | NDA-18257     |

## Model Applicability

Unknown features are fingerprint features in the query molecule, but not found or appearing too infrequently in the training set.

1. All properties and OPS components are within expected ranges.
2. Unknown ECFP\_6 feature: -154530762: [\*]N[\*]
3. Unknown ECFP\_6 feature: -1694930393: [\*]=C1[\*][\*]CN1
4. Unknown ECFP\_6 feature: -742538367: O=C1C[\*][\*]N1
5. Unknown ECFP\_6 feature: 53207596: [\*]C([\*])CC(=[\*])[\*]
6. Unknown ECFP\_6 feature: -858846751: [\*]C([\*])C1C[\*][\*]C1
7. Unknown ECFP\_6 feature: -1457159889: [\*][C@H]1[\*][\*]NC1
8. Unknown ECFP\_6 feature: -1905455774: [\*]C([\*])C(=O)O
9. Unknown ECFP\_6 feature: 1603312431: [\*]C([\*])[C@H](C(=[\*])[\*])[c](:[\*]):[\*]
10. Unknown ECFP\_6 feature: -176846085: [\*]C([\*])[c](:[cH]:[\*]):[cH]:[\*]
11. Unknown ECFP\_6 feature: 1997021792: [\*]:[cH]:[cH]:[cH]:[\*]

## Feature Contribution

### Top features for positive contribution

| Fingerprint | Bit/Smiles | Feature Structure | Score |
|-------------|------------|-------------------|-------|
|             |            |                   |       |

|                                        |                   |                                                                                                                                                           |              |
|----------------------------------------|-------------------|-----------------------------------------------------------------------------------------------------------------------------------------------------------|--------------|
| ECFP_6                                 | -167460056        | <p>AND Enantiomer</p> 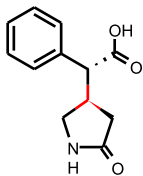 <p>[*]C([*])[*]</p>                             | 0.136        |
| FCFP_6                                 | -1176841573       | <p>AND Enantiomer</p>  <p>[*]=CC(=O)O</p>                              | 0.0963       |
| FCFP_6                                 | 3                 | <p>AND Enantiomer</p>  <p>[*]O</p>                                     | 0.0924       |
| Top Features for negative contribution |                   |                                                                                                                                                           |              |
| <b>Fingerprint</b>                     | <b>Bit/Smiles</b> | <b>Feature Structure</b>                                                                                                                                  | <b>Score</b> |
| FCFP_6                                 | 991735244         | <p>AND Enantiomer</p>  <p>[*][c]1:[*]:[cH]:[cH]<br/>:[cH]:[cH]:1</p> | -0.134       |
| ECFP_6                                 | 1564392544        | <p>AND Enantiomer</p>  <p>[*][c]1:[*]:[cH]:[cH]<br/>:[cH]:[cH]:1</p> | -0.133       |

|        |            |                                                                                                                              |       |
|--------|------------|------------------------------------------------------------------------------------------------------------------------------|-------|
| ECFP_6 | 2106656448 | <p>AND Enantiomer</p> 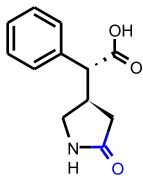 <p>[*]C(=O)[*]</p> | -0.11 |
|--------|------------|------------------------------------------------------------------------------------------------------------------------------|-------|



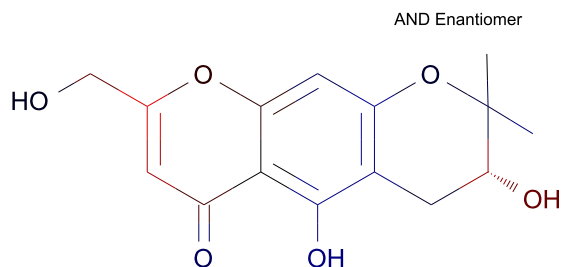

$C_{15}H_{16}O_6$

Molecular Weight: 292.284

ALogP: 0.901

Rotatable Bonds: 1

Acceptors: 6

Donors: 3

## Model Prediction

Prediction: 0.0104

Unit: g/kg\_body\_weight

Mahalanobis Distance: 28.5

Mahalanobis Distance p-value: 5.37e-022

Mahalanobis Distance: The Mahalanobis distance (MD) is a generalization of the Euclidean distance that accounts for correlations among the X properties. It is calculated as the distance to the center of the training data. The larger the MD, the less trustworthy the prediction.

Mahalanobis Distance p-value: The p-value gives the fraction of training data with an MD greater than or equal to the one for the given sample, assuming normally distributed data. The smaller the p-value, the less trustworthy the prediction. For highly non-normal X properties (e.g., fingerprints), the MD p-value is wildly inaccurate.

## Structural Similar Compounds

| Name                        | NALTREXONE.HCL | PROPYL GALLATE   | ZERANOL                                  |
|-----------------------------|----------------|------------------|------------------------------------------|
| Structure                   |                |                  |                                          |
| Actual Endpoint (-log C)    | 4.05615        | 2.84963          | 4.20737                                  |
| Predicted Endpoint (-log C) | 4.77886        | 2.91297          | 3.4948                                   |
| Distance                    | 0.612          | 0.619            | 0.646                                    |
| Reference                   | NDA-18932      | NTP REPORT # 240 | REGULAT. TOXICOL. PHARMACOL. 1983; 3: 9- |

## Model Applicability

Unknown features are fingerprint features in the query molecule, but not found or appearing too infrequently in the training set.

1. All properties and OPS components are within expected ranges.
2. Unknown ECFP\_6 feature: -1660340418: [\*]C[c]([\*]):[\*]:[\*]([\*]):[\*]
3. Unknown ECFP\_6 feature: -570915357: [\*]O[c]([\*]):[\*]:[\*]([\*]):[\*]
4. Unknown ECFP\_6 feature: -813997308: [\*]C(=O)[c]([\*]):[\*]:[\*]([\*]):[\*]
5. Unknown ECFP\_6 feature: -1660913849: [\*]c([\*]):[\*]([\*]):[\*]([\*]):[\*]
6. Unknown ECFP\_6 feature: -560785749: [\*]C(=O)OC(=O)[\*]
7. Unknown ECFP\_6 feature: 1875238785: [\*]C\C(=O)[\*]O[\*]
8. Unknown ECFP\_6 feature: 464808839: [\*]C(=CC(=O)[\*])[\*]
9. Unknown ECFP\_6 feature: 1299558496: [\*]C(=O)C(=O)C(=O)[\*]
10. Unknown ECFP\_6 feature: 2019062761: [\*]c([\*])O
11. Unknown ECFP\_6 feature: 53207596: [\*]C([\*])CC(=O)[\*]
12. Unknown ECFP\_6 feature: -1051556861: [\*]C[C@H](O)C([\*])([\*])[\*]
13. Unknown ECFP\_6 feature: 1778376725: [\*]OC(C)(C)C([\*])[\*]
14. Unknown ECFP\_6 feature: -200406221: [\*]C([\*])([\*])O[c]([\*]):[\*]:[\*]
15. Unknown ECFP\_6 feature: 2024749573: [\*]C([\*])O
16. Unknown ECFP\_6 feature: 859433814: [\*]C([\*])([\*])C
17. Unknown ECFP\_6 feature: 769217534: [\*]C(=O)CO
18. Unknown ECFP\_6 feature: 2022454958: [\*]CO

## Feature Contribution

| Top features for positive contribution |            |                                                                                                                                     |       |
|----------------------------------------|------------|-------------------------------------------------------------------------------------------------------------------------------------|-------|
| Fingerprint                            | Bit/Smiles | Feature Structure                                                                                                                   | Score |
| FCFP_6                                 | 451847724  | <p>AND Enantiomer</p> 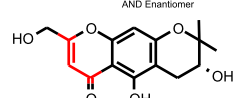 <p>[*]C(=CC(=[*]))[*]</p> | 0.16  |
| ECFP_6                                 | 167460056  | <p>AND Enantiomer</p>  <p>[*]C([*])[*]</p>       | 0.136 |
| ECFP_6                                 | 1559650422 | <p>AND Enantiomer</p>  <p>[*]C[*]</p>            | 0.129 |
| Top Features for negative contribution |            |                                                                                                                                     |       |
| Fingerprint                            | Bit/Smiles | Feature Structure                                                                                                                   | Score |
| ECFP_6                                 | 2106656448 | <p>AND Enantiomer</p>  <p>[*]C(=O)[*]</p>      | -0.11 |

|        |           |                                                                                                                             |         |
|--------|-----------|-----------------------------------------------------------------------------------------------------------------------------|---------|
| FCFP_6 | 1         | <p>AND Enantiomer</p> 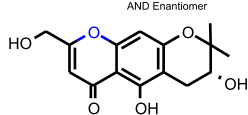 <p>[*]=O</p>      | -0.102  |
| FCFP_6 | 136597326 | <p>AND Enantiomer</p>  <p>[*]C([*])C</p> | -0.0815 |

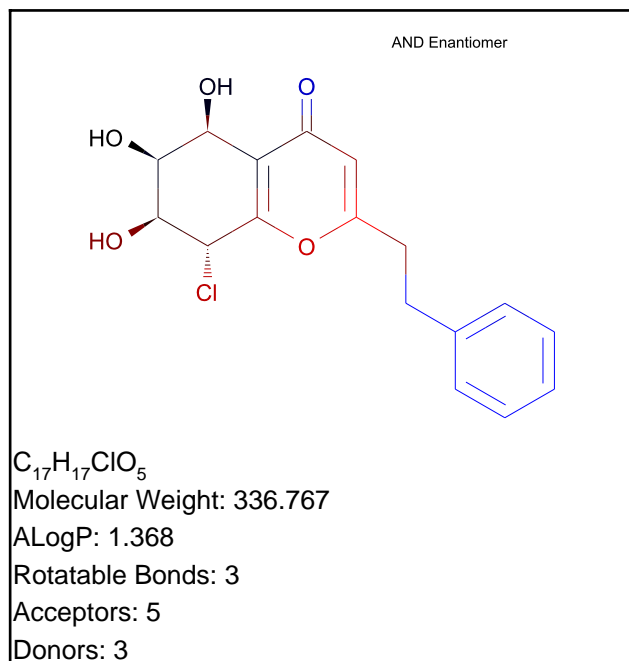

### Model Prediction

Prediction: 0.0201

Unit: g/kg\_body\_weight

Mahalanobis Distance: 26.8

Mahalanobis Distance p-value: 8.04e-019

Mahalanobis Distance: The Mahalanobis distance (MD) is a generalization of the Euclidean distance that accounts for correlations among the X properties. It is calculated as the distance to the center of the training data. The larger the MD, the less trustworthy the prediction.

Mahalanobis Distance p-value: The p-value gives the fraction of training data with an MD greater than or equal to the one for the given sample, assuming normally distributed data. The smaller the p-value, the less trustworthy the prediction. For highly non-normal X properties (e.g., fingerprints), the MD p-value is wildly inaccurate.

### Structural Similar Compounds

| Name                        | NALTREXONE.HCL                                                                      | PROPYL GALLATE                                                                      | ZEARALENONE                                                                         |
|-----------------------------|-------------------------------------------------------------------------------------|-------------------------------------------------------------------------------------|-------------------------------------------------------------------------------------|
| Structure                   | 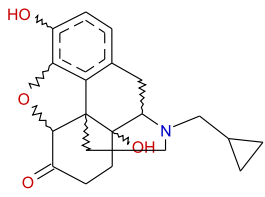 |  |  |
| Actual Endpoint (-log C)    | 4.05615                                                                             | 2.84963                                                                             | 5.40602                                                                             |
| Predicted Endpoint (-log C) | 4.77886                                                                             | 2.91297                                                                             | 3.57081                                                                             |
| Distance                    | 0.585                                                                               | 0.627                                                                               | 0.653                                                                               |
| Reference                   | NDA-18932                                                                           | NTP REPORT # 240                                                                    | NTP REPORT # 235                                                                    |

### Model Applicability

Unknown features are fingerprint features in the query molecule, but not found or appearing too infrequently in the training set.

1. All properties and OPS components are within expected ranges.
2. Unknown ECFP\_6 feature: 1875238785: [\*]C\C(=C[\*])\O[\*]
3. Unknown ECFP\_6 feature: 464808839: [\*]C(=CC(=[\*])[\*])[\*]
4. Unknown ECFP\_6 feature: 1299558496: [\*]C(=[\*])C(=O)C=[\*]
5. Unknown ECFP\_6 feature: 1795792463: [\*]C([\*])C(=C([\*])[\*])C(=[\*])[\*]
6. Unknown ECFP\_6 feature: -1567907747: [\*]C([\*])C@H(O)C(=[\*])[\*]
7. Unknown ECFP\_6 feature: 305695353: [\*]C([\*])C(O)C([\*])[\*]
8. Unknown ECFP\_6 feature: -7106223: [\*]C([\*])C@H(Cl)C(=[\*])[\*]
9. Unknown ECFP\_6 feature: 1652274794: [\*]OC(=C([\*])[\*])C([\*])[\*]
10. Unknown ECFP\_6 feature: -560785749: [\*]C(=[\*])OC(=[\*])[\*]
11. Unknown ECFP\_6 feature: 2024749573: [\*]C([\*])O
12. Unknown ECFP\_6 feature: -1795525632: [\*]CCC(=[\*])[\*]
13. Unknown ECFP\_6 feature: 1997021792: [\*]:[cH]:[cH]:[cH]:[\*]
14. Unknown ECFP\_6 feature: 105634199: [\*]C([\*])Cl

### Feature Contribution

#### Top features for positive contribution

| Fingerprint | Bit/Smiles | Feature Structure | Score |
|-------------|------------|-------------------|-------|
|             |            |                   |       |

|                                        |             |                                                                                                                                                           |        |
|----------------------------------------|-------------|-----------------------------------------------------------------------------------------------------------------------------------------------------------|--------|
| FCFP_6                                 | 451847724   | <p>AND Enantiomer</p> 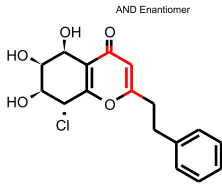 <p>[*]C(=CC(=[*]))[*]</p>                       | 0.16   |
| ECFP_6                                 | -167460056  | <p>AND Enantiomer</p>  <p>[*]C([*])[*]</p>                             | 0.136  |
| FCFP_6                                 | -1143715940 | <p>AND Enantiomer</p>  <p>[*]C(=[*])OC(=[*])[*]</p>                    | 0.13   |
| Top Features for negative contribution |             |                                                                                                                                                           |        |
| Fingerprint                            | Bit/Smiles  | Feature Structure                                                                                                                                         | Score  |
| FCFP_6                                 | 991735244   | <p>AND Enantiomer</p>  <p>[*][c]1:[*]:[cH]:[cH]<br/>:[cH]:[cH]:1</p> | -0.134 |
| ECFP_6                                 | 1564392544  | <p>AND Enantiomer</p>  <p>[*][c]1:[*]:[cH]:[cH]<br/>:[cH]:[cH]:1</p> | -0.133 |

|        |            |                                                                                                                              |       |
|--------|------------|------------------------------------------------------------------------------------------------------------------------------|-------|
| ECFP_6 | 2106656448 | <p>AND Enantiomer</p> 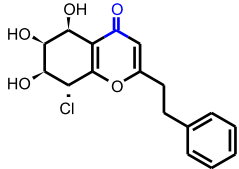 <p>[*]C(=O)[*]</p> | -0.11 |
|--------|------------|------------------------------------------------------------------------------------------------------------------------------|-------|

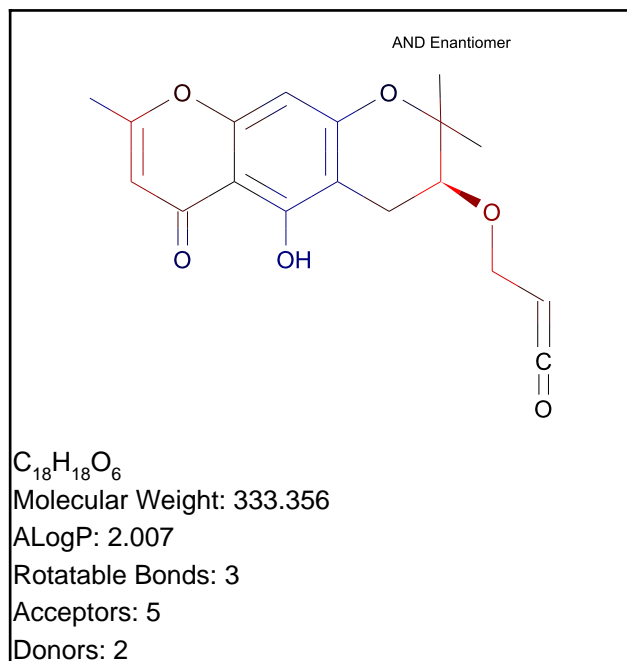

## Model Prediction

Prediction: 0.0112

Unit: g/kg\_body\_weight

Mahalanobis Distance: 31

Mahalanobis Distance p-value: 1.57e-026

Mahalanobis Distance: The Mahalanobis distance (MD) is a generalization of the Euclidean distance that accounts for correlations among the X properties. It is calculated as the distance to the center of the training data. The larger the MD, the less trustworthy the prediction.

Mahalanobis Distance p-value: The p-value gives the fraction of training data with an MD greater than or equal to the one for the given sample, assuming normally distributed data. The smaller the p-value, the less trustworthy the prediction. For highly non-normal X properties (e.g., fingerprints), the MD p-value is wildly inaccurate.

## Structural Similar Compounds

| Name                        | NALTREXONE.HCL                                                                      | ZEARALENONE                                                                         | NALIDIXIC ACID                                                                      |
|-----------------------------|-------------------------------------------------------------------------------------|-------------------------------------------------------------------------------------|-------------------------------------------------------------------------------------|
| Structure                   | 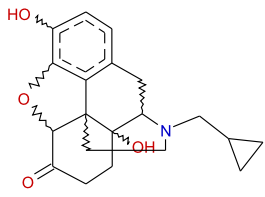 |  |  |
| Actual Endpoint (-log C)    | 4.05615                                                                             | 5.40602                                                                             | 3.36594                                                                             |
| Predicted Endpoint (-log C) | 4.77886                                                                             | 3.57081                                                                             | 4.24773                                                                             |
| Distance                    | 0.462                                                                               | 0.571                                                                               | 0.644                                                                               |
| Reference                   | NDA-18932                                                                           | NTP REPORT # 235                                                                    | NTP REPORT # 368                                                                    |

## Model Applicability

Unknown features are fingerprint features in the query molecule, but not found or appearing too infrequently in the training set.

1. All properties and OPS components are within expected ranges.
2. Unknown FCFP\_2 feature: 444624378: [\*]C=C=O
3. Unknown ECFP\_6 feature: -1114776580: [\*]=C=O
4. Unknown ECFP\_6 feature: -1660340418: [\*]C[C]([\*])([\*]):[\*]([\*]):[\*]
5. Unknown ECFP\_6 feature: -570915357: [\*]O[C]([\*])([\*]):[\*]([\*]):[\*]
6. Unknown ECFP\_6 feature: -813997308: [\*]C(=O)[C]([\*])([\*]):[\*]([\*]):[\*]
7. Unknown ECFP\_6 feature: -1660913849: [\*][C]([\*])([\*]):[\*]([\*]):[\*]
8. Unknown ECFP\_6 feature: -560785749: [\*]C(=O)OC(=O)[\*]
9. Unknown ECFP\_6 feature: -331149802: [\*]O\C(=O)[\*]C
10. Unknown ECFP\_6 feature: 464808839: [\*]C(=CC(=O)[\*])[\*]
11. Unknown ECFP\_6 feature: 1299558496: [\*]C(=O)C(=O)C=O
12. Unknown ECFP\_6 feature: 53207596: [\*]C([\*])CC(=O)[\*]
13. Unknown ECFP\_6 feature: -2124995946: [\*]C[C@H](O)[\*]C([\*])([\*])[\*]
14. Unknown ECFP\_6 feature: 1778376725: [\*]OC(C)(C)[\*]
15. Unknown ECFP\_6 feature: -200406221: [\*]C([\*])([\*])O[C]([\*]):[\*]:[\*]
16. Unknown ECFP\_6 feature: 859433814: [\*]C([\*])([\*])C
17. Unknown ECFP\_6 feature: 2019062761: [\*]:[C]([\*])O
18. Unknown ECFP\_6 feature: -1591590376: [\*]C=C=O
19. Unknown ECFP\_6 feature: 2106995136: [\*]=C=O
20. Unknown ECFP\_6 feature: -91536905: [\*]CC=C=O

21. Unknown ECFP\_6 feature: -1688150664: [\*]OCC=[\*]  
 22. Unknown ECFP\_6 feature: -1250019913: [\*]COC([\*])[\*]

## Feature Contribution

### Top features for positive contribution

| Fingerprint | Bit/Smiles  | Feature Structure                                                                                                                       | Score |
|-------------|-------------|-----------------------------------------------------------------------------------------------------------------------------------------|-------|
| FCFP_6      | 451847724   | <p>AND Enantiomer</p> 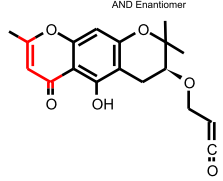 <p>[*]C(=CC(=[*]))[*]</p>     | 0.16  |
| ECFP_6      | -167460056  | <p>AND Enantiomer</p>  <p>[*]C([*])[*]</p>           | 0.136 |
| FCFP_6      | -1143715940 | <p>AND Enantiomer</p>  <p>[*]C(=[*])OC(=[*])[*]</p> | 0.13  |

### Top Features for negative contribution

| Fingerprint | Bit/Smiles | Feature Structure                                                                                                              | Score |
|-------------|------------|--------------------------------------------------------------------------------------------------------------------------------|-------|
| ECFP_6      | 2106656448 | <p>AND Enantiomer</p> 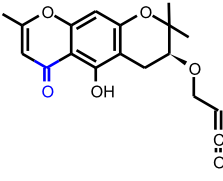 <p>[*]C(=O)[*]</p> | -0.11 |



|        |           |                                                                                                                             |         |
|--------|-----------|-----------------------------------------------------------------------------------------------------------------------------|---------|
| FCFP_6 | 1         | <p>AND Enantiomer</p> 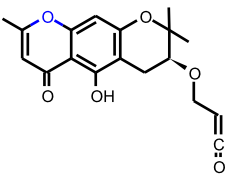 <p>[*]=O</p>      | -0.102  |
| FCFP_6 | 136597326 | <p>AND Enantiomer</p>  <p>[*]C([*])C</p> | -0.0815 |

AND Enantiomer

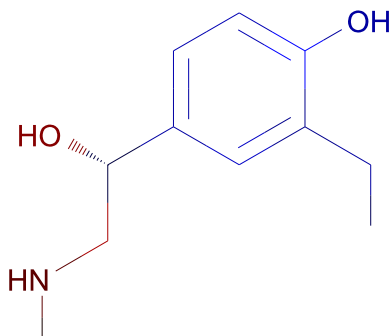C<sub>11</sub>H<sub>17</sub>NO<sub>2</sub>

Molecular Weight: 195.258

ALogP: 1.557

Rotatable Bonds: 4

Acceptors: 3

Donors: 3

## Model Prediction

Prediction: 0.0809

Unit: g/kg\_body\_weight

Mahalanobis Distance: 19

Mahalanobis Distance p-value: 1.11e-005

Mahalanobis Distance: The Mahalanobis distance (MD) is a generalization of the Euclidean distance that accounts for correlations among the X properties. It is calculated as the distance to the center of the training data. The larger the MD, the less trustworthy the prediction.

Mahalanobis Distance p-value: The p-value gives the fraction of training data with an MD greater than or equal to the one for the given sample, assuming normally distributed data. The smaller the p-value, the less trustworthy the prediction. For highly non-normal X properties (e.g., fingerprints), the MD p-value is wildly inaccurate.

## Structural Similar Compounds

| Name                        | PHENYLEPHRINE .HCL | ALBUTEROL.SULFATE | ALPHA-METHYLDOPASESQUITT YDRATE |
|-----------------------------|--------------------|-------------------|---------------------------------|
| Structure                   |                    |                   |                                 |
| Actual Endpoint (-log C)    | 3.7319             | 4.37897           | 3.03293                         |
| Predicted Endpoint (-log C) | 3.37392            | 3.92079           | 2.95075                         |
| Distance                    | 0.307              | 0.427             | 0.475                           |
| Reference                   | NTP REPORT # 322   | NDA-19269         | NTP REPORT # 348                |

## Model Applicability

Unknown features are fingerprint features in the query molecule, but not found or appearing too infrequently in the training set.

1. All properties and OPS components are within expected ranges.
2. Unknown ECFP\_6 feature: -2024509555: [\*]C[c](:[cH]:[\*]):[c]([\*]):[\*]
3. Unknown ECFP\_6 feature: -176846085: [\*]C([\*])[c](:[cH]:[\*]):[cH]:[\*]
4. Unknown ECFP\_6 feature: 2019062761: [\*]:[c]([\*])O
5. Unknown ECFP\_6 feature: -1537923023: [\*]C[C@H](O)[c](:[\*]):[\*]
6. Unknown ECFP\_6 feature: -652986225: [\*]NCC([\*])[\*]
7. Unknown ECFP\_6 feature: 2023785560: [\*]C([\*])O
8. Unknown ECFP\_6 feature: 493154328: [\*]CNC
9. Unknown ECFP\_6 feature: 864287155: [\*]NC
10. Unknown ECFP\_6 feature: 767488533: [\*]:[c]([\*])CC

## Feature Contribution

### Top features for positive contribution

| Fingerprint | Bit/Smiles | Feature Structure | Score |
|-------------|------------|-------------------|-------|
|             |            |                   |       |

| ECFP_6                                 | 1559650422 | <p>AND Enantiomer</p> 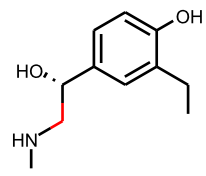 <p>[*]C[*]</p>                                        | 0.129   |
|----------------------------------------|------------|-----------------------------------------------------------------------------------------------------------------------------------------------------------------|---------|
| FCFP_6                                 | 3          | <p>AND Enantiomer</p>  <p>[*]O</p>                                           | 0.0924  |
| FCFP_6                                 | -885550502 | <p>AND Enantiomer</p>  <p>[*]C([*])NC</p>                                    | 0.0684  |
| Top Features for negative contribution |            |                                                                                                                                                                 |         |
| Fingerprint                            | Bit/Smiles | Feature Structure                                                                                                                                               | Score   |
| FCFP_6                                 | -453677277 | <p>AND Enantiomer</p>  <p>[*]C([*])[c]1:[cH]:[*]<br/>:[cH]:[cH]:[cH]:1</p> | -0.0906 |
| FCFP_6                                 | 136597326  | <p>AND Enantiomer</p>  <p>[*]C([*])C</p>                                   | -0.0815 |

FCFP\_6

203677720

AND Enantiomer

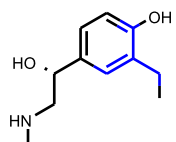

[\*]C([\*])[c](:[cH]:[\*]  
):[cH]:[\*]

-0.0713

AND Enantiomer

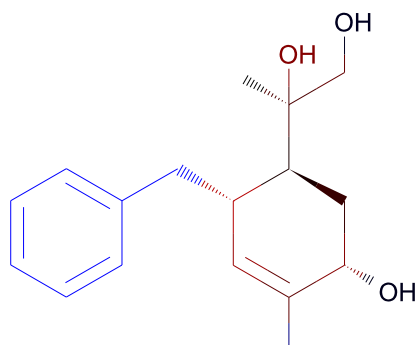 $C_{17}H_{24}O_3$ 

Molecular Weight: 276.371

ALogP: 2.165

Rotatable Bonds: 4

Acceptors: 3

Donors: 3

## Model Prediction

Prediction: 0.0495

Unit: g/kg\_body\_weight

Mahalanobis Distance: 30.6

Mahalanobis Distance p-value: 1.04e-025

Mahalanobis Distance: The Mahalanobis distance (MD) is a generalization of the Euclidean distance that accounts for correlations among the X properties. It is calculated as the distance to the center of the training data. The larger the MD, the less trustworthy the prediction.

Mahalanobis Distance p-value: The p-value gives the fraction of training data with an MD greater than or equal to the one for the given sample, assuming normally distributed data. The smaller the p-value, the less trustworthy the prediction. For highly non-normal X properties (e.g., fingerprints), the MD p-value is wildly inaccurate.

## Structural Similar Compounds

| Name                        | ALBUTEROL.SULFATE | PINDOLOL  | PROPYL GALLATE   |
|-----------------------------|-------------------|-----------|------------------|
| Structure                   |                   |           |                  |
| Actual Endpoint (-log C)    | 4.37897           | 3.4038    | 2.84963          |
| Predicted Endpoint (-log C) | 3.92079           | 4.03315   | 2.91297          |
| Distance                    | 0.575             | 0.617     | 0.620            |
| Reference                   | NDA-19269         | NDA-18285 | NTP REPORT # 240 |

## Model Applicability

Unknown features are fingerprint features in the query molecule, but not found or appearing too infrequently in the training set.

1. All properties and OPS components are within expected ranges.
2. Unknown ECFP\_6 feature: -2097867909: [\*]C[C@H](O)C(=O)[\*]
3. Unknown ECFP\_6 feature: -801490360: [\*]C([\*])CC([\*])[\*]
4. Unknown ECFP\_6 feature: -327548242: [\*]C[C@H](C([\*])[\*])C([\*])([\*])[\*]
5. Unknown ECFP\_6 feature: -1263967621: [\*]C[C@H](C(=O)C([\*])[\*])[\*]
6. Unknown ECFP\_6 feature: 470495651: [\*]C([\*])C=C([\*])[\*]
7. Unknown ECFP\_6 feature: -1042330089: [\*]C=C\C/C([\*])[\*]
8. Unknown ECFP\_6 feature: 1280892564: [\*]C[C@H](C(O)C([\*])[\*])[\*]
9. Unknown ECFP\_6 feature: -1907755304: [\*]C([\*])([\*])CO
10. Unknown ECFP\_6 feature: 865857320: [\*]C([\*])([\*])C
11. Unknown ECFP\_6 feature: 2025123907: [\*]C([\*])([\*])O
12. Unknown ECFP\_6 feature: 2024749573: [\*]C([\*])O
13. Unknown ECFP\_6 feature: 771121623: [\*]C([\*])C(c):[\*]:[\*]
14. Unknown ECFP\_6 feature: 1997021792: [\*]:[cH]:[cH]:[cH]:[\*]
15. Unknown ECFP\_6 feature: 2022454958: [\*]CO

## Feature Contribution

### Top features for positive contribution

| Fingerprint | Bit/Smiles | Feature Structure | Score |
|-------------|------------|-------------------|-------|
|-------------|------------|-------------------|-------|

|                                        |            |                                                                                                                                                           |        |
|----------------------------------------|------------|-----------------------------------------------------------------------------------------------------------------------------------------------------------|--------|
| FCFP_6                                 | 451847724  | <p>AND Enantiomer</p> 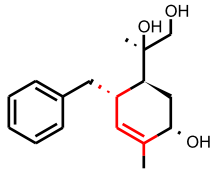 <p>[*]C(=CC(=[*]))[*]</p>                       | 0.16   |
| ECFP_6                                 | -167460056 | <p>AND Enantiomer</p>  <p>[*]C([*])[*]</p>                             | 0.136  |
| ECFP_6                                 | 1559650422 | <p>AND Enantiomer</p>  <p>[*]C[*]</p>                                  | 0.129  |
| Top Features for negative contribution |            |                                                                                                                                                           |        |
| Fingerprint                            | Bit/Smiles | Feature Structure                                                                                                                                         | Score  |
| FCFP_6                                 | 991735244  | <p>AND Enantiomer</p>  <p>[*][c]1:[*]:[cH]:[cH]<br/>:[cH]:[cH]:1</p> | -0.134 |
| ECFP_6                                 | 1564392544 | <p>AND Enantiomer</p>  <p>[*][c]1:[*]:[cH]:[cH]<br/>:[cH]:[cH]:1</p> | -0.133 |

|        |             |                                                                                                                                                                        |         |
|--------|-------------|------------------------------------------------------------------------------------------------------------------------------------------------------------------------|---------|
| FCFP_6 | -1698724694 | <p>AND Enantiomer</p> 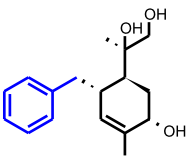 <p><chem>[*]C([*])[c]1:[cH]:[cH]:[cH]:[cH]:[cH]:1</chem></p> | -0.0944 |
|--------|-------------|------------------------------------------------------------------------------------------------------------------------------------------------------------------------|---------|

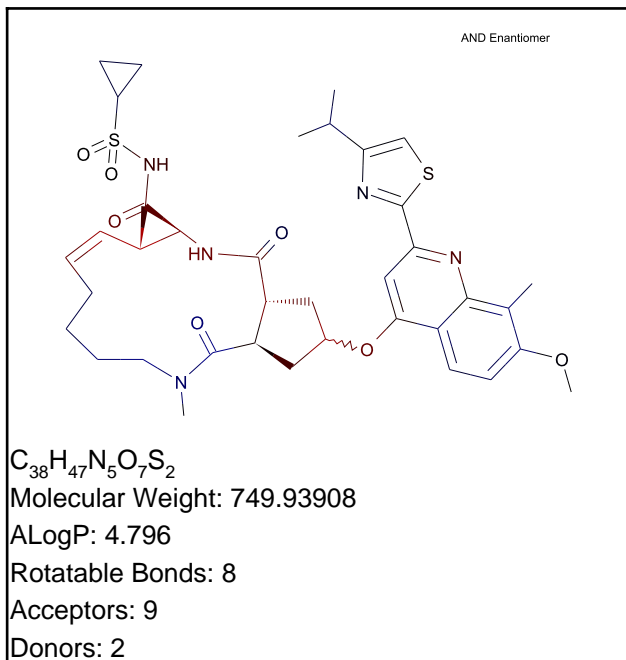

### Model Prediction

Prediction: 0.00211

Unit: g/kg\_body\_weight

Mahalanobis Distance: 55.7

Mahalanobis Distance p-value: 1.58e-065

Mahalanobis Distance: The Mahalanobis distance (MD) is a generalization of the Euclidean distance that accounts for correlations among the X properties. It is calculated as the distance to the center of the training data. The larger the MD, the less trustworthy the prediction.

Mahalanobis Distance p-value: The p-value gives the fraction of training data with an MD greater than or equal to the one for the given sample, assuming normally distributed data. The smaller the p-value, the less trustworthy the prediction. For highly non-normal X properties (e.g., fingerprints), the MD p-value is wildly inaccurate.

### Structural Similar Compounds

| Name                        | RESERPINE                                                                           | DIARYLANILIDE YELLOW                                                                | C.I.PIGMENT RED 23                                                                  |
|-----------------------------|-------------------------------------------------------------------------------------|-------------------------------------------------------------------------------------|-------------------------------------------------------------------------------------|
| Structure                   | 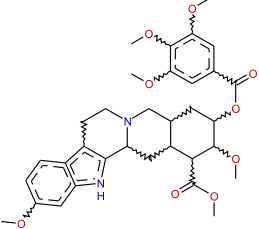 |  |  |
| Actual Endpoint (-log C)    | 6.38645                                                                             | 2.70208                                                                             | 2.28997                                                                             |
| Predicted Endpoint (-log C) | 5.548                                                                               | 3.76154                                                                             | 3.52921                                                                             |
| Distance                    | 0.885                                                                               | 0.887                                                                               | 0.922                                                                               |
| Reference                   | NTP 193 22                                                                          | NTP 30 C-4                                                                          | NTP 411 146                                                                         |

### Model Applicability

Unknown features are fingerprint features in the query molecule, but not found or appearing too infrequently in the training set.

- OPS PC1 out of range. Value: 18.64. Training min, max, SD, explained variance: -9.2986, 15.594, 5, 0.1094.
- Unknown FCFP\_2 feature: 1018942292: [\*]NS(=O)(=O)C1[\*][\*]1
- Unknown ECFP\_6 feature: -154530762: [\*]N[\*]
- Unknown ECFP\_6 feature: 914325265: [\*]:s:[\*]
- Unknown ECFP\_6 feature: -797085356: [\*]S(=O)(=O)[\*]
- Unknown ECFP\_6 feature: -2095963820: [\*][C@@H]1[\*][\*]C[C@H]1C(=O)[\*]
- Unknown ECFP\_6 feature: -867777309: [\*]NC(=O)C([\*])[\*]
- Unknown ECFP\_6 feature: -1338907019: [\*]C(=O)NC1([\*])[\*][\*]1
- Unknown ECFP\_6 feature: -309676563: [\*]N[C@]1(C[C@H]1[\*])C(=O)[\*]
- Unknown ECFP\_6 feature: 413587124: [\*][C@@H]1CC1([\*])[\*]
- Unknown ECFP\_6 feature: -1049290660: [\*]C1([\*])C[C@H]1C(=O)[\*]
- Unknown ECFP\_6 feature: 890368401: [\*]C=C/C1[\*][\*]1
- Unknown ECFP\_6 feature: 360408239: [\*]C\C=C/[\*]
- Unknown ECFP\_6 feature: -1331088410: [\*]CCC=[\*]
- Unknown ECFP\_6 feature: -1332781180: [\*]1[\*]CCCC1
- Unknown ECFP\_6 feature: -757679000: [\*]N1[\*][\*]CC1
- Unknown ECFP\_6 feature: 1616402542: [\*]CN(C)C(=O)[\*]
- Unknown ECFP\_6 feature: 1526862590: [\*]C([\*])C(=O)N([\*])[\*]
- Unknown ECFP\_6 feature: -801490360: [\*]C([\*])CC([\*])[\*]



20. Unknown ECFP\_6 feature: 1480368712: [\*]OC1C[\*][\*]C1
21. Unknown ECFP\_6 feature: -1818486371: [\*]NC(=O)C1([\*])([\*])[\*]1
22. Unknown ECFP\_6 feature: 946167604: [\*]C(=[\*])NS(=[\*])(=[\*])[\*]
23. Unknown ECFP\_6 feature: 866343404: [\*]N([\*])C
24. Unknown ECFP\_6 feature: 1310940530: [\*]C([\*])O[c](:[\*]):[\*]
25. Unknown ECFP\_6 feature: -428002189: [\*]:[cH]:[c](:n:[\*])[c](:[\*]):[\*]
26. Unknown ECFP\_6 feature: 1333660716: [\*][c](:[\*]):[c](:[cH]:[\*]):[c](:[\*]):[\*]
27. Unknown ECFP\_6 feature: 1576255326: [\*][c](:[\*]):[c](C):[c](:[\*]):[\*]
28. Unknown ECFP\_6 feature: 1048320787: [\*][c](:[\*]):[c](:n:[\*]):[c](:[\*]):[\*]
29. Unknown ECFP\_6 feature: -1426923364: [\*][c]1:[\*]:[\*]:[cH]:s:1
30. Unknown ECFP\_6 feature: -253227249: [\*]:[c](:[\*])[c]1:n:[\*]:[\*]:s:1
31. Unknown ECFP\_6 feature: 1411720546: [\*]C([\*])[c]1:[cH]:[\*]:[\*]:n:1
32. Unknown ECFP\_6 feature: -224638920: [\*][c]1:[\*]:[\*]:s:[cH]:1
33. Unknown ECFP\_6 feature: 733491677: [\*]:[c](:[\*])C(C)C
34. Unknown ECFP\_6 feature: 1307307440: [\*]:[c](:[\*])OC
35. Unknown ECFP\_6 feature: 2121941848: [\*]NS(=O)(=O)C1[\*][\*]1
36. Unknown ECFP\_6 feature: 2102150379: [\*]S(=[\*])(=O)[\*]
37. Unknown ECFP\_6 feature: -622223421: [\*]S(=[\*])(=[\*])C1CC1

## Feature Contribution

### Top features for positive contribution

| Fingerprint | Bit/Smiles | Feature Structure                                                                                                                    | Score |
|-------------|------------|--------------------------------------------------------------------------------------------------------------------------------------|-------|
| FCFP_6      | 451847724  | <p>AND Enantiomer</p> 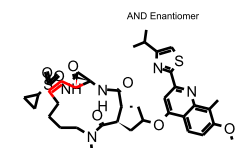 <p>[*]C(=CC(=[*]))[*]</p> | 0.16  |
| ECFP_6      | -167460056 | <p>AND Enantiomer</p>  <p>[*]C([*])[*]</p>      | 0.136 |

|                                        |            |                                                                                                                               |         |
|----------------------------------------|------------|-------------------------------------------------------------------------------------------------------------------------------|---------|
| FCFP_6                                 | 3          | <p>AND Enantiomer</p> 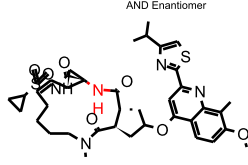 <p>[*]O</p>         | 0.0924  |
| Top Features for negative contribution |            |                                                                                                                               |         |
| Fingerprint                            | Bit/Smiles | Feature Structure                                                                                                             | Score   |
| ECFP_6                                 | 2106656448 | <p>AND Enantiomer</p>  <p>[*]C(=O)[*]</p>  | -0.11   |
| FCFP_6                                 | 1          | <p>AND Enantiomer</p>  <p>[*]=O</p>        | -0.102  |
| FCFP_6                                 | 136597326  | <p>AND Enantiomer</p>  <p>[*]C([*])C</p> | -0.0815 |

AND Enantiomer

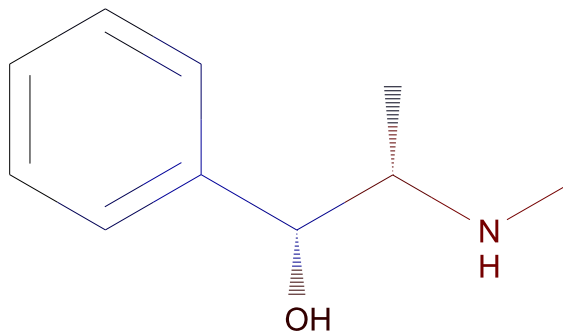C<sub>10</sub>H<sub>15</sub>NO

Molecular Weight: 165.232

ALogP: 1.234

Rotatable Bonds: 3

Acceptors: 2

Donors: 2

## Model Prediction

Prediction: 0.127

Unit: g/kg\_body\_weight

Mahalanobis Distance: 6.7

Mahalanobis Distance p-value: 0.308

Mahalanobis Distance: The Mahalanobis distance (MD) is a generalization of the Euclidean distance that accounts for correlations among the X properties. It is calculated as the distance to the center of the training data. The larger the MD, the less trustworthy the prediction.

Mahalanobis Distance p-value: The p-value gives the fraction of training data with an MD greater than or equal to the one for the given sample, assuming normally distributed data. The smaller the p-value, the less trustworthy the prediction. For highly non-normal X properties (e.g., fingerprints), the MD p-value is wildly inaccurate.

## Structural Similar Compounds

| Name                        | EPHEDRINE SULFATE | DL-AMPHETAMINE SULFATE | PRIMIDONE (PRIMACLONE) |
|-----------------------------|-------------------|------------------------|------------------------|
| Structure                   |                   |                        |                        |
| Actual Endpoint (-log C)    | 4.16695           | 4.43204                | 3.94103                |
| Predicted Endpoint (-log C) | 3.11455           | 3.18009                | 3.24349                |
| Distance                    | 0.000             | 0.355                  | 0.474                  |
| Reference                   | NCI/NTP TR-307    | NCI/NTP TR-387         | NCI/NTP TR-476         |

## Model Applicability

Unknown features are fingerprint features in the query molecule, but not found or appearing too infrequently in the training set.

1. All properties and OPS components are within expected ranges.

## Feature Contribution

### Top features for positive contribution

| Fingerprint | Bit/Smiles | Feature Structure                        | Score |
|-------------|------------|------------------------------------------|-------|
| FCFP_2      | -885550502 | <p>AND Enantiomer</p> <p>[*]C([*])NC</p> | 0.115 |

|                                        |                   |                                                                                                                                                       |              |
|----------------------------------------|-------------------|-------------------------------------------------------------------------------------------------------------------------------------------------------|--------------|
| FCFP_2                                 | 3                 | AND Enantiomer<br>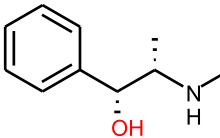<br><chem>[*]O</chem>                            | 0.0737       |
| Top Features for negative contribution |                   |                                                                                                                                                       |              |
| <b>Fingerprint</b>                     | <b>Bit/Smiles</b> | <b>Feature Structure</b>                                                                                                                              | <b>Score</b> |
| FCFP_2                                 | 203677720         | AND Enantiomer<br><br><chem>[*]C([*])[c](:[cH]:[*])[cH]:[*]</chem> | -0.0829      |
| FCFP_2                                 | 16                | AND Enantiomer<br><br><chem>[*][c](:[*]):[*]</chem>                | -0.0512      |
| FCFP_2                                 | 0                 | AND Enantiomer<br><br><chem>[*]C([*])[*]</chem>                  | -0.0314      |

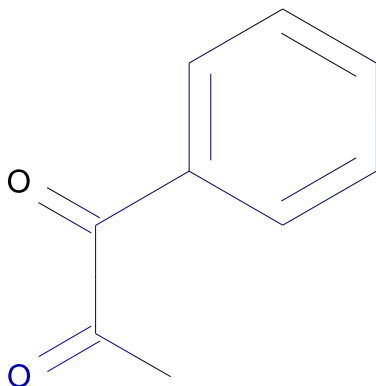C<sub>9</sub>H<sub>8</sub>O<sub>2</sub>

Molecular Weight: 148.159

ALogP: 1.446

Rotatable Bonds: 2

Acceptors: 2

Donors: 0

### Model Prediction

Prediction: 0.092

Unit: g/kg\_body\_weight

Mahalanobis Distance: 4.63

Mahalanobis Distance p-value: 0.988

Mahalanobis Distance: The Mahalanobis distance (MD) is a generalization of the Euclidean distance that accounts for correlations among the X properties. It is calculated as the distance to the center of the training data. The larger the MD, the less trustworthy the prediction.

Mahalanobis Distance p-value: The p-value gives the fraction of training data with an MD greater than or equal to the one for the given sample, assuming normally distributed data. The smaller the p-value, the less trustworthy the prediction. For highly non-normal X properties (e.g., fingerprints), the MD p-value is wildly inaccurate.

### Structural Similar Compounds

| Name                        | BENZYL ACETATE | 1-PHENYL-3-METHYL-5-PYRAZOLONE | PHTHALIC ANHYDRIDE |
|-----------------------------|----------------|--------------------------------|--------------------|
| Structure                   |                |                                |                    |
| Actual Endpoint (-log C)    | 2.46903        | 2.88887                        | 2.3413             |
| Predicted Endpoint (-log C) | 3.22857        | 3.45184                        | 3.37248            |
| Distance                    | 0.296          | 0.348                          | 0.371              |
| Reference                   | NCI/NTP TR-431 | NCI/NTP TR-141                 | NCI/NTP TR-159     |

### Model Applicability

Unknown features are fingerprint features in the query molecule, but not found or appearing too infrequently in the training set.

1. All properties and OPS components are within expected ranges.

### Feature Contribution

#### Top Features for negative contribution

| Fingerprint | Bit/Smiles | Feature Structure            | Score  |
|-------------|------------|------------------------------|--------|
| FCFP_2      | 1872154524 | <br><chem>[*]C(=O)[*]</chem> | -0.105 |

|        |           |                                                                                                                                      |         |
|--------|-----------|--------------------------------------------------------------------------------------------------------------------------------------|---------|
| FCFP_2 | 203677720 | 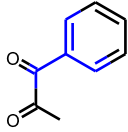<br><chem>[*]C([*])(c)(:[cH]:[*]):[cH]:[*]</chem> | -0.0829 |
| FCFP_2 | 1         | <br><chem>[*]=O</chem>                            | -0.0796 |

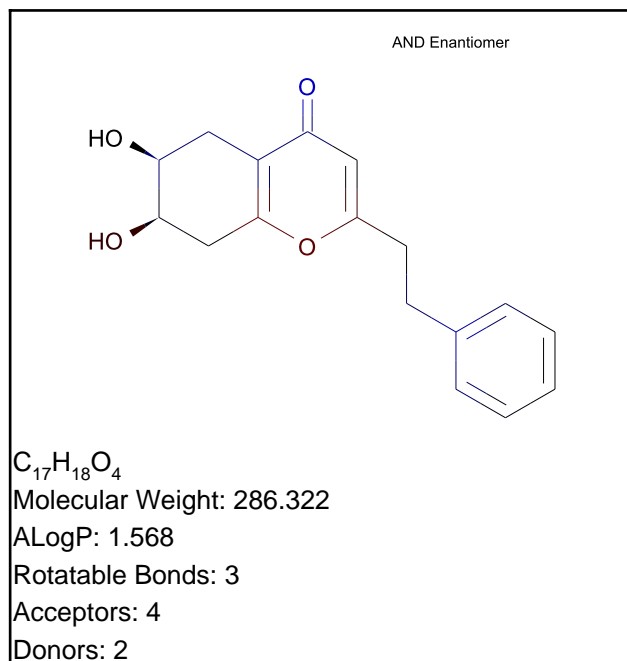

### Model Prediction

Prediction: 0.124

Unit: g/kg\_body\_weight

Mahalanobis Distance: 6.78

Mahalanobis Distance p-value: 0.275

Mahalanobis Distance: The Mahalanobis distance (MD) is a generalization of the Euclidean distance that accounts for correlations among the X properties. It is calculated as the distance to the center of the training data. The larger the MD, the less trustworthy the prediction.

Mahalanobis Distance p-value: The p-value gives the fraction of training data with an MD greater than or equal to the one for the given sample, assuming normally distributed data. The smaller the p-value, the less trustworthy the prediction. For highly non-normal X properties (e.g., fingerprints), the MD p-value is wildly inaccurate.

### Structural Similar Compounds

| Name                        | TOLAZAMIDE                                                                          | CHLORPROPAMIDE                                                                      | TOLBUTAMIDE                                                                         |
|-----------------------------|-------------------------------------------------------------------------------------|-------------------------------------------------------------------------------------|-------------------------------------------------------------------------------------|
| Structure                   | 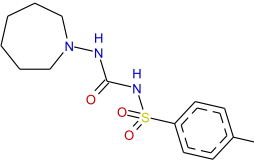 |  |  |
| Actual Endpoint (-log C)    | 2.84011                                                                             | 3.0107                                                                              | 2.3985                                                                              |
| Predicted Endpoint (-log C) | 3.59315                                                                             | 3.18321                                                                             | 3.32272                                                                             |
| Distance                    | 0.441                                                                               | 0.474                                                                               | 0.498                                                                               |
| Reference                   | NCI/NTP TR-051                                                                      | NCI/NTP TR-045                                                                      | NCI/NTP TR-031                                                                      |

### Model Applicability

Unknown features are fingerprint features in the query molecule, but not found or appearing too infrequently in the training set.

1. All properties and OPS components are within expected ranges.

### Feature Contribution

#### Top features for positive contribution

| Fingerprint | Bit/Smiles  | Feature Structure                                                                                                                                                    | Score |
|-------------|-------------|----------------------------------------------------------------------------------------------------------------------------------------------------------------------|-------|
| FCFP_2      | -1143715940 | <p style="text-align: center;">AND Enantiomer</p> 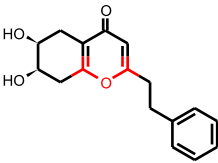 <p>[*]C(=[*])OC(=[*])[*]</p> | 0.095 |

|                                        |             |                                                                                                                                                          |         |
|----------------------------------------|-------------|----------------------------------------------------------------------------------------------------------------------------------------------------------|---------|
| FCFP_2                                 | 3           | <p>AND Enantiomer</p> 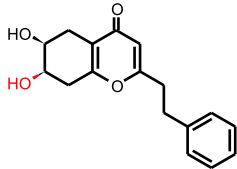 <p>[*]O</p>                                    | 0.0737  |
| Top Features for negative contribution |             |                                                                                                                                                          |         |
| Fingerprint                            | Bit/Smiles  | Feature Structure                                                                                                                                        | Score   |
| FCFP_2                                 | -1272798659 | <p>AND Enantiomer</p>  <p>[*]C([*])CC(=[*])[*]</p>                    | -0.111  |
| FCFP_2                                 | 1872154524  | <p>AND Enantiomer</p>  <p>[*]C(=O)[*]</p>                             | -0.105  |
| FCFP_2                                 | 203677720   | <p>AND Enantiomer</p>  <p>[*]C([*])[c](:[cH]:[*]<br/>):[cH]:[*]</p> | -0.0829 |



AND Enantiomer

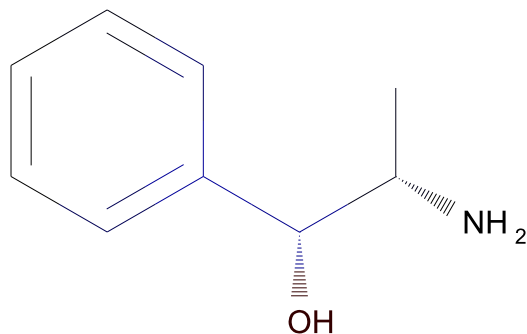 $C_9H_{13}NO$ 

Molecular Weight: 151.206

ALogP: 0.802

Rotatable Bonds: 2

Acceptors: 2

Donors: 2

## Model Prediction

Prediction: 0.131

Unit: g/kg\_body\_weight

Mahalanobis Distance: 4.61

Mahalanobis Distance p-value: 0.989

Mahalanobis Distance: The Mahalanobis distance (MD) is a generalization of the Euclidean distance that accounts for correlations among the X properties. It is calculated as the distance to the center of the training data. The larger the MD, the less trustworthy the prediction.

Mahalanobis Distance p-value: The p-value gives the fraction of training data with an MD greater than or equal to the one for the given sample, assuming normally distributed data. The smaller the p-value, the less trustworthy the prediction. For highly non-normal X properties (e.g., fingerprints), the MD p-value is wildly inaccurate.

## Structural Similar Compounds

| Name                        | EPHEDRINE SULFATE | DL-AMPHETAMINE SULFATE | ACETAMINOPHEN (4-HYDROXYACETANILIDE) |
|-----------------------------|-------------------|------------------------|--------------------------------------|
| Structure                   |                   |                        |                                      |
| Actual Endpoint (-log C)    | 4.16695           | 4.43204                | 2.74809                              |
| Predicted Endpoint (-log C) | 3.11455           | 3.18009                | 2.67552                              |
| Distance                    | 0.229             | 0.326                  | 0.417                                |
| Reference                   | NCI/NTP TR-307    | NCI/NTP TR-387         | NCI/NTP TR-394                       |

## Model Applicability

Unknown features are fingerprint features in the query molecule, but not found or appearing too infrequently in the training set.

1. All properties and OPS components are within expected ranges.

## Feature Contribution

### Top features for positive contribution

| Fingerprint | Bit/Smiles | Feature Structure                 | Score  |
|-------------|------------|-----------------------------------|--------|
| FCFP_2      | 3          | <p>AND Enantiomer</p> <p>[*]O</p> | 0.0737 |

### Top Features for negative contribution

| Fingerprint | Bit/Smiles | Feature Structure | Score |
|-------------|------------|-------------------|-------|
|             |            |                   |       |

|        |           |                                                                                                                                                               |         |
|--------|-----------|---------------------------------------------------------------------------------------------------------------------------------------------------------------|---------|
| FCFP_2 | 203677720 | <p>AND Enantiomer</p> 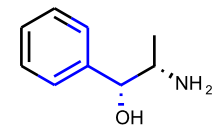 <p><chem>[*]C([*])[c](:[cH]:[*])[cH]:[*]</chem></p> | -0.0829 |
| FCFP_2 | 16        | <p>AND Enantiomer</p>  <p><chem>[*][c](:[*]):[*]</chem></p>                | -0.0512 |
| FCFP_2 | 0         | <p>AND Enantiomer</p>  <p><chem>[*]C([*])[*]</chem></p>                    | -0.0314 |

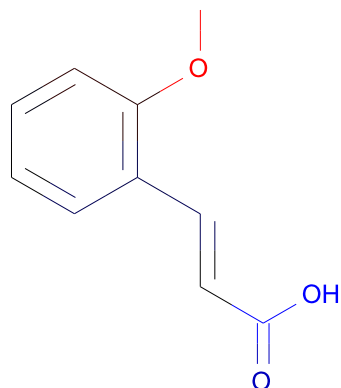

$C_{10}H_{10}O_3$

Molecular Weight: 178.185

ALogP: 1.911

Rotatable Bonds: 3

Acceptors: 3

Donors: 1

## Model Prediction

Prediction: 0.186

Unit: g/kg\_body\_weight

Mahalanobis Distance: 6.15

Mahalanobis Distance p-value: 0.566

Mahalanobis Distance: The Mahalanobis distance (MD) is a generalization of the Euclidean distance that accounts for correlations among the X properties. It is calculated as the distance to the center of the training data. The larger the MD, the less trustworthy the prediction.

Mahalanobis Distance p-value: The p-value gives the fraction of training data with an MD greater than or equal to the one for the given sample, assuming normally distributed data. The smaller the p-value, the less trustworthy the prediction. For highly non-normal X properties (e.g., fingerprints), the MD p-value is wildly inaccurate.

## Structural Similar Compounds

| Name                        | EUGENOL        | O-NITROANISOLE | MEXACARBATE    |
|-----------------------------|----------------|----------------|----------------|
| Structure                   |                |                |                |
| Actual Endpoint (-log C)    | 2.78402        | 3.18813        | 4.07253        |
| Predicted Endpoint (-log C) | 2.98617        | 3.55234        | 3.7152         |
| Distance                    | 0.369          | 0.369          | 0.401          |
| Reference                   | NCI/NTP TR-223 | NCI/NTP TR-416 | NCI/NTP TR-147 |

## Model Applicability

Unknown features are fingerprint features in the query molecule, but not found or appearing too infrequently in the training set.

1. All properties and OPS components are within expected ranges.

## Feature Contribution

### Top features for positive contribution

| Fingerprint | Bit/Smiles | Feature Structure | Score |
|-------------|------------|-------------------|-------|
| FCFP_2      | 136627117  | <p>[*]OC</p>      | 0.173 |

|                                        |            |                                                                                                                                     |        |
|----------------------------------------|------------|-------------------------------------------------------------------------------------------------------------------------------------|--------|
| FCFP_2                                 | 1036089772 | 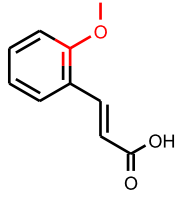<br><chem>[*]:[c](:[*])OC</chem>                 | 0.0749 |
| FCFP_2                                 | 332760439  | <br><chem>[*]O[c](:[cH]:[*]):[c]([*]):[*]</chem> | 0.0611 |
| Top Features for negative contribution |            |                                                                                                                                     |        |
| Fingerprint                            | Bit/Smiles | Feature Structure                                                                                                                   | Score  |
| FCFP_2                                 | 7          | <br><chem>[*]O</chem>                            | -0.214 |
| FCFP_2                                 | -548632217 | <br><chem>[*]C(=[*])O</chem>                    | -0.119 |
| FCFP_2                                 | 1872154524 | <br><chem>[*]C(=O)[*]</chem>                   | -0.105 |



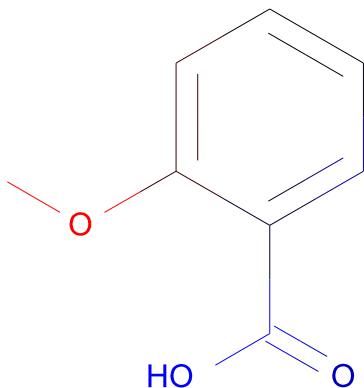C<sub>8</sub>H<sub>8</sub>O<sub>3</sub>

Molecular Weight: 152.147

ALogP: 1.443

Rotatable Bonds: 2

Acceptors: 3

Donors: 1

### Model Prediction

Prediction: 0.178

Unit: g/kg\_body\_weight

Mahalanobis Distance: 6.16

Mahalanobis Distance p-value: 0.565

Mahalanobis Distance: The Mahalanobis distance (MD) is a generalization of the Euclidean distance that accounts for correlations among the X properties. It is calculated as the distance to the center of the training data. The larger the MD, the less trustworthy the prediction.

Mahalanobis Distance p-value: The p-value gives the fraction of training data with an MD greater than or equal to the one for the given sample, assuming normally distributed data. The smaller the p-value, the less trustworthy the prediction. For highly non-normal X properties (e.g., fingerprints), the MD p-value is wildly inaccurate.

### Structural Similar Compounds

| Name                        | O-NITROANISOLE | P-CRESIDINE    | P-NITROBENZOIC ACID |
|-----------------------------|----------------|----------------|---------------------|
| Structure                   |                |                |                     |
| Actual Endpoint (-log C)    | 3.18813        | 2.48408        | 2.90081             |
| Predicted Endpoint (-log C) | 3.55234        | 3.53389        | 2.77599             |
| Distance                    | 0.309          | 0.366          | 0.410               |
| Reference                   | NCI/NTP TR-416 | NCI/NTP TR-142 | NCI/NTP TR-442      |

### Model Applicability

Unknown features are fingerprint features in the query molecule, but not found or appearing too infrequently in the training set.

1. All properties and OPS components are within expected ranges.

### Feature Contribution

#### Top features for positive contribution

| Fingerprint | Bit/Smiles | Feature Structure | Score |
|-------------|------------|-------------------|-------|
| FCFP_2      | 136627117  | <br>[*]OC         | 0.173 |

| FCFP_2                                 | 1036089772 | 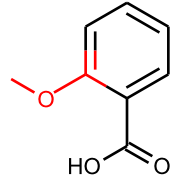<br><chem>[*]:[c](:[*])OC</chem>                 | 0.0749 |
|----------------------------------------|------------|-------------------------------------------------------------------------------------------------------------------------------------|--------|
| FCFP_2                                 | 332760439  | <br><chem>[*]O[c](:[cH]:[*]):[c]([*]):[*]</chem> | 0.0611 |
| Top Features for negative contribution |            |                                                                                                                                     |        |
| Fingerprint                            | Bit/Smiles | Feature Structure                                                                                                                   | Score  |
| FCFP_2                                 | 7          | <br><chem>[*]O</chem>                            | -0.214 |
| FCFP_2                                 | -548632217 | <br><chem>[*]C(=[*])O</chem>                    | -0.119 |
| FCFP_2                                 | 1872154524 | <br><chem>[*]C(=O)[*]</chem>                   | -0.105 |





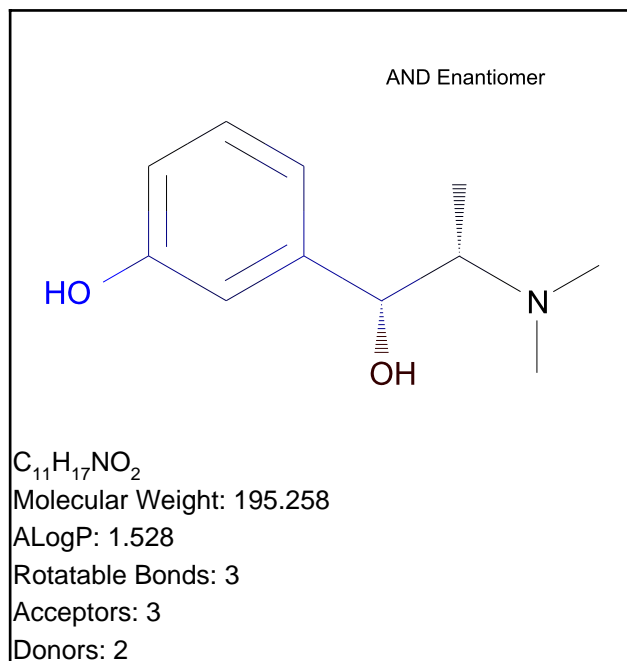

### Model Prediction

Prediction: 0.356

Unit: g/kg\_body\_weight

Mahalanobis Distance: 6.25

Mahalanobis Distance p-value: 0.518

Mahalanobis Distance: The Mahalanobis distance (MD) is a generalization of the Euclidean distance that accounts for correlations among the X properties. It is calculated as the distance to the center of the training data. The larger the MD, the less trustworthy the prediction.

Mahalanobis Distance p-value: The p-value gives the fraction of training data with an MD greater than or equal to the one for the given sample, assuming normally distributed data. The smaller the p-value, the less trustworthy the prediction. For highly non-normal X properties (e.g., fingerprints), the MD p-value is wildly inaccurate.

### Structural Similar Compounds

| Name                        | EPHEDRINE SULFATE                                                                   | t-BUTYLHYDROQUINONE                                                                 | ACETAMINOPHEN (4-HYDROXYACETANILIDE)                                                |
|-----------------------------|-------------------------------------------------------------------------------------|-------------------------------------------------------------------------------------|-------------------------------------------------------------------------------------|
| Structure                   | 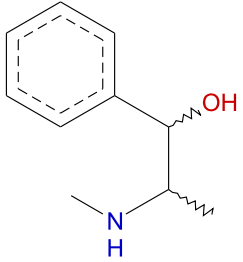 |  |  |
| Actual Endpoint (-log C)    | 4.16695                                                                             | 2.44253                                                                             | 2.74809                                                                             |
| Predicted Endpoint (-log C) | 3.11455                                                                             | 2.62758                                                                             | 2.67552                                                                             |
| Distance                    | 0.396                                                                               | 0.433                                                                               | 0.476                                                                               |
| Reference                   | NCI/NTP TR-307                                                                      | NCI/NTP TR-459                                                                      | NCI/NTP TR-394                                                                      |

### Model Applicability

Unknown features are fingerprint features in the query molecule, but not found or appearing too infrequently in the training set.

1. All properties and OPS components are within expected ranges.

### Feature Contribution

#### Top features for positive contribution

| Fingerprint | Bit/Smiles | Feature Structure                                                                                                                                                               | Score  |
|-------------|------------|---------------------------------------------------------------------------------------------------------------------------------------------------------------------------------|--------|
| FCFP_2      | 3          | <p style="text-align: center;">AND Enantiomer</p> 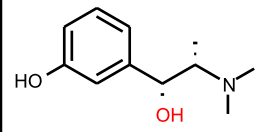 <p style="text-align: center;">[*]O</p> | 0.0737 |

#### Top Features for negative contribution

| Fingerprint | Bit/Smiles | Feature Structure | Score |
|-------------|------------|-------------------|-------|
|             |            |                   |       |

|        |            |                                                                                                                                                        |         |
|--------|------------|--------------------------------------------------------------------------------------------------------------------------------------------------------|---------|
| FCFP_2 | 7          | <p>AND Enantiomer</p> 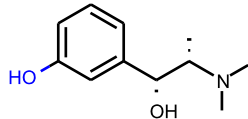 <p>[*]O</p>                                  | -0.214  |
| FCFP_2 | -549108873 | <p>AND Enantiomer</p>  <p>[*]:[c](:[*])O</p>                        | -0.127  |
| FCFP_2 | 203677720  | <p>AND Enantiomer</p>  <p>[*]C([*])[c](:[cH]:[*]<br/>):[cH]:[*]</p> | -0.0829 |

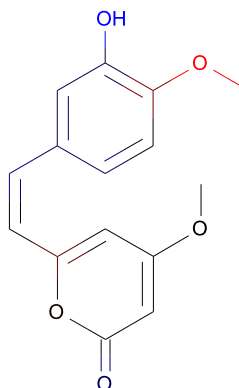

$C_{15}H_{14}O_5$

Molecular Weight: 274.269

ALogP: 1.969

Rotatable Bonds: 4

Acceptors: 5

Donors: 1

## Model Prediction

Prediction: 0.109

Unit: g/kg\_body\_weight

Mahalanobis Distance: 8.17

Mahalanobis Distance p-value: 0.0158

Mahalanobis Distance: The Mahalanobis distance (MD) is a generalization of the Euclidean distance that accounts for correlations among the X properties. It is calculated as the distance to the center of the training data. The larger the MD, the less trustworthy the prediction.

Mahalanobis Distance p-value: The p-value gives the fraction of training data with an MD greater than or equal to the one for the given sample, assuming normally distributed data. The smaller the p-value, the less trustworthy the prediction. For highly non-normal X properties (e.g., fingerprints), the MD p-value is wildly inaccurate.

## Structural Similar Compounds

| Name                        | FENTHION       | DIMETHYL TEREPHTHALATE | 3-NITRO-P-ACETOPHENETIDE |
|-----------------------------|----------------|------------------------|--------------------------|
| Structure                   |                |                        |                          |
| Actual Endpoint (-log C)    | 5.4903         | 2.93604                | 3.11767                  |
| Predicted Endpoint (-log C) | 4.18234        | 3.50861                | 3.42808                  |
| Distance                    | 0.486          | 0.505                  | 0.527                    |
| Reference                   | NCI/NTP TR-103 | NCI/NTP TR-121         | NCI/NTP TR-133           |

## Model Applicability

Unknown features are fingerprint features in the query molecule, but not found or appearing too infrequently in the training set.

1. All properties and OPS components are within expected ranges.

## Feature Contribution

### Top features for positive contribution

| Fingerprint | Bit/Smiles | Feature Structure | Score |
|-------------|------------|-------------------|-------|
| FCFP_2      | 136627117  | <p>[*]OC</p>      | 0.173 |

|                                        |             |                                                                                                                           |        |
|----------------------------------------|-------------|---------------------------------------------------------------------------------------------------------------------------|--------|
| FCFP_2                                 | -1143715940 | 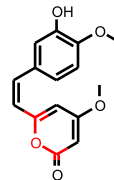<br><chem>[*]C(=[*])OC(=[*])[*]</chem> | 0.095  |
| FCFP_2                                 | 1036089772  | <br><chem>[*]:[c](:[*])OC</chem>       | 0.0749 |
| Top Features for negative contribution |             |                                                                                                                           |        |
| Fingerprint                            | Bit/Smiles  | Feature Structure                                                                                                         | Score  |
| FCFP_2                                 | 7           | <br><chem>[*]O</chem>                  | -0.214 |
| FCFP_2                                 | -549108873  | <br><chem>[*]:[c](:[*])O</chem>      | -0.127 |
| FCFP_2                                 | 1872154524  | <br><chem>[*]C(=O)[*]</chem>         | -0.105 |



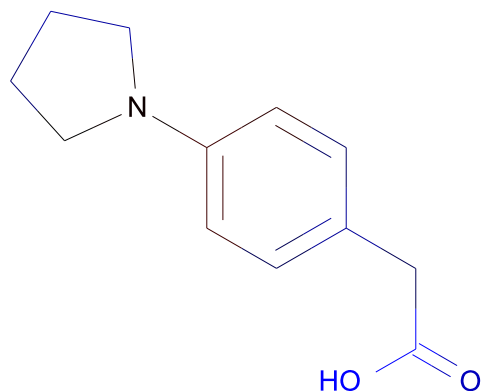

$C_{12}H_{15}NO_2$

Molecular Weight: 205.253

ALogP: 2.117

Rotatable Bonds: 3

Acceptors: 3

Donors: 1

## Model Prediction

Prediction: 0.432

Unit: g/kg\_body\_weight

Mahalanobis Distance: 8.71

Mahalanobis Distance p-value: 0.00349

Mahalanobis Distance: The Mahalanobis distance (MD) is a generalization of the Euclidean distance that accounts for correlations among the X properties. It is calculated as the distance to the center of the training data. The larger the MD, the less trustworthy the prediction.

Mahalanobis Distance p-value: The p-value gives the fraction of training data with an MD greater than or equal to the one for the given sample, assuming normally distributed data. The smaller the p-value, the less trustworthy the prediction. For highly non-normal X properties (e.g., fingerprints), the MD p-value is wildly inaccurate.

## Structural Similar Compounds

| Name                        | MEXACARBATE    | METHYLPHENIDATE HYDROCHLORIDE | EUGENOL        |
|-----------------------------|----------------|-------------------------------|----------------|
| Structure                   |                |                               |                |
| Actual Endpoint (-log C)    | 4.07253        | 3.66897                       | 2.78402        |
| Predicted Endpoint (-log C) | 3.7152         | 3.4956                        | 2.98617        |
| Distance                    | 0.383          | 0.419                         | 0.431          |
| Reference                   | NCI/NTP TR-147 | NCI/NTP TR-439                | NCI/NTP TR-223 |

## Model Applicability

Unknown features are fingerprint features in the query molecule, but not found or appearing too infrequently in the training set.

1. All properties and OPS components are within expected ranges.

## Feature Contribution

### Top features for positive contribution

| Fingerprint | Bit/Smiles | Feature Structure                   | Score  |
|-------------|------------|-------------------------------------|--------|
| FCFP_2      | 332760439  | <br>[*]O[c](:[cH]:[*]):[c]([*]):[*] | 0.0611 |

### Top Features for negative contribution

| Fingerprint | Bit/Smiles | Feature Structure | Score |
|-------------|------------|-------------------|-------|
|             |            |                   |       |

|        |             |                                                                                                                 |        |
|--------|-------------|-----------------------------------------------------------------------------------------------------------------|--------|
| FCFP_2 | 7           | 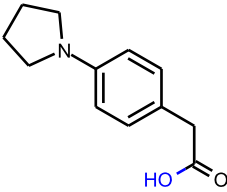 <p>[*]O</p>                 | -0.214 |
| FCFP_2 | -548632217  |  <p>[*]C(=[*])O</p>          | -0.119 |
| FCFP_2 | -1272798659 |  <p>[*]C([*])CC(=[*])[*]</p> | -0.111 |

AND Enantiomer

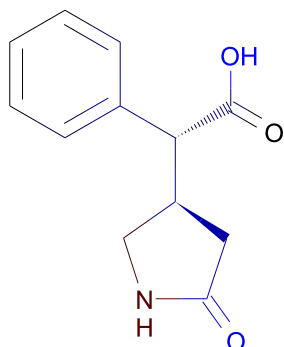 $C_{12}H_{13}NO_3$ 

Molecular Weight: 219.237

ALogP: 0.621

Rotatable Bonds: 3

Acceptors: 3

Donors: 2

## Model Prediction

Prediction: 0.356

Unit: g/kg\_body\_weight

Mahalanobis Distance: 9.81

Mahalanobis Distance p-value: 8.82e-005

Mahalanobis Distance: The Mahalanobis distance (MD) is a generalization of the Euclidean distance that accounts for correlations among the X properties. It is calculated as the distance to the center of the training data. The larger the MD, the less trustworthy the prediction.

Mahalanobis Distance p-value: The p-value gives the fraction of training data with an MD greater than or equal to the one for the given sample, assuming normally distributed data. The smaller the p-value, the less trustworthy the prediction. For highly non-normal X properties (e.g., fingerprints), the MD p-value is wildly inaccurate.

## Structural Similar Compounds

| Name                        | PRIMIDONE<br>(PRIMACLONE) | 3-AMINO-4-ETHOXYACETANILIDE | O-ANTHRANILIC ACID |
|-----------------------------|---------------------------|-----------------------------|--------------------|
| Structure                   |                           |                             |                    |
| Actual Endpoint (-log C)    | 3.94103                   | 2.45902                     | 2.00682            |
| Predicted Endpoint (-log C) | 3.24349                   | 3.20661                     | 2.55301            |
| Distance                    | 0.358                     | 0.392                       | 0.442              |
| Reference                   | NCI/NTP TR-476            | NCI/NTP TR-112              | NCI/NTP TR-036     |

## Model Applicability

Unknown features are fingerprint features in the query molecule, but not found or appearing too infrequently in the training set.

1. All properties and OPS components are within expected ranges.

## Feature Contribution

### Top features for positive contribution

| Fingerprint | Bit/Smiles | Feature Structure                        | Score |
|-------------|------------|------------------------------------------|-------|
| FCFP_2      | -885550502 | <p>AND Enantiomer</p> <p>[*]C([*])NC</p> | 0.115 |



|                                        |             |                                                                                                                                         |        |
|----------------------------------------|-------------|-----------------------------------------------------------------------------------------------------------------------------------------|--------|
| FCFP_2                                 | 3           | <p>AND Enantiomer</p> 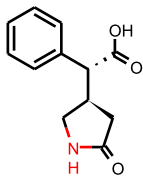 <p>[*]O</p>                   | 0.0737 |
| Top Features for negative contribution |             |                                                                                                                                         |        |
| Fingerprint                            | Bit/Smiles  | Feature Structure                                                                                                                       | Score  |
| FCFP_2                                 | 7           | <p>AND Enantiomer</p>  <p>[*]O</p>                   | -0.214 |
| FCFP_2                                 | -548632217  | <p>AND Enantiomer</p>  <p>[*]C(=[*])O</p>            | -0.119 |
| FCFP_2                                 | -1272798659 | <p>AND Enantiomer</p>  <p>[*]C([*])CC(=[*])[*]</p> | -0.111 |

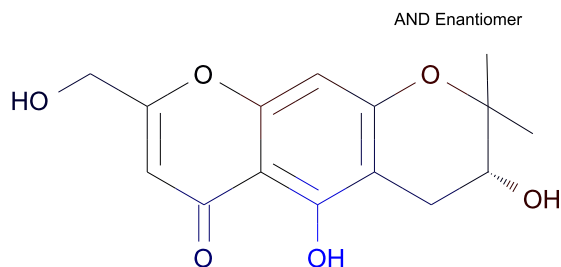

$C_{15}H_{16}O_6$

Molecular Weight: 292.284

ALogP: 0.901

Rotatable Bonds: 1

Acceptors: 6

Donors: 3

## Model Prediction

Prediction: 0.321

Unit: g/kg\_body\_weight

Mahalanobis Distance: 9.19

Mahalanobis Distance p-value: 0.000755

Mahalanobis Distance: The Mahalanobis distance (MD) is a generalization of the Euclidean distance that accounts for correlations among the X properties. It is calculated as the distance to the center of the training data. The larger the MD, the less trustworthy the prediction.

Mahalanobis Distance p-value: The p-value gives the fraction of training data with an MD greater than or equal to the one for the given sample, assuming normally distributed data. The smaller the p-value, the less trustworthy the prediction. For highly non-normal X properties (e.g., fingerprints), the MD p-value is wildly inaccurate.

## Structural Similar Compounds

| Name                        | PROPYL GALLATE | METHYLDOPA SESQUIHYDRATE | ACETOHEXAMIDE  |
|-----------------------------|----------------|--------------------------|----------------|
| Structure                   |                |                          |                |
| Actual Endpoint (-log C)    | 2.59435        | 2.94452                  | 2.55683        |
| Predicted Endpoint (-log C) | 2.18569        | 2.32114                  | 3.62413        |
| Distance                    | 0.546          | 0.588                    | 0.600          |
| Reference                   | NCI/NTP TR-240 | NCI/NTP TR-348           | NCI/NTP TR-050 |

## Model Applicability

Unknown features are fingerprint features in the query molecule, but not found or appearing too infrequently in the training set.

1. All properties and OPS components are within expected ranges.

## Feature Contribution

### Top features for positive contribution

| Fingerprint | Bit/Smiles | Feature Structure                | Score  |
|-------------|------------|----------------------------------|--------|
| FCFP_2      | 1036089772 | <br><chem>[*]:[c](:[*])OC</chem> | 0.0749 |

|                                        |            |                                                                                                                                                  |        |
|----------------------------------------|------------|--------------------------------------------------------------------------------------------------------------------------------------------------|--------|
| FCFP_2                                 | 3          | 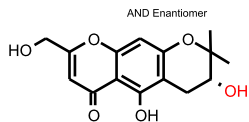 <p>AND Enantiomer</p> <p>[*]O</p>                            | 0.0737 |
| FCFP_2                                 | 332760439  |  <p>AND Enantiomer</p> <p>[*]O[c](-[cH]:[*]):[c]([*]):[*]</p> | 0.0611 |
| Top Features for negative contribution |            |                                                                                                                                                  |        |
| Fingerprint                            | Bit/Smiles | Feature Structure                                                                                                                                | Score  |
| FCFP_2                                 | 7          |  <p>AND Enantiomer</p> <p>[*]O</p>                            | -0.214 |
| FCFP_2                                 | -549108873 |  <p>AND Enantiomer</p> <p>[*]:[c](:[*])O</p>                | -0.127 |
| FCFP_2                                 | 1872154524 |  <p>AND Enantiomer</p> <p>[*]C(=O)[*]</p>                   | -0.105 |



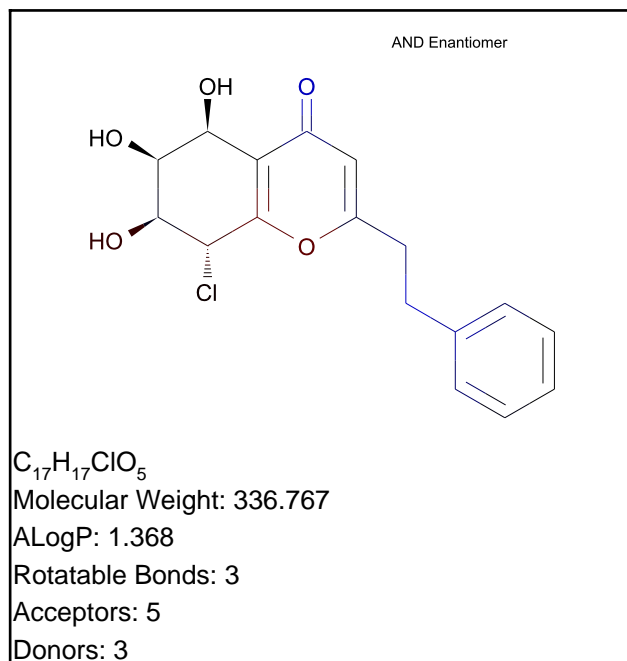

### Model Prediction

Prediction: 0.137

Unit: g/kg\_body\_weight

Mahalanobis Distance: 8.4

Mahalanobis Distance p-value: 0.00859

Mahalanobis Distance: The Mahalanobis distance (MD) is a generalization of the Euclidean distance that accounts for correlations among the X properties. It is calculated as the distance to the center of the training data. The larger the MD, the less trustworthy the prediction.

Mahalanobis Distance p-value: The p-value gives the fraction of training data with an MD greater than or equal to the one for the given sample, assuming normally distributed data. The smaller the p-value, the less trustworthy the prediction. For highly non-normal X properties (e.g., fingerprints), the MD p-value is wildly inaccurate.

### Structural Similar Compounds

| Name                        | ACETOHEXAMIDE                                                                       | TOLAZAMIDE                                                                          | PROPYL GALLATE                                                                      |
|-----------------------------|-------------------------------------------------------------------------------------|-------------------------------------------------------------------------------------|-------------------------------------------------------------------------------------|
| Structure                   | 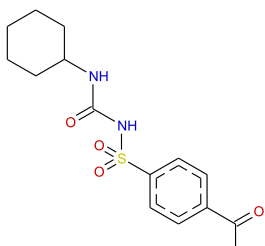 |  |  |
| Actual Endpoint (-log C)    | 2.55683                                                                             | 2.84011                                                                             | 2.59435                                                                             |
| Predicted Endpoint (-log C) | 3.62413                                                                             | 3.59315                                                                             | 2.18569                                                                             |
| Distance                    | 0.513                                                                               | 0.538                                                                               | 0.559                                                                               |
| Reference                   | NCI/NTP TR-050                                                                      | NCI/NTP TR-051                                                                      | NCI/NTP TR-240                                                                      |

### Model Applicability

Unknown features are fingerprint features in the query molecule, but not found or appearing too infrequently in the training set.

1. All properties and OPS components are within expected ranges.

### Feature Contribution

#### Top features for positive contribution

| Fingerprint | Bit/Smiles  | Feature Structure                                                                                                                                                    | Score |
|-------------|-------------|----------------------------------------------------------------------------------------------------------------------------------------------------------------------|-------|
| FCFP_2      | -1143715940 | <p style="text-align: center;">AND Enantiomer</p> 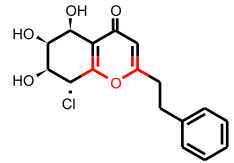 <p>[*]C(=[*])OC(=[*])[*]</p> | 0.095 |

|        |          |                                                                                                                              |        |
|--------|----------|------------------------------------------------------------------------------------------------------------------------------|--------|
| FCFP_2 | 3        | <p>AND Enantiomer</p> 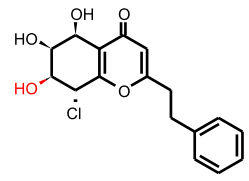 <p>[*]O</p>        | 0.0737 |
| FCFP_2 | 71953198 | <p>AND Enantiomer</p>  <p>[*]C([*])Cl</p> | 0.058  |

### Top Features for negative contribution

| Fingerprint | Bit/Smiles  | Feature Structure                                                                                                                                        | Score   |
|-------------|-------------|----------------------------------------------------------------------------------------------------------------------------------------------------------|---------|
| FCFP_2      | -1272798659 | <p>AND Enantiomer</p> 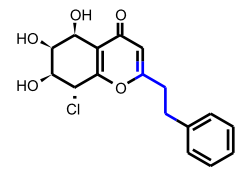 <p>[*]C([*])CC(=[*])[*]</p>                    | -0.111  |
| FCFP_2      | 1872154524  | <p>AND Enantiomer</p>  <p>[*]C(=O)[*]</p>                           | -0.105  |
| FCFP_2      | 203677720   | <p>AND Enantiomer</p>  <p>[*]C([*])[c](:[cH]:[*]<br/>):[cH]:[*]</p> | -0.0829 |



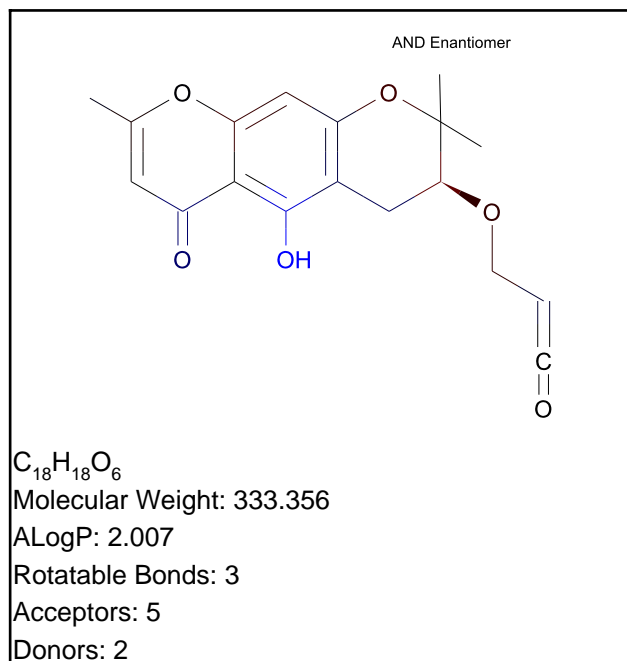

### Model Prediction

Prediction: 0.158

Unit: g/kg\_body\_weight

Mahalanobis Distance: 7.93

Mahalanobis Distance p-value: 0.0293

Mahalanobis Distance: The Mahalanobis distance (MD) is a generalization of the Euclidean distance that accounts for correlations among the X properties. It is calculated as the distance to the center of the training data. The larger the MD, the less trustworthy the prediction.

Mahalanobis Distance p-value: The p-value gives the fraction of training data with an MD greater than or equal to the one for the given sample, assuming normally distributed data. The smaller the p-value, the less trustworthy the prediction. For highly non-normal X properties (e.g., fingerprints), the MD p-value is wildly inaccurate.

### Structural Similar Compounds

| Name                        | TOLAZAMIDE                                                                          | PROPYL GALLATE                                                                      | ACETOHEXAMIDE                                                                       |
|-----------------------------|-------------------------------------------------------------------------------------|-------------------------------------------------------------------------------------|-------------------------------------------------------------------------------------|
| Structure                   | 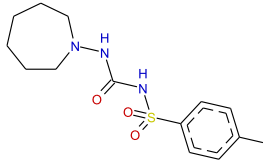 |  |  |
| Actual Endpoint (-log C)    | 2.84011                                                                             | 2.59435                                                                             | 2.55683                                                                             |
| Predicted Endpoint (-log C) | 3.59315                                                                             | 2.18569                                                                             | 3.62413                                                                             |
| Distance                    | 0.476                                                                               | 0.510                                                                               | 0.525                                                                               |
| Reference                   | NCI/NTP TR-051                                                                      | NCI/NTP TR-240                                                                      | NCI/NTP TR-050                                                                      |

### Model Applicability

Unknown features are fingerprint features in the query molecule, but not found or appearing too infrequently in the training set.

1. All properties and OPS components are within expected ranges.
2. Unknown FCFP\_2 feature: 444624378: [\*]C=C=O

### Feature Contribution

#### Top features for positive contribution

| Fingerprint | Bit/Smiles  | Feature Structure                                                                                                                                                    | Score |
|-------------|-------------|----------------------------------------------------------------------------------------------------------------------------------------------------------------------|-------|
| FCFP_2      | -1143715940 | <p style="text-align: center;">AND Enantiomer</p> 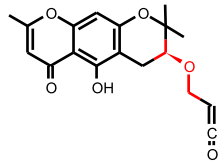 <p>[*]C(=[*])OC(=[*])[*]</p> | 0.095 |



|                                        |            |                                                                                                                                                  |        |
|----------------------------------------|------------|--------------------------------------------------------------------------------------------------------------------------------------------------|--------|
| FCFP_2                                 | 1036089772 | <p>AND Enantiomer</p> 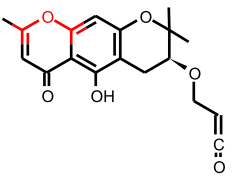 <p>[*]:[c](:[*])OC</p>                 | 0.0749 |
| FCFP_2                                 | 332760439  | <p>AND Enantiomer</p>  <p>[*]O[c](:[cH]:[*]):[c]([*]):[*]</p> | 0.0611 |
| Top Features for negative contribution |            |                                                                                                                                                  |        |
| Fingerprint                            | Bit/Smiles | Feature Structure                                                                                                                                | Score  |
| FCFP_2                                 | 7          | <p>AND Enantiomer</p>  <p>[*]O</p>                            | -0.214 |
| FCFP_2                                 | 549108873  | <p>AND Enantiomer</p>  <p>[*]:[c](:[*])O</p>                | -0.127 |
| FCFP_2                                 | 1872154524 | <p>AND Enantiomer</p>  <p>[*]C(=O)[*]</p>                   | -0.105 |



AND Enantiomer

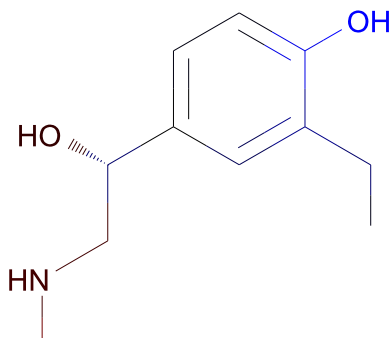C<sub>11</sub>H<sub>17</sub>NO<sub>2</sub>

Molecular Weight: 195.258

ALogP: 1.557

Rotatable Bonds: 4

Acceptors: 3

Donors: 3

## Model Prediction

Prediction: 0.56

Unit: g/kg\_body\_weight

Mahalanobis Distance: 8.32

Mahalanobis Distance p-value: 0.0106

Mahalanobis Distance: The Mahalanobis distance (MD) is a generalization of the Euclidean distance that accounts for correlations among the X properties. It is calculated as the distance to the center of the training data. The larger the MD, the less trustworthy the prediction.

Mahalanobis Distance p-value: The p-value gives the fraction of training data with an MD greater than or equal to the one for the given sample, assuming normally distributed data. The smaller the p-value, the less trustworthy the prediction. For highly non-normal X properties (e.g., fingerprints), the MD p-value is wildly inaccurate.

## Structural Similar Compounds

| Name                        | EPHEDRINE SULFATE | t-BUTYLHYDROQUINONE | PRIMIDONE (PRIMACLONE) |
|-----------------------------|-------------------|---------------------|------------------------|
| Structure                   |                   |                     |                        |
| Actual Endpoint (-log C)    | 4.16695           | 2.44253             | 3.94103                |
| Predicted Endpoint (-log C) | 3.11455           | 2.62758             | 3.24349                |
| Distance                    | 0.414             | 0.521               | 0.546                  |
| Reference                   | NCI/NTP TR-307    | NCI/NTP TR-459      | NCI/NTP TR-476         |

## Model Applicability

Unknown features are fingerprint features in the query molecule, but not found or appearing too infrequently in the training set.

1. All properties and OPS components are within expected ranges.

## Feature Contribution

### Top features for positive contribution

| Fingerprint | Bit/Smiles | Feature Structure                        | Score |
|-------------|------------|------------------------------------------|-------|
| FCFP_2      | -885550502 | <p>AND Enantiomer</p> <p>[*]C([*])NC</p> | 0.115 |

|                                        |            |                                                                                                                                                          |         |
|----------------------------------------|------------|----------------------------------------------------------------------------------------------------------------------------------------------------------|---------|
| FCFP_2                                 | 3          | <p>AND Enantiomer</p> 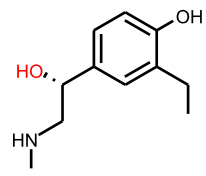 <p>[*]O</p>                                    | 0.0737  |
| Top Features for negative contribution |            |                                                                                                                                                          |         |
| Fingerprint                            | Bit/Smiles | Feature Structure                                                                                                                                        | Score   |
| FCFP_2                                 | 7          | <p>AND Enantiomer</p>  <p>[*]O</p>                                    | -0.214  |
| FCFP_2                                 | -549108873 | <p>AND Enantiomer</p>  <p>[*]:[c](:[*])O</p>                          | -0.127  |
| FCFP_2                                 | 203677720  | <p>AND Enantiomer</p>  <p>[*]C([*])[c](:[cH]:[*]<br/>):[cH]:[*]</p> | -0.0829 |

AND Enantiomer

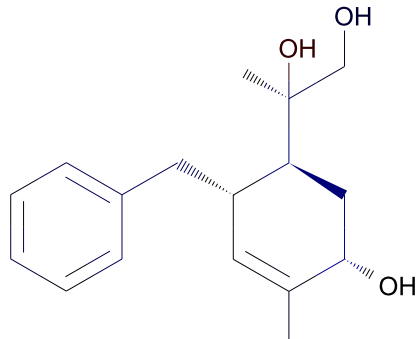 $C_{17}H_{24}O_3$ 

Molecular Weight: 276.371

ALogP: 2.165

Rotatable Bonds: 4

Acceptors: 3

Donors: 3

## Model Prediction

Prediction: 0.243

Unit: g/kg\_body\_weight

Mahalanobis Distance: 8.19

Mahalanobis Distance p-value: 0.0149

Mahalanobis Distance: The Mahalanobis distance (MD) is a generalization of the Euclidean distance that accounts for correlations among the X properties. It is calculated as the distance to the center of the training data. The larger the MD, the less trustworthy the prediction.

Mahalanobis Distance p-value: The p-value gives the fraction of training data with an MD greater than or equal to the one for the given sample, assuming normally distributed data. The smaller the p-value, the less trustworthy the prediction. For highly non-normal X properties (e.g., fingerprints), the MD p-value is wildly inaccurate.

## Structural Similar Compounds

| Name                        | TOLBUTAMIDE    | CHLORPROPAMIDE | PRIMIDONE (PRIMACLONE) |
|-----------------------------|----------------|----------------|------------------------|
| Structure                   |                |                |                        |
| Actual Endpoint (-log C)    | 2.3985         | 3.0107         | 3.94103                |
| Predicted Endpoint (-log C) | 3.32272        | 3.18321        | 3.24349                |
| Distance                    | 0.501          | 0.509          | 0.589                  |
| Reference                   | NCI/NTP TR-031 | NCI/NTP TR-045 | NCI/NTP TR-476         |

## Model Applicability

Unknown features are fingerprint features in the query molecule, but not found or appearing too infrequently in the training set.

1. All properties and OPS components are within expected ranges.

## Feature Contribution

### Top features for positive contribution

| Fingerprint | Bit/Smiles | Feature Structure | Score  |
|-------------|------------|-------------------|--------|
| FCFP_2      | 3          | <p>[*]O</p>       | 0.0737 |

### Top Features for negative contribution

| Fingerprint | Bit/Smiles | Feature Structure | Score |
|-------------|------------|-------------------|-------|
|             |            |                   |       |

|        |             |                                                                                                                                                               |         |
|--------|-------------|---------------------------------------------------------------------------------------------------------------------------------------------------------------|---------|
| FCFP_2 | -1272798659 | <p>AND Enantiomer</p> 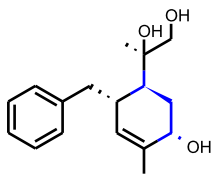 <p><chem>[*]C([*])CC(=[*])[*]</chem></p>            | -0.111  |
| FCFP_2 | 203677720   | <p>AND Enantiomer</p>  <p><chem>[*]C([*])[c](:[cH]:[*])[cH]:[*]</chem></p> | -0.0829 |
| FCFP_2 | 16          | <p>AND Enantiomer</p>  <p><chem>[*][c](:[*]):[*]</chem></p>                | -0.0512 |

# Simeprevir

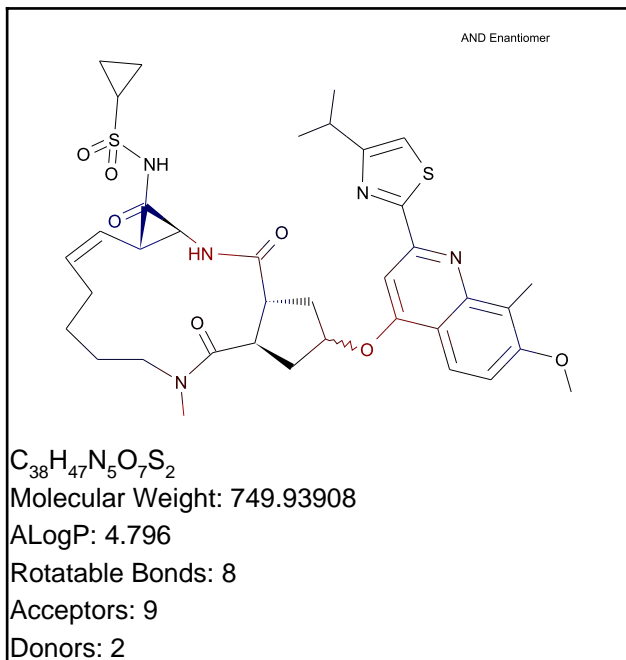

## Model Prediction

Prediction: 0.00297

Unit: g/kg\_body\_weight

Mahalanobis Distance: 14.2

Mahalanobis Distance p-value: 5.46e-013

Mahalanobis Distance: The Mahalanobis distance (MD) is a generalization of the Euclidean distance that accounts for correlations among the X properties. It is calculated as the distance to the center of the training data. The larger the MD, the less trustworthy the prediction.

Mahalanobis Distance p-value: The p-value gives the fraction of training data with an MD greater than or equal to the one for the given sample, assuming normally distributed data. The smaller the p-value, the less trustworthy the prediction. For highly non-normal X properties (e.g., fingerprints), the MD p-value is wildly inaccurate.

# TOPKAT\_Rat\_Maximum\_Tolerated\_Dose\_Feed

## Structural Similar Compounds

| Name                        | C.I.PIGMENT RED 23                                                                  | RESERPINE                                                                           | SALICYLAZOSULFAPYRIDINE                                                             |
|-----------------------------|-------------------------------------------------------------------------------------|-------------------------------------------------------------------------------------|-------------------------------------------------------------------------------------|
| Structure                   | 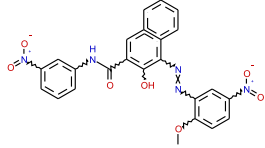 |  |  |
| Actual Endpoint (-log C)    | 2.30052                                                                             | 6.13118                                                                             | 3.375                                                                               |
| Predicted Endpoint (-log C) | 3.55333                                                                             | 4.38304                                                                             | 2.80292                                                                             |
| Distance                    | 0.861                                                                               | 0.934                                                                               | 1.035                                                                               |
| Reference                   | NCI/NTP TR-411                                                                      | NCI/NTP TR-193                                                                      | NCI/NTP TR-457                                                                      |

## Model Applicability

Unknown features are fingerprint features in the query molecule, but not found or appearing too infrequently in the training set.

1. Molecular\_Weight out of range. Value: 749.94. Training min, max, mean, SD: 74.122, 731.95, 245.25, 106.4.
2. OPS PC9 out of range. Value: 5.11. Training min, max, SD, explained variance: -2.8548, 3.3954, 1.263, 0.0360.
3. OPS PC12 out of range. Value: -3.0299. Training min, max, SD, explained variance: -2.364, 2.9228, 1.079, 0.0263.
4. OPS PC14 out of range. Value: 4.236. Training min, max, SD, explained variance: -2.0656, 3.3808, 1.011, 0.0231.
5. Unknown FCFP\_2 feature: 690481386: [\*]:[c](:[\*])[c]1:n:[\*]:[\*]:s:1
6. Unknown FCFP\_2 feature: 1018942292: [\*]NS(=O)(=O)C1[\*][\*]1

## Feature Contribution

### Top features for positive contribution

| Fingerprint | Bit/Smiles | Feature Structure | Score |
|-------------|------------|-------------------|-------|
|             |            |                   |       |

|                                        |             |                                                                                                                                         |        |
|----------------------------------------|-------------|-----------------------------------------------------------------------------------------------------------------------------------------|--------|
| FCFP_2                                 | 136627117   | <p>AND Enantiomer</p> 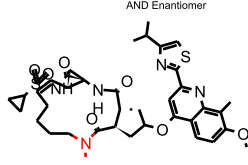 <p>[*]OC</p>                  | 0.173  |
| FCFP_2                                 | -885550502  | <p>AND Enantiomer</p>  <p>[*]C([*])NC</p>            | 0.115  |
| FCFP_2                                 | 1036089772  | <p>AND Enantiomer</p>  <p>[*]:[c](:[*])OC</p>        | 0.0749 |
| Top Features for negative contribution |             |                                                                                                                                         |        |
| Fingerprint                            | Bit/Smiles  | Feature Structure                                                                                                                       | Score  |
| FCFP_2                                 | -1272798659 | <p>AND Enantiomer</p>  <p>[*]C([*])CC(=[*])[*]</p> | -0.111 |
| FCFP_2                                 | 1872154524  | <p>AND Enantiomer</p>  <p>[*]C(=O)[*]</p>          | -0.105 |



FCFP\_2

203677720

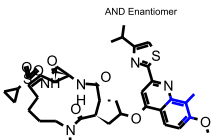

[\*]C([\*])[c](:[cH]:[\*]  
):[cH]:[\*]

-0.0829

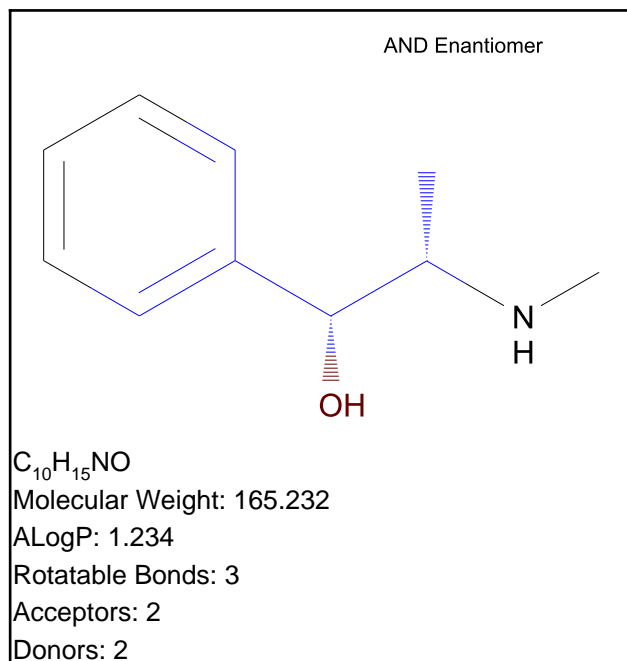

### Model Prediction

Prediction: 1.98

Unit: g/kg\_body\_weight

Mahalanobis Distance: 5.65

Mahalanobis Distance p-value: 0.281

Mahalanobis Distance: The Mahalanobis distance (MD) is a generalization of the Euclidean distance that accounts for correlations among the X properties. It is calculated as the distance to the center of the training data. The larger the MD, the less trustworthy the prediction.

Mahalanobis Distance p-value: The p-value gives the fraction of training data with an MD greater than or equal to the one for the given sample, assuming normally distributed data. The smaller the p-value, the less trustworthy the prediction. For highly non-normal X properties (e.g., fingerprints), the MD p-value is wildly inaccurate.

### Structural Similar Compounds

| Name                        | ALPHA-METHYLBENZYL ALCOHOL                                                          | BENZYL ALCOHOL                                                                      | M-CRESIDINE                                                                         |
|-----------------------------|-------------------------------------------------------------------------------------|-------------------------------------------------------------------------------------|-------------------------------------------------------------------------------------|
| Structure                   | 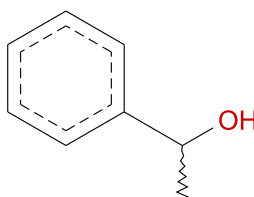 |  |  |
| Actual Endpoint (-log C)    | 2.21189                                                                             | 2.43193                                                                             | 5.93318                                                                             |
| Predicted Endpoint (-log C) | 1.71063                                                                             | 2.09547                                                                             | 3.87056                                                                             |
| Distance                    | 0.437                                                                               | 0.558                                                                               | 0.621                                                                               |
| Reference                   | NCI/NTP TR-369                                                                      | NCI/NTP TR-343                                                                      | NCI/NTP TR-105                                                                      |

### Model Applicability

Unknown features are fingerprint features in the query molecule, but not found or appearing too infrequently in the training set.

1. All properties and OPS components are within expected ranges.
2. Unknown FCFP\_2 feature: 136686699: [\*]NC

### Feature Contribution

#### Top features for positive contribution

| Fingerprint | Bit/Smiles | Feature Structure                                                                                                                                                               | Score |
|-------------|------------|---------------------------------------------------------------------------------------------------------------------------------------------------------------------------------|-------|
| FCFP_2      | 3          | <p style="text-align: center;">AND Enantiomer</p> 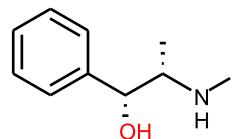 <p style="text-align: center;">[*]O</p> | 0.104 |

#### Top Features for negative contribution

| Fingerprint | Bit/Smiles | Feature Structure | Score |
|-------------|------------|-------------------|-------|
|             |            |                   |       |

|        |           |                                                                                                                                                        |        |
|--------|-----------|--------------------------------------------------------------------------------------------------------------------------------------------------------|--------|
| FCFP_2 | 136597326 | <p>AND Enantiomer</p> 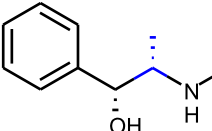 <p>[*]C([*])C</p>                            | -0.489 |
| FCFP_2 | 203677720 | <p>AND Enantiomer</p>  <p>[*]C([*])[c](:[cH]:[*]<br/>):[cH]:[*]</p> | -0.406 |
| FCFP_2 | 0         | <p>AND Enantiomer</p>  <p>[*]C([*])[*]</p>                          | -0.29  |

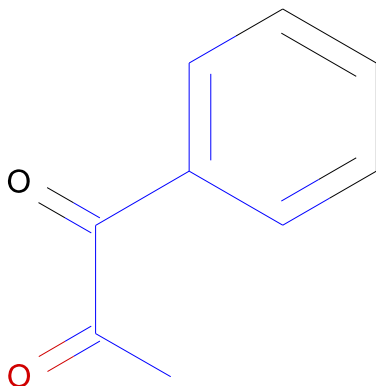

$C_9H_8O_2$

Molecular Weight: 148.159

ALogP: 1.446

Rotatable Bonds: 2

Acceptors: 2

Donors: 0

## Model Prediction

Prediction: 1.39

Unit: g/kg\_body\_weight

Mahalanobis Distance: 5.05

Mahalanobis Distance p-value: 0.552

Mahalanobis Distance: The Mahalanobis distance (MD) is a generalization of the Euclidean distance that accounts for correlations among the X properties. It is calculated as the distance to the center of the training data. The larger the MD, the less trustworthy the prediction.

Mahalanobis Distance p-value: The p-value gives the fraction of training data with an MD greater than or equal to the one for the given sample, assuming normally distributed data. The smaller the p-value, the less trustworthy the prediction. For highly non-normal X properties (e.g., fingerprints), the MD p-value is wildly inaccurate.

## Structural Similar Compounds

| Name                        | BETA-NITROSTYRENE | BENZALDEHYDE   | COUMARIN       |
|-----------------------------|-------------------|----------------|----------------|
| Structure                   |                   |                |                |
| Actual Endpoint (-log C)    | 2.6965            | 2.38236        | 3.76684        |
| Predicted Endpoint (-log C) | 2.69255           | 2.25838        | 3.6624         |
| Distance                    | 0.348             | 0.400          | 0.444          |
| Reference                   | NCI/NTP TR-170    | NCI/NTP TR-378 | NCI/NTP TR-422 |

## Model Applicability

Unknown features are fingerprint features in the query molecule, but not found or appearing too infrequently in the training set.

1. All properties and OPS components are within expected ranges.
2. Unknown FCFP\_2 feature: -1549192822: [\*]C(=[\*])C(=O)[c](:[\*]):[\*]

## Feature Contribution

### Top features for positive contribution

| Fingerprint | Bit/Smiles | Feature Structure | Score |
|-------------|------------|-------------------|-------|
| FCFP_2      | 1          | <br>[*]=O         | 0.511 |

### Top Features for negative contribution

| Fingerprint | Bit/Smiles | Feature Structure | Score |
|-------------|------------|-------------------|-------|
|             |            |                   |       |

|        |            |                                                                                                                                           |        |
|--------|------------|-------------------------------------------------------------------------------------------------------------------------------------------|--------|
| FCFP_2 | 136597326  | 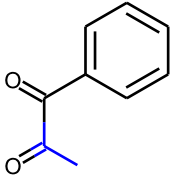<br><chem>[*]C([*])C</chem>                            | -0.489 |
| FCFP_2 | 203677720  | <br><chem>[*]C([*])[c](:[cH]:[*]<br/>):[cH]:[*]</chem> | -0.406 |
| FCFP_2 | 1872154524 | <br><chem>[*]C(=O)[*]</chem>                           | -0.307 |

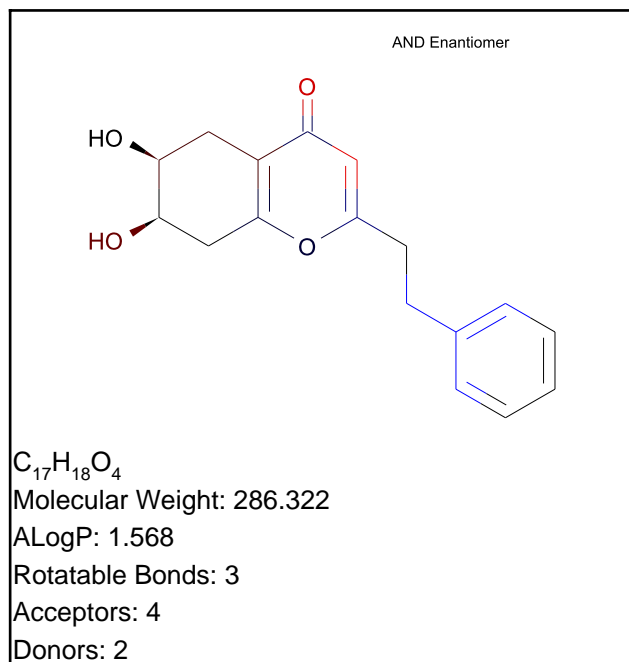

### Model Prediction

Prediction: 0.0368

Unit: g/kg\_body\_weight

Mahalanobis Distance: 9.89

Mahalanobis Distance p-value: 8.04e-006

Mahalanobis Distance: The Mahalanobis distance (MD) is a generalization of the Euclidean distance that accounts for correlations among the X properties. It is calculated as the distance to the center of the training data. The larger the MD, the less trustworthy the prediction.

Mahalanobis Distance p-value: The p-value gives the fraction of training data with an MD greater than or equal to the one for the given sample, assuming normally distributed data. The smaller the p-value, the less trustworthy the prediction. For highly non-normal X properties (e.g., fingerprints), the MD p-value is wildly inaccurate.

### Structural Similar Compounds

| Name                        | PROBENECID                                                                          | 2-AMINO-5-NITROPHENOL                                                               | 2-AMINO-4-NITROPHENOL                                                               |
|-----------------------------|-------------------------------------------------------------------------------------|-------------------------------------------------------------------------------------|-------------------------------------------------------------------------------------|
| Structure                   | 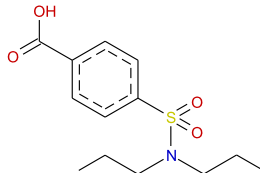 |  |  |
| Actual Endpoint (-log C)    | 2.85333                                                                             | 2.88684                                                                             | 2.78993                                                                             |
| Predicted Endpoint (-log C) | 2.4258                                                                              | 3.28491                                                                             | 3.28491                                                                             |
| Distance                    | 0.714                                                                               | 0.734                                                                               | 0.734                                                                               |
| Reference                   | NCI/NTP TR-395                                                                      | NCI/NTP TR-334                                                                      | NCI/NTP TR-339                                                                      |

### Model Applicability

Unknown features are fingerprint features in the query molecule, but not found or appearing too infrequently in the training set.

1. All properties and OPS components are within expected ranges.
2. Unknown FCFP\_2 feature: 436915834: [\*]C\C(=C\[\*])\O[\*]

### Feature Contribution

| Top features for positive contribution |            |                                                                                                                                                                                  |       |
|----------------------------------------|------------|----------------------------------------------------------------------------------------------------------------------------------------------------------------------------------|-------|
| Fingerprint                            | Bit/Smiles | Feature Structure                                                                                                                                                                | Score |
| FCFP_2                                 | 1          | <p style="text-align: center;">AND Enantiomer</p> 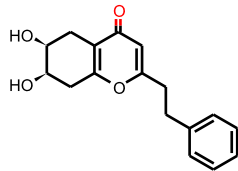 <p style="text-align: center;">[*]=O</p> | 0.511 |

|                                        |            |                                                                                                                                                   |        |
|----------------------------------------|------------|---------------------------------------------------------------------------------------------------------------------------------------------------|--------|
| FCFP_2                                 | 451847724  | <p>AND Enantiomer</p> 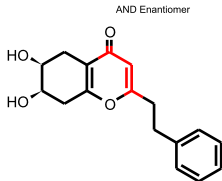 <p>[*]C(=CC(=[*]))[*]</p>               | 0.225  |
| FCFP_2                                 | 3          | <p>AND Enantiomer</p>  <p>[*]O</p>                             | 0.104  |
| Top Features for negative contribution |            |                                                                                                                                                   |        |
| Fingerprint                            | Bit/Smiles | Feature Structure                                                                                                                                 | Score  |
| FCFP_2                                 | 203677720  | <p>AND Enantiomer</p>  <p>[*]C([*])[c](:[cH]:[*]):[cH]:[*]</p> | -0.406 |
| FCFP_2                                 | 1872154524 | <p>AND Enantiomer</p>  <p>[*]C(=O)[*]</p>                    | -0.307 |
| FCFP_2                                 | 0          | <p>AND Enantiomer</p>  <p>[*]C([*])[*]</p>                   | -0.29  |





AND Enantiomer

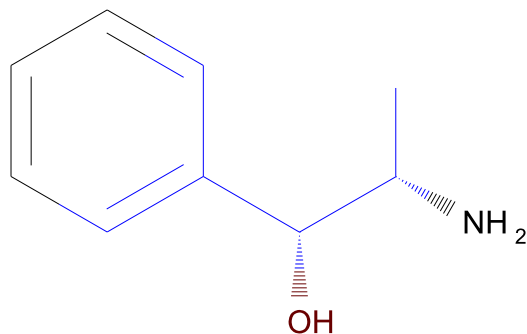 $C_9H_{13}NO$ 

Molecular Weight: 151.206

ALogP: 0.802

Rotatable Bonds: 2

Acceptors: 2

Donors: 2

### Model Prediction

Prediction: 3.02

Unit: g/kg\_body\_weight

Mahalanobis Distance: 5.41

Mahalanobis Distance p-value: 0.384

Mahalanobis Distance: The Mahalanobis distance (MD) is a generalization of the Euclidean distance that accounts for correlations among the X properties. It is calculated as the distance to the center of the training data. The larger the MD, the less trustworthy the prediction.

Mahalanobis Distance p-value: The p-value gives the fraction of training data with an MD greater than or equal to the one for the given sample, assuming normally distributed data. The smaller the p-value, the less trustworthy the prediction. For highly non-normal X properties (e.g., fingerprints), the MD p-value is wildly inaccurate.

### Structural Similar Compounds

| Name                        | ALPHA-METHYLBENZYL ALCOHOL | BENZYL ALCOHOL | HYDROQUINONE   |
|-----------------------------|----------------------------|----------------|----------------|
| Structure                   |                            |                |                |
| Actual Endpoint (-log C)    | 2.21189                    | 2.43193        | 3.34286        |
| Predicted Endpoint (-log C) | 1.71063                    | 2.09547        | 3.36172        |
| Distance                    | 0.405                      | 0.548          | 0.593          |
| Reference                   | NCI/NTP TR-369             | NCI/NTP TR-343 | NCI/NTP TR-366 |

### Model Applicability

Unknown features are fingerprint features in the query molecule, but not found or appearing too infrequently in the training set.

1. All properties and OPS components are within expected ranges.

### Feature Contribution

#### Top features for positive contribution

| Fingerprint | Bit/Smiles | Feature Structure                 | Score |
|-------------|------------|-----------------------------------|-------|
| FCFP_2      | 3          | <p>AND Enantiomer</p> <p>[*]O</p> | 0.104 |

#### Top Features for negative contribution

| Fingerprint | Bit/Smiles | Feature Structure | Score |
|-------------|------------|-------------------|-------|
|             |            |                   |       |

|        |           |                                                                                                                                                        |        |
|--------|-----------|--------------------------------------------------------------------------------------------------------------------------------------------------------|--------|
| FCFP_2 | 136597326 | <p>AND Enantiomer</p> 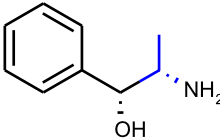 <p>[*]C([*])C</p>                            | -0.489 |
| FCFP_2 | 203677720 | <p>AND Enantiomer</p>  <p>[*]C([*])[c](:[cH]:[*]<br/>):[cH]:[*]</p> | -0.406 |
| FCFP_2 | 0         | <p>AND Enantiomer</p>  <p>[*]C([*])[*]</p>                          | -0.29  |

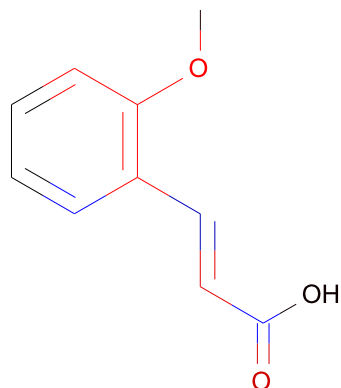
 $C_{10}H_{10}O_3$ 

Molecular Weight: 178.185

ALogP: 1.911

Rotatable Bonds: 3

Acceptors: 3

Donors: 1

### Model Prediction

Prediction: 0.0163

Unit: g/kg\_body\_weight

Mahalanobis Distance: 8.89

Mahalanobis Distance p-value: 0.00017

Mahalanobis Distance: The Mahalanobis distance (MD) is a generalization of the Euclidean distance that accounts for correlations among the X properties. It is calculated as the distance to the center of the training data. The larger the MD, the less trustworthy the prediction.

Mahalanobis Distance p-value: The p-value gives the fraction of training data with an MD greater than or equal to the one for the given sample, assuming normally distributed data. The smaller the p-value, the less trustworthy the prediction. For highly non-normal X properties (e.g., fingerprints), the MD p-value is wildly inaccurate.

### Structural Similar Compounds

| Name                        | M-CRESIDINE    | BETA-NITROSTYRENE | COUMARIN       |
|-----------------------------|----------------|-------------------|----------------|
| Structure                   |                |                   |                |
| Actual Endpoint (-log C)    | 5.93318        | 2.6965            | 3.76684        |
| Predicted Endpoint (-log C) | 3.87056        | 2.69255           | 3.6624         |
| Distance                    | 0.482          | 0.489             | 0.519          |
| Reference                   | NCI/NTP TR-105 | NCI/NTP TR-170    | NCI/NTP TR-422 |

### Model Applicability

Unknown features are fingerprint features in the query molecule, but not found or appearing too infrequently in the training set.

1. OPS PC9 out of range. Value: 2.9649. Training min, max, SD, explained variance: -2.7086, 2.9267, 1.019, 0.0321.

### Feature Contribution

#### Top features for positive contribution

| Fingerprint | Bit/Smiles | Feature Structure                                | Score |
|-------------|------------|--------------------------------------------------|-------|
| FCFP_2      | 332760439  | <br><chem>[*]O[c](-[cH]:[*]):[c]([*]):[*]</chem> | 0.672 |

|                                        |            |                                                                                                                                     |        |
|----------------------------------------|------------|-------------------------------------------------------------------------------------------------------------------------------------|--------|
| FCFP_2                                 | 1          | 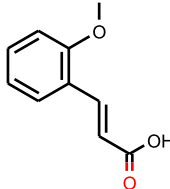<br><chem>[*]=O</chem>                           | 0.511  |
| FCFP_2                                 | 451847724  | <br><chem>[*]C(=CC(=[*]))[*]][*]</chem>          | 0.225  |
| Top Features for negative contribution |            |                                                                                                                                     |        |
| Fingerprint                            | Bit/Smiles | Feature Structure                                                                                                                   | Score  |
| FCFP_2                                 | 203677720  | <br><chem>[*]C([*])[c](:[cH]:[*])[cH]:[*]</chem> | -0.406 |
| FCFP_2                                 | 1872154524 | <br><chem>[*]C(=O)[*]</chem>                    | -0.307 |
| FCFP_2                                 | 0          | <br><chem>[*]C([*])[*]</chem>                  | -0.29  |



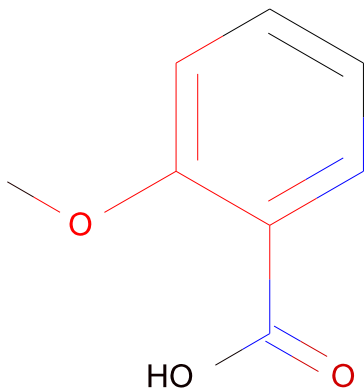C<sub>8</sub>H<sub>8</sub>O<sub>3</sub>

Molecular Weight: 152.147

ALogP: 1.443

Rotatable Bonds: 2

Acceptors: 3

Donors: 1

### Model Prediction

Prediction: 0.0216

Unit: g/kg\_body\_weight

Mahalanobis Distance: 8.52

Mahalanobis Distance p-value: 0.000497

Mahalanobis Distance: The Mahalanobis distance (MD) is a generalization of the Euclidean distance that accounts for correlations among the X properties. It is calculated as the distance to the center of the training data. The larger the MD, the less trustworthy the prediction.

Mahalanobis Distance p-value: The p-value gives the fraction of training data with an MD greater than or equal to the one for the given sample, assuming normally distributed data. The smaller the p-value, the less trustworthy the prediction. For highly non-normal X properties (e.g., fingerprints), the MD p-value is wildly inaccurate.

### Structural Similar Compounds

| Name                        | M-CRESIDINE    | BETA-NITROSTYRENE | COUMARIN       |
|-----------------------------|----------------|-------------------|----------------|
| Structure                   |                |                   |                |
| Actual Endpoint (-log C)    | 5.93318        | 2.6965            | 3.76684        |
| Predicted Endpoint (-log C) | 3.87056        | 2.69255           | 3.6624         |
| Distance                    | 0.397          | 0.543             | 0.552          |
| Reference                   | NCI/NTP TR-105 | NCI/NTP TR-170    | NCI/NTP TR-422 |

### Model Applicability

Unknown features are fingerprint features in the query molecule, but not found or appearing too infrequently in the training set.

1. All properties and OPS components are within expected ranges.

### Feature Contribution

#### Top features for positive contribution

| Fingerprint | Bit/Smiles | Feature Structure                               | Score |
|-------------|------------|-------------------------------------------------|-------|
| FCFP_2      | 332760439  | <br><chem>[*]O[c]([cH]:[*]):[c]([*]):[*]</chem> | 0.672 |

|                                        |            |                                                                                                                        |        |
|----------------------------------------|------------|------------------------------------------------------------------------------------------------------------------------|--------|
| FCFP_2                                 | 1          | 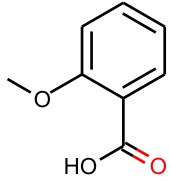<br>[*]=O                           | 0.511  |
| FCFP_2                                 | 136627117  | <br>[*]OC                           | 0.0304 |
| Top Features for negative contribution |            |                                                                                                                        |        |
| Fingerprint                            | Bit/Smiles | Feature Structure                                                                                                      | Score  |
| FCFP_2                                 | 203677720  | <br>[*]C([*])[c](:[cH]:[*])[cH]:[*] | -0.406 |
| FCFP_2                                 | 1872154524 | <br>[*]C(=O)[*]                    | -0.307 |
| FCFP_2                                 | 0          | <br>[*]C([*])[*]                  | -0.29  |





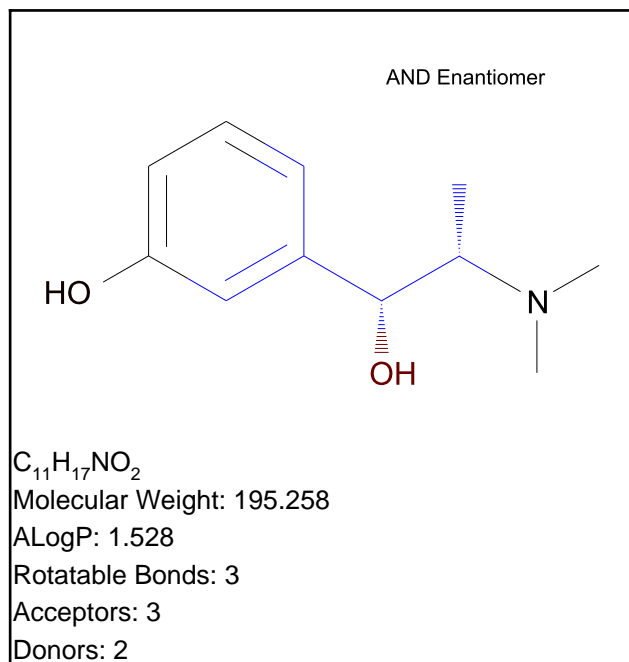

### Model Prediction

Prediction: 0.556

Unit: g/kg\_body\_weight

Mahalanobis Distance: 7.4

Mahalanobis Distance p-value: 0.00953

Mahalanobis Distance: The Mahalanobis distance (MD) is a generalization of the Euclidean distance that accounts for correlations among the X properties. It is calculated as the distance to the center of the training data. The larger the MD, the less trustworthy the prediction.

Mahalanobis Distance p-value: The p-value gives the fraction of training data with an MD greater than or equal to the one for the given sample, assuming normally distributed data. The smaller the p-value, the less trustworthy the prediction. For highly non-normal X properties (e.g., fingerprints), the MD p-value is wildly inaccurate.

### Structural Similar Compounds

| Name                        | 4-HEXYLRESORCINOL | HYDROQUINONE   | RESORCINOL     |
|-----------------------------|-------------------|----------------|----------------|
| Structure                   |                   |                |                |
| Actual Endpoint (-log C)    | 3.1915            | 3.34286        | 2.99262        |
| Predicted Endpoint (-log C) | 2.16134           | 3.36172        | 3.36172        |
| Distance                    | 0.592             | 0.617          | 0.617          |
| Reference                   | NCI/NTP TR-330    | NCI/NTP TR-366 | NCI/NTP TR-403 |

### Model Applicability

Unknown features are fingerprint features in the query molecule, but not found or appearing too infrequently in the training set.

1. All properties and OPS components are within expected ranges.

### Feature Contribution

#### Top features for positive contribution

| Fingerprint | Bit/Smiles | Feature Structure                                                                         | Score |
|-------------|------------|-------------------------------------------------------------------------------------------|-------|
| FCFP_2      | 3          | <p style="text-align: center;">AND Enantiomer</p> <p style="text-align: center;">[*]O</p> | 0.104 |

|                                        |                   |                                                                                                                                                          |              |
|----------------------------------------|-------------------|----------------------------------------------------------------------------------------------------------------------------------------------------------|--------------|
| FCFP_2                                 | 7                 | <p>AND Enantiomer</p> 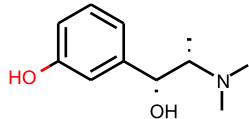 <p>[*]O</p>                                    | 0.0144       |
| FCFP_2                                 | 74595001          | <p>AND Enantiomer</p>  <p>[*]:[cH]:[c](O):[cH]:<br/>[*]</p>           | 0.000246     |
| Top Features for negative contribution |                   |                                                                                                                                                          |              |
| <b>Fingerprint</b>                     | <b>Bit/Smiles</b> | <b>Feature Structure</b>                                                                                                                                 | <b>Score</b> |
| FCFP_2                                 | 136597326         | <p>AND Enantiomer</p>  <p>[*]C([*])C</p>                              | -0.489       |
| FCFP_2                                 | 203677720         | <p>AND Enantiomer</p>  <p>[*]C([*])[c](:[cH]:[*]<br/>):[cH]:[*]</p> | -0.406       |
| FCFP_2                                 | 0                 | <p>AND Enantiomer</p>  <p>[*]C([*])[*]</p>                          | -0.29        |



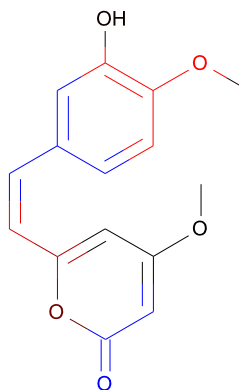C<sub>15</sub>H<sub>14</sub>O<sub>5</sub>

Molecular Weight: 274.269

ALogP: 1.969

Rotatable Bonds: 4

Acceptors: 5

Donors: 1

### Model Prediction

Prediction: 0.00524

Unit: g/kg\_body\_weight

Mahalanobis Distance: 7.78

Mahalanobis Distance p-value: 0.00366

Mahalanobis Distance: The Mahalanobis distance (MD) is a generalization of the Euclidean distance that accounts for correlations among the X properties. It is calculated as the distance to the center of the training data. The larger the MD, the less trustworthy the prediction.

Mahalanobis Distance p-value: The p-value gives the fraction of training data with an MD greater than or equal to the one for the given sample, assuming normally distributed data. The smaller the p-value, the less trustworthy the prediction. For highly non-normal X properties (e.g., fingerprints), the MD p-value is wildly inaccurate.

### Structural Similar Compounds

| Name                        | PROBENECID     | DIALLYL PHTHALATE | DIGLYCIDYL RESORCINOL ETHER (DGRE) |
|-----------------------------|----------------|-------------------|------------------------------------|
| Structure                   |                |                   |                                    |
| Actual Endpoint (-log C)    | 2.85333        | 3.3914            | 4.99464                            |
| Predicted Endpoint (-log C) | 2.4258         | 3.50093           | 4.37491                            |
| Distance                    | 0.642          | 0.674             | 0.688                              |
| Reference                   | NCI/NTP TR-395 | NCI/NTP TR-284    | NCI/NTP TR-257                     |

### Model Applicability

Unknown features are fingerprint features in the query molecule, but not found or appearing too infrequently in the training set.

- OPS PC9 out of range. Value: 5.1682. Training min, max, SD, explained variance: -2.7086, 2.9267, 1.019, 0.0321.
- Unknown FCFP\_2 feature: 436915834: [\*]C\C(=C\[\*])\O[\*]

### Feature Contribution

#### Top features for positive contribution

| Fingerprint | Bit/Smiles | Feature Structure                               | Score |
|-------------|------------|-------------------------------------------------|-------|
| FCFP_2      | 332760439  | <br><chem>[*]O[c]([cH]:[*]):[c]([*]):[*]</chem> | 0.672 |

|                                        |            |                                                                                                                                     |        |
|----------------------------------------|------------|-------------------------------------------------------------------------------------------------------------------------------------|--------|
| FCFP_2                                 | 1          | 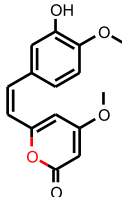<br><chem>[*]=O</chem>                           | 0.511  |
| FCFP_2                                 | 451847724  | <br><chem>[*]C(=CC(=[*]))[*]][*]</chem>          | 0.225  |
| Top Features for negative contribution |            |                                                                                                                                     |        |
| Fingerprint                            | Bit/Smiles | Feature Structure                                                                                                                   | Score  |
| FCFP_2                                 | 203677720  | <br><chem>[*]C([*])[c](:[cH]:[*])[cH]:[*]</chem> | -0.406 |
| FCFP_2                                 | 565998553  | <br><chem>[*]OC(=O)C=[*]</chem>                 | -0.348 |
| FCFP_2                                 | 1872154524 | <br><chem>[*]C(=O)[*]</chem>                   | -0.307 |



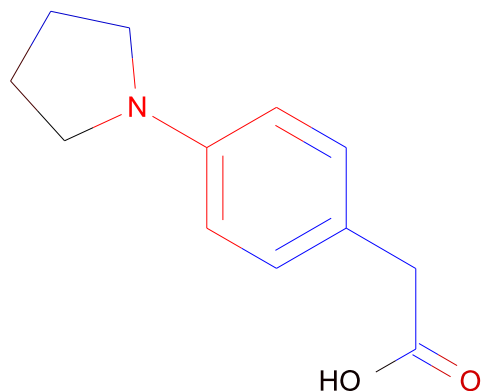

$C_{12}H_{15}NO_2$

Molecular Weight: 205.253

ALogP: 2.117

Rotatable Bonds: 3

Acceptors: 3

Donors: 1

## Model Prediction

Prediction: 0.038

Unit: g/kg\_body\_weight

Mahalanobis Distance: 10.8

Mahalanobis Distance p-value: 4.64e-007

Mahalanobis Distance: The Mahalanobis distance (MD) is a generalization of the Euclidean distance that accounts for correlations among the X properties. It is calculated as the distance to the center of the training data. The larger the MD, the less trustworthy the prediction.

Mahalanobis Distance p-value: The p-value gives the fraction of training data with an MD greater than or equal to the one for the given sample, assuming normally distributed data. The smaller the p-value, the less trustworthy the prediction. For highly non-normal X properties (e.g., fingerprints), the MD p-value is wildly inaccurate.

## Structural Similar Compounds

| Name                        | 3,4-DIHYDROCOUMARIN | M-CRESIDINE    | BETA-NITROSTYRENE |
|-----------------------------|---------------------|----------------|-------------------|
| Structure                   |                     |                |                   |
| Actual Endpoint (-log C)    | 2.69361             | 5.93318        | 2.6965            |
| Predicted Endpoint (-log C) | 3.51534             | 3.87056        | 2.69255           |
| Distance                    | 0.567               | 0.580          | 0.606             |
| Reference                   | NCI/NTP TR-423      | NCI/NTP TR-105 | NCI/NTP TR-170    |

## Model Applicability

Unknown features are fingerprint features in the query molecule, but not found or appearing too infrequently in the training set.

1. All properties and OPS components are within expected ranges.

## Feature Contribution

### Top features for positive contribution

| Fingerprint | Bit/Smiles | Feature Structure                               | Score |
|-------------|------------|-------------------------------------------------|-------|
| FCFP_2      | 332760439  | <br><chem>[*]O[c]([cH]:[*]):[c]([*]):[*]</chem> | 0.672 |

|                                        |             |                                                                                                                             |        |
|----------------------------------------|-------------|-----------------------------------------------------------------------------------------------------------------------------|--------|
| FCFP_2                                 | 1           | 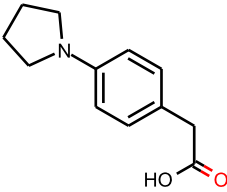<br>[*]=O                                | 0.511  |
| FCFP_2                                 | -1272798659 | <br>[*]C([*])CC(=[*])[*]                 | 0.0703 |
| Top Features for negative contribution |             |                                                                                                                             |        |
| Fingerprint                            | Bit/Smiles  | Feature Structure                                                                                                           | Score  |
| FCFP_2                                 | 203677720   | <br>[*]C([*])[c](:[cH]:[*]<br>):[cH]:[*] | -0.406 |
| FCFP_2                                 | 1872154524  | <br>[*]C(=O)[*]                        | -0.307 |
| FCFP_2                                 | 0           | <br>[*]C([*])[*]                       | -0.29  |





AND Enantiomer

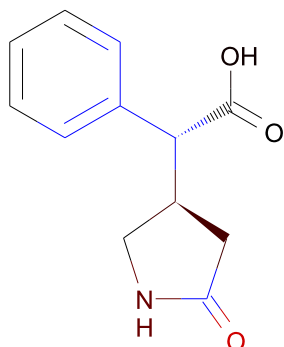C<sub>12</sub>H<sub>13</sub>NO<sub>3</sub>

Molecular Weight: 219.237

ALogP: 0.621

Rotatable Bonds: 3

Acceptors: 3

Donors: 2

## Model Prediction

Prediction: 0.331

Unit: g/kg\_body\_weight

Mahalanobis Distance: 7.53

Mahalanobis Distance p-value: 0.00699

Mahalanobis Distance: The Mahalanobis distance (MD) is a generalization of the Euclidean distance that accounts for correlations among the X properties. It is calculated as the distance to the center of the training data. The larger the MD, the less trustworthy the prediction.

Mahalanobis Distance p-value: The p-value gives the fraction of training data with an MD greater than or equal to the one for the given sample, assuming normally distributed data. The smaller the p-value, the less trustworthy the prediction. For highly non-normal X properties (e.g., fingerprints), the MD p-value is wildly inaccurate.

## Structural Similar Compounds

| Name                        | 2-AMINO-5-NITROPHENOL | 2-AMINO-4-NITROPHENOL | PROBENECID     |
|-----------------------------|-----------------------|-----------------------|----------------|
| Structure                   |                       |                       |                |
| Actual Endpoint (-log C)    | 2.88684               | 2.78993               | 2.85333        |
| Predicted Endpoint (-log C) | 3.28491               | 3.28491               | 2.4258         |
| Distance                    | 0.626                 | 0.626                 | 0.729          |
| Reference                   | NCI/NTP TR-334        | NCI/NTP TR-339        | NCI/NTP TR-395 |

## Model Applicability

Unknown features are fingerprint features in the query molecule, but not found or appearing too infrequently in the training set.

1. All properties and OPS components are within expected ranges.

## Feature Contribution

### Top features for positive contribution

| Fingerprint | Bit/Smiles | Feature Structure                  | Score |
|-------------|------------|------------------------------------|-------|
| FCFP_2      | 1          | <p>AND Enantiomer</p> <p>[*]=O</p> | 0.511 |

|                                        |             |                                                                                                                                                        |        |
|----------------------------------------|-------------|--------------------------------------------------------------------------------------------------------------------------------------------------------|--------|
| FCFP_2                                 | 3           | <p>AND Enantiomer</p> 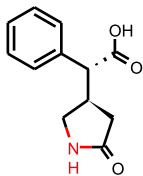 <p>[*]O</p>                                  | 0.104  |
| FCFP_2                                 | -1272798659 | <p>AND Enantiomer</p>  <p>[*]C([*])CC(=[*])[*]</p>                  | 0.0703 |
| Top Features for negative contribution |             |                                                                                                                                                        |        |
| Fingerprint                            | Bit/Smiles  | Feature Structure                                                                                                                                      | Score  |
| FCFP_2                                 | 203677720   | <p>AND Enantiomer</p>  <p>[*]C([*])[c](:[cH]:[*]<br/>):[cH]:[*]</p> | -0.406 |
| FCFP_2                                 | 1872154524  | <p>AND Enantiomer</p>  <p>[*]C(=O)[*]</p>                         | -0.307 |
| FCFP_2                                 | 0           | <p>AND Enantiomer</p>  <p>[*]C([*])[*]</p>                        | -0.29  |



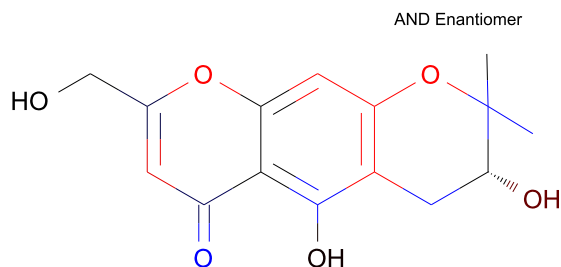

$C_{15}H_{16}O_6$

Molecular Weight: 292.284

ALogP: 0.901

Rotatable Bonds: 1

Acceptors: 6

Donors: 3

## Model Prediction

Prediction: 0.00151

Unit: g/kg\_body\_weight

Mahalanobis Distance: 8.59

Mahalanobis Distance p-value: 0.000403

Mahalanobis Distance: The Mahalanobis distance (MD) is a generalization of the Euclidean distance that accounts for correlations among the X properties. It is calculated as the distance to the center of the training data. The larger the MD, the less trustworthy the prediction.

Mahalanobis Distance p-value: The p-value gives the fraction of training data with an MD greater than or equal to the one for the given sample, assuming normally distributed data. The smaller the p-value, the less trustworthy the prediction. For highly non-normal X properties (e.g., fingerprints), the MD p-value is wildly inaccurate.

## Structural Similar Compounds

| Name                        | HC RED 3       | PENICILLIN VK  | 2-AMINO-5-NITROPHENOL |
|-----------------------------|----------------|----------------|-----------------------|
| Structure                   |                |                |                       |
| Actual Endpoint (-log C)    | 2.59592        | 2.54455        | 2.88684               |
| Predicted Endpoint (-log C) | 3.285          | 3.9702         | 3.28491               |
| Distance                    | 0.643          | 0.690          | 0.715                 |
| Reference                   | NCI/NTP TR-281 | NCI/NTP TR-336 | NCI/NTP TR-334        |

## Model Applicability

Unknown features are fingerprint features in the query molecule, but not found or appearing too infrequently in the training set.

1. All properties and OPS components are within expected ranges.
2. Unknown FCFP\_2 feature: 436915834: [\*]C\C(=C\[\*])\O[\*]
3. Unknown FCFP\_2 feature: -1549192822: [\*]C(=[\*])C(=O)[c]([\*]):[\*]

## Feature Contribution

### Top features for positive contribution

| Fingerprint | Bit/Smiles | Feature Structure                               | Score |
|-------------|------------|-------------------------------------------------|-------|
| FCFP_2      | 332760439  | <br><chem>[*]O[c]([cH]:[*]):[c]([*]):[*]</chem> | 0.672 |

|                                        |            |                                                                                                                                                          |        |
|----------------------------------------|------------|----------------------------------------------------------------------------------------------------------------------------------------------------------|--------|
| FCFP_2                                 | 1          | <p>AND Enantiomer</p> 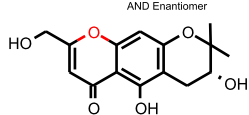 <p>[*]=O</p>                                   | 0.511  |
| FCFP_2                                 | 451847724  | <p>AND Enantiomer</p>  <p>[*]C(=CC(=[*]))[*]</p>                      | 0.225  |
| Top Features for negative contribution |            |                                                                                                                                                          |        |
| Fingerprint                            | Bit/Smiles | Feature Structure                                                                                                                                        | Score  |
| FCFP_2                                 | 136597326  | <p>AND Enantiomer</p>  <p>[*]C([*])C</p>                              | -0.489 |
| FCFP_2                                 | 203677720  | <p>AND Enantiomer</p>  <p>[*]C([*])[c](:[cH]:[*]<br/>):[cH]:[*]</p> | -0.406 |
| FCFP_2                                 | 1872154524 | <p>AND Enantiomer</p>  <p>[*]C(=O)[*]</p>                           | -0.307 |



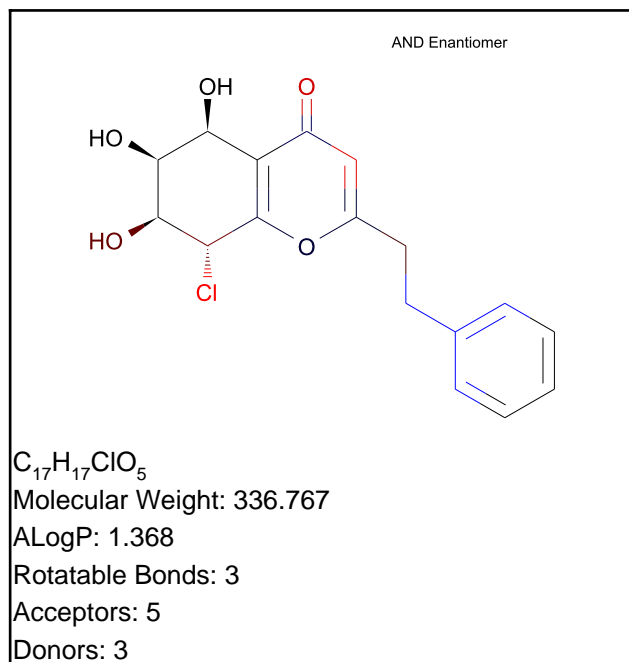

### Model Prediction

Prediction: 0.00357

Unit: g/kg\_body\_weight

Mahalanobis Distance: 13.7

Mahalanobis Distance p-value: 3.71e-011

Mahalanobis Distance: The Mahalanobis distance (MD) is a generalization of the Euclidean distance that accounts for correlations among the X properties. It is calculated as the distance to the center of the training data. The larger the MD, the less trustworthy the prediction.

Mahalanobis Distance p-value: The p-value gives the fraction of training data with an MD greater than or equal to the one for the given sample, assuming normally distributed data. The smaller the p-value, the less trustworthy the prediction. For highly non-normal X properties (e.g., fingerprints), the MD p-value is wildly inaccurate.

### Structural Similar Compounds

| Name                        | HC RED 3                                                                            | PENICILLIN VK                                                                       | OCHRATOXIN                                                                          |
|-----------------------------|-------------------------------------------------------------------------------------|-------------------------------------------------------------------------------------|-------------------------------------------------------------------------------------|
| Structure                   | 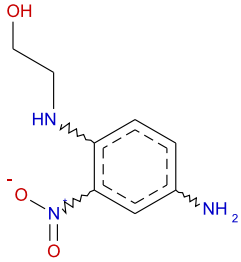 |  |  |
| Actual Endpoint (-log C)    | 2.59592                                                                             | 2.54455                                                                             | 6.28396                                                                             |
| Predicted Endpoint (-log C) | 3.285                                                                               | 3.9702                                                                              | 5.12358                                                                             |
| Distance                    | 0.690                                                                               | 0.721                                                                               | 0.757                                                                               |
| Reference                   | NCI/NTP TR-281                                                                      | NCI/NTP TR-336                                                                      | NCI/NTP TR-358                                                                      |

### Model Applicability

Unknown features are fingerprint features in the query molecule, but not found or appearing too infrequently in the training set.

1. All properties and OPS components are within expected ranges.
2. Unknown FCFP\_2 feature: 436915834: [\*]C\C(=C\[\*])\O[\*]

### Feature Contribution

#### Top features for positive contribution

| Fingerprint | Bit/Smiles | Feature Structure                                                                                                                                                                | Score |
|-------------|------------|----------------------------------------------------------------------------------------------------------------------------------------------------------------------------------|-------|
| FCFP_2      | 32         | <p style="text-align: center;">AND Enantiomer</p> 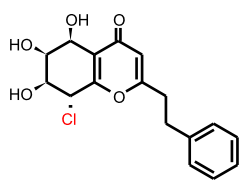 <p style="text-align: center;">[*]Cl</p> | 0.526 |



|                                        |            |                                                                                                                                                   |        |
|----------------------------------------|------------|---------------------------------------------------------------------------------------------------------------------------------------------------|--------|
| FCFP_2                                 | 1          | <p>AND Enantiomer</p> 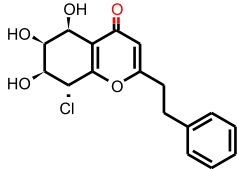 <p>[*]=O</p>                            | 0.511  |
| FCFP_2                                 | 451847724  | <p>AND Enantiomer</p>  <p>[*]C(=CC(=[*]))[*]</p>               | 0.225  |
| Top Features for negative contribution |            |                                                                                                                                                   |        |
| Fingerprint                            | Bit/Smiles | Feature Structure                                                                                                                                 | Score  |
| FCFP_2                                 | 203677720  | <p>AND Enantiomer</p>  <p>[*]C([*])[c](:[cH]:[*]):[cH]:[*]</p> | -0.406 |
| FCFP_2                                 | 1872154524 | <p>AND Enantiomer</p>  <p>[*]C(=O)[*]</p>                    | -0.307 |
| FCFP_2                                 | 0          | <p>AND Enantiomer</p>  <p>[*]C([*])[*]</p>                   | -0.29  |



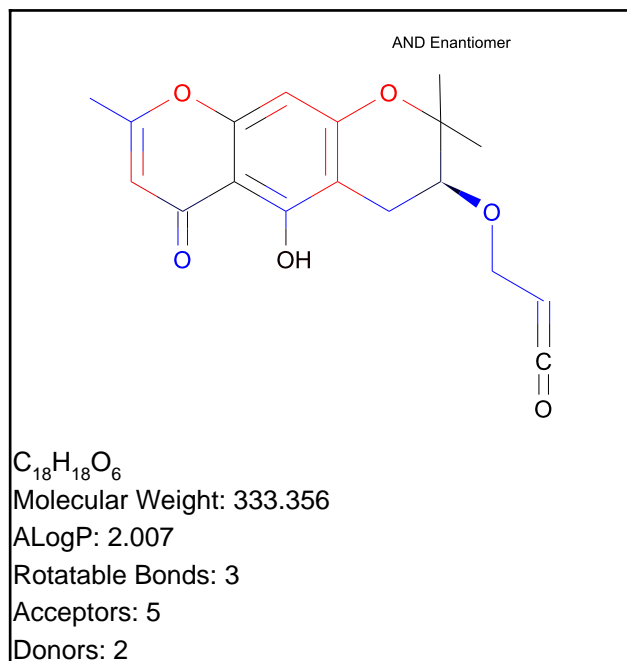

### Model Prediction

Prediction: 0.0136

Unit: g/kg\_body\_weight

Mahalanobis Distance: 12.3

Mahalanobis Distance p-value: 3.13e-009

Mahalanobis Distance: The Mahalanobis distance (MD) is a generalization of the Euclidean distance that accounts for correlations among the X properties. It is calculated as the distance to the center of the training data. The larger the MD, the less trustworthy the prediction.

Mahalanobis Distance p-value: The p-value gives the fraction of training data with an MD greater than or equal to the one for the given sample, assuming normally distributed data. The smaller the p-value, the less trustworthy the prediction. For highly non-normal X properties (e.g., fingerprints), the MD p-value is wildly inaccurate.

### Structural Similar Compounds

| Name                        | PENICILLIN VK                                                                       | PROBENECID                                                                          | 2-AMINO-5-NITROPHENOL                                                               |
|-----------------------------|-------------------------------------------------------------------------------------|-------------------------------------------------------------------------------------|-------------------------------------------------------------------------------------|
| Structure                   | 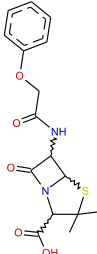 |  |  |
| Actual Endpoint (-log C)    | 2.54455                                                                             | 2.85333                                                                             | 2.88684                                                                             |
| Predicted Endpoint (-log C) | 3.9702                                                                              | 2.4258                                                                              | 3.28491                                                                             |
| Distance                    | 0.629                                                                               | 0.726                                                                               | 0.789                                                                               |
| Reference                   | NCI/NTP TR-336                                                                      | NCI/NTP TR-395                                                                      | NCI/NTP TR-334                                                                      |

### Model Applicability

Unknown features are fingerprint features in the query molecule, but not found or appearing too infrequently in the training set.

1. OPS PC9 out of range. Value: 3.0934. Training min, max, SD, explained variance: -2.7086, 2.9267, 1.019, 0.0321.
2. Unknown FCFP\_2 feature: 436915834: [\*]C\C(=C[\*])\O[\*]
3. Unknown FCFP\_2 feature: -1549192822: [\*]C(=[\*])C(=O)[c](:[\*]):[\*]
4. Unknown FCFP\_2 feature: 444624378: [\*]C=C=O

### Feature Contribution

#### Top features for positive contribution

| Fingerprint | Bit/Smiles | Feature Structure                                                                                                                     | Score |
|-------------|------------|---------------------------------------------------------------------------------------------------------------------------------------|-------|
| FCFP_2      | 332760439  | 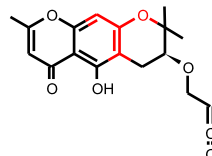<br><chem>[*]O[c](:[cH]:[*]):[c]([*]):[*]</chem> | 0.672 |

|                                        |            |                                                                                                                                                           |        |
|----------------------------------------|------------|-----------------------------------------------------------------------------------------------------------------------------------------------------------|--------|
| FCFP_2                                 | 1          | <p>AND Enantiomer</p> 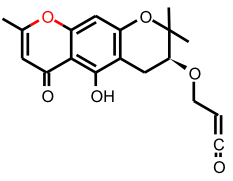 <p>[*]=O</p>                                    | 0.511  |
| FCFP_2                                 | 451847724  | <p>AND Enantiomer</p>  <p>[*]C(=CC(=[*]))[*]</p>                       | 0.225  |
| Top Features for negative contribution |            |                                                                                                                                                           |        |
| Fingerprint                            | Bit/Smiles | Feature Structure                                                                                                                                         | Score  |
| FCFP_2                                 | 136597326  | <p>AND Enantiomer</p>  <p>[*]C([*])C</p>                               | -0.489 |
| FCFP_2                                 | 203677720  | <p>AND Enantiomer</p>  <p>[*]C([*])[c](:[cH]):[*]<br/>]:[cH]:[*]</p> | -0.406 |
| FCFP_2                                 | 1872154524 | <p>AND Enantiomer</p>  <p>[*]C(=O)[*]</p>                            | -0.307 |



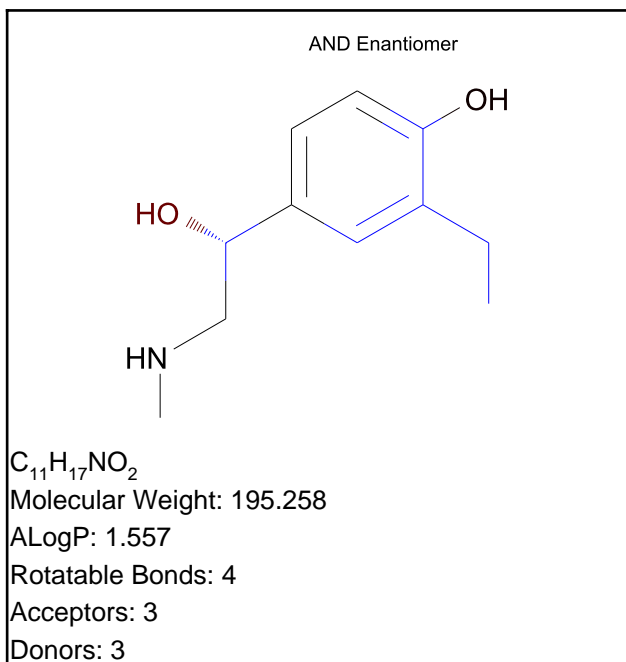

### Model Prediction

Prediction: 0.91

Unit: g/kg\_body\_weight

Mahalanobis Distance: 6.08

Mahalanobis Distance p-value: 0.148

Mahalanobis Distance: The Mahalanobis distance (MD) is a generalization of the Euclidean distance that accounts for correlations among the X properties. It is calculated as the distance to the center of the training data. The larger the MD, the less trustworthy the prediction.

Mahalanobis Distance p-value: The p-value gives the fraction of training data with an MD greater than or equal to the one for the given sample, assuming normally distributed data. The smaller the p-value, the less trustworthy the prediction. For highly non-normal X properties (e.g., fingerprints), the MD p-value is wildly inaccurate.

### Structural Similar Compounds

| Name                        | 4-HEXYLRESORCINOL                                                                   | 2,4-DIAMINOPHENOL DIHYDROCHLORIDE                                                   | RESORCINOL                                                                          |
|-----------------------------|-------------------------------------------------------------------------------------|-------------------------------------------------------------------------------------|-------------------------------------------------------------------------------------|
| Structure                   | 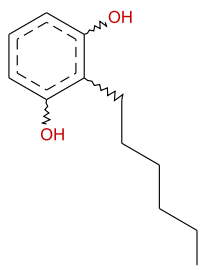 |  |  |
| Actual Endpoint (-log C)    | 3.1915                                                                              | 3.69598                                                                             | 2.99262                                                                             |
| Predicted Endpoint (-log C) | 2.16134                                                                             | 3.37438                                                                             | 3.36172                                                                             |
| Distance                    | 0.600                                                                               | 0.717                                                                               | 0.735                                                                               |
| Reference                   | NCI/NTP TR-330                                                                      | NCI/NTP TR-401                                                                      | NCI/NTP TR-403                                                                      |

### Model Applicability

Unknown features are fingerprint features in the query molecule, but not found or appearing too infrequently in the training set.

1. All properties and OPS components are within expected ranges.
2. Unknown FCFP\_2 feature: 136686699: [\*]NC

### Feature Contribution

| Top features for positive contribution |            |                                                                                                                                                                                 |       |
|----------------------------------------|------------|---------------------------------------------------------------------------------------------------------------------------------------------------------------------------------|-------|
| Fingerprint                            | Bit/Smiles | Feature Structure                                                                                                                                                               | Score |
| FCFP_2                                 | 3          | <p style="text-align: center;">AND Enantiomer</p> 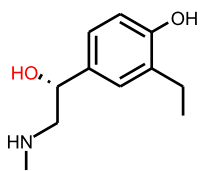 <p style="text-align: center;">[*]O</p> | 0.104 |

|                                        |            |                                                                                                                                                          |          |
|----------------------------------------|------------|----------------------------------------------------------------------------------------------------------------------------------------------------------|----------|
| FCFP_2                                 | 7          | <p>AND Enantiomer</p> 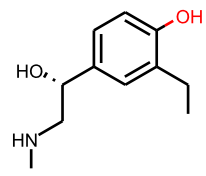 <p>[*]O</p>                                    | 0.0144   |
| FCFP_2                                 | 74595001   | <p>AND Enantiomer</p>  <p>[*]:[cH]:[c](O):[cH]:<br/>[*]</p>           | 0.000246 |
| Top Features for negative contribution |            |                                                                                                                                                          |          |
| Fingerprint                            | Bit/Smiles | Feature Structure                                                                                                                                        | Score    |
| FCFP_2                                 | 136597326  | <p>AND Enantiomer</p>  <p>[*]C([*])C</p>                              | -0.489   |
| FCFP_2                                 | 203677720  | <p>AND Enantiomer</p>  <p>[*]C([*])[c](:[cH]:[*]<br/>):[cH]:[*]</p> | -0.406   |
| FCFP_2                                 | 0          | <p>AND Enantiomer</p>  <p>[*]C([*])[*]</p>                          | -0.29    |





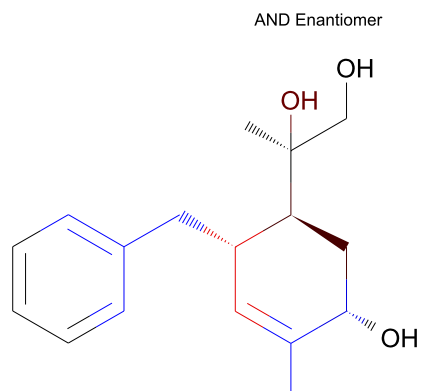
 $C_{17}H_{24}O_3$ 

Molecular Weight: 276.371

ALogP: 2.165

Rotatable Bonds: 4

Acceptors: 3

Donors: 3

## Model Prediction

Prediction: 0.59

Unit: g/kg\_body\_weight

Mahalanobis Distance: 9.11

Mahalanobis Distance p-value: 8.71e-005

Mahalanobis Distance: The Mahalanobis distance (MD) is a generalization of the Euclidean distance that accounts for correlations among the X properties. It is calculated as the distance to the center of the training data. The larger the MD, the less trustworthy the prediction.

Mahalanobis Distance p-value: The p-value gives the fraction of training data with an MD greater than or equal to the one for the given sample, assuming normally distributed data. The smaller the p-value, the less trustworthy the prediction. For highly non-normal X properties (e.g., fingerprints), the MD p-value is wildly inaccurate.

## Structural Similar Compounds

| Name                        | 4-HEXYLRESORCINOL | HC RED 3       | LITHOCHLOLIC ACID |
|-----------------------------|-------------------|----------------|-------------------|
| Structure                   |                   |                |                   |
| Actual Endpoint (-log C)    | 3.1915            | 2.59592        | 2.87689           |
| Predicted Endpoint (-log C) | 2.16134           | 3.285          | 3.8262            |
| Distance                    | 0.707             | 0.808          | 0.847             |
| Reference                   | NCI/NTP TR-330    | NCI/NTP TR-281 | NCI/NTP TR-175    |

## Model Applicability

Unknown features are fingerprint features in the query molecule, but not found or appearing too infrequently in the training set.

1. All properties and OPS components are within expected ranges.
2. Unknown FCFP\_2 feature: -415156552: [\*]C[C@](C)(O)C([\*])([\*])

## Feature Contribution

### Top features for positive contribution

| Fingerprint | Bit/Smiles | Feature Structure                                    | Score |
|-------------|------------|------------------------------------------------------|-------|
| FCFP_2      | 451847724  | <p>AND Enantiomer</p> <p>[*]C(=CC(=[*])([*]))[*]</p> | 0.225 |

|                                        |                   |                                                                                                                                                          |              |
|----------------------------------------|-------------------|----------------------------------------------------------------------------------------------------------------------------------------------------------|--------------|
| FCFP_2                                 | 3                 | <p>AND Enantiomer</p> 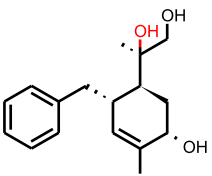 <p>[*]O</p>                                    | 0.104        |
| FCFP_2                                 | -1272798659       | <p>AND Enantiomer</p>  <p>[*]C([*])CC(=[*])[*]</p>                    | 0.0703       |
| Top Features for negative contribution |                   |                                                                                                                                                          |              |
| <b>Fingerprint</b>                     | <b>Bit/Smiles</b> | <b>Feature Structure</b>                                                                                                                                 | <b>Score</b> |
| FCFP_2                                 | 136597326         | <p>AND Enantiomer</p>  <p>[*]C([*])C</p>                              | -0.489       |
| FCFP_2                                 | 203677720         | <p>AND Enantiomer</p>  <p>[*]C([*])[c](:[cH]:[*]<br/>):[cH]:[*]</p> | -0.406       |
| FCFP_2                                 | 0                 | <p>AND Enantiomer</p>  <p>[*]C([*])[*]</p>                          | -0.29        |



# Simeprevir

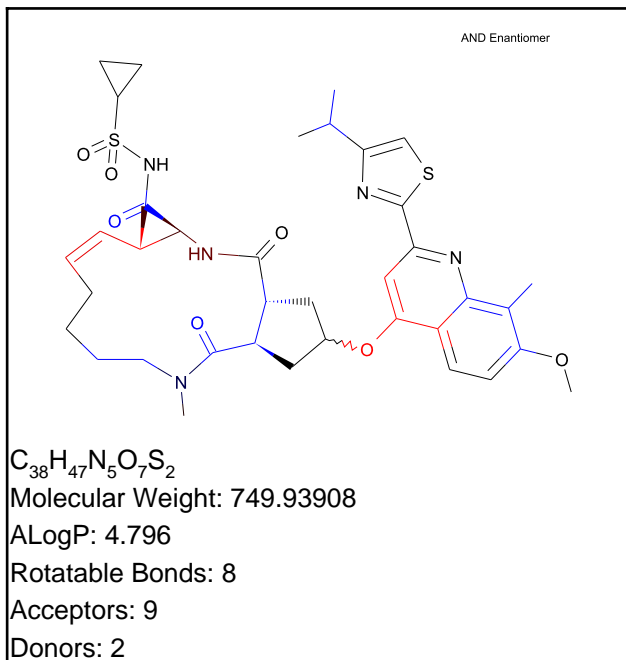

## Model Prediction

Prediction: 0.000856

Unit: g/kg\_body\_weight

Mahalanobis Distance: 16.8

Mahalanobis Distance p-value: 1.77e-015

Mahalanobis Distance: The Mahalanobis distance (MD) is a generalization of the Euclidean distance that accounts for correlations among the X properties. It is calculated as the distance to the center of the training data. The larger the MD, the less trustworthy the prediction.

Mahalanobis Distance p-value: The p-value gives the fraction of training data with an MD greater than or equal to the one for the given sample, assuming normally distributed data. The smaller the p-value, the less trustworthy the prediction. For highly non-normal X properties (e.g., fingerprints), the MD p-value is wildly inaccurate.

# TOPKAT\_Rat\_Maximum\_Tolerated\_Dose\_Gavage

## Structural Similar Compounds

| Name                        | OCHRATOXIN                                                                          | PENICILLIN VK                                                                       | AMPICILLIN TRIHYDRATE                                                               |
|-----------------------------|-------------------------------------------------------------------------------------|-------------------------------------------------------------------------------------|-------------------------------------------------------------------------------------|
| Structure                   | 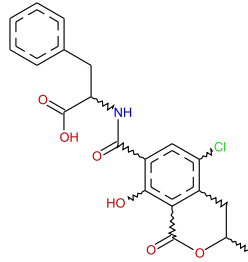 |  |  |
| Actual Endpoint (-log C)    | 6.28396                                                                             | 2.54455                                                                             | 2.36724                                                                             |
| Predicted Endpoint (-log C) | 5.12358                                                                             | 3.9702                                                                              | 2.27651                                                                             |
| Distance                    | 1.425                                                                               | 1.545                                                                               | 1.716                                                                               |
| Reference                   | NCI/NTP TR-358                                                                      | NCI/NTP TR-336                                                                      | NCI/NTP TR-318                                                                      |

## Model Applicability

Unknown features are fingerprint features in the query molecule, but not found or appearing too infrequently in the training set.

1. Molecular\_Weight out of range. Value: 749.94. Training min, max, mean, SD: 68.074, 434.63, 171.13, 85.06.
2. Num\_H\_Acceptors out of range. Value: 9. Training min, max, mean, SD: 0, 6, 1.6146, 1.644.
3. Num\_AromaticRings out of range. Value: 3. Training min, max, mean, SD: 0, 2, 0.5625, 0.693.
4. Molecular\_PolarSASA out of range. Value: 272.1. Training min, max, mean, SD: 0, 223.97, 50.816, 55.15.
5. Molecular\_PolarSurfaceArea out of range. Value: 193.5. Training min, max, mean, SD: 0, 138.03, 28.978, 32.1.
6. OPS PC1 out of range. Value: 9.6287. Training min, max, SD, explained variance: -4.0008, 7.9165, 2.861, 0.2531.
7. OPS PC6 out of range. Value: -3.4118. Training min, max, SD, explained variance: -2.4321, 2.9885, 1.256, 0.0488.
8. Unknown FCFP\_2 feature: -415156552: [\*]C[C@](C)(O)C([\*])([\*])
9. Unknown FCFP\_2 feature: 690511177: [\*]:[cH]:[c](:n:[\*])[c](:[\*]):[\*]
10. Unknown FCFP\_2 feature: 690481386: [\*]:[c](:[\*])[c]1:n:[\*]:[\*]:s:1
11. Unknown FCFP\_2 feature: 1018942292: [\*]NS(=O)(=O)C1[\*][\*]1

## Feature Contribution

### Top features for positive contribution

| Fingerprint | Bit/Smiles | Feature Structure | Score |
|-------------|------------|-------------------|-------|
|-------------|------------|-------------------|-------|

|                                        |            |                                                                                                                                                     |        |
|----------------------------------------|------------|-----------------------------------------------------------------------------------------------------------------------------------------------------|--------|
| FCFP_2                                 | 332760439  | <p>AND Enantiomer</p> 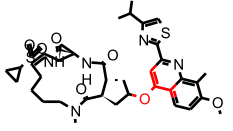 <p>[*]O[c](:[cH]:[*]):[c]([*]):[*]</p>    | 0.672  |
| FCFP_2                                 | 1          | <p>AND Enantiomer</p>  <p>[*]=O</p>                              | 0.511  |
| FCFP_2                                 | 451847724  | <p>AND Enantiomer</p>  <p>[*]C(=CC(=[*])[*])[*]</p>              | 0.225  |
| Top Features for negative contribution |            |                                                                                                                                                     |        |
| Fingerprint                            | Bit/Smiles | Feature Structure                                                                                                                                   | Score  |
| FCFP_2                                 | 136597326  | <p>AND Enantiomer</p>  <p>[*]C([*])C</p>                       | -0.489 |
| FCFP_2                                 | 203677720  | <p>AND Enantiomer</p>  <p>[*]C([*])[c](:[cH]:[*]):[cH]:[*]</p> | -0.406 |

|        |           |                                                                                                                                                                                             |        |
|--------|-----------|---------------------------------------------------------------------------------------------------------------------------------------------------------------------------------------------|--------|
| FCFP_2 | 565998553 | <p data-bbox="1501 118 1585 134">AND Enantiomer</p> 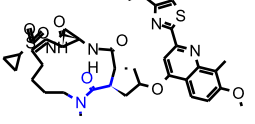 <p data-bbox="1386 308 1564 341">[*]OC(=O)C=[*]</p> | -0.348 |
|--------|-----------|---------------------------------------------------------------------------------------------------------------------------------------------------------------------------------------------|--------|

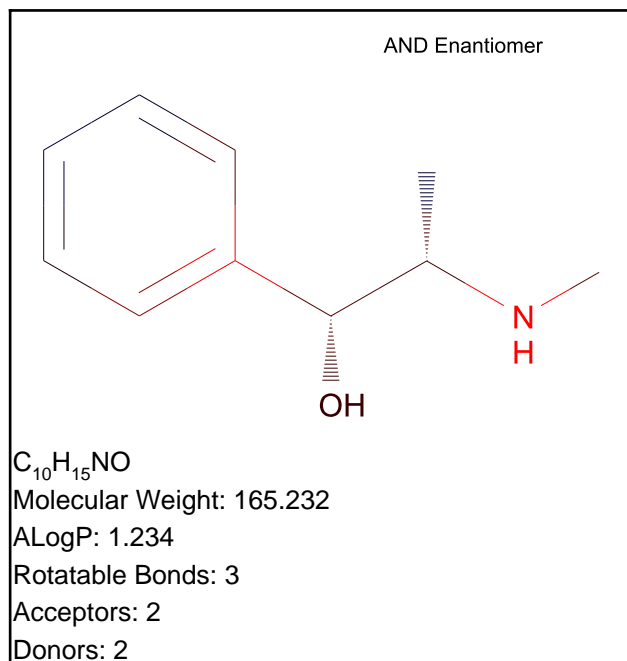

### Model Prediction

Prediction: 0.679

Unit: g/kg\_body\_weight

Mahalanobis Distance: 15.3

Mahalanobis Distance p-value: 0.635

Mahalanobis Distance: The Mahalanobis distance (MD) is a generalization of the Euclidean distance that accounts for correlations among the X properties. It is calculated as the distance to the center of the training data. The larger the MD, the less trustworthy the prediction.

Mahalanobis Distance p-value: The p-value gives the fraction of training data with an MD greater than or equal to the one for the given sample, assuming normally distributed data. The smaller the p-value, the less trustworthy the prediction. For highly non-normal X properties (e.g., fingerprints), the MD p-value is wildly inaccurate.

### Structural Similar Compounds

| Name                        | EPHEDRINE                                                                           | ANILINE; N-HYDROXYETHYL-2-METHYL                                                    | p-AMINOPHENYLETHANOL                                                                |
|-----------------------------|-------------------------------------------------------------------------------------|-------------------------------------------------------------------------------------|-------------------------------------------------------------------------------------|
| Structure                   | 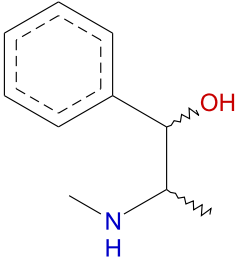 |  |  |
| Actual Endpoint (-log C)    | 2.399                                                                               | 1.837                                                                               | 1.789                                                                               |
| Predicted Endpoint (-log C) | 2.38651                                                                             | 2.16262                                                                             | 1.93606                                                                             |
| Distance                    | 0.000                                                                               | 0.405                                                                               | 0.416                                                                               |
| Reference                   | JPMSAE 60;1523;71                                                                   | JIHTAB 31;60;49                                                                     | UCDS** 8/21/61                                                                      |

### Model Applicability

Unknown features are fingerprint features in the query molecule, but not found or appearing too infrequently in the training set.

1. All properties and OPS components are within expected ranges.
2. Unknown FCFP\_6 feature: 16: [\*][c](:[\*]):[\*]
3. Unknown FCFP\_6 feature: 1186393305: [\*]C([\*])[C@H](O)[c](:[\*]):[\*]
4. Unknown FCFP\_6 feature: 1618154665: [\*][c](:[\*]):[cH]:[cH]:[\*]
5. Unknown FCFP\_6 feature: 136686699: [\*]NC

### Feature Contribution

| Top features for positive contribution |            |                                                                                                                                                  |       |
|----------------------------------------|------------|--------------------------------------------------------------------------------------------------------------------------------------------------|-------|
| Fingerprint                            | Bit/Smiles | Feature Structure                                                                                                                                | Score |
| ECFP_6                                 | 642810091  | <p>AND Enantiomer</p> 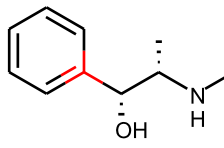 <p><chem>[*][c](:[*]):[*]</chem></p> | 0.281 |

|                                        |                   |                                                                                                                                                      |              |
|----------------------------------------|-------------------|------------------------------------------------------------------------------------------------------------------------------------------------------|--------------|
| ECFP_6                                 | -1897341097       | <p>AND Enantiomer</p> 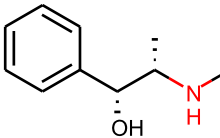 <p>[*]N[*]</p>                             | 0.216        |
| ECFP_6                                 | 1571214559        | <p>AND Enantiomer</p>  <p>[*]1:[cH]:[cH]:[cH]:[cH]:[cH]:1</p>     | 0.19         |
| Top Features for negative contribution |                   |                                                                                                                                                      |              |
| <b>Fingerprint</b>                     | <b>Bit/Smiles</b> | <b>Feature Structure</b>                                                                                                                             | <b>Score</b> |
| ECFP_6                                 | 2014710090        | <p>AND Enantiomer</p>  <p>[*]C([*])[c]1:[cH]:[cH]:[cH]:[cH]:1</p> | -0.225       |
| ECFP_6                                 | 734603939         | <p>AND Enantiomer</p>  <p>[*]C</p>                              | -0.201       |
| FCFP_6                                 | 3                 | <p>AND Enantiomer</p>  <p>[*]O</p>                              | -0.107       |





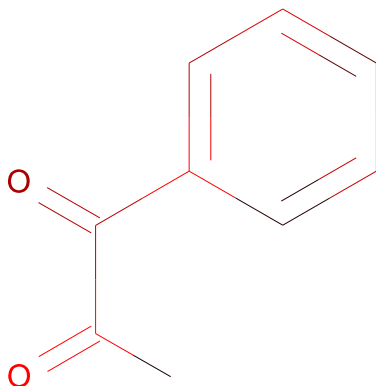C<sub>9</sub>H<sub>8</sub>O<sub>2</sub>

Molecular Weight: 148.159

ALogP: 1.446

Rotatable Bonds: 2

Acceptors: 2

Donors: 0

### Model Prediction

Prediction: 0.804

Unit: g/kg\_body\_weight

Mahalanobis Distance: 10.4

Mahalanobis Distance p-value: 1

Mahalanobis Distance: The Mahalanobis distance (MD) is a generalization of the Euclidean distance that accounts for correlations among the X properties. It is calculated as the distance to the center of the training data. The larger the MD, the less trustworthy the prediction.

Mahalanobis Distance p-value: The p-value gives the fraction of training data with an MD greater than or equal to the one for the given sample, assuming normally distributed data. The smaller the p-value, the less trustworthy the prediction. For highly non-normal X properties (e.g., fingerprints), the MD p-value is wildly inaccurate.

### Structural Similar Compounds

| Name                        | ACETOPHENONE       | METHYLBENZOATE  | PHENYL ACETATE   |
|-----------------------------|--------------------|-----------------|------------------|
| Structure                   |                    |                 |                  |
| Actual Endpoint (-log C)    | 2.169              | 2.063           | 1.922            |
| Predicted Endpoint (-log C) | 2.12357            | 1.70515         | 2.03223          |
| Distance                    | 0.334              | 0.363           | 0.390            |
| Reference                   | GTPZAB 26(8);53;82 | FAVUAI 18;69;86 | AIHAAP 30;470;69 |

### Model Applicability

Unknown features are fingerprint features in the query molecule, but not found or appearing too infrequently in the training set.

1. All properties and OPS components are within expected ranges.
2. Unknown FCFP\_6 feature: 16: [\*][c](:[\*]):[\*]
3. Unknown FCFP\_6 feature: 1618154665: [\*][c](:[\*]):[cH]:[cH]:[\*]

### Feature Contribution

#### Top features for positive contribution

| Fingerprint | Bit/Smiles | Feature Structure    | Score |
|-------------|------------|----------------------|-------|
| ECFP_6      | 642810091  | <br>[*][c](:[*]):[*] | 0.281 |

|        |             |                                                                                                                                          |       |
|--------|-------------|------------------------------------------------------------------------------------------------------------------------------------------|-------|
| ECFP_6 | 1571214559  | 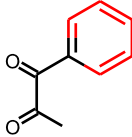<br><chem>[*]1:[cH]:[cH]:[cH]:[cH]:[cH]:[cH]:1</chem> | 0.19  |
| FCFP_6 | -1549192822 | <br><chem>[*]C(=[*])C(=O)[c]([*])[*]</chem>           | 0.168 |

### Top Features for negative contribution

| Fingerprint | Bit/Smiles | Feature Structure                                                                                                            | Score   |
|-------------|------------|------------------------------------------------------------------------------------------------------------------------------|---------|
| ECFP_6      | 734603939  | 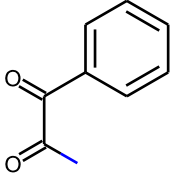<br><chem>[*]C</chem>                     | -0.201  |
| ECFP_6      | 1997021792 | <br><chem>[*]:[cH]:[cH]:[cH]:[*]</chem> | -0.0912 |
| FCFP_6      | 0          | <br><chem>[*]C([*])[*]</chem>           | -0.0791 |



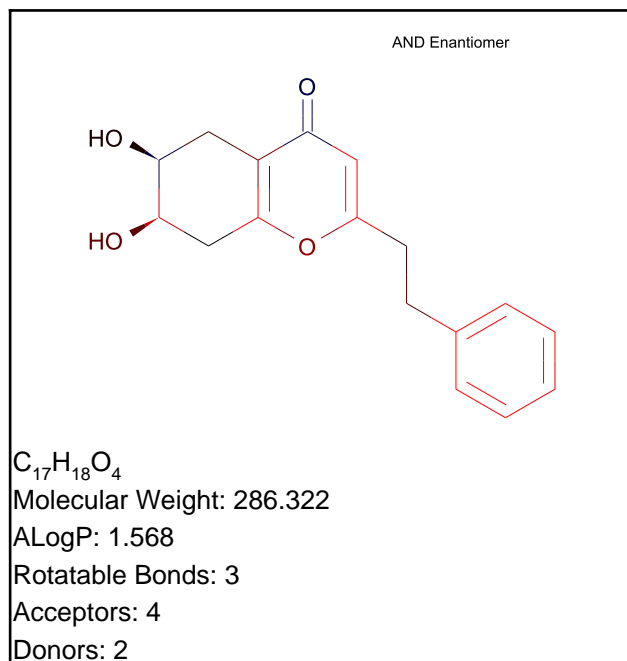

### Model Prediction

Prediction: 0.366

Unit: g/kg\_body\_weight

Mahalanobis Distance: 21.6

Mahalanobis Distance p-value: 1.44e-014

Mahalanobis Distance: The Mahalanobis distance (MD) is a generalization of the Euclidean distance that accounts for correlations among the X properties. It is calculated as the distance to the center of the training data. The larger the MD, the less trustworthy the prediction.

Mahalanobis Distance p-value: The p-value gives the fraction of training data with an MD greater than or equal to the one for the given sample, assuming normally distributed data. The smaller the p-value, the less trustworthy the prediction. For highly non-normal X properties (e.g., fingerprints), the MD p-value is wildly inaccurate.

### Structural Similar Compounds

| Name                        | CARBAMIC ACID; METHYL-; 2;3-DIHYDRO-2;2-DIMETHYL-3-HYDROXY-7-BENZOFURANYL ESTER     | BENZOIC ACID; (4-OXO-2;5-CYCLOHEXADIEN-1-YLIDENE)HYDRAZIDE; OXIME                   | PHENOBARBITAL                                                                       |
|-----------------------------|-------------------------------------------------------------------------------------|-------------------------------------------------------------------------------------|-------------------------------------------------------------------------------------|
| Structure                   | 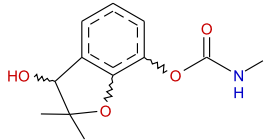 |  |  |
| Actual Endpoint (-log C)    | 4.12                                                                                | 3.382                                                                               | 3.156                                                                               |
| Predicted Endpoint (-log C) | 3.7204                                                                              | 2.73172                                                                             | 2.85686                                                                             |
| Distance                    | 0.513                                                                               | 0.524                                                                               | 0.546                                                                               |
| Reference                   | NTIS** PB85-143766                                                                  | FMCHA2 -;C63;89                                                                     | TXAPA9 18;185;71                                                                    |

### Model Applicability

Unknown features are fingerprint features in the query molecule, but not found or appearing too infrequently in the training set.

1. All properties and OPS components are within expected ranges.
2. Unknown ECFP\_2 feature: 1650944136: [\*]CC(=C([\*])[\*])O[\*]
3. Unknown FCFP\_6 feature: 16: [\*][c](:[\*]):[\*]
4. Unknown FCFP\_6 feature: 1618154665: [\*][c](:[\*]):[cH]:[cH]:[\*]

### Feature Contribution

#### Top features for positive contribution

| Fingerprint | Bit/Smiles | Feature Structure | Score |
|-------------|------------|-------------------|-------|
|             |            |                   |       |

|                                        |                   |                                                                                                                                                       |              |
|----------------------------------------|-------------------|-------------------------------------------------------------------------------------------------------------------------------------------------------|--------------|
| ECFP_6                                 | 642810091         | <p>AND Enantiomer</p> 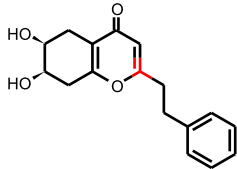 <p>[*][c](:[*]):[*]</p>                     | 0.281        |
| ECFP_6                                 | -560785749        | <p>AND Enantiomer</p>  <p>[*]C(=[*])OC(=[*])[*]</p>                | 0.259        |
| ECFP_6                                 | 1571214559        | <p>AND Enantiomer</p>  <p>[*]1:[cH]:[cH]:[cH]:[cH]:[cH]:[cH]:1</p> | 0.19         |
| Top Features for negative contribution |                   |                                                                                                                                                       |              |
| <b>Fingerprint</b>                     | <b>Bit/Smiles</b> | <b>Feature Structure</b>                                                                                                                              | <b>Score</b> |
| ECFP_6                                 | 2106656448        | <p>AND Enantiomer</p>  <p>[*]C(=O)[*]</p>                        | -0.352       |
| ECFP_6                                 | 683445015         | <p>AND Enantiomer</p>  <p>[*]O[*]</p>                            | -0.266       |

|        |             |                                                                                                                                                                                              |        |
|--------|-------------|----------------------------------------------------------------------------------------------------------------------------------------------------------------------------------------------|--------|
| ECFP_6 | -1795525632 | <p data-bbox="1507 105 1591 118">AND Enantiomer</p> 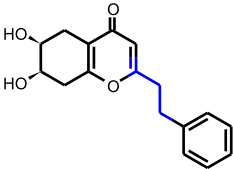 <p data-bbox="1409 326 1570 352">[*]CCC(=[*])[*]</p> | -0.176 |
|--------|-------------|----------------------------------------------------------------------------------------------------------------------------------------------------------------------------------------------|--------|

AND Enantiomer

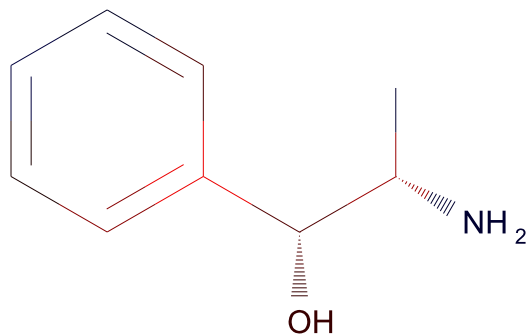 $C_9H_{13}NO$ 

Molecular Weight: 151.206

ALogP: 0.802

Rotatable Bonds: 2

Acceptors: 2

Donors: 2

## Model Prediction

Prediction: 1.18

Unit: g/kg\_body\_weight

Mahalanobis Distance: 13.1

Mahalanobis Distance p-value: 1

Mahalanobis Distance: The Mahalanobis distance (MD) is a generalization of the Euclidean distance that accounts for correlations among the X properties. It is calculated as the distance to the center of the training data. The larger the MD, the less trustworthy the prediction.

Mahalanobis Distance p-value: The p-value gives the fraction of training data with an MD greater than or equal to the one for the given sample, assuming normally distributed data. The smaller the p-value, the less trustworthy the prediction. For highly non-normal X properties (e.g., fingerprints), the MD p-value is wildly inaccurate.

## Structural Similar Compounds

| Name                        | 3-AMINO-2-METHYLBENZYL ALCOHOL | EPHEDRINE         | GLYCOLANILIDE   |
|-----------------------------|--------------------------------|-------------------|-----------------|
| Structure                   |                                |                   |                 |
| Actual Endpoint (-log C)    | 1.646                          | 2.399             | 1.949           |
| Predicted Endpoint (-log C) | 2.29496                        | 2.38651           | 1.84865         |
| Distance                    | 0.310                          | 0.314             | 0.430           |
| Reference                   | AMIHBC 10;61;54                | JPMSAE 60;1523;71 | JAPMA8 35;50;46 |

## Model Applicability

Unknown features are fingerprint features in the query molecule, but not found or appearing too infrequently in the training set.

1. All properties and OPS components are within expected ranges.
2. Unknown FCFP\_6 feature: 16: [\*][c](:[\*]):[\*]
3. Unknown FCFP\_6 feature: 1186393305: [\*]C([\*])[C@H](O)[c](:[\*]):[\*]
4. Unknown FCFP\_6 feature: 1618154665: [\*][c](:[\*]):[cH]:[cH]:[\*]

## Feature Contribution

| Top features for positive contribution |            |                                               |       |
|----------------------------------------|------------|-----------------------------------------------|-------|
| Fingerprint                            | Bit/Smiles | Feature Structure                             | Score |
| ECFP_6                                 | 642810091  | <p>AND Enantiomer</p> <p>[*][c](:[*]):[*]</p> | 0.281 |



|                                        |            |                                                                                                                                                      |        |
|----------------------------------------|------------|------------------------------------------------------------------------------------------------------------------------------------------------------|--------|
| ECFP_6                                 | 1571214559 | <p>AND Enantiomer</p> 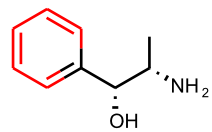 <p>[*]1:[cH]:[cH]:[cH]:[cH]:[cH]:1</p>     | 0.19   |
| FCFP_6                                 | 1070061035 | <p>AND Enantiomer</p>  <p>[*]C([*])O</p>                          | 0.0996 |
| Top Features for negative contribution |            |                                                                                                                                                      |        |
| Fingerprint                            | Bit/Smiles | Feature Structure                                                                                                                                    | Score  |
| ECFP_6                                 | 2014710090 | <p>AND Enantiomer</p>  <p>[*]C([*])[c]1:[cH]:[cH]:[cH]:[cH]:1</p> | -0.225 |
| ECFP_6                                 | 734603939  | <p>AND Enantiomer</p>  <p>[*]C</p>                              | -0.201 |
| FCFP_6                                 | 3          | <p>AND Enantiomer</p>  <p>[*]O</p>                              | -0.107 |



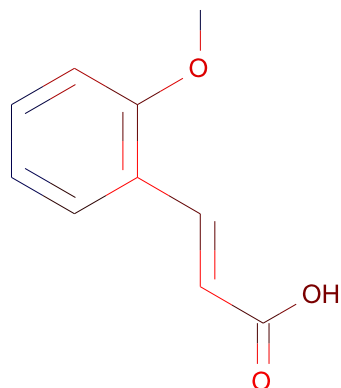
 $C_{10}H_{10}O_3$ 

Molecular Weight: 178.185

ALogP: 1.911

Rotatable Bonds: 3

Acceptors: 3

Donors: 1

## Model Prediction

Prediction: 0.976

Unit: g/kg\_body\_weight

Mahalanobis Distance: 11.6

Mahalanobis Distance p-value: 1

Mahalanobis Distance: The Mahalanobis distance (MD) is a generalization of the Euclidean distance that accounts for correlations among the X properties. It is calculated as the distance to the center of the training data. The larger the MD, the less trustworthy the prediction.

Mahalanobis Distance p-value: The p-value gives the fraction of training data with an MD greater than or equal to the one for the given sample, assuming normally distributed data. The smaller the p-value, the less trustworthy the prediction. For highly non-normal X properties (e.g., fingerprints), the MD p-value is wildly inaccurate.

## Structural Similar Compounds

| Name                        | CINNAMIC ACID; 2-ACETOXY- | p-METHOXYPHENYLACETIC ACID | ETHYL SALICYLATE |
|-----------------------------|---------------------------|----------------------------|------------------|
| Structure                   |                           |                            |                  |
| Actual Endpoint (-log C)    | 1.816                     | 2.03                       | 2.1              |
| Predicted Endpoint (-log C) | 2.18026                   | 2.31007                    | 1.7354           |
| Distance                    | 0.290                     | 0.325                      | 0.337            |
| Reference                   | JPETAB 99;450;50          | FCTXAV 14;685;76           | FCTXAV 16;751;78 |

## Model Applicability

Unknown features are fingerprint features in the query molecule, but not found or appearing too infrequently in the training set.

1. All properties and OPS components are within expected ranges.
2. Unknown FCFP\_6 feature: 16: [\*][c](:[\*]):[\*]
3. Unknown FCFP\_6 feature: 451371068: [\*]\C=C\[c](:[\*]):[\*]
4. Unknown FCFP\_6 feature: 1618154665: [\*][c](:[\*]):[cH]:[cH]:[\*]

## Feature Contribution

| Top features for positive contribution |            |                                   |       |
|----------------------------------------|------------|-----------------------------------|-------|
| Fingerprint                            | Bit/Smiles | Feature Structure                 | Score |
| ECFP_6                                 | 642810091  | <br><chem>[*][c](:[*]):[*]</chem> | 0.281 |

|                                        |             |                                                                                                          |        |
|----------------------------------------|-------------|----------------------------------------------------------------------------------------------------------|--------|
| FCFP_6                                 | 136627117   | 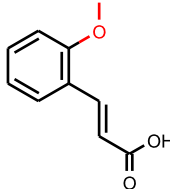<br>[*]OC             | 0.17   |
| ECFP_6                                 | -1074141656 | <br>[*]=O             | 0.142  |
| Top Features for negative contribution |             |                                                                                                          |        |
| Fingerprint                            | Bit/Smiles  | Feature Structure                                                                                        | Score  |
| ECFP_6                                 | 734603939   | <br>[*]C              | -0.201 |
| FCFP_6                                 | 1036089772  | <br>[*]:[c](:[*])OC | -0.136 |
| ECFP_6                                 | 864909220   | <br>[*]OC           | -0.119 |



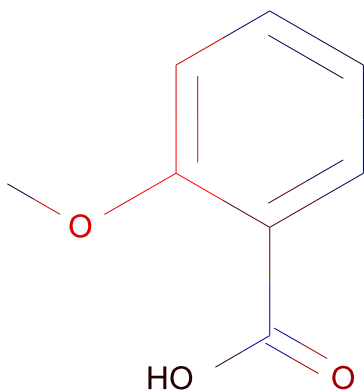C<sub>8</sub>H<sub>8</sub>O<sub>3</sub>

Molecular Weight: 152.147

ALogP: 1.443

Rotatable Bonds: 2

Acceptors: 3

Donors: 1

## Model Prediction

Prediction: 1.1

Unit: g/kg\_body\_weight

Mahalanobis Distance: 11.7

Mahalanobis Distance p-value: 1

Mahalanobis Distance: The Mahalanobis distance (MD) is a generalization of the Euclidean distance that accounts for correlations among the X properties. It is calculated as the distance to the center of the training data. The larger the MD, the less trustworthy the prediction.

Mahalanobis Distance p-value: The p-value gives the fraction of training data with an MD greater than or equal to the one for the given sample, assuming normally distributed data. The smaller the p-value, the less trustworthy the prediction. For highly non-normal X properties (e.g., fingerprints), the MD p-value is wildly inaccurate.

## Structural Similar Compounds

| Name                        | METHYL SALICYLATE | VANILLIN        | p-METHOXYPHENYLACETIC ACID |
|-----------------------------|-------------------|-----------------|----------------------------|
| Structure                   |                   |                 |                            |
| Actual Endpoint (-log C)    | 2.234             | 1.984           | 2.03                       |
| Predicted Endpoint (-log C) | 1.90826           | 1.65955         | 2.31007                    |
| Distance                    | 0.226             | 0.278           | 0.321                      |
| Reference                   | FCTXAV 2;327;64   | FCTXAV 2;327;64 | FCTXAV 14;685;76           |

## Model Applicability

Unknown features are fingerprint features in the query molecule, but not found or appearing too infrequently in the training set.

1. All properties and OPS components are within expected ranges.
2. Unknown FCFP\_6 feature: 16: [\*][c](:[\*]):[\*]
3. Unknown FCFP\_6 feature: 1618154665: [\*][c](:[\*]):[cH]:[cH]:[\*]
4. Unknown FCFP\_6 feature: -1549222613: [\*]:[c](:[\*])C(=O)O

## Feature Contribution

| Top features for positive contribution |            |                      |       |
|----------------------------------------|------------|----------------------|-------|
| Fingerprint                            | Bit/Smiles | Feature Structure    | Score |
| ECFP_6                                 | 642810091  | <br>[*][c](:[*]):[*] | 0.281 |

| FCFP_6                                 | 136627117   | 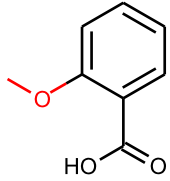<br>[*]OC             | 0.17   |
|----------------------------------------|-------------|----------------------------------------------------------------------------------------------------------|--------|
| ECFP_6                                 | -1074141656 | <br>[*]=O             | 0.142  |
| Top Features for negative contribution |             |                                                                                                          |        |
| Fingerprint                            | Bit/Smiles  | Feature Structure                                                                                        | Score  |
| ECFP_6                                 | 734603939   | <br>[*]C              | -0.201 |
| FCFP_6                                 | 1036089772  | <br>[*]:[c](:[*])OC | -0.136 |
| ECFP_6                                 | 864909220   | <br>[*]OC           | -0.119 |





AND Enantiomer

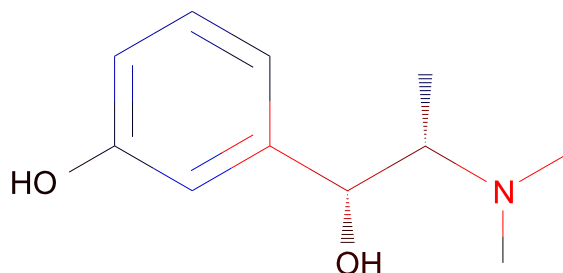C<sub>11</sub>H<sub>17</sub>NO<sub>2</sub>

Molecular Weight: 195.258

ALogP: 1.528

Rotatable Bonds: 3

Acceptors: 3

Donors: 2

## Model Prediction

Prediction: 0.712

Unit: g/kg\_body\_weight

Mahalanobis Distance: 18.1

Mahalanobis Distance p-value: 0.000499

Mahalanobis Distance: The Mahalanobis distance (MD) is a generalization of the Euclidean distance that accounts for correlations among the X properties. It is calculated as the distance to the center of the training data. The larger the MD, the less trustworthy the prediction.

Mahalanobis Distance p-value: The p-value gives the fraction of training data with an MD greater than or equal to the one for the given sample, assuming normally distributed data. The smaller the p-value, the less trustworthy the prediction. For highly non-normal X properties (e.g., fingerprints), the MD p-value is wildly inaccurate.

## Structural Similar Compounds

| Name                        | EPHEDRINE         | 3-(2-TOLYLOXY)1;2-PROPANEDIOL | PHENYLEPHRINE     |
|-----------------------------|-------------------|-------------------------------|-------------------|
| Structure                   |                   |                               |                   |
| Actual Endpoint (-log C)    | 2.399             | 2.465                         | 2.679             |
| Predicted Endpoint (-log C) | 2.38651           | 2.03752                       | 2.59876           |
| Distance                    | 0.449             | 0.469                         | 0.475             |
| Reference                   | JPMSAE 60;1523;71 | AIPTAK 130;280;61             | AIPTAK 180;155;69 |

## Model Applicability

Unknown features are fingerprint features in the query molecule, but not found or appearing too infrequently in the training set.

1. All properties and OPS components are within expected ranges.
2. Unknown ECFP\_2 feature: -1280034494: [\*]C([\*])[C@H](C)N([\*])[\*]
3. Unknown FCFP\_6 feature: 16: [\*][c](:[\*]):[\*]
4. Unknown FCFP\_6 feature: 1186393305: [\*]C([\*])[C@H](O)[c](:[\*]):[\*]
5. Unknown FCFP\_6 feature: -1946918893: [\*]C([\*])[C@H](C)N([\*])[\*]
6. Unknown FCFP\_6 feature: 1618154665: [\*][c](:[\*]):[cH]:[cH]:[\*]
7. Unknown FCFP\_6 feature: 74595001: [\*]:[cH]:[c](O):[cH]:[\*]
8. Unknown FCFP\_6 feature: -549108873: [\*]:[c](:[\*])O

## Feature Contribution

### Top features for positive contribution

| Fingerprint | Bit/Smiles | Feature Structure | Score |
|-------------|------------|-------------------|-------|
|             |            |                   |       |

|                                        |                   |                                                                                                                                                    |              |
|----------------------------------------|-------------------|----------------------------------------------------------------------------------------------------------------------------------------------------|--------------|
| ECFP_6                                 | 865379614         | <p>AND Enantiomer</p> 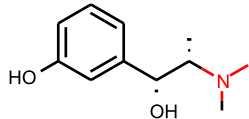 <p>[*]N([*])C</p>                        | 0.322        |
| ECFP_6                                 | 642810091         | <p>AND Enantiomer</p>  <p>[*][c](:[*]):[*]</p>                  | 0.281        |
| ECFP_6                                 | 2019062761        | <p>AND Enantiomer</p>  <p>[*]:[c](:[*])O</p>                    | 0.138        |
| Top Features for negative contribution |                   |                                                                                                                                                    |              |
| <b>Fingerprint</b>                     | <b>Bit/Smiles</b> | <b>Feature Structure</b>                                                                                                                           | <b>Score</b> |
| FCFP_6                                 | 946589555         | <p>AND Enantiomer</p>  <p>O[c]1:[cH]:[*]:[cH]:[cH]:[cH]:1</p> | -0.204       |
| ECFP_6                                 | 734603939         | <p>AND Enantiomer</p>  <p>[*]C</p>                            | -0.201       |

|        |   |                                                                                                                       |        |
|--------|---|-----------------------------------------------------------------------------------------------------------------------|--------|
| FCFP_6 | 3 | <p>AND Enantiomer</p> 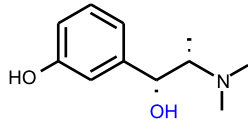 <p>[*]O</p> | -0.107 |
|--------|---|-----------------------------------------------------------------------------------------------------------------------|--------|

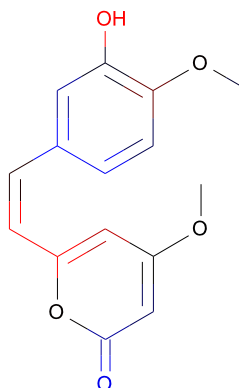
 $C_{15}H_{14}O_5$ 

Molecular Weight: 274.269

ALogP: 1.969

Rotatable Bonds: 4

Acceptors: 5

Donors: 1

## Model Prediction

Prediction: 0.765

Unit: g/kg\_body\_weight

Mahalanobis Distance: 17.1

Mahalanobis Distance p-value: 0.02

Mahalanobis Distance: The Mahalanobis distance (MD) is a generalization of the Euclidean distance that accounts for correlations among the X properties. It is calculated as the distance to the center of the training data. The larger the MD, the less trustworthy the prediction.

Mahalanobis Distance p-value: The p-value gives the fraction of training data with an MD greater than or equal to the one for the given sample, assuming normally distributed data. The smaller the p-value, the less trustworthy the prediction. For highly non-normal X properties (e.g., fingerprints), the MD p-value is wildly inaccurate.

## Structural Similar Compounds

| Name                        | CINNAMIC ACID; 2-ACETOXY- | CARBAMIC ACID; METHYL-; 2-(4;5-DIMETHYL-1;3-DIOXOLAN-2-YL)PHENYL ESTER | 5-[(o-METHOXYPHENOXY)-METHYL]-2-OXAZOLIDINONE |
|-----------------------------|---------------------------|------------------------------------------------------------------------|-----------------------------------------------|
| Structure                   |                           |                                                                        |                                               |
| Actual Endpoint (-log C)    | 1.816                     | 3.359                                                                  | 1.767                                         |
| Predicted Endpoint (-log C) | 2.18026                   | 3.85288                                                                | 2.07191                                       |
| Distance                    | 0.493                     | 0.494                                                                  | 0.532                                         |
| Reference                   | JPETAB 99;450;50          | FMCHA2 -;C256;89                                                       | TXAPA9 6;642;64                               |

## Model Applicability

Unknown features are fingerprint features in the query molecule, but not found or appearing too infrequently in the training set.

1. All properties and OPS components are within expected ranges.
2. Unknown ECFP\_2 feature: -1053980253: [\*]O\C(=C[\*])\C=[\*]
3. Unknown ECFP\_2 feature: -444332269: [\*]O\C(=C[\*])\C=[\*]
4. Unknown FCFP\_6 feature: 16: [\*][c](:[\*]):[\*]
5. Unknown FCFP\_6 feature: 1618154665: [\*][c](:[\*]):[cH]:[cH]:[\*]
6. Unknown FCFP\_6 feature: 74595001: [\*]:[cH]:[c](O):[cH]:[\*]
7. Unknown FCFP\_6 feature: -549108873: [\*]:[c](:[\*])O
8. Unknown FCFP\_6 feature: 451371068: [\*]\C=C\[c](:[\*]):[\*]

## Feature Contribution

### Top features for positive contribution

| Fingerprint | Bit/Smiles | Feature Structure | Score |
|-------------|------------|-------------------|-------|
|             |            |                   |       |

| ECFP_6                                 | 642810091  | 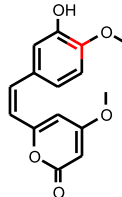<br><chem>[*][c](:[*]):[*]</chem>      | 0.281  |
|----------------------------------------|------------|---------------------------------------------------------------------------------------------------------------------------|--------|
| ECFP_6                                 | -560785749 | <br><chem>[*]C(=[*])OC(=[*])[*]</chem> | 0.259  |
| FCFP_6                                 | 436915834  | <br><chem>[*]C\C(=C[*])\O[*]</chem>    | 0.184  |
| Top Features for negative contribution |            |                                                                                                                           |        |
| Fingerprint                            | Bit/Smiles | Feature Structure                                                                                                         | Score  |
| ECFP_6                                 | 2106656448 | <br><chem>[*]C(=O)[*]</chem>          | -0.352 |
| ECFP_6                                 | 683445015  | <br><chem>[*]O[*]</chem>             | -0.266 |

|        |            |                                                                                                                                               |        |
|--------|------------|-----------------------------------------------------------------------------------------------------------------------------------------------|--------|
| ECFP_6 | 2077607946 | 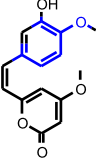<br><chem>[*]O[c]1:[cH]:[cH]:[c]1([*]):[*]:[c]:1[*]</chem> | -0.252 |
|--------|------------|-----------------------------------------------------------------------------------------------------------------------------------------------|--------|

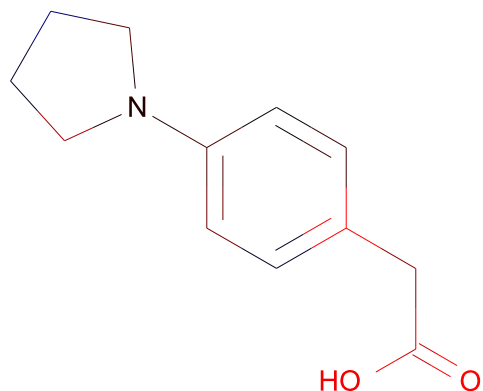

$C_{12}H_{15}NO_2$

Molecular Weight: 205.253

ALogP: 2.117

Rotatable Bonds: 3

Acceptors: 3

Donors: 1

## Model Prediction

Prediction: 0.652

Unit: g/kg\_body\_weight

Mahalanobis Distance: 16.3

Mahalanobis Distance p-value: 0.187

Mahalanobis Distance: The Mahalanobis distance (MD) is a generalization of the Euclidean distance that accounts for correlations among the X properties. It is calculated as the distance to the center of the training data. The larger the MD, the less trustworthy the prediction.

Mahalanobis Distance p-value: The p-value gives the fraction of training data with an MD greater than or equal to the one for the given sample, assuming normally distributed data. The smaller the p-value, the less trustworthy the prediction. For highly non-normal X properties (e.g., fingerprints), the MD p-value is wildly inaccurate.

## Structural Similar Compounds

| Name                        | FUROFENAC       | p-METHOXYPHENYLACETIC ACID | PHENOXYACETIC ACID; p-CHLORO |
|-----------------------------|-----------------|----------------------------|------------------------------|
| Structure                   |                 |                            |                              |
| Actual Endpoint (-log C)    | 2.202           | 2.03                       | 2.341                        |
| Predicted Endpoint (-log C) | 2.50202         | 2.31007                    | 2.38776                      |
| Distance                    | 0.388           | 0.403                      | 0.438                        |
| Reference                   | DRFUD4 3;586;78 | FCTXAV 14;685;76           | RREVAH 10;97;65              |

## Model Applicability

Unknown features are fingerprint features in the query molecule, but not found or appearing too infrequently in the training set.

1. All properties and OPS components are within expected ranges.
2. Unknown FCFP\_6 feature: 16: [\*][c](:[\*]):[\*]
3. Unknown FCFP\_6 feature: 1618154665: [\*][c](:[\*]):[cH]:[cH]:[\*]

## Feature Contribution

| Top features for positive contribution |            |                                   |       |
|----------------------------------------|------------|-----------------------------------|-------|
| Fingerprint                            | Bit/Smiles | Feature Structure                 | Score |
| ECFP_6                                 | 642810091  | <br><chem>[*][c](:[*]):[*]</chem> | 0.281 |

|                                        |             |                                                                                                                                     |         |
|----------------------------------------|-------------|-------------------------------------------------------------------------------------------------------------------------------------|---------|
| FCFP_6                                 | 675769755   | 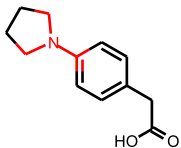<br><chem>[*]:[c](:[*])N1C[*]I[*]<br/>]C1</chem> | 0.155   |
| ECFP_6                                 | -1074141656 | <br><chem>[*]=O</chem>                           | 0.142   |
| Top Features for negative contribution |             |                                                                                                                                     |         |
| Fingerprint                            | Bit/Smiles  | Feature Structure                                                                                                                   | Score   |
| ECFP_6                                 | 670515721   | <br><chem>[*]N([*])[*]</chem>                    | -0.108  |
| ECFP_6                                 | 2025485523  | <br><chem>[*]C(=[*])O</chem>                    | -0.0801 |
| FCFP_6                                 | 0           | <br><chem>[*]C([*])[*]</chem>                  | -0.0791 |





AND Enantiomer

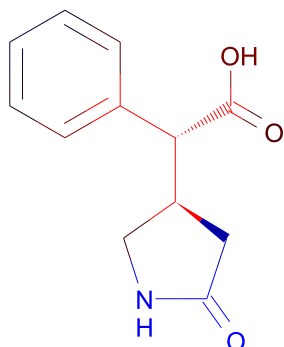C<sub>12</sub>H<sub>13</sub>NO<sub>3</sub>

Molecular Weight: 219.237

ALogP: 0.621

Rotatable Bonds: 3

Acceptors: 3

Donors: 2

## Model Prediction

Prediction: 0.566

Unit: g/kg\_body\_weight

Mahalanobis Distance: 18.5

Mahalanobis Distance p-value: 5.43e-005

Mahalanobis Distance: The Mahalanobis distance (MD) is a generalization of the Euclidean distance that accounts for correlations among the X properties. It is calculated as the distance to the center of the training data. The larger the MD, the less trustworthy the prediction.

Mahalanobis Distance p-value: The p-value gives the fraction of training data with an MD greater than or equal to the one for the given sample, assuming normally distributed data. The smaller the p-value, the less trustworthy the prediction. For highly non-normal X properties (e.g., fingerprints), the MD p-value is wildly inaccurate.

## Structural Similar Compounds

| Name                        | PHENOBARBITAL    | PRIMIDONE       | SALACETAMIDE     |
|-----------------------------|------------------|-----------------|------------------|
| Structure                   |                  |                 |                  |
| Actual Endpoint (-log C)    | 3.156            | 2.163           | 1.952            |
| Predicted Endpoint (-log C) | 2.85686          | 2.5813          | 1.75044          |
| Distance                    | 0.464            | 0.483           | 0.485            |
| Reference                   | TXAPA9 18;185;71 | NIIRDN 6;691;82 | JPETAB 89;205;47 |

## Model Applicability

Unknown features are fingerprint features in the query molecule, but not found or appearing too infrequently in the training set.

1. All properties and OPS components are within expected ranges.
2. Unknown ECFP\_2 feature: 1603312431: [\*]C([\*])[C@@H](C(=[\*])[\*])[c](:[\*]):[\*])
3. Unknown FCFP\_6 feature: 16: [\*][c](:[\*]):[\*]
4. Unknown FCFP\_6 feature: 1618154665: [\*][c](:[\*]):[cH]:[cH]:[\*]

## Feature Contribution

### Top features for positive contribution

| Fingerprint | Bit/Smiles | Feature Structure                                                      | Score |
|-------------|------------|------------------------------------------------------------------------|-------|
| FCFP_6      | 1186303932 | <p>AND Enantiomer</p> <p>[*]C([*])[C@@H](C(=[*])[*])[c](:[*]):[*])</p> | 0.375 |

|                                        |            |                                                                                                                                                             |        |
|----------------------------------------|------------|-------------------------------------------------------------------------------------------------------------------------------------------------------------|--------|
| ECFP_6                                 | 642810091  | <p>AND Enantiomer</p> 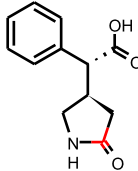 <p>[*][c](:[*]):[*]</p>                           | 0.281  |
| ECFP_6                                 | 1571214559 | <p>AND Enantiomer</p>  <p>[*]1:[cH]:[cH]:[cH]:[cH]:[cH]:[cH]:1</p>       | 0.19   |
| Top Features for negative contribution |            |                                                                                                                                                             |        |
| Fingerprint                            | Bit/Smiles | Feature Structure                                                                                                                                           | Score  |
| ECFP_6                                 | 2106656448 | <p>AND Enantiomer</p>  <p>[*]C(=O)[*]</p>                                | -0.352 |
| ECFP_6                                 | 2014710090 | <p>AND Enantiomer</p>  <p>[*]C([*])[c]1:[cH]:[cH]:[cH]:[cH]:[cH]:1</p> | -0.225 |
| FCFP_6                                 | 566058135  | <p>AND Enantiomer</p>  <p>O=C1C[*][*]N1</p>                            | -0.216 |



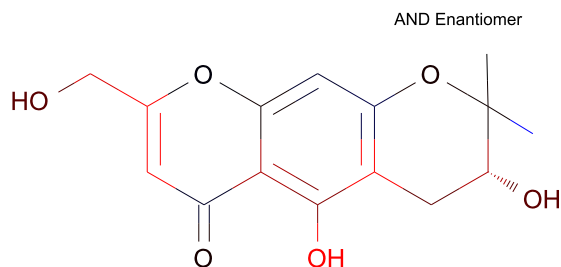
 $C_{15}H_{16}O_6$ 

Molecular Weight: 292.284

ALogP: 0.901

Rotatable Bonds: 1

Acceptors: 6

Donors: 3

## Model Prediction

Prediction: 0.113

Unit: g/kg\_body\_weight

Mahalanobis Distance: 21.8

Mahalanobis Distance p-value: 1.43e-015

Mahalanobis Distance: The Mahalanobis distance (MD) is a generalization of the Euclidean distance that accounts for correlations among the X properties. It is calculated as the distance to the center of the training data. The larger the MD, the less trustworthy the prediction.

Mahalanobis Distance p-value: The p-value gives the fraction of training data with an MD greater than or equal to the one for the given sample, assuming normally distributed data. The smaller the p-value, the less trustworthy the prediction. For highly non-normal X properties (e.g., fingerprints), the MD p-value is wildly inaccurate.

## Structural Similar Compounds

| Name                        | SALICYLIC ACID;<br>DIHYDROGEN<br>PHOSPHATE | PYRIDOXIC ACID   | PROPYL GALLATE   |
|-----------------------------|--------------------------------------------|------------------|------------------|
| Structure                   |                                            |                  |                  |
| Actual Endpoint (-log C)    | 2.296                                      | 1.388            | 2.005            |
| Predicted Endpoint (-log C) | 2.14696                                    | 2.13432          | 2.00438          |
| Distance                    | 0.600                                      | 0.624            | 0.625            |
| Reference                   | ARZNAD 30;1098;80                          | ARZNAD 11;922;61 | NTIS** PB245-441 |

## Model Applicability

Unknown features are fingerprint features in the query molecule, but not found or appearing too infrequently in the training set.

1. All properties and OPS components are within expected ranges.
2. Unknown FCFP\_6 feature: 16: [\*][c](:[\*]):[\*]
3. Unknown FCFP\_6 feature: 1618154665: [\*][c](:[\*]):[cH]:[cH]:[\*]
4. Unknown FCFP\_6 feature: 74595001: [\*]:[cH]:[c](O):[cH]:[\*]
5. Unknown FCFP\_6 feature: -549108873: [\*]:[c](:[\*])O
6. Unknown FCFP\_6 feature: -415216134: [\*]OC(C)(C)C([\*])[\*]

## Feature Contribution

### Top features for positive contribution

| Fingerprint | Bit/Smiles | Feature Structure | Score |
|-------------|------------|-------------------|-------|
|             |            |                   |       |

| ECFP_6                                 | 642810091  | <p>AND Enantiomer</p> 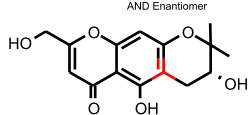 <p>[*][c](:[*]):[*]</p>      | 0.281  |
|----------------------------------------|------------|----------------------------------------------------------------------------------------------------------------------------------------|--------|
| ECFP_6                                 | -560785749 | <p>AND Enantiomer</p>  <p>[*]C(=[*])OC(=[*])[*]</p> | 0.259  |
| FCFP_6                                 | 436915834  | <p>AND Enantiomer</p>  <p>[*]C\C(=C\[*])\O[*]</p>   | 0.184  |
| Top Features for negative contribution |            |                                                                                                                                        |        |
| Fingerprint                            | Bit/Smiles | Feature Structure                                                                                                                      | Score  |
| ECFP_6                                 | 2106656448 | <p>AND Enantiomer</p>  <p>[*]C(=O)[*]</p>         | -0.352 |
| ECFP_6                                 | 683445015  | <p>AND Enantiomer</p>  <p>[*]O[*]</p>             | -0.266 |

|        |           |                                                                                                                       |        |
|--------|-----------|-----------------------------------------------------------------------------------------------------------------------|--------|
| ECFP_6 | 734603939 | <p>AND Enantiomer</p> 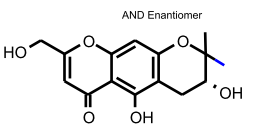 <p>[*]C</p> | -0.201 |
|--------|-----------|-----------------------------------------------------------------------------------------------------------------------|--------|

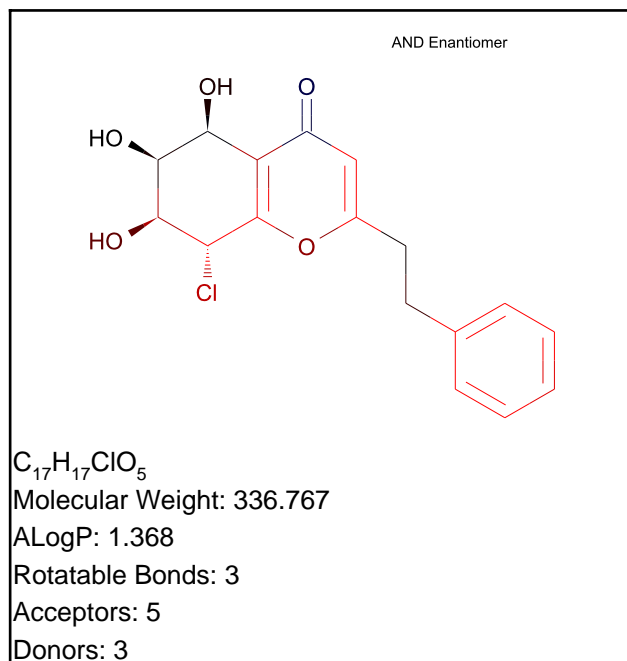

### Model Prediction

Prediction: 0.428

Unit: g/kg\_body\_weight

Mahalanobis Distance: 22

Mahalanobis Distance p-value: 4.33e-016

Mahalanobis Distance: The Mahalanobis distance (MD) is a generalization of the Euclidean distance that accounts for correlations among the X properties. It is calculated as the distance to the center of the training data. The larger the MD, the less trustworthy the prediction.

Mahalanobis Distance p-value: The p-value gives the fraction of training data with an MD greater than or equal to the one for the given sample, assuming normally distributed data. The smaller the p-value, the less trustworthy the prediction. For highly non-normal X properties (e.g., fingerprints), the MD p-value is wildly inaccurate.

### Structural Similar Compounds

| Name                        | OXAMNIQUINE                                                                         | CETOPHENICOL                                                                        | PROPYL GALLATE                                                                      |
|-----------------------------|-------------------------------------------------------------------------------------|-------------------------------------------------------------------------------------|-------------------------------------------------------------------------------------|
| Structure                   | 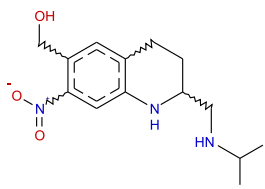 |  |  |
| Actual Endpoint (-log C)    | 3.969                                                                               | 2.465                                                                               | 2.005                                                                               |
| Predicted Endpoint (-log C) | 2.33525                                                                             | 2.80207                                                                             | 2.00438                                                                             |
| Distance                    | 0.576                                                                               | 0.585                                                                               | 0.622                                                                               |
| Reference                   | DDREDK 4;229;84                                                                     | TXAPA9 18;185;71                                                                    | NTIS** PB245-441                                                                    |

### Model Applicability

Unknown features are fingerprint features in the query molecule, but not found or appearing too infrequently in the training set.

1. All properties and OPS components are within expected ranges.
2. Unknown ECFP\_2 feature: 1652274794: [\*]OC(=C[\*])[\*]C[\*]C[\*]
3. Unknown FCFP\_6 feature: 16: [\*][c](:[\*]):[\*]
4. Unknown FCFP\_6 feature: -879019572: [\*]C[\*][C@H](Cl)C(=O)[\*]
5. Unknown FCFP\_6 feature: 1618154665: [\*][c](:[\*]):[cH]:[cH]:[\*]

### Feature Contribution

#### Top features for positive contribution

| Fingerprint | Bit/Smiles | Feature Structure                                                                                                                                                                    | Score |
|-------------|------------|--------------------------------------------------------------------------------------------------------------------------------------------------------------------------------------|-------|
| FCFP_6      | 71953198   | <p style="text-align: center;">AND Enantiomer</p> 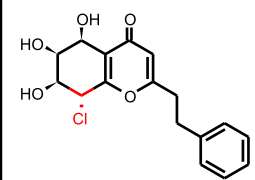 <p style="text-align: center;">[*]C[*]Cl</p> | 0.392 |



|                                        |            |                                                                                                                                        |        |
|----------------------------------------|------------|----------------------------------------------------------------------------------------------------------------------------------------|--------|
| ECFP_6                                 | 642810091  | <p>AND Enantiomer</p> 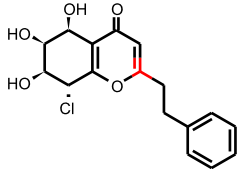 <p>[*][c](:[*]):[*]</p>      | 0.281  |
| ECFP_6                                 | -560785749 | <p>AND Enantiomer</p>  <p>[*]C(=[*])OC(=[*])[*]</p> | 0.259  |
| Top Features for negative contribution |            |                                                                                                                                        |        |
| Fingerprint                            | Bit/Smiles | Feature Structure                                                                                                                      | Score  |
| ECFP_6                                 | 2106656448 | <p>AND Enantiomer</p>  <p>[*]C(=O)[*]</p>           | -0.352 |
| ECFP_6                                 | 683445015  | <p>AND Enantiomer</p>  <p>[*]O[*]</p>             | -0.266 |
| ECFP_6                                 | -817402818 | <p>AND Enantiomer</p>  <p>[*]Cl</p>               | -0.263 |



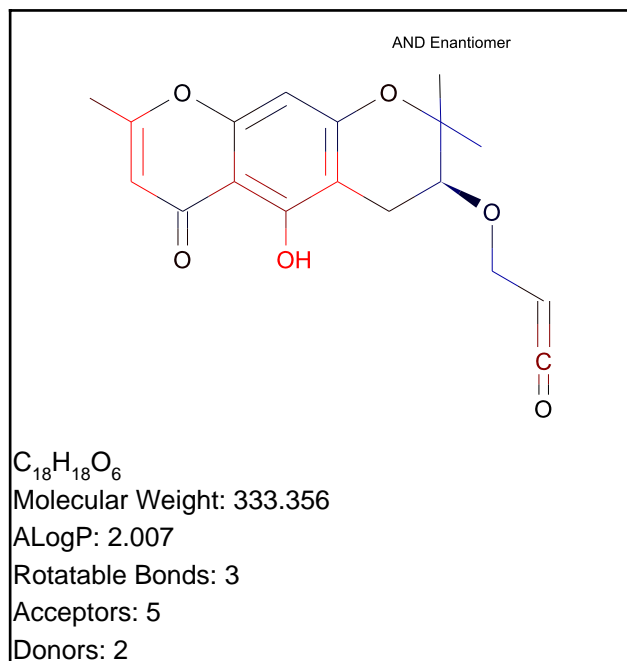

## Model Prediction

Prediction: 0.129

Unit: g/kg\_body\_weight

Mahalanobis Distance: 25.1

Mahalanobis Distance p-value: 1.24e-031

Mahalanobis Distance: The Mahalanobis distance (MD) is a generalization of the Euclidean distance that accounts for correlations among the X properties. It is calculated as the distance to the center of the training data. The larger the MD, the less trustworthy the prediction.

Mahalanobis Distance p-value: The p-value gives the fraction of training data with an MD greater than or equal to the one for the given sample, assuming normally distributed data. The smaller the p-value, the less trustworthy the prediction. For highly non-normal X properties (e.g., fingerprints), the MD p-value is wildly inaccurate.

## Structural Similar Compounds

| Name                        | N-[[[(HEXAHYDROCYCLOPENTA[c]PYRROL-2(1H)-YL)AMINO]CARBONYL]-4-METHYL-BENZENESULFONAMIDE | PHOSPHORIC ACID; 2-CHLORO-1-(2;4-DICHLOROPHENYL)VINY L ESTER                        | MYCOPHENOLIC ACID                                                                   |
|-----------------------------|-----------------------------------------------------------------------------------------|-------------------------------------------------------------------------------------|-------------------------------------------------------------------------------------|
| Structure                   | 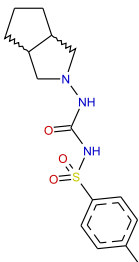     |  |  |
| Actual Endpoint (-log C)    | 1.811                                                                                   | 4.368                                                                               | 2.959                                                                               |
| Predicted Endpoint (-log C) | 1.89924                                                                                 | 2.70639                                                                             | 2.66045                                                                             |
| Distance                    | 0.546                                                                                   | 0.553                                                                               | 0.582                                                                               |
| Reference                   | YACHDS 8;2661;80                                                                        | TXAPA9 21;315;72                                                                    | TOIZAG 29;400;82                                                                    |

## Model Applicability

Unknown features are fingerprint features in the query molecule, but not found or appearing too infrequently in the training set.

1. All properties and OPS components are within expected ranges.
2. Unknown ECFP\_2 feature: -1591590376: [\*]C=C=O
3. Unknown ECFP\_2 feature: -91536905: [\*]CC=C=O
4. Unknown FCFP\_6 feature: 16: [\*][c](:[\*]):[\*]
5. Unknown FCFP\_6 feature: 1618154665: [\*][c](:[\*]):[cH]:[cH]:[\*]
6. Unknown FCFP\_6 feature: 74595001: [\*]:[cH]:[c](O):[cH]:[\*]
7. Unknown FCFP\_6 feature: -415216134: [\*]OC(C)(C)C([\*])[\*]
8. Unknown FCFP\_6 feature: -549108873: [\*]:[c](:[\*])O
9. Unknown FCFP\_6 feature: 444624378: [\*]C=C=O

## Feature Contribution

### Top features for positive contribution

| Fingerprint | Bit/Smiles | Feature Structure | Score |
|-------------|------------|-------------------|-------|
|             |            |                   |       |

|                                        |            |                                                                                                                                        |        |
|----------------------------------------|------------|----------------------------------------------------------------------------------------------------------------------------------------|--------|
| ECFP_6                                 | 642810091  | <p>AND Enantiomer</p> 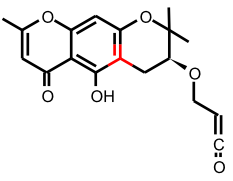 <p>[*][c](:[*]):[*]</p>      | 0.281  |
| ECFP_6                                 | -560785749 | <p>AND Enantiomer</p>  <p>[*]C(=[*])OC(=[*])[*]</p> | 0.259  |
| FCFP_6                                 | 436915834  | <p>AND Enantiomer</p>  <p>[*]C\C(=C\[*])O[*]</p>    | 0.184  |
| Top Features for negative contribution |            |                                                                                                                                        |        |
| Fingerprint                            | Bit/Smiles | Feature Structure                                                                                                                      | Score  |
| ECFP_6                                 | 2106656448 | <p>AND Enantiomer</p>  <p>[*]C(=O)[*]</p>         | -0.352 |
| ECFP_6                                 | 683445015  | <p>AND Enantiomer</p>  <p>[*]O[*]</p>             | -0.266 |

|        |           |                                                                                                                       |        |
|--------|-----------|-----------------------------------------------------------------------------------------------------------------------|--------|
| ECFP_6 | 734603939 | <p>AND Enantiomer</p> 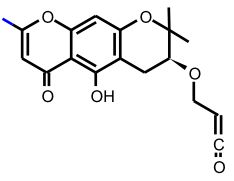 <p>[*]C</p> | -0.201 |
|--------|-----------|-----------------------------------------------------------------------------------------------------------------------|--------|

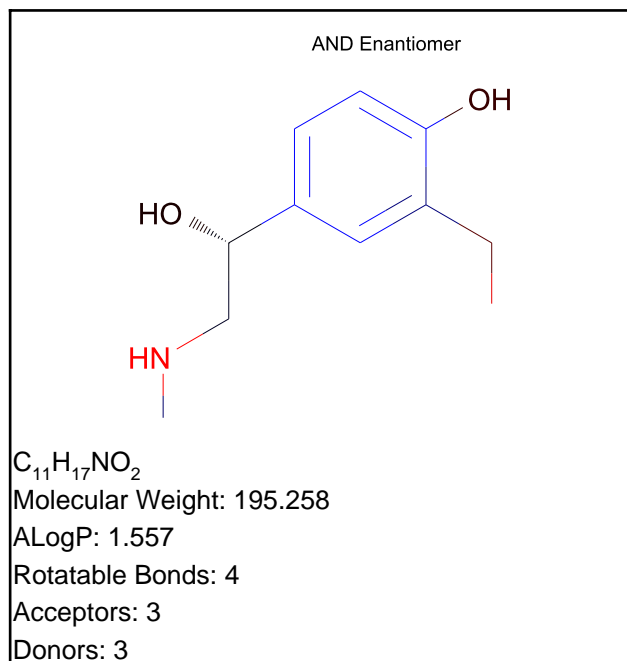

### Model Prediction

Prediction: 0.527

Unit: g/kg\_body\_weight

Mahalanobis Distance: 17.8

Mahalanobis Distance p-value: 0.00173

Mahalanobis Distance: The Mahalanobis distance (MD) is a generalization of the Euclidean distance that accounts for correlations among the X properties. It is calculated as the distance to the center of the training data. The larger the MD, the less trustworthy the prediction.

Mahalanobis Distance p-value: The p-value gives the fraction of training data with an MD greater than or equal to the one for the given sample, assuming normally distributed data. The smaller the p-value, the less trustworthy the prediction. For highly non-normal X properties (e.g., fingerprints), the MD p-value is wildly inaccurate.

### Structural Similar Compounds

| Name                        | ETILEFRINE                                                                          | PHENYLEPHRINE                                                                       | BENZYL ALCOHOL; 3,4-DIHYDROXY-.alpha.-(METHYLAMINO)METHYL]-; .HCl (HCl STRIPPED)    |
|-----------------------------|-------------------------------------------------------------------------------------|-------------------------------------------------------------------------------------|-------------------------------------------------------------------------------------|
| Structure                   | 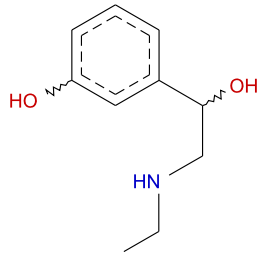 |  |  |
| Actual Endpoint (-log C)    | 3.201                                                                               | 2.679                                                                               | 3.883                                                                               |
| Predicted Endpoint (-log C) | 2.7374                                                                              | 2.59876                                                                             | 2.22971                                                                             |
| Distance                    | 0.316                                                                               | 0.318                                                                               | 0.445                                                                               |
| Reference                   | AIPTAK 180;155;69                                                                   | AIPTAK 180;155;69                                                                   | AIPTAK 180;155;69                                                                   |

### Model Applicability

Unknown features are fingerprint features in the query molecule, but not found or appearing too infrequently in the training set.

1. All properties and OPS components are within expected ranges.
2. Unknown FCFP\_6 feature: 16: [\*][c](:[\*]):[\*]
3. Unknown FCFP\_6 feature: 74595001: [\*]:[cH]:[c](O):[cH]:[\*]
4. Unknown FCFP\_6 feature: 1618154665: [\*][c](:[\*]):[cH]:[cH]:[\*]
5. Unknown FCFP\_6 feature: -549108873: [\*]:[c](:[\*])O
6. Unknown FCFP\_6 feature: 1186393305: [\*]C([\*])[C@H](O)[c](:[\*]):[\*]
7. Unknown FCFP\_6 feature: 136686699: [\*]NC

### Feature Contribution

#### Top features for positive contribution

| Fingerprint | Bit/Smiles | Feature Structure | Score |
|-------------|------------|-------------------|-------|
|             |            |                   |       |

| ECFP_6                                 | 642810091   | <p>AND Enantiomer</p> 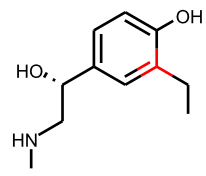 <p>[*][c](:[*]):[*]</p>                  | 0.281  |
|----------------------------------------|-------------|----------------------------------------------------------------------------------------------------------------------------------------------------|--------|
| ECFP_6                                 | -1897341097 | <p>AND Enantiomer</p>  <p>[*]N[*]</p>                           | 0.216  |
| ECFP_6                                 | 864287155   | <p>AND Enantiomer</p>  <p>[*]NC</p>                             | 0.188  |
| Top Features for negative contribution |             |                                                                                                                                                    |        |
| Fingerprint                            | Bit/Smiles  | Feature Structure                                                                                                                                  | Score  |
| FCFP_6                                 | 946589555   | <p>AND Enantiomer</p>  <p>O[c]1:[cH]:[*]:[cH]:[cH]:[cH]:1</p> | -0.204 |
| ECFP_6                                 | 734603939   | <p>AND Enantiomer</p>  <p>[*]C</p>                            | -0.201 |

FCFP\_6

-451251206

AND Enantiomer

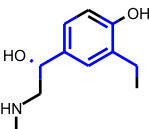

[\*]C[c]1:[cH]:[c](:[c  
H]:[\*]:[c]:1[\*])C([\*  
])[\*]

-0.143



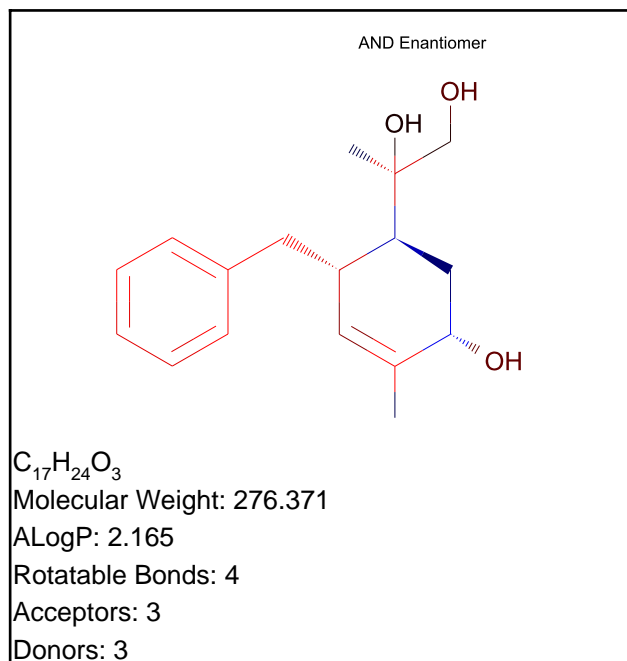

### Model Prediction

Prediction: 2.1

Unit: g/kg\_body\_weight

Mahalanobis Distance: 20.3

Mahalanobis Distance p-value: 4.92e-010

Mahalanobis Distance: The Mahalanobis distance (MD) is a generalization of the Euclidean distance that accounts for correlations among the X properties. It is calculated as the distance to the center of the training data. The larger the MD, the less trustworthy the prediction.

Mahalanobis Distance p-value: The p-value gives the fraction of training data with an MD greater than or equal to the one for the given sample, assuming normally distributed data. The smaller the p-value, the less trustworthy the prediction. For highly non-normal X properties (e.g., fingerprints), the MD p-value is wildly inaccurate.

### Structural Similar Compounds

| Name                        | CARTEOLOL .HCI (HCI STRIPPED)                                                       | 2-PHENYL-1;2-BUTANEDIOL-1-CARBAMATE                                                 | AMBROXOL                                                                            |
|-----------------------------|-------------------------------------------------------------------------------------|-------------------------------------------------------------------------------------|-------------------------------------------------------------------------------------|
| Structure                   | 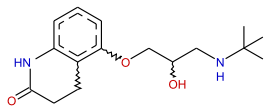 |  |  |
| Actual Endpoint (-log C)    | 2.342                                                                               | 2.538                                                                               | 1.451                                                                               |
| Predicted Endpoint (-log C) | 1.91383                                                                             | 2.27956                                                                             | 2.08503                                                                             |
| Distance                    | 0.551                                                                               | 0.604                                                                               | 0.609                                                                               |
| Reference                   | OYYAA2 11;159;76                                                                    | 27ZQAG -,394;72                                                                     | MDACAP 15;523;79                                                                    |

### Model Applicability

Unknown features are fingerprint features in the query molecule, but not found or appearing too infrequently in the training set.

1. All properties and OPS components are within expected ranges.
2. Unknown ECFP\_2 feature: -1263967621: [\*]C[C@H](C=[\*])C([\*])[\*]
3. Unknown ECFP\_2 feature: 1280892564: [\*]C[C@](C)(O)C([\*])[\*]
4. Unknown FCFP\_6 feature: 16: [\*][c](:[\*]):[\*]
5. Unknown FCFP\_6 feature: 1618154665: [\*][c](:[\*]):[cH]:[cH]:[\*]

### Feature Contribution

| Top features for positive contribution |            |                                                                                                                                     |       |
|----------------------------------------|------------|-------------------------------------------------------------------------------------------------------------------------------------|-------|
| Fingerprint                            | Bit/Smiles | Feature Structure                                                                                                                   | Score |
| ECFP_6                                 | 642810091  | <p>AND Enantiomer</p> 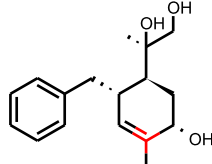 <p>[*][c](:[*]):[*]</p> | 0.281 |

|                                        |                   |                                                                                                                                                     |              |
|----------------------------------------|-------------------|-----------------------------------------------------------------------------------------------------------------------------------------------------|--------------|
| ECFP_6                                 | 1571214559        | <p>AND Enantiomer</p> 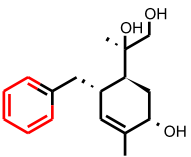 <p>[*]1:[cH]:[cH]:[cH]:[cH]:[cH]:1</p>    | 0.19         |
| ECFP_6                                 | 1095683433        | <p>AND Enantiomer</p>  <p>[*]C[c]1:[cH]:[*]:[cH]:[cH]:[cH]:1</p> | 0.123        |
| Top Features for negative contribution |                   |                                                                                                                                                     |              |
| <b>Fingerprint</b>                     | <b>Bit/Smiles</b> | <b>Feature Structure</b>                                                                                                                            | <b>Score</b> |
| ECFP_6                                 | 734603939         | <p>AND Enantiomer</p>  <p>[*]C</p>                               | -0.201       |
| ECFP_6                                 | -801490360        | <p>AND Enantiomer</p>  <p>[*]C([*])CC([*])[*]</p>              | -0.189       |
| FCFP_6                                 | 3                 | <p>AND Enantiomer</p>  <p>[*]O</p>                             | -0.107       |



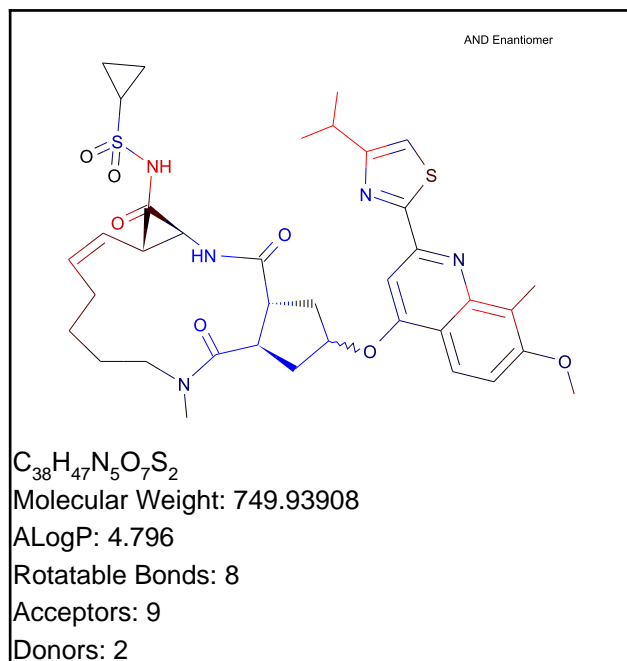

## Model Prediction

Prediction: 0.209

Unit: g/kg\_body\_weight

Mahalanobis Distance: 37.6

Mahalanobis Distance p-value: 1.1e-129

Mahalanobis Distance: The Mahalanobis distance (MD) is a generalization of the Euclidean distance that accounts for correlations among the X properties. It is calculated as the distance to the center of the training data. The larger the MD, the less trustworthy the prediction.

Mahalanobis Distance p-value: The p-value gives the fraction of training data with an MD greater than or equal to the one for the given sample, assuming normally distributed data. The smaller the p-value, the less trustworthy the prediction. For highly non-normal X properties (e.g., fingerprints), the MD p-value is wildly inaccurate.

## Structural Similar Compounds

| Name                        | ANAPREL                                                                             | RESERPINE                                                                           | PHOSPHOROTHIOIC ACID; O,O'-(SULFONYLDI-p-PHENYLENE) O,O';O',O'-TETRAMETHYL ESTER    |
|-----------------------------|-------------------------------------------------------------------------------------|-------------------------------------------------------------------------------------|-------------------------------------------------------------------------------------|
| Structure                   | 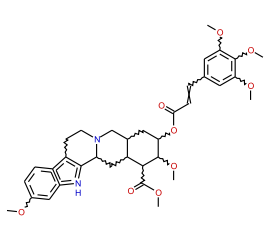 |  |  |
| Actual Endpoint (-log C)    | 2.803                                                                               | 3.161                                                                               | 2.397                                                                               |
| Predicted Endpoint (-log C) | 2.99154                                                                             | 2.72801                                                                             | 3.8515                                                                              |
| Distance                    | 1.032                                                                               | 1.042                                                                               | 1.057                                                                               |
| Reference                   | NIIRDN 6;898;82                                                                     | PSSCBG 11;555;80                                                                    | TXAPA9 21;315;72                                                                    |

## Model Applicability

Unknown features are fingerprint features in the query molecule, but not found or appearing too infrequently in the training set.

1. All properties and OPS components are within expected ranges.
2. Unknown ECFP\_2 feature: -309676563: [\*]N[C@]1(C[C@H]1[\*])C(=[\*])[\*]
3. Unknown ECFP\_2 feature: -1049290660: [\*]C1([\*])C[C@H]1C=[\*]
4. Unknown ECFP\_2 feature: 2121941848: [\*]NS(=O)(=O)C1[\*][\*]1
5. Unknown FCFP\_6 feature: 16: [\*][c](:[\*]):[\*]
6. Unknown FCFP\_6 feature: 1747237384: [\*][c](:[\*]):n[c](:[\*]):[\*]
7. Unknown FCFP\_6 feature: 690511177: [\*]:[cH]:[c](:n:[\*])[c](:[\*]):[\*]
8. Unknown FCFP\_6 feature: 1618154665: [\*][c](:[\*]):[cH]:[cH]:[\*]
9. Unknown FCFP\_6 feature: 690481386: [\*]:[c](:[\*])[c]1:n:[\*]:[\*]:s:1
10. Unknown FCFP\_6 feature: 1018942292: [\*]NS(=O)(=O)C1[\*][\*]1

## Feature Contribution

### Top features for positive contribution

| Fingerprint | Bit/Smiles | Feature Structure | Score |
|-------------|------------|-------------------|-------|
|             |            |                   |       |

|                                        |             |                                                                                                                                                                           |        |
|----------------------------------------|-------------|---------------------------------------------------------------------------------------------------------------------------------------------------------------------------|--------|
| FCFP_6                                 | 1186303932  | <p>AND Enantiomer</p> 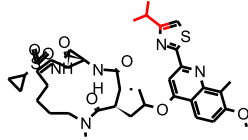 <p><chem>[*]C([*])([C@@H](C=[*])[*])[c]([*]):[*]</chem></p>     | 0.375  |
| ECFP_6                                 | 642810091   | <p>AND Enantiomer</p>  <p><chem>[*][c]([*]):[*]</chem></p>                             | 0.281  |
| ECFP_6                                 | -1897341097 | <p>AND Enantiomer</p>  <p><chem>[*]N[*]</chem></p>                                     | 0.216  |
| Top Features for negative contribution |             |                                                                                                                                                                           |        |
| Fingerprint                            | Bit/Smiles  | Feature Structure                                                                                                                                                         | Score  |
| ECFP_6                                 | 2106656448  | <p>AND Enantiomer</p>  <p><chem>[*]C(=O)[*]</chem></p>                               | -0.352 |
| ECFP_6                                 | 2077607946  | <p>AND Enantiomer</p>  <p><chem>[*]O[c]1:[cH]:[cH]:[c]1([*]):[*]:[c]:1[*]</chem></p> | -0.252 |

ECFP\_6

655739385

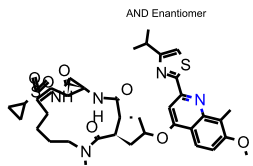

[\*]:n:[\*]

-0.239
